# Supplementary material for: RNA Binding Protein Ybx2 Regulates RNA Stability During Cold-Induced Brown Fat Activation
Source: Oxford University Press journal article supplement (doi:10.2337/db17-0655), 2017-09-29
Supplement: db170655supplementarydata3.xlsx [file db170655supplementarydata3.xlsx]

## Sheet: master_FPKM_original
tracking_id_gene_id_gene_short_name_locus	tracking_id	gene_id	gene_short_name	locus	Gene category	WT1	WT2	WT3	KO1	KO2	KO3	WT_Cold6Hr1	WT_Cold6Hr2	WT_Cold6Hr3	KO_Cold6Hr1	KO_Cold6Hr2	KO_Cold6Hr3
ENSMUSG00000000001_ENSMUSG00000000001_Gnai3_chr3:108107279-108146146	ENSMUSG00000000001	ENSMUSG00000000001	Gnai3	chr3:108107279-108146146	protein_coding	13.4854	13.5618	12.7689	14.2459	13.4966	13.1753	18.1744	17.5228	17.8827	17.4574	18.8078	19.3056
ENSMUSG00000000003_ENSMUSG00000000003_Pbsn_chrX:77837900-77853623	ENSMUSG00000000003	ENSMUSG00000000003	Pbsn	chrX:77837900-77853623	protein_coding	0	0	0	0	0	0	0	0	0	0	0	0
ENSMUSG00000000028_ENSMUSG00000000028_Cdc45_chr16:18780446-18811987	ENSMUSG00000000028	ENSMUSG00000000028	Cdc45	chr16:18780446-18811987	protein_coding	3.06881	4.03178	4.48482	3.03056	3.65561	4.41209	2.58864	2.61941	1.62646	2.47154	2.37083	1.77351
ENSMUSG00000000031_ENSMUSG00000000031_H19_chr7:142575528-142578143	ENSMUSG00000000031	ENSMUSG00000000031	H19	chr7:142575528-142578143		2.75112	4.18587	7.55133	11.6673	7.86592	6.51808	9.96696	17.544	14.0908	6.65448	6.89478	4.00138
ENSMUSG00000000037_ENSMUSG00000000037_Scml2_chrX:161117192-161258213	ENSMUSG00000000037	ENSMUSG00000000037	Scml2	chrX:161117192-161258213	protein_coding	0.222267	0.176413	0.378844	0.213391	0.378317	0.223632	0.0786443	0	0.063816	0.21292	0.0450551	0.0534743
ENSMUSG00000000049_ENSMUSG00000000049_Apoh_chr11:108343353-108414396	ENSMUSG00000000049	ENSMUSG00000000049	Apoh	chr11:108343353-108414396	protein_coding	0.0842309	0.142728	0	0.140235	0.0761586	0	0	0.493895	0.0881976	0.125558	0	0
ENSMUSG00000000056_ENSMUSG00000000056_Narf_chr11:121237252-121255856	ENSMUSG00000000056	ENSMUSG00000000056	Narf	chr11:121237252-121255856	protein_coding	6.97777	6.91921	7.46212	7.83746	8.25535	8.39047	6.60528	6.44594	7.35653	4.77891	6.00015	5.50405
ENSMUSG00000000058_ENSMUSG00000000058_Cav2_chr6:17281184-17289115	ENSMUSG00000000058	ENSMUSG00000000058	Cav2	chr6:17281184-17289115	protein_coding	53.5288	48.3727	46.7259	57.0254	56.8147	50.061	41.6187	40.1594	40.9086	32.91	39.1159	38.0688
ENSMUSG00000000078_ENSMUSG00000000078_Klf6_chr13:5861488-5870393	ENSMUSG00000000078	ENSMUSG00000000078	Klf6	chr13:5861488-5870393	protein_coding	10.027	9.35284	11.2449	10.8731	11.5414	11.2463	16.0513	10.8498	12.5874	16.0854	20.976	23.817
ENSMUSG00000000085_ENSMUSG00000000085_Scmh1_chr4:120405280-120530186	ENSMUSG00000000085	ENSMUSG00000000085	Scmh1	chr4:120405280-120530186	protein_coding	7.97769	4.90049	6.11282	11.0268	7.50055	6.34948	6.59645	4.69706	8.69052	5.98556	9.65808	6.19265
ENSMUSG00000000088_ENSMUSG00000000088_Cox5a_chr9:57521231-57532424	ENSMUSG00000000088	ENSMUSG00000000088	Cox5a	chr9:57521231-57532424	protein_coding	1098.57	1090.79	1133.18	1090.5	1049.63	1105.45	1236.7	1162.91	1154.76	1047.51	1023.79	1050.28
ENSMUSG00000000093_ENSMUSG00000000093_Tbx2_chr11:85832550-85841948	ENSMUSG00000000093	ENSMUSG00000000093	Tbx2	chr11:85832550-85841948	protein_coding	3.05502	2.43997	3.42399	2.40468	2.39476	2.05115	1.92807	2.05883	1.5269	3.00778	2.75544	2.15041
ENSMUSG00000000094_ENSMUSG00000000094_Tbx4_chr11:85886421-85916097	ENSMUSG00000000094	ENSMUSG00000000094	Tbx4	chr11:85886421-85916097	protein_coding	0	0.0254597	0	0.0250857	0	0.0509429	0.0211755	0	0	0	0.022802	0
ENSMUSG00000000103_ENSMUSG00000000103_Zfy2_chrY:2106174-2170409	ENSMUSG00000000103	ENSMUSG00000000103	Zfy2	chrY:2106174-2170409	protein_coding	0	0	0	0	0	0	0	0	0	0	0	0
ENSMUSG00000000120_ENSMUSG00000000120_Ngfr_chr11:95568817-95587735	ENSMUSG00000000120	ENSMUSG00000000120	Ngfr	chr11:95568817-95587735	protein_coding	2.09862	1.66655	2.14728	1.40773	1.71602	0.844371	0.612295	0.388027	0.456628	0.880712	0.853113	0.790615
ENSMUSG00000000125_ENSMUSG00000000125_Wnt3_chr11:103774149-103817957	ENSMUSG00000000125	ENSMUSG00000000125	Wnt3	chr11:103774149-103817957	protein_coding	0	0	0	0	0	0	0	0	0	0	0	0
ENSMUSG00000000126_ENSMUSG00000000126_Wnt9a_chr11:59306927-59333552	ENSMUSG00000000126	ENSMUSG00000000126	Wnt9a	chr11:59306927-59333552	protein_coding	0.586198	0.60842	0.817813	1.06588	1.18297	0.788669	0.318715	0.350089	0.475233	0.405007	0.423895	0.292075
ENSMUSG00000000127_ENSMUSG00000000127_Fer_chr17:63896017-64139494	ENSMUSG00000000127	ENSMUSG00000000127	Fer	chr17:63896017-64139494	protein_coding	5.12153	3.88793	3.9975	4.09182	4.8773	4.9335	2.98819	2.15112	2.22877	3.1559	3.54325	3.43952
ENSMUSG00000000131_ENSMUSG00000000131_Xpo6_chr7:126101714-126200501	ENSMUSG00000000131	ENSMUSG00000000131	Xpo6	chr7:126101714-126200501	protein_coding	11.9756	13.0259	10.392	12.3229	11.6883	12.6161	8.72672	10.0047	10.1394	13.2424	10.8542	9.65212
ENSMUSG00000000134_ENSMUSG00000000134_Tfe3_chrX:7762559-7775202	ENSMUSG00000000134	ENSMUSG00000000134	Tfe3	chrX:7762559-7775202	protein_coding	10.3296	10.9233	12.4888	12.4107	11.7549	12.3111	14.7305	11.6153	15.2654	11.2753	12.288	10.8761
ENSMUSG00000000142_ENSMUSG00000000142_Axin2_chr11:108920348-108950783	ENSMUSG00000000142	ENSMUSG00000000142	Axin2	chr11:108920348-108950783	protein_coding	6.03805	5.84418	8.2179	5.9634	7.05438	5.24376	4.28573	3.24481	3.55372	4.93476	3.59868	3.25596
ENSMUSG00000000148_ENSMUSG00000000148_Brat1_chr5:140705010-140719379	ENSMUSG00000000148	ENSMUSG00000000148	Brat1	chr5:140705010-140719379	protein_coding	3.88231	4.33022	4.84778	4.72352	5.60943	4.61338	2.12174	2.67852	2.83397	2.6975	3.67631	3.43964
ENSMUSG00000000149_ENSMUSG00000000149_Gna12_chr5:140758407-140830431	ENSMUSG00000000149	ENSMUSG00000000149	Gna12	chr5:140758407-140830431	protein_coding	40.1688	34.5383	46.1651	42.9276	41.3115	35.7074	33.9358	35.1698	31.3541	40.4567	39.1203	38.4585
ENSMUSG00000000154_ENSMUSG00000000154_Slc22a18_chr7:143473720-143499334	ENSMUSG00000000154	ENSMUSG00000000154	Slc22a18	chr7:143473720-143499334	protein_coding	0.502758	0.567571	0.555634	0.523372	0.454606	0.478594	0.220549	0.126667	0.19756	0.225008	0.82978	0
ENSMUSG00000000157_ENSMUSG00000000157_Itgb2l_chr16:96422287-96443619	ENSMUSG00000000157	ENSMUSG00000000157	Itgb2l	chr16:96422287-96443619	protein_coding	0	0	0	0	0	0	0	0	0	0	0	0
ENSMUSG00000000159_ENSMUSG00000000159_Igsf5_chr16:96361667-96525580	ENSMUSG00000000159	ENSMUSG00000000159	Igsf5	chr16:96361667-96525580	protein_coding	0	3.43587e-07	0	0	0	0	0	0	0	0	0	0
ENSMUSG00000000167_ENSMUSG00000000167_Pih1d2_chr9:50617320-50625000	ENSMUSG00000000167	ENSMUSG00000000167	Pih1d2	chr9:50617320-50625000	protein_coding	1.02505	0.346139	0.650743	0.317154	0.233117	0.585604	0.866003	0.175304	0.578721	0.612838	0.596917	0.528118
ENSMUSG00000000168_ENSMUSG00000000168_Dlat_chr9:50634632-50659780	ENSMUSG00000000168	ENSMUSG00000000168	Dlat	chr9:50634632-50659780	protein_coding	272.801	310.215	274.678	193.506	238.253	270.101	268.217	238.637	276.522	191.421	179.71	176.377
ENSMUSG00000000171_ENSMUSG00000000171_Sdhd_chr9:50596337-50603849	ENSMUSG00000000171	ENSMUSG00000000171	Sdhd	chr9:50596337-50603849	protein_coding	482.453	477.729	475.531	442.405	435.019	479.699	455.011	457.539	466.373	428.361	402.62	393.578
ENSMUSG00000000182_ENSMUSG00000000182_Fgf23_chr6:127072901-127081408	ENSMUSG00000000182	ENSMUSG00000000182	Fgf23	chr6:127072901-127081408	protein_coding	0	0	0	0	0	0	0	0	0	0	0.0390221	0
ENSMUSG00000000183_ENSMUSG00000000183_Fgf6_chr6:127015541-127024718	ENSMUSG00000000183	ENSMUSG00000000183	Fgf6	chr6:127015541-127024718	protein_coding	0	0	0	0	0.073052	0	0	0.0812905	0	0	0	0
ENSMUSG00000000184_ENSMUSG00000000184_Ccnd2_chr6:127125778-127151048	ENSMUSG00000000184	ENSMUSG00000000184	Ccnd2	chr6:127125778-127151048	protein_coding	6.65535	6.18845	6.79072	5.53515	6.51143	5.59243	6.48231	6.27475	6.54421	5.55817	6.18773	6.00103
ENSMUSG00000000194_ENSMUSG00000000194_Gpr107_chr2:31152315-31219548	ENSMUSG00000000194	ENSMUSG00000000194	Gpr107	chr2:31152315-31219548	protein_coding	12.5464	10.486	11.1346	10.1221	11.4888	10.5447	13.1328	13.2196	13.98	15.9459	12.7196	12.2131
ENSMUSG00000000197_ENSMUSG00000000197_Nalcn_chr14:123276640-123627144	ENSMUSG00000000197	ENSMUSG00000000197	Nalcn	chr14:123276640-123627144	protein_coding	0.0120032	0.0202957	0.0163965	0	0.0217626	0.0101555	0	0.0242916	0	0	0.00909802	0
ENSMUSG00000000202_ENSMUSG00000000202_Btbd17_chr11:114791216-114795945	ENSMUSG00000000202	ENSMUSG00000000202	Btbd17	chr11:114791216-114795945	protein_coding	0	0	0.037321	0.136705	0	0	0.146436	0	0	0	0	0
ENSMUSG00000000204_ENSMUSG00000000204_Slfn4_chr11:83175185-83190221	ENSMUSG00000000204	ENSMUSG00000000204	Slfn4	chr11:83175185-83190221	protein_coding	0.0474216	0.0401021	0.0647086	0.0592855	0.0429712	0.0401174	0.73425	0.432057	0.622568	0.891708	1.69482	2.10632
ENSMUSG00000000214_ENSMUSG00000000214_Th_chr7:142892751-142931128	ENSMUSG00000000214	ENSMUSG00000000214	Th	chr7:142892751-142931128	protein_coding	0	0	0	0	0	0	0	0	0.0535569	0	0	0
ENSMUSG00000000215_ENSMUSG00000000215_Ins2_chr7:142678655-142699510	ENSMUSG00000000215	ENSMUSG00000000215	Ins2	chr7:142678655-142699510	protein_coding	0.301604	0	0	0	0	0	0	0	0	0	0	0
ENSMUSG00000000216_ENSMUSG00000000216_Scnn1g_chr7:121734478-121768475	ENSMUSG00000000216	ENSMUSG00000000216	Scnn1g	chr7:121734478-121768475	protein_coding	0.0297732	0.050362	0.0203009	0.322543	0.188812	0.327416	0.460775	0.240668	0.343669	1.42937	0.834439	1.2164
ENSMUSG00000000223_ENSMUSG00000000223_Drp2_chrX:134404550-134456573	ENSMUSG00000000223	ENSMUSG00000000223	Drp2	chrX:134404550-134456573	protein_coding	0.142827	0.2769	0.107515	0.164525	0.251263	0.246804	0.118048	0.0861372	0.110509	0.317821	0.141558	0.119282
ENSMUSG00000000244_ENSMUSG00000000244_Tspan32_chr7:143005045-143019644	ENSMUSG00000000244	ENSMUSG00000000244	Tspan32	chr7:143005045-143019644	protein_coding	0.540328	0.59094	0.46114	0.817709	0.960259	0.96597	0.315936	0.348639	0.245449	0.512221	0.294861	0.288136
ENSMUSG00000000247_ENSMUSG00000000247_Lhx2_chr2:38339280-38369733	ENSMUSG00000000247	ENSMUSG00000000247	Lhx2	chr2:38339280-38369733	protein_coding	0	0.402942	0.307349	0.0665404	0	0.146595	0	0	0	0.100746	0.058821	0
ENSMUSG00000000248_ENSMUSG00000000248_Clec2g_chr6:128934380-128984707	ENSMUSG00000000248	ENSMUSG00000000248	Clec2g	chr6:128934380-128984707	protein_coding	0	0	0	0	0	0	0	0.491086	0	0	0.375596	0
ENSMUSG00000000253_ENSMUSG00000000253_Gmpr_chr13:45507443-45546382	ENSMUSG00000000253	ENSMUSG00000000253	Gmpr	chr13:45507443-45546382	protein_coding	70.7547	61.2047	81.4668	79.7834	70.0008	64.0561	1349.81	1683.63	1486.9	832.987	932.36	551.013
ENSMUSG00000000263_ENSMUSG00000000263_Glra1_chr11:55514237-55608198	ENSMUSG00000000263	ENSMUSG00000000263	Glra1	chr11:55514237-55608198	protein_coding	0	0	0	0	0	0	0	0	0	0	0	0
ENSMUSG00000000266_ENSMUSG00000000266_Mid2_chrX:140664598-140767715	ENSMUSG00000000266	ENSMUSG00000000266	Mid2	chrX:140664598-140767715	protein_coding	2.42985	2.67061	2.43024	3.18878	2.16877	2.23877	1.45524	1.71581	1.74343	1.61328	1.88134	1.72647
ENSMUSG00000000275_ENSMUSG00000000275_Trim25_chr11:88999375-89020293	ENSMUSG00000000275	ENSMUSG00000000275	Trim25	chr11:88999375-89020293	protein_coding	7.68591	7.37092	7.26705	8.33177	9.35408	7.72754	6.73688	5.73394	5.22356	11.2679	12.8598	12.2034
ENSMUSG00000000276_ENSMUSG00000000276_Dgke_chr11:89035178-89066850	ENSMUSG00000000276	ENSMUSG00000000276	Dgke	chr11:89035178-89066850	protein_coding	1.60432	1.40714	1.31181	1.45064	1.63691	1.13519	0.828206	1.03887	0.678436	1.03476	1.21182	1.11012
ENSMUSG00000000278_ENSMUSG00000000278_Scpep1_chr11:88924019-88955465	ENSMUSG00000000278	ENSMUSG00000000278	Scpep1	chr11:88924019-88955465	protein_coding	35.0315	30.639	33.4081	41.6405	35.8495	39.2715	37.2846	38.6308	35.1765	34.3592	30.5381	30.8415
ENSMUSG00000000282_ENSMUSG00000000282_Mnt_chr11:74830919-74845725	ENSMUSG00000000282	ENSMUSG00000000282	Mnt	chr11:74830919-74845725	protein_coding	3.73831	3.46969	4.79296	4.29838	4.01921	4.42777	2.13739	2.02776	2.02555	3.02856	3.92999	3.0538
ENSMUSG00000000290_ENSMUSG00000000290_Itgb2_chr10:77530251-77565708	ENSMUSG00000000290	ENSMUSG00000000290	Itgb2	chr10:77530251-77565708	protein_coding	2.15996	2.35186	2.65082	3.63111	2.82917	2.57716	4.53323	3.53024	3.2509	5.31534	7.39571	7.38913
ENSMUSG00000000295_ENSMUSG00000000295_Hddc2_chr10:31313381-31328204	ENSMUSG00000000295	ENSMUSG00000000295	Hddc2	chr10:31313381-31328204	protein_coding	15.3797	11.3365	15.8292	12.8791	13.173	14.4913	9.84384	7.43586	7.19315	12.2243	10.0494	10.8939
ENSMUSG00000000296_ENSMUSG00000000296_Tpd52l1_chr10:31332379-31445921	ENSMUSG00000000296	ENSMUSG00000000296	Tpd52l1	chr10:31332379-31445921	protein_coding	5.15603	4.76228	4.66608	4.87799	4.09773	4.82189	2.62938	2.2802	1.96369	3.24371	3.72142	2.95703
ENSMUSG00000000301_ENSMUSG00000000301_Pemt_chr11:59970613-60046489	ENSMUSG00000000301	ENSMUSG00000000301	Pemt	chr11:59970613-60046489	protein_coding	3.29289	4.57779	6.01944	7.55247	5.48666	5.1409	5.58284	4.9467	5.1387	7.75047	6.36288	5.13713
ENSMUSG00000000303_ENSMUSG00000000303_Cdh1_chr8:106603350-106670246	ENSMUSG00000000303	ENSMUSG00000000303	Cdh1	chr8:106603350-106670246	protein_coding	0.0392637	0	0	0.0163631	0	0.0234046	0	0.0279601	0	0.0442796	0.0209586	0.0829807
ENSMUSG00000000305_ENSMUSG00000000305_Cdh4_chr2:179442430-179899373	ENSMUSG00000000305	ENSMUSG00000000305	Cdh4	chr2:179442430-179899373	protein_coding	0.0808144	0.135598	0.110971	0.145395	0.416652	0.763787	0.319897	0.149323	0.0140858	0.470361	0.117244	0.307413
ENSMUSG00000000308_ENSMUSG00000000308_Ckmt1_chr2:121357713-121363737	ENSMUSG00000000308	ENSMUSG00000000308	Ckmt1	chr2:121357713-121363737	protein_coding	0	0.108964	0.0858853	0	0	0	0.160052	0	0.176757	0.26514	0	0
ENSMUSG00000000317_ENSMUSG00000000317_Bcl6b_chr11:70224127-70229798	ENSMUSG00000000317	ENSMUSG00000000317	Bcl6b	chr11:70224127-70229798	protein_coding	5.60028	4.51756	7.70055	9.11071	8.53243	7.73181	6.38137	5.27345	4.90515	8.89656	8.36542	10.0926
ENSMUSG00000000318_ENSMUSG00000000318_Clec10a_chr11:70156196-70170834	ENSMUSG00000000318	ENSMUSG00000000318	Clec10a	chr11:70156196-70170834	protein_coding	12.926	9.17186	11.6603	13.3662	7.17876	11.1268	6.13302	7.39891	8.83717	10.4104	12.0072	9.82178
ENSMUSG00000000320_ENSMUSG00000000320_Alox12_chr11:70241456-70255353	ENSMUSG00000000320	ENSMUSG00000000320	Alox12	chr11:70241456-70255353	protein_coding	0.830669	0.668108	1.0836	0.631017	0.858371	0.62847	0.226173	0.299779	0.155655	0.195921	0.210789	0.088687
ENSMUSG00000000325_ENSMUSG00000000325_Arvcf_chr16:18348181-18407076	ENSMUSG00000000325	ENSMUSG00000000325	Arvcf	chr16:18348181-18407076	protein_coding	1.15333	1.23228	3.22576	1.738	1.54695	2.10947	0.715239	0.917948	0.796491	0.818705	0.828773	0.710825
ENSMUSG00000000326_ENSMUSG00000000326_Comt_chr16:18406885-18426852	ENSMUSG00000000326	ENSMUSG00000000326	Comt	chr16:18406885-18426852	protein_coding	160.555	187.738	187.583	95.0567	153.57	151.683	152.246	133.833	153.324	100.617	95.1792	101.607
ENSMUSG00000000339_ENSMUSG00000000339_Rtca_chr3:116488962-116508208	ENSMUSG00000000339	ENSMUSG00000000339	Rtca	chr3:116488962-116508208	protein_coding	10.0443	11.2611	12.2064	12.494	11.4616	13.0378	17.0331	12.957	13.1565	12.0855	10.3411	13.6691
ENSMUSG00000000340_ENSMUSG00000000340_Dbt_chr3:116513069-116549976	ENSMUSG00000000340	ENSMUSG00000000340	Dbt	chr3:116513069-116549976	protein_coding	51.1207	49.2245	42.0229	55.7084	47.9955	55.5948	58.8903	58.9887	57.3393	58.9262	54.7054	55.9961
ENSMUSG00000000346_ENSMUSG00000000346_Dazap2_chr15:100615627-100620731	ENSMUSG00000000346	ENSMUSG00000000346	Dazap2	chr15:100615627-100620731	protein_coding	63.4578	63.5035	62.2293	68.0352	65.228	67.043	47.1288	47.6964	47.5927	42.5466	45.3572	46.6529
ENSMUSG00000000355_ENSMUSG00000000355_Mcts1_chrX:38600577-38613426	ENSMUSG00000000355	ENSMUSG00000000355	Mcts1	chrX:38600577-38613426	protein_coding	29.1093	32.5851	34.0361	31.29	28.8143	32.1503	35.4937	37.0756	39.779	28.2418	31.756	35.2244
ENSMUSG00000000359_ENSMUSG00000000359_Rem1_chr2:152626950-152635198	ENSMUSG00000000359	ENSMUSG00000000359	Rem1	chr2:152626950-152635198	protein_coding	1.99144	1.61022	2.22258	2.30059	2.21435	1.7323	1.73962	2.55462	1.32784	2.49759	2.53023	2.32095
ENSMUSG00000000365_ENSMUSG00000000365_Rnf17_chr14:56402696-56525032	ENSMUSG00000000365	ENSMUSG00000000365	Rnf17	chr14:56402696-56525032	protein_coding	0.01678	0	0.0114556	0.0419607	0	0.0141964	0.0118144	0	0	0	0.0254329	0.0334454
ENSMUSG00000000374_ENSMUSG00000000374_Trappc10_chr10:78186724-78244642	ENSMUSG00000000374	ENSMUSG00000000374	Trappc10	chr10:78186724-78244642	protein_coding	12.5195	11.4978	12.0426	13.105	11.9682	12.2581	12.5645	12.3685	12.137	11.4488	11.4474	11.794
ENSMUSG00000000378_ENSMUSG00000000378_Ccm2_chr11:6546886-6596744	ENSMUSG00000000378	ENSMUSG00000000378	Ccm2	chr11:6546886-6596744	protein_coding	17.6905	15.7904	23.9188	23.7963	20.0917	26.7909	18.5116	15.3513	21.8021	14.574	14.6078	18.3086
ENSMUSG00000000381_ENSMUSG00000000381_Wap_chr11:6635481-6638637	ENSMUSG00000000381	ENSMUSG00000000381	Wap	chr11:6635481-6638637	protein_coding	0	0	0	0	0	0	0	0	0	0	0	0
ENSMUSG00000000384_ENSMUSG00000000384_Tbrg4_chr11:6615597-6626067	ENSMUSG00000000384	ENSMUSG00000000384	Tbrg4	chr11:6615597-6626067	protein_coding	39.9765	34.4703	47.441	39.0043	41.9969	40.0806	59.1681	61.9404	56.2676	55.2233	57.7829	52.7373
ENSMUSG00000000385_ENSMUSG00000000385_Tmprss2_chr16:97564683-97611195	ENSMUSG00000000385	ENSMUSG00000000385	Tmprss2	chr16:97564683-97611195	protein_coding	0.0280797	0	0	0	0.0254405	0.0237537	0	0	0	0	0	0
ENSMUSG00000000386_ENSMUSG00000000386_Mx1_chr16:97447034-97462907	ENSMUSG00000000386	ENSMUSG00000000386	Mx1	chr16:97447034-97462907	protein_coding	0.588836	0.100024	0.120645	0.271413	0.207965	0.311008	0.242804	0.238646	0.238711	0.220511	0.170126	0.350661
ENSMUSG00000000392_ENSMUSG00000000392_Fap_chr2:62500942-62574075	ENSMUSG00000000392	ENSMUSG00000000392	Fap	chr2:62500942-62574075	protein_coding	2.49835	2.61492	2.47542	2.91684	2.85532	2.91993	0.911648	1.44628	0.94225	1.19005	1.67921	1.70426
ENSMUSG00000000394_ENSMUSG00000000394_Gcg_chr2:62474529-62483650	ENSMUSG00000000394	ENSMUSG00000000394	Gcg	chr2:62474529-62483650	protein_coding	0	0	0	0	0	0	0	0	0	0	0	0
ENSMUSG00000000399_ENSMUSG00000000399_Ndufa9_chr6:126821862-126849144	ENSMUSG00000000399	ENSMUSG00000000399	Ndufa9	chr6:126821862-126849144	protein_coding	326.805	314.021	324.469	306.67	303.721	322.867	299.228	304.496	313.154	295.87	262.476	265.314
ENSMUSG00000000402_ENSMUSG00000000402_Egfl6_chrX:166523006-166585720	ENSMUSG00000000402	ENSMUSG00000000402	Egfl6	chrX:166523006-166585720	protein_coding	0.033193	0	0.0226254	0.0829771	0.0300675	0	0	0	0	0	0	0
ENSMUSG00000000409_ENSMUSG00000000409_Lck_chr4:129548343-129573641	ENSMUSG00000000409	ENSMUSG00000000409	Lck	chr4:129548343-129573641	protein_coding	0.586195	1.08265	0.285635	0.591374	0.681954	0.567369	0.100244	0.434216	0.227794	0.345564	0.336126	0.890941
ENSMUSG00000000411_ENSMUSG00000000411_Tssk3_chr4:129489013-129491022	ENSMUSG00000000411	ENSMUSG00000000411	Tssk3	chr4:129489013-129491022	protein_coding	0	0	0	0	0.0697982	0.0652549	0	0	0	0	0	0.0768757
ENSMUSG00000000416_ENSMUSG00000000416_Cttnbp2_chr6:18366477-18515338	ENSMUSG00000000416	ENSMUSG00000000416	Cttnbp2	chr6:18366477-18515338	protein_coding	0.318411	0.343205	0.676804	0.892593	0.30499	0.0871591	0.234592	0.349734	0.0216594	0.0354615	0.256862	0.414992
ENSMUSG00000000420_ENSMUSG00000000420_Galnt1_chr18:24205343-24286818	ENSMUSG00000000420	ENSMUSG00000000420	Galnt1	chr18:24205343-24286818	protein_coding	19.7019	17.2537	20.9427	18.8589	18.8639	20.5062	22.3545	17.4932	20.5066	19.3248	21.1914	20.5174
ENSMUSG00000000435_ENSMUSG00000000435_Myf5_chr10:107482907-107486134	ENSMUSG00000000435	ENSMUSG00000000435	Myf5	chr10:107482907-107486134	protein_coding	0.0441711	0	0.0300769	0	0.0399959	0.03736	0	0	0.0463246	0.0353213	0	0
ENSMUSG00000000439_ENSMUSG00000000439_Mkrn2_chr6:115601937-115618670	ENSMUSG00000000439	ENSMUSG00000000439	Mkrn2	chr6:115601937-115618670	protein_coding	11.4135	13.1728	13.7993	11.513	12.1448	11.7226	6.79099	6.99565	7.39676	6.74832	5.37037	6.17357
ENSMUSG00000000440_ENSMUSG00000000440_Pparg_chr6:115361220-115490401	ENSMUSG00000000440	ENSMUSG00000000440	Pparg	chr6:115361220-115490401	protein_coding	151.704	115.188	141.77	106.85	113.772	124.085	141.676	133.948	138.955	141.461	125.834	125.552
ENSMUSG00000000441_ENSMUSG00000000441_Raf1_chr6:115618066-115676635	ENSMUSG00000000441	ENSMUSG00000000441	Raf1	chr6:115618066-115676635	protein_coding	28.5969	32.1313	32.1734	38.4665	30.3229	27.4942	40.142	41.0813	43.0789	33.1253	30.7346	30.2525
ENSMUSG00000000486_ENSMUSG00000000486_Sept1_chr7:127214446-127218498	ENSMUSG00000000486	ENSMUSG00000000486	Sept1	chr7:127214446-127218498	protein_coding	7.64063	5.91969	5.88895	8.42214	7.17233	8.04503	2.60691	2.11656	5.56904	2.28526	2.09829	2.40469
ENSMUSG00000000489_ENSMUSG00000000489_Pdgfb_chr15:79995899-80014808	ENSMUSG00000000489	ENSMUSG00000000489	Pdgfb	chr15:79995899-80014808	protein_coding	6.20661	7.21469	8.48418	9.32507	9.52817	7.73315	18.4528	18.9054	14.79	26.9828	28.9715	26.506
ENSMUSG00000000530_ENSMUSG00000000530_Acvrl1_chr15:101128521-101145336	ENSMUSG00000000530	ENSMUSG00000000530	Acvrl1	chr15:101128521-101145336	protein_coding	7.54166	7.07991	9.40937	10.4031	11.9655	9.82742	11.876	12.479	11.1837	15.7515	18.9504	16.5664
ENSMUSG00000000531_ENSMUSG00000000531_Grasp_chr15:101224206-101232755	ENSMUSG00000000531	ENSMUSG00000000531	Grasp	chr15:101224206-101232755	protein_coding	3.07406	2.98903	3.31108	3.82226	4.40347	3.10448	2.64378	2.63906	1.92461	3.30178	4.06382	3.61142
ENSMUSG00000000532_ENSMUSG00000000532_Acvr1b_chr15:101174103-101213678	ENSMUSG00000000532	ENSMUSG00000000532	Acvr1b	chr15:101174103-101213678	protein_coding	2.54602	2.64061	2.95943	3.0671	3.04649	2.72609	3.57043	2.89646	2.50568	5.41356	6.43584	8.44433
ENSMUSG00000000538_ENSMUSG00000000538_Tom1l2_chr11:60226713-60352905	ENSMUSG00000000538	ENSMUSG00000000538	Tom1l2	chr11:60226713-60352905	protein_coding	20.7259	18.346	20.4553	18.2512	16.086	15.2695	14.3197	11.1978	12.1501	13.8638	15.3608	12.9632
ENSMUSG00000000544_ENSMUSG00000000544_Gpa33_chr1:166130237-166166510	ENSMUSG00000000544	ENSMUSG00000000544	Gpa33	chr1:166130237-166166510	protein_coding	0	0	0	0	0	0	0	0	0	0	0	0
ENSMUSG00000000552_ENSMUSG00000000552_Zfp385a_chr15:103313894-103340086	ENSMUSG00000000552	ENSMUSG00000000552	Zfp385a	chr15:103313894-103340086	protein_coding	6.91927	6.52613	7.58484	8.28295	6.66239	6.28985	7.18448	8.23031	7.59158	6.45637	5.51023	5.70568
ENSMUSG00000000555_ENSMUSG00000000555_Itga5_chr15:103344288-103366763	ENSMUSG00000000555	ENSMUSG00000000555	Itga5	chr15:103344288-103366763	protein_coding	1.90769	2.13399	3.17359	2.79915	3.16964	2.30319	8.23909	6.32994	6.55025	8.38299	12.8142	13.9218
ENSMUSG00000000560_ENSMUSG00000000560_Gabra2_chr5:70961056-71095849	ENSMUSG00000000560	ENSMUSG00000000560	Gabra2	chr5:70961056-71095849	protein_coding	0.758583	0.60961	0.439314	0.252821	0.515277	0.38499	0.133336	0.153197	0.0795764	0.121352	0.143609	0.113379
ENSMUSG00000000561_ENSMUSG00000000561_Wdr77_chr3:105959368-105984600	ENSMUSG00000000561	ENSMUSG00000000561	Wdr77	chr3:105959368-105984600	protein_coding	11.7056	12.0372	14.4888	15.242	14.4991	13.0768	22.5958	20.5555	22.3029	23.7864	29.0891	33.2688
ENSMUSG00000000562_ENSMUSG00000000562_Adora3_chr3:105870857-105908928	ENSMUSG00000000562	ENSMUSG00000000562	Adora3	chr3:105870857-105908928	protein_coding	0.0818205	0.0324111	0.0261037	0.136229	0.147972	0	0.0567653	0.0823255	0.0856818	0	0.174083	0.0814985
ENSMUSG00000000563_ENSMUSG00000000563_Atp5f1_chr3:105942697-105960099	ENSMUSG00000000563	ENSMUSG00000000563	Atp5f1	chr3:105942697-105960099	protein_coding	362.316	366.618	347.781	332.728	338.195	347.333	364.378	358.304	358.549	326.895	328.084	308.408
ENSMUSG00000000567_ENSMUSG00000000567_Sox9_chr11:112782223-112787760	ENSMUSG00000000567	ENSMUSG00000000567	Sox9	chr11:112782223-112787760	protein_coding	0.33769	0.196316	0.36007	0.51014	0.420787	0.303539	0.222834	0.298769	0.332323	0.777115	1.02349	1.03061
ENSMUSG00000000568_ENSMUSG00000000568_Hnrnpd_chr5:99958425-99978938	ENSMUSG00000000568	ENSMUSG00000000568	Hnrnpd	chr5:99958425-99978938	protein_coding	48.2038	49.8863	45.3537	50.1206	43.8275	44.2147	47.2457	45.952	46.6045	62.5244	62.9206	64.4357
ENSMUSG00000000579_ENSMUSG00000000579_Dynlt1c_chr17:6601670-6609774	ENSMUSG00000000579	ENSMUSG00000000579	Dynlt1c	chr17:6601670-6609774	protein_coding	11.1009	11.6855	11.1206	7.21942	9.55648	9.49509	7.87631	6.526	6.40886	6.3486	7.28802	6.55519
ENSMUSG00000000581_ENSMUSG00000000581_C1d_chr11:17257578-17269176	ENSMUSG00000000581	ENSMUSG00000000581	C1d	chr11:17257578-17269176	protein_coding	19.475	23.6712	24.6778	21.9185	25.3936	21.3995	30.064	27.256	20.9202	30.6193	22.3606	22.306
ENSMUSG00000000594_ENSMUSG00000000594_Gm2a_chr11:55098114-55113029	ENSMUSG00000000594	ENSMUSG00000000594	Gm2a	chr11:55098114-55113029	protein_coding	19.0761	20.387	20.5513	20.6587	22.0405	22.6151	15.6599	12.9374	16.428	10.6648	10.3199	10.5378
ENSMUSG00000000600_ENSMUSG00000000600_Krit1_chr5:3803164-3844515	ENSMUSG00000000600	ENSMUSG00000000600	Krit1	chr5:3803164-3844515	protein_coding	2.97134	3.49119	3.04234	3.26474	3.29555	3.30392	3.58632	2.93617	3.168	2.96884	3.0684	3.24708
ENSMUSG00000000605_ENSMUSG00000000605_Clcn4-2_chr7:7282315-7299511	ENSMUSG00000000605	ENSMUSG00000000605	Clcn4-2	chr7:7282315-7299511	protein_coding	10.451	9.79925	10.4735	11.0983	11.5862	9.06635	12.538	10.9912	13.5202	11.5699	11.4984	10.7932
ENSMUSG00000000606_ENSMUSG00000000606_Vmn2r88_chr14:51411000-51419527	ENSMUSG00000000606	ENSMUSG00000000606	Vmn2r88	chr14:51411000-51419527	protein_coding	0	0	0	0	0	0	0	0	0	0	0	0
ENSMUSG00000000617_ENSMUSG00000000617_Grm6_chr11:50850684-50866208	ENSMUSG00000000617	ENSMUSG00000000617	Grm6	chr11:50850684-50866208	protein_coding	0	0	0	0	0	0	0	0	0	0	0	0.0266629
ENSMUSG00000000627_ENSMUSG00000000627_Sema4f_chr6:82911884-82939769	ENSMUSG00000000627	ENSMUSG00000000627	Sema4f	chr6:82911884-82939769	protein_coding	0.106861	0.108434	0.10209	0.0712522	0.135577	0.144645	0.738937	0.131494	0.112172	0.424457	0.259806	0.25558
ENSMUSG00000000628_ENSMUSG00000000628_Hk2_chr6:82725024-82774454	ENSMUSG00000000628	ENSMUSG00000000628	Hk2	chr6:82725024-82774454	protein_coding	55.0478	58.8038	58.1052	42.1336	51.1418	49.3711	115.756	112.099	121.596	80.9183	71.8348	71.6222
ENSMUSG00000000631_ENSMUSG00000000631_Myo18a_chr11:77763245-77865980	ENSMUSG00000000631	ENSMUSG00000000631	Myo18a	chr11:77763245-77865980	protein_coding	13.1551	14.8808	21.4572	16.4116	16.9173	13.7593	16.3609	13.1222	14.2015	15.8996	16.0601	14.6138
ENSMUSG00000000632_ENSMUSG00000000632_Sez6_chr11:77930799-77979048	ENSMUSG00000000632	ENSMUSG00000000632	Sez6	chr11:77930799-77979048	protein_coding	0.0773022	0.217915	0.123148	0.355675	0.144339	0.263141	0	0	0	0	0	0
ENSMUSG00000000673_ENSMUSG00000000673_Haao_chr17:83831355-83846790	ENSMUSG00000000673	ENSMUSG00000000673	Haao	chr17:83831355-83846790	protein_coding	0	0.207227	0.110705	0.271657	0.295074	0.137949	0.0571903	0	0	0	0	0
ENSMUSG00000000682_ENSMUSG00000000682_Cd52_chr4:134082447-134095082	ENSMUSG00000000682	ENSMUSG00000000682	Cd52	chr4:134082447-134095082	protein_coding	5.37106	5.47994	6.26791	4.90693	8.44256	8.73188	3.90801	3.99706	3.62965	3.82914	6.56001	7.21554
ENSMUSG00000000686_ENSMUSG00000000686_Abhd15_chr11:77515120-77538607	ENSMUSG00000000686	ENSMUSG00000000686	Abhd15	chr11:77515120-77538607	protein_coding	4.54771	5.02151	6.12363	5.4294	5.72589	6.11032	11.1731	11.3285	11.5554	7.13027	6.59679	5.79723
ENSMUSG00000000690_ENSMUSG00000000690_Hoxb6_chr11:96292475-96301568	ENSMUSG00000000690	ENSMUSG00000000690	Hoxb6	chr11:96292475-96301568	protein_coding	1.15871	0.730506	1.01401	0.844745	1.32344	0.439325	0.328527	0.50134	0.34661	0.30008	0.728073	0.559686
ENSMUSG00000000693_ENSMUSG00000000693_Loxl3_chr6:83034172-83052562	ENSMUSG00000000693	ENSMUSG00000000693	Loxl3	chr6:83034172-83052562	protein_coding	1.01076	1.13897	1.05474	1.68485	0.849568	1.69368	1.07976	1.18487	1.98462	1.59514	2.05056	1.40136
ENSMUSG00000000701_ENSMUSG00000000701_Tcl1b5_chr12:105176357-105181143	ENSMUSG00000000701	ENSMUSG00000000701	Tcl1b5	chr12:105176357-105181143	protein_coding	0	0	0	0	0	0	0	0	0	0	0	0
ENSMUSG00000000706_ENSMUSG00000000706_Btn1a1_chr13:23456991-23465901	ENSMUSG00000000706	ENSMUSG00000000706	Btn1a1	chr13:23456991-23465901	protein_coding	0	0	0	0	0	0	0	0	0	0	0	0
ENSMUSG00000000708_ENSMUSG00000000708_Kat2b_chr17:53566860-53672720	ENSMUSG00000000708	ENSMUSG00000000708	Kat2b	chr17:53566860-53672720	protein_coding	19.3375	14.5191	17.445	15.092	15.2434	12.8423	8.08445	6.68595	7.47648	10.4267	9.80388	9.41259
ENSMUSG00000000711_ENSMUSG00000000711_Rab5b_chr10:128677192-128696268	ENSMUSG00000000711	ENSMUSG00000000711	Rab5b	chr10:128677192-128696268	protein_coding	40.9275	42.5739	42.3539	44.3444	43.1212	42.8807	35.111	32.938	34.131	32.3244	32.2237	33.3726
ENSMUSG00000000724_ENSMUSG00000000724_Cryba1_chr11:77718614-77725283	ENSMUSG00000000724	ENSMUSG00000000724	Cryba1	chr11:77718614-77725283	protein_coding	0	0	0	0	0	0	0	0	0	0	0	0
ENSMUSG00000000730_ENSMUSG00000000730_Dnmt3l_chr10:78041946-78063622	ENSMUSG00000000730	ENSMUSG00000000730	Dnmt3l	chr10:78041946-78063622	protein_coding	0	0.0773839	0.495535	0.228162	0.162865	0.0772466	0.812627	1.16182	0.388166	0.610931	0.578352	0.45244
ENSMUSG00000000731_ENSMUSG00000000731_Aire_chr10:78030021-78043610	ENSMUSG00000000731	ENSMUSG00000000731	Aire	chr10:78030021-78043610	protein_coding	0	0	0	0	0.0272171	0	0	0	0	0	0	0
ENSMUSG00000000732_ENSMUSG00000000732_Icosl_chr10:78069359-78079525	ENSMUSG00000000732	ENSMUSG00000000732	Icosl	chr10:78069359-78079525	protein_coding	1.23562	1.23762	1.55159	2.16764	1.73786	1.59532	0.846183	1.01829	1.22823	1.0666	1.50229	1.16644
ENSMUSG00000000751_ENSMUSG00000000751_Rpa1_chr11:75298165-75348324	ENSMUSG00000000751	ENSMUSG00000000751	Rpa1	chr11:75298165-75348324	protein_coding	24.0009	22.3526	30.3882	24.4829	24.5461	20.381	6.21368	5.48273	6.4028	7.41834	7.75773	8.50954
ENSMUSG00000000753_ENSMUSG00000000753_Serpinf1_chr11:75409768-75422701	ENSMUSG00000000753	ENSMUSG00000000753	Serpinf1	chr11:75409768-75422701	protein_coding	52.318	51.5733	62.6914	70.8315	69.796	63.6069	46.8548	53.8866	47.3627	58.0808	50.286	50.8586
ENSMUSG00000000759_ENSMUSG00000000759_Tubgcp3_chr8:12614276-12672248	ENSMUSG00000000759	ENSMUSG00000000759	Tubgcp3	chr8:12614276-12672248	protein_coding	9.05732	8.77	8.57979	9.80861	8.93002	7.7894	7.01702	7.11815	8.79888	7.66992	8.83764	8.59418
ENSMUSG00000000766_ENSMUSG00000000766_Oprm1_chr10:6758505-7038198	ENSMUSG00000000766	ENSMUSG00000000766	Oprm1	chr10:6758505-7038198	protein_coding	0	0	0	0	0	0	0	0	0	0	0	0
ENSMUSG00000000776_ENSMUSG00000000776_Polr3d_chr14:70438747-70443471	ENSMUSG00000000776	ENSMUSG00000000776	Polr3d	chr14:70438747-70443471	protein_coding	7.79302	6.33401	7.72847	7.94672	7.5747	6.45101	10.1427	11.4228	9.80532	12.8911	11.1574	14.2825
ENSMUSG00000000782_ENSMUSG00000000782_Tcf7_chr11:52252370-52283014	ENSMUSG00000000782	ENSMUSG00000000782	Tcf7	chr11:52252370-52283014	protein_coding	0.366066	0.269885	0.32934	0.329558	0.645619	0.495431	0.231659	0.295743	0.1154	0.215707	0.221774	0.268551
ENSMUSG00000000787_ENSMUSG00000000787_Ddx3x_chrX:13280969-13294052	ENSMUSG00000000787	ENSMUSG00000000787	Ddx3x	chrX:13280969-13294052	protein_coding	51.5339	50.6821	44.243	50.5374	49.1985	47.9966	109.43	110.441	103.913	90.1804	94.2396	101.361
ENSMUSG00000000791_ENSMUSG00000000791_Il12rb1_chr8:70808448-70821424	ENSMUSG00000000791	ENSMUSG00000000791	Il12rb1	chr8:70808448-70821424	protein_coding	0	0	0.0211963	0.0259079	0.112659	0	0	0.0314109	0	0.124376	0.0941954	0
ENSMUSG00000000792_ENSMUSG00000000792_Slc5a5_chr8:70882888-70892757	ENSMUSG00000000792	ENSMUSG00000000792	Slc5a5	chr8:70882888-70892757	protein_coding	0	0.0257641	0	0	0.0275965	0	0.042856	0.0615559	0.127859	0.0243733	0.069221	0
ENSMUSG00000000794_ENSMUSG00000000794_Kcnn3_chr3:89520163-89667761	ENSMUSG00000000794	ENSMUSG00000000794	Kcnn3	chr3:89520163-89667761	protein_coding	0	0	0.0633284	0.0258015	0.0280493	0	0	0.0625645	0.0324891	0	0.0703568	0
ENSMUSG00000000804_ENSMUSG00000000804_Usp32_chr11:84984441-85140161	ENSMUSG00000000804	ENSMUSG00000000804	Usp32	chr11:84984441-85140161	protein_coding	7.42763	6.37507	4.52068	6.74919	6.45561	4.42201	11.468	8.8801	10.9243	7.17779	8.45306	7.19117
ENSMUSG00000000805_ENSMUSG00000000805_Car4_chr11:84957785-84966044	ENSMUSG00000000805	ENSMUSG00000000805	Car4	chr11:84957785-84966044	protein_coding	38.8655	44.7613	45.1854	41.4799	38.5151	36.4449	22.7738	25.1239	27.7207	36.9376	40.4758	30.2242
ENSMUSG00000000811_ENSMUSG00000000811_Txnrd3_chr6:89643987-89675529	ENSMUSG00000000811	ENSMUSG00000000811	Txnrd3	chr6:89643987-89675529	protein_coding	8.67005	9.66511	9.1902	7.97378	9.31074	9.157	2.78477	1.9748	2.51417	3.97105	3.85896	4.58675
ENSMUSG00000000817_ENSMUSG00000000817_Fasl_chr1:161780690-161788495	ENSMUSG00000000817	ENSMUSG00000000817	Fasl	chr1:161780690-161788495	protein_coding	0	0.040571	0	0	0.0434123	0.0405552	0	0	0	0	0.0362971	0
ENSMUSG00000000823_ENSMUSG00000000823_Znf512b_chr2:181582102-181592803	ENSMUSG00000000823	ENSMUSG00000000823	Znf512b	chr2:181582102-181592803	protein_coding	14.4421	9.75992	11.9808	14.8936	15.6159	14.6146	6.97123	6.33881	6.94009	9.30436	8.28574	8.23285
ENSMUSG00000000826_ENSMUSG00000000826_Dnajc5_chr2:181520484-181555133	ENSMUSG00000000826	ENSMUSG00000000826	Dnajc5	chr2:181520484-181555133	protein_coding	25.9905	25.631	25.0996	27.5048	26.8057	27.327	36.2075	33.6858	28.3167	36.2351	35.9296	36.0193
ENSMUSG00000000827_ENSMUSG00000000827_Tpd52l2_chr2:181497164-181517966	ENSMUSG00000000827	ENSMUSG00000000827	Tpd52l2	chr2:181497164-181517966	protein_coding	33.159	33.5662	34.8771	38.7745	34.8899	36.059	35.4902	36.4306	34.6152	41.9013	40.3591	39.4109
ENSMUSG00000000838_ENSMUSG00000000838_Fmr1_chrX:68678540-68717963	ENSMUSG00000000838	ENSMUSG00000000838	Fmr1	chrX:68678540-68717963	protein_coding	9.92349	10.7651	9.34985	10.7736	10.4408	10.1988	8.68387	7.69399	7.91116	9.2303	8.68882	8.37964
ENSMUSG00000000861_ENSMUSG00000000861_Bcl11a_chr11:24078055-24174123	ENSMUSG00000000861	ENSMUSG00000000861	Bcl11a	chr11:24078055-24174123	protein_coding	0.01434	0	0.0195843	0.0650972	0.0129987	0	0	0	0	0.0624679	0.0330673	0.472063
ENSMUSG00000000869_ENSMUSG00000000869_Il4_chr11:53602981-53618669	ENSMUSG00000000869	ENSMUSG00000000869	Il4	chr11:53602981-53618669	protein_coding	0	0	0.165039	0.204981	0.186794	0	0	0	0	0.398218	0	0
ENSMUSG00000000876_ENSMUSG00000000876_Pxmp4_chr2:154585757-154603708	ENSMUSG00000000876	ENSMUSG00000000876	Pxmp4	chr2:154585757-154603708	protein_coding	23.642	22.2536	23.6175	20.1685	20.9497	22.759	17.0506	17.5062	19.3554	15.0669	14.4974	16.4403
ENSMUSG00000000881_ENSMUSG00000000881_Dlg3_chrX:100767721-100818410	ENSMUSG00000000881	ENSMUSG00000000881	Dlg3	chrX:100767721-100818410	protein_coding	5.48654	4.70191	3.07379	4.22356	4.99781	4.9701	1.08903	1.16736	1.88945	1.93266	1.59446	2.55209
ENSMUSG00000000884_ENSMUSG00000000884_Gnb1l_chr16:18498767-18566679	ENSMUSG00000000884	ENSMUSG00000000884	Gnb1l	chr16:18498767-18566679	protein_coding	1.69549	1.13392	2.95167	2.29236	1.45458	1.52827	0.520068	0.862671	0.330047	0.507794	0.931841	0.440624
ENSMUSG00000000889_ENSMUSG00000000889_Dbh_chr2:27165232-27183200	ENSMUSG00000000889	ENSMUSG00000000889	Dbh	chr2:27165232-27183200	protein_coding	0	0	0	0	0	0	0	0	0	0	0	0
ENSMUSG00000000901_ENSMUSG00000000901_Mmp11_chr10:75923221-75932502	ENSMUSG00000000901	ENSMUSG00000000901	Mmp11	chr10:75923221-75932502	protein_coding	2.15049	1.95784	2.51325	2.6164	2.39791	2.3762	0.797383	0.627767	0.546724	0.719017	0.604762	0.557486
ENSMUSG00000000902_ENSMUSG00000000902_Smarcb1_chr10:75896768-75921617	ENSMUSG00000000902	ENSMUSG00000000902	Smarcb1	chr10:75896768-75921617	protein_coding	19.5456	20.5254	19.1349	18.3612	21.2969	17.5185	12.7821	13.4161	13.8538	18.6251	18.1385	19.5345
ENSMUSG00000000903_ENSMUSG00000000903_Vpreb3_chr10:75943056-75949657	ENSMUSG00000000903	ENSMUSG00000000903	Vpreb3	chr10:75943056-75949657	protein_coding	0	0	0.320074	0.164146	0.177953	0.166897	0.662818	0.591027	1.23609	0.126034	0	0.473
ENSMUSG00000000915_ENSMUSG00000000915_Hip1r_chr5:123973627-124003211	ENSMUSG00000000915	ENSMUSG00000000915	Hip1r	chr5:123973627-124003211	protein_coding	3.32572	3.08991	4.22314	3.73105	4.12176	4.17251	6.15154	9.03954	7.85626	4.2663	5.5405	5.37915
ENSMUSG00000000916_ENSMUSG00000000916_Nsun5_chr5:135369952-135376805	ENSMUSG00000000916	ENSMUSG00000000916	Nsun5	chr5:135369952-135376805	protein_coding	5.99912	6.23675	9.956	9.25076	6.20532	8.53774	12.2826	18.0242	11.4949	9.57309	12.4759	11.6445
ENSMUSG00000000934_ENSMUSG00000000934_Top1mt_chr15:75657034-75678800	ENSMUSG00000000934	ENSMUSG00000000934	Top1mt	chr15:75657034-75678800	protein_coding	10.6014	9.34207	11.1391	12.9823	11.7207	10.9083	7.24227	7.29453	6.04477	11.9519	8.91219	9.44296
ENSMUSG00000000938_ENSMUSG00000000938_Hoxa10_chr6:52231196-52240854	ENSMUSG00000000938	ENSMUSG00000000938	Hoxa10	chr6:52231196-52240854	protein_coding	0	0	0.0457868	0	0	0	0	0	0	0	0	0
ENSMUSG00000000942_ENSMUSG00000000942_Hoxa4_chr6:52189670-52191753	ENSMUSG00000000942	ENSMUSG00000000942	Hoxa4	chr6:52189670-52191753	protein_coding	6.15173	6.47	7.43131	6.91416	7.78315	6.21251	4.73818	5.17735	4.75751	4.91594	5.28732	3.57006
ENSMUSG00000000948_ENSMUSG00000000948_Snrpn_chr7:59982494-60140219	ENSMUSG00000000948	ENSMUSG00000000948	Snrpn	chr7:59982494-60140219	protein_coding	16.2866	15.848	14.52	12.7294	15.455	13.409	11.1752	8.95188	10.9499	11.4656	11.6684	9.86869
ENSMUSG00000000957_ENSMUSG00000000957_Mmp14_chr14:54431603-54441258	ENSMUSG00000000957	ENSMUSG00000000957	Mmp14	chr14:54431603-54441258	protein_coding	4.99364	4.89853	6.35762	8.92875	7.13031	7.68538	3.80433	3.32743	3.85654	5.35412	5.69906	6.11617
ENSMUSG00000000958_ENSMUSG00000000958_Slc7a7_chr14:54369443-54409472	ENSMUSG00000000958	ENSMUSG00000000958	Slc7a7	chr14:54369443-54409472	protein_coding	1.28476	1.37676	1.39989	1.35579	1.5124	1.01422	1.02339	1.1671	1.84154	1.8151	1.94541	1.5788
ENSMUSG00000000959_ENSMUSG00000000959_Oxa1l_chr14:54360840-54369669	ENSMUSG00000000959	ENSMUSG00000000959	Oxa1l	chr14:54360840-54369669	protein_coding	44.1641	39.8576	47.645	43.9514	43.3249	45.5819	34.7874	36.7258	34.4509	37.1522	32.2322	34.8149
ENSMUSG00000000976_ENSMUSG00000000976_Heatr6_chr11:83753695-83783754	ENSMUSG00000000976	ENSMUSG00000000976	Heatr6	chr11:83753695-83783754	protein_coding	2.7402	2.70527	3.26043	3.24874	3.59346	2.97323	3.3204	3.20324	2.80559	4.43815	2.97117	3.35195
ENSMUSG00000000982_ENSMUSG00000000982_Ccl3_chr11:83647843-83649355	ENSMUSG00000000982	ENSMUSG00000000982	Ccl3	chr11:83647843-83649355	protein_coding	0.147932	0	0	0	0.133447	0.249986	1.4455	0.740271	1.23608	1.531	3.23554	4.41815
ENSMUSG00000000983_ENSMUSG00000000983_Wfdc18_chr11:83709014-83711348	ENSMUSG00000000983	ENSMUSG00000000983	Wfdc18	chr11:83709014-83711348	protein_coding	0	0	0	0	0.105251	0	0	0	0	0	0	0
ENSMUSG00000001014_ENSMUSG00000001014_Icam4_chr9:21029372-21030531	ENSMUSG00000001014	ENSMUSG00000001014	Icam4	chr9:21029372-21030531	protein_coding	0.236409	0.100168	0.159851	0.0983333	0.320234	0.199809	0	0.355756	0.123605	0.188445	0.26774	0.235409
ENSMUSG00000001016_ENSMUSG00000001016_Ilf2_chr3:90476200-90488379	ENSMUSG00000001016	ENSMUSG00000001016	Ilf2	chr3:90476200-90488379	protein_coding	12.6214	11.7506	12.3609	11.6088	11.1724	10.6749	9.3301	9.18454	6.49466	12.0798	11.6855	11.4066
ENSMUSG00000001017_ENSMUSG00000001017_Chtop_chr3:90498955-90509498	ENSMUSG00000001017	ENSMUSG00000001017	Chtop	chr3:90498955-90509498	protein_coding	25.7465	27.8161	28.8121	29.6336	30.5911	28.5265	31.6118	33.8635	29.4937	36.692	36.8471	37.0969
ENSMUSG00000001018_ENSMUSG00000001018_Snapin_chr3:90488025-90491033	ENSMUSG00000001018	ENSMUSG00000001018	Snapin	chr3:90488025-90491033	protein_coding	30.0697	30.3482	30.0621	27.3578	28.8712	27.3108	16.366	15.888	15.3781	19.8068	18.6465	18.9935
ENSMUSG00000001020_ENSMUSG00000001020_S100a4_chr3:90603769-90606045	ENSMUSG00000001020	ENSMUSG00000001020	S100a4	chr3:90603769-90606045	protein_coding	9.34445	10.8374	12.8238	16.2026	11.4395	15.7705	22.825	28.4625	23.5393	37.2133	35.3314	34.639
ENSMUSG00000001021_ENSMUSG00000001021_S100a3_chr3:90600214-90602702	ENSMUSG00000001021	ENSMUSG00000001021	S100a3	chr3:90600214-90602702	protein_coding	0.327399	0.13886	0.110214	0.272118	0.147586	0.138294	0.456541	0.981762	0.170871	0.781403	0.740345	0.814738
ENSMUSG00000001023_ENSMUSG00000001023_S100a5_chr3:90608522-90611780	ENSMUSG00000001023	ENSMUSG00000001023	S100a5	chr3:90608522-90611780	protein_coding	0	0	0	0	0	0	0	0	0	0.300625	0	0
ENSMUSG00000001025_ENSMUSG00000001025_S100a6_chr3:90612893-90614414	ENSMUSG00000001025	ENSMUSG00000001025	S100a6	chr3:90612893-90614414	protein_coding	42.9507	51.9083	54.4763	60.529	50.0817	45.016	95.4818	84.1029	94.2237	104.19	129.874	114.761
ENSMUSG00000001027_ENSMUSG00000001027_Scn4a_chr11:106318591-106349389	ENSMUSG00000001027	ENSMUSG00000001027	Scn4a	chr11:106318591-106349389	protein_coding	0.389217	0.636188	1.16072	1.40597	1.17609	0.515907	0.895417	1.71964	0.940006	0.716805	0.737509	0.65943
ENSMUSG00000001027_ENSMUSG00000001027_Scn4a_chr11:106349454-106353288	ENSMUSG00000001027	ENSMUSG00000001027	Scn4a	chr11:106349454-106353288	protein_coding	0.348054	0	0.230535	0.864903	0	0.293536	0.719682	0.686118	0.721749	1.09951	1.04297	1.03806
ENSMUSG00000001029_ENSMUSG00000001029_Icam2_chr11:106377655-106388075	ENSMUSG00000001029	ENSMUSG00000001029	Icam2	chr11:106377655-106388075	protein_coding	9.1404	9.49786	9.67644	10.8171	13.2362	13.025	10.9161	8.60685	8.29241	12.8109	16.7799	15.6473
ENSMUSG00000001034_ENSMUSG00000001034_Mapk7_chr11:61488811-61494406	ENSMUSG00000001034	ENSMUSG00000001034	Mapk7	chr11:61488811-61494406	protein_coding	2.49653	3.57405	3.58371	4.56278	4.17858	2.99823	2.63794	2.94244	2.59229	4.32946	5.4986	3.75031
ENSMUSG00000001036_ENSMUSG00000001036_Epn2_chr11:61517248-61579687	ENSMUSG00000001036	ENSMUSG00000001036	Epn2	chr11:61517248-61579687	protein_coding	13.0544	14.0706	14.582	17.6439	17.9461	15.5511	7.76312	6.22827	6.97558	9.39778	13.1562	10.6572
ENSMUSG00000001039_ENSMUSG00000001039_B9d1_chr11:61505143-61512931	ENSMUSG00000001039	ENSMUSG00000001039	B9d1	chr11:61505143-61512931	protein_coding	3.04427	2.14076	2.27758	2.2553	3.14142	3.24044	1.68263	2.58198	2.5892	2.58027	3.65155	2.40237
ENSMUSG00000001052_ENSMUSG00000001052_Sec24b_chr3:129982758-130061553	ENSMUSG00000001052	ENSMUSG00000001052	Sec24b	chr3:129982758-130061553	protein_coding	23.3568	22.1726	29.0072	24.6007	23.9028	23.9306	17.2475	17.0896	16.4137	21.9917	19.8966	24.51
ENSMUSG00000001053_ENSMUSG00000001053_N4bp3_chr11:51643062-51650842	ENSMUSG00000001053	ENSMUSG00000001053	N4bp3	chr11:51643062-51650842	protein_coding	5.75517	5.06874	5.95534	6.83782	7.2277	4.52705	5.22273	5.87495	3.20836	8.22551	10.0839	7.71903
ENSMUSG00000001054_ENSMUSG00000001054_Rmnd5b_chr11:51623670-51635896	ENSMUSG00000001054	ENSMUSG00000001054	Rmnd5b	chr11:51623670-51635896	protein_coding	7.99093	6.33091	7.3309	8.66511	8.68948	7.74341	8.58784	10.1998	8.53557	8.53891	9.09083	9.19621
ENSMUSG00000001056_ENSMUSG00000001056_Nhp2_chr11:51619734-51623714	ENSMUSG00000001056	ENSMUSG00000001056	Nhp2	chr11:51619734-51623714	protein_coding	24.8635	19.6774	25.5111	23.8587	25.0613	23.4028	31.8742	33.0019	26.7959	34.3957	34.8502	36.6756
ENSMUSG00000001076_ENSMUSG00000001076_C1ql4_chr15:99084685-99087817	ENSMUSG00000001076	ENSMUSG00000001076	C1ql4	chr15:99084685-99087817	protein_coding	0	0	0	0	0	0	0	0	0	0	0	0
ENSMUSG00000001082_ENSMUSG00000001082_Mfsd10_chr5:34633641-34637212	ENSMUSG00000001082	ENSMUSG00000001082	Mfsd10	chr5:34633641-34637212	protein_coding	7.31182	4.54862	9.69282	9.2756	7.6345	8.83794	6.91031	4.97223	3.69814	9.74428	9.09313	8.19593
ENSMUSG00000001089_ENSMUSG00000001089_Luzp1_chr4:136469760-136554780	ENSMUSG00000001089	ENSMUSG00000001089	Luzp1	chr4:136469760-136554780	protein_coding	7.27222	7.32747	6.23397	5.66944	5.67408	5.88678	9.12898	9.00893	7.39223	9.72931	10.5367	9.68184
ENSMUSG00000001095_ENSMUSG00000001095_Slc13a2_chr11:78397086-78422217	ENSMUSG00000001095	ENSMUSG00000001095	Slc13a2	chr11:78397086-78422217	protein_coding	0.112756	0.0317937	0.0256086	0	0.0340409	0.0317919	0	0	0	0.0300636	0	0
ENSMUSG00000001098_ENSMUSG00000001098_Kctd10_chr5:114363566-114380515	ENSMUSG00000001098	ENSMUSG00000001098	Kctd10	chr5:114363566-114380515	protein_coding	16.2829	15.9215	19.325	21.7844	23.242	16.6563	23.3672	22.3837	21.7652	27.5472	31.0011	27.5642
ENSMUSG00000001100_ENSMUSG00000001100_Poldip2_chr11:78512192-78522736	ENSMUSG00000001100	ENSMUSG00000001100	Poldip2	chr11:78512192-78522736	protein_coding	73.6147	73.3709	77.0822	80.2806	84.5471	85.2188	92.544	90.7452	96.2525	85.1925	79.965	80.9671
ENSMUSG00000001103_ENSMUSG00000001103_Sebox_chr11:78503448-78505081	ENSMUSG00000001103	ENSMUSG00000001103	Sebox	chr11:78503448-78505081	protein_coding	0	0	0	0	0	0	0	0	0	0	0	0
ENSMUSG00000001105_ENSMUSG00000001105_Ift20_chr11:78536360-78541737	ENSMUSG00000001105	ENSMUSG00000001105	Ift20	chr11:78536360-78541737	protein_coding	39.0674	40.4427	38.3561	40.8935	37.5426	38.2298	41.9001	39.2519	43.4839	30.8377	34.7142	33.3168
ENSMUSG00000001119_ENSMUSG00000001119_Col6a1_chr10:76708791-76726168	ENSMUSG00000001119	ENSMUSG00000001119	Col6a1	chr10:76708791-76726168	protein_coding	31.3892	31.873	36.7429	46.9107	41.9934	38.0185	32.496	29.9511	33.3295	39.716	40.6618	35.0159
ENSMUSG00000001120_ENSMUSG00000001120_Pcbp3_chr10:76761856-76961887	ENSMUSG00000001120	ENSMUSG00000001120	Pcbp3	chr10:76761856-76961887	protein_coding	2.48494	2.97819	3.6314	2.85268	2.072	2.14354	1.72777	2.65599	2.14193	3.94667	4.11222	3.6915
ENSMUSG00000001123_ENSMUSG00000001123_Lgals9_chr11:78962973-78984946	ENSMUSG00000001123	ENSMUSG00000001123	Lgals9	chr11:78962973-78984946	protein_coding	16.11	16.7112	19.0105	20.3823	23.2366	19.7406	10.9818	11.243	9.15284	14.9735	15.2367	15.2607
ENSMUSG00000001127_ENSMUSG00000001127_Araf_chrX:20797813-20860519	ENSMUSG00000001127	ENSMUSG00000001127	Araf	chrX:20797813-20860519	protein_coding	28.4478	27.9609	34.6146	36.8578	31.1823	33.1372	24.8707	27.4593	25.5306	21.572	23.7992	22.8346
ENSMUSG00000001128_ENSMUSG00000001128_Cfp_chrX:20925453-20931555	ENSMUSG00000001128	ENSMUSG00000001128	Cfp	chrX:20925453-20931555	protein_coding	6.55085	5.07222	6.58519	11.43	6.64058	10.1226	6.51845	5.84427	5.40816	6.7742	7.50043	7.83835
ENSMUSG00000001131_ENSMUSG00000001131_Timp1_chrX:20870165-20874735	ENSMUSG00000001131	ENSMUSG00000001131	Timp1	chrX:20870165-20874735	protein_coding	0.611958	1.09523	0.827236	0.814488	1.25229	1.15746	5.44233	5.22527	4.92283	9.94976	17.8915	19.7134
ENSMUSG00000001134_ENSMUSG00000001134_Uxt_chrX:20941721-20962017	ENSMUSG00000001134	ENSMUSG00000001134	Uxt	chrX:20941721-20962017	protein_coding	25.7488	28.3905	30.7133	28.5563	22.1744	26.0242	35.5157	33.9558	34.9232	29.6366	29.1119	28.3144
ENSMUSG00000001138_ENSMUSG00000001138_Cnnm3_chr1:36511866-36528237	ENSMUSG00000001138	ENSMUSG00000001138	Cnnm3	chr1:36511866-36528237	protein_coding	7.50355	5.94129	10.0731	9.11372	8.44772	7.69879	3.25266	4.61121	3.89333	5.09416	4.23892	3.45913
ENSMUSG00000001143_ENSMUSG00000001143_Lman2l_chr1:36422064-36445271	ENSMUSG00000001143	ENSMUSG00000001143	Lman2l	chr1:36422064-36445271	protein_coding	13.2162	12.6539	13.993	15.3344	13.456	14.3598	16.6742	16.4403	18.6414	15.0615	14.3952	14.373
ENSMUSG00000001150_ENSMUSG00000001150_Mcm3ap_chr10:76468970-76515856	ENSMUSG00000001150	ENSMUSG00000001150	Mcm3ap	chr10:76468970-76515856	protein_coding	4.7668	4.74533	4.84171	4.89146	5.01486	4.8964	4.0094	3.74963	3.83505	4.31137	4.4576	4.34919
ENSMUSG00000001151_ENSMUSG00000001151_Pcnt_chr10:76351253-76442912	ENSMUSG00000001151	ENSMUSG00000001151	Pcnt	chr10:76351253-76442912	protein_coding	2.11688	2.39108	2.59478	3.03277	2.68533	2.49849	1.66666	1.92652	1.62536	1.88765	1.93509	1.8793
ENSMUSG00000001155_ENSMUSG00000001155_Ftcd_chr10:76575647-76590338	ENSMUSG00000001155	ENSMUSG00000001155	Ftcd	chr10:76575647-76590338	protein_coding	0	0.0258973	0	0	0.027739	0	0	0	0.0321297	0	0	0
ENSMUSG00000001156_ENSMUSG00000001156_Mxd1_chr6:86647043-86669159	ENSMUSG00000001156	ENSMUSG00000001156	Mxd1	chr6:86647043-86669159	protein_coding	2.94036	3.36743	3.15026	3.49012	3.30583	3.63692	1.91276	1.59978	1.93416	1.84731	2.4679	3.18992
ENSMUSG00000001157_ENSMUSG00000001157_Gmcl1_chr6:86691767-86733378	ENSMUSG00000001157	ENSMUSG00000001157	Gmcl1	chr6:86691767-86733378	protein_coding	4.20266	4.7641	4.30405	5.21203	5.26762	4.89303	2.44985	2.99866	3.0507	3.17428	3.73342	3.10133
ENSMUSG00000001158_ENSMUSG00000001158_Snrnp27_chr6:86675220-86684522	ENSMUSG00000001158	ENSMUSG00000001158	Snrnp27	chr6:86675220-86684522	protein_coding	37.5148	37.9502	38.6465	36.8862	37.2008	35.7769	38.984	40.0605	40.2888	37.2637	35.3034	36.2208
ENSMUSG00000001166_ENSMUSG00000001166_Oas1c_chr5:120800193-120812514	ENSMUSG00000001166	ENSMUSG00000001166	Oas1c	chr5:120800193-120812514	protein_coding	0.516957	0.370119	0.460509	0.530115	0.576207	0.605442	0.111849	0.120444	0.150823	0.0636095	0.287393	0.198121
ENSMUSG00000001168_ENSMUSG00000001168_Oas1h_chr5:120861420-120873512	ENSMUSG00000001168	ENSMUSG00000001168	Oas1h	chr5:120861420-120873512	protein_coding	0	0	0	0	0	0	0	0	0	0	0	0
ENSMUSG00000001173_ENSMUSG00000001173_Ocrl_chrX:47912386-47965868	ENSMUSG00000001173	ENSMUSG00000001173	Ocrl	chrX:47912386-47965868	protein_coding	3.75405	4.18087	3.77585	4.15211	3.89004	3.42562	2.30587	2.86463	2.20273	2.48136	2.92477	3.18117
ENSMUSG00000001175_ENSMUSG00000001175_Calm1_chr12:100199434-100209806	ENSMUSG00000001175	ENSMUSG00000001175	Calm1	chr12:100199434-100209806	protein_coding	100.015	101.549	125.828	105.607	136.404	120.355	190.278	176.479	159.901	200.796	185.677	176.518
ENSMUSG00000001211_ENSMUSG00000001211_Agpat3_chr10:78269177-78352489	ENSMUSG00000001211	ENSMUSG00000001211	Agpat3	chr10:78269177-78352489	protein_coding	225.453	221.487	264.857	229.28	239.654	239.768	246.727	261.059	267.034	261.989	246.546	240.025
ENSMUSG00000001225_ENSMUSG00000001225_Slc26a3_chr12:31390870-31473917	ENSMUSG00000001225	ENSMUSG00000001225	Slc26a3	chr12:31390870-31473917	protein_coding	0	0	0.0418455	0.0345719	0.0751556	0.0350981	0	0.0418885	0	0	0	0
ENSMUSG00000001227_ENSMUSG00000001227_Sema6b_chr17:56123084-56140343	ENSMUSG00000001227	ENSMUSG00000001227	Sema6b	chr17:56123084-56140343	protein_coding	4.64091	4.41201	5.61033	4.60445	5.08826	4.78846	2.61279	3.4526	2.72522	4.84456	6.25042	6.30946
ENSMUSG00000001228_ENSMUSG00000001228_Uhrf1_chr17:56303320-56323486	ENSMUSG00000001228	ENSMUSG00000001228	Uhrf1	chr17:56303320-56323486	protein_coding	1.86478	2.01594	2.51891	2.7152	2.37511	2.54508	0.391735	0.694451	0.582958	1.22196	1.36657	1.40749
ENSMUSG00000001229_ENSMUSG00000001229_Dpp9_chr17:56186681-56218889	ENSMUSG00000001229	ENSMUSG00000001229	Dpp9	chr17:56186681-56218889	protein_coding	5.49796	5.49871	6.88442	6.96725	6.86979	5.35191	9.09791	7.20684	6.92972	8.63935	10.6319	8.70607
ENSMUSG00000001240_ENSMUSG00000001240_Ramp2_chr11:101246027-101259546	ENSMUSG00000001240	ENSMUSG00000001240	Ramp2	chr11:101246027-101259546	protein_coding	45.0054	35.6315	44.6639	42.6125	45.5662	35.7835	18.2703	23.7118	17.9165	30.4196	30.9886	27.6691
ENSMUSG00000001247_ENSMUSG00000001247_Lsr_chr7:30957776-30983169	ENSMUSG00000001247	ENSMUSG00000001247	Lsr	chr7:30957776-30983169	protein_coding	0.226865	0.239316	0.199858	0.337824	0.205442	0.159604	0.17192	0.228972	0.0937887	0.0782876	0.290062	0.243805
ENSMUSG00000001248_ENSMUSG00000001248_Gramd1a_chr7:31130126-31151050	ENSMUSG00000001248	ENSMUSG00000001248	Gramd1a	chr7:31130126-31151050	protein_coding	14.7406	15.0886	16.4538	19.1782	18.7097	19.1569	7.65736	8.25706	8.21939	12.1143	11.2545	12.7855
ENSMUSG00000001249_ENSMUSG00000001249_Hpn_chr7:31098724-31115290	ENSMUSG00000001249	ENSMUSG00000001249	Hpn	chr7:31098724-31115290	protein_coding	1.26122	0.565725	0.847078	1.07792	0.87646	0.307318	0.21018	0.308959	0.61362	0.659185	0.228828	0.238758
ENSMUSG00000001260_ENSMUSG00000001260_Gabrg1_chr5:70751046-70842617	ENSMUSG00000001260	ENSMUSG00000001260	Gabrg1	chr5:70751046-70842617	protein_coding	0	0	0	0.0151414	0	0	0	0	0	0	0	0
ENSMUSG00000001270_ENSMUSG00000001270_Ckb_chr12:111669354-111672338	ENSMUSG00000001270	ENSMUSG00000001270	Ckb	chr12:111669354-111672338	protein_coding	12.6429	8.66024	13.9946	17.8006	17.5714	11.628	9.19296	10.1445	8.60453	38.7629	35.8904	30.2534
ENSMUSG00000001280_ENSMUSG00000001280_Sp1_chr15:102406142-102436404	ENSMUSG00000001280	ENSMUSG00000001280	Sp1	chr15:102406142-102436404	protein_coding	7.40652	7.1609	6.83171	7.92483	7.47208	7.53817	5.90249	4.93666	5.11198	6.04053	6.5043	11.2045
ENSMUSG00000001281_ENSMUSG00000001281_Itgb7_chr15:102215994-102231935	ENSMUSG00000001281	ENSMUSG00000001281	Itgb7	chr15:102215994-102231935	protein_coding	2.25096	1.44929	2.58764	1.62371	1.82595	1.96091	0.732461	1.18776	0.528737	1.317	1.55213	1.473
ENSMUSG00000001285_ENSMUSG00000001285_Myg1_chr15:102331708-102338139	ENSMUSG00000001285	ENSMUSG00000001285	Myg1	chr15:102331708-102338139	protein_coding	25.8295	21.4352	27.3811	23.8192	31.8023	19.8015	12.1496	17.0051	14.6097	18.3121	15.185	16.3559
ENSMUSG00000001288_ENSMUSG00000001288_Rarg_chr15:102234937-102257517	ENSMUSG00000001288	ENSMUSG00000001288	Rarg	chr15:102234937-102257517	protein_coding	7.97283	8.5089	11.2567	11.7619	12.8284	9.34862	3.82087	4.80995	3.97179	3.92927	3.71596	4.28757
ENSMUSG00000001289_ENSMUSG00000001289_Pfdn5_chr15:102326115-102331873	ENSMUSG00000001289	ENSMUSG00000001289	Pfdn5	chr15:102326115-102331873	protein_coding	109.496	96.5108	115.963	128.58	112.736	112.419	95.4097	86.5915	96.3321	103.359	101.346	109.358
ENSMUSG00000001300_ENSMUSG00000001300_Efnb2_chr8:8617433-8660773	ENSMUSG00000001300	ENSMUSG00000001300	Efnb2	chr8:8617433-8660773	protein_coding	4.49226	4.09394	4.41765	4.71255	4.41457	4.22503	2.52219	2.11779	2.02385	4.77406	3.56172	3.35142
ENSMUSG00000001305_ENSMUSG00000001305_Rrp15_chr1:186720977-186749358	ENSMUSG00000001305	ENSMUSG00000001305	Rrp15	chr1:186720977-186749358	protein_coding	7.37678	6.17222	7.96141	6.77702	6.91248	7.10284	14.2974	14.6181	13.4308	17.3514	17.0915	17.6885
ENSMUSG00000001313_ENSMUSG00000001313_Rnd2_chr11:101464998-101471853	ENSMUSG00000001313	ENSMUSG00000001313	Rnd2	chr11:101464998-101471853	protein_coding	2.02367	1.96717	2.16432	2.53039	1.94043	2.26235	1.67965	1.3349	1.3972	1.44868	2.11677	1.71356
ENSMUSG00000001323_ENSMUSG00000001323_Srr_chr11:74906358-74925948	ENSMUSG00000001323	ENSMUSG00000001323	Srr	chr11:74906358-74925948	protein_coding	20.4909	21.5302	17.4535	18.4844	16.322	18.4643	16.253	15.2517	15.7705	15.3401	13.739	15.9379
ENSMUSG00000001333_ENSMUSG00000001333_Sync_chr4:129287616-129308559	ENSMUSG00000001333	ENSMUSG00000001333	Sync	chr4:129287616-129308559	protein_coding	0.615492	0.705098	0.737592	1.51759	1.04505	0.802065	0.444272	0.610533	0.226751	0.324974	0.346946	0.584903
ENSMUSG00000001334_ENSMUSG00000001334_Fndc5_chr4:129136998-129144593	ENSMUSG00000001334	ENSMUSG00000001334	Fndc5	chr4:129136998-129144593	protein_coding	1.00525	0.658257	0.839993	2.54001	1.73311	2.13956	1.2316	1.47412	1.36097	1.0118	0.810494	0.678562
ENSMUSG00000001348_ENSMUSG00000001348_Acp5_chr9:22126730-22135746	ENSMUSG00000001348	ENSMUSG00000001348	Acp5	chr9:22126730-22135746	protein_coding	89.047	90.7239	107.529	134.928	140.588	137.831	104.653	102.944	113.393	85.7411	76.0827	84.2341
ENSMUSG00000001349_ENSMUSG00000001349_Cnn1_chr9:22099280-22109630	ENSMUSG00000001349	ENSMUSG00000001349	Cnn1	chr9:22099280-22109630	protein_coding	0.498551	0.486617	0.496428	0.73492	0.486255	0.486576	0.808871	1.27785	0.44252	0.736181	0.66792	0.649612
ENSMUSG00000001366_ENSMUSG00000001366_Fbxo9_chr9:78081498-78109065	ENSMUSG00000001366	ENSMUSG00000001366	Fbxo9	chr9:78081498-78109065	protein_coding	32.9694	32.3335	35.8032	36.4232	34.0257	33.4306	38.2043	33.9168	33.9515	35.0869	29.9377	36.6417
ENSMUSG00000001376_ENSMUSG00000001376_Ccdc132_chr6:3498392-3603531	ENSMUSG00000001376	ENSMUSG00000001376	Ccdc132	chr6:3498392-3603531	protein_coding	5.91656	5.39949	5.40348	5.25479	5.09173	4.96301	6.16318	5.28334	6.03702	5.78692	6.34367	6.55987
ENSMUSG00000001379_ENSMUSG00000001379_Apbb3_chr18:36671159-36679366	ENSMUSG00000001379	ENSMUSG00000001379	Apbb3	chr18:36671159-36679366	protein_coding	4.38008	4.27293	5.17344	5.32457	5.66571	4.87655	4.33455	4.78124	4.96852	4.50315	4.19573	4.7204
ENSMUSG00000001380_ENSMUSG00000001380_Hars_chr18:36766529-36783205	ENSMUSG00000001380	ENSMUSG00000001380	Hars	chr18:36766529-36783205	protein_coding	20.6687	18.7082	22.1199	23.5006	22.7174	22.5208	30.7477	30.0154	26.6048	31.4143	28.544	34.5538
ENSMUSG00000001383_ENSMUSG00000001383_Zmat2_chr18:36793922-36799660	ENSMUSG00000001383	ENSMUSG00000001383	Zmat2	chr18:36793922-36799660	protein_coding	16.2912	17.9197	16.7694	17.2781	17.5356	16.4467	16.5672	18.2425	15.9008	18.2993	18.151	18.4076
ENSMUSG00000001403_ENSMUSG00000001403_Ube2c_chr2:164769897-164778822	ENSMUSG00000001403	ENSMUSG00000001403	Ube2c	chr2:164769897-164778822	protein_coding	1.00458	1.47613	1.86452	2.73234	1.38882	1.87726	0.382734	0.330418	0.569548	0.635157	0.601896	1.06321
ENSMUSG00000001415_ENSMUSG00000001415_Smg5_chr3:88336259-88362337	ENSMUSG00000001415	ENSMUSG00000001415	Smg5	chr3:88336259-88362337	protein_coding	12.1425	10.0359	12.9272	13.201	12.4046	10.984	18.9122	22.4626	18.8023	16.8731	17.6762	15.6667
ENSMUSG00000001416_ENSMUSG00000001416_Cct3_chr3:88297115-88321767	ENSMUSG00000001416	ENSMUSG00000001416	Cct3	chr3:88297115-88321767	protein_coding	41.6434	40.8165	44.3542	38.3581	40.2484	36.4516	96.0752	103.598	106.108	88.6374	83.5716	96.9174
ENSMUSG00000001417_ENSMUSG00000001417_Rhbg_chr3:88242873-88287210	ENSMUSG00000001417	ENSMUSG00000001417	Rhbg	chr3:88242873-88287210	protein_coding	0	0.0723433	0.0567369	0.109522	0.20901	0.174923	0.105982	0.0483234	0	0.0765894	0.156621	0
ENSMUSG00000001418_ENSMUSG00000001418_0610031J06Rik_chr3:88325022-88331313	ENSMUSG00000001418	ENSMUSG00000001418	0610031J06Rik	chr3:88325022-88331313	protein_coding	48.5604	64.9112	64.2963	58.132	62.3671	60.9469	60.408	62.0199	59.6126	59.7013	52.1941	49.8271
ENSMUSG00000001419_ENSMUSG00000001419_Mef2d_chr3:88142371-88172086	ENSMUSG00000001419	ENSMUSG00000001419	Mef2d	chr3:88142371-88172086	protein_coding	16.4257	16.7956	23.1813	21.3042	22.3204	19.3098	38.9984	36.2667	37.1883	39.407	32.5941	35.9289
ENSMUSG00000001420_ENSMUSG00000001420_Tmem79_chr3:88328654-88334504	ENSMUSG00000001420	ENSMUSG00000001420	Tmem79	chr3:88328654-88334504	protein_coding	38.8622	35.4458	40.8302	30.1674	37.9083	32.9076	20.0384	18.4406	22.9083	14.0864	9.52412	9.24206
ENSMUSG00000001424_ENSMUSG00000001424_Snd1_chr6:28475138-28935162	ENSMUSG00000001424	ENSMUSG00000001424	Snd1	chr6:28475138-28935162	protein_coding	42.2378	28.6814	52.6632	43.8849	35.8439	34.128	36.3296	29.4777	30.9849	32.2037	34.2804	38.2356
ENSMUSG00000001435_ENSMUSG00000001435_Col18a1_chr10:77052177-77166548	ENSMUSG00000001435	ENSMUSG00000001435	Col18a1	chr10:77052177-77166548	protein_coding	5.09976	6.19529	7.05994	7.14881	6.6688	6.03791	7.07358	6.17034	6.76385	8.96558	9.97707	9.80191
ENSMUSG00000001436_ENSMUSG00000001436_Slc19a1_chr10:77032240-77061002	ENSMUSG00000001436	ENSMUSG00000001436	Slc19a1	chr10:77032240-77061002	protein_coding	15.9365	14.5166	16.9176	12.458	17.9676	12.9388	11.0758	8.16439	7.27585	14.5979	13.7162	14.6226
ENSMUSG00000001440_ENSMUSG00000001440_Kpnb1_chr11:97159713-97187881	ENSMUSG00000001440	ENSMUSG00000001440	Kpnb1	chr11:97159713-97187881	protein_coding	32.1451	36.346	35.4821	32.6031	33.509	31.9778	32.7347	33.3304	32.3082	39.5937	41.0627	44.2719
ENSMUSG00000001441_ENSMUSG00000001441_Npepps_chr11:97205841-97280638	ENSMUSG00000001441	ENSMUSG00000001441	Npepps	chr11:97205841-97280638	protein_coding	22.5181	23.5585	20.7702	22.6049	19.8452	23.6819	24.2062	23.1996	22.5683	24.8318	22.7181	23.4968
ENSMUSG00000001444_ENSMUSG00000001444_Tbx21_chr11:97098070-97115331	ENSMUSG00000001444	ENSMUSG00000001444	Tbx21	chr11:97098070-97115331	protein_coding	0.218004	0.522483	0.47042	0.605489	0.65818	0.614675	0.255484	0.550398	0.381173	0.494091	0.440246	0.181021
ENSMUSG00000001445_ENSMUSG00000001445_Mrpl10_chr11:97041559-97049213	ENSMUSG00000001445	ENSMUSG00000001445	Mrpl10	chr11:97041559-97049213	protein_coding	50.4318	46.6201	48.2346	46.6442	45.6219	41.6381	36.527	35.4171	44.3192	40.9252	39.3201	40.406
ENSMUSG00000001467_ENSMUSG00000001467_Cyp51_chr5:4081144-4104746	ENSMUSG00000001467	ENSMUSG00000001467	Cyp51	chr5:4081144-4104746	protein_coding	4.19445	4.17936	4.12717	3.71359	4.2164	3.38989	6.25608	7.35004	6.9087	3.15378	3.05179	3.74038
ENSMUSG00000001473_ENSMUSG00000001473_Tubb6_chr18:67390716-67402748	ENSMUSG00000001473	ENSMUSG00000001473	Tubb6	chr18:67390716-67402748	protein_coding	6.52107	6.64891	8.40009	8.23661	6.72521	7.27803	28.832	25.0119	21.6862	32.3858	40.6146	43.4013
ENSMUSG00000001493_ENSMUSG00000001493_Meox1_chr11:101877509-101894374	ENSMUSG00000001493	ENSMUSG00000001493	Meox1	chr11:101877509-101894374	protein_coding	1.8042	1.59568	1.59196	1.8448	1.89378	1.42199	2.10412	2.52505	1.63434	4.32876	3.97402	4.12651
ENSMUSG00000001494_ENSMUSG00000001494_Sost_chr11:101962457-101967015	ENSMUSG00000001494	ENSMUSG00000001494	Sost	chr11:101962457-101967015	protein_coding	0.0445746	0	0.0303506	0	0	0	0	0.0449852	0	0	0	0
ENSMUSG00000001496_ENSMUSG00000001496_Nkx2-1_chr12:56531957-56536908	ENSMUSG00000001496	ENSMUSG00000001496	Nkx2-1	chr12:56531957-56536908	protein_coding	0.0407211	0	0	0	0	0	0	0	0	0.0325674	0	0
ENSMUSG00000001497_ENSMUSG00000001497_Pax9_chr12:56691766-56712822	ENSMUSG00000001497	ENSMUSG00000001497	Pax9	chr12:56691766-56712822	protein_coding	0	0	0	0	0	0	0.0147363	0	0	0	0.029853	0
ENSMUSG00000001504_ENSMUSG00000001504_Irx2_chr13:72628819-72634196	ENSMUSG00000001504	ENSMUSG00000001504	Irx2	chr13:72628819-72634196	protein_coding	0.102915	0.287781	0.25728	0.978722	0.310849	0.852023	1.05084	0.0692999	0.959278	0.360386	0.20791	0.239283
ENSMUSG00000001506_ENSMUSG00000001506_Col1a1_chr11:94936223-94953042	ENSMUSG00000001506	ENSMUSG00000001506	Col1a1	chr11:94936223-94953042	protein_coding	61.6456	66.09	75.8541	92.2225	87.8491	80.1043	47.664	57.9223	61.2282	60.8591	60.2764	55.7619
ENSMUSG00000001507_ENSMUSG00000001507_Itga3_chr11:95044473-95076801	ENSMUSG00000001507	ENSMUSG00000001507	Itga3	chr11:95044473-95076801	protein_coding	3.32566	4.01745	3.44058	2.70241	3.17448	3.76223	3.30371	3.67139	2.09497	5.08413	7.75592	8.39638
ENSMUSG00000001508_ENSMUSG00000001508_Sgca_chr11:94962790-94976327	ENSMUSG00000001508	ENSMUSG00000001508	Sgca	chr11:94962790-94976327	protein_coding	1.80495	2.30553	3.00173	3.62428	4.27513	0.557905	2.47663	4.98977	1.28312	2.21861	2.23462	3.2494
ENSMUSG00000001510_ENSMUSG00000001510_Dlx3_chr11:95120088-95125296	ENSMUSG00000001510	ENSMUSG00000001510	Dlx3	chr11:95120088-95125296	protein_coding	0.0341076	0	0	0	0	0.0288511	0.119932	0.172255	0.178924	0.0818576	0.0774945	0.237905
ENSMUSG00000001517_ENSMUSG00000001517_Foxm1_chr6:128362966-128375893	ENSMUSG00000001517	ENSMUSG00000001517	Foxm1	chr6:128362966-128375893	protein_coding	0.760175	0.538337	0.362443	0.599065	0.480731	0.250976	0.447511	0.331652	0.780123	0.626996	1.07983	0.773797
ENSMUSG00000001518_ENSMUSG00000001518_Itfg2_chr6:128409443-128424931	ENSMUSG00000001518	ENSMUSG00000001518	Itfg2	chr6:128409443-128424931	protein_coding	5.36515	4.90455	6.73809	7.82226	5.49343	5.68122	5.05528	4.99169	5.76509	6.5217	6.28016	5.73722
ENSMUSG00000001520_ENSMUSG00000001520_Nrip2_chr6:128399295-128408932	ENSMUSG00000001520	ENSMUSG00000001520	Nrip2	chr6:128399295-128408932	protein_coding	5.68639	4.71005	6.03476	3.42728	4.77992	4.15516	1.23266	0.78362	1.50304	1.60084	1.22407	1.55467
ENSMUSG00000001521_ENSMUSG00000001521_Tulp3_chr6:128321139-128355851	ENSMUSG00000001521	ENSMUSG00000001521	Tulp3	chr6:128321139-128355851	protein_coding	4.89186	2.71481	3.60661	3.45364	3.5226	2.83758	3.43936	3.0689	1.9132	5.11281	5.00726	5.45363
ENSMUSG00000001524_ENSMUSG00000001524_Gtf2h4_chr17:35667729-35673739	ENSMUSG00000001524	ENSMUSG00000001524	Gtf2h4	chr17:35667729-35673739	protein_coding	9.43355	7.38403	10.5898	7.31988	10.3503	7.48122	5.12831	6.75292	6.23548	6.77918	6.52436	6.00625
ENSMUSG00000001525_ENSMUSG00000001525_Tubb5_chr17:35833925-35838306	ENSMUSG00000001525	ENSMUSG00000001525	Tubb5	chr17:35833925-35838306	protein_coding	25.0781	24.5885	30.4298	28.1837	30.1391	26.3959	37.7279	36.7327	31.9575	50.2389	50.3821	47.9936
ENSMUSG00000001542_ENSMUSG00000001542_Ell2_chr13:75707483-75772356	ENSMUSG00000001542	ENSMUSG00000001542	Ell2	chr13:75707483-75772356	protein_coding	7.44635	7.45864	6.92138	7.95331	7.46803	7.35949	20.2316	20.0245	21.0946	17.9945	18.8601	18.6112
ENSMUSG00000001552_ENSMUSG00000001552_Jup_chr11:100368957-100397763	ENSMUSG00000001552	ENSMUSG00000001552	Jup	chr11:100368957-100397763	protein_coding	26.0256	23.0243	32.1181	35.9873	40.0869	27.6096	28.4261	32.5058	23.321	41.8542	46.2346	41.0592
ENSMUSG00000001555_ENSMUSG00000001555_Fkbp10_chr11:100415696-100424824	ENSMUSG00000001555	ENSMUSG00000001555	Fkbp10	chr11:100415696-100424824	protein_coding	2.52759	2.25389	3.9388	3.89602	5.47359	3.05312	2.38401	2.78799	2.86667	3.93814	4.79692	3.86702
ENSMUSG00000001558_ENSMUSG00000001558_Klhl10_chr11:100441916-100457022	ENSMUSG00000001558	ENSMUSG00000001558	Klhl10	chr11:100441916-100457022	protein_coding	0.412022	0.348597	0.498688	0.190691	0.207254	0.154882	0.0321703	0	0	0	0	0
ENSMUSG00000001566_ENSMUSG00000001566_Mnx1_chr5:29473037-29478519	ENSMUSG00000001566	ENSMUSG00000001566	Mnx1	chr5:29473037-29478519	protein_coding	0	0	0	0	0	0	0	0	0	0	0	0
ENSMUSG00000001569_ENSMUSG00000001569_Nom1_chr5:29434663-29453506	ENSMUSG00000001569	ENSMUSG00000001569	Nom1	chr5:29434663-29453506	protein_coding	6.60828	6.29034	6.64591	7.46469	4.56658	8.02226	10.7445	8.91864	12.0137	8.59174	11.0824	10.0755
ENSMUSG00000001576_ENSMUSG00000001576_Ergic1_chr17:26561488-26656931	ENSMUSG00000001576	ENSMUSG00000001576	Ergic1	chr17:26561488-26656931	protein_coding	44.8874	47.5708	48.2901	32.2184	40.2652	39.43	52.6111	47.8386	54.5474	39.3051	34.6966	39.1816
ENSMUSG00000001583_ENSMUSG00000001583_Tnk1_chr11:69851004-69858730	ENSMUSG00000001583	ENSMUSG00000001583	Tnk1	chr11:69851004-69858730	protein_coding	0.128953	0.397281	0.0879063	0.0307866	0.200792	0.177003	0	0.293441	0.067652	0.0295554	0.151716	0.0991541
ENSMUSG00000001588_ENSMUSG00000001588_Acap1_chr11:69881566-69895539	ENSMUSG00000001588	ENSMUSG00000001588	Acap1	chr11:69881566-69895539	protein_coding	0.485278	0.486632	0.628764	0.518961	0.887087	0.44575	0.38159	0.22436	0.216447	0.830888	0.661081	0.879534
ENSMUSG00000001604_ENSMUSG00000001604_Tcea3_chr4:136247728-136274898	ENSMUSG00000001604	ENSMUSG00000001604	Tcea3	chr4:136247728-136274898	protein_coding	1.97993	1.54463	1.83018	1.84895	1.79358	0.939043	1.16786	1.92082	1.07995	1.01333	0.999061	0.474043
ENSMUSG00000001622_ENSMUSG00000001622_Csn3_chr5:87925578-87932665	ENSMUSG00000001622	ENSMUSG00000001622	Csn3	chr5:87925578-87932665	protein_coding	0	0	0	0	0	0	0	0	0	0	0	0
ENSMUSG00000001627_ENSMUSG00000001627_Ifrd1_chr12:40201566-40248504	ENSMUSG00000001627	ENSMUSG00000001627	Ifrd1	chr12:40201566-40248504	protein_coding	37.5496	31.6173	41.1591	40.0387	39.2285	37.5202	57.298	56.7404	48.8266	86.9153	93.6927	111.47
ENSMUSG00000001630_ENSMUSG00000001630_Stk38l_chr6:146724994-146778812	ENSMUSG00000001630	ENSMUSG00000001630	Stk38l	chr6:146724994-146778812	protein_coding	8.73062	8.63167	7.97072	9.60417	7.77495	8.21765	3.71684	3.93407	3.64904	5.69415	6.07143	6.52365
ENSMUSG00000001632_ENSMUSG00000001632_Brpf1_chr6:113307180-113324857	ENSMUSG00000001632	ENSMUSG00000001632	Brpf1	chr6:113307180-113324857	protein_coding	9.60302	9.73709	10.0503	10.3289	11.4859	10.2523	10.3636	9.67732	10.4942	11.9936	12.7683	12.6665
ENSMUSG00000001642_ENSMUSG00000001642_Akr1b3_chr6:34303933-34317497	ENSMUSG00000001642	ENSMUSG00000001642	Akr1b3	chr6:34303933-34317497	protein_coding	51.4571	41.5037	52.238	57.4972	49.6011	46.2271	68.9078	72.7861	62.5004	92.9189	95.9272	90.1298
ENSMUSG00000001655_ENSMUSG00000001655_Hoxc13_chr15:102921102-102928814	ENSMUSG00000001655	ENSMUSG00000001655	Hoxc13	chr15:102921102-102928814	protein_coding	0	0	0	0	0	0	0	0	0	0	0	0
ENSMUSG00000001656_ENSMUSG00000001656_Hoxc11_chr15:102954426-102957708	ENSMUSG00000001656	ENSMUSG00000001656	Hoxc11	chr15:102954426-102957708	protein_coding	0	0	0	0	0	0	0	0	0	0	0	0
ENSMUSG00000001657_ENSMUSG00000001657_Hoxc8_chr15:102990621-102994267	ENSMUSG00000001657	ENSMUSG00000001657	Hoxc8	chr15:102990621-102994267	protein_coding	1.62417	2.31227	2.02392	2.31037	1.97315	1.47431	1.42028	2.07974	1.57901	1.58417	1.49978	1.46044
ENSMUSG00000001661_ENSMUSG00000001661_Hoxc6_chr15:102998256-103011881	ENSMUSG00000001661	ENSMUSG00000001661	Hoxc6	chr15:102998256-103011881	protein_coding	9.38139	7.64426	9.58251	7.5349	7.02584	6.39553	3.46777	5.07228	5.6452	4.34891	3.30923	3.88826
ENSMUSG00000001663_ENSMUSG00000001663_Gstt1_chr10:75783812-75798584	ENSMUSG00000001663	ENSMUSG00000001663	Gstt1	chr10:75783812-75798584	protein_coding	29.6201	22.5444	34.1248	33.1969	33.0838	25.7389	14.1751	12.9085	10.6194	17.7036	15.1327	18.4736
ENSMUSG00000001665_ENSMUSG00000001665_Gstt3_chr10:75774114-75781414	ENSMUSG00000001665	ENSMUSG00000001665	Gstt3	chr10:75774114-75781414	protein_coding	5.99648	3.82215	4.59686	6.21908	4.47094	4.90715	0.910464	0.957409	1.07444	1.54733	1.21156	1.23423
ENSMUSG00000001666_ENSMUSG00000001666_Ddt_chr10:75771229-75773414	ENSMUSG00000001666	ENSMUSG00000001666	Ddt	chr10:75771229-75773414	protein_coding	133.564	103.39	126.849	136.715	128.499	136.644	158.548	169.811	180.309	151.434	146.515	144.494
ENSMUSG00000001670_ENSMUSG00000001670_Tat_chr8:109990436-109999803	ENSMUSG00000001670	ENSMUSG00000001670	Tat	chr8:109990436-109999803	protein_coding	0	0	0	0	0	0	0	0	0	0	0	0
ENSMUSG00000001672_ENSMUSG00000001672_Marveld3_chr8:109947913-109962203	ENSMUSG00000001672	ENSMUSG00000001672	Marveld3	chr8:109947913-109962203	protein_coding	0	0	0	0	0	0	0	0	0	0	0	0
ENSMUSG00000001674_ENSMUSG00000001674_Ddx18_chr1:121553834-121567989	ENSMUSG00000001674	ENSMUSG00000001674	Ddx18	chr1:121553834-121567989	protein_coding	8.84407	7.02433	8.56469	8.1778	9.29626	8.39635	10.1019	9.02512	10.5938	12.9983	13.2391	13.8371
ENSMUSG00000001687_ENSMUSG00000001687_Ubl3_chr5:148504630-148552789	ENSMUSG00000001687	ENSMUSG00000001687	Ubl3	chr5:148504630-148552789	protein_coding	36.442	36.1239	38.5973	34.901	37.5706	34.5989	47.2253	48.6032	48.7773	41.4631	38.0611	37.7784
ENSMUSG00000001700_ENSMUSG00000001700_Gramd3_chr18:56432131-56503792	ENSMUSG00000001700	ENSMUSG00000001700	Gramd3	chr18:56432131-56503792	protein_coding	3.62905	3.27428	3.58047	3.19673	3.09934	2.92358	5.05556	4.9571	4.78649	3.51145	3.69075	2.99623
ENSMUSG00000001707_ENSMUSG00000001707_Eef1e1_chr13:38645697-38659028	ENSMUSG00000001707	ENSMUSG00000001707	Eef1e1	chr13:38645697-38659028	protein_coding	6.52147	9.17866	8.08656	8.5163	7.97827	7.12424	17.3511	18.547	20.6827	19.2887	19.2535	22.9817
ENSMUSG00000001729_ENSMUSG00000001729_Akt1_chr12:112653820-112674884	ENSMUSG00000001729	ENSMUSG00000001729	Akt1	chr12:112653820-112674884	protein_coding	34.127	37.0153	47.0123	45.913	45.3185	42.9059	58.5363	54.0843	57.8076	62.4473	61.2614	61.8751
ENSMUSG00000001739_ENSMUSG00000001739_Cldn15_chr5:136966615-136975858	ENSMUSG00000001739	ENSMUSG00000001739	Cldn15	chr5:136966615-136975858	protein_coding	8.24162	7.90509	11.3813	9.86824	9.27009	8.29011	10.6039	8.85025	10.0279	14.0623	16.3675	16.6425
ENSMUSG00000001741_ENSMUSG00000001741_Il16_chr7:83642847-83745726	ENSMUSG00000001741	ENSMUSG00000001741	Il16	chr7:83642847-83745726	protein_coding	2.825	2.12211	2.62377	2.74333	2.47404	2.49472	0.466369	0.458988	0.350908	0.590656	0.737896	0.628476
ENSMUSG00000001750_ENSMUSG00000001750_Tcirg1_chr19:3896049-3907133	ENSMUSG00000001750	ENSMUSG00000001750	Tcirg1	chr19:3896049-3907133	protein_coding	12.4268	10.1424	13.9918	14.1306	12.3222	11.3256	6.44633	7.01864	8.19833	8.44903	7.57261	8.2421
ENSMUSG00000001751_ENSMUSG00000001751_Naglu_chr11:101070011-101077672	ENSMUSG00000001751	ENSMUSG00000001751	Naglu	chr11:101070011-101077672	protein_coding	5.56943	4.82688	5.37703	5.20038	5.61526	4.64802	2.69984	2.60139	2.8401	3.65972	2.98764	2.31654
ENSMUSG00000001755_ENSMUSG00000001755_Coasy_chr11:101082564-101086619	ENSMUSG00000001755	ENSMUSG00000001755	Coasy	chr11:101082564-101086619	protein_coding	40.498	37.9369	39.4599	46.9052	48.5198	52.0796	28.3897	29.46	36.3844	25.5242	22.7378	23.1382
ENSMUSG00000001761_ENSMUSG00000001761_Smo_chr6:29735693-29761365	ENSMUSG00000001761	ENSMUSG00000001761	Smo	chr6:29735693-29761365	protein_coding	5.68599	5.61295	6.46044	4.95171	5.74131	4.67278	1.43732	1.5016	1.51031	2.21043	1.8463	2.08149
ENSMUSG00000001763_ENSMUSG00000001763_Tspan33_chr6:29694221-29718559	ENSMUSG00000001763	ENSMUSG00000001763	Tspan33	chr6:29694221-29718559	protein_coding	0.140392	0.158392	0.223047	0.270398	0.211879	0.118738	0.0328532	0.188895	0.0981327	0.149685	0.175509	0.255429
ENSMUSG00000001767_ENSMUSG00000001767_Crnkl1_chr2:145917478-145935014	ENSMUSG00000001767	ENSMUSG00000001767	Crnkl1	chr2:145917478-145935014	protein_coding	4.15123	3.98418	3.49342	3.83924	3.96432	3.24427	4.30336	5.2575	3.67348	4.67539	3.96696	5.09073
ENSMUSG00000001768_ENSMUSG00000001768_Rin2_chr2:145784733-145887616	ENSMUSG00000001768	ENSMUSG00000001768	Rin2	chr2:145784733-145887616	protein_coding	10.3583	7.7228	8.74297	10.0719	9.7258	7.75297	3.46668	3.34151	3.10144	4.13805	4.41777	4.66132
ENSMUSG00000001773_ENSMUSG00000001773_Folh1_chr7:86719351-86775864	ENSMUSG00000001773	ENSMUSG00000001773	Folh1	chr7:86719351-86775864	protein_coding	0	0.0607186	0.0489163	0.0299037	0.0325063	0.0284534	0	0.108745	0	0	0.0271785	0.0357613
ENSMUSG00000001774_ENSMUSG00000001774_Chordc1_chr9:18292266-18314000	ENSMUSG00000001774	ENSMUSG00000001774	Chordc1	chr9:18292266-18314000	protein_coding	10.2446	10.6317	9.71771	10.4358	8.86403	8.7353	35.3056	39.4822	36.847	21.6601	23.7411	21.531
ENSMUSG00000001783_ENSMUSG00000001783_D10Wsu52e_chr10:85938636-85957823	ENSMUSG00000001783	ENSMUSG00000001783	D10Wsu52e	chr10:85938636-85957823	protein_coding	47.6915	42.959	49.8591	49.4404	50.4606	44.0821	29.4763	28.5732	29.5902	43.5932	40.5759	40.6681
ENSMUSG00000001785_ENSMUSG00000001785_Pwp1_chr10:85871830-85889096	ENSMUSG00000001785	ENSMUSG00000001785	Pwp1	chr10:85871830-85889096	protein_coding	7.00657	6.2985	6.94389	5.56366	6.34316	6.17519	5.83348	6.21754	6.4511	8.72617	7.09504	9.76612
ENSMUSG00000001786_ENSMUSG00000001786_Fbxo7_chr10:86021971-86051873	ENSMUSG00000001786	ENSMUSG00000001786	Fbxo7	chr10:86021971-86051873	protein_coding	9.30579	8.97788	8.18215	10.0848	9.54643	9.81267	4.51631	4.81242	3.23398	4.56446	3.30524	4.45506
ENSMUSG00000001794_ENSMUSG00000001794_Capns1_chr7:30186941-30195164	ENSMUSG00000001794	ENSMUSG00000001794	Capns1	chr7:30186941-30195164	protein_coding	247.121	226.306	283.802	302.349	285.769	271.757	202.082	204.117	200.191	290.433	259.111	251.027
ENSMUSG00000001802_ENSMUSG00000001802_Lrp3_chr7:35200026-35215370	ENSMUSG00000001802	ENSMUSG00000001802	Lrp3	chr7:35200026-35215370	protein_coding	9.74141	8.66366	10.5252	12.5079	12.103	11.5661	10.8611	8.85321	13.7882	12.4793	12.7784	11.5521
ENSMUSG00000001804_ENSMUSG00000001804_Dsg4_chr18:20436174-20471821	ENSMUSG00000001804	ENSMUSG00000001804	Dsg4	chr18:20436174-20471821	protein_coding	0	0	0	0	0	0	0	0	0	0	0	0
ENSMUSG00000001815_ENSMUSG00000001815_Evx2_chr2:74652996-74659861	ENSMUSG00000001815	ENSMUSG00000001815	Evx2	chr2:74652996-74659861	protein_coding	0	0	0	0	0	0	0	0	0	0	0	0
ENSMUSG00000001819_ENSMUSG00000001819_Hoxd13_chr2:74668309-74671599	ENSMUSG00000001819	ENSMUSG00000001819	Hoxd13	chr2:74668309-74671599	protein_coding	0	0	0	0	0	0	0	0	0	0	0	0
ENSMUSG00000001823_ENSMUSG00000001823_Hoxd12_chr2:74674928-74677706	ENSMUSG00000001823	ENSMUSG00000001823	Hoxd12	chr2:74674928-74677706	protein_coding	0	0	0	0	0	0	0	0	0	0	0	0
ENSMUSG00000001827_ENSMUSG00000001827_Folr1_chr7:101858330-101870788	ENSMUSG00000001827	ENSMUSG00000001827	Folr1	chr7:101858330-101870788	protein_coding	0.266818	0.480903	0	0	0.39711	0.185786	0.153796	0.110322	0.579626	0.2629	0.249012	0
ENSMUSG00000001829_ENSMUSG00000001829_Clpb_chr7:101663632-101790168	ENSMUSG00000001829	ENSMUSG00000001829	Clpb	chr7:101663632-101790168	protein_coding	108.617	92.6392	126.179	119.082	114.635	106.491	88.5365	74.7729	78.2074	115.085	100.803	108.626
ENSMUSG00000001833_ENSMUSG00000001833_Sept7_chr9:25252438-25308571	ENSMUSG00000001833	ENSMUSG00000001833	Sept7	chr9:25252438-25308571	protein_coding	28.5409	29.6876	28.3613	29.8974	28.7235	28.241	43.7973	40.8799	40.3345	41.9566	46.2778	46.3688
ENSMUSG00000001844_ENSMUSG00000001844_Zdhhc4_chr5:143316488-143329256	ENSMUSG00000001844	ENSMUSG00000001844	Zdhhc4	chr5:143316488-143329256	protein_coding	18.7004	18.8488	22.2699	19.0462	19.703	17.0793	12.0975	14.7355	14.7395	13.3968	11.8389	10.8995
ENSMUSG00000001847_ENSMUSG00000001847_Rac1_chr5:143505477-143528036	ENSMUSG00000001847	ENSMUSG00000001847	Rac1	chr5:143505477-143528036	protein_coding	68.1761	76.041	78.7307	70.8418	74.7071	72.5012	77.1612	75.8383	71.0078	74.3365	80.6675	84.0355
ENSMUSG00000001855_ENSMUSG00000001855_Nup214_chr2:31974435-32053975	ENSMUSG00000001855	ENSMUSG00000001855	Nup214	chr2:31974435-32053975	protein_coding	3.8555	4.73269	4.43751	4.12644	3.50953	5.98242	3.10498	4.74252	3.24356	4.04431	5.54171	5.35204
ENSMUSG00000001864_ENSMUSG00000001864_Aif1l_chr2:31950259-31973442	ENSMUSG00000001864	ENSMUSG00000001864	Aif1l	chr2:31950259-31973442	protein_coding	1.04045	0.84439	2.38909	1.37173	1.03443	1.09667	1.05137	0.826921	2.11703	1.63203	1.7935	2.61162
ENSMUSG00000001865_ENSMUSG00000001865_Cpa3_chr3:20215616-20242181	ENSMUSG00000001865	ENSMUSG00000001865	Cpa3	chr3:20215616-20242181	protein_coding	0.798343	0.39419	1.44655	2.65923	2.04651	2.36282	0.606915	1.07235	0.836525	0.850376	1.9627	1.25922
ENSMUSG00000001870_ENSMUSG00000001870_Ltbp1_chr17:75005567-75392512	ENSMUSG00000001870	ENSMUSG00000001870	Ltbp1	chr17:75005567-75392512	protein_coding	2.65647	2.05928	3.18801	4.15421	2.84062	2.71199	2.22091	1.87609	2.48515	2.22282	2.5261	2.44012
ENSMUSG00000001891_ENSMUSG00000001891_Ugp2_chr11:21321137-21371201	ENSMUSG00000001891	ENSMUSG00000001891	Ugp2	chr11:21321137-21371201	protein_coding	84.0867	92.2298	77.0997	60.4324	61.9066	69.5883	68.0074	60.8753	72.9576	47.4775	43.8204	48.5478
ENSMUSG00000001901_ENSMUSG00000001901_Kcnh6_chr11:106008123-106034549	ENSMUSG00000001901	ENSMUSG00000001901	Kcnh6	chr11:106008123-106034549	protein_coding	0	0	0	0	0	0	0	0	0	0	0	0
ENSMUSG00000001909_ENSMUSG00000001909_Trmt1_chr8:84686306-84699808	ENSMUSG00000001909	ENSMUSG00000001909	Trmt1	chr8:84686306-84699808	protein_coding	12.6585	12.9913	18.8155	19.0627	20.4724	15.1803	27.8145	28.2481	29.4391	28.7886	28.8125	35.5655
ENSMUSG00000001910_ENSMUSG00000001910_Nacc1_chr8:84670482-84687862	ENSMUSG00000001910	ENSMUSG00000001910	Nacc1	chr8:84670482-84687862	protein_coding	10.1478	11.0386	12.0472	11.4969	12.6385	10.907	21.1015	20.052	21.2734	16.4163	15.8469	17.0768
ENSMUSG00000001911_ENSMUSG00000001911_Nfix_chr8:84699875-84800344	ENSMUSG00000001911	ENSMUSG00000001911	Nfix	chr8:84699875-84800344	protein_coding	29.8427	28.3087	34.1241	31.5081	37.6355	30.859	13.7202	11.642	13.0383	14.5624	11.9919	13.566
ENSMUSG00000001918_ENSMUSG00000001918_Slc1a5_chr7:16781345-16798274	ENSMUSG00000001918	ENSMUSG00000001918	Slc1a5	chr7:16781345-16798274	protein_coding	316.426	311.861	366.326	336.449	334.04	317.659	110.582	91.496	107.267	131.382	120.671	138.172
ENSMUSG00000001924_ENSMUSG00000001924_Uba1_chrX:20658325-20683179	ENSMUSG00000001924	ENSMUSG00000001924	Uba1	chrX:20658325-20683179	protein_coding	78.5325	80.1736	86.4123	82.868	78.9754	81.2352	89.1862	83.8301	74.7418	91.4391	93.3692	89.1254
ENSMUSG00000001930_ENSMUSG00000001930_Vwf_chr6:125546773-125686679	ENSMUSG00000001930	ENSMUSG00000001930	Vwf	chr6:125546773-125686679	protein_coding	3.63511	4.63516	8.05011	5.69985	6.41772	6.8468	4.84286	4.12919	3.25063	4.04419	2.90524	3.18521
ENSMUSG00000001942_ENSMUSG00000001942_Siae_chr9:37613846-37648318	ENSMUSG00000001942	ENSMUSG00000001942	Siae	chr9:37613846-37648318	protein_coding	3.98288	4.32441	4.13653	5.20386	4.35388	4.39102	1.37416	1.89599	2.13051	1.97415	1.44055	1.6132
ENSMUSG00000001943_ENSMUSG00000001943_Vsig2_chr9:37539254-37544205	ENSMUSG00000001943	ENSMUSG00000001943	Vsig2	chr9:37539254-37544205	protein_coding	1.8915	3.34909	1.98261	1.71765	2.25425	2.54414	2.04869	2.68085	2.2505	2.402	2.72963	2.48344
ENSMUSG00000001946_ENSMUSG00000001946_Esam_chr9:37528077-37538319	ENSMUSG00000001946	ENSMUSG00000001946	Esam	chr9:37528077-37538319	protein_coding	23.7467	23.5323	30.5488	28.0536	27.8192	26.6382	24.7957	27.2348	28.1517	35.5343	42.8145	39.8371
ENSMUSG00000001948_ENSMUSG00000001948_Spa17_chr9:37603294-37613720	ENSMUSG00000001948	ENSMUSG00000001948	Spa17	chr9:37603294-37613720	protein_coding	4.63007	5.0921	5.07634	4.41773	4.79139	6.66351	3.46554	3.25472	3.04202	4.5006	4.65199	2.3896
ENSMUSG00000001962_ENSMUSG00000001962_Fam50a_chrX:74313032-74320149	ENSMUSG00000001962	ENSMUSG00000001962	Fam50a	chrX:74313032-74320149	protein_coding	19.8996	17.879	20.4402	22.0585	19.8054	21.3712	30.8229	24.6567	29.2385	30.5133	29.3761	27.2804
ENSMUSG00000001964_ENSMUSG00000001964_Emd_chrX:74254686-74261548	ENSMUSG00000001964	ENSMUSG00000001964	Emd	chrX:74254686-74261548	protein_coding	13.1431	13.961	14.4883	17.0055	14.4961	15.1472	33.714	34.6857	29.809	31.9947	24.5684	26.0718
ENSMUSG00000001983_ENSMUSG00000001983_Taco1_chr11:106066060-106073612	ENSMUSG00000001983	ENSMUSG00000001983	Taco1	chr11:106066060-106073612	protein_coding	31.4103	29.5703	31.4758	26.7995	26.5667	29.0016	33.647	33.0518	34.6782	33.7519	28.0183	30.0267
ENSMUSG00000001985_ENSMUSG00000001985_Grik3_chr4:125490699-125714173	ENSMUSG00000001985	ENSMUSG00000001985	Grik3	chr4:125490699-125714173	protein_coding	0.075676	0.10396	0.122787	0.0788607	0.11149	0.0960434	0.0799614	0.0670173	0.0397374	0.0984823	0.121901	0.075422
ENSMUSG00000001986_ENSMUSG00000001986_Gria3_chrX:41400853-41678601	ENSMUSG00000001986	ENSMUSG00000001986	Gria3	chrX:41400853-41678601	protein_coding	0.066965	0.0569531	0.0339692	0.141323	0.0753585	0.127255	0.0467866	0.136127	0.0760543	0.178001	0.0508059	0.0345612
ENSMUSG00000001988_ENSMUSG00000001988_Npas1_chr7:16455720-16476780	ENSMUSG00000001988	ENSMUSG00000001988	Npas1	chr7:16455720-16476780	protein_coding	0.131951	0.0372113	0	0	0.0398265	0.0744031	0.0309115	0.0443909	0	0	0.0332991	0
ENSMUSG00000001995_ENSMUSG00000001995_Sipa1l2_chr8:125418062-125492710	ENSMUSG00000001995	ENSMUSG00000001995	Sipa1l2	chr8:125418062-125492710	protein_coding	1.76387	2.00355	2.37236	2.33463	2.61199	2.44926	1.80162	1.98897	1.73901	2.40421	2.78603	2.42885
ENSMUSG00000001998_ENSMUSG00000001998_Ap4e1_chr2:127008716-127067909	ENSMUSG00000001998	ENSMUSG00000001998	Ap4e1	chr2:127008716-127067909	protein_coding	1.59627	1.59707	1.73901	1.71875	1.95777	1.62072	1.99377	1.79099	2.06379	1.65697	2.14098	1.90128
ENSMUSG00000001999_ENSMUSG00000001999_Blvra_chr2:127070664-127097084	ENSMUSG00000001999	ENSMUSG00000001999	Blvra	chr2:127070664-127097084	protein_coding	33.471	35.9776	32.9017	27.512	28.9023	32.9337	14.1904	15.4794	14.4652	22.0213	21.0802	18.7294
ENSMUSG00000002006_ENSMUSG00000002006_Pdzd4_chrX:73793358-73824969	ENSMUSG00000002006	ENSMUSG00000002006	Pdzd4	chrX:73793358-73824969	protein_coding	0.266784	0.223556	0.364609	0.40455	0.329995	0.465944	0.359257	0.245168	0.255782	0.440841	0.44148	0.351287
ENSMUSG00000002007_ENSMUSG00000002007_Srpk3_chrX:73774404-73778925	ENSMUSG00000002007	ENSMUSG00000002007	Srpk3	chrX:73774404-73778925	protein_coding	1.51593	1.28009	0.285693	0.838231	0.41031	0.612724	0.520715	1.19774	0.655055	0.317774	0.628822	0.474092
ENSMUSG00000002010_ENSMUSG00000002010_Idh3g_chrX:73778962-73786897	ENSMUSG00000002010	ENSMUSG00000002010	Idh3g	chrX:73778962-73786897	protein_coding	774.798	724.42	841.18	783.876	757.197	780.871	686.917	705.613	719.003	745.07	681.083	713.836
ENSMUSG00000002012_ENSMUSG00000002012_Pnck_chrX:73655993-73660117	ENSMUSG00000002012	ENSMUSG00000002012	Pnck	chrX:73655993-73660117	protein_coding	0.393569	0.305482	0.524828	0.527491	0.466578	0.528675	0.538326	0.260298	0.270177	0.205987	0.191061	0.388513
ENSMUSG00000002014_ENSMUSG00000002014_Ssr4_chrX:73787027-73790830	ENSMUSG00000002014	ENSMUSG00000002014	Ssr4	chrX:73787027-73790830	protein_coding	77.2578	76.4727	82.9504	79.6108	77.9316	76.3386	84.7325	78.1428	81.1502	74.2213	70.4885	62.6544
ENSMUSG00000002015_ENSMUSG00000002015_Bcap31_chrX:73686177-73716175	ENSMUSG00000002015	ENSMUSG00000002015	Bcap31	chrX:73686177-73716175	protein_coding	121.913	124.982	120.468	125.059	122.521	135.729	145.404	153.785	165.024	119.279	113.326	118.336
ENSMUSG00000002017_ENSMUSG00000002017_Fam98a_chr17:75537085-75551946	ENSMUSG00000002017	ENSMUSG00000002017	Fam98a	chr17:75537085-75551946	protein_coding	10.2282	9.41446	9.95315	9.95672	10.0509	9.16049	13.6459	12.2938	13.4667	11.6876	11.0488	11.6136
ENSMUSG00000002020_ENSMUSG00000002020_Ltbp2_chr12:84783211-84876532	ENSMUSG00000002020	ENSMUSG00000002020	Ltbp2	chr12:84783211-84876532	protein_coding	49.4819	44.6346	47.178	49.0934	48.7917	47.8906	16.9316	13.6898	18.1607	15.1148	15.0171	15.5039
ENSMUSG00000002028_ENSMUSG00000002028_Mll1_chr9:44803354-44881296	ENSMUSG00000002028	ENSMUSG00000002028	Mll1	chr9:44803354-44881296	protein_coding	2.09466	1.71016	2.12538	2.05348	2.02676	1.71617	1.64874	1.41387	1.74251	2.24946	1.89584	2.5253
ENSMUSG00000002031_ENSMUSG00000002031_Ift46_chr9:44767907-44792714	ENSMUSG00000002031	ENSMUSG00000002031	Ift46	chr9:44767907-44792714	protein_coding	51.277	54.1888	42.2182	65.3192	51.12	45.5476	7.84613	16.0913	17.9607	26.0244	26.7337	34.0743
ENSMUSG00000002032_ENSMUSG00000002032_Tmem25_chr9:44793775-44799307	ENSMUSG00000002032	ENSMUSG00000002032	Tmem25	chr9:44793775-44799307	protein_coding	3.02573	2.81843	2.94703	3.84339	2.91177	3.02412	0.179449	0.139866	0.387959	0.687151	0.50429	0.294796
ENSMUSG00000002033_ENSMUSG00000002033_Cd3g_chr9:44969571-44980431	ENSMUSG00000002033	ENSMUSG00000002033	Cd3g	chr9:44969571-44980431	protein_coding	0.507192	1.08669	1.05786	0.7597	0.458311	1.02894	1.10075	0.203798	0.830026	0.643117	0.585226	0.844966
ENSMUSG00000002043_ENSMUSG00000002043_Trappc6a_chr7:19508669-19516145	ENSMUSG00000002043	ENSMUSG00000002043	Trappc6a	chr7:19508669-19516145	protein_coding	19.74	19.8627	24.2944	20.8827	25.8368	27.5635	23.8644	22.8189	22.2605	15.9096	15.8168	13.561
ENSMUSG00000002052_ENSMUSG00000002052_Supt6_chr11:78206745-78245987	ENSMUSG00000002052	ENSMUSG00000002052	Supt6	chr11:78206745-78245987	protein_coding	12.3543	12.3591	13.1174	13.1775	14.0291	13.6947	29.3444	29.7971	29.7286	21.9579	21.2618	23.8929
ENSMUSG00000002055_ENSMUSG00000002055_Spag5_chr11:78301528-78322457	ENSMUSG00000002055	ENSMUSG00000002055	Spag5	chr11:78301528-78322457	protein_coding	0.89604	0.502201	1.13096	0.808088	1.42959	0.725666	0.11433	0.0911022	0	1.64303	1.31508	0.754838
ENSMUSG00000002057_ENSMUSG00000002057_Foxn1_chr11:78357576-78386558	ENSMUSG00000002057	ENSMUSG00000002057	Foxn1	chr11:78357576-78386558	protein_coding	0	0	0	0	0	0	0	0	0	0	0	0
ENSMUSG00000002058_ENSMUSG00000002058_Unc119_chr11:78343481-78349164	ENSMUSG00000002058	ENSMUSG00000002058	Unc119	chr11:78343481-78349164	protein_coding	5.50666	6.88998	7.14793	6.17698	8.50554	7.95823	2.54373	3.07866	2.52016	3.00685	2.77762	2.28473
ENSMUSG00000002059_ENSMUSG00000002059_Rab34_chr11:78188429-78192193	ENSMUSG00000002059	ENSMUSG00000002059	Rab34	chr11:78188429-78192193	protein_coding	51.8373	52.0027	57.0715	55.9141	52.5783	64.1257	44.8552	48.6369	40.0425	47.7471	46.9443	52.026
ENSMUSG00000002064_ENSMUSG00000002064_Sdf2_chr11:78245745-78255496	ENSMUSG00000002064	ENSMUSG00000002064	Sdf2	chr11:78245745-78255496	protein_coding	24.0486	23.0289	25.1564	23.8562	22.4712	25.0642	33.7263	31.8427	30.1584	21.9211	21.823	19.6226
ENSMUSG00000002068_ENSMUSG00000002068_Ccne1_chr7:38097983-38107534	ENSMUSG00000002068	ENSMUSG00000002068	Ccne1	chr7:38097983-38107534	protein_coding	1.9872	2.50777	3.40182	2.85079	1.5064	3.11728	0.994417	0.466341	0.484631	0.612192	0.753576	0.552783
ENSMUSG00000002076_ENSMUSG00000002076_Hsf2bp_chr17:31944768-32034508	ENSMUSG00000002076	ENSMUSG00000002076	Hsf2bp	chr17:31944768-32034508	protein_coding	0.401249	0.336397	0.483022	0.112265	0.121583	0.186699	0.021918	0.443019	0	0.107309	0.333216	0.165179
ENSMUSG00000002083_ENSMUSG00000002083_Bbc3_chr7:16309615-16318205	ENSMUSG00000002083	ENSMUSG00000002083	Bbc3	chr7:16309615-16318205	protein_coding	3.44967	4.57918	4.63657	4.09537	4.49663	4.61933	2.15588	1.94372	2.3602	2.36822	1.5862	2.60542
ENSMUSG00000002100_ENSMUSG00000002100_Mybpc3_chr2:91118143-91136516	ENSMUSG00000002100	ENSMUSG00000002100	Mybpc3	chr2:91118143-91136516	protein_coding	0	0.0177782	0	0	0	0.0177865	0.0147985	0	0.0220696	0.0168288	0.0319598	0
ENSMUSG00000002102_ENSMUSG00000002102_Psmc3_chr2:91054008-91066369	ENSMUSG00000002102	ENSMUSG00000002102	Psmc3	chr2:91054008-91066369	protein_coding	64.0757	59.1834	65.3821	65.4675	66.2875	62.6752	81.1491	82.9919	76.3936	81.4822	76.7094	74.6874
ENSMUSG00000002103_ENSMUSG00000002103_Acp2_chr2:91202884-91214098	ENSMUSG00000002103	ENSMUSG00000002103	Acp2	chr2:91202884-91214098	protein_coding	8.70087	8.1136	8.9566	8.44352	9.76951	7.82507	9.88729	10.0573	9.26831	9.39375	7.33771	8.47116
ENSMUSG00000002104_ENSMUSG00000002104_Rapsn_chr2:91035619-91045729	ENSMUSG00000002104	ENSMUSG00000002104	Rapsn	chr2:91035619-91045729	protein_coding	0.845205	1.05133	1.16761	0.69046	0.421913	0.940864	0.269085	0.335531	0.0696527	0.558488	0.68074	0.778958
ENSMUSG00000002105_ENSMUSG00000002105_Slc39a13_chr2:91061790-91070417	ENSMUSG00000002105	ENSMUSG00000002105	Slc39a13	chr2:91061790-91070417	protein_coding	12.0238	10.3665	13.6608	14.3844	12.0353	12.2782	11.2678	10.0885	12.6572	12.4838	13.8501	14.7372
ENSMUSG00000002107_ENSMUSG00000002107_Celf2_chr2:6539693-7509563	ENSMUSG00000002107	ENSMUSG00000002107	Celf2	chr2:6539693-7509563	protein_coding	31.5434	27.4351	21.7908	30.6048	25.0427	27.2052	29.6361	30.8852	28.6251	40.5028	33.8221	39.9862
ENSMUSG00000002108_ENSMUSG00000002108_Nr1h3_chr2:91184060-91202834	ENSMUSG00000002108	ENSMUSG00000002108	Nr1h3	chr2:91184060-91202834	protein_coding	22.4375	22.9587	25.8629	29.4181	27.0186	29.6571	48.1669	46.9833	49.3848	45.8508	43.2618	38.2265
ENSMUSG00000002109_ENSMUSG00000002109_Ddb2_chr2:91211571-91236982	ENSMUSG00000002109	ENSMUSG00000002109	Ddb2	chr2:91211571-91236982	protein_coding	6.6256	5.79934	5.66329	5.79011	6.15605	7.3009	1.89813	2.05067	2.18968	2.48253	2.54485	2.88484
ENSMUSG00000002111_ENSMUSG00000002111_Sfpi1_chr2:91082389-91115756	ENSMUSG00000002111	ENSMUSG00000002111	Sfpi1	chr2:91082389-91115756	protein_coding	1.73597	2.78985	2.79121	3.05157	2.38982	2.39274	2.69912	3.69625	2.35005	3.53561	3.56813	5.66959
ENSMUSG00000002129_ENSMUSG00000002129_Sf3a1_chr11:4160349-4182541	ENSMUSG00000002129	ENSMUSG00000002129	Sf3a1	chr11:4160349-4182541	protein_coding	7.698	6.8907	7.63546	6.37819	6.91683	6.01969	10.8134	8.98904	6.8314	10.1493	10.6894	8.29521
ENSMUSG00000002147_ENSMUSG00000002147_Stat6_chr10:127642985-127660957	ENSMUSG00000002147	ENSMUSG00000002147	Stat6	chr10:127642985-127660957	protein_coding	17.5198	17.4639	20.786	18.9792	22.698	18.7485	16.4524	12.8567	15.8677	14.1722	16.6261	13.9921
ENSMUSG00000002190_ENSMUSG00000002190_Clgn_chr8:83389866-83428552	ENSMUSG00000002190	ENSMUSG00000002190	Clgn	chr8:83389866-83428552	protein_coding	0	0.0336072	0	0	0.0203313	0.033603	0.0315875	0	0	0.031774	0	0
ENSMUSG00000002204_ENSMUSG00000002204_Napsa_chr7:44572431-44586862	ENSMUSG00000002204	ENSMUSG00000002204	Napsa	chr7:44572431-44586862	protein_coding	0.127337	0	0.390522	0.583242	0.633707	0.269203	0.402185	0.320779	0.201254	0.864788	1.25235	1.71253
ENSMUSG00000002205_ENSMUSG00000002205_Vrk3_chr7:44748412-44777515	ENSMUSG00000002205	ENSMUSG00000002205	Vrk3	chr7:44748412-44777515	protein_coding	12.1461	13.0124	15.6464	15.1952	11.2585	13.2246	10.2691	9.69769	10.4096	8.84987	11.0881	9.95783
ENSMUSG00000002210_ENSMUSG00000002210_Smg9_chr7:24399618-24422778	ENSMUSG00000002210	ENSMUSG00000002210	Smg9	chr7:24399618-24422778	protein_coding	5.99717	5.85892	7.39031	9.21751	7.84925	7.44096	5.00822	4.61676	4.44275	7.01306	5.44003	7.49217
ENSMUSG00000002221_ENSMUSG00000002221_Paxip1_chr5:27740666-27791339	ENSMUSG00000002221	ENSMUSG00000002221	Paxip1	chr5:27740666-27791339	protein_coding	3.83887	3.26033	4.38082	5.10646	4.1412	3.56437	3.65057	3.82519	2.94641	3.84964	3.82562	4.09293
ENSMUSG00000002222_ENSMUSG00000002222_Rmnd5a_chr6:71388633-71440637	ENSMUSG00000002222	ENSMUSG00000002222	Rmnd5a	chr6:71388633-71440637	protein_coding	25.0867	29.9846	24.9163	24.2286	23.0898	25.1456	17.7441	16.5779	17.9395	12.4832	12.9801	12.5203
ENSMUSG00000002227_ENSMUSG00000002227_Mov10_chr3:104794835-104818563	ENSMUSG00000002227	ENSMUSG00000002227	Mov10	chr3:104794835-104818563	protein_coding	2.38242	2.1854	2.96406	2.48478	2.82318	2.59919	0.968291	0.845527	1.0251	1.20322	0.926664	1.0102
ENSMUSG00000002228_ENSMUSG00000002228_Ppm1j_chr3:104781055-104786018	ENSMUSG00000002228	ENSMUSG00000002228	Ppm1j	chr3:104781055-104786018	protein_coding	0.492489	0.694595	0.967805	0.865993	0.643886	0.323948	1.65249	1.21395	1.08993	1.79325	1.65647	2.34425
ENSMUSG00000002233_ENSMUSG00000002233_Rhoc_chr3:104789010-104794459	ENSMUSG00000002233	ENSMUSG00000002233	Rhoc	chr3:104789010-104794459	protein_coding	33.0951	33.6192	40.1316	34.1223	39.6574	31.7026	66.8832	65.449	58.2776	93.2327	91.1683	94.2501
ENSMUSG00000002240_ENSMUSG00000002240_4930432K09Rik_chr5:87825685-87846386	ENSMUSG00000002240	ENSMUSG00000002240	4930432K09Rik	chr5:87825685-87846386	protein_coding	0	0	0	0	0	0	0	0	0	0	0	0
ENSMUSG00000002249_ENSMUSG00000002249_Tead3_chr17:28331670-28350805	ENSMUSG00000002249	ENSMUSG00000002249	Tead3	chr17:28331670-28350805	protein_coding	3.98305	3.3583	4.85899	3.67796	4.41806	2.8447	1.73483	1.65971	1.41362	2.56504	2.76483	2.3471
ENSMUSG00000002250_ENSMUSG00000002250_Ppard_chr17:28232753-28301469	ENSMUSG00000002250	ENSMUSG00000002250	Ppard	chr17:28232753-28301469	protein_coding	9.79217	10.1277	10.5569	7.62307	9.50184	9.61216	9.45597	10.3091	9.12748	12.827	14.8464	12.7884
ENSMUSG00000002257_ENSMUSG00000002257_Def6_chr17:28207777-28228608	ENSMUSG00000002257	ENSMUSG00000002257	Def6	chr17:28207777-28228608	protein_coding	1.24107	0.77895	1.14539	1.06738	1.41398	0.677255	0.591015	0.848784	0.881861	0.736444	1.21255	1.07704
ENSMUSG00000002265_ENSMUSG00000002265_Peg3_chr7:6703891-6730421	ENSMUSG00000002265	ENSMUSG00000002265	Peg3	chr7:6703891-6730421	protein_coding	3.70983	3.96053	3.56586	4.65205	4.21586	3.47419	9.50811	8.81331	8.05011	8.61245	10.1686	8.2143
ENSMUSG00000002266_ENSMUSG00000002266_Zim1_chr7:6675442-6696450	ENSMUSG00000002266	ENSMUSG00000002266	Zim1	chr7:6675442-6696450	protein_coding	0.318055	0.299371	0.409237	0.40165	0.289818	0.271545	0.203211	0.258835	0.183886	0.181759	0.291013	0.192058
ENSMUSG00000002274_ENSMUSG00000002274_Metrn_chr17:25794570-25797136	ENSMUSG00000002274	ENSMUSG00000002274	Metrn	chr17:25794570-25797136	protein_coding	0.636637	0.242599	0.366983	0.524392	0.583644	0.18194	0.222788	0.319654	0.333019	0.592358	0.0801465	0.177035
ENSMUSG00000002279_ENSMUSG00000002279_Lmf1_chr17:25579173-25662826	ENSMUSG00000002279	ENSMUSG00000002279	Lmf1	chr17:25579173-25662826	protein_coding	23.2681	17.7717	24.6285	24.5158	23.2728	22.0126	12.295	14.7962	14.2442	14.7354	14.0173	12.9672
ENSMUSG00000002280_ENSMUSG00000002280_Narfl_chr17:25773775-25783332	ENSMUSG00000002280	ENSMUSG00000002280	Narfl	chr17:25773775-25783332	protein_coding	27.4777	20.1024	24.9886	25.9915	21.0394	24.5371	17.4163	24.1769	16.7164	19.3751	14.3018	14.9819
ENSMUSG00000002289_ENSMUSG00000002289_Angptl4_chr17:33773749-33781575	ENSMUSG00000002289	ENSMUSG00000002289	Angptl4	chr17:33773749-33781575	protein_coding	200.612	187.696	226.351	234.378	198.655	182.318	81.852	70.6578	70.849	129.729	146.014	161.761
ENSMUSG00000002297_ENSMUSG00000002297_Dbf4_chr5:8396972-8422716	ENSMUSG00000002297	ENSMUSG00000002297	Dbf4	chr5:8396972-8422716	protein_coding	0.753317	0.609446	1.03238	0.714502	0.970801	0.864446	0.655686	0.417477	0.319659	0.61196	0.716311	0.632919
ENSMUSG00000002307_ENSMUSG00000002307_Daxx_chr17:33909413-33915589	ENSMUSG00000002307	ENSMUSG00000002307	Daxx	chr17:33909413-33915589	protein_coding	7.70815	6.70288	6.64697	9.3964	9.19056	7.91361	6.06516	5.51061	9.90705	8.57925	7.19867	12.7332
ENSMUSG00000002308_ENSMUSG00000002308_Cd320_chr17:33843090-33849774	ENSMUSG00000002308	ENSMUSG00000002308	Cd320	chr17:33843090-33849774	protein_coding	11.4326	11.5542	15.4225	16.3501	16.8741	16.6027	15.6059	14.4784	15.2049	19.8259	12.7857	13.4626
ENSMUSG00000002319_ENSMUSG00000002319_Ipo4_chr14:55625399-55637895	ENSMUSG00000002319	ENSMUSG00000002319	Ipo4	chr14:55625399-55637895	protein_coding	16.3669	10.8316	13.8675	11.2806	17.4971	15.6891	25.6831	21.4269	22.9643	32.5918	35.0173	33.7057
ENSMUSG00000002320_ENSMUSG00000002320_Tm9sf1_chr14:55635964-55643806	ENSMUSG00000002320	ENSMUSG00000002320	Tm9sf1	chr14:55635964-55643806	protein_coding	19.4053	23.0294	22.4213	25.6717	22.9928	19.1802	21.7596	20.9031	24.9599	23.1181	19.7972	17.5959
ENSMUSG00000002324_ENSMUSG00000002324_Rec8_chr14:55618036-55625395	ENSMUSG00000002324	ENSMUSG00000002324	Rec8	chr14:55618036-55625395	protein_coding	0	0	0.0285478	0	0	0	0.0918894	0	0	0	0.396248	0
ENSMUSG00000002325_ENSMUSG00000002325_Irf9_chr14:55603570-55610030	ENSMUSG00000002325	ENSMUSG00000002325	Irf9	chr14:55603570-55610030	protein_coding	5.30763	4.74331	5.58468	6.39247	8.09734	7.54346	5.55794	5.37921	5.44345	7.56319	9.10605	8.59113
ENSMUSG00000002326_ENSMUSG00000002326_Gmpr2_chr14:55672234-55678750	ENSMUSG00000002326	ENSMUSG00000002326	Gmpr2	chr14:55672234-55678750	protein_coding	13.3926	12.1746	13.15	10.8953	10.7723	10.0147	6.74604	5.81115	7.60262	7.87724	7.88085	7.19602
ENSMUSG00000002329_ENSMUSG00000002329_Mdp1_chr14:55657878-55660508	ENSMUSG00000002329	ENSMUSG00000002329	Mdp1	chr14:55657878-55660508	protein_coding	11.1297	9.96944	12.2246	9.90338	11.0077	11.2951	5.41436	6.51502	6.48834	6.94319	6.3685	7.24797
ENSMUSG00000002332_ENSMUSG00000002332_Dhrs1_chr14:55739019-55745690	ENSMUSG00000002332	ENSMUSG00000002332	Dhrs1	chr14:55739019-55745690	protein_coding	32.7289	32.3923	37.3951	34.0716	32.0606	33.1105	24.7487	25.0624	22.8324	22.1195	20.252	22.2002
ENSMUSG00000002341_ENSMUSG00000002341_Ncan_chr8:70093084-70120873	ENSMUSG00000002341	ENSMUSG00000002341	Ncan	chr8:70093084-70120873	protein_coding	1.00859	1.0132	1.26431	0.247291	1.14022	1.11436	0.693641	0.540312	0.722694	0.228039	0.125915	0.0591286
ENSMUSG00000002342_ENSMUSG00000002342_Tmem161a_chr8:70172355-70183681	ENSMUSG00000002342	ENSMUSG00000002342	Tmem161a	chr8:70172355-70183681	protein_coding	14.2426	13.9845	19.0171	8.86299	14.8807	10.5496	7.96004	6.56179	7.27894	9.39926	50.5708	11.3182
ENSMUSG00000002343_ENSMUSG00000002343_Armc6_chr8:70220171-70234466	ENSMUSG00000002343	ENSMUSG00000002343	Armc6	chr8:70220171-70234466	protein_coding	4.04656	4.49949	5.07145	4.80381	6.21715	5.85291	8.57113	10.1391	8.228	11.3504	10.479	9.44439
ENSMUSG00000002345_ENSMUSG00000002345_2310045N01Rik_chr8:70139498-70167488	ENSMUSG00000002345	ENSMUSG00000002345	2310045N01Rik	chr8:70139498-70167488	protein_coding	25.0776	22.2315	23.7639	25.3744	25.8196	27.2962	23.7742	24.8063	28.5626	20.3854	19.3513	20.0038
ENSMUSG00000002346_ENSMUSG00000002346_Slc25a42_chr8:70184339-70212305	ENSMUSG00000002346	ENSMUSG00000002346	Slc25a42	chr8:70184339-70212305	protein_coding	112.804	112.577	120.656	132.353	136.544	114.002	91.4882	90.2792	100.941	111.612	104.346	89.7374
ENSMUSG00000002365_ENSMUSG00000002365_Snx9_chr17:5841327-5931033	ENSMUSG00000002365	ENSMUSG00000002365	Snx9	chr17:5841327-5931033	protein_coding	26.6601	26.3053	25.6971	31.7065	28.3008	28.8483	16.841	16.9727	18.1846	21.5653	20.4448	21.3566
ENSMUSG00000002372_ENSMUSG00000002372_Ranbp3_chr17:56673224-56711769	ENSMUSG00000002372	ENSMUSG00000002372	Ranbp3	chr17:56673224-56711769	protein_coding	11.9785	10.5888	13.9233	13.5177	12.8044	12.1709	13.2794	14.4768	12.4534	13.4378	12.9668	13.1903
ENSMUSG00000002379_ENSMUSG00000002379_Ndufa11_chr17:56717761-56724248	ENSMUSG00000002379	ENSMUSG00000002379	Ndufa11	chr17:56717761-56724248	protein_coding	29.3498	28.5675	32.1363	26.961	29.7062	27.5265	30.8071	30.8231	33.6106	33.9366	30.2092	29.8177
ENSMUSG00000002384_ENSMUSG00000002384_Bmp8b_chr4:123105164-123132099	ENSMUSG00000002384	ENSMUSG00000002384	Bmp8b	chr4:123105164-123132099	protein_coding	0.0303285	0.106879	0.0620353	0	0.0824267	0.102622	0.971479	1.00101	0.859263	0.204704	0.172294	0.0906647
ENSMUSG00000002393_ENSMUSG00000002393_Nr2f6_chr8:71374122-71381960	ENSMUSG00000002393	ENSMUSG00000002393	Nr2f6	chr8:71374122-71381960	protein_coding	27.1385	22.3691	30.3632	27.4051	33.5729	30.4078	31.764	27.5021	28.4227	31.4195	28.8814	28.4153
ENSMUSG00000002395_ENSMUSG00000002395_Use1_chr8:71366847-71369732	ENSMUSG00000002395	ENSMUSG00000002395	Use1	chr8:71366847-71369732	protein_coding	68.7785	62.6029	81.8235	81.4767	77.6432	78.4816	58.4882	67.1064	57.8252	65.9956	57.3083	61.8551
ENSMUSG00000002396_ENSMUSG00000002396_Ocel1_chr8:71371297-71379361	ENSMUSG00000002396	ENSMUSG00000002396	Ocel1	chr8:71371297-71379361	protein_coding	13.6942	12.98	16.0033	14.8986	14.367	16.1792	9.36143	12.7191	10.1386	9.19989	10.2175	10.2424
ENSMUSG00000002409_ENSMUSG00000002409_Dyrk1b_chr7:28179468-28187294	ENSMUSG00000002409	ENSMUSG00000002409	Dyrk1b	chr7:28179468-28187294	protein_coding	9.6881	11.3727	11.2238	11.2439	11.7939	12.4035	7.51041	9.05359	8.77274	7.1644	6.49034	5.45796
ENSMUSG00000002413_ENSMUSG00000002413_Braf_chr6:39603236-39725463	ENSMUSG00000002413	ENSMUSG00000002413	Braf	chr6:39603236-39725463	protein_coding	3.0665	2.82269	2.68832	2.97673	2.43925	2.71972	3.97853	4.43445	3.81563	3.78754	4.32987	3.94673
ENSMUSG00000002416_ENSMUSG00000002416_Ndufb2_chr6:39592573-39603382	ENSMUSG00000002416	ENSMUSG00000002416	Ndufb2	chr6:39592573-39603382	protein_coding	334.903	302.253	335.344	336.175	332.483	352.037	370.448	386.462	387.732	383.256	338.696	349.348
ENSMUSG00000002428_ENSMUSG00000002428_Hltf_chr3:20057810-20118490	ENSMUSG00000002428	ENSMUSG00000002428	Hltf	chr3:20057810-20118490	protein_coding	3.53209	3.08946	3.53943	2.76906	3.39926	2.84974	1.36709	1.19231	1.02852	1.36271	0.82395	0.817917
ENSMUSG00000002455_ENSMUSG00000002455_Prpf6_chr2:181591867-181655660	ENSMUSG00000002455	ENSMUSG00000002455	Prpf6	chr2:181591867-181655660	protein_coding	17.346	15.2777	16.1942	17.2812	16.3846	14.5852	19.6478	19.9006	19.1587	19.2256	17.9979	18.4153
ENSMUSG00000002458_ENSMUSG00000002458_Rgs19_chr2:181688418-181693977	ENSMUSG00000002458	ENSMUSG00000002458	Rgs19	chr2:181688418-181693977	protein_coding	5.82248	6.14717	8.43328	7.68628	11.7622	6.42992	7.90257	5.60705	5.03832	10.062	10.2183	12.7672
ENSMUSG00000002459_ENSMUSG00000002459_Rgs20_chr1:4909575-5070285	ENSMUSG00000002459	ENSMUSG00000002459	Rgs20	chr1:4909575-5070285	protein_coding	0.36426	0.136129	0.298805	0.043927	0.047736	0	0.0370405	0.053186	0.0552881	0.0421541	0	0.24374
ENSMUSG00000002475_ENSMUSG00000002475_Abhd3_chr18:10644410-10706771	ENSMUSG00000002475	ENSMUSG00000002475	Abhd3	chr18:10644410-10706771	protein_coding	1.08872	0.835622	1.04792	1.29798	1.66712	1.04404	0.697265	1.14751	0.990196	0.793531	0.523251	0.75266
ENSMUSG00000002477_ENSMUSG00000002477_Snrpd1_chr18:10617795-10628230	ENSMUSG00000002477	ENSMUSG00000002477	Snrpd1	chr18:10617795-10628230	protein_coding	11.2921	14.3578	13.035	14.1964	14.4592	12.8715	18.349	17.6328	15.9189	20.712	20.6106	22.0288
ENSMUSG00000002486_ENSMUSG00000002486_Tchp_chr5:114707759-114722327	ENSMUSG00000002486	ENSMUSG00000002486	Tchp	chr5:114707759-114722327	protein_coding	6.48343	3.78937	4.25529	4.20364	5.60256	4.18963	1.14048	1.92805	1.83959	2.41881	2.50056	2.72241
ENSMUSG00000002489_ENSMUSG00000002489_Tiam1_chr16:89787110-89980080	ENSMUSG00000002489	ENSMUSG00000002489	Tiam1	chr16:89787110-89980080	protein_coding	2.51401	2.29924	2.70329	4.65159	3.28784	3.01809	3.07513	4.09377	3.41689	6.13206	5.06135	5.04323
ENSMUSG00000002496_ENSMUSG00000002496_Tsc2_chr17:24595936-24632629	ENSMUSG00000002496	ENSMUSG00000002496	Tsc2	chr17:24595936-24632629	protein_coding	17.0437	16.3582	18.6342	17.6924	17.8552	17.7336	14.097	13.3816	14.1429	14.2348	12.7391	12.6274
ENSMUSG00000002500_ENSMUSG00000002500_Rpl3l_chr17:24727819-24736143	ENSMUSG00000002500	ENSMUSG00000002500	Rpl3l	chr17:24727819-24736143	protein_coding	1.20547	2.58113	4.867	5.31388	3.41405	1.90132	4.31498	8.85473	4.98991	2.77521	3.16418	3.74385
ENSMUSG00000002504_ENSMUSG00000002504_Slc9a3r2_chr17:24639281-24650305	ENSMUSG00000002504	ENSMUSG00000002504	Slc9a3r2	chr17:24639281-24650305	protein_coding	27.8739	25.6538	31.3906	31.4366	44.069	31.5303	42.56	46.2902	38.2115	56.6278	61.5282	48.8783
ENSMUSG00000002524_ENSMUSG00000002524_Puf60_chr15:76070183-76080946	ENSMUSG00000002524	ENSMUSG00000002524	Puf60	chr15:76070183-76080946	protein_coding	32.251	30.3097	35.5829	35.6349	39.0063	33.5864	37.8515	39.935	37.9162	46.8168	47.3383	44.3321
ENSMUSG00000002546_ENSMUSG00000002546_Golga2_chr2:32287383-32307921	ENSMUSG00000002546	ENSMUSG00000002546	Golga2	chr2:32287383-32307921	protein_coding	34.0318	23.7275	27.0945	27.7952	29.7493	31.3538	22.507	20.2395	21.5187	20.9886	21.0131	18.8489
ENSMUSG00000002550_ENSMUSG00000002550_Uck1_chr2:32255001-32260159	ENSMUSG00000002550	ENSMUSG00000002550	Uck1	chr2:32255001-32260159	protein_coding	194.055	204.764	202.155	187.576	228.157	209.33	145.659	140.259	147.717	81.8701	78.2291	73.5683
ENSMUSG00000002565_ENSMUSG00000002565_Scin_chr12:40059768-40134228	ENSMUSG00000002565	ENSMUSG00000002565	Scin	chr12:40059768-40134228	protein_coding	0.203223	0.20116	0.202722	0.297307	0.242412	0.201199	0.0238187	0.102635	0.106608	0.118944	0.0900804	0.0674987
ENSMUSG00000002578_ENSMUSG00000002578_Ikzf4_chr10:128630842-128645991	ENSMUSG00000002578	ENSMUSG00000002578	Ikzf4	chr10:128630842-128645991	protein_coding	0.312356	0.150972	0.218131	0.223742	0.18523	0.114802	0.0590481	0.0343979	0.0433282	0.0267254	0.0968536	0.164292
ENSMUSG00000002580_ENSMUSG00000002580_Mien1_chr11:98437707-98438991	ENSMUSG00000002580	ENSMUSG00000002580	Mien1	chr11:98437707-98438991	protein_coding	36.4429	34.2823	40.8653	38.6972	36.5971	36.8707	38.4606	41.9724	43.332	36.9277	37.1788	32.9251
ENSMUSG00000002588_ENSMUSG00000002588_Pon1_chr6:5168089-5193946	ENSMUSG00000002588	ENSMUSG00000002588	Pon1	chr6:5168089-5193946	protein_coding	13.1896	9.68304	9.95719	30.3813	22.3183	25.4649	8.13398	9.20329	6.58021	16.3199	15.3487	16.2993
ENSMUSG00000002602_ENSMUSG00000002602_Axl_chr7:25757272-25788705	ENSMUSG00000002602	ENSMUSG00000002602	Axl	chr7:25757272-25788705	protein_coding	13.5858	12.5742	17.0428	18.5073	17.559	15.6032	15.8651	15.7325	12.8697	21.2908	20.9116	17.9984
ENSMUSG00000002603_ENSMUSG00000002603_Tgfb1_chr7:25687001-25705077	ENSMUSG00000002603	ENSMUSG00000002603	Tgfb1	chr7:25687001-25705077	protein_coding	6.72078	6.26991	7.0834	7.42484	10.1234	7.05682	6.67629	5.44055	5.05615	7.91351	9.60158	10.6087
ENSMUSG00000002608_ENSMUSG00000002608_Ccdc97_chr7:25711105-25719088	ENSMUSG00000002608	ENSMUSG00000002608	Ccdc97	chr7:25711105-25719088	protein_coding	14.2081	15.1588	17.8459	14.9606	16.684	14.7583	14.1477	12.4686	13.0911	14.5592	15.6697	15.5703
ENSMUSG00000002617_ENSMUSG00000002617_Zfp40_chr17:23173868-23193252	ENSMUSG00000002617	ENSMUSG00000002617	Zfp40	chr17:23173868-23193252	protein_coding	1.68109	2.58316	1.80253	2.40385	1.64733	2.3187	2.05442	1.28138	1.05813	1.1106	1.64275	1.45213
ENSMUSG00000002625_ENSMUSG00000002625_Akap8l_chr17:32321424-32350581	ENSMUSG00000002625	ENSMUSG00000002625	Akap8l	chr17:32321424-32350581	protein_coding	12.9088	12.6476	14.8005	14.6347	14.9822	14.0511	7.60676	7.96896	7.4436	9.57748	10.0583	8.53036
ENSMUSG00000002633_ENSMUSG00000002633_Shh_chr5:28456814-28467101	ENSMUSG00000002633	ENSMUSG00000002633	Shh	chr5:28456814-28467101	protein_coding	0	0	0	0	0	0	0	0	0	0	0	0
ENSMUSG00000002635_ENSMUSG00000002635_Pdcd2l_chr7:34184498-34196661	ENSMUSG00000002635	ENSMUSG00000002635	Pdcd2l	chr7:34184498-34196661	protein_coding	6.93959	8.4911	8.19598	9.38765	8.84052	9.44739	6.42475	7.54701	5.66074	6.80777	6.84684	5.24073
ENSMUSG00000002658_ENSMUSG00000002658_Gtf2f1_chr17:57003404-57011288	ENSMUSG00000002658	ENSMUSG00000002658	Gtf2f1	chr17:57003404-57011288	protein_coding	17.9411	19.268	21.0865	20.7931	21.354	20.0451	27.6656	26.556	24.5595	29.6009	26.6981	31.977
ENSMUSG00000002660_ENSMUSG00000002660_Clpp_chr17:56990263-56996371	ENSMUSG00000002660	ENSMUSG00000002660	Clpp	chr17:56990263-56996371	protein_coding	56.3049	52.7243	65.7808	58.1765	56.4519	63.5661	66.1099	71.893	67.1101	78.4635	65.6025	64.4127
ENSMUSG00000002661_ENSMUSG00000002661_Alkbh7_chr17:56997338-56999322	ENSMUSG00000002661	ENSMUSG00000002661	Alkbh7	chr17:56997338-56999322	protein_coding	28.2621	26.8425	33.7777	34.5622	35.5172	33.1409	21.2932	22.952	25.661	30.1255	22.078	22.0992
ENSMUSG00000002664_ENSMUSG00000002664_Pspn_chr17:56999456-57000018	ENSMUSG00000002664	ENSMUSG00000002664	Pspn	chr17:56999456-57000018	protein_coding	0	0.26234	0.204873	0	0.276526	0	0.425962	0.609463	0.640134	0	0	0.306554
ENSMUSG00000002668_ENSMUSG00000002668_Dennd1c_chr17:57066055-57078510	ENSMUSG00000002668	ENSMUSG00000002668	Dennd1c	chr17:57066055-57078510	protein_coding	0.465811	0.606181	0.56161	0.686693	0.84382	0.636489	0.277156	0.325686	0.300728	0.515934	1.05828	0.606965
ENSMUSG00000002679_ENSMUSG00000002679_Med6_chr12:81573556-81595008	ENSMUSG00000002679	ENSMUSG00000002679	Med6	chr12:81573556-81595008	protein_coding	11.6542	9.30819	9.80953	11.9102	10.5749	9.76058	10.4515	9.05895	10.8282	8.69251	10.0531	11.08
ENSMUSG00000002688_ENSMUSG00000002688_Prkd1_chr12:50341230-50649223	ENSMUSG00000002688	ENSMUSG00000002688	Prkd1	chr12:50341230-50649223	protein_coding	4.31792	4.82927	4.92588	4.64353	5.67981	5.45965	5.45681	4.31831	5.87237	5.64839	5.20625	4.67309
ENSMUSG00000002699_ENSMUSG00000002699_Lcp2_chr11:34046919-34092295	ENSMUSG00000002699	ENSMUSG00000002699	Lcp2	chr11:34046919-34092295	protein_coding	0.884823	0.472206	0.592761	1.02979	1.09975	0.812484	0.912519	0.669317	1.24976	1.07673	1.50859	1.36088
ENSMUSG00000002718_ENSMUSG00000002718_Cse1l_chr2:166906039-166946389	ENSMUSG00000002718	ENSMUSG00000002718	Cse1l	chr2:166906039-166946389	protein_coding	10.612	10.5177	9.54331	9.90276	9.43674	10.189	10.8671	8.91712	9.9363	8.75293	8.83292	14.0858
ENSMUSG00000002728_ENSMUSG00000002728_Naa20_chr2:145902098-145916425	ENSMUSG00000002728	ENSMUSG00000002728	Naa20	chr2:145902098-145916425	protein_coding	44.5678	38.8263	38.6842	38.6971	40.6437	33.3548	83.682	88.3814	79.6631	58.4489	67.2604	66.9446
ENSMUSG00000002731_ENSMUSG00000002731_Prkra_chr2:76629897-76648015	ENSMUSG00000002731	ENSMUSG00000002731	Prkra	chr2:76629897-76648015	protein_coding	12.0408	11.9652	12.2107	12.5796	12.1359	12.3981	5.22009	3.55968	5.36617	4.48956	5.34629	5.0445
ENSMUSG00000002732_ENSMUSG00000002732_Fkbp7_chr2:76663043-76673116	ENSMUSG00000002732	ENSMUSG00000002732	Fkbp7	chr2:76663043-76673116	protein_coding	23.672	18.9303	17.8255	15.3381	18.2146	18.8203	12.7644	12.1455	12.2727	11.1932	8.9305	8.51718
ENSMUSG00000002733_ENSMUSG00000002733_Plekha3_chr2:76675280-76696828	ENSMUSG00000002733	ENSMUSG00000002733	Plekha3	chr2:76675280-76696828	protein_coding	7.91999	7.8144	7.71569	7.93697	7.27373	6.56113	9.83182	10.9921	9.39162	11.5374	11.0318	11.5795
ENSMUSG00000002741_ENSMUSG00000002741_Ykt6_chr11:5955692-5967780	ENSMUSG00000002741	ENSMUSG00000002741	Ykt6	chr11:5955692-5967780	protein_coding	27.8986	27.0738	27.2363	27.5452	28.7759	29.8185	31.1176	30.7047	30.2446	27.728	26.65	27.3075
ENSMUSG00000002748_ENSMUSG00000002748_Baz1b_chr5:135187263-135246129	ENSMUSG00000002748	ENSMUSG00000002748	Baz1b	chr5:135187263-135246129	protein_coding	17.0281	15.8546	16.7596	18.1077	19.5536	16.2725	24.8106	23.3531	24.5917	21.4078	22.4099	24.2314
ENSMUSG00000002763_ENSMUSG00000002763_Pex6_chr17:46711462-46725541	ENSMUSG00000002763	ENSMUSG00000002763	Pex6	chr17:46711462-46725541	protein_coding	47.9126	39.3707	50.5757	59.2388	61.0061	55.6034	31.1768	32.0057	34.9315	35.7156	30.5035	29.9249
ENSMUSG00000002767_ENSMUSG00000002767_Mrpl2_chr17:46646228-46650139	ENSMUSG00000002767	ENSMUSG00000002767	Mrpl2	chr17:46646228-46650139	protein_coding	80.014	77.3737	97.3983	94.8635	102.593	96.2586	57.9668	56.7687	63.0581	84.8913	71.1395	70.9966
ENSMUSG00000002768_ENSMUSG00000002768_Mea1_chr17:46681136-46683105	ENSMUSG00000002768	ENSMUSG00000002768	Mea1	chr17:46681136-46683105	protein_coding	44.9551	40.543	51.8965	43.6925	49.7794	46.1629	58.8527	64.1766	59.3469	53.4105	49.0159	51.3965
ENSMUSG00000002769_ENSMUSG00000002769_Gnmt_chr17:46725663-46729168	ENSMUSG00000002769	ENSMUSG00000002769	Gnmt	chr17:46725663-46729168	protein_coding	0.527536	0.4234	0.797367	1.34164	0.86611	0.338024	0.692602	0.903945	0.400346	0.305169	0.862428	0.597357
ENSMUSG00000002771_ENSMUSG00000002771_Grin2d_chr7:45831882-45870928	ENSMUSG00000002771	ENSMUSG00000002771	Grin2d	chr7:45831882-45870928	protein_coding	0.12697	0.241545	0.303413	0.343972	0.431576	0.33281	0.0782265	0.128439	0.0999824	0.165189	0.156367	0.173989
ENSMUSG00000002778_ENSMUSG00000002778_Kdelr1_chr7:45872771-45883731	ENSMUSG00000002778	ENSMUSG00000002778	Kdelr1	chr7:45872771-45883731	protein_coding	54.7921	45.4643	53.1127	50.438	51.9956	59.5105	45.9443	43.2411	48.3918	40.9269	36.4452	39.0147
ENSMUSG00000002781_ENSMUSG00000002781_Tmem143_chr7:45896940-45917413	ENSMUSG00000002781	ENSMUSG00000002781	Tmem143	chr7:45896940-45917413	protein_coding	81.6763	74.8017	89.622	80.8189	74.7458	76.5219	54.0468	55.0544	60.7238	60.5639	55.0918	55.2644
ENSMUSG00000002791_ENSMUSG00000002791_Pdxk-ps_chr17:32076082-32100286	ENSMUSG00000002791	ENSMUSG00000002791	Pdxk-ps	chr17:32076082-32100286		0	0	0.0264445	0.0323416	0	0	0	0	0	0	0	0
ENSMUSG00000002797_ENSMUSG00000002797_Ggct_chr6:54982579-54992950	ENSMUSG00000002797	ENSMUSG00000002797	Ggct	chr6:54982579-54992950	protein_coding	1.89133	1.37392	3.03346	1.28789	3.6098	2.6664	2.6639	1.8798	2.90503	3.07166	2.81123	2.59753
ENSMUSG00000002799_ENSMUSG00000002799_Jag2_chr12:112908589-112929495	ENSMUSG00000002799	ENSMUSG00000002799	Jag2	chr12:112908589-112929495	protein_coding	3.85742	3.69921	4.48512	4.32862	5.72198	3.37273	6.20364	7.16858	6.46953	10.2287	11.5115	9.42769
ENSMUSG00000002803_ENSMUSG00000002803_Btbd6_chr12:112976481-112978930	ENSMUSG00000002803	ENSMUSG00000002803	Btbd6	chr12:112976481-112978930	protein_coding	9.84132	8.38312	9.06605	11.5927	9.93195	10.3235	4.38214	4.20877	4.76717	4.00894	3.92934	5.00698
ENSMUSG00000002804_ENSMUSG00000002804_Nudt14_chr12:112934732-112942118	ENSMUSG00000002804	ENSMUSG00000002804	Nudt14	chr12:112934732-112942118	protein_coding	10.3029	6.9403	8.18931	10.0927	10.4424	8.34807	4.23766	4.52253	5.0133	7.30541	7.13353	5.47999
ENSMUSG00000002808_ENSMUSG00000002808_Epdr1_chr13:19591708-19619830	ENSMUSG00000002808	ENSMUSG00000002808	Epdr1	chr13:19591708-19619830	protein_coding	1.06494	1.25475	1.55477	1.99644	1.61897	1.22249	1.09636	1.805	1.35652	1.67318	1.75684	1.3264
ENSMUSG00000002812_ENSMUSG00000002812_Flii_chr11:60714122-60727263	ENSMUSG00000002812	ENSMUSG00000002812	Flii	chr11:60714122-60727263	protein_coding	44.5729	39.8128	47.9899	41.5392	45.5857	41.575	29.1999	28.7182	26.3939	31.605	29.9298	31.2289
ENSMUSG00000002814_ENSMUSG00000002814_Top3a_chr11:60740057-60777365	ENSMUSG00000002814	ENSMUSG00000002814	Top3a	chr11:60740057-60777365	protein_coding	1.9771	2.03332	2.02273	2.3133	2.32598	2.01788	1.13285	1.50773	0.872252	1.43209	1.67652	1.01123
ENSMUSG00000002820_ENSMUSG00000002820_Atg4d_chr9:21265298-21274368	ENSMUSG00000002820	ENSMUSG00000002820	Atg4d	chr9:21265298-21274368	protein_coding	9.65858	10.1523	11.1074	10.7996	10.9998	10.2124	27.2048	27.0048	29.4675	17.157	14.4947	15.2854
ENSMUSG00000002825_ENSMUSG00000002825_Qtrt1_chr9:21411836-21420277	ENSMUSG00000002825	ENSMUSG00000002825	Qtrt1	chr9:21411836-21420277	protein_coding	3.87265	2.58502	4.60143	3.78245	3.70483	3.90422	3.86529	5.02354	3.12045	5.88809	7.88474	7.78944
ENSMUSG00000002831_ENSMUSG00000002831_Plin4_chr17:56100590-56109802	ENSMUSG00000002831	ENSMUSG00000002831	Plin4	chr17:56100590-56109802	protein_coding	172.918	153.83	203.99	221.52	214.656	196.559	168.263	159.757	171.114	202.891	192.848	210.068
ENSMUSG00000002833_ENSMUSG00000002833_Hdgfrp2_chr17:56079656-56100596	ENSMUSG00000002833	ENSMUSG00000002833	Hdgfrp2	chr17:56079656-56100596	protein_coding	12.8523	12.073	14.5262	12.2618	13.1444	11.6253	5.27256	6.13955	7.22947	7.13363	7.24484	7.67548
ENSMUSG00000002835_ENSMUSG00000002835_Chaf1a_chr17:56040415-56068026	ENSMUSG00000002835	ENSMUSG00000002835	Chaf1a	chr17:56040415-56068026	protein_coding	0.64155	0.565168	0.856906	0.690599	0.653937	0.429652	0.169274	0.0540331	0.0841617	0.342266	0.303757	0.23974
ENSMUSG00000002844_ENSMUSG00000002844_Adprh_chr16:38445398-38452689	ENSMUSG00000002844	ENSMUSG00000002844	Adprh	chr16:38445398-38452689	protein_coding	15.9536	14.0115	18.5416	15.543	15.3634	14.8152	11.4113	11.954	10.9159	15.635	13.9385	15.5937
ENSMUSG00000002845_ENSMUSG00000002845_Tmem39a_chr16:38558697-38592162	ENSMUSG00000002845	ENSMUSG00000002845	Tmem39a	chr16:38558697-38592162	protein_coding	9.81954	9.1755	10.2944	11.1655	11.8978	11.7594	11.7581	11.9063	9.75218	10.2503	10.0031	12.7862
ENSMUSG00000002846_ENSMUSG00000002846_Timmdc1_chr16:38498346-38522663	ENSMUSG00000002846	ENSMUSG00000002846	Timmdc1	chr16:38498346-38522663	protein_coding	24.2249	21.9732	24.6471	21.8922	22.6894	20.9985	24.1282	24.5947	24.5823	23.4055	21.1426	20.5408
ENSMUSG00000002847_ENSMUSG00000002847_Pla1a_chr16:38396118-38433145	ENSMUSG00000002847	ENSMUSG00000002847	Pla1a	chr16:38396118-38433145	protein_coding	7.84004	6.51415	7.66999	9.42523	7.86336	7.6236	8.04887	7.816	8.81214	9.00867	9.20439	8.88719
ENSMUSG00000002870_ENSMUSG00000002870_Mcm2_chr6:88883474-88898780	ENSMUSG00000002870	ENSMUSG00000002870	Mcm2	chr6:88883474-88898780	protein_coding	1.33658	1.41847	1.43006	1.63809	1.30602	1.01984	0.792938	0.927094	0.715126	1.38422	1.17139	0.966294
ENSMUSG00000002871_ENSMUSG00000002871_Tpra1_chr6:88902250-88912238	ENSMUSG00000002871	ENSMUSG00000002871	Tpra1	chr6:88902250-88912238	protein_coding	13.6657	10.4028	16.5193	20.8775	14.0108	13.6717	9.24861	13.6371	6.73365	9.67392	11.4828	13.0212
ENSMUSG00000002881_ENSMUSG00000002881_Nab1_chr1:52457293-52500679	ENSMUSG00000002881	ENSMUSG00000002881	Nab1	chr1:52457293-52500679	protein_coding	13.1384	15.5888	13.6436	12.902	14.8818	12.8106	12.347	14.1118	12.7489	11.2586	11.9717	13.1225
ENSMUSG00000002885_ENSMUSG00000002885_Cd97_chr8:83723250-83741326	ENSMUSG00000002885	ENSMUSG00000002885	Cd97	chr8:83723250-83741326	protein_coding	24.9349	22.934	27.1454	38.4672	37.191	28.9031	35.7109	34.8161	34.1282	36.4615	42.1197	40.4567
ENSMUSG00000002897_ENSMUSG00000002897_Il17ra_chr6:120463196-120483727	ENSMUSG00000002897	ENSMUSG00000002897	Il17ra	chr6:120463196-120483727	protein_coding	1.10153	1.62077	1.35295	1.4873	1.29768	1.30464	2.31036	1.89332	2.05813	3.56197	3.75579	4.58849
ENSMUSG00000002900_ENSMUSG00000002900_Lamb1_chr12:31265233-31329644	ENSMUSG00000002900	ENSMUSG00000002900	Lamb1	chr12:31265233-31329644	protein_coding	24.8071	25.6581	28.3839	32.6195	36.159	41.0134	81.3372	77.9686	70.0935	83.5653	80.443	90.658
ENSMUSG00000002908_ENSMUSG00000002908_Kcnn1_chr8:70842048-70857008	ENSMUSG00000002908	ENSMUSG00000002908	Kcnn1	chr8:70842048-70857008	protein_coding	2.42113	1.91937	2.63842	2.43233	1.76307	2.46888	0.836835	0.983183	0.816573	1.41884	1.27759	1.1633
ENSMUSG00000002910_ENSMUSG00000002910_Arrdc2_chr8:70835154-70839720	ENSMUSG00000002910	ENSMUSG00000002910	Arrdc2	chr8:70835154-70839720	protein_coding	3.82733	3.60108	5.00189	4.39282	3.96138	3.61721	1.45518	2.24761	1.9664	2.43646	2.33623	2.10135
ENSMUSG00000002930_ENSMUSG00000002930_Ppp1r17_chr6:56017514-56032688	ENSMUSG00000002930	ENSMUSG00000002930	Ppp1r17	chr6:56017514-56032688	protein_coding	0	0	0	0	0	0	0	0	0	0	0	0
ENSMUSG00000002944_ENSMUSG00000002944_Cd36_chr5:17781689-17888959	ENSMUSG00000002944	ENSMUSG00000002944	Cd36	chr5:17781689-17888959	protein_coding	553.331	540.53	532.675	587.651	525.151	532.265	640.86	635.499	647.55	676.933	703.315	649.69
ENSMUSG00000002948_ENSMUSG00000002948_Map2k7_chr8:4238739-4251423	ENSMUSG00000002948	ENSMUSG00000002948	Map2k7	chr8:4238739-4251423	protein_coding	18.3313	17.2949	20.3905	21.147	19.8348	17.8227	14.5981	13.3084	14.048	14.8503	14.2043	15.0749
ENSMUSG00000002949_ENSMUSG00000002949_Timm44_chr8:4259730-4275913	ENSMUSG00000002949	ENSMUSG00000002949	Timm44	chr8:4259730-4275913	protein_coding	102.272	105.633	114.425	99.3548	107.425	101.425	86.7375	84.8847	85.3511	104.512	94.223	99.0526
ENSMUSG00000002957_ENSMUSG00000002957_Ap2a2_chr7:141562179-141633011	ENSMUSG00000002957	ENSMUSG00000002957	Ap2a2	chr7:141562179-141633011	protein_coding	24.5615	24.1846	27.1968	22.8112	23.2438	24.3402	27.4771	24.9155	24.7442	22.702	23.1626	22.9859
ENSMUSG00000002963_ENSMUSG00000002963_Pnkp_chr7:44857138-44862925	ENSMUSG00000002963	ENSMUSG00000002963	Pnkp	chr7:44857138-44862925	protein_coding	11.6693	10.8572	13.3582	12.9462	12.7412	11.0611	6.66947	8.95198	9.56004	9.84548	8.57	9.32493
ENSMUSG00000002968_ENSMUSG00000002968_Med25_chr7:44879390-44892397	ENSMUSG00000002968	ENSMUSG00000002968	Med25	chr7:44879390-44892397	protein_coding	15.147	13.1825	17.7464	16.4854	15.513	13.6169	12.07	11.0091	12.9769	14.0809	12.2499	13.9072
ENSMUSG00000002980_ENSMUSG00000002980_Bcam_chr7:19756130-19771016	ENSMUSG00000002980	ENSMUSG00000002980	Bcam	chr7:19756130-19771016	protein_coding	21.707	23.241	24.9547	20.4554	27.9171	19.4736	9.85169	12.5802	11.2488	15.9081	14.9324	12.4382
ENSMUSG00000002981_ENSMUSG00000002981_Clptm1_chr7:19631580-19665030	ENSMUSG00000002981	ENSMUSG00000002981	Clptm1	chr7:19631580-19665030	protein_coding	21.9989	21.4734	24.8764	24.694	24.2261	24.618	30.6415	32.3722	32.6535	26.2356	26.0522	25.1873
ENSMUSG00000002983_ENSMUSG00000002983_Relb_chr7:19606216-19629438	ENSMUSG00000002983	ENSMUSG00000002983	Relb	chr7:19606216-19629438	protein_coding	8.7497	11.0114	11.2283	10.0989	9.53196	10.8133	6.54651	4.84917	4.00326	9.16815	7.49201	10.6748
ENSMUSG00000002984_ENSMUSG00000002984_Tomm40_chr7:19701312-19715438	ENSMUSG00000002984	ENSMUSG00000002984	Tomm40	chr7:19701312-19715438	protein_coding	47.1879	50.1526	52.119	48.8878	53.8188	51.0319	65.4396	69.8069	69.9473	65.9804	63.6021	64.0137
ENSMUSG00000002985_ENSMUSG00000002985_Apoe_chr7:19696108-19699166	ENSMUSG00000002985	ENSMUSG00000002985	Apoe	chr7:19696108-19699166	protein_coding	2167.51	1923.75	2518.8	3529.12	3310.54	2777.14	1564.8	1514.54	1518.68	2711.77	2267.23	2481.34
ENSMUSG00000002992_ENSMUSG00000002992_Apoc2_chr7:19671578-19681423	ENSMUSG00000002992	ENSMUSG00000002992	Apoc2	chr7:19671578-19681423	protein_coding	0.227985	0	0.261601	0.567854	0.526404	0.577532	1.22015	0.777098	0.474824	0.464421	0.880209	1.16389
ENSMUSG00000002996_ENSMUSG00000002996_Hbp1_chr12:31926253-31950535	ENSMUSG00000002996	ENSMUSG00000002996	Hbp1	chr12:31926253-31950535	protein_coding	37.2261	42.48	45.5082	48.6553	45.2256	45.8471	35.9175	34.3177	32.6079	30.1285	29.6123	34.2128
ENSMUSG00000002997_ENSMUSG00000002997_Prkar2b_chr12:31958475-32061296	ENSMUSG00000002997	ENSMUSG00000002997	Prkar2b	chr12:31958475-32061296	protein_coding	405.305	389.67	372.142	384.071	380.555	397.275	303.683	295.652	349.797	285.448	262.571	233.706
ENSMUSG00000003031_ENSMUSG00000003031_Cdkn1b_chr6:134920400-134925513	ENSMUSG00000003031	ENSMUSG00000003031	Cdkn1b	chr6:134920400-134925513	protein_coding	16.2472	18.5596	16.1038	16.9187	15.8592	16.3135	6.06285	6.52456	6.76003	7.88781	8.67037	8.83326
ENSMUSG00000003032_ENSMUSG00000003032_Klf4_chr4:55527142-55532466	ENSMUSG00000003032	ENSMUSG00000003032	Klf4	chr4:55527142-55532466	protein_coding	5.44327	10.5617	9.67911	12.0295	12.0546	13.1171	21.9627	19.99	19.3566	28.9188	25.3666	25.9586
ENSMUSG00000003033_ENSMUSG00000003033_Ap1m1_chr8:72240017-72257385	ENSMUSG00000003033	ENSMUSG00000003033	Ap1m1	chr8:72240017-72257385	protein_coding	30.4887	29.9902	32.685	31.9637	32.454	30.819	23.8	26.347	24.0646	24.0866	21.9187	23.0642
ENSMUSG00000003037_ENSMUSG00000003037_Rab8a_chr8:72161199-72183904	ENSMUSG00000003037	ENSMUSG00000003037	Rab8a	chr8:72161199-72183904	protein_coding	25.8432	23.4616	27.4293	29.7867	25.5092	24.3854	32.9716	29.2223	30.2927	28.8539	25.1106	32.4955
ENSMUSG00000003038_ENSMUSG00000003038_Hmgn2_chr4:133964737-133968650	ENSMUSG00000003038	ENSMUSG00000003038	Hmgn2	chr4:133964737-133968650	protein_coding	33.0236	23.9738	33.54	43.5915	41.9203	35.6145	14.1665	13.6221	13.4901	24.9171	21.5185	21.2279
ENSMUSG00000003039_ENSMUSG00000003039_Fam32a_chr8:72219729-72223764	ENSMUSG00000003039	ENSMUSG00000003039	Fam32a	chr8:72219729-72223764	protein_coding	30.1654	30.134	35.2346	31.5728	35.0621	35.0184	37.1912	40.2994	43.4664	32.5969	30.1257	33.5449
ENSMUSG00000003051_ENSMUSG00000003051_Elf3_chr1:135253573-135258472	ENSMUSG00000003051	ENSMUSG00000003051	Elf3	chr1:135253573-135258472	protein_coding	0.0462139	0	0	0	0	0	0	0	0	0	0	0
ENSMUSG00000003053_ENSMUSG00000003053_Cyp2c29_chr19:39269404-39330713	ENSMUSG00000003053	ENSMUSG00000003053	Cyp2c29	chr19:39269404-39330713	protein_coding	0	0	0	0	0	0	0	0	0	0	0	0
ENSMUSG00000003062_ENSMUSG00000003062_Stard3nl_chr13:19357676-19395752	ENSMUSG00000003062	ENSMUSG00000003062	Stard3nl	chr13:19357676-19395752	protein_coding	5.92606	5.99463	6.53026	6.47164	5.42915	4.94558	3.50803	3.5635	3.78864	4.73211	4.48107	3.52644
ENSMUSG00000003068_ENSMUSG00000003068_Stk11_chr10:80115802-80130682	ENSMUSG00000003068	ENSMUSG00000003068	Stk11	chr10:80115802-80130682	protein_coding	58.5701	64.6745	72.5041	76.5072	81.7502	72.7023	80.4199	75.4925	75.7901	64.806	66.109	63.8476
ENSMUSG00000003070_ENSMUSG00000003070_Efna2_chr10:80179481-80190010	ENSMUSG00000003070	ENSMUSG00000003070	Efna2	chr10:80179481-80190010	protein_coding	0.68912	0.546564	0.674597	0.358824	0.663009	0.728582	0.0605425	0.0869441	0.0903437	0.309982	0.260868	0.0429138
ENSMUSG00000003072_ENSMUSG00000003072_Atp5d_chr10:80138631-80145818	ENSMUSG00000003072	ENSMUSG00000003072	Atp5d	chr10:80138631-80145818	protein_coding	562.01	512.447	662.576	575.082	591.183	575.238	590.183	613.292	607.943	585.484	525.929	529.064
ENSMUSG00000003099_ENSMUSG00000003099_Ppp5c_chr7:17004639-17027924	ENSMUSG00000003099	ENSMUSG00000003099	Ppp5c	chr7:17004639-17027924	protein_coding	35.5194	32.9974	42.7319	43.3244	36.0853	42.1067	48.2255	49.1196	53.1866	48.8879	43.3155	37.4604
ENSMUSG00000003119_ENSMUSG00000003119_Cdk12_chr11:98203058-98278504	ENSMUSG00000003119	ENSMUSG00000003119	Cdk12	chr11:98203058-98278504	protein_coding	5.19561	7.51074	5.52133	7.11273	6.66313	6.09199	7.3341	6.89078	6.31882	7.09686	7.55421	8.3212
ENSMUSG00000003123_ENSMUSG00000003123_Lipe_chr7:25379526-25398710	ENSMUSG00000003123	ENSMUSG00000003123	Lipe	chr7:25379526-25398710	protein_coding	510.598	513.015	574.171	511.929	561.797	514.175	315.141	286.503	302.375	341.448	319.245	339.168
ENSMUSG00000003131_ENSMUSG00000003131_Pafah1b2_chr9:45965310-45984871	ENSMUSG00000003131	ENSMUSG00000003131	Pafah1b2	chr9:45965310-45984871	protein_coding	8.73428	8.48043	9.01822	9.72937	10.0387	8.74534	14.4515	14.5675	13.1814	13.3742	14.2331	13.7321
ENSMUSG00000003134_ENSMUSG00000003134_Tbc1d8_chr1:39371498-39478747	ENSMUSG00000003134	ENSMUSG00000003134	Tbc1d8	chr1:39371498-39478747	protein_coding	3.19545	3.00036	3.33162	2.92485	3.67774	3.16776	1.84921	1.38773	2.1403	1.3182	1.73804	1.44571
ENSMUSG00000003135_ENSMUSG00000003135_Cnot11_chr1:39534991-39546881	ENSMUSG00000003135	ENSMUSG00000003135	Cnot11	chr1:39534991-39546881	protein_coding	4.6087	4.51391	4.39982	4.46445	4.30503	3.17871	4.76335	5.18749	5.10749	4.37651	4.61132	3.69051
ENSMUSG00000003153_ENSMUSG00000003153_Slc2a3_chr6:122727808-122801640	ENSMUSG00000003153	ENSMUSG00000003153	Slc2a3	chr6:122727808-122801640	protein_coding	1.06005	1.09198	1.57265	1.59921	1.00393	1.16326	0.836065	1.125	1.43142	1.95973	2.34686	2.73401
ENSMUSG00000003154_ENSMUSG00000003154_Foxj2_chr6:122819913-122845366	ENSMUSG00000003154	ENSMUSG00000003154	Foxj2	chr6:122819913-122845366	protein_coding	4.96053	5.48258	5.97686	5.7329	6.38619	5.13874	3.84582	4.26138	3.944	4.25705	4.60358	4.10111
ENSMUSG00000003161_ENSMUSG00000003161_Sri_chr5:8046077-8069379	ENSMUSG00000003161	ENSMUSG00000003161	Sri	chr5:8046077-8069379	protein_coding	55.8149	50.7768	61.3074	60.1965	63.7413	52.4507	32.5772	30.5589	29.1895	47.1225	46.9691	48.7921
ENSMUSG00000003166_ENSMUSG00000003166_Dgcr2_chr16:17839481-17894145	ENSMUSG00000003166	ENSMUSG00000003166	Dgcr2	chr16:17839481-17894145	protein_coding	14.2352	13.9671	15.9565	18.0686	18.1125	17.8327	11.5857	12.1115	12.194	13.2504	12.1732	12.3281
ENSMUSG00000003178_ENSMUSG00000003178_Mical3_chr6:121007240-121081609	ENSMUSG00000003178	ENSMUSG00000003178	Mical3	chr6:121007240-121081609	protein_coding	9.13421	8.29974	10.6247	9.23175	10.0919	9.42351	8.37869	8.60506	8.83985	8.6663	9.44302	10.9162
ENSMUSG00000003184_ENSMUSG00000003184_Irf3_chr7:44997647-45002848	ENSMUSG00000003184	ENSMUSG00000003184	Irf3	chr7:44997647-45002848	protein_coding	28.9939	25.053	32.4596	29.7848	31.3146	24.696	30.5232	25.9417	28.7484	31.1278	31.6448	27.8071
ENSMUSG00000003190_ENSMUSG00000003190_Bcl2l12_chr7:44991221-44998712	ENSMUSG00000003190	ENSMUSG00000003190	Bcl2l12	chr7:44991221-44998712	protein_coding	6.65336	6.47635	8.15992	6.18485	6.8127	6.87644	2.60209	3.09672	2.15835	4.3123	4.00105	3.67853
ENSMUSG00000003198_ENSMUSG00000003198_Zfp959_chr17:55892183-55898584	ENSMUSG00000003198	ENSMUSG00000003198	Zfp959	chr17:55892183-55898584	protein_coding	1.55364	1.43888	1.69431	1.36721	1.45911	1.23125	1.37896	2.06852	1.47482	1.53833	1.10905	1.40179
ENSMUSG00000003199_ENSMUSG00000003199_Mpnd_chr17:56005710-56016790	ENSMUSG00000003199	ENSMUSG00000003199	Mpnd	chr17:56005710-56016790	protein_coding	44.221	37.8548	52.3111	54.7378	53.6697	46.3806	40.6883	41.133	40.9771	41.5757	36.2779	38.6931
ENSMUSG00000003200_ENSMUSG00000003200_Sh3gl1_chr17:56016752-56036637	ENSMUSG00000003200	ENSMUSG00000003200	Sh3gl1	chr17:56016752-56036637	protein_coding	8.30866	7.25496	8.80375	10.3644	10.3394	8.41793	10.6478	9.41664	9.92518	11.0851	10.8649	10.005
ENSMUSG00000003206_ENSMUSG00000003206_Ebi3_chr17:55952622-55957021	ENSMUSG00000003206	ENSMUSG00000003206	Ebi3	chr17:55952622-55957021	protein_coding	0.343909	0.509645	0.641432	0.71569	1.24372	0.872276	0.180767	0.345916	0.4501	0.0686284	0.584922	0.171272
ENSMUSG00000003208_ENSMUSG00000003208_Ccdc94_chr17:55959186-55967949	ENSMUSG00000003208	ENSMUSG00000003208	Ccdc94	chr17:55959186-55967949	protein_coding	4.20072	3.81037	5.75492	5.24625	4.07079	4.0593	4.3666	5.13519	4.243	4.85227	4.42462	3.21303
ENSMUSG00000003226_ENSMUSG00000003226_Ranbp2_chr10:58446851-58494155	ENSMUSG00000003226	ENSMUSG00000003226	Ranbp2	chr10:58446851-58494155	protein_coding	6.11858	6.15556	5.33532	6.43579	5.45001	5.41911	11.0779	11.1453	10.6158	9.80024	9.9274	10.3952
ENSMUSG00000003227_ENSMUSG00000003227_Edar_chr10:58600788-58675654	ENSMUSG00000003227	ENSMUSG00000003227	Edar	chr10:58600788-58675654	protein_coding	0.0241685	0	0	0.0201426	0	0	0	0	0	0	0	0
ENSMUSG00000003228_ENSMUSG00000003228_Grk5_chr19:60889748-61092553	ENSMUSG00000003228	ENSMUSG00000003228	Grk5	chr19:60889748-61092553	protein_coding	6.05293	5.69978	6.09628	5.06764	5.68712	5.31004	5.26398	4.09209	5.58749	6.87294	6.68679	5.80831
ENSMUSG00000003233_ENSMUSG00000003233_Dvl3_chr16:20516981-20532520	ENSMUSG00000003233	ENSMUSG00000003233	Dvl3	chr16:20516981-20532520	protein_coding	10.1083	10.801	14.7039	12.9494	13.2674	12.3491	17.6382	16.4689	18.304	11.8343	12.029	12.9312
ENSMUSG00000003234_ENSMUSG00000003234_Abcf3_chr16:20548576-20561379	ENSMUSG00000003234	ENSMUSG00000003234	Abcf3	chr16:20548576-20561379	protein_coding	17.2814	14.962	16.6002	15.8413	16.6278	16.6309	19.6327	17.4955	18.9857	20.6588	19.1865	19.2691
ENSMUSG00000003235_ENSMUSG00000003235_Eif2b5_chr16:20498816-20509955	ENSMUSG00000003235	ENSMUSG00000003235	Eif2b5	chr16:20498816-20509955	protein_coding	15.2972	16.0799	15.2419	15.6524	15.7632	14.706	18.6279	18.5631	17.9586	15.898	16.3246	17.2226
ENSMUSG00000003269_ENSMUSG00000003269_Cyth2_chr7:45806636-45814581	ENSMUSG00000003269	ENSMUSG00000003269	Cyth2	chr7:45806636-45814581	protein_coding	14.4828	11.6488	17.8345	14.8064	20.4547	17.786	22.3897	22.4619	21.8788	17.5303	19.312	16.8695
ENSMUSG00000003271_ENSMUSG00000003271_Sult2b1_chr7:45729982-45759612	ENSMUSG00000003271	ENSMUSG00000003271	Sult2b1	chr7:45729982-45759612	protein_coding	0.0839604	0	0.163276	0.133212	0.151839	0	0.112186	0	0.175845	0.213411	0	0
ENSMUSG00000003273_ENSMUSG00000003273_Car11_chr7:45699842-45704682	ENSMUSG00000003273	ENSMUSG00000003273	Car11	chr7:45699842-45704682	protein_coding	4.57536	6.3814	5.75297	5.17977	7.31151	6.95054	2.21692	3.54461	3.32726	2.44922	2.36259	2.26347
ENSMUSG00000003279_ENSMUSG00000003279_Dlgap1_chr17:69969072-70821413	ENSMUSG00000003279	ENSMUSG00000003279	Dlgap1	chr17:69969072-70821413	protein_coding	0.869482	0.898163	0.680311	0.842134	0.707052	0.695133	0.76273	0.669165	0.529619	0.426536	0.430952	0.654373
ENSMUSG00000003282_ENSMUSG00000003282_Plag1_chr4:3900995-3938423	ENSMUSG00000003282	ENSMUSG00000003282	Plag1	chr4:3900995-3938423	protein_coding	0.254151	0.715463	0.235446	0.681088	0.34552	0.383959	0.115366	0.091801	0.0762335	0.101729	0.206352	0.0723658
ENSMUSG00000003283_ENSMUSG00000003283_Hck_chr2:153108467-153151441	ENSMUSG00000003283	ENSMUSG00000003283	Hck	chr2:153108467-153151441	protein_coding	0.483564	0.669448	0.688484	0.512729	0.636887	0.632091	0.648798	0.754247	1.1065	1.05459	1.46438	1.40162
ENSMUSG00000003299_ENSMUSG00000003299_Mrpl4_chr9:21002736-21008835	ENSMUSG00000003299	ENSMUSG00000003299	Mrpl4	chr9:21002736-21008835	protein_coding	66.8328	61.7862	72.9001	68.1144	71.0044	69.7594	66.9067	69.9016	73.2191	74.6538	70.1705	66.3428
ENSMUSG00000003308_ENSMUSG00000003308_Keap1_chr9:21229729-21239332	ENSMUSG00000003308	ENSMUSG00000003308	Keap1	chr9:21229729-21239332	protein_coding	13.3376	13.3151	15.3115	14.0077	15.2589	13.6906	11.1895	10.3565	11.2851	10.1502	10.9193	9.66959
ENSMUSG00000003309_ENSMUSG00000003309_Ap1m2_chr9:21295456-21312333	ENSMUSG00000003309	ENSMUSG00000003309	Ap1m2	chr9:21295456-21312333	protein_coding	0	0	0	0	0	0	0	0	0	0	0.0410341	0
ENSMUSG00000003316_ENSMUSG00000003316_Glg1_chr8:111154420-111259216	ENSMUSG00000003316	ENSMUSG00000003316	Glg1	chr8:111154420-111259216	protein_coding	10.8213	11.0811	11.8445	11.1053	10.5697	9.78082	7.62289	8.88001	7.45722	10.39	10.1004	11.9911
ENSMUSG00000003341_ENSMUSG00000003341_Atp8b3_chr10:80519584-80539124	ENSMUSG00000003341	ENSMUSG00000003341	Atp8b3	chr10:80519584-80539124	protein_coding	0.0197205	0.0500255	0.0403781	0.0493111	0	0.0333674	0.013882	0.0398848	0	0.0315721	0.0149433	0.0393054
ENSMUSG00000003344_ENSMUSG00000003344_Btbd2_chr10:80642616-80657071	ENSMUSG00000003344	ENSMUSG00000003344	Btbd2	chr10:80642616-80657071	protein_coding	20.133	21.3252	24.4051	20.8275	20.4539	20.5373	7.28011	5.52707	7.79284	8.3949	5.82035	8.47656
ENSMUSG00000003345_ENSMUSG00000003345_Csnk1g2_chr10:80622779-80640771	ENSMUSG00000003345	ENSMUSG00000003345	Csnk1g2	chr10:80622779-80640771	protein_coding	30.0072	29.115	34.1106	31.8682	33.3919	30.0892	24.2709	21.9374	25.1662	25.7877	22.7515	22.6107
ENSMUSG00000003346_ENSMUSG00000003346_Abhd17a_chr10:80583648-80590341	ENSMUSG00000003346	ENSMUSG00000003346	Abhd17a	chr10:80583648-80590341	protein_coding	33.0404	30.0152	37.4801	33.9436	37.1755	35.7961	28.2152	30.7836	30.3715	28.2783	25.6379	25.2237
ENSMUSG00000003348_ENSMUSG00000003348_Mob3a_chr10:80685255-80701820	ENSMUSG00000003348	ENSMUSG00000003348	Mob3a	chr10:80685255-80701820	protein_coding	1.83652	2.27257	2.59619	2.86225	2.80338	2.73299	2.75054	1.92373	2.10525	2.72077	3.58028	3.79555
ENSMUSG00000003352_ENSMUSG00000003352_Cacnb3_chr15:98632219-98644530	ENSMUSG00000003352	ENSMUSG00000003352	Cacnb3	chr15:98632219-98644530	protein_coding	0.454609	0.540794	0.71103	0.785128	0.792523	0.569295	0.520649	0.513322	0.282444	0.539352	1.06626	0.722225
ENSMUSG00000003354_ENSMUSG00000003354_Ccdc65_chr15:98708206-98723326	ENSMUSG00000003354	ENSMUSG00000003354	Ccdc65	chr15:98708206-98723326	protein_coding	0.196926	0	0.0335066	0.0410106	0.0445699	0.041638	0.0345875	0	0	0.0393593	0.0745298	0.0490505
ENSMUSG00000003355_ENSMUSG00000003355_Fkbp11_chr15:98724372-98728198	ENSMUSG00000003355	ENSMUSG00000003355	Fkbp11	chr15:98724372-98728198	protein_coding	1.42004	1.87353	1.0629	2.0985	1.99195	2.53275	0.990476	1.89345	1.64734	2.13449	2.49809	1.25652
ENSMUSG00000003360_ENSMUSG00000003360_Ddx23_chr15:98645133-98662889	ENSMUSG00000003360	ENSMUSG00000003360	Ddx23	chr15:98645133-98662889	protein_coding	29.4247	29.5397	39.2377	30.0657	33.4933	36.7452	31.9046	28.9703	26.8716	28.3289	27.9724	29.5754
ENSMUSG00000003363_ENSMUSG00000003363_Pld3_chr7:27531999-27553218	ENSMUSG00000003363	ENSMUSG00000003363	Pld3	chr7:27531999-27553218	protein_coding	17.5157	13.8813	19.0306	18.3463	18.3604	18.0565	13.291	17.9168	12.9828	14.2784	14.8711	16.3742
ENSMUSG00000003378_ENSMUSG00000003378_Grik5_chr7:25009852-25072369	ENSMUSG00000003378	ENSMUSG00000003378	Grik5	chr7:25009852-25072369	protein_coding	6.22492	4.88731	6.46834	4.68361	5.4546	5.72031	0.691318	0.831415	1.10298	1.09702	1.17694	1.11547
ENSMUSG00000003379_ENSMUSG00000003379_Cd79a_chr7:24897380-24902197	ENSMUSG00000003379	ENSMUSG00000003379	Cd79a	chr7:24897380-24902197	protein_coding	0.795154	0.392613	0.225126	0.331078	0.359709	0.56033	0.0930001	0	0.277731	0.15881	0	0
ENSMUSG00000003380_ENSMUSG00000003380_Rabac1_chr7:24969749-24972728	ENSMUSG00000003380	ENSMUSG00000003380	Rabac1	chr7:24969749-24972728	protein_coding	164.229	158.501	198.453	169.469	189.204	177.001	132.427	143.073	133.043	151.309	135.938	132.943
ENSMUSG00000003382_ENSMUSG00000003382_Etv3_chr3:87525406-87540156	ENSMUSG00000003382	ENSMUSG00000003382	Etv3	chr3:87525406-87540156	protein_coding	8.24265	8.49071	9.28517	9.91377	10.0533	9.41733	9.69231	9.51089	9.12447	8.74002	9.06086	9.62358
ENSMUSG00000003402_ENSMUSG00000003402_Prkcsh_chr9:22003034-22014219	ENSMUSG00000003402	ENSMUSG00000003402	Prkcsh	chr9:22003034-22014219	protein_coding	27.9997	25.5946	31.7115	31.9903	33.3929	32.9409	37.2299	39.8109	40.56	31.0342	28.3928	29.1031
ENSMUSG00000003410_ENSMUSG00000003410_Elavl3_chr9:22015004-22052023	ENSMUSG00000003410	ENSMUSG00000003410	Elavl3	chr9:22015004-22052023	protein_coding	0.103207	0.101808	0.0469706	0.0573512	0.0935429	0.0873156	0.193768	0.278371	0.198649	0.0963954	0.143389	0.0685692
ENSMUSG00000003411_ENSMUSG00000003411_Rab3b_chr4:108879062-108943324	ENSMUSG00000003411	ENSMUSG00000003411	Rab3b	chr4:108879062-108943324	protein_coding	0.293534	0.277635	0.331438	0.651896	0.0884239	0.292138	0.0683959	0.0982911	0	0	0	0
ENSMUSG00000003418_ENSMUSG00000003418_St8sia6_chr2:13651019-13793808	ENSMUSG00000003418	ENSMUSG00000003418	St8sia6	chr2:13651019-13793808	protein_coding	0.324462	0.664497	0.403675	0.367065	0.470088	0.401972	0.355349	0.363499	0.281984	0.408298	0.807025	0.800341
ENSMUSG00000003420_ENSMUSG00000003420_Fcgrt_chr7:45092992-45103822	ENSMUSG00000003420	ENSMUSG00000003420	Fcgrt	chr7:45092992-45103822	protein_coding	125.761	115.03	145.63	152.935	136.119	138.303	116.144	118.909	125.77	117.607	104.922	96.3425
ENSMUSG00000003421_ENSMUSG00000003421_Nosip_chr7:45062428-45078503	ENSMUSG00000003421	ENSMUSG00000003421	Nosip	chr7:45062428-45078503	protein_coding	22.775	24.2609	27.9862	26.1149	29.3243	22.6318	15.149	15.5139	14.5786	12.3274	14.209	17.928
ENSMUSG00000003423_ENSMUSG00000003423_Pih1d1_chr7:45154302-45160069	ENSMUSG00000003423	ENSMUSG00000003423	Pih1d1	chr7:45154302-45160069	protein_coding	33.2556	29.0314	39.1825	27.7745	30.6675	35.5899	27.4197	25.2976	30.3309	27.2109	28.3661	28.9294
ENSMUSG00000003429_ENSMUSG00000003429_Rps11_chr7:45122387-45124389	ENSMUSG00000003429	ENSMUSG00000003429	Rps11	chr7:45122387-45124389	protein_coding	441.443	404.809	449.266	487.833	505.083	462.222	477.48	548.15	488.184	486.278	489.804	460.446
ENSMUSG00000003435_ENSMUSG00000003435_Supt5_chr7:28314897-28338719	ENSMUSG00000003435	ENSMUSG00000003435	Supt5	chr7:28314897-28338719	protein_coding	19.5818	18.1733	23.1364	21.7387	22.4292	19.4325	32.0635	31.0097	33.7791	27.7062	30.5454	30.1961
ENSMUSG00000003436_ENSMUSG00000003436_Dll3_chr7:28293552-28302238	ENSMUSG00000003436	ENSMUSG00000003436	Dll3	chr7:28293552-28302238	protein_coding	0	0.029077	0	0	0	0.152405	0.0483499	0	0	0	0.0260347	0
ENSMUSG00000003437_ENSMUSG00000003437_Paf1_chr7:28392950-28399388	ENSMUSG00000003437	ENSMUSG00000003437	Paf1	chr7:28392950-28399388	protein_coding	35.7717	34.3803	43.4796	31.8081	39.79	37.8288	44.4551	43.2659	43.1472	48.658	44.4687	41.8293
ENSMUSG00000003438_ENSMUSG00000003438_Timm50_chr7:28305515-28312072	ENSMUSG00000003438	ENSMUSG00000003438	Timm50	chr7:28305515-28312072	protein_coding	55.5087	48.5559	59.7026	69.1226	61.2277	60.0247	65.56	64.2458	61.0278	70.743	62.3404	65.4865
ENSMUSG00000003444_ENSMUSG00000003444_Med29_chr7:28386145-28392708	ENSMUSG00000003444	ENSMUSG00000003444	Med29	chr7:28386145-28392708	protein_coding	6.2455	5.74468	6.22828	6.99721	5.85762	6.19345	13.1389	14.1251	15.5057	11.1441	11.719	10.3686
ENSMUSG00000003452_ENSMUSG00000003452_Bicd1_chr6:149408983-149563329	ENSMUSG00000003452	ENSMUSG00000003452	Bicd1	chr6:149408983-149563329	protein_coding	0.0950013	0.0404771	0.0479236	0.19396	0.172354	0.107109	0.0455626	0.0950354	0.06661	0.124934	0.143201	0.094525
ENSMUSG00000003458_ENSMUSG00000003458_Ncstn_chr1:172066012-172082795	ENSMUSG00000003458	ENSMUSG00000003458	Ncstn	chr1:172066012-172082795	protein_coding	21.6252	21.6426	22.3753	20.1319	20.2236	20.9865	15.6799	17.9717	16.7546	16.0804	17.2688	17.7413
ENSMUSG00000003464_ENSMUSG00000003464_Pex19_chr1:172126754-172136493	ENSMUSG00000003464	ENSMUSG00000003464	Pex19	chr1:172126754-172136493	protein_coding	92.0922	97.7119	99.5941	89.1253	93.2818	87.8576	116.679	118.994	123.801	101.508	97.4482	98.4423
ENSMUSG00000003469_ENSMUSG00000003469_Phyhip_chr14:70457475-70468832	ENSMUSG00000003469	ENSMUSG00000003469	Phyhip	chr14:70457475-70468832	protein_coding	0.0945105	0.0266455	0.171818	0.157512	0.0856166	0.432164	0.0664769	0.0318274	0.033056	0	0.0954462	0.0941766
ENSMUSG00000003476_ENSMUSG00000003476_Crhr2_chr6:55090048-55133016	ENSMUSG00000003476	ENSMUSG00000003476	Crhr2	chr6:55090048-55133016	protein_coding	0.066626	0.223043	0.285807	0.374776	0.467064	0.298145	0.275699	0.471125	0.209723	0.133256	0.252464	0.15608
ENSMUSG00000003477_ENSMUSG00000003477_Inmt_chr6:55170625-55175043	ENSMUSG00000003477	ENSMUSG00000003477	Inmt	chr6:55170625-55175043	protein_coding	8.60624	3.17369	9.98278	9.24402	7.62448	8.02551	0.933013	0.57381	0.446593	0.986977	0	0.663361
ENSMUSG00000003484_ENSMUSG00000003484_Cyp4f18_chr8:71988481-72009626	ENSMUSG00000003484	ENSMUSG00000003484	Cyp4f18	chr8:71988481-72009626	protein_coding	0.482561	0.177087	0.11308	0.276939	0.150472	0.0468655	0.389162	0.199628	0.483467	0.354333	1.34211	1.23152
ENSMUSG00000003500_ENSMUSG00000003500_Impdh1_chr6:29200433-29216364	ENSMUSG00000003500	ENSMUSG00000003500	Impdh1	chr6:29200433-29216364	protein_coding	340.657	247.153	362.396	256.903	273.32	224.986	95.4806	96.7024	78.8352	134.135	105.226	138.912
ENSMUSG00000003505_ENSMUSG00000003505_Psg18_chr7:18345421-18355009	ENSMUSG00000003505	ENSMUSG00000003505	Psg18	chr7:18345421-18355009	protein_coding	0	0	0	0	0	0	0	0	0	0	0	0
ENSMUSG00000003518_ENSMUSG00000003518_Dusp3_chr11:101971142-101987013	ENSMUSG00000003518	ENSMUSG00000003518	Dusp3	chr11:101971142-101987013	protein_coding	35.5732	36.4425	42.3287	42.5852	43.1402	34.883	46.4477	38.3743	49.1412	52.5286	54.9737	57.6312
ENSMUSG00000003526_ENSMUSG00000003526_Prodh_chr16:18060356-18090203	ENSMUSG00000003526	ENSMUSG00000003526	Prodh	chr16:18060356-18090203	protein_coding	8.02676	6.57498	9.27007	13.6395	8.77673	11.6471	6.46318	7.27763	7.52381	15.422	13.4581	10.9579
ENSMUSG00000003527_ENSMUSG00000003527_Dgcr14_chr16:17900710-17911348	ENSMUSG00000003527	ENSMUSG00000003527	Dgcr14	chr16:17900710-17911348	protein_coding	4.82334	4.48216	5.51638	5.09024	4.77185	4.59011	2.9462	3.83096	2.89676	4.56992	4.01381	3.82606
ENSMUSG00000003528_ENSMUSG00000003528_Slc25a1_chr16:17925210-17928219	ENSMUSG00000003528	ENSMUSG00000003528	Slc25a1	chr16:17925210-17928219	protein_coding	315.736	402.258	325.939	127.628	385.547	381.585	236.274	174.768	311.245	67.0283	52.3745	51.1959
ENSMUSG00000003531_ENSMUSG00000003531_Dgcr6_chr16:18052859-18071632	ENSMUSG00000003531	ENSMUSG00000003531	Dgcr6	chr16:18052859-18071632	protein_coding	47.1448	45.2393	51.2344	49.6225	52.654	47.7153	39.6715	40.3872	47.6262	35.8632	30.6299	32.5275
ENSMUSG00000003534_ENSMUSG00000003534_Ddr1_chr17:35681566-35704621	ENSMUSG00000003534	ENSMUSG00000003534	Ddr1	chr17:35681566-35704621	protein_coding	3.29414	2.65737	4.45925	5.58826	4.60854	4.41134	2.68919	2.4348	1.96583	3.63642	3.93597	3.95396
ENSMUSG00000003541_ENSMUSG00000003541_Ier3_chr17:35821683-35822923	ENSMUSG00000003541	ENSMUSG00000003541	Ier3	chr17:35821683-35822923	protein_coding	3.22559	3.18696	3.82712	5.59343	5.99378	6.21146	6.84293	4.23452	5.15896	5.36316	9.14227	11.5121
ENSMUSG00000003545_ENSMUSG00000003545_Fosb_chr7:19302720-19310045	ENSMUSG00000003545	ENSMUSG00000003545	Fosb	chr7:19302720-19310045	protein_coding	0.116957	0.178027	0.19151	0.0779812	0.105982	0.0197886	9.55618	1.86815	8.56866	2.99545	9.15368	10.2487
ENSMUSG00000003546_ENSMUSG00000003546_Klc4_chr17:46630630-46645144	ENSMUSG00000003546	ENSMUSG00000003546	Klc4	chr17:46630630-46645144	protein_coding	11.5591	12.8609	12.8129	11.2958	13.3428	13.5555	10.027	8.86183	10.892	9.43326	7.89227	7.30097
ENSMUSG00000003549_ENSMUSG00000003549_Ercc1_chr7:19344777-19356524	ENSMUSG00000003549	ENSMUSG00000003549	Ercc1	chr7:19344777-19356524	protein_coding	7.11915	6.31703	9.6127	9.16273	6.84465	8.04186	28.7012	30.0288	23.9143	39.5175	49.338	50.9023
ENSMUSG00000003555_ENSMUSG00000003555_Cyp17a1_chr19:46667164-46672974	ENSMUSG00000003555	ENSMUSG00000003555	Cyp17a1	chr19:46667164-46672974	protein_coding	0	0.043599	0	0	0	0	0	0	0	0.0411892	0	0
ENSMUSG00000003559_ENSMUSG00000003559_As3mt_chr19:46707442-46741095	ENSMUSG00000003559	ENSMUSG00000003559	As3mt	chr19:46707442-46741095	protein_coding	11.644	12.0781	12.01	9.69878	9.71405	11.2544	7.49968	6.98061	8.88811	5.70447	4.91375	5.82711
ENSMUSG00000003573_ENSMUSG00000003573_Homer3_chr8:70282826-70294361	ENSMUSG00000003573	ENSMUSG00000003573	Homer3	chr8:70282826-70294361	protein_coding	7.13936	5.86326	9.73867	10.9984	9.11543	9.10076	4.85367	5.2951	5.32893	6.92799	6.72166	7.02957
ENSMUSG00000003575_ENSMUSG00000003575_Crtc1_chr8:70382354-70439579	ENSMUSG00000003575	ENSMUSG00000003575	Crtc1	chr8:70382354-70439579	protein_coding	1.32441	1.61189	1.9697	1.66797	1.96698	1.52295	1.14357	1.58389	1.66546	1.5534	1.40701	2.03314
ENSMUSG00000003581_ENSMUSG00000003581_Rnf215_chr11:4135201-4141172	ENSMUSG00000003581	ENSMUSG00000003581	Rnf215	chr11:4135201-4141172	protein_coding	9.2321	8.10147	10.6602	8.36937	9.70663	7.93372	5.33599	8.16132	6.9391	6.54093	5.60342	5.88363
ENSMUSG00000003585_ENSMUSG00000003585_Sec14l2_chr11:4097038-4123415	ENSMUSG00000003585	ENSMUSG00000003585	Sec14l2	chr11:4097038-4123415	protein_coding	0.444544	0.136267	0.675379	0.668452	0.582915	0.313267	0.288864	0.276288	0.382747	0.627788	0.488382	0.564233
ENSMUSG00000003604_ENSMUSG00000003604_Aven_chr2:112492963-112634573	ENSMUSG00000003604	ENSMUSG00000003604	Aven	chr2:112492963-112634573	protein_coding	6.62478	8.02079	6.95717	6.31392	7.9478	9.09641	14.1016	13.5513	13.175	12.716	12.0619	12.0287
ENSMUSG00000003617_ENSMUSG00000003617_Cp_chr3:19957053-20009145	ENSMUSG00000003617	ENSMUSG00000003617	Cp	chr3:19957053-20009145	protein_coding	15.7968	14.3301	11.8753	15.7505	14.4149	13.5828	12.4212	9.74885	9.77595	11.7337	9.85066	10.8625
ENSMUSG00000003623_ENSMUSG00000003623_Crot_chr5:8966032-8997324	ENSMUSG00000003623	ENSMUSG00000003623	Crot	chr5:8966032-8997324	protein_coding	23.509	22.9499	20.2656	19.9154	20.3219	21.2672	5.94526	4.38785	6.48683	6.47849	5.94844	7.24065
ENSMUSG00000003644_ENSMUSG00000003644_Rps6ka1_chr4:133847289-133887797	ENSMUSG00000003644	ENSMUSG00000003644	Rps6ka1	chr4:133847289-133887797	protein_coding	10.214	5.25155	6.48337	5.39186	8.0534	6.3911	1.38857	2.06868	1.46552	1.78841	2.47069	1.69729
ENSMUSG00000003657_ENSMUSG00000003657_Calb2_chr8:110142538-110168206	ENSMUSG00000003657	ENSMUSG00000003657	Calb2	chr8:110142538-110168206	protein_coding	0	0	0	0	0	0	0	0	0	0	0	0
ENSMUSG00000003660_ENSMUSG00000003660_Snrnp200_chr2:127208385-127240451	ENSMUSG00000003660	ENSMUSG00000003660	Snrnp200	chr2:127208385-127240451	protein_coding	20.1834	20.0808	21.8634	21.3135	20.0701	20.3426	18.8706	18.224	17.9809	17.5697	16.9413	18.9617
ENSMUSG00000003662_ENSMUSG00000003662_Ciao1_chr2:127240937-127247816	ENSMUSG00000003662	ENSMUSG00000003662	Ciao1	chr2:127240937-127247816	protein_coding	35.5893	25.3863	38.8611	35.4268	34.7847	32.5315	35.726	35.4809	39.7406	32.1685	27.6308	27.4192
ENSMUSG00000003665_ENSMUSG00000003665_Has1_chr17:17843327-17855188	ENSMUSG00000003665	ENSMUSG00000003665	Has1	chr17:17843327-17855188	protein_coding	0	0.111693	0.119863	0.146649	0.0796953	0.0372213	0.86598	0.266486	0.876904	1.58357	0.999501	1.97312
ENSMUSG00000003680_ENSMUSG00000003680_Taf6l_chr19:8774353-8786417	ENSMUSG00000003680	ENSMUSG00000003680	Taf6l	chr19:8774353-8786417	protein_coding	4.47903	2.93123	4.09538	5.71078	4.4514	4.10547	4.8185	4.55687	4.39446	6.65287	4.63769	5.00824
ENSMUSG00000003721_ENSMUSG00000003721_Insig2_chr1:121304352-121332589	ENSMUSG00000003721	ENSMUSG00000003721	Insig2	chr1:121304352-121332589	protein_coding	17.4858	19.0732	18.8992	18.9068	21.3028	19.235	22.8397	22.6039	20.9584	18.9803	17.5399	16.2445
ENSMUSG00000003731_ENSMUSG00000003731_Kpna6_chr4:129643979-129672767	ENSMUSG00000003731	ENSMUSG00000003731	Kpna6	chr4:129643979-129672767	protein_coding	15.9824	17.533	15.9482	16.4323	16.1034	18.175	23.0891	21.895	23.415	19.7361	19.7246	19.1709
ENSMUSG00000003746_ENSMUSG00000003746_Man1a_chr10:53904787-54075796	ENSMUSG00000003746	ENSMUSG00000003746	Man1a	chr10:53904787-54075796	protein_coding	4.66683	5.07622	5.16048	6.97673	4.9343	5.07965	9.28827	8.24919	8.06476	8.52237	9.37216	10.0436
ENSMUSG00000003752_ENSMUSG00000003752_Itpkc_chr7:27207171-27228628	ENSMUSG00000003752	ENSMUSG00000003752	Itpkc	chr7:27207171-27228628	protein_coding	3.21733	2.61383	2.93387	3.24626	2.73776	3.48247	4.27972	2.5911	3.28197	4.51778	3.51157	4.47023
ENSMUSG00000003762_ENSMUSG00000003762_Adck4_chr7:27233022-27262252	ENSMUSG00000003762	ENSMUSG00000003762	Adck4	chr7:27233022-27262252	protein_coding	14.0261	11.9432	14.6402	15.2591	15.6271	14.4096	12.4537	13.0709	12.3121	20.2686	18.4376	21.244
ENSMUSG00000003778_ENSMUSG00000003778_Brd8_chr18:34598614-34624601	ENSMUSG00000003778	ENSMUSG00000003778	Brd8	chr18:34598614-34624601	protein_coding	12.3013	10.3537	9.98759	11.6678	11.7903	10.3464	7.58169	7.45827	7.65132	9.2827	9.37767	9.04109
ENSMUSG00000003779_ENSMUSG00000003779_Kif20a_chr18:34624623-34633265	ENSMUSG00000003779	ENSMUSG00000003779	Kif20a	chr18:34624623-34633265	protein_coding	0.197434	0.292184	0.235769	0.267463	0.178899	0.146144	0.260578	0.199574	0.362641	0.276519	0.261839	0.196747
ENSMUSG00000003808_ENSMUSG00000003808_Farsa_chr8:84856988-84869257	ENSMUSG00000003808	ENSMUSG00000003808	Farsa	chr8:84856988-84869257	protein_coding	11.6356	11.615	13.1133	14.8198	13.3472	12.2462	17.8658	15.3842	13.7344	20.1831	20.5441	23.3312
ENSMUSG00000003809_ENSMUSG00000003809_Gcdh_chr8:84886392-84893921	ENSMUSG00000003809	ENSMUSG00000003809	Gcdh	chr8:84886392-84893921	protein_coding	35.9911	35.7166	32.5835	42.2402	38.196	40.0502	22.7762	26.8596	25.3664	30.913	24.3888	23.8295
ENSMUSG00000003810_ENSMUSG00000003810_Mast2_chr4:116306761-116464183	ENSMUSG00000003810	ENSMUSG00000003810	Mast2	chr4:116306761-116464183	protein_coding	9.14314	7.35087	9.08275	6.59036	7.52672	6.98665	9.45615	9.69069	8.31095	8.97923	9.90054	10.3198
ENSMUSG00000003812_ENSMUSG00000003812_Dnase2a_chr8:84908559-84922915	ENSMUSG00000003812	ENSMUSG00000003812	Dnase2a	chr8:84908559-84922915	protein_coding	10.2692	8.6617	8.14178	10.1961	10.1582	11.3362	4.06812	6.78381	4.60942	4.55753	4.97169	4.31575
ENSMUSG00000003813_ENSMUSG00000003813_Rad23a_chr8:84834018-84840665	ENSMUSG00000003813	ENSMUSG00000003813	Rad23a	chr8:84834018-84840665	protein_coding	39.2653	32.6975	40.7755	36.0711	43.0052	41.0354	43.9781	45.1714	47.4255	43.3011	44.0928	41.9693
ENSMUSG00000003814_ENSMUSG00000003814_Calr_chr8:84841849-84846934	ENSMUSG00000003814	ENSMUSG00000003814	Calr	chr8:84841849-84846934	protein_coding	119.385	122.067	129.078	137.439	135.343	137.581	182.564	185.786	192.276	166.816	160.358	170.968
ENSMUSG00000003824_ENSMUSG00000003824_Syce2_chr8:84872110-84888221	ENSMUSG00000003824	ENSMUSG00000003824	Syce2	chr8:84872110-84888221	protein_coding	3.30443	2.29306	3.48638	2.18237	2.63855	2.78461	0.318766	0.863547	1.50331	1.58002	0.975845	0.446565
ENSMUSG00000003847_ENSMUSG00000003847_Nfat5_chr8:107293469-107379517	ENSMUSG00000003847	ENSMUSG00000003847	Nfat5	chr8:107293469-107379517	protein_coding	3.03971	2.72626	3.03252	3.85868	2.76221	2.76775	2.65488	2.51349	2.22327	2.95315	3.50074	3.31965
ENSMUSG00000003848_ENSMUSG00000003848_Nob1_chr8:107412485-107425051	ENSMUSG00000003848	ENSMUSG00000003848	Nob1	chr8:107412485-107425051	protein_coding	7.57733	6.18375	7.75715	7.33303	8.61177	8.75388	12.749	12.5531	11.3426	13.3086	13.4562	15.6777
ENSMUSG00000003849_ENSMUSG00000003849_Nqo1_chr8:107388224-107403206	ENSMUSG00000003849	ENSMUSG00000003849	Nqo1	chr8:107388224-107403206	protein_coding	1.29239	1.14591	1.00408	1.33259	1.22519	1.19701	0.475213	0.682266	0.902982	0.442582	0.605313	0.674413
ENSMUSG00000003863_ENSMUSG00000003863_Ppfia3_chr7:45339125-45367019	ENSMUSG00000003863	ENSMUSG00000003863	Ppfia3	chr7:45339125-45367019	protein_coding	0.290287	0	0.0989466	0.037428	0.0203469	0	0.0677184	0.0975219	0.0235686	0.0609136	0.102077	0.0223752
ENSMUSG00000003865_ENSMUSG00000003865_Gys1_chr7:45434843-45456619	ENSMUSG00000003865	ENSMUSG00000003865	Gys1	chr7:45434843-45456619	protein_coding	66.6647	66.4938	67.038	73.0554	72.941	69.1612	51.3462	50.1535	57.7027	47.4967	38.6251	38.4417
ENSMUSG00000003868_ENSMUSG00000003868_Ruvbl2_chr7:45421851-45438096	ENSMUSG00000003868	ENSMUSG00000003868	Ruvbl2	chr7:45421851-45438096	protein_coding	23.6935	24.3896	30.8139	24.626	28.5454	25.9895	22.9221	23.6134	24.848	26.4688	25.0214	27.339
ENSMUSG00000003872_ENSMUSG00000003872_Lin7b_chr7:45367890-45370583	ENSMUSG00000003872	ENSMUSG00000003872	Lin7b	chr7:45367890-45370583	protein_coding	0.923924	0.704344	0.276041	0	1.11279	0.353244	0	0.520638	0	0	0	0
ENSMUSG00000003873_ENSMUSG00000003873_Bax_chr7:45461694-45466898	ENSMUSG00000003873	ENSMUSG00000003873	Bax	chr7:45461694-45466898	protein_coding	14.8718	13.7342	19.0008	15.3846	19.2938	18.8	23.5867	20.6757	20.773	29.5779	31.6017	29.3672
ENSMUSG00000003882_ENSMUSG00000003882_Il7r_chr15:9506160-9529876	ENSMUSG00000003882	ENSMUSG00000003882	Il7r	chr15:9506160-9529876	protein_coding	0.0828645	0.163521	0.188376	0.184151	0.275283	0.116831	0.0777339	0.111657	0.0289872	0.265238	0.523105	0.330297
ENSMUSG00000003923_ENSMUSG00000003923_Tfam_chr10:71225463-71238280	ENSMUSG00000003923	ENSMUSG00000003923	Tfam	chr10:71225463-71238280	protein_coding	32.6046	36.8615	25.83	29.0846	29.5719	33.7795	29.6834	29.32	24.0145	28.0868	24.041	28.4246
ENSMUSG00000003929_ENSMUSG00000003929_Zfp81_chr17:33329341-33358878	ENSMUSG00000003929	ENSMUSG00000003929	Zfp81	chr17:33329341-33358878	protein_coding	0.592996	0.686627	0.466615	0.709253	0.677788	0.81801	0.245126	0.247826	0.257194	0.381925	0.322437	0.37258
ENSMUSG00000003934_ENSMUSG00000003934_Efnb3_chr11:69554091-69560205	ENSMUSG00000003934	ENSMUSG00000003934	Efnb3	chr11:69554091-69560205	protein_coding	0.111414	0.141338	0.170959	0.348181	0.252356	0.188498	0.0783854	0.112593	0.0876909	0.111443	0.0632991	0.0555116
ENSMUSG00000003948_ENSMUSG00000003948_Mmd_chr11:90187683-90278589	ENSMUSG00000003948	ENSMUSG00000003948	Mmd	chr11:90187683-90278589	protein_coding	88.8338	90.0386	92.689	72.015	70.0242	71.5374	99.4095	88.926	99.2773	81.9779	72.6159	79.7812
ENSMUSG00000003949_ENSMUSG00000003949_Hlf_chr11:90336535-90390895	ENSMUSG00000003949	ENSMUSG00000003949	Hlf	chr11:90336535-90390895	protein_coding	13.4742	12.2994	16.2131	15.4812	14.9641	12.5725	5.64502	4.53241	6.09672	9.1531	7.37517	7.57925
ENSMUSG00000003955_ENSMUSG00000003955_Fam162a_chr16:36043843-36071515	ENSMUSG00000003955	ENSMUSG00000003955	Fam162a	chr16:36043843-36071515	protein_coding	86.2856	89.9527	85.2822	100.057	86.924	88.8499	156.357	166.509	167.447	123.624	115.26	107.961
ENSMUSG00000003970_ENSMUSG00000003970_Rpl8_chr15:76904070-76906318	ENSMUSG00000003970	ENSMUSG00000003970	Rpl8	chr15:76904070-76906318	protein_coding	346.076	307.131	391.955	396.794	391.681	356.519	393.912	429.527	388.574	476.654	471.715	475.509
ENSMUSG00000003974_ENSMUSG00000003974_Grm3_chr5:9485235-9725352	ENSMUSG00000003974	ENSMUSG00000003974	Grm3	chr5:9485235-9725352	protein_coding	0	0	0	0	0	0	0	0	0	0	0	0
ENSMUSG00000003992_ENSMUSG00000003992_Ssbp2_chr13:91460282-91703429	ENSMUSG00000003992	ENSMUSG00000003992	Ssbp2	chr13:91460282-91703429	protein_coding	16.4004	13.9382	16.0807	15.0703	13.7373	12.242	6.85835	6.00712	3.99904	8.48689	7.36181	10.5131
ENSMUSG00000004018_ENSMUSG00000004018_Fancl_chr11:26386134-26471876	ENSMUSG00000004018	ENSMUSG00000004018	Fancl	chr11:26386134-26471876	protein_coding	2.34081	2.39765	1.8387	2.29427	3.603	2.79609	0.695591	1.72327	0.692155	1.90736	1.67095	2.4358
ENSMUSG00000004031_ENSMUSG00000004031_Fam5b_chr1:158245270-158356260	ENSMUSG00000004031	ENSMUSG00000004031	Fam5b	chr1:158245270-158356260	protein_coding	0.085203	0.0720479	0.0436071	0	0	0.0180203	0.0299855	0.0215376	0	0	0	0
ENSMUSG00000004032_ENSMUSG00000004032_Gstm5_chr3:107895820-107898686	ENSMUSG00000004032	ENSMUSG00000004032	Gstm5	chr3:107895820-107898686	protein_coding	36.3397	41.3676	40.042	34.1231	35.8852	39.1441	32.1721	33.4656	28.3812	27.5234	27.2432	26.2691
ENSMUSG00000004035_ENSMUSG00000004035_Gstm7_chr3:107926333-107931817	ENSMUSG00000004035	ENSMUSG00000004035	Gstm7	chr3:107926333-107931817	protein_coding	5.67876	4.68951	5.5625	6.69599	6.62529	7.92053	2.68167	1.99607	1.65606	4.90395	5.09893	2.71071
ENSMUSG00000004038_ENSMUSG00000004038_Gstm3_chr3:107942332-107969283	ENSMUSG00000004038	ENSMUSG00000004038	Gstm3	chr3:107942332-107969283	protein_coding	0.735078	0.540227	0.3105	0.508015	0.551789	0.340059	0.25277	0.306974	0.334029	0.2768	0.220188	0.138145
ENSMUSG00000004040_ENSMUSG00000004040_Stat3_chr11:100885097-100939540	ENSMUSG00000004040	ENSMUSG00000004040	Stat3	chr11:100885097-100939540	protein_coding	23.1477	23.5176	24.4506	22.7163	23.6336	26.2516	32.8103	28.7119	28.0488	47.226	62.5695	68.796
ENSMUSG00000004043_ENSMUSG00000004043_Stat5a_chr11:100859350-100885169	ENSMUSG00000004043	ENSMUSG00000004043	Stat5a	chr11:100859350-100885169	protein_coding	26.1381	26.2632	30.0931	30.7609	30.3868	28.9343	13.2461	9.83295	9.13294	10.0977	11.2368	15.098
ENSMUSG00000004044_ENSMUSG00000004044_Ptrf_chr11:100956732-100970887	ENSMUSG00000004044	ENSMUSG00000004044	Ptrf	chr11:100956732-100970887	protein_coding	147.275	153.249	164.598	173.791	181.398	156.289	137.655	116.515	131.969	162.116	179.678	182.236
ENSMUSG00000004054_ENSMUSG00000004054_Map3k11_chr19:5689130-5702862	ENSMUSG00000004054	ENSMUSG00000004054	Map3k11	chr19:5689130-5702862	protein_coding	11.3485	10.416	14.8564	12.2267	13.858	10.7324	10.99	10.8901	10.8707	11.6123	10.8003	11.0104
ENSMUSG00000004056_ENSMUSG00000004056_Akt2_chr7:27591551-27640826	ENSMUSG00000004056	ENSMUSG00000004056	Akt2	chr7:27591551-27640826	protein_coding	224.969	216.155	228.943	227.007	240.651	226.571	126.517	114.233	133.313	136.896	121.585	123.645
ENSMUSG00000004069_ENSMUSG00000004069_Dnaja3_chr16:4639988-4707695	ENSMUSG00000004069	ENSMUSG00000004069	Dnaja3	chr16:4639988-4707695	protein_coding	98.8702	94.5914	93.1733	91.9741	92.9932	94.7353	110.758	107.051	106.598	103.097	95.6965	97.1595
ENSMUSG00000004070_ENSMUSG00000004070_Hmox2_chr16:4726360-4766742	ENSMUSG00000004070	ENSMUSG00000004070	Hmox2	chr16:4726360-4766742	protein_coding	40.2493	34.3552	38.7189	39.526	42.1266	39.2774	40.3092	49.7797	44.1088	30.3867	27.4332	27.784
ENSMUSG00000004071_ENSMUSG00000004071_Cdip1_chr16:4750347-4790292	ENSMUSG00000004071	ENSMUSG00000004071	Cdip1	chr16:4750347-4790292	protein_coding	66.3377	54.6038	74.2026	77.0251	68.978	66.816	51.6309	47.4296	48.5191	62.8991	50.8577	54.1349
ENSMUSG00000004085_ENSMUSG00000004085_B230120H23Rik_chr2:72285636-72442610	ENSMUSG00000004085	ENSMUSG00000004085	B230120H23Rik	chr2:72285636-72442610	protein_coding	10.1798	9.15294	9.83008	9.41846	9.26977	8.99356	5.13945	4.39624	4.69422	6.84734	4.82189	5.46106
ENSMUSG00000004096_ENSMUSG00000004096_Cwc15_chr9:14500616-14510577	ENSMUSG00000004096	ENSMUSG00000004096	Cwc15	chr9:14500616-14510577	protein_coding	48.9029	49.5602	46.9309	45.2765	44.8667	48.8526	65.8252	65.7388	63.9408	52.9112	52.462	51.8989
ENSMUSG00000004098_ENSMUSG00000004098_Col5a3_chr9:20770049-20815067	ENSMUSG00000004098	ENSMUSG00000004098	Col5a3	chr9:20770049-20815067	protein_coding	10.6654	13.5504	14.9371	14.3643	15.9821	15.0808	14.9815	12.1991	14.7114	14.9104	16.6184	13.9036
ENSMUSG00000004099_ENSMUSG00000004099_Dnmt1_chr9:20907205-20959888	ENSMUSG00000004099	ENSMUSG00000004099	Dnmt1	chr9:20907205-20959888	protein_coding	4.55013	4.218	5.0457	4.79059	5.21585	4.66196	2.12721	2.23695	1.50061	3.10863	3.42244	3.15818
ENSMUSG00000004100_ENSMUSG00000004100_Ppan_chr9:20888174-20892178	ENSMUSG00000004100	ENSMUSG00000004100	Ppan	chr9:20888174-20892178	protein_coding	5.53664	4.86379	7.87086	7.57126	5.2135	6.66221	17.2272	16.753	16.2495	19.5024	18.7099	25.3698
ENSMUSG00000004105_ENSMUSG00000004105_Angptl2_chr2:33216068-33247717	ENSMUSG00000004105	ENSMUSG00000004105	Angptl2	chr2:33216068-33247717	protein_coding	66.3496	60.8204	79.4887	87.4424	73.8252	74.6785	23.8027	18.3823	22.6668	26.7207	26.4605	29.8326
ENSMUSG00000004110_ENSMUSG00000004110_Cacna1e_chr1:154392518-154725920	ENSMUSG00000004110	ENSMUSG00000004110	Cacna1e	chr1:154392518-154725920	protein_coding	0.00663944	0.00561252	0.00907422	0.0110708	0.00602008	0	0.00935566	0	0.00697352	0	0.00503348	0
ENSMUSG00000004113_ENSMUSG00000004113_Cacna1b_chr2:24603886-24763152	ENSMUSG00000004113	ENSMUSG00000004113	Cacna1b	chr2:24603886-24763152	protein_coding	0.0244609	0	0.178763	0	0.03182	0.022269	0.00861027	0.00887089	0.271397	0.00701974	0.00664394	0.0174836
ENSMUSG00000004127_ENSMUSG00000004127_Trmt10a_chr3:138143447-138159821	ENSMUSG00000004127	ENSMUSG00000004127	Trmt10a	chr3:138143447-138159821	protein_coding	8.28272	9.13813	7.97279	6.13519	8.05707	5.58376	6.73958	6.14396	6.86504	5.47382	4.65875	6.22038
ENSMUSG00000004151_ENSMUSG00000004151_Etv1_chr12:38779379-38868215	ENSMUSG00000004151	ENSMUSG00000004151	Etv1	chr12:38779379-38868215	protein_coding	1.2148	0.82498	0.656495	1.19663	0.934404	0.270489	0.286766	0.33355	0.233734	0.211347	0.328021	0.161895
ENSMUSG00000004187_ENSMUSG00000004187_Kifc2_chr15:76660640-76668196	ENSMUSG00000004187	ENSMUSG00000004187	Kifc2	chr15:76660640-76668196	protein_coding	3.83964	3.84424	4.21648	3.74095	4.19494	4.53777	1.56915	1.398	1.51102	1.80733	1.4543	1.57548
ENSMUSG00000004207_ENSMUSG00000004207_Psap_chr10:60277626-60302597	ENSMUSG00000004207	ENSMUSG00000004207	Psap	chr10:60277626-60302597	protein_coding	732.012	677.629	810.748	834.208	822.869	785.59	561.82	565.118	576.12	697.44	664.765	641.787
ENSMUSG00000004221_ENSMUSG00000004221_Ikbkg_chrX:74393289-74453854	ENSMUSG00000004221	ENSMUSG00000004221	Ikbkg	chrX:74393289-74453854	protein_coding	12.7525	10.5458	12.4527	11.4443	14.3661	11.0102	17.8638	12.3045	13.7471	14.0156	13.344	17.9973
ENSMUSG00000004231_ENSMUSG00000004231_Pax2_chr19:44756048-44838268	ENSMUSG00000004231	ENSMUSG00000004231	Pax2	chr19:44756048-44838268	protein_coding	0	0	0	0	0	0	0	0	0	0	0	0
ENSMUSG00000004233_ENSMUSG00000004233_Wars2_chr3:99141067-99239186	ENSMUSG00000004233	ENSMUSG00000004233	Wars2	chr3:99141067-99239186	protein_coding	2.67205	3.35176	2.49536	2.72547	2.98582	1.78786	2.33808	2.75747	2.08836	3.39979	3.01672	3.0108
ENSMUSG00000004263_ENSMUSG00000004263_Atn1_chr6:124739188-124756524	ENSMUSG00000004263	ENSMUSG00000004263	Atn1	chr6:124739188-124756524	protein_coding	12.0271	10.795	15.466	13.1941	17.5222	13.1956	15.1735	13.7877	15.8797	14.0538	15.7291	15.761
ENSMUSG00000004264_ENSMUSG00000004264_Phb2_chr6:124712335-124716950	ENSMUSG00000004264	ENSMUSG00000004264	Phb2	chr6:124712335-124716950	protein_coding	176.911	162.062	182.437	171.79	175.568	179.44	181.726	174.597	189.49	161.838	148.561	159.727
ENSMUSG00000004266_ENSMUSG00000004266_Ptpn6_chr6:124720706-124738714	ENSMUSG00000004266	ENSMUSG00000004266	Ptpn6	chr6:124720706-124738714	protein_coding	3.37076	1.49886	2.07188	1.98459	6.25391	2.08841	2.25659	3.35783	1.32953	2.36078	4.37258	6.90064
ENSMUSG00000004267_ENSMUSG00000004267_Eno2_chr6:124760052-124769673	ENSMUSG00000004267	ENSMUSG00000004267	Eno2	chr6:124760052-124769673	protein_coding	1.19663	0.660935	0.88152	1.30107	0.972896	0.979252	1.73333	0.971913	1.49539	1.87556	2.13785	2.86178
ENSMUSG00000004268_ENSMUSG00000004268_Emg1_chr6:124704380-124712178	ENSMUSG00000004268	ENSMUSG00000004268	Emg1	chr6:124704380-124712178	protein_coding	34.6476	32.1223	30.3882	31.5977	33.7894	28.3642	41.1357	44.6727	40.1889	40.4008	36.7464	37.4159
ENSMUSG00000004270_ENSMUSG00000004270_Lpcat3_chr6:124663026-124704418	ENSMUSG00000004270	ENSMUSG00000004270	Lpcat3	chr6:124663026-124704418	protein_coding	22.7483	27.5703	30.9623	27.283	32.4067	26.8845	30.0122	31.5084	31.3634	22.8141	20.3527	21.8914
ENSMUSG00000004285_ENSMUSG00000004285_Atp6v1f_chr6:29467717-29470512	ENSMUSG00000004285	ENSMUSG00000004285	Atp6v1f	chr6:29467717-29470512	protein_coding	92.6229	80.582	95.7144	99.8341	96.4016	92.6573	97.336	108.623	105.142	102.514	92.44	93.0557
ENSMUSG00000004296_ENSMUSG00000004296_Il12b_chr11:44400062-44414033	ENSMUSG00000004296	ENSMUSG00000004296	Il12b	chr11:44400062-44414033	protein_coding	0	0.0423776	0	0	0	0	0	0	0	0	0	0
ENSMUSG00000004317_ENSMUSG00000004317_Clcn5_chrX:7153809-7319358	ENSMUSG00000004317	ENSMUSG00000004317	Clcn5	chrX:7153809-7319358	protein_coding	1.16018	0.697762	0.946383	0.819426	0.615519	1.24972	1.9346	2.20391	2.9763	1.82082	2.06384	2.61648
ENSMUSG00000004319_ENSMUSG00000004319_Clcn3_chr8:60910388-60983300	ENSMUSG00000004319	ENSMUSG00000004319	Clcn3	chr8:60910388-60983300	protein_coding	7.81903	7.86765	7.20398	6.90634	7.23884	7.2405	9.28111	8.77878	8.52995	5.96412	5.75182	5.90775
ENSMUSG00000004328_ENSMUSG00000004328_Hif3a_chr7:17031506-17062427	ENSMUSG00000004328	ENSMUSG00000004328	Hif3a	chr7:17031506-17062427	protein_coding	0.107074	0.0452632	0.0365636	0.0781119	0.121327	0.034905	0.146851	0.0839004	0.0702698	0.192904	0.263753	0.120051
ENSMUSG00000004341_ENSMUSG00000004341_Gpx6_chr13:21312216-21319624	ENSMUSG00000004341	ENSMUSG00000004341	Gpx6	chr13:21312216-21319624	protein_coding	0	0	0	0	0	0	0	0	0	0	0	0
ENSMUSG00000004344_ENSMUSG00000004344_Gpx5_chr13:21286428-21292731	ENSMUSG00000004344	ENSMUSG00000004344	Gpx5	chr13:21286428-21292731	protein_coding	0	0	0	0	0	0	0	0	0	0	0	0
ENSMUSG00000004347_ENSMUSG00000004347_Pde1c_chr6:56069820-56369634	ENSMUSG00000004347	ENSMUSG00000004347	Pde1c	chr6:56069820-56369634	protein_coding	0.0532718	0.0190312	0.0210147	0.065611	0.00929542	0.0190413	0.247734	0.243304	0.301475	0.156031	0.139919	0.166881
ENSMUSG00000004356_ENSMUSG00000004356_Utp20_chr10:88746606-88826814	ENSMUSG00000004356	ENSMUSG00000004356	Utp20	chr10:88746606-88826814	protein_coding	1.41344	1.45502	1.31375	1.57913	1.42964	1.26912	3.19012	2.96807	2.71632	3.3958	3.76825	4.11108
ENSMUSG00000004359_ENSMUSG00000004359_Spic_chr10:88674771-88685015	ENSMUSG00000004359	ENSMUSG00000004359	Spic	chr10:88674771-88685015	protein_coding	0.559997	0.114006	0.215549	0.170012	0.181076	0.399338	0.262388	0.290323	0.421472	0.173339	0.209757	0.551965
ENSMUSG00000004360_ENSMUSG00000004360_9330159F19Rik_chr10:29211642-29230779	ENSMUSG00000004360	ENSMUSG00000004360	9330159F19Rik	chr10:29211642-29230779	protein_coding	0.228745	0.283656	0.187424	0.419486	0.276455	0.258038	0.257712	0.401098	0.368265	0.195353	0.138689	0.167176
ENSMUSG00000004364_ENSMUSG00000004364_Cul3_chr1:80264922-80340480	ENSMUSG00000004364	ENSMUSG00000004364	Cul3	chr1:80264922-80340480	protein_coding	38.3401	37.3228	39.532	36.8571	39.4061	35.4537	54.1909	53.5314	60.6708	48.7802	52.1493	50.5093
ENSMUSG00000004366_ENSMUSG00000004366_Sst_chr16:23889580-23890844	ENSMUSG00000004366	ENSMUSG00000004366	Sst	chr16:23889580-23890844	protein_coding	0	0	0	0	0	0	0	0	0	0	0	0
ENSMUSG00000004371_ENSMUSG00000004371_Il11_chr7:4773054-4782857	ENSMUSG00000004371	ENSMUSG00000004371	Il11	chr7:4773054-4782857	protein_coding	0.105698	0.357647	0	0.0879503	0.0954943	0.0893451	0.221942	0.212294	0.221166	0.187156	0.240108	0.210526
ENSMUSG00000004383_ENSMUSG00000004383_Large_chr8:72814598-73353540	ENSMUSG00000004383	ENSMUSG00000004383	Large	chr8:72814598-73353540	protein_coding	5.9173	4.56444	5.58928	5.35047	5.45363	5.09344	2.92252	2.24294	2.87636	3.37432	3.65428	4.10318
ENSMUSG00000004393_ENSMUSG00000004393_Ddx56_chr11:6258918-6267772	ENSMUSG00000004393	ENSMUSG00000004393	Ddx56	chr11:6258918-6267772	protein_coding	14.3197	11.7337	12.9006	13.8264	14.3555	13.5156	11.89	12.4289	10.5261	15.7978	16.9491	16.9115
ENSMUSG00000004394_ENSMUSG00000004394_Tmed4_chr11:6270368-6274870	ENSMUSG00000004394	ENSMUSG00000004394	Tmed4	chr11:6270368-6274870	protein_coding	39.2052	31.2255	40.2139	39.3935	39.4998	38.655	34.7291	35.2784	35.0704	35.14	30.2865	28.5094
ENSMUSG00000004415_ENSMUSG00000004415_Col26a1_chr5:136741758-136883209	ENSMUSG00000004415	ENSMUSG00000004415	Col26a1	chr5:136741758-136883209	protein_coding	0.334062	0.189013	0	0.369499	0.200206	0.37578	0.0515203	0.0332489	0.347633	0.826694	0.590305	0.221411
ENSMUSG00000004446_ENSMUSG00000004446_Bid_chr6:120891929-120916853	ENSMUSG00000004446	ENSMUSG00000004446	Bid	chr6:120891929-120916853	protein_coding	3.86604	3.46498	4.68004	5.21275	5.09195	4.50832	4.83723	4.4724	5.5912	4.26324	5.36169	5.10751
ENSMUSG00000004451_ENSMUSG00000004451_Ralb_chr1:119470304-119504794	ENSMUSG00000004451	ENSMUSG00000004451	Ralb	chr1:119470304-119504794	protein_coding	14.3708	13.4269	17.3556	16.0319	14.2975	16.1726	15.5298	15.6651	12.5967	17.873	18.4416	21.7499
ENSMUSG00000004455_ENSMUSG00000004455_Ppp1cc_chr5:122158277-122175273	ENSMUSG00000004455	ENSMUSG00000004455	Ppp1cc	chr5:122158277-122175273	protein_coding	33.431	33.8685	31.65	35.2305	36.5544	30.8444	43.5611	46.249	42.0604	46.7757	51.473	48.2499
ENSMUSG00000004460_ENSMUSG00000004460_Dnajb11_chr16:22857844-22879634	ENSMUSG00000004460	ENSMUSG00000004460	Dnajb11	chr16:22857844-22879634	protein_coding	16.3165	18.7424	16.0743	16.9075	18.1132	17.2128	21.6661	23.1657	26.2093	24.3865	22.1693	19.6831
ENSMUSG00000004462_ENSMUSG00000004462_Tbccd1_chr16:22813214-22857569	ENSMUSG00000004462	ENSMUSG00000004462	Tbccd1	chr16:22813214-22857569	protein_coding	5.2487	4.43948	4.27961	4.31826	4.21282	4.69274	2.33634	2.44962	2.40495	2.41846	2.99401	2.78055
ENSMUSG00000004473_ENSMUSG00000004473_Clec11a_chr7:44303769-44306959	ENSMUSG00000004473	ENSMUSG00000004473	Clec11a	chr7:44303769-44306959	protein_coding	1.85187	1.92844	1.58381	2.17559	1.97756	1.72691	0.900819	1.19775	0.796679	1.10099	0.898611	1.18275
ENSMUSG00000004500_ENSMUSG00000004500_Zfp324_chr7:12965837-12974236	ENSMUSG00000004500	ENSMUSG00000004500	Zfp324	chr7:12965837-12974236	protein_coding	1.65421	1.91278	1.99152	2.51877	1.97006	2.38229	0.74363	0.449632	0.551494	0.81107	0.972238	0.890987
ENSMUSG00000004508_ENSMUSG00000004508_Gab2_chr7:97081750-97308940	ENSMUSG00000004508	ENSMUSG00000004508	Gab2	chr7:97081750-97308940	protein_coding	2.57764	2.33672	2.48378	3.07978	2.85576	2.76237	4.66896	4.73746	5.56338	3.79519	4.34134	3.73916
ENSMUSG00000004530_ENSMUSG00000004530_Coro1c_chr5:113842435-113908758	ENSMUSG00000004530	ENSMUSG00000004530	Coro1c	chr5:113842435-113908758	protein_coding	6.97541	7.21664	7.98422	9.23615	9.07821	10.9949	10.0967	8.40598	8.58121	12.059	13.199	12.0593
ENSMUSG00000004535_ENSMUSG00000004535_Tax1bp1_chr6:52713728-52766780	ENSMUSG00000004535	ENSMUSG00000004535	Tax1bp1	chr6:52713728-52766780	protein_coding	34.4884	31.8169	30.4933	33.5428	32.5803	31.5375	51.5504	48.9584	49.3481	40.753	43.7852	48.0941
ENSMUSG00000004540_ENSMUSG00000004540_Psg17_chr7:18813936-18821607	ENSMUSG00000004540	ENSMUSG00000004540	Psg17	chr7:18813936-18821607	protein_coding	0	0	0	0	0	0	0	0	0	0	0	0
ENSMUSG00000004542_ENSMUSG00000004542_Psg19_chr7:18789566-18798520	ENSMUSG00000004542	ENSMUSG00000004542	Psg19	chr7:18789566-18798520	protein_coding	0	0	0	0	0	0	0	0	0	0	0	0
ENSMUSG00000004552_ENSMUSG00000004552_Ctse_chr1:131638305-131675503	ENSMUSG00000004552	ENSMUSG00000004552	Ctse	chr1:131638305-131675503	protein_coding	0.648408	0.402278	0.630984	0.478972	0.391428	0.804363	0.286949	0.218151	0.213176	0.423045	0.360002	0.502394
ENSMUSG00000004558_ENSMUSG00000004558_Ndrg2_chr14:51905270-51913488	ENSMUSG00000004558	ENSMUSG00000004558	Ndrg2	chr14:51905270-51913488	protein_coding	177.256	150.971	189.401	221.322	194.299	185.771	118.88	129.747	126.938	147.976	137.645	132.363
ENSMUSG00000004561_ENSMUSG00000004561_Mettl17_chr14:51884841-51893039	ENSMUSG00000004561	ENSMUSG00000004561	Mettl17	chr14:51884841-51893039	protein_coding	10.5068	17.5047	28.1159	36.3788	13.9026	14.0661	14.7076	17.6747	5.93895	7.70748	12.9608	11.2617
ENSMUSG00000004562_ENSMUSG00000004562_Arhgef40_chr14:51984718-52006251	ENSMUSG00000004562	ENSMUSG00000004562	Arhgef40	chr14:51984718-52006251	protein_coding	24.6165	23.0077	23.2933	29.2473	27.9853	24.9287	10.1378	11.6898	11.8647	12.5605	13.0382	10.1724
ENSMUSG00000004565_ENSMUSG00000004565_Pnpla6_chr8:3515383-3544266	ENSMUSG00000004565	ENSMUSG00000004565	Pnpla6	chr8:3515383-3544266	protein_coding	6.2873	5.75279	6.98953	6.23245	6.99731	6.05413	3.77168	3.45858	3.54143	4.14193	3.53467	3.49344
ENSMUSG00000004567_ENSMUSG00000004567_Mcoln1_chr8:3500456-3515232	ENSMUSG00000004567	ENSMUSG00000004567	Mcoln1	chr8:3500456-3515232	protein_coding	18.9143	16.7413	21.0371	21.2545	23.6973	22.0486	14.7735	11.3707	16.9299	16.2126	14.1373	15.0736
ENSMUSG00000004568_ENSMUSG00000004568_Arhgef18_chr8:3393005-3456601	ENSMUSG00000004568	ENSMUSG00000004568	Arhgef18	chr8:3393005-3456601	protein_coding	7.06424	6.414	8.51477	9.48004	8.46309	8.07999	7.07893	6.50551	6.18782	8.93282	9.95714	8.58989
ENSMUSG00000004591_ENSMUSG00000004591_Pkn2_chr3:142790901-142882004	ENSMUSG00000004591	ENSMUSG00000004591	Pkn2	chr3:142790901-142882004	protein_coding	10.6563	10.1298	9.13236	11.8319	11.1491	10.6879	16.706	15.2922	15.0426	16.0379	13.527	16.9586
ENSMUSG00000004609_ENSMUSG00000004609_Cd33_chr7:43527455-43533171	ENSMUSG00000004609	ENSMUSG00000004609	Cd33	chr7:43527455-43533171	protein_coding	0.581343	0.6349	0.659958	0.75686	0.921452	0.706875	0.664258	0.293545	0.266811	0.610348	1.87105	2.06364
ENSMUSG00000004610_ENSMUSG00000004610_Etfb_chr7:43444107-43457800	ENSMUSG00000004610	ENSMUSG00000004610	Etfb	chr7:43444107-43457800	protein_coding	1543.56	1311.39	1594.75	1614.73	1555.16	1482.17	990.038	981.611	957.259	1376.36	1175.62	1172.21
ENSMUSG00000004612_ENSMUSG00000004612_Nkg7_chr7:43437072-43438246	ENSMUSG00000004612	ENSMUSG00000004612	Nkg7	chr7:43437072-43438246	protein_coding	0.616503	0.208996	0.499988	0.307688	0.556632	0.937856	0.258596	0	0	0.393054	0	0.368322
ENSMUSG00000004613_ENSMUSG00000004613_Lim2_chr7:43430087-43435991	ENSMUSG00000004613	ENSMUSG00000004613	Lim2	chr7:43430087-43435991	protein_coding	0	0	0	0	0	0	0	0	0	0	0	0.122592
ENSMUSG00000004626_ENSMUSG00000004626_Stxbp2_chr8:3630954-3643644	ENSMUSG00000004626	ENSMUSG00000004626	Stxbp2	chr8:3630954-3643644	protein_coding	47.5984	42.0115	48.2596	42.4598	49.166	54.1405	21.7606	23.7639	25.3416	25.3066	24.8878	23.5093
ENSMUSG00000004630_ENSMUSG00000004630_Pcp2_chr8:3623370-3625545	ENSMUSG00000004630	ENSMUSG00000004630	Pcp2	chr8:3623370-3625545	protein_coding	1.77543	1.4135	1.5431	1.55745	1.20838	0.960223	0.937453	0.943579	1.60977	0.800424	0.627307	0.465786
ENSMUSG00000004631_ENSMUSG00000004631_Sgce_chr6:4674349-4747204	ENSMUSG00000004631	ENSMUSG00000004631	Sgce	chr6:4674349-4747204	protein_coding	10.0294	8.93986	10.5931	12.2138	11.92	8.92781	7.36916	6.19351	7.04405	8.1386	6.88555	7.63234
ENSMUSG00000004633_ENSMUSG00000004633_Chn2_chr6:54039553-54301810	ENSMUSG00000004633	ENSMUSG00000004633	Chn2	chr6:54039553-54301810	protein_coding	0.586032	1.17574	0.542759	0.748559	0.599653	0.933034	0.866279	1.35759	1.03062	2.12202	1.76423	1.07969
ENSMUSG00000004637_ENSMUSG00000004637_Wwox_chr8:114439654-115352708	ENSMUSG00000004637	ENSMUSG00000004637	Wwox	chr8:114439654-115352708	protein_coding	7.38279	6.42221	7.87486	6.84637	7.42566	6.95418	4.05544	4.31988	4.27465	4.82465	4.29354	3.94522
ENSMUSG00000004642_ENSMUSG00000004642_Slbp_chr5:33634951-33652574	ENSMUSG00000004642	ENSMUSG00000004642	Slbp	chr5:33634951-33652574	protein_coding	17.4647	18.5176	20.4313	18.6175	16.6365	17.1833	18.7333	15.7031	19.4575	16.48	15.9066	18.1533
ENSMUSG00000004651_ENSMUSG00000004651_Tyr_chr7:87427404-87493411	ENSMUSG00000004651	ENSMUSG00000004651	Tyr	chr7:87427404-87493411	protein_coding	0.0267399	0	0	0.0222846	0	0	0	0	0	0	0	0.0266464
ENSMUSG00000004654_ENSMUSG00000004654_Ghrhr_chr6:55376294-55388530	ENSMUSG00000004654	ENSMUSG00000004654	Ghrhr	chr6:55376294-55388530	protein_coding	0	0	0	0	0	0	0	0	0	0	0	0
ENSMUSG00000004655_ENSMUSG00000004655_Aqp1_chr6:55336431-55348555	ENSMUSG00000004655	ENSMUSG00000004655	Aqp1	chr6:55336431-55348555	protein_coding	136.035	146.235	184.732	154.761	159.672	139.984	95.3296	80.2209	97.3766	195.241	193.965	215.885
ENSMUSG00000004661_ENSMUSG00000004661_Arid3b_chr9:57790352-57836793	ENSMUSG00000004661	ENSMUSG00000004661	Arid3b	chr9:57790352-57836793	protein_coding	0.787751	1.60306	1.03301	0.887285	1.18012	1.44093	1.04059	0.740609	0.857116	0.932444	1.08858	1.19279
ENSMUSG00000004665_ENSMUSG00000004665_Cnn2_chr10:79988583-79996062	ENSMUSG00000004665	ENSMUSG00000004665	Cnn2	chr10:79988583-79996062	protein_coding	5.65037	4.48087	4.44215	5.14639	5.59736	4.6679	7.75728	7.38679	6.08491	10.1696	9.34069	10.2836
ENSMUSG00000004667_ENSMUSG00000004667_Polr2e_chr10:80035948-80039795	ENSMUSG00000004667	ENSMUSG00000004667	Polr2e	chr10:80035948-80039795	protein_coding	57.5998	53.5797	69.1397	58.2397	58.2238	59.6369	38.6837	35.681	36.2601	35.6146	36.5528	33.8651
ENSMUSG00000004668_ENSMUSG00000004668_Abca13_chr11:9191941-9684259	ENSMUSG00000004668	ENSMUSG00000004668	Abca13	chr11:9191941-9684259	protein_coding	0	0	0	0	0	0	0.00369736	0	0	0	0	0
ENSMUSG00000004677_ENSMUSG00000004677_Myo9b_chr8:71272713-71360712	ENSMUSG00000004677	ENSMUSG00000004677	Myo9b	chr8:71272713-71360712	protein_coding	5.28484	5.0477	5.91897	5.98066	6.20999	5.57606	4.91075	4.4557	4.73036	4.90012	5.95686	5.94796
ENSMUSG00000004698_ENSMUSG00000004698_Hdac9_chr12:34371502-34528889	ENSMUSG00000004698	ENSMUSG00000004698	Hdac9	chr12:34371502-34528889	protein_coding	0.472058	0.316001	0.523549	0.606585	0.588251	0.416005	0.193841	0.159124	0.144537	0.173194	0.193757	0.117609
ENSMUSG00000004707_ENSMUSG00000004707_Ly9_chr1:171588623-171607410	ENSMUSG00000004707	ENSMUSG00000004707	Ly9	chr1:171588623-171607410	protein_coding	0.701129	0.461015	0.656471	0.308812	0.832995	0.246309	0.7457	0.972296	0.611013	0.612405	0.67888	0.911916
ENSMUSG00000004709_ENSMUSG00000004709_Cd244_chr1:171559192-171585318	ENSMUSG00000004709	ENSMUSG00000004709	Cd244	chr1:171559192-171585318	protein_coding	0	0.0394613	0.0318377	0.0777838	0	0.118431	0.0492611	0.141526	0.0489799	0.168068	0.212132	0.279015
ENSMUSG00000004730_ENSMUSG00000004730_Emr1_chr17:57358685-57483529	ENSMUSG00000004730	ENSMUSG00000004730	Emr1	chr17:57358685-57483529	protein_coding	2.63041	2.33063	2.36366	3.50289	2.5463	3.13913	1.9538	1.88945	2.4626	2.5983	2.64574	2.4471
ENSMUSG00000004748_ENSMUSG00000004748_Mtfp1_chr11:4091479-4095445	ENSMUSG00000004748	ENSMUSG00000004748	Mtfp1	chr11:4091479-4095445	protein_coding	32.6564	35.0848	36.6408	32.1724	36.5413	33.6341	40.6987	40.7314	41.6856	31.5487	31.249	28.0541
ENSMUSG00000004768_ENSMUSG00000004768_Rab23_chr1:33719881-33742564	ENSMUSG00000004768	ENSMUSG00000004768	Rab23	chr1:33719881-33742564	protein_coding	4.05581	2.68224	2.97196	4.00682	2.96996	2.98213	3.05784	2.59334	3.33958	3.89113	3.2118	4.48507
ENSMUSG00000004771_ENSMUSG00000004771_Rab11a_chr9:64715298-64737758	ENSMUSG00000004771	ENSMUSG00000004771	Rab11a	chr9:64715298-64737758	protein_coding	62.9918	59.5967	59.9353	65.9335	73.6998	68.8854	87.8056	79.0306	79.3407	84.74	100.309	96.0202
ENSMUSG00000004788_ENSMUSG00000004788_Eif2b2_chr12:85219480-85226628	ENSMUSG00000004788	ENSMUSG00000004788	Eif2b2	chr12:85219480-85226628	protein_coding	17.2761	14.9326	20.2897	21.1763	18.6871	13.8475	24.0296	24.8928	32.5488	28.0653	20.5898	29.3206
ENSMUSG00000004789_ENSMUSG00000004789_Dlst_chr12:85110832-85134091	ENSMUSG00000004789	ENSMUSG00000004789	Dlst	chr12:85110832-85134091	protein_coding	442.848	433.223	452.482	417.139	418.143	433.215	364.474	366.092	376.382	383.132	345.124	355.818
ENSMUSG00000004791_ENSMUSG00000004791_Pgf_chr12:85166638-85177296	ENSMUSG00000004791	ENSMUSG00000004791	Pgf	chr12:85166638-85177296	protein_coding	0.903692	1.07075	1.14689	0.752628	0.817797	0.56043	4.1026	2.24679	2.71516	10.2062	14.4045	18.4259
ENSMUSG00000004798_ENSMUSG00000004798_Ulk2_chr11:61775648-61855073	ENSMUSG00000004798	ENSMUSG00000004798	Ulk2	chr11:61775648-61855073	protein_coding	12.0285	10.9648	12.181	14.4951	13.1223	12.8972	10.0288	8.9095	9.26939	11.2646	10.9085	10.7662
ENSMUSG00000004814_ENSMUSG00000004814_Ccl24_chr5:135569936-135573043	ENSMUSG00000004814	ENSMUSG00000004814	Ccl24	chr5:135569936-135573043	protein_coding	5.12789	3.69347	4.77985	8.72984	5.88371	5.43592	4.13277	2.46531	3.68756	5.50051	3.29884	4.80297
ENSMUSG00000004815_ENSMUSG00000004815_Dgkq_chr5:108646692-108669672	ENSMUSG00000004815	ENSMUSG00000004815	Dgkq	chr5:108646692-108669672	protein_coding	7.81292	5.12171	6.39292	6.79929	7.65891	7.08022	9.73366	6.7949	6.25669	8.57738	5.89631	7.50998
ENSMUSG00000004821_ENSMUSG00000004821_Tmed11_chr5:108777234-108795363	ENSMUSG00000004821	ENSMUSG00000004821	Tmed11	chr5:108777234-108795363	protein_coding	0	0	0	0	0	0	0	0	0	0	0	0
ENSMUSG00000004837_ENSMUSG00000004837_Grap_chr11:61653264-61672784	ENSMUSG00000004837	ENSMUSG00000004837	Grap	chr11:61653264-61672784	protein_coding	4.83968	4.77024	4.84035	3.41443	4.74092	3.65953	1.95906	2.23877	1.61145	2.86681	2.36971	1.81519
ENSMUSG00000004842_ENSMUSG00000004842_Pou1f1_chr16:65520511-65535005	ENSMUSG00000004842	ENSMUSG00000004842	Pou1f1	chr16:65520511-65535005	protein_coding	0.137771	0.116638	0.110542	0.187704	0.0679677	0.169443	0.307442	0.226959	0.209907	0.24005	0.246255	0.0748552
ENSMUSG00000004843_ENSMUSG00000004843_Chmp2b_chr16:65539132-65562697	ENSMUSG00000004843	ENSMUSG00000004843	Chmp2b	chr16:65539132-65562697	protein_coding	20.3706	21.8789	20.9831	22.4695	19.1305	20.064	16.4153	17.6271	16.1917	17.9497	17.3792	19.1314
ENSMUSG00000004846_ENSMUSG00000004846_Plod3_chr5:136987018-136996648	ENSMUSG00000004846	ENSMUSG00000004846	Plod3	chr5:136987018-136996648	protein_coding	24.9668	15.5844	31.2273	24.5365	28.7372	25.5719	28.736	23.8205	23.4389	29.9227	27.6954	32.3835
ENSMUSG00000004849_ENSMUSG00000004849_Ap1s1_chr5:137034992-137046135	ENSMUSG00000004849	ENSMUSG00000004849	Ap1s1	chr5:137034992-137046135	protein_coding	46.3054	36.9784	46.8383	41.2336	52.1189	41.4371	40.6187	41.2771	47.771	44.1039	46.9175	39.7352
ENSMUSG00000004864_ENSMUSG00000004864_Mapk13_chr17:28769306-28778698	ENSMUSG00000004864	ENSMUSG00000004864	Mapk13	chr17:28769306-28778698	protein_coding	0.522194	0.709976	0.598899	0.52383	0.498644	0.709204	0.523946	0.211178	0.366135	0.390795	0.634402	0.868694
ENSMUSG00000004865_ENSMUSG00000004865_Srpk1_chr17:28587647-28622521	ENSMUSG00000004865	ENSMUSG00000004865	Srpk1	chr17:28587647-28622521	protein_coding	9.68551	11.7703	11.5845	10.9255	8.57324	8.38266	16.7517	14.2403	11.1322	18.0613	14.2931	18.0442
ENSMUSG00000004872_ENSMUSG00000004872_Pax3_chr1:78101266-78197134	ENSMUSG00000004872	ENSMUSG00000004872	Pax3	chr1:78101266-78197134	protein_coding	0	0	0	0	0	0.0228861	0	0	0	0	0	0
ENSMUSG00000004880_ENSMUSG00000004880_Lbr_chr1:181815315-181842401	ENSMUSG00000004880	ENSMUSG00000004880	Lbr	chr1:181815315-181842401	protein_coding	4.0903	3.85735	4.34611	4.54523	4.29031	4.08939	2.28522	2.85664	2.21156	4.16631	4.97696	3.75492
ENSMUSG00000004885_ENSMUSG00000004885_Crabp2_chr3:87948665-87953376	ENSMUSG00000004885	ENSMUSG00000004885	Crabp2	chr3:87948665-87953376	protein_coding	0.114295	0	0.154621	0.0950883	0.309687	0.193215	0.399754	0.229399	0.119535	0.364486	0.690459	0.682891
ENSMUSG00000004891_ENSMUSG00000004891_Nes_chr3:87971077-87980451	ENSMUSG00000004891	ENSMUSG00000004891	Nes	chr3:87971077-87980451	protein_coding	5.06283	5.69623	5.74894	6.34718	7.17298	4.41324	23.0216	23.3128	17.8422	20.0558	18.247	22.267
ENSMUSG00000004892_ENSMUSG00000004892_Bcan_chr3:87987530-88000356	ENSMUSG00000004892	ENSMUSG00000004892	Bcan	chr3:87987530-88000356	protein_coding	0.0812676	0.0229097	0.0369511	0.0225756	0.0245439	0.022916	0	0	0	0.0216777	0.0410428	0.0539889
ENSMUSG00000004894_ENSMUSG00000004894_Hapln2_chr3:88021749-88027583	ENSMUSG00000004894	ENSMUSG00000004894	Hapln2	chr3:88021749-88027583	protein_coding	0	0	0.123136	0	0	0	0	0	0	0	0.0294479	0
ENSMUSG00000004895_ENSMUSG00000004895_Prcc_chr3:87858899-87885608	ENSMUSG00000004895	ENSMUSG00000004895	Prcc	chr3:87858899-87885608	protein_coding	12.8999	12.0605	13.6974	12.7871	13.5022	12.1684	21.9739	23.8767	22.7472	17.4141	17.2815	15.6415
ENSMUSG00000004896_ENSMUSG00000004896_Rrnad1_chr3:87922600-87930717	ENSMUSG00000004896	ENSMUSG00000004896	Rrnad1	chr3:87922600-87930717	protein_coding	7.50244	8.21962	8.95131	8.54415	8.34469	8.26702	6.69277	8.18177	6.80631	8.28283	7.22787	7.91427
ENSMUSG00000004897_ENSMUSG00000004897_Hdgf_chr3:87906320-87916132	ENSMUSG00000004897	ENSMUSG00000004897	Hdgf	chr3:87906320-87916132	protein_coding	73.9986	76.8481	82.9932	77.384	74.1321	70.729	92.481	92.3414	91.441	95.1153	86.5258	95.243
ENSMUSG00000004902_ENSMUSG00000004902_Slc25a18_chr6:120773767-120793982	ENSMUSG00000004902	ENSMUSG00000004902	Slc25a18	chr6:120773767-120793982	protein_coding	0.499776	0.24176	0.630369	0.237795	0.45209	0.181113	0.100171	0.215694	0.149594	0.0570256	0.107997	0.0711215
ENSMUSG00000004929_ENSMUSG00000004929_Thop1_chr10:81070034-81082559	ENSMUSG00000004929	ENSMUSG00000004929	Thop1	chr10:81070034-81082559	protein_coding	5.37302	4.0836	6.69105	5.33807	7.77501	4.68902	4.67946	5.27152	5.92037	8.47927	6.76496	10.2909
ENSMUSG00000004931_ENSMUSG00000004931_Apba3_chr10:81268171-81273246	ENSMUSG00000004931	ENSMUSG00000004931	Apba3	chr10:81268171-81273246	protein_coding	26.1819	28.6663	33.3545	28.1925	31.8868	29.2865	32.7384	33.7361	38.6485	32.4346	26.6771	28.5651
ENSMUSG00000004933_ENSMUSG00000004933_Matk_chr10:81252934-81263365	ENSMUSG00000004933	ENSMUSG00000004933	Matk	chr10:81252934-81263365	protein_coding	0.281026	0.544852	0.440103	0.279287	0.441265	0.459913	0.971201	1.23192	0.449491	0.652369	1.02067	0.721607
ENSMUSG00000004934_ENSMUSG00000004934_Pias4_chr10:81153265-81167923	ENSMUSG00000004934	ENSMUSG00000004934	Pias4	chr10:81153265-81167923	protein_coding	10.7255	9.92285	9.76657	9.12881	13.8342	10.4698	10.8343	7.20862	9.64825	9.10574	10.0827	9.60912
ENSMUSG00000004936_ENSMUSG00000004936_Map2k1_chr9:64185769-64253631	ENSMUSG00000004936	ENSMUSG00000004936	Map2k1	chr9:64185769-64253631	protein_coding	28.2331	27.035	25.4943	27.3517	25.2807	25.058	20.4769	19.8107	21.259	19.7195	21.7707	20.1056
ENSMUSG00000004937_ENSMUSG00000004937_Sgta_chr10:81044074-81060178	ENSMUSG00000004937	ENSMUSG00000004937	Sgta	chr10:81044074-81060178	protein_coding	92.5006	84.1518	100.967	98.4868	103.526	95.2184	84.0781	84.6033	87.408	79.5801	69.8799	70.9841
ENSMUSG00000004939_ENSMUSG00000004939_Nmrk2_chr10:81198169-81202037	ENSMUSG00000004939	ENSMUSG00000004939	Nmrk2	chr10:81198169-81202037	protein_coding	0	0.128795	0.483371	0	0.0918613	0	0.677196	1.38184	0.585169	0.608409	0.396827	0.404402
ENSMUSG00000004945_ENSMUSG00000004945_Tmem242_chr17:5410863-5440260	ENSMUSG00000004945	ENSMUSG00000004945	Tmem242	chr17:5410863-5440260	protein_coding	110.924	108.753	106.67	113.115	107.643	114.361	87.4777	93.7506	93.7132	82.4958	74.6164	75.1883
ENSMUSG00000004947_ENSMUSG00000004947_Dtx2_chr5:135994799-136032872	ENSMUSG00000004947	ENSMUSG00000004947	Dtx2	chr5:135994799-136032872	protein_coding	6.61503	7.17476	9.05331	11.5892	10.4833	7.85978	4.06415	3.97769	4.35388	5.68489	5.46981	7.2086
ENSMUSG00000004948_ENSMUSG00000004948_Zp3_chr5:135980098-135988624	ENSMUSG00000004948	ENSMUSG00000004948	Zp3	chr5:135980098-135988624	protein_coding	0.0742074	0	0.0503855	0	0	0	0	0	0	0	0	0
ENSMUSG00000004951_ENSMUSG00000004951_Hspb1_chr5:135887918-135889563	ENSMUSG00000004951	ENSMUSG00000004951	Hspb1	chr5:135887918-135889563	protein_coding	50.3096	48.0825	53.6346	44.2326	53.3402	45.9274	172.456	191.024	210.499	110.002	127.544	117.524
ENSMUSG00000004952_ENSMUSG00000004952_Rasa4_chr5:136083915-136111860	ENSMUSG00000004952	ENSMUSG00000004952	Rasa4	chr5:136083915-136111860	protein_coding	6.97019	4.56182	4.445	6.22335	5.22159	4.99724	2.65423	3.05134	2.78624	2.75742	3.4531	2.97879
ENSMUSG00000004961_ENSMUSG00000004961_Syt5_chr7:4539767-4546567	ENSMUSG00000004961	ENSMUSG00000004961	Syt5	chr7:4539767-4546567	protein_coding	0.107596	0.0910489	0.182994	0.0448107	0.24348	0.136495	0.0377843	0	0.0563995	0.0860036	0.0814294	0.535984
ENSMUSG00000004980_ENSMUSG00000004980_Hnrnpa2b1_chr6:51460433-51469894	ENSMUSG00000004980	ENSMUSG00000004980	Hnrnpa2b1	chr6:51460433-51469894	protein_coding	221.343	221.489	211.726	249.445	239.776	241.001	291.474	295.919	282.531	288.736	281.751	300.921
ENSMUSG00000004988_ENSMUSG00000004988_Fxyd4_chr6:117933728-117937335	ENSMUSG00000004988	ENSMUSG00000004988	Fxyd4	chr6:117933728-117937335	protein_coding	0	0	0	0	0	0	0	0	0	0	0.0631003	0.0831383
ENSMUSG00000004994_ENSMUSG00000004994_Ccdc130_chr8:84257794-84270380	ENSMUSG00000004994	ENSMUSG00000004994	Ccdc130	chr8:84257794-84270380	protein_coding	7.04999	4.97335	7.33226	5.31221	6.74801	6.3505	10.0203	6.48908	9.32942	6.62731	8.38134	6.61851
ENSMUSG00000004996_ENSMUSG00000004996_Mri1_chr8:84249905-84257326	ENSMUSG00000004996	ENSMUSG00000004996	Mri1	chr8:84249905-84257326	protein_coding	6.86997	3.21491	8.52223	6.32183	7.55657	4.76608	1.87457	3.89936	2.39515	2.21584	2.95507	3.92778
ENSMUSG00000005034_ENSMUSG00000005034_Prkacb_chr3:146729578-146812960	ENSMUSG00000005034	ENSMUSG00000005034	Prkacb	chr3:146729578-146812960	protein_coding	17.6299	16.4277	15.7189	16.2881	15.8519	14.7456	12.968	14.349	13.2715	13.4019	12.5935	12.4977
ENSMUSG00000005043_ENSMUSG00000005043_Sgsh_chr11:119343424-119355536	ENSMUSG00000005043	ENSMUSG00000005043	Sgsh	chr11:119343424-119355536	protein_coding	3.74126	3.18776	4.92227	3.57174	3.64404	3.4328	1.13393	1.21326	0.845123	1.44028	1.4869	2.76704
ENSMUSG00000005045_ENSMUSG00000005045_Chd5_chr4:152338650-152390194	ENSMUSG00000005045	ENSMUSG00000005045	Chd5	chr4:152338650-152390194	protein_coding	0.0372026	0.0116099	0.0281156	0.052783	0.0590277	0.0236394	0.0524151	0.0138932	0.0432538	0.088009	0.0729693	0.0684551
ENSMUSG00000005054_ENSMUSG00000005054_Cstb_chr10:78425669-78427619	ENSMUSG00000005054	ENSMUSG00000005054	Cstb	chr10:78425669-78427619	protein_coding	85.3233	92.1299	86.2875	96.2189	85.3277	95.1749	95.7691	104.479	92.6306	86.3139	103.045	97.6878
ENSMUSG00000005057_ENSMUSG00000005057_Sh2b2_chr5:136218148-136244903	ENSMUSG00000005057	ENSMUSG00000005057	Sh2b2	chr5:136218148-136244903	protein_coding	25.3585	29.3848	29.944	25.7344	35.1123	34.4331	37.9695	40.0146	42.086	32.4424	28.2879	21.6412
ENSMUSG00000005069_ENSMUSG00000005069_Pex5_chr6:124396815-124415067	ENSMUSG00000005069	ENSMUSG00000005069	Pex5	chr6:124396815-124415067	protein_coding	36.1542	38.2193	37.9131	35.5988	42.9206	42.1969	53.6437	47.9807	52.0633	48.4541	42.9961	47.7261
ENSMUSG00000005078_ENSMUSG00000005078_Jkamp_chr12:72085588-72101461	ENSMUSG00000005078	ENSMUSG00000005078	Jkamp	chr12:72085588-72101461	protein_coding	14.2563	10.8906	11.306	12.7636	10.3572	9.81785	7.79396	9.64859	8.58316	8.23216	6.60216	6.63064
ENSMUSG00000005087_ENSMUSG00000005087_Cd44_chr2:102811140-102901665	ENSMUSG00000005087	ENSMUSG00000005087	Cd44	chr2:102811140-102901665	protein_coding	1.12797	1.26899	1.48257	1.28753	1.26191	1.02879	7.63189	7.08253	5.93126	9.63286	15.4292	15.5647
ENSMUSG00000005089_ENSMUSG00000005089_Slc1a2_chr2:102658658-102790784	ENSMUSG00000005089	ENSMUSG00000005089	Slc1a2	chr2:102658658-102790784	protein_coding	0	0	0.00995158	0	0	0	0	0	0.0496505	0	0	0
ENSMUSG00000005102_ENSMUSG00000005102_Eif2ak4_chr2:118388617-118475234	ENSMUSG00000005102	ENSMUSG00000005102	Eif2ak4	chr2:118388617-118475234	protein_coding	3.22662	3.00856	3.52019	3.99832	3.43883	4.3182	2.17573	2.1206	2.04415	3.37462	3.12238	3.63882
ENSMUSG00000005103_ENSMUSG00000005103_Wdr1_chr5:38526813-38561666	ENSMUSG00000005103	ENSMUSG00000005103	Wdr1	chr5:38526813-38561666	protein_coding	36.8323	37.4945	40.6799	42.7641	41.2029	40.3661	43.3949	39.3231	38.1734	56.0617	58.5009	66.2936
ENSMUSG00000005107_ENSMUSG00000005107_Slc2a9_chr5:38349272-38503143	ENSMUSG00000005107	ENSMUSG00000005107	Slc2a9	chr5:38349272-38503143	protein_coding	1.00787	0.781593	0.886186	1.27791	1.4587	1.39279	0.57543	0.420753	0.238187	1.11196	0.558215	0.748898
ENSMUSG00000005124_ENSMUSG00000005124_Wisp1_chr15:66891319-66923201	ENSMUSG00000005124	ENSMUSG00000005124	Wisp1	chr15:66891319-66923201	protein_coding	0.054547	0.0143358	0	0.056531	0.049759	0.0430332	0.0477495	0.221534	0.0356015	0.0135739	0.0899431	0.11828
ENSMUSG00000005125_ENSMUSG00000005125_Ndrg1_chr15:66929320-66969640	ENSMUSG00000005125	ENSMUSG00000005125	Ndrg1	chr15:66929320-66969640	protein_coding	14.5675	10.9474	14.912	12.7286	15.1506	11.1793	5.26168	6.02555	6.71572	10.6313	9.84459	9.38613
ENSMUSG00000005131_ENSMUSG00000005131_4930550C14Rik_chr9:53405285-53432803	ENSMUSG00000005131	ENSMUSG00000005131	4930550C14Rik	chr9:53405285-53432803	protein_coding	0.0803935	0.272278	0.272769	0.267713	0.145398	0.135945	0	0	0	0	0.0607829	0
ENSMUSG00000005142_ENSMUSG00000005142_Man2b1_chr8:85083268-85098739	ENSMUSG00000005142	ENSMUSG00000005142	Man2b1	chr8:85083268-85098739	protein_coding	10.4486	10.2311	11.0331	12.2998	11.3303	10.3213	4.86078	4.947	4.79739	6.80067	6.10201	6.84145
ENSMUSG00000005148_ENSMUSG00000005148_Klf5_chr14:99298690-99313405	ENSMUSG00000005148	ENSMUSG00000005148	Klf5	chr14:99298690-99313405	protein_coding	0.109442	0.0926126	0.335009	0.410207	0.297178	0.462783	0.307441	0.275898	0.286824	0.174951	0.289882	0.327104
ENSMUSG00000005150_ENSMUSG00000005150_Wdr83_chr8:85075034-85081306	ENSMUSG00000005150	ENSMUSG00000005150	Wdr83	chr8:85075034-85081306	protein_coding	10.2018	8.35495	10.4081	10.066	10.2113	8.9151	11.4609	11.3373	12.211	11.9061	11.7802	9.91018
ENSMUSG00000005161_ENSMUSG00000005161_Prdx2_chr8:84969586-84974834	ENSMUSG00000005161	ENSMUSG00000005161	Prdx2	chr8:84969586-84974834	protein_coding	167.014	177.421	192.083	199.53	187.857	177.13	138.078	135.221	126.511	159.211	156.248	166.345
ENSMUSG00000005198_ENSMUSG00000005198_Polr2a_chr11:69733996-69758637	ENSMUSG00000005198	ENSMUSG00000005198	Polr2a	chr11:69733996-69758637	protein_coding	14.0284	14.0572	16.8311	16.097	17.0056	15.4753	12.5125	12.1589	11.4032	15.2777	14.5109	16.2332
ENSMUSG00000005202_ENSMUSG00000005202_Shbg_chr11:69614803-69617905	ENSMUSG00000005202	ENSMUSG00000005202	Shbg	chr11:69614803-69617905	protein_coding	0	0	0	0	0	0	0	0	0	0	0	0
ENSMUSG00000005204_ENSMUSG00000005204_Senp3_chr11:69673114-69682084	ENSMUSG00000005204	ENSMUSG00000005204	Senp3	chr11:69673114-69682084	protein_coding	20.1863	24.7095	25.7313	20.8927	21.3254	25.0896	30.5001	35.6758	37.4643	26.5646	29.7635	26.8393
ENSMUSG00000005220_ENSMUSG00000005220_Corin_chr5:72300024-72504473	ENSMUSG00000005220	ENSMUSG00000005220	Corin	chr5:72300024-72504473	protein_coding	0.0374091	0.0316315	0.0383029	0.031181	0.0169506	0.0158228	0.0263354	0.0189146	0.0196344	0	0.0566988	0.0186385
ENSMUSG00000005225_ENSMUSG00000005225_Plekha8_chr6:54595110-54645839	ENSMUSG00000005225	ENSMUSG00000005225	Plekha8	chr6:54595110-54645839	protein_coding	3.39876	4.29928	3.80614	3.69781	3.76383	3.9535	6.22347	7.17084	6.03546	4.91606	4.87299	4.9405
ENSMUSG00000005232_ENSMUSG00000005232_G6pc2_chr2:69211072-69227841	ENSMUSG00000005232	ENSMUSG00000005232	G6pc2	chr2:69211072-69227841	protein_coding	0	0	0	0	0	0	0	0	0	0	0	0
ENSMUSG00000005233_ENSMUSG00000005233_Spc25_chr2:69193894-69206194	ENSMUSG00000005233	ENSMUSG00000005233	Spc25	chr2:69193894-69206194	protein_coding	0.506377	0.521303	0.815123	0.647208	0.78767	1.02157	0.156516	0.218209	0.0907409	0.539055	0.760683	0.241081
ENSMUSG00000005237_ENSMUSG00000005237_Dnahc2_chr11:69420808-69549110	ENSMUSG00000005237	ENSMUSG00000005237	Dnahc2	chr11:69420808-69549110	protein_coding	0.437377	0.0579891	0.0169606	0.107431	0.0506405	0.144332	0.0174864	0.0188423	0.0130304	0.0695874	0.143601	0.037107
ENSMUSG00000005251_ENSMUSG00000005251_Ripk4_chr16:97741932-97763737	ENSMUSG00000005251	ENSMUSG00000005251	Ripk4	chr16:97741932-97763737	protein_coding	2.06371	1.91343	2.36659	2.55472	1.57234	2.10104	0.932202	1.45773	1.89029	2.45748	2.51432	2.06075
ENSMUSG00000005262_ENSMUSG00000005262_Ufd1l_chr16:18811778-18835261	ENSMUSG00000005262	ENSMUSG00000005262	Ufd1l	chr16:18811778-18835261	protein_coding	35.5067	31.4092	36.893	33.7252	44.9402	32.5787	39.4922	37.974	43.1854	51.0285	40.5136	42.2678
ENSMUSG00000005267_ENSMUSG00000005267_Zfp287_chr11:62700355-62731905	ENSMUSG00000005267	ENSMUSG00000005267	Zfp287	chr11:62700355-62731905	protein_coding	0.50353	0.511161	0.427918	0.438548	0.800112	0.402158	0.289641	0.150338	0.0577391	0.332342	0.418155	0.415681
ENSMUSG00000005268_ENSMUSG00000005268_Prlr_chr15:10177237-10349180	ENSMUSG00000005268	ENSMUSG00000005268	Prlr	chr15:10177237-10349180	protein_coding	0.10266	0.0650889	0.075966	0.214157	0.317329	0.380079	0.229029	0.418922	0.468075	0.556643	0.361548	0.494541
ENSMUSG00000005299_ENSMUSG00000005299_Letm1_chr5:33739672-33782817	ENSMUSG00000005299	ENSMUSG00000005299	Letm1	chr5:33739672-33782817	protein_coding	41.8183	41.2172	45.1046	40.3832	42.2124	48.0146	63.3325	64.3264	66.9088	49.0384	42.6654	43.7502
ENSMUSG00000005312_ENSMUSG00000005312_Ubqln1_chr13:58176155-58215653	ENSMUSG00000005312	ENSMUSG00000005312	Ubqln1	chr13:58176155-58215653	protein_coding	30.909	31.2192	28.357	29.0496	30.6124	30.3742	59.8659	56.2219	63.3337	37.6619	39.3683	38.8228
ENSMUSG00000005320_ENSMUSG00000005320_Fgfr4_chr13:55152639-55168759	ENSMUSG00000005320	ENSMUSG00000005320	Fgfr4	chr13:55152639-55168759	protein_coding	0	0.0224907	0.0181387	0.576849	0.267052	0.0449945	0.244461	0.214618	0.308323	0.042564	0.0402934	0
ENSMUSG00000005338_ENSMUSG00000005338_Cadm3_chr1:173334253-173367695	ENSMUSG00000005338	ENSMUSG00000005338	Cadm3	chr1:173334253-173367695	protein_coding	3.87267	3.72551	3.93218	4.84156	3.79608	4.4559	4.65283	3.90087	4.43134	4.92771	6.02752	5.89368
ENSMUSG00000005339_ENSMUSG00000005339_Fcer1a_chr1:173221270-173227229	ENSMUSG00000005339	ENSMUSG00000005339	Fcer1a	chr1:173221270-173227229	protein_coding	0	0.0856103	0	0.420512	0	0	0.212273	0	0	0.0806187	0	0.10065
ENSMUSG00000005354_ENSMUSG00000005354_Txn2_chr15:77915046-77929006	ENSMUSG00000005354	ENSMUSG00000005354	Txn2	chr15:77915046-77929006	protein_coding	195.922	178.566	220.637	189.283	185.714	181.524	272.764	290.095	275.975	247.87	236.912	225.781
ENSMUSG00000005355_ENSMUSG00000005355_Casp14_chr10:78711996-78718293	ENSMUSG00000005355	ENSMUSG00000005355	Casp14	chr10:78711996-78718293	protein_coding	0	0	0	0	0	0	0	0	0	0	0	0
ENSMUSG00000005357_ENSMUSG00000005357_Slc1a6_chr10:78780495-78814825	ENSMUSG00000005357	ENSMUSG00000005357	Slc1a6	chr10:78780495-78814825	protein_coding	0	0	0	0.0366818	0	0	0	0	0	0	0	0.0438703
ENSMUSG00000005360_ENSMUSG00000005360_Slc1a3_chr15:8634123-8710764	ENSMUSG00000005360	ENSMUSG00000005360	Slc1a3	chr15:8634123-8710764	protein_coding	31.0587	37.2296	29.835	41.605	35.2203	41.5805	27.9273	21.6464	25.4331	25.3321	25.4867	29.5605
ENSMUSG00000005362_ENSMUSG00000005362_Crbn_chr6:106778248-106800074	ENSMUSG00000005362	ENSMUSG00000005362	Crbn	chr6:106778248-106800074	protein_coding	24.2524	18.6557	18.641	19.2024	18.63	17.9205	13.1926	13.6856	14.7388	13.1276	11.5687	12.0889
ENSMUSG00000005364_ENSMUSG00000005364_Il5ra_chr6:106711974-106745109	ENSMUSG00000005364	ENSMUSG00000005364	Il5ra	chr6:106711974-106745109	protein_coding	0	0	0	0	0	0	0	0	0	0	0	0
ENSMUSG00000005370_ENSMUSG00000005370_Msh6_chr17:87975049-87990883	ENSMUSG00000005370	ENSMUSG00000005370	Msh6	chr17:87975049-87990883	protein_coding	4.60918	4.57303	5.0329	4.45636	5.08679	4.55793	2.27829	1.78144	1.72034	2.45965	2.93372	2.69474
ENSMUSG00000005371_ENSMUSG00000005371_Fbxo11_chr17:87990858-88065291	ENSMUSG00000005371	ENSMUSG00000005371	Fbxo11	chr17:87990858-88065291	protein_coding	21.6341	21.9238	19.4216	21.2973	23.1943	19.9848	12.9773	12.7226	13.7165	14.6645	17.8804	17.5531
ENSMUSG00000005373_ENSMUSG00000005373_Mlxipl_chr5:135106890-135138382	ENSMUSG00000005373	ENSMUSG00000005373	Mlxipl	chr5:135106890-135138382	protein_coding	146.502	169.371	172.611	119.115	145.376	143.638	69.409	62.3607	66.9773	72.6669	69.4636	68.7642
ENSMUSG00000005374_ENSMUSG00000005374_Tbl2_chr5:135149656-135163873	ENSMUSG00000005374	ENSMUSG00000005374	Tbl2	chr5:135149656-135163873	protein_coding	4.20556	3.16348	5.12511	4.82565	3.89128	5.75073	7.04714	6.80013	8.5797	8.32879	7.39186	7.56928
ENSMUSG00000005378_ENSMUSG00000005378_Wbscr22_chr5:135052956-135064959	ENSMUSG00000005378	ENSMUSG00000005378	Wbscr22	chr5:135052956-135064959	protein_coding	8.26383	9.14641	12.3018	10.727	11.8445	8.95059	14.4349	24.5003	19.7188	15.6429	18.3994	19.3085
ENSMUSG00000005397_ENSMUSG00000005397_Nid1_chr13:13437601-13512275	ENSMUSG00000005397	ENSMUSG00000005397	Nid1	chr13:13437601-13512275	protein_coding	28.8214	25.8604	28.7831	36.5527	30.7959	29.3903	28.8039	25.8042	29.2809	37.501	43.1677	40.2526
ENSMUSG00000005410_ENSMUSG00000005410_Mcm5_chr8:75109527-75128439	ENSMUSG00000005410	ENSMUSG00000005410	Mcm5	chr8:75109527-75128439	protein_coding	0.670381	1.06845	1.23112	1.00995	0.911131	1.02517	0.526142	0.286672	0.378849	0.76347	0.527404	0.8479
ENSMUSG00000005413_ENSMUSG00000005413_Hmox1_chr8:75093590-75100596	ENSMUSG00000005413	ENSMUSG00000005413	Hmox1	chr8:75093590-75100596	protein_coding	7.3426	7.26944	8.09273	8.591	7.69483	6.94321	98.6025	87.9684	82.5093	139.065	222.759	223.663
ENSMUSG00000005417_ENSMUSG00000005417_Mprip_chr11:59661304-59780860	ENSMUSG00000005417	ENSMUSG00000005417	Mprip	chr11:59661304-59780860	protein_coding	65.8552	62.0728	71.7098	72.9091	71.3269	63.048	81.0358	74.2341	76.9948	78.3418	81.3536	80.07
ENSMUSG00000005442_ENSMUSG00000005442_Cic_chr7:25267703-25294159	ENSMUSG00000005442	ENSMUSG00000005442	Cic	chr7:25267703-25294159	protein_coding	15.9008	16.4618	17.332	16.3923	16.7501	16.0324	16.7767	12.6441	11.4197	17.6134	23.832	22.7803
ENSMUSG00000005447_ENSMUSG00000005447_Pafah1b3_chr7:25295048-25297986	ENSMUSG00000005447	ENSMUSG00000005447	Pafah1b3	chr7:25295048-25297986	protein_coding	1.07304	1.20903	2.26985	1.76206	1.84786	2.06272	2.15012	1.59095	1.79153	1.67895	1.79863	1.15532
ENSMUSG00000005465_ENSMUSG00000005465_Il27ra_chr8:84030286-84042575	ENSMUSG00000005465	ENSMUSG00000005465	Il27ra	chr8:84030286-84042575	protein_coding	0.744246	0.658124	0.622559	0.507401	0.612865	0.457854	0.19033	0.239195	0.177466	0.595399	0.589283	0.40451
ENSMUSG00000005469_ENSMUSG00000005469_Prkaca_chr8:83972977-83996445	ENSMUSG00000005469	ENSMUSG00000005469	Prkaca	chr8:83972977-83996445	protein_coding	138.571	125.961	139.699	141.668	144.957	145.435	103.642	96.5837	103.68	85.7907	69.5791	76.3591
ENSMUSG00000005470_ENSMUSG00000005470_Asf1b_chr8:83955506-83970197	ENSMUSG00000005470	ENSMUSG00000005470	Asf1b	chr8:83955506-83970197	protein_coding	1.36252	1.50798	1.141	1.575	2.08942	1.15233	1.10427	1.21567	2.48324	0.880563	0.753221	0.626544
ENSMUSG00000005474_ENSMUSG00000005474_Myl10_chr5:136693145-136701094	ENSMUSG00000005474	ENSMUSG00000005474	Myl10	chr5:136693145-136701094	protein_coding	0	0	0	0	0	0	0.093957	0.134754	0	0	0	0
ENSMUSG00000005481_ENSMUSG00000005481_Ddx39_chr8:83715176-83726892	ENSMUSG00000005481	ENSMUSG00000005481	Ddx39	chr8:83715176-83726892	protein_coding	7.82665	6.82505	7.15271	7.33076	7.82186	5.68119	17.7258	21.9828	15.7144	21.4618	21.9663	24.6755
ENSMUSG00000005483_ENSMUSG00000005483_Dnajb1_chr8:83608174-83611902	ENSMUSG00000005483	ENSMUSG00000005483	Dnajb1	chr8:83608174-83611902	protein_coding	10.1574	10.2294	11.4217	11.015	10.1476	10.2279	28.9579	26.6535	29.4682	21.7276	23.7138	24.1372
ENSMUSG00000005493_ENSMUSG00000005493_Msh4_chr3:153857146-153906138	ENSMUSG00000005493	ENSMUSG00000005493	Msh4	chr3:153857146-153906138	protein_coding	0	0	0	0	0	0	0	0	0	0	0	0
ENSMUSG00000005501_ENSMUSG00000005501_Usp40_chr1:87945120-88008551	ENSMUSG00000005501	ENSMUSG00000005501	Usp40	chr1:87945120-88008551	protein_coding	6.67796	5.95042	6.09018	6.19435	5.5871	5.43244	5.3165	5.55948	6.63353	5.27768	5.33323	5.20465
ENSMUSG00000005503_ENSMUSG00000005503_Evx1_chr6:52313497-52318378	ENSMUSG00000005503	ENSMUSG00000005503	Evx1	chr6:52313497-52318378	protein_coding	0	0	0	0	0	0	0	0	0	0	0	0
ENSMUSG00000005505_ENSMUSG00000005505_Kbtbd4_chr2:90904739-90911626	ENSMUSG00000005505	ENSMUSG00000005505	Kbtbd4	chr2:90904739-90911626	protein_coding	3.98158	3.92284	5.31892	2.62029	6.53822	4.75492	7.07148	5.21904	5.44522	4.70777	3.79631	5.14555
ENSMUSG00000005506_ENSMUSG00000005506_Celf1_chr2:90940381-91019497	ENSMUSG00000005506	ENSMUSG00000005506	Celf1	chr2:90940381-91019497	protein_coding	16.0831	15.067	15.1806	14.4097	13.8623	15.335	18.4599	18.0384	18.8431	16.5089	18.4313	19.3236
ENSMUSG00000005510_ENSMUSG00000005510_Ndufs3_chr2:90894633-90904827	ENSMUSG00000005510	ENSMUSG00000005510	Ndufs3	chr2:90894633-90904827	protein_coding	325.774	321.413	345.23	332.68	333.267	339.897	278.702	272.524	269.286	299.148	274.383	264.524
ENSMUSG00000005514_ENSMUSG00000005514_Por_chr5:135670032-135735326	ENSMUSG00000005514	ENSMUSG00000005514	Por	chr5:135670032-135735326	protein_coding	132.603	149.148	166.31	190.479	179.226	183.415	129.309	111.054	130.205	136.816	123.296	131.082
ENSMUSG00000005533_ENSMUSG00000005533_Igf1r_chr7:67952858-68226780	ENSMUSG00000005533	ENSMUSG00000005533	Igf1r	chr7:67952858-68226780	protein_coding	0.871265	0.834942	0.845744	1.42013	1.05283	0.917279	1.04947	0.959411	0.833341	1.59638	1.65787	2.10315
ENSMUSG00000005534_ENSMUSG00000005534_Insr_chr8:3150921-3279617	ENSMUSG00000005534	ENSMUSG00000005534	Insr	chr8:3150921-3279617	protein_coding	10.5693	10.7511	9.66093	11.8039	10.6673	11.3721	16.8	16.3948	16.6976	14.2938	14.478	14.4366
ENSMUSG00000005540_ENSMUSG00000005540_Fcer2a_chr8:3681736-3694174	ENSMUSG00000005540	ENSMUSG00000005540	Fcer2a	chr8:3681736-3694174	protein_coding	0.244456	0.137867	0.194261	0.169725	0.184481	0.137846	0.0286399	0.123392	0.0854697	0.0325846	0	0
ENSMUSG00000005547_ENSMUSG00000005547_Cyp2a5_chr7:26835304-26843548	ENSMUSG00000005547	ENSMUSG00000005547	Cyp2a5	chr7:26835304-26843548	protein_coding	0	0	0	0	0	0	0	0	0	0	0	0
ENSMUSG00000005553_ENSMUSG00000005553_Atp4a_chr7:30712208-30725535	ENSMUSG00000005553	ENSMUSG00000005553	Atp4a	chr7:30712208-30725535	protein_coding	0	0.0216225	0	0	0	0	0	0	0	0	0.173857	0
ENSMUSG00000005566_ENSMUSG00000005566_Trim28_chr7:13024151-13031035	ENSMUSG00000005566	ENSMUSG00000005566	Trim28	chr7:13024151-13031035	protein_coding	19.2191	17.3933	23.3855	21.1253	21.5731	18.582	22.9012	19.4672	15.703	24.2887	30.182	27.6323
ENSMUSG00000005575_ENSMUSG00000005575_Ube2m_chr7:13035119-13038275	ENSMUSG00000005575	ENSMUSG00000005575	Ube2m	chr7:13035119-13038275	protein_coding	90.7293	83.7997	112.087	100.743	89.2751	96.9395	137.273	124.904	131.783	130.972	117.508	124.088
ENSMUSG00000005580_ENSMUSG00000005580_Adcy9_chr16:4287528-4420498	ENSMUSG00000005580	ENSMUSG00000005580	Adcy9	chr16:4287528-4420498	protein_coding	14.3762	13.2167	15.4722	15.413	12.544	13.5502	2.80091	2.64259	3.00053	3.29533	2.8118	3.41123
ENSMUSG00000005583_ENSMUSG00000005583_Mef2c_chr13:83504033-83667079	ENSMUSG00000005583	ENSMUSG00000005583	Mef2c	chr13:83504033-83667079	protein_coding	2.50592	2.5924	2.89234	3.72364	3.21136	2.27875	1.44099	1.78559	1.49582	1.74809	1.7314	1.43482
ENSMUSG00000005609_ENSMUSG00000005609_Ctr9_chr7:111028950-111056377	ENSMUSG00000005609	ENSMUSG00000005609	Ctr9	chr7:111028950-111056377	protein_coding	10.5184	10.089	10.9909	11.762	11.0999	12.2264	12.8992	12.2715	13.3836	11.2971	10.0771	11.1412
ENSMUSG00000005610_ENSMUSG00000005610_Eif4g2_chr7:111067984-111083030	ENSMUSG00000005610	ENSMUSG00000005610	Eif4g2	chr7:111067984-111083030	protein_coding	121.21	117.346	103.937	124.061	109.849	120.486	283.61	291.086	278.128	230.915	239.567	249.958
ENSMUSG00000005611_ENSMUSG00000005611_Mrvi1_chr7:110868265-110982461	ENSMUSG00000005611	ENSMUSG00000005611	Mrvi1	chr7:110868265-110982461	protein_coding	2.01476	2.34628	1.85898	1.56519	2.18072	1.75666	1.11034	1.27404	0.916534	0.896576	1.08672	0.898205
ENSMUSG00000005615_ENSMUSG00000005615_Pcyt1a_chr16:32430920-32475070	ENSMUSG00000005615	ENSMUSG00000005615	Pcyt1a	chr16:32430920-32475070	protein_coding	19.3971	18.9837	19.6171	21.2658	17.9262	18.1809	18.7909	18.0921	17.8182	14.9718	15.4049	15.6917
ENSMUSG00000005621_ENSMUSG00000005621_Zfp592_chr7:80993680-81045164	ENSMUSG00000005621	ENSMUSG00000005621	Zfp592	chr7:80993680-81045164	protein_coding	11.4538	8.9704	10.5075	12.361	11.2007	11.6201	13.2858	14.8571	14.3352	18.4896	18.2569	21.438
ENSMUSG00000005625_ENSMUSG00000005625_Psmd4_chr3:95032693-95042614	ENSMUSG00000005625	ENSMUSG00000005625	Psmd4	chr3:95032693-95042614	protein_coding	74.185	66.8537	85.0822	82.7597	83.6694	82.7688	114.934	111.227	112.561	107.18	108.709	103.558
ENSMUSG00000005628_ENSMUSG00000005628_Tmod4_chr3:95124475-95129209	ENSMUSG00000005628	ENSMUSG00000005628	Tmod4	chr3:95124475-95129209	protein_coding	1.60012	2.21165	5.69257	4.70195	3.55693	2.87118	4.86048	7.727	3.25006	3.40064	3.94064	3.95366
ENSMUSG00000005640_ENSMUSG00000005640_Insrr_chr3:87796950-87816101	ENSMUSG00000005640	ENSMUSG00000005640	Insrr	chr3:87796950-87816101	protein_coding	0.0184752	0	0.0252595	0.0287393	0.0167446	0.0584906	0	0	0	0	0	0
ENSMUSG00000005649_ENSMUSG00000005649_Cabp5_chr7:13398131-13408887	ENSMUSG00000005649	ENSMUSG00000005649	Cabp5	chr7:13398131-13408887	protein_coding	0	0	0.0359036	0	0	0	0	0	0	0	0	0
ENSMUSG00000005656_ENSMUSG00000005656_Snx6_chr12:54746348-54795703	ENSMUSG00000005656	ENSMUSG00000005656	Snx6	chr12:54746348-54795703	protein_coding	19.1619	18.7386	17.5979	20.4545	18.961	20.2785	17.0826	16.2726	16.3066	18.4766	18.8053	19.6673
ENSMUSG00000005667_ENSMUSG00000005667_Mthfd2_chr6:83305690-83317606	ENSMUSG00000005667	ENSMUSG00000005667	Mthfd2	chr6:83305690-83317606	protein_coding	1.2355	1.43073	1.08163	1.4705	1.15867	1.06363	3.78321	2.93913	2.4526	5.46899	6.4138	4.39637
ENSMUSG00000005672_ENSMUSG00000005672_Kit_chr5:75574915-75656722	ENSMUSG00000005672	ENSMUSG00000005672	Kit	chr5:75574915-75656722	protein_coding	3.76738	5.21267	4.31118	3.19749	8.4177	3.56567	0.448096	1.58162	1.26205	1.30915	1.37606	1.9987
ENSMUSG00000005674_ENSMUSG00000005674_Tomm40l_chr1:171217801-171222514	ENSMUSG00000005674	ENSMUSG00000005674	Tomm40l	chr1:171217801-171222514	protein_coding	42.3345	42.1792	54.0731	44.1045	50.6546	45.6482	29.5007	29.1491	34.9422	40.2828	40.9858	43.8936
ENSMUSG00000005677_ENSMUSG00000005677_Nr1i3_chr1:171213969-171220701	ENSMUSG00000005677	ENSMUSG00000005677	Nr1i3	chr1:171213969-171220701	protein_coding	0.0597825	0.140527	0.0527769	0.139463	0	0.102335	0.0860886	0.181215	0.174277	0.20486	0.289125	0.0311908
ENSMUSG00000005681_ENSMUSG00000005681_Apoa2_chr1:171225053-171226379	ENSMUSG00000005681	ENSMUSG00000005681	Apoa2	chr1:171225053-171226379	protein_coding	1.31048	2.13036	1.45501	0.542879	2.34939	1.65813	2.71295	0.927549	0.903185	1.03568	0.491107	0
ENSMUSG00000005682_ENSMUSG00000005682_Pan2_chr10:128303334-128321358	ENSMUSG00000005682	ENSMUSG00000005682	Pan2	chr10:128303334-128321358	protein_coding	5.56871	5.5844	6.41459	5.9037	6.60519	5.95096	3.59683	3.83333	3.81523	3.56618	3.83478	3.47578
ENSMUSG00000005683_ENSMUSG00000005683_Cs_chr10:128337831-128362479	ENSMUSG00000005683	ENSMUSG00000005683	Cs	chr10:128337831-128362479	protein_coding	763.347	736.857	769.91	748.611	733.235	729.33	631.854	600.983	621.498	637.925	605.506	612.244
ENSMUSG00000005686_ENSMUSG00000005686_Ampd3_chr7:110768205-110812405	ENSMUSG00000005686	ENSMUSG00000005686	Ampd3	chr7:110768205-110812405	protein_coding	14.2839	13.1668	14.8463	12.5921	11.5006	10.7162	7.79395	6.83918	6.86153	11.8085	16.705	20.7323
ENSMUSG00000005687_ENSMUSG00000005687_Bcas2_chr3:103171654-103179166	ENSMUSG00000005687	ENSMUSG00000005687	Bcas2	chr3:103171654-103179166	protein_coding	23.8772	24.355	23.6131	24.03	24.6357	24.7846	21.6569	19.5969	21.219	23.7695	24.5035	23.1476
ENSMUSG00000005696_ENSMUSG00000005696_Sh2d1a_chrX:42502452-42523697	ENSMUSG00000005696	ENSMUSG00000005696	Sh2d1a	chrX:42502452-42523697	protein_coding	0	0.20745	0	0	0	0.166897	0	0.197005	0	0.114515	0.108487	0
ENSMUSG00000005698_ENSMUSG00000005698_Ctcf_chr8:105636567-105682922	ENSMUSG00000005698	ENSMUSG00000005698	Ctcf	chr8:105636567-105682922	protein_coding	16.6977	13.3419	13.4307	17.4394	14.1613	17.2609	13.6532	11.4065	16.5018	13.6137	11.0471	15.5053
ENSMUSG00000005699_ENSMUSG00000005699_Pard6a_chr8:105701153-105703493	ENSMUSG00000005699	ENSMUSG00000005699	Pard6a	chr8:105701153-105703493	protein_coding	5.21946	4.16203	5.92684	5.38457	4.58665	5.33877	3.06457	2.74363	3.99565	2.54972	2.35732	2.48104
ENSMUSG00000005705_ENSMUSG00000005705_Agrp_chr8:105566699-105568298	ENSMUSG00000005705	ENSMUSG00000005705	Agrp	chr8:105566699-105568298	protein_coding	0	0	0.12287	0.151897	0.164714	0.15442	0	0	0	0	0	0
ENSMUSG00000005716_ENSMUSG00000005716_Pvalb_chr15:78191113-78206400	ENSMUSG00000005716	ENSMUSG00000005716	Pvalb	chr15:78191113-78206400	protein_coding	33.6123	61.3753	106.96	141.019	102.408	55.1147	92.6729	192.289	105.822	71.0277	83.1915	82.6082
ENSMUSG00000005718_ENSMUSG00000005718_Tfap4_chr16:4544660-4559720	ENSMUSG00000005718	ENSMUSG00000005718	Tfap4	chr16:4544660-4559720	protein_coding	4.08678	2.09656	3.67113	3.83939	2.67702	2.61086	0.763901	0.745974	0.182389	1.28637	1.08622	0.909691
ENSMUSG00000005732_ENSMUSG00000005732_Ranbp1_chr16:18239783-18248732	ENSMUSG00000005732	ENSMUSG00000005732	Ranbp1	chr16:18239783-18248732	protein_coding	32.2298	27.3108	29.2256	32.0723	30.268	27.1047	45.302	43.5602	46.7867	57.9169	55.771	66.032
ENSMUSG00000005763_ENSMUSG00000005763_Cd247_chr1:165788680-165877276	ENSMUSG00000005763	ENSMUSG00000005763	Cd247	chr1:165788680-165877276	protein_coding	2.9658	1.83782	1.60354	1.91093	1.22335	1.45559	0.19774	0	0	0.0861754	0.127855	0.280543
ENSMUSG00000005774_ENSMUSG00000005774_Rfx5_chr3:94954074-94961561	ENSMUSG00000005774	ENSMUSG00000005774	Rfx5	chr3:94954074-94961561	protein_coding	3.15204	3.97249	4.19816	4.24022	4.46947	3.32609	1.25161	0.702248	0.938269	1.66348	1.8068	2.11926
ENSMUSG00000005779_ENSMUSG00000005779_Psmb4_chr3:94884092-94886961	ENSMUSG00000005779	ENSMUSG00000005779	Psmb4	chr3:94884092-94886961	protein_coding	88.5815	77.0773	91.9589	93.5839	93.0397	92.6609	108.731	98.6877	96.8189	115.514	107.2	103.631
ENSMUSG00000005800_ENSMUSG00000005800_Mmp8_chr9:7558428-7568486	ENSMUSG00000005800	ENSMUSG00000005800	Mmp8	chr9:7558428-7568486	protein_coding	0.0737995	0.0624266	0	0.0614911	0	0	0.285398	0.186314	0.15484	0.118064	0.838298	0.477981
ENSMUSG00000005802_ENSMUSG00000005802_Slc30a4_chr2:122681232-122702663	ENSMUSG00000005802	ENSMUSG00000005802	Slc30a4	chr2:122681232-122702663	protein_coding	2.70138	2.75409	2.71773	2.77056	2.37579	2.33513	3.42429	3.17052	3.02608	3.1034	3.76559	3.98131
ENSMUSG00000005803_ENSMUSG00000005803_Sqrdl_chr2:122765236-122809569	ENSMUSG00000005803	ENSMUSG00000005803	Sqrdl	chr2:122765236-122809569	protein_coding	44.5598	44.7178	44.3942	49.5062	42.6742	43.7188	28.6851	28.7333	27.424	34.7679	28.1298	32.1873
ENSMUSG00000005804_ENSMUSG00000005804_Bloc1s6_chr2:122738502-122749475	ENSMUSG00000005804	ENSMUSG00000005804	Bloc1s6	chr2:122738502-122749475	protein_coding	13.2029	12.1442	11.2474	12.265	8.14799	10.1742	9.38398	9.62847	10.835	10.0716	11.5807	11.5341
ENSMUSG00000005813_ENSMUSG00000005813_Metap1_chr3:138458959-138489382	ENSMUSG00000005813	ENSMUSG00000005813	Metap1	chr3:138458959-138489382	protein_coding	8.38702	9.63866	10.4666	9.87815	9.71223	10.5667	13.1642	14.2249	13.5141	11.4934	11.5509	12.3417
ENSMUSG00000005823_ENSMUSG00000005823_Gpr108_chr17:57234913-57247641	ENSMUSG00000005823	ENSMUSG00000005823	Gpr108	chr17:57234913-57247641	protein_coding	22.1867	20.33	24.1335	25.9249	24.5807	24.2598	22.379	21.6835	21.6806	19.9704	16.631	17.7111
ENSMUSG00000005824_ENSMUSG00000005824_Tnfsf14_chr17:57189491-57194189	ENSMUSG00000005824	ENSMUSG00000005824	Tnfsf14	chr17:57189491-57194189	protein_coding	0.100309	0	0.136527	0.167115	0.136212	0.0848363	0.211403	0.252968	0	0.280669	1.02498	1.1493
ENSMUSG00000005836_ENSMUSG00000005836_Gata6_chr18:11052509-11085635	ENSMUSG00000005836	ENSMUSG00000005836	Gata6	chr18:11052509-11085635	protein_coding	0.555018	0.375513	0.586695	0.601294	0.477714	0.42256	0.331914	0.392627	0.262105	0.377512	0.58862	0.52542
ENSMUSG00000005846_ENSMUSG00000005846_Rsl1d1_chr16:11192969-11203331	ENSMUSG00000005846	ENSMUSG00000005846	Rsl1d1	chr16:11192969-11203331	protein_coding	20.4483	20.602	19.6105	18.3417	16.2451	20.1574	24.3713	22.961	24.0162	22.117	22.0237	27.6387
ENSMUSG00000005864_ENSMUSG00000005864_Cnga2_chrX:71991848-72010218	ENSMUSG00000005864	ENSMUSG00000005864	Cnga2	chrX:71991848-72010218	protein_coding	0	0	0.0197839	0.0241778	0.026285	0.0490857	0	0.0293171	0.0304457	0	0.0219771	0
ENSMUSG00000005871_ENSMUSG00000005871_Apc_chr18:34220923-34322189	ENSMUSG00000005871	ENSMUSG00000005871	Apc	chr18:34220923-34322189	protein_coding	3.07367	2.99613	2.76284	3.77142	3.10327	3.03485	4.21408	4.19715	4.0845	3.90434	4.34003	3.92213
ENSMUSG00000005873_ENSMUSG00000005873_Reep5_chr18:34344888-34373415	ENSMUSG00000005873	ENSMUSG00000005873	Reep5	chr18:34344888-34373415	protein_coding	59.3194	57.033	67.6363	75.1118	69.5834	68.6016	51.7507	51.4242	49.9444	53.5087	49.4873	49.3353
ENSMUSG00000005881_ENSMUSG00000005881_Ergic3_chr2:156008044-156018279	ENSMUSG00000005881	ENSMUSG00000005881	Ergic3	chr2:156008044-156018279	protein_coding	44.2424	42.3894	50.2484	48.107	49.1741	47.713	38.4102	41.7433	38.1738	41.6663	38.7676	34.5732
ENSMUSG00000005882_ENSMUSG00000005882_Uqcc_chr2:155846893-155930310	ENSMUSG00000005882	ENSMUSG00000005882	Uqcc	chr2:155846893-155930310	protein_coding	151.661	140.284	163.243	146.662	148.382	131.368	94.7441	89.5023	88.1935	116.497	108.933	116.346
ENSMUSG00000005883_ENSMUSG00000005883_Spo11_chr2:172977699-172993576	ENSMUSG00000005883	ENSMUSG00000005883	Spo11	chr2:172977699-172993576	protein_coding	0.0485918	0.020546	0	0	0	0.0505972	0	0	0	0	0	0.0242115
ENSMUSG00000005886_ENSMUSG00000005886_Ncoa2_chr1:13139104-13374083	ENSMUSG00000005886	ENSMUSG00000005886	Ncoa2	chr1:13139104-13374083	protein_coding	4.23508	4.40912	4.94131	5.16795	4.69749	4.59533	3.39936	2.69217	3.1995	3.7156	3.86253	3.46046
ENSMUSG00000005891_ENSMUSG00000005891_Prl4a1_chr13:28016211-28023548	ENSMUSG00000005891	ENSMUSG00000005891	Prl4a1	chr13:28016211-28023548	protein_coding	0	0	0	0	0	0	0	0	0	0	0	0
ENSMUSG00000005892_ENSMUSG00000005892_Trh_chr6:92242060-92244650	ENSMUSG00000005892	ENSMUSG00000005892	Trh	chr6:92242060-92244650	protein_coding	0.0703669	0	0	0	0.0636552	0	0	0	0	0	0.0532216	0
ENSMUSG00000005893_ENSMUSG00000005893_Nr2c2_chr6:92091389-92173057	ENSMUSG00000005893	ENSMUSG00000005893	Nr2c2	chr6:92091389-92173057	protein_coding	2.27674	2.55046	2.4464	2.9373	2.84515	2.03539	2.56646	2.50801	2.67522	2.26659	3.07636	2.7109
ENSMUSG00000005897_ENSMUSG00000005897_Nr2c1_chr10:94148022-94197211	ENSMUSG00000005897	ENSMUSG00000005897	Nr2c1	chr10:94148022-94197211	protein_coding	4.00499	4.32116	4.19223	5.15281	4.98504	5.06505	3.5114	4.3867	4.24549	3.72484	3.75937	3.3099
ENSMUSG00000005899_ENSMUSG00000005899_Smpd4_chr16:17619353-17644828	ENSMUSG00000005899	ENSMUSG00000005899	Smpd4	chr16:17619353-17644828	protein_coding	10.0112	7.3714	8.93982	7.19461	10.4043	8.29664	9.05105	8.82468	6.41004	6.41042	5.73186	6.95036
ENSMUSG00000005907_ENSMUSG00000005907_Pex1_chr5:3596065-3637232	ENSMUSG00000005907	ENSMUSG00000005907	Pex1	chr5:3596065-3637232	protein_coding	5.21025	4.81356	5.85721	5.27982	6.24907	6.76625	4.96331	4.13278	5.35887	5.68067	5.22843	4.55596
ENSMUSG00000005917_ENSMUSG00000005917_Otx1_chr11:21994763-22002897	ENSMUSG00000005917	ENSMUSG00000005917	Otx1	chr11:21994763-22002897	protein_coding	0	0	0	0	0	0	0	0	0	0	0	0
ENSMUSG00000005936_ENSMUSG00000005936_Kctd20_chr17:28951949-28969549	ENSMUSG00000005936	ENSMUSG00000005936	Kctd20	chr17:28951949-28969549	protein_coding	19.0564	15.8864	18.4277	20.3994	17.2071	16.0393	20.6241	18.6018	17.4312	17.2554	15.9462	19.1099
ENSMUSG00000005947_ENSMUSG00000005947_Itgae_chr11:73090582-73147446	ENSMUSG00000005947	ENSMUSG00000005947	Itgae	chr11:73090582-73147446	protein_coding	0.478774	0.616857	0.637738	0.570115	0.619974	0.40483	0.208487	0.207341	0.239185	0.200624	0.189917	0.2725
ENSMUSG00000005949_ENSMUSG00000005949_Ctns_chr11:73183595-73199042	ENSMUSG00000005949	ENSMUSG00000005949	Ctns	chr11:73183595-73199042	protein_coding	6.20165	5.83955	5.40557	7.9497	6.67879	6.73845	7.00958	7.82154	7.79514	6.2734	7.33616	6.4534
ENSMUSG00000005950_ENSMUSG00000005950_P2rx5_chr11:73160420-73172685	ENSMUSG00000005950	ENSMUSG00000005950	P2rx5	chr11:73160420-73172685	protein_coding	39.0146	40.6481	39.6352	34.6178	42.8855	40.5929	7.61641	6.65496	6.31767	9.66462	10.7559	12.5035
ENSMUSG00000005951_ENSMUSG00000005951_Shpk_chr11:73199459-73224511	ENSMUSG00000005951	ENSMUSG00000005951	Shpk	chr11:73199459-73224511	protein_coding	7.67116	7.32726	7.64686	7.45774	7.73247	7.86716	2.66725	3.09056	4.1127	2.98298	2.51017	2.63558
ENSMUSG00000005952_ENSMUSG00000005952_Trpv1_chr11:73234291-73261242	ENSMUSG00000005952	ENSMUSG00000005952	Trpv1	chr11:73234291-73261242	protein_coding	0.788439	0.177861	0.496434	0.758279	1.17651	1.47242	0.452113	0.543427	0.803741	0.567165	0.259126	0.556614
ENSMUSG00000005958_ENSMUSG00000005958_Ephb3_chr16:21204754-21223305	ENSMUSG00000005958	ENSMUSG00000005958	Ephb3	chr16:21204754-21223305	protein_coding	0.463678	0.339016	0.306908	0.486365	0.528955	0.146588	0.0922268	0.104243	0.2844	0.309912	0.126337	0.18769
ENSMUSG00000005968_ENSMUSG00000005968_Tuft1_chr3:94612756-94658872	ENSMUSG00000005968	ENSMUSG00000005968	Tuft1	chr3:94612756-94658872	protein_coding	1.14703	0.82371	1.27937	1.0845	0.557505	1.45372	0.216459	0.640373	0.0891858	0.40806	0.454433	0.650673
ENSMUSG00000005973_ENSMUSG00000005973_Rcn1_chr2:105386290-105399319	ENSMUSG00000005973	ENSMUSG00000005973	Rcn1	chr2:105386290-105399319	protein_coding	5.92151	6.65328	5.44295	8.09224	8.40273	7.71452	4.80508	4.63399	5.20927	7.2205	7.46297	7.71178
ENSMUSG00000005980_ENSMUSG00000005980_Dnase1_chr16:4036941-4040024	ENSMUSG00000005980	ENSMUSG00000005980	Dnase1	chr16:4036941-4040024	protein_coding	0.706079	1.00732	1.40693	1.08382	1.79508	2.16042	1.56457	1.5736	1.55003	2.11405	1.95142	1.38093
ENSMUSG00000005981_ENSMUSG00000005981_Trap1_chr16:4039970-4077827	ENSMUSG00000005981	ENSMUSG00000005981	Trap1	chr16:4039970-4077827	protein_coding	146.891	141.499	157.901	165.261	159.531	152.77	132.226	127.648	134.992	145.199	125.841	138.748
ENSMUSG00000005982_ENSMUSG00000005982_Naa60_chr16:3872374-3904770	ENSMUSG00000005982	ENSMUSG00000005982	Naa60	chr16:3872374-3904770	protein_coding	21.8481	19.811	24.0195	20.3934	20.9532	21.7949	22.2901	17.0084	19.5737	21.6259	19.4053	24.2779
ENSMUSG00000005983_ENSMUSG00000005983_1700037C18Rik_chr16:3895178-3908689	ENSMUSG00000005983	ENSMUSG00000005983	1700037C18Rik	chr16:3895178-3908689	protein_coding	2.47189	2.61671	2.2219	2.70011	2.07747	2.68609	2.25098	1.50925	1.92845	2.38946	2.09111	2.00837
ENSMUSG00000005986_ENSMUSG00000005986_Ankrd13d_chr19:4270179-4283137	ENSMUSG00000005986	ENSMUSG00000005986	Ankrd13d	chr19:4270179-4283137	protein_coding	0.709695	0.437159	0.524643	0.551328	0.747344	0.400676	0.33699	0.279172	0.556961	0.206557	0.366296	0.592285
ENSMUSG00000005994_ENSMUSG00000005994_Tyrp1_chr4:80834122-80851719	ENSMUSG00000005994	ENSMUSG00000005994	Tyrp1	chr4:80834122-80851719	protein_coding	0	0	0	0	0	0	0	0.0983208	0	0	0	0
ENSMUSG00000006005_ENSMUSG00000006005_Tpr_chr1:150392837-150449935	ENSMUSG00000006005	ENSMUSG00000006005	Tpr	chr1:150392837-150449935	protein_coding	35.5084	30.3873	35.0688	34.4485	35.8567	30.2871	37.2077	38.6332	38.1416	46.8456	40.2901	46.4119
ENSMUSG00000006007_ENSMUSG00000006007_Pdc_chr1:150319416-150333905	ENSMUSG00000006007	ENSMUSG00000006007	Pdc	chr1:150319416-150333905	protein_coding	0	0	0	0	0	0	0	0	0	0	0	0
ENSMUSG00000006010_ENSMUSG00000006010_BC003331_chr1:150361304-150393080	ENSMUSG00000006010	ENSMUSG00000006010	BC003331	chr1:150361304-150393080	protein_coding	19.4193	15.3305	17.1102	20.0257	15.9219	18.4873	13.7074	14.4139	14.9987	14.8724	12.6504	15.6183
ENSMUSG00000006014_ENSMUSG00000006014_Prg4_chr1:150449411-150466165	ENSMUSG00000006014	ENSMUSG00000006014	Prg4	chr1:150449411-150466165	protein_coding	3.51534	2.98598	3.48101	3.91319	2.89923	2.71446	4.8912	5.46754	6.60489	10.7426	15.128	14.1146
ENSMUSG00000006019_ENSMUSG00000006019_Dhx34_chr7:16197146-16222037	ENSMUSG00000006019	ENSMUSG00000006019	Dhx34	chr7:16197146-16222037	protein_coding	5.51391	4.66076	5.49777	4.98495	5.92236	5.26898	2.52088	1.83918	1.97095	2.07255	2.0129	2.57581
ENSMUSG00000006021_ENSMUSG00000006021_Kptn_chr7:16119894-16127516	ENSMUSG00000006021	ENSMUSG00000006021	Kptn	chr7:16119894-16127516	protein_coding	18.6012	16.0656	19.0972	17.9556	17.2021	17.9675	10.1492	6.45199	7.76676	11.1798	11.4309	12.0076
ENSMUSG00000006024_ENSMUSG00000006024_Napa_chr7:16098457-16117975	ENSMUSG00000006024	ENSMUSG00000006024	Napa	chr7:16098457-16117975	protein_coding	59.3776	56.9343	80.9723	67.5743	73.5356	60.5078	68.6159	70.6783	79.5167	72.6176	63.2931	74.2857
ENSMUSG00000006050_ENSMUSG00000006050_Sra1_chr18:36666680-36671196	ENSMUSG00000006050	ENSMUSG00000006050	Sra1	chr18:36666680-36671196	protein_coding	32.9458	33.3655	34.286	37.7115	35.9729	40.8475	36.4952	36.7001	32.7705	37.4869	34.3518	36.1789
ENSMUSG00000006056_ENSMUSG00000006056_Calcoco2_chr11:96099325-96111964	ENSMUSG00000006056	ENSMUSG00000006056	Calcoco2	chr11:96099325-96111964	protein_coding	0	0	0	0	0	0	0	0	0	0	0.0821359	0
ENSMUSG00000006057_ENSMUSG00000006057_Atp5g1_chr11:96068851-96075670	ENSMUSG00000006057	ENSMUSG00000006057	Atp5g1	chr11:96068851-96075670	protein_coding	13.8784	11.3946	17.9143	16.3961	13.1723	12.4162	14.6349	25.4015	18.6572	16.4521	20.055	18.9534
ENSMUSG00000006058_ENSMUSG00000006058_Snf8_chr11:96034884-96047430	ENSMUSG00000006058	ENSMUSG00000006058	Snf8	chr11:96034884-96047430	protein_coding	32.8999	31.7913	32.8992	35.2951	30.7927	31.3344	31.1721	36.9066	35.3958	33.7353	32.9638	28.0667
ENSMUSG00000006095_ENSMUSG00000006095_Tbcb_chr7:30224130-30232272	ENSMUSG00000006095	ENSMUSG00000006095	Tbcb	chr7:30224130-30232272	protein_coding	21.1605	19.3059	26.6299	23.7299	23.0878	22.4806	18.4789	23.1124	19.9639	31.1381	23.3761	24.4894
ENSMUSG00000006127_ENSMUSG00000006127_Inpp5k_chr11:75630987-75648871	ENSMUSG00000006127	ENSMUSG00000006127	Inpp5k	chr11:75630987-75648871	protein_coding	20.9961	16.2865	23.8713	24.1468	19.4413	22.6054	8.65478	8.77844	6.84375	8.24474	10.9928	6.64772
ENSMUSG00000006134_ENSMUSG00000006134_Crkl_chr16:17451986-17486255	ENSMUSG00000006134	ENSMUSG00000006134	Crkl	chr16:17451986-17486255	protein_coding	5.35133	5.82912	5.53881	6.14204	6.20546	5.48627	8.13892	7.22128	7.97331	7.38659	6.30517	7.3665
ENSMUSG00000006143_ENSMUSG00000006143_Upk3bl_chr5:136054491-136064326	ENSMUSG00000006143	ENSMUSG00000006143	Upk3bl	chr5:136054491-136064326	protein_coding	0	0	0.189723	0	0	0	0.248016	0.17774	0	0.084194	0	0.177161
ENSMUSG00000006154_ENSMUSG00000006154_Eps8l1_chr7:4460673-4479404	ENSMUSG00000006154	ENSMUSG00000006154	Eps8l1	chr7:4460673-4479404	protein_coding	0.17622	0	0.116648	0.148772	0	0.297706	0	0.1836	0	0	0	0
ENSMUSG00000006169_ENSMUSG00000006169_Clint1_chr11:45852050-45910625	ENSMUSG00000006169	ENSMUSG00000006169	Clint1	chr11:45852050-45910625	protein_coding	12.7845	11.9027	13.1685	13.5588	12.4641	10.7942	16.1781	13.2983	15.0337	15.2826	16.1291	16.9249
ENSMUSG00000006179_ENSMUSG00000006179_Prss16_chr13:22002175-22009742	ENSMUSG00000006179	ENSMUSG00000006179	Prss16	chr13:22002175-22009742	protein_coding	0	0	0	0	0	0	0	0	0	0	0	0
ENSMUSG00000006191_ENSMUSG00000006191_Cdkal1_chr13:29191745-29855674	ENSMUSG00000006191	ENSMUSG00000006191	Cdkal1	chr13:29191745-29855674	protein_coding	5.56097	4.1507	4.01539	6.65174	6.41508	6.86239	4.01941	5.43206	3.6246	5.62066	5.08515	5.0913
ENSMUSG00000006200_ENSMUSG00000006200_Rhox6_chrX:37826909-37829857	ENSMUSG00000006200	ENSMUSG00000006200	Rhox6	chrX:37826909-37829857	protein_coding	0	0	0	0	0	0	0	0	0	0	0	0
ENSMUSG00000006204_ENSMUSG00000006204_5430419D17Rik_chr7:131174401-131250945	ENSMUSG00000006204	ENSMUSG00000006204	5430419D17Rik	chr7:131174401-131250945	protein_coding	0	0	0	0.0507696	0	0	0	0	0	0	0	0
ENSMUSG00000006205_ENSMUSG00000006205_Htra1_chr7:130936110-130985660	ENSMUSG00000006205	ENSMUSG00000006205	Htra1	chr7:130936110-130985660	protein_coding	25.5262	26.0486	29.3447	30.7191	32.5225	26.8766	20.6508	17.9105	19.4666	20.6779	22.2663	17.4812
ENSMUSG00000006215_ENSMUSG00000006215_Zbtb17_chr4:141444653-141467930	ENSMUSG00000006215	ENSMUSG00000006215	Zbtb17	chr4:141444653-141467930	protein_coding	5.26619	4.09858	5.03432	4.92023	5.54361	5.19393	5.51495	7.18407	5.62607	6.56233	6.35265	7.00118
ENSMUSG00000006216_ENSMUSG00000006216_Clcnkb_chr4:141404352-141416014	ENSMUSG00000006216	ENSMUSG00000006216	Clcnkb	chr4:141404352-141416014	protein_coding	0	0.0324052	0	0.0319177	0.104095	0	0	0	0	0	0	0
ENSMUSG00000006218_ENSMUSG00000006218_Fam131c_chr4:141368219-141384175	ENSMUSG00000006218	ENSMUSG00000006218	Fam131c	chr4:141368219-141384175	protein_coding	0.608024	0.457486	0.642597	1.06888	0.611207	1.25681	0.616265	1.02081	0.849437	0.593655	0.459924	0.7403
ENSMUSG00000006219_ENSMUSG00000006219_Fblim1_chr4:141576061-141606096	ENSMUSG00000006219	ENSMUSG00000006219	Fblim1	chr4:141576061-141606096	protein_coding	3.23487	2.56204	3.1319	3.12525	3.98921	3.95873	3.77553	3.559	3.06448	9.30146	9.99327	8.52529
ENSMUSG00000006221_ENSMUSG00000006221_Hspb7_chr4:141420778-141425311	ENSMUSG00000006221	ENSMUSG00000006221	Hspb7	chr4:141420778-141425311	protein_coding	0.67938	1.39552	1.52169	1.53662	0.791265	0.602054	6.6897	8.72605	6.68709	4.81422	6.93436	5.7704
ENSMUSG00000006235_ENSMUSG00000006235_Epor_chr9:21958898-21963576	ENSMUSG00000006235	ENSMUSG00000006235	Epor	chr9:21958898-21963576	protein_coding	1.83892	1.59924	1.59893	2.04239	2.31206	1.90087	0.394708	0.772867	0.374898	0.653357	0.773246	0.712496
ENSMUSG00000006241_ENSMUSG00000006241_Ccdc159_chr9:21927470-21935872	ENSMUSG00000006241	ENSMUSG00000006241	Ccdc159	chr9:21927470-21935872	protein_coding	3.30642	3.27942	2.97044	3.22586	3.45336	3.16866	0.702642	1.00877	0.978813	1.14976	0.662669	0.685599
ENSMUSG00000006262_ENSMUSG00000006262_Mob1b_chr5:88720854-88762058	ENSMUSG00000006262	ENSMUSG00000006262	Mob1b	chr5:88720854-88762058	protein_coding	5.93909	7.33658	6.07517	5.43478	6.42936	5.80147	17.6954	17.8548	20.3868	10.6547	12.3125	10.2568
ENSMUSG00000006269_ENSMUSG00000006269_Atp6v1b1_chr6:83743016-83758809	ENSMUSG00000006269	ENSMUSG00000006269	Atp6v1b1	chr6:83743016-83758809	protein_coding	0	0	0	0	0	0	0	0	0	0	0	0
ENSMUSG00000006270_ENSMUSG00000006270_Vax1_chr19:59166186-59170978	ENSMUSG00000006270	ENSMUSG00000006270	Vax1	chr19:59166186-59170978	protein_coding	0	0.0398559	0	0	0.0852985	0.119524	0	0	0	0	0	0.046934
ENSMUSG00000006273_ENSMUSG00000006273_Atp6v1b2_chr8:69088645-69113711	ENSMUSG00000006273	ENSMUSG00000006273	Atp6v1b2	chr8:69088645-69113711	protein_coding	25.9361	25.7844	27.5487	27.562	26.4351	26.9448	33.6749	32.1714	32.9702	37.1866	37.8316	38.0915
ENSMUSG00000006276_ENSMUSG00000006276_Eps15l1_chr8:72341000-72421474	ENSMUSG00000006276	ENSMUSG00000006276	Eps15l1	chr8:72341000-72421474	protein_coding	9.94467	9.05566	11.5021	12.1958	9.57301	9.28487	8.20886	8.07963	7.67884	9.75494	10.0372	10.135
ENSMUSG00000006281_ENSMUSG00000006281_Tep1_chr14:50824061-50870560	ENSMUSG00000006281	ENSMUSG00000006281	Tep1	chr14:50824061-50870560	protein_coding	7.91603	7.52875	8.00456	7.9451	8.10199	7.74634	4.65143	4.39559	4.48469	5.32996	4.80826	5.47068
ENSMUSG00000006288_ENSMUSG00000006288_Ttc5_chr14:50765414-50785518	ENSMUSG00000006288	ENSMUSG00000006288	Ttc5	chr14:50765414-50785518	protein_coding	8.56937	9.22462	7.5222	8.61655	8.90511	8.57695	5.27179	6.90498	6.27344	7.25592	7.10015	6.21388
ENSMUSG00000006289_ENSMUSG00000006289_Osgep_chr14:50906477-50924893	ENSMUSG00000006289	ENSMUSG00000006289	Osgep	chr14:50906477-50924893	protein_coding	53.2392	54.4138	64.1782	61.5721	66.7935	63.8599	35.6436	36.5356	35.0664	43.5017	34.6875	40.2282
ENSMUSG00000006299_ENSMUSG00000006299_Aamp_chr1:74279839-74284738	ENSMUSG00000006299	ENSMUSG00000006299	Aamp	chr1:74279839-74284738	protein_coding	42.55	48.9394	54.9304	49.2875	52.6801	51.221	66.1824	68.0902	70.4543	54.3554	54.523	53.1625
ENSMUSG00000006301_ENSMUSG00000006301_Tmbim1_chr1:74288246-74305622	ENSMUSG00000006301	ENSMUSG00000006301	Tmbim1	chr1:74288246-74305622	protein_coding	28.2667	24.8869	30.1152	33.6387	30.9815	27.419	28.7398	27.6354	26.4799	29.9312	38.3408	37.6161
ENSMUSG00000006304_ENSMUSG00000006304_Arpc2_chr1:74236496-74268209	ENSMUSG00000006304	ENSMUSG00000006304	Arpc2	chr1:74236496-74268209	protein_coding	60.4456	60.7895	62.8065	65.0713	59.9467	60.1619	77.7764	72.7178	74.4795	84.5539	86.9439	88.7664
ENSMUSG00000006307_ENSMUSG00000006307_Wbp7_chr7:30568857-30588726	ENSMUSG00000006307	ENSMUSG00000006307	Wbp7	chr7:30568857-30588726	protein_coding	8.25272	9.34877	8.74321	11.4902	11.7061	8.24935	8.81616	8.59147	9.53308	10.1202	8.62767	10.0652
ENSMUSG00000006310_ENSMUSG00000006310_Zbtb32_chr7:30589680-30598909	ENSMUSG00000006310	ENSMUSG00000006310	Zbtb32	chr7:30589680-30598909	protein_coding	0.382751	0.134142	0.251644	0.440126	0.584776	0.536246	0.0371127	0.319737	0.265544	0.376747	0.119981	0.315856
ENSMUSG00000006311_ENSMUSG00000006311_Etv2_chr7:30633615-30635852	ENSMUSG00000006311	ENSMUSG00000006311	Etv2	chr7:30633615-30635852	protein_coding	0	0	0	0	0	0	0	0	0	0	0	0
ENSMUSG00000006313_ENSMUSG00000006313_Upk1a_chr7:30603091-30612734	ENSMUSG00000006313	ENSMUSG00000006313	Upk1a	chr7:30603091-30612734	protein_coding	0.0752169	0.127359	0.357462	0.563625	0.476214	0.254396	0.316513	0.151443	0.315149	0.360402	0.398159	0.374624
ENSMUSG00000006315_ENSMUSG00000006315_Tmem147_chr7:30727700-30729534	ENSMUSG00000006315	ENSMUSG00000006315	Tmem147	chr7:30727700-30729534	protein_coding	55.5716	59.2984	64.6991	57.0504	62.6013	62.4084	87.3138	86.3401	92.7682	90.6621	84.8388	85.3682
ENSMUSG00000006333_ENSMUSG00000006333_Rps9_chr7:3703992-3706901	ENSMUSG00000006333	ENSMUSG00000006333	Rps9	chr7:3703992-3706901	protein_coding	401.82	362.36	434.921	472.725	443.689	435.205	419.924	446.09	413.781	484.648	481.008	488.333
ENSMUSG00000006335_ENSMUSG00000006335_Tfpt_chr7:3620323-3629929	ENSMUSG00000006335	ENSMUSG00000006335	Tfpt	chr7:3620323-3629929	protein_coding	9.30849	9.08547	12.3603	10.0809	11.2686	8.84547	16.4108	15.3084	16.2725	13.4497	13.7137	14.6218
ENSMUSG00000006342_ENSMUSG00000006342_Susd2_chr10:75636618-75644008	ENSMUSG00000006342	ENSMUSG00000006342	Susd2	chr10:75636618-75644008	protein_coding	0.489525	0.3684	0.686282	0.567978	0.586961	0.521688	0.478374	0.440168	0.581832	0.469441	0.420985	0.339122
ENSMUSG00000006344_ENSMUSG00000006344_Ggt5_chr10:75589380-75616968	ENSMUSG00000006344	ENSMUSG00000006344	Ggt5	chr10:75589380-75616968	protein_coding	1.75087	1.42703	1.64109	2.10985	2.0264	1.92739	0.92058	0.789203	0.996462	0.962457	1.16683	1.03008
ENSMUSG00000006345_ENSMUSG00000006345_Ggt1_chr10:75561603-75586200	ENSMUSG00000006345	ENSMUSG00000006345	Ggt1	chr10:75561603-75586200	protein_coding	0	0	0	0.112202	0	0	0	0	0	0	0	0
ENSMUSG00000006356_ENSMUSG00000006356_Crip2_chr12:113140235-113145504	ENSMUSG00000006356	ENSMUSG00000006356	Crip2	chr12:113140235-113145504	protein_coding	49.5951	33.8008	63.3203	49.682	48.9818	28.2434	30.2884	29.1008	25.33	73.5363	82.2634	80.0954
ENSMUSG00000006360_ENSMUSG00000006360_Crip1_chr12:113152011-113153877	ENSMUSG00000006360	ENSMUSG00000006360	Crip1	chr12:113152011-113153877	protein_coding	68.3471	68.4954	78.4405	84.3524	83.8035	75.1103	105.653	131.016	104.159	100.06	130.601	110.159
ENSMUSG00000006369_ENSMUSG00000006369_Fbln1_chr15:85205948-85286535	ENSMUSG00000006369	ENSMUSG00000006369	Fbln1	chr15:85205948-85286535	protein_coding	4.5044	4.17431	7.18674	5.81983	5.81973	5.9951	4.21349	3.89276	3.42472	3.35663	3.75827	3.64649
ENSMUSG00000006373_ENSMUSG00000006373_Pgrmc1_chrX:36598205-36606079	ENSMUSG00000006373	ENSMUSG00000006373	Pgrmc1	chrX:36598205-36606079	protein_coding	40.9253	45.2084	42.3743	42.3312	42.8676	44.1258	38.5217	38.9533	37.7506	36.3705	33.7132	32.5196
ENSMUSG00000006378_ENSMUSG00000006378_Gcat_chr15:79030873-79043558	ENSMUSG00000006378	ENSMUSG00000006378	Gcat	chr15:79030873-79043558	protein_coding	4.15808	3.99995	5.04681	5.31001	5.71124	5.62411	3.97162	3.60763	4.52951	4.09454	4.31507	3.5094
ENSMUSG00000006386_ENSMUSG00000006386_Tek_chr4:94739288-94874976	ENSMUSG00000006386	ENSMUSG00000006386	Tek	chr4:94739288-94874976	protein_coding	13.0308	12.9981	14.1557	15.9188	13.6957	12.6788	7.38958	9.72802	10.2789	10.2559	11.7016	9.6207
ENSMUSG00000006389_ENSMUSG00000006389_Mpl_chr4:118442414-118457513	ENSMUSG00000006389	ENSMUSG00000006389	Mpl	chr4:118442414-118457513	protein_coding	0	0	0	0	0.0275158	0	0	0.0306881	0	0.0443195	0.0419602	0
ENSMUSG00000006390_ENSMUSG00000006390_Elovl1_chr4:118428092-118432953	ENSMUSG00000006390	ENSMUSG00000006390	Elovl1	chr4:118428092-118432953	protein_coding	9.74297	9.32467	9.99291	12.4002	12.1792	9.55895	12.9179	11.9424	13.1259	15.9021	18.3947	17.0504
ENSMUSG00000006392_ENSMUSG00000006392_Med8_chr4:118409336-118415782	ENSMUSG00000006392	ENSMUSG00000006392	Med8	chr4:118409336-118415782	protein_coding	12.1623	17.0523	13.8305	13.643	17.3438	16.1258	24.719	24.1466	21.6834	20.052	21.1438	24.9366
ENSMUSG00000006395_ENSMUSG00000006395_Hyi_chr4:118359989-118362744	ENSMUSG00000006395	ENSMUSG00000006395	Hyi	chr4:118359989-118362744	protein_coding	9.32465	8.25443	8.49224	6.62406	8.22443	7.80076	4.67493	4.0167	4.89268	6.37151	7.00389	5.92918
ENSMUSG00000006398_ENSMUSG00000006398_Cdc20_chr4:118432900-118437352	ENSMUSG00000006398	ENSMUSG00000006398	Cdc20	chr4:118432900-118437352	protein_coding	0.679112	0.309427	0.550925	0.609884	0.662323	0.485987	0.146773	0.523722	0.0547688	0.45936	0.553522	0.676599
ENSMUSG00000006403_ENSMUSG00000006403_Adamts4_chr1:171250420-171260637	ENSMUSG00000006403	ENSMUSG00000006403	Adamts4	chr1:171250420-171260637	protein_coding	0.118989	0.167698	0.320177	0.380209	0.395403	0.329341	2.49881	1.60433	1.56142	3.62118	8.76523	9.41758
ENSMUSG00000006411_ENSMUSG00000006411_Pvrl4_chr1:171370098-171388598	ENSMUSG00000006411	ENSMUSG00000006411	Pvrl4	chr1:171370098-171388598	protein_coding	0.0830385	0.16312	0.0566318	0.113694	0.150488	0.140523	0.116859	0.139877	0.0871443	0.0655034	0.0826791	0.0275684
ENSMUSG00000006412_ENSMUSG00000006412_Pfdn2_chr1:171345669-171359254	ENSMUSG00000006412	ENSMUSG00000006412	Pfdn2	chr1:171345669-171359254	protein_coding	61.6033	55.0829	65.9909	67.3031	67.1178	63.2458	79.4855	70.0846	77.0531	92.6361	69.6889	87.094
ENSMUSG00000006418_ENSMUSG00000006418_Rnf114_chr2:167492644-167516173	ENSMUSG00000006418	ENSMUSG00000006418	Rnf114	chr2:167492644-167516173	protein_coding	15.9056	15.9383	21.5006	20.3842	20.2569	21.0457	10.5254	10.3644	9.9724	14.2148	11.2931	13.8348
ENSMUSG00000006423_ENSMUSG00000006423_C330007P06Rik_chrX:36823736-36874111	ENSMUSG00000006423	ENSMUSG00000006423	C330007P06Rik	chrX:36823736-36874111	protein_coding	21.8146	21.6693	19.0583	21.1081	18.4592	23.0002	23.1116	27.0029	23.816	21.458	21.7648	21.3684
ENSMUSG00000006435_ENSMUSG00000006435_Neurl1a_chr19:47178819-47259440	ENSMUSG00000006435	ENSMUSG00000006435	Neurl1a	chr19:47178819-47259440	protein_coding	0.310391	0.504773	0.960875	0.795967	0.893141	0.626157	0.504079	1.01374	0.551329	0.343965	0.361791	0.428278
ENSMUSG00000006442_ENSMUSG00000006442_Srm_chr4:148591502-148594993	ENSMUSG00000006442	ENSMUSG00000006442	Srm	chr4:148591502-148594993	protein_coding	11.4963	8.61661	14.5362	11.716	12.3718	9.90876	17.4657	17.0449	13.984	29.7122	29.301	34.6389
ENSMUSG00000006445_ENSMUSG00000006445_Epha2_chr4:141301239-141329384	ENSMUSG00000006445	ENSMUSG00000006445	Epha2	chr4:141301239-141329384	protein_coding	0.894784	0.624231	1.29739	2.00986	1.64195	1.34429	3.47938	3.07581	2.18366	5.49553	5.44621	7.30631
ENSMUSG00000006456_ENSMUSG00000006456_Rbm14_chr19:4800568-4811634	ENSMUSG00000006456	ENSMUSG00000006456	Rbm14	chr19:4800568-4811634	protein_coding	9.07184	11.8502	9.99402	11.2525	10.1742	6.7916	6.63826	6.26421	7.46765	7.67864	5.59404	6.88648
ENSMUSG00000006457_ENSMUSG00000006457_Actn3_chr19:4861222-4877909	ENSMUSG00000006457	ENSMUSG00000006457	Actn3	chr19:4861222-4877909	protein_coding	6.21263	12.2898	22.2403	32.0159	24.8046	12.0662	22.9679	45.8973	26.2254	13.7448	16.6604	14.8317
ENSMUSG00000006462_ENSMUSG00000006462_A530013C23Rik_chr2:167691176-167729172	ENSMUSG00000006462	ENSMUSG00000006462	A530013C23Rik	chr2:167691176-167729172		0.705958	0.716574	0.835111	1.07987	0.785838	0.759318	0.173751	0.249549	0.296255	0.359054	0.29405	0.211033
ENSMUSG00000006463_ENSMUSG00000006463_Zdhhc24_chr19:4878667-4885397	ENSMUSG00000006463	ENSMUSG00000006463	Zdhhc24	chr19:4878667-4885397	protein_coding	4.14107	4.43907	4.31997	4.25725	5.12335	3.82265	1.65445	1.90562	1.77751	2.29343	2.57368	2.22863
ENSMUSG00000006464_ENSMUSG00000006464_Bbs1_chr19:4886897-4906627	ENSMUSG00000006464	ENSMUSG00000006464	Bbs1	chr19:4886897-4906627	protein_coding	0.925703	1.03052	1.0745	1.13174	1.10479	0.965928	1.36883	1.60756	1.18253	1.4576	1.41482	1.46071
ENSMUSG00000006469_ENSMUSG00000006469_Slc34a3_chr2:25228897-25234364	ENSMUSG00000006469	ENSMUSG00000006469	Slc34a3	chr2:25228897-25234364	protein_coding	0	0	0	0	0	0	0	0	0	0	0	0
ENSMUSG00000006471_ENSMUSG00000006471_Ndor1_chr2:25244820-25256022	ENSMUSG00000006471	ENSMUSG00000006471	Ndor1	chr2:25244820-25256022	protein_coding	6.27756	6.09939	7.68092	8.28224	5.59449	7.13492	6.08188	6.80013	6.27832	7.00671	8.53437	8.86855
ENSMUSG00000006476_ENSMUSG00000006476_Nsmf_chr2:25054354-25062881	ENSMUSG00000006476	ENSMUSG00000006476	Nsmf	chr2:25054354-25062881	protein_coding	11.7377	12.776	14.6405	16.353	14.0404	13.1016	10.2183	7.93596	8.78305	13.059	12.887	12.8918
ENSMUSG00000006488_ENSMUSG00000006488_Prl7a1_chr13:27633379-27642474	ENSMUSG00000006488	ENSMUSG00000006488	Prl7a1	chr13:27633379-27642474	protein_coding	0	0	0	0	0	0	0	0	0	0	0	0
ENSMUSG00000006490_ENSMUSG00000006490_Prl8a9_chr13:27558008-27564604	ENSMUSG00000006490	ENSMUSG00000006490	Prl8a9	chr13:27558008-27564604	protein_coding	0	0	0	0	0	0	0	0	0	0	0	0
ENSMUSG00000006494_ENSMUSG00000006494_Pdk1_chr2:71873223-71903858	ENSMUSG00000006494	ENSMUSG00000006494	Pdk1	chr2:71873223-71903858	protein_coding	23.5881	27.9665	24.9031	22.529	20.2306	23.205	9.60018	11.3299	13.6103	9.65824	9.77898	9.65423
ENSMUSG00000006498_ENSMUSG00000006498_Ptbp1_chr10:79854426-79864771	ENSMUSG00000006498	ENSMUSG00000006498	Ptbp1	chr10:79854426-79864771	protein_coding	39.332	38.1532	46.3368	44.2888	48.4309	39.0256	45.2286	39.267	43.4217	50.3267	59.0777	56.0721
ENSMUSG00000006522_ENSMUSG00000006522_Itih3_chr14:30908572-30923760	ENSMUSG00000006522	ENSMUSG00000006522	Itih3	chr14:30908572-30923760	protein_coding	0.167455	0.067952	0.224655	0.0729374	0.118822	0.148859	0.226551	0.108277	0.0459089	0.14078	0.243476	0.108311
ENSMUSG00000006526_ENSMUSG00000006526_Tmem110_chr14:30825589-30876986	ENSMUSG00000006526	ENSMUSG00000006526	Tmem110	chr14:30825589-30876986	protein_coding	18.032	19.2063	20.5791	16.5149	18.8416	19.2246	30.8102	30.2921	33.1698	23.5564	21.6122	25.7548
ENSMUSG00000006527_ENSMUSG00000006527_Sfmbt1_chr14:30714848-30822713	ENSMUSG00000006527	ENSMUSG00000006527	Sfmbt1	chr14:30714848-30822713	protein_coding	5.00155	3.2852	3.50881	4.5347	4.14864	4.48454	5.99975	6.08725	5.6428	6.93396	7.12589	8.57612
ENSMUSG00000006529_ENSMUSG00000006529_Itih1_chr14:30929179-30943289	ENSMUSG00000006529	ENSMUSG00000006529	Itih1	chr14:30929179-30943289	protein_coding	0	0	0	0.0240684	0	0.0244318	0	0	0	0	0.0218777	0
ENSMUSG00000006538_ENSMUSG00000006538_Ihh_chr1:74945318-74951651	ENSMUSG00000006538	ENSMUSG00000006538	Ihh	chr1:74945318-74951651	protein_coding	0.0370647	0.0627058	0.0505102	0.0308829	0.0335699	0.0313516	0.0521218	0.0374289	0.0388827	0.0296477	0	0.036932
ENSMUSG00000006542_ENSMUSG00000006542_Prkag3_chr1:74739498-74749221	ENSMUSG00000006542	ENSMUSG00000006542	Prkag3	chr1:74739498-74749221	protein_coding	0.283343	0.225187	0.529318	0.779516	0.774108	0.27315	0.615396	0.44937	0.616049	0.243171	0.183834	0.161274
ENSMUSG00000006546_ENSMUSG00000006546_Cryba2_chr1:74889933-74893143	ENSMUSG00000006546	ENSMUSG00000006546	Cryba2	chr1:74889933-74893143	protein_coding	0	0	0	0	0	0	0	0	0	0	0	0
ENSMUSG00000006567_ENSMUSG00000006567_Atp7b_chr8:21992784-22060305	ENSMUSG00000006567	ENSMUSG00000006567	Atp7b	chr8:21992784-22060305	protein_coding	0	0.0111307	0.00899109	0	0.0588987	0.0548173	0.00927168	0.0133206	0.0226794	0.0105417	0.0199584	0.0131209
ENSMUSG00000006570_ENSMUSG00000006570_Defb2_chr8:21839925-21843482	ENSMUSG00000006570	ENSMUSG00000006570	Defb2	chr8:21839925-21843482	protein_coding	0	0	0	0	0	0	0	0	0	0	0	0
ENSMUSG00000006574_ENSMUSG00000006574_Slc4a1_chr11:102348823-102366203	ENSMUSG00000006574	ENSMUSG00000006574	Slc4a1	chr11:102348823-102366203	protein_coding	0.095558	0.42919	1.04645	0.41996	0.830629	0.430061	0.0807233	0.283245	0.0601899	0.0458971	0.0868932	0.0952299
ENSMUSG00000006575_ENSMUSG00000006575_Rundc3a_chr11:102393402-102402555	ENSMUSG00000006575	ENSMUSG00000006575	Rundc3a	chr11:102393402-102402555	protein_coding	0.720974	0.755188	1.17687	0.455895	1.12136	0.922604	2.30158	2.35062	3.4314	1.30815	0.993887	0.395214
ENSMUSG00000006576_ENSMUSG00000006576_Slc4a3_chr1:75546265-75562172	ENSMUSG00000006576	ENSMUSG00000006576	Slc4a3	chr1:75546265-75562172	protein_coding	1.96439	2.07812	1.91412	2.25935	3.1513	2.11781	0.698976	1.27689	0.753438	1.88048	1.62012	1.61364
ENSMUSG00000006586_ENSMUSG00000006586_Runx1t1_chr4:13743435-13893649	ENSMUSG00000006586	ENSMUSG00000006586	Runx1t1	chr4:13743435-13893649	protein_coding	0.420085	0.674192	0.397609	0.967463	0.296552	0.703802	0.262988	0.805759	0.164022	0.185574	0.117537	0.0388584
ENSMUSG00000006599_ENSMUSG00000006599_Gtf2h1_chr7:46796102-46823800	ENSMUSG00000006599	ENSMUSG00000006599	Gtf2h1	chr7:46796102-46823800	protein_coding	10.8221	10.6368	9.02808	9.94225	9.6357	11.5396	22.4576	21.1582	23.2872	15.6574	20.0787	19.7852
ENSMUSG00000006611_ENSMUSG00000006611_Hfe_chr13:23702033-23710854	ENSMUSG00000006611	ENSMUSG00000006611	Hfe	chr13:23702033-23710854	protein_coding	6.09914	5.80631	6.36333	9.06899	8.31061	8.66285	3.12471	3.53449	2.56289	5.72277	5.1739	6.89879
ENSMUSG00000006638_ENSMUSG00000006638_Abhd1_chr5:30950065-30955091	ENSMUSG00000006638	ENSMUSG00000006638	Abhd1	chr5:30950065-30955091		8.10104	7.71522	8.25215	6.86569	9.6832	8.74595	12.0756	13.1828	14.6999	11.8427	9.46363	9.87106
ENSMUSG00000006641_ENSMUSG00000006641_Slc5a6_chr5:31036035-31048924	ENSMUSG00000006641	ENSMUSG00000006641	Slc5a6	chr5:31036035-31048924	protein_coding	41.6477	41.7161	42.6598	45.8469	45.2508	57.3625	21.3519	17.3144	25.2634	22.2693	14.2007	17.8046
ENSMUSG00000006642_ENSMUSG00000006642_Tcf23_chr5:30968676-30977018	ENSMUSG00000006642	ENSMUSG00000006642	Tcf23	chr5:30968676-30977018	protein_coding	0.0851593	0.126019	0.159811	0.0177445	0.135054	0.0540332	0.104896	0.129159	0.178784	0.187452	0.161315	0.190947
ENSMUSG00000006649_ENSMUSG00000006649_Nphs1_chr7:30458314-30487223	ENSMUSG00000006649	ENSMUSG00000006649	Nphs1	chr7:30458314-30487223	protein_coding	0	0	0	0	0	0	0	0	0	0	0	0
ENSMUSG00000006651_ENSMUSG00000006651_Aplp1_chr7:30434980-30445582	ENSMUSG00000006651	ENSMUSG00000006651	Aplp1	chr7:30434980-30445582	protein_coding	0.455358	0.353094	0.413661	0.505873	0.82482	0.417264	0.42687	0.34485	0.517483	0.667743	0.948249	0.983072
ENSMUSG00000006673_ENSMUSG00000006673_Qrich1_chr9:108517086-108560167	ENSMUSG00000006673	ENSMUSG00000006673	Qrich1	chr9:108517086-108560167	protein_coding	18.4498	16.4902	18.1273	19.7824	17.0864	16.4941	21.044	19.9547	19.9583	20.3651	20.0747	20.8571
ENSMUSG00000006675_ENSMUSG00000006675_P4htm_chr9:108578825-108597600	ENSMUSG00000006675	ENSMUSG00000006675	P4htm	chr9:108578825-108597600	protein_coding	1.34383	1.04964	1.09023	1.50686	0.842179	0.917969	0.435671	0.417056	0.487707	0.74371	0.625907	0.360464
ENSMUSG00000006676_ENSMUSG00000006676_Usp19_chr9:108490675-108502333	ENSMUSG00000006676	ENSMUSG00000006676	Usp19	chr9:108490675-108502333	protein_coding	24.3993	21.8252	25.9504	26.1408	25.0194	23.6045	37.5402	38.17	37.2349	41.5763	39.635	39.5042
ENSMUSG00000006678_ENSMUSG00000006678_Pola1_chrX:93304766-93632155	ENSMUSG00000006678	ENSMUSG00000006678	Pola1	chrX:93304766-93632155	protein_coding	2.0964	1.64269	1.94455	1.72512	1.59998	2.069	1.09617	0.93963	0.466	0.982797	1.14505	1.71986
ENSMUSG00000006699_ENSMUSG00000006699_Cdc42_chr4:137319695-137357720	ENSMUSG00000006699	ENSMUSG00000006699	Cdc42	chr4:137319695-137357720	protein_coding	124.291	122.234	111.111	117.262	117.209	113.418	108.641	106.23	107.169	97.7121	102.718	103.668
ENSMUSG00000006705_ENSMUSG00000006705_Pknox1_chr17:31564748-31607680	ENSMUSG00000006705	ENSMUSG00000006705	Pknox1	chr17:31564748-31607680	protein_coding	2.5643	2.26627	2.142	2.56201	2.47002	2.16263	5.61064	4.85777	4.73099	4.33858	4.82839	4.82507
ENSMUSG00000006711_ENSMUSG00000006711_D130043K22Rik_chr13:24845134-24901270	ENSMUSG00000006711	ENSMUSG00000006711	D130043K22Rik	chr13:24845134-24901270	protein_coding	0	0	0.012246	0	0.0325245	0	0	0	0	0	0.0135949	0.0178787
ENSMUSG00000006715_ENSMUSG00000006715_Gmnn_chr13:24751844-24761923	ENSMUSG00000006715	ENSMUSG00000006715	Gmnn	chr13:24751844-24761923	protein_coding	40.2897	42.6157	33.3034	40.8898	35.3084	44.2461	7.88216	5.51084	6.70417	6.44208	6.95978	6.04723
ENSMUSG00000006717_ENSMUSG00000006717_Acot13_chr13:24817947-24831517	ENSMUSG00000006717	ENSMUSG00000006717	Acot13	chr13:24817947-24831517	protein_coding	178.374	158.529	181.977	178.479	151.841	160.479	107.566	103.4	108.636	124.649	106.7	113.996
ENSMUSG00000006720_ENSMUSG00000006720_Zfp184_chr13:21945093-21960779	ENSMUSG00000006720	ENSMUSG00000006720	Zfp184	chr13:21945093-21960779	protein_coding	0.12387	0.0349293	0.229568	0.160502	0	0.166117	0.0467036	0	0.0433069	0.115517	0.126462	0.0276167
ENSMUSG00000006724_ENSMUSG00000006724_Cyp27b1_chr10:127048249-127053006	ENSMUSG00000006724	ENSMUSG00000006724	Cyp27b1	chr10:127048249-127053006	protein_coding	0	0.0322511	0.181948	0.226397	0	0	0	0	0.0399935	0.0610008	0.0288695	0
ENSMUSG00000006728_ENSMUSG00000006728_Cdk4_chr10:127063533-127067920	ENSMUSG00000006728	ENSMUSG00000006728	Cdk4	chr10:127063533-127067920	protein_coding	54.6834	33.1193	52.303	49.6798	48.0982	45.9728	51.3176	45.584	37.5703	61.3304	52.9978	64.1171
ENSMUSG00000006731_ENSMUSG00000006731_B4galnt1_chr10:127165155-127172340	ENSMUSG00000006731	ENSMUSG00000006731	B4galnt1	chr10:127165155-127172340	protein_coding	0.80428	0.587558	0.971537	0.913835	0.894019	0.74216	0.745464	0.553784	0.997156	1.31595	1.52267	1.23854
ENSMUSG00000006732_ENSMUSG00000006732_Mettl1_chr10:127041413-127046365	ENSMUSG00000006732	ENSMUSG00000006732	Mettl1	chr10:127041413-127046365	protein_coding	2.47281	2.47527	3.82697	4.06776	3.45167	2.98331	5.33581	6.28333	4.28337	8.63799	8.98376	9.6208
ENSMUSG00000006736_ENSMUSG00000006736_Tspan31_chr10:127067316-127070261	ENSMUSG00000006736	ENSMUSG00000006736	Tspan31	chr10:127067316-127070261	protein_coding	35.1204	31.9749	33.1181	32.1989	32.4086	35.9067	34.5998	34.4975	36.7385	35.7967	34.8044	37.1307
ENSMUSG00000006740_ENSMUSG00000006740_Kif5b_chr18:6201001-6242174	ENSMUSG00000006740	ENSMUSG00000006740	Kif5b	chr18:6201001-6242174	protein_coding	14.4762	14.4783	15.6462	14.4144	15.1479	12.6255	25.6169	24.4143	23.6659	21.0176	23.5947	24.1376
ENSMUSG00000006763_ENSMUSG00000006763_Saal1_chr7:46686107-46710680	ENSMUSG00000006763	ENSMUSG00000006763	Saal1	chr7:46686107-46710680	protein_coding	2.11856	2.00658	2.49658	1.64303	2.21497	2.24006	1.71754	1.64865	1.34407	2.12874	1.50442	1.98573
ENSMUSG00000006764_ENSMUSG00000006764_Tph2_chr10:115078640-115185022	ENSMUSG00000006764	ENSMUSG00000006764	Tph2	chr10:115078640-115185022	protein_coding	0	0	0	0.0285497	0	0.0579644	0.0963809	0.0346071	0.0359472	0.082229	0	0.0341408
ENSMUSG00000006777_ENSMUSG00000006777_Krt23_chr11:99477973-99493137	ENSMUSG00000006777	ENSMUSG00000006777	Krt23	chr11:99477973-99493137	protein_coding	0.0609994	0.0516264	0	0	0	0.10317	0.171286	0	0.127862	0.0487429	0.230762	0.243078
ENSMUSG00000006782_ENSMUSG00000006782_Cnp_chr11:100574903-100591729	ENSMUSG00000006782	ENSMUSG00000006782	Cnp	chr11:100574903-100591729	protein_coding	7.28526	5.18932	7.63602	5.62815	7.17818	6.82767	2.36688	2.45197	2.35415	4.14191	3.30225	2.51215
ENSMUSG00000006784_ENSMUSG00000006784_Ttc25_chr11:100545606-100572568	ENSMUSG00000006784	ENSMUSG00000006784	Ttc25	chr11:100545606-100572568	protein_coding	2.76426	4.2156	3.22516	1.60893	3.63102	3.23996	0.746137	0.340641	0.752663	0.195653	0.127328	0.0812311
ENSMUSG00000006800_ENSMUSG00000006800_Sulf2_chr2:166073088-166155663	ENSMUSG00000006800	ENSMUSG00000006800	Sulf2	chr2:166073088-166155663	protein_coding	24.0042	20.3119	25.9092	26.7376	26.6247	21.4188	12.9121	10.4141	11.4794	13.8622	12.3943	11.1487
ENSMUSG00000006818_ENSMUSG00000006818_Sod2_chr17:13007838-13018119	ENSMUSG00000006818	ENSMUSG00000006818	Sod2	chr17:13007838-13018119	protein_coding	156.666	161.409	153.486	165.186	164.616	164.995	232.52	230.96	229.566	185.461	186.822	192.348
ENSMUSG00000006850_ENSMUSG00000006850_Tmco6_chr18:36735067-36742391	ENSMUSG00000006850	ENSMUSG00000006850	Tmco6	chr18:36735067-36742391	protein_coding	4.73445	4.57221	4.97239	3.77224	5.03117	4.5264	0.90372	1.14194	0.971187	1.60439	1.83063	1.7945
ENSMUSG00000006906_ENSMUSG00000006906_Stambp_chr6:83543205-83572504	ENSMUSG00000006906	ENSMUSG00000006906	Stambp	chr6:83543205-83572504	protein_coding	6.33194	6.36346	7.37999	6.97473	6.65735	7.00908	2.62848	2.83106	2.89712	2.95665	2.76703	2.96396
ENSMUSG00000006920_ENSMUSG00000006920_Ezh1_chr11:101191114-101226463	ENSMUSG00000006920	ENSMUSG00000006920	Ezh1	chr11:101191114-101226463	protein_coding	22.7657	20.4018	25.3705	23.3952	24.2315	20.6943	9.59567	9.04484	9.29806	13.3056	14.5065	14.6168
ENSMUSG00000006930_ENSMUSG00000006930_Hap1_chr11:100347326-100356128	ENSMUSG00000006930	ENSMUSG00000006930	Hap1	chr11:100347326-100356128	protein_coding	0.209526	0.30369	0.296565	0.283503	0.470164	0.32231	0.0739899	0.462214	0.0559674	0.430867	0.372708	0.132996
ENSMUSG00000006931_ENSMUSG00000006931_Leprel4_chr11:100408455-100414836	ENSMUSG00000006931	ENSMUSG00000006931	Leprel4	chr11:100408455-100414836	protein_coding	5.04527	4.30381	4.91088	5.76247	5.5967	5.19617	2.67016	3.21431	3.50149	4.8461	4.38128	5.09954
ENSMUSG00000006932_ENSMUSG00000006932_Ctnnb1_chr9:120929215-120960507	ENSMUSG00000006932	ENSMUSG00000006932	Ctnnb1	chr9:120929215-120960507	protein_coding	96.6605	99.9843	105.598	112.193	107.452	97.4282	110.282	112.065	106.051	97.8597	101.438	109.837
ENSMUSG00000006941_ENSMUSG00000006941_Eif1b_chr9:120492605-120495327	ENSMUSG00000006941	ENSMUSG00000006941	Eif1b	chr9:120492605-120495327	protein_coding	21.7936	21.8252	21.1223	24.4326	23.1552	21.8675	22.9047	28.8828	27.3002	23.9695	24.2874	24.9512
ENSMUSG00000006948_ENSMUSG00000006948_Klk4_chr7:43881171-43885804	ENSMUSG00000006948	ENSMUSG00000006948	Klk4	chr7:43881171-43885804	protein_coding	0	0	0	0	0	0	0	0	0	0	0	0
ENSMUSG00000006958_ENSMUSG00000006958_Chrd_chr16:20733126-20742384	ENSMUSG00000006958	ENSMUSG00000006958	Chrd	chr16:20733126-20742384	protein_coding	0.766267	0.358814	0.892297	1.02159	0.857226	0.975362	0.475505	0.499507	0.602827	0.439862	0.523288	0.249319
ENSMUSG00000006998_ENSMUSG00000006998_Psmd2_chr16:20651651-20663414	ENSMUSG00000006998	ENSMUSG00000006998	Psmd2	chr16:20651651-20663414	protein_coding	53.7314	57.3081	61.9627	54.6537	56.3411	55.1389	68.1922	68.1522	67.4986	58.9187	60.861	59.3986
ENSMUSG00000007021_ENSMUSG00000007021_Syngr3_chr17:24685091-24689955	ENSMUSG00000007021	ENSMUSG00000007021	Syngr3	chr17:24685091-24689955	protein_coding	0.0471331	0.0797572	0.0641697	0.394924	0.256041	0.159456	0.0662359	0	0.0988506	0.0753703	0.0356793	0
ENSMUSG00000007029_ENSMUSG00000007029_Vars_chr17:35000986-35016322	ENSMUSG00000007029	ENSMUSG00000007029	Vars	chr17:35000986-35016322	protein_coding	12.0306	8.88507	13.5092	10.9441	12.4728	10.1276	10.0801	10.0886	7.6273	13.0555	15.7609	15.2349
ENSMUSG00000007030_ENSMUSG00000007030_Vwa7_chr17:35016578-35026741	ENSMUSG00000007030	ENSMUSG00000007030	Vwa7	chr17:35016578-35026741	protein_coding	0.0440588	0.085366	0.0150312	0.0734467	0.0199622	0.0341633	0.0465157	0.0445466	0.0693727	0.0176326	0.0834602	0.0219522
ENSMUSG00000007033_ENSMUSG00000007033_Hspa1l_chr17:34972702-34979284	ENSMUSG00000007033	ENSMUSG00000007033	Hspa1l	chr17:34972702-34979284	protein_coding	0.21964	0.185791	0.224497	0.335516	0.165778	0.0619285	0.257396	0.258774	0.153611	0.0292819	0.304937	0.182379
ENSMUSG00000007034_ENSMUSG00000007034_Slc44a4_chr17:34914465-34930436	ENSMUSG00000007034	ENSMUSG00000007034	Slc44a4	chr17:34914465-34930436	protein_coding	0	0	0	0	0	0	0.0285205	0	0	0	0	0
ENSMUSG00000007035_ENSMUSG00000007035_Msh5_chr17:35028604-35046745	ENSMUSG00000007035	ENSMUSG00000007035	Msh5	chr17:35028604-35046745	protein_coding	0.272721	0.045643	0.199402	0.229318	0.351742	0.53271	0.174136	1.10059	0.0565459	0.583343	0.141784	0
ENSMUSG00000007036_ENSMUSG00000007036_Abhd16a_chr17:35089262-35102987	ENSMUSG00000007036	ENSMUSG00000007036	Abhd16a	chr17:35089262-35102987	protein_coding	36.8435	36.3466	49.2518	56.0605	57.6525	52.6976	34.6466	33.2817	30.31	39.7497	33.0691	32.7329
ENSMUSG00000007038_ENSMUSG00000007038_Neu1_chr17:34931252-34935953	ENSMUSG00000007038	ENSMUSG00000007038	Neu1	chr17:34931252-34935953	protein_coding	9.01294	8.70823	11.197	10.386	10.0534	9.53341	9.41245	7.84137	8.39261	10.6063	9.63931	9.98919
ENSMUSG00000007039_ENSMUSG00000007039_Ddah2_chr17:35059034-35062095	ENSMUSG00000007039	ENSMUSG00000007039	Ddah2	chr17:35059034-35062095	protein_coding	8.61011	6.78035	9.89603	10.2476	8.89418	6.48147	6.40142	6.10061	5.49191	7.43105	7.39076	7.45446
ENSMUSG00000007041_ENSMUSG00000007041_Clic1_chr17:35049965-35058749	ENSMUSG00000007041	ENSMUSG00000007041	Clic1	chr17:35049965-35058749	protein_coding	18.3689	15.2319	17.5053	19.9098	17.8834	16.5497	25.6446	25.1593	19.5477	36.9803	41.9211	43.0225
ENSMUSG00000007050_ENSMUSG00000007050_Lsm2_chr17:34981861-34985891	ENSMUSG00000007050	ENSMUSG00000007050	Lsm2	chr17:34981861-34985891	protein_coding	6.09419	8.17653	7.93813	7.30584	8.98237	6.04346	11.3822	10.9265	9.75151	10.9814	13.5213	10.0261
ENSMUSG00000007080_ENSMUSG00000007080_Pole_chr5:110286305-110337474	ENSMUSG00000007080	ENSMUSG00000007080	Pole	chr5:110286305-110337474	protein_coding	0.455122	0.195264	0.413875	0.366088	0.408738	0.264918	0.0807282	0.246756	0.0125175	0.143856	0.177243	0.301427
ENSMUSG00000007097_ENSMUSG00000007097_Atp1a2_chr1:172271708-172298064	ENSMUSG00000007097	ENSMUSG00000007097	Atp1a2	chr1:172271708-172298064	protein_coding	534.041	432.042	522.567	580.528	508.735	518.857	320.54	388.396	336.806	415.073	370.388	370.204
ENSMUSG00000007107_ENSMUSG00000007107_Atp1a4_chr1:172223512-172258414	ENSMUSG00000007107	ENSMUSG00000007107	Atp1a4	chr1:172223512-172258414	protein_coding	0.381072	1.00976	1.02244	0.709278	0.840199	0.945622	0.312839	0.269626	0.199974	0.3253	0.134726	0.278479
ENSMUSG00000007122_ENSMUSG00000007122_Casq1_chr1:172209893-172219868	ENSMUSG00000007122	ENSMUSG00000007122	Casq1	chr1:172209893-172219868	protein_coding	7.05523	11.3284	18.5996	24.7032	18.3398	9.45925	16.6522	32.8986	18.9354	11.6318	13.116	13.0871
ENSMUSG00000007207_ENSMUSG00000007207_Stx1a_chr5:135023481-135051100	ENSMUSG00000007207	ENSMUSG00000007207	Stx1a	chr5:135023481-135051100	protein_coding	0.568011	0.643829	0.460708	0.325801	0.472366	0.573635	0.475477	0.515755	0.877517	0.473362	0.48027	0.843621
ENSMUSG00000007209_ENSMUSG00000007209_Ceacam9_chr7:16721928-16726110	ENSMUSG00000007209	ENSMUSG00000007209	Ceacam9	chr7:16721928-16726110	protein_coding	0	0	0	0	0.0641985	0	0	0	0	0	0	0
ENSMUSG00000007216_ENSMUSG00000007216_Zfp775_chr6:48613179-48623227	ENSMUSG00000007216	ENSMUSG00000007216	Zfp775	chr6:48613179-48623227	protein_coding	3.16552	2.98425	4.15973	3.58319	3.68277	3.49227	0.828	1.01644	1.07768	1.31825	1.11824	1.25757
ENSMUSG00000007279_ENSMUSG00000007279_Scube2_chr7:109798675-109865679	ENSMUSG00000007279	ENSMUSG00000007279	Scube2	chr7:109798675-109865679	protein_coding	0	0.0522572	0.0507194	0.025743	0	0.0309356	0.0514335	0.0498812	0	0	0	0.211836
ENSMUSG00000007338_ENSMUSG00000007338_Mrpl49_chr19:6053629-6057751	ENSMUSG00000007338	ENSMUSG00000007338	Mrpl49	chr19:6053629-6057751	protein_coding	26.3034	22.3049	24.9232	26.0538	26.7284	25.5288	19.0872	17.5356	16.7395	18.3141	18.2092	17.4886
ENSMUSG00000007379_ENSMUSG00000007379_Dennd2c_chr3:103102603-103169769	ENSMUSG00000007379	ENSMUSG00000007379	Dennd2c	chr3:103102603-103169769	protein_coding	0.555717	0.599846	0.637581	0.450921	1.20122	0.45918	0.303156	0.145964	0.342641	0.407126	0.42625	0.505037
ENSMUSG00000007411_ENSMUSG00000007411_Mark3_chr12:111574509-111656227	ENSMUSG00000007411	ENSMUSG00000007411	Mark3	chr12:111574509-111656227	protein_coding	12.451	12.7612	12.3886	14.6675	13.9983	13.0987	21.1594	21.7153	22.676	19.2164	20.1471	19.1507
ENSMUSG00000007415_ENSMUSG00000007415_Gatad1_chr5:3632931-3647934	ENSMUSG00000007415	ENSMUSG00000007415	Gatad1	chr5:3632931-3647934	protein_coding	33.9008	34.8974	35.1866	34.5114	31.7042	32.4841	35.8039	35.8939	35.8636	32.2824	33.2328	30.4509
ENSMUSG00000007440_ENSMUSG00000007440_Pcdhac1_chr18:36930284-37187657	ENSMUSG00000007440	ENSMUSG00000007440	Pcdhac1	chr18:36930284-37187657	protein_coding	0.032048	0.0138947	0.0434194	0.0526974	0.043232	0.0941563	0.0559724	0.0166217	0.0345226	0.114559	0.0602447	0.0475334
ENSMUSG00000007457_ENSMUSG00000007457_2310003L06Rik_chr5:87969458-87972870	ENSMUSG00000007457	ENSMUSG00000007457	2310003L06Rik	chr5:87969458-87972870	protein_coding	0	0	0	0	0	0	0	0	0	0	0	0
ENSMUSG00000007458_ENSMUSG00000007458_M6pr_chr6:122308719-122317680	ENSMUSG00000007458	ENSMUSG00000007458	M6pr	chr6:122308719-122317680	protein_coding	35.3738	33.5906	34.5539	38.4178	37.0904	37.2922	47.7827	52.2352	44.9902	41.3721	44.4765	44.1314
ENSMUSG00000007476_ENSMUSG00000007476_Lrrc8a_chr2:30237714-30282148	ENSMUSG00000007476	ENSMUSG00000007476	Lrrc8a	chr2:30237714-30282148	protein_coding	9.02933	9.36578	11.7803	11.5714	12.4575	11.8377	12.3499	13.6054	13.5327	15.1768	17.5202	18.4577
ENSMUSG00000007480_ENSMUSG00000007480_Mc5r_chr18:68337602-68339711	ENSMUSG00000007480	ENSMUSG00000007480	Mc5r	chr18:68337602-68339711	protein_coding	0.346785	0.293666	0.529161	0.288666	0.313523	0.513079	0.425296	0.261591	0.363081	0	0.065533	0
ENSMUSG00000007564_ENSMUSG00000007564_Ppp2r1a_chr17:20945310-20965916	ENSMUSG00000007564	ENSMUSG00000007564	Ppp2r1a	chr17:20945310-20965916	protein_coding	67.5595	69.1028	77.0874	66.5893	71.9775	64.5209	66.2703	67.4645	68.4409	68.5547	68.2359	69.654
ENSMUSG00000007570_ENSMUSG00000007570_Fance_chr17:28313529-28326568	ENSMUSG00000007570	ENSMUSG00000007570	Fance	chr17:28313529-28326568	protein_coding	8.37815	7.33798	10.2552	10.4607	12.0886	8.82856	4.54072	5.18288	5.18554	7.20938	9.41668	7.88124
ENSMUSG00000007589_ENSMUSG00000007589_Tinf2_chr14:55679082-55681817	ENSMUSG00000007589	ENSMUSG00000007589	Tinf2	chr14:55679082-55681817	protein_coding	6.66472	5.91491	6.78231	5.46102	7.11156	6.14055	4.18603	3.38776	4.03308	4.20108	4.01866	4.91249
ENSMUSG00000007591_ENSMUSG00000007591_Tssk4_chr14:55650181-55652539	ENSMUSG00000007591	ENSMUSG00000007591	Tssk4	chr14:55650181-55652539	protein_coding	0.0682782	0	0.139161	0	0.151892	0.346642	0.0479082	0	0.071539	0.109086	0.0423315	0.0557303
ENSMUSG00000007594_ENSMUSG00000007594_Hapln4_chr8:70083528-70090862	ENSMUSG00000007594	ENSMUSG00000007594	Hapln4	chr8:70083528-70090862	protein_coding	1.64859	1.26931	1.57787	0.492167	1.24857	1.26976	0.692611	0.771056	1.00719	0.76801	0.633822	0.465885
ENSMUSG00000007603_ENSMUSG00000007603_Dus3l_chr17:56764750-56770092	ENSMUSG00000007603	ENSMUSG00000007603	Dus3l	chr17:56764750-56770092	protein_coding	7.63091	7.55908	9.21155	8.82857	8.88019	8.3608	9.22816	9.38095	8.62653	11.0681	11.0174	10.3218
ENSMUSG00000007610_ENSMUSG00000007610_Gtpbp3_chr8:71488102-71499583	ENSMUSG00000007610	ENSMUSG00000007610	Gtpbp3	chr8:71488102-71499583	protein_coding	8.85709	7.85686	9.99287	9.49886	9.45432	9.33045	7.75629	7.27008	7.26593	9.36992	11.9149	10.111
ENSMUSG00000007613_ENSMUSG00000007613_Tgfbr1_chr4:47353221-47414931	ENSMUSG00000007613	ENSMUSG00000007613	Tgfbr1	chr4:47353221-47414931	protein_coding	3.85826	3.88045	3.55136	4.4482	3.53725	4.0565	4.04058	3.52201	3.20406	3.32777	3.96174	4.36046
ENSMUSG00000007617_ENSMUSG00000007617_Homer1_chr13:93303756-93404129	ENSMUSG00000007617	ENSMUSG00000007617	Homer1	chr13:93303756-93404129	protein_coding	3.5583	3.63654	3.18922	3.78565	3.35296	3.22623	6.25029	7.0761	5.86149	5.87692	5.33118	5.89646
ENSMUSG00000007646_ENSMUSG00000007646_Rad51c_chr11:87376644-87404954	ENSMUSG00000007646	ENSMUSG00000007646	Rad51c	chr11:87376644-87404954	protein_coding	0.843674	0.481636	0.595722	0.301908	0.457973	0.434182	0.232908	0.359137	0.334079	0.185654	0.22051	0.17875
ENSMUSG00000007653_ENSMUSG00000007653_Gabrb2_chr11:42419756-42629028	ENSMUSG00000007653	ENSMUSG00000007653	Gabrb2	chr11:42419756-42629028	protein_coding	0.0876801	0.459044	0.0448722	0.0913476	0.324741	0.0741763	0.015428	0.182758	0	0.0526352	0.0830431	0
ENSMUSG00000007655_ENSMUSG00000007655_Cav1_chr6:17306334-17341452	ENSMUSG00000007655	ENSMUSG00000007655	Cav1	chr6:17306334-17341452	protein_coding	445.737	440.551	533.119	553.98	511.34	450.454	846.642	798.539	850.439	456.092	490.764	518.919
ENSMUSG00000007656_ENSMUSG00000007656_Arpp19_chr9:75037613-75060313	ENSMUSG00000007656	ENSMUSG00000007656	Arpp19	chr9:75037613-75060313	protein_coding	58.7379	55.6376	54.9107	60.2309	59.8775	68.9146	84.3766	91.8794	69.254	74.7136	76.0894	68.6485
ENSMUSG00000007659_ENSMUSG00000007659_Bcl2l1_chr2:152780667-152831728	ENSMUSG00000007659	ENSMUSG00000007659	Bcl2l1	chr2:152780667-152831728	protein_coding	16.7775	13.2452	14.0937	15.3174	15.248	13.0948	19.2992	23.7335	19.4416	29.8714	29.5586	27.4035
ENSMUSG00000007670_ENSMUSG00000007670_Khsrp_chr17:57021057-57031507	ENSMUSG00000007670	ENSMUSG00000007670	Khsrp	chr17:57021057-57031507	protein_coding	12.4473	12.3972	14.1759	13.6985	14.9538	13.9229	9.3469	9.54958	9.50021	11.0154	11.4071	11.7273
ENSMUSG00000007682_ENSMUSG00000007682_Dio2_chr12:90724553-90738438	ENSMUSG00000007682	ENSMUSG00000007682	Dio2	chr12:90724553-90738438	protein_coding	1.10926	1.35051	1.0806	1.1589	1.17976	1.37019	211.054	222.776	230.935	99.3883	71.5712	83.3684
ENSMUSG00000007721_ENSMUSG00000007721_Ccdc124_chr8:70868226-70873490	ENSMUSG00000007721	ENSMUSG00000007721	Ccdc124	chr8:70868226-70873490	protein_coding	43.8403	43.425	52.8525	44.8797	50.9483	49.4706	54.4158	52.8279	50.515	54.9967	50.8497	52.433
ENSMUSG00000007739_ENSMUSG00000007739_Cct4_chr11:22990518-23003780	ENSMUSG00000007739	ENSMUSG00000007739	Cct4	chr11:22990518-23003780	protein_coding	48.5646	46.3015	48.5512	47.2095	45.9885	53.1847	60.3834	53.9507	58.8844	56.3907	56.2363	61.6507
ENSMUSG00000007777_ENSMUSG00000007777_0610009B22Rik_chr11:51685385-51688874	ENSMUSG00000007777	ENSMUSG00000007777	0610009B22Rik	chr11:51685385-51688874	protein_coding	19.1086	23.3734	19.1632	19.6363	19.4618	19.1461	22.5946	19.6889	22.1066	15.3926	14.8297	13.5348
ENSMUSG00000007783_ENSMUSG00000007783_Cpt1c_chr7:44959372-44974851	ENSMUSG00000007783	ENSMUSG00000007783	Cpt1c	chr7:44959372-44974851	protein_coding	0.865387	0.542183	0.917682	0.747833	0.900073	0.894708	0.202892	0.485692	0.437192	0.743652	0.558349	0.447132
ENSMUSG00000007805_ENSMUSG00000007805_Twist2_chr1:91801460-91848028	ENSMUSG00000007805	ENSMUSG00000007805	Twist2	chr1:91801460-91848028	protein_coding	2.50958	1.74964	2.50592	2.21243	2.53698	1.56028	1.29428	1.85787	1.31442	0.943168	1.78623	1.98518
ENSMUSG00000007812_ENSMUSG00000007812_Zfp655_chr5:145231722-145247302	ENSMUSG00000007812	ENSMUSG00000007812	Zfp655	chr5:145231722-145247302	protein_coding	10.5136	9.71562	11.9721	13.6902	11.3451	13.8115	16.4974	17.0571	19.3764	16.1885	14.4927	17.2575
ENSMUSG00000007815_ENSMUSG00000007815_Rhoa_chr9:108306204-108337939	ENSMUSG00000007815	ENSMUSG00000007815	Rhoa	chr9:108306204-108337939	protein_coding	112.756	115.662	115.258	123.565	122.552	116.055	118.86	115.427	115.714	128.753	127.662	128.775
ENSMUSG00000007817_ENSMUSG00000007817_Zmiz1_chr14:25459184-25666743	ENSMUSG00000007817	ENSMUSG00000007817	Zmiz1	chr14:25459184-25666743	protein_coding	9.93863	7.98731	11.1284	9.64715	10.7123	9.98435	7.14749	6.40167	7.48105	9.68693	12.0738	10.9538
ENSMUSG00000007827_ENSMUSG00000007827_Ankrd26_chr6:118502563-118562256	ENSMUSG00000007827	ENSMUSG00000007827	Ankrd26	chr6:118502563-118562256	protein_coding	0.78433	0.752411	0.834216	1.05613	0.957041	0.842235	0.520426	0.457761	0.332575	0.591743	0.663018	0.631343
ENSMUSG00000007833_ENSMUSG00000007833_Aldh16a1_chr7:45140683-45154584	ENSMUSG00000007833	ENSMUSG00000007833	Aldh16a1	chr7:45140683-45154584	protein_coding	10.222	12.5802	11.9586	10.5648	12.8803	10.1347	9.24874	6.53656	9.06118	9.88484	8.44341	7.50498
ENSMUSG00000007836_ENSMUSG00000007836_Hnrnpa0_chr13:58125878-58128556	ENSMUSG00000007836	ENSMUSG00000007836	Hnrnpa0	chr13:58125878-58128556	protein_coding	21.5004	19.0369	22.8168	22.1082	25.6131	23.1523	22.2214	21.3114	23.8603	26.0559	25.4799	29.2785
ENSMUSG00000007837_ENSMUSG00000007837_Prrg2_chr7:45053612-45062677	ENSMUSG00000007837	ENSMUSG00000007837	Prrg2	chr7:45053612-45062677	protein_coding	14.8779	16.5602	20.2878	12.7062	16.0331	20.6592	11.804	7.7165	13.4208	8.65534	6.59571	7.26126
ENSMUSG00000007850_ENSMUSG00000007850_Hnrnph1_chr11:50376989-50386528	ENSMUSG00000007850	ENSMUSG00000007850	Hnrnph1	chr11:50376989-50386528	protein_coding	94.2308	70.9456	66.8282	68.1786	71.3342	69.4509	90.3144	79.2968	79.2093	101.269	102.252	130.405
ENSMUSG00000007867_ENSMUSG00000007867_Ift43_chr12:86082560-86162458	ENSMUSG00000007867	ENSMUSG00000007867	Ift43	chr12:86082560-86162458	protein_coding	13.6859	10.4936	15.318	15.0108	15.1052	12.1791	5.28498	3.78931	3.95414	10.4328	8.45591	10.5812
ENSMUSG00000007872_ENSMUSG00000007872_Id3_chr4:136143496-136145755	ENSMUSG00000007872	ENSMUSG00000007872	Id3	chr4:136143496-136145755	protein_coding	29.2839	36.9733	33.5098	40.4527	35.5675	37.3071	31.9138	26.5912	26.1495	72.6834	73.9704	78.8153
ENSMUSG00000007877_ENSMUSG00000007877_Tcap_chr11:98383810-98384953	ENSMUSG00000007877	ENSMUSG00000007877	Tcap	chr11:98383810-98384953	protein_coding	15.5233	23.3722	48.8114	48.9669	32.8854	21.8052	32.8163	78.4682	50.1119	26.4465	31.29	18.0164
ENSMUSG00000007880_ENSMUSG00000007880_Arid1a_chr4:133679007-133756769	ENSMUSG00000007880	ENSMUSG00000007880	Arid1a	chr4:133679007-133756769	protein_coding	9.735	9.26693	11.0809	11.5481	12.2279	10.5213	7.8102	7.32677	7.17272	10.0861	9.13617	10.0341
ENSMUSG00000007888_ENSMUSG00000007888_Crlf1_chr8:70493157-70504081	ENSMUSG00000007888	ENSMUSG00000007888	Crlf1	chr8:70493157-70504081	protein_coding	0.0576498	0.225998	0.0392047	0.595568	0.27227	0.337279	0.364363	0.23376	0.362569	0.460745	0.349513	0.783973
ENSMUSG00000007891_ENSMUSG00000007891_Ctsd_chr7:142371147-142388038	ENSMUSG00000007891	ENSMUSG00000007891	Ctsd	chr7:142371147-142388038	protein_coding	511.624	537.085	582.201	438.715	499.659	515.179	587.262	590.676	656.716	434.505	423.69	412.658
ENSMUSG00000007892_ENSMUSG00000007892_Rplp1_chr9:61913283-61914538	ENSMUSG00000007892	ENSMUSG00000007892	Rplp1	chr9:61913283-61914538	protein_coding	1075.1	874.882	1156.4	1232.03	1181.17	1110.81	1255.61	1234.38	1153.59	1308.71	1291.25	1337.21
ENSMUSG00000007907_ENSMUSG00000007907_Cabs1_chr5:87979438-87981544	ENSMUSG00000007907	ENSMUSG00000007907	Cabs1	chr5:87979438-87981544	protein_coding	0	0	0	0	0	0	0	0	0	0	0	0
ENSMUSG00000007908_ENSMUSG00000007908_Hmgcll1_chr9:76014854-76136350	ENSMUSG00000007908	ENSMUSG00000007908	Hmgcll1	chr9:76014854-76136350	protein_coding	0.117421	0.0595776	0.112156	0.117435	0.0851214	0.139069	0.0165271	0	0	0.0187957	0	0.0936106
ENSMUSG00000007944_ENSMUSG00000007944_Ttc9b_chr7:27653914-27656208	ENSMUSG00000007944	ENSMUSG00000007944	Ttc9b	chr7:27653914-27656208	protein_coding	0	0	0	0	0	0	0.0818538	0	0	0	0	0
ENSMUSG00000007946_ENSMUSG00000007946_Phox2a_chr7:101818312-101823166	ENSMUSG00000007946	ENSMUSG00000007946	Phox2a	chr7:101818312-101823166	protein_coding	0.0449856	0	0.0306292	0.0374769	0.0814647	0.114146	0.0316136	0.090797	0.18871	0.107914	0.204338	0.179287
ENSMUSG00000007950_ENSMUSG00000007950_Abhd8_chr8:71456699-71463657	ENSMUSG00000007950	ENSMUSG00000007950	Abhd8	chr8:71456699-71463657	protein_coding	3.07583	2.64181	3.52157	3.41646	3.1646	2.87739	1.83383	1.5048	1.85709	1.67681	1.94035	1.99662
ENSMUSG00000007987_ENSMUSG00000007987_Rabl5_chr5:136908149-136913244	ENSMUSG00000007987	ENSMUSG00000007987	Rabl5	chr5:136908149-136913244	protein_coding	6.81699	6.37431	6.91454	5.37774	6.26239	5.76164	6.32933	7.78268	3.44141	8.90066	7.36567	5.96894
ENSMUSG00000007989_ENSMUSG00000007989_Fzd3_chr14:65201025-65262463	ENSMUSG00000007989	ENSMUSG00000007989	Fzd3	chr14:65201025-65262463	protein_coding	0.362313	0.035495	0.0859366	0.0524794	0.133142	0.0532676	0.236997	0.148554	0.264379	0.285597	0.254628	0.328836
ENSMUSG00000008028_ENSMUSG00000008028_1700008O03Rik_chr7:44360042-44385820	ENSMUSG00000008028	ENSMUSG00000008028	1700008O03Rik	chr7:44360042-44385820	protein_coding	0.600747	0.38078	0.310836	0.635192	0.602542	0.276128	0.140464	0.0136834	0.190757	0.0325208	0.141322	0.136965
ENSMUSG00000008035_ENSMUSG00000008035_Mid1ip1_chrX:10715012-10719690	ENSMUSG00000008035	ENSMUSG00000008035	Mid1ip1	chrX:10715012-10719690	protein_coding	22.3591	22.5604	26.9225	26.0967	20.7308	18.9112	10.8832	10.5755	13.1451	13.4839	11.8337	8.12001
ENSMUSG00000008036_ENSMUSG00000008036_Ap2s1_chr7:16738409-16749294	ENSMUSG00000008036	ENSMUSG00000008036	Ap2s1	chr7:16738409-16749294	protein_coding	53.8469	47.8755	61.6238	60.6963	65.4414	65.2068	54.8671	63.7936	60.7721	59.6087	54.4236	56.3207
ENSMUSG00000008090_ENSMUSG00000008090_Fgfrl1_chr5:108694228-108706950	ENSMUSG00000008090	ENSMUSG00000008090	Fgfrl1	chr5:108694228-108706950	protein_coding	31.1651	27.5155	35.511	31.8935	30.4757	32.6773	18.2352	15.7685	16.2628	30.1241	24.668	28.8668
ENSMUSG00000008129_ENSMUSG00000008129_4930432K21Rik_chr8:84148024-84172590	ENSMUSG00000008129	ENSMUSG00000008129	4930432K21Rik	chr8:84148024-84172590	protein_coding	0.410244	0.227299	0.862874	0.238142	0.421141	0.357605	0	0.116276	0	0.135243	0	0.0382478
ENSMUSG00000008136_ENSMUSG00000008136_Fhl2_chr1:43123073-43163961	ENSMUSG00000008136	ENSMUSG00000008136	Fhl2	chr1:43123073-43163961	protein_coding	0.610893	0.672134	0.498362	0.356136	0.110562	0.154982	0.471727	0.307848	0.768297	0.878661	0.739525	0.730307
ENSMUSG00000008140_ENSMUSG00000008140_Emc10_chr7:44489936-44496529	ENSMUSG00000008140	ENSMUSG00000008140	Emc10	chr7:44489936-44496529	protein_coding	62.6984	56.5949	69.1127	62.8249	62.383	65.1868	37.525	46.2097	45.5783	50.3507	44.2863	42.5771
ENSMUSG00000008153_ENSMUSG00000008153_Clstn3_chr6:124430758-124464794	ENSMUSG00000008153	ENSMUSG00000008153	Clstn3	chr6:124430758-124464794	protein_coding	131.907	145.795	142.959	124.898	177.497	159.113	438.796	508.234	519.556	284.617	214.585	225.597
ENSMUSG00000008167_ENSMUSG00000008167_Fbxw9_chr8:85060054-85067124	ENSMUSG00000008167	ENSMUSG00000008167	Fbxw9	chr8:85060054-85067124	protein_coding	4.55574	3.94479	5.50496	5.15439	4.55427	5.14424	2.96477	4.47921	4.02786	3.65778	2.91231	3.84748
ENSMUSG00000008193_ENSMUSG00000008193_Spib_chr7:44525994-44532071	ENSMUSG00000008193	ENSMUSG00000008193	Spib	chr7:44525994-44532071	protein_coding	0.064261	0.0543521	0.0876239	0.13389	0.0873256	0.108731	0.0225933	0	0	0.051413	0.0486715	0.0320085
ENSMUSG00000008200_ENSMUSG00000008200_Fnbp4_chr2:90745369-90781021	ENSMUSG00000008200	ENSMUSG00000008200	Fnbp4	chr2:90745369-90781021	protein_coding	12.7265	17.0432	15.1732	17.5333	13.049	16.9729	12.6706	12.4987	9.11595	11.7189	13.2619	16.0211
ENSMUSG00000008206_ENSMUSG00000008206_Cers4_chr8:4493025-4525757	ENSMUSG00000008206	ENSMUSG00000008206	Cers4	chr8:4493025-4525757	protein_coding	6.06266	4.62792	3.45737	6.05338	7.4977	4.57914	2.43415	3.38622	3.13286	3.94745	5.39774	6.69801
ENSMUSG00000008226_ENSMUSG00000008226_Scrn3_chr2:73312600-73337818	ENSMUSG00000008226	ENSMUSG00000008226	Scrn3	chr2:73312600-73337818	protein_coding	14.5467	15.5374	13.5998	15.6573	14.0512	12.6871	11.5188	10.8331	12.483	12.2833	11.2012	9.61907
ENSMUSG00000008301_ENSMUSG00000008301_Phax_chr18:56562442-56587712	ENSMUSG00000008301	ENSMUSG00000008301	Phax	chr18:56562442-56587712	protein_coding	12.2793	11.7964	10.6688	11.2203	11.8714	12.1998	16.783	18.4575	14.0999	13.1405	14.6097	17.4576
ENSMUSG00000008305_ENSMUSG00000008305_Tle1_chr4:72117141-72200919	ENSMUSG00000008305	ENSMUSG00000008305	Tle1	chr4:72117141-72200919	protein_coding	7.64983	8.48853	9.04807	9.0827	9.51013	8.03155	8.4328	6.19088	6.49037	7.49448	8.96512	8.02598
ENSMUSG00000008307_ENSMUSG00000008307_1700109H08Rik_chr5:3571565-3584356	ENSMUSG00000008307	ENSMUSG00000008307	1700109H08Rik	chr5:3571565-3584356	protein_coding	0	0.12389	0.991188	0	0	0.619381	0	0	1.81808	0	0	0
ENSMUSG00000008318_ENSMUSG00000008318_Relt_chr7:100845847-100863446	ENSMUSG00000008318	ENSMUSG00000008318	Relt	chr7:100845847-100863446	protein_coding	0.225416	0.270364	0.886917	0.365872	0.289711	0.342937	0.945645	0.472425	0.891052	0.569565	0.690103	0.847616
ENSMUSG00000008333_ENSMUSG00000008333_Snrpb2_chr2:143063038-143072853	ENSMUSG00000008333	ENSMUSG00000008333	Snrpb2	chr2:143063038-143072853	protein_coding	10.9196	11.6019	9.54904	9.59558	7.95781	9.81399	8.31537	6.94195	6.47121	8.95969	9.60021	10.9879
ENSMUSG00000008348_ENSMUSG00000008348_Ubc_chr5:125385964-125390202	ENSMUSG00000008348	ENSMUSG00000008348	Ubc	chr5:125385964-125390202	protein_coding	364.777	362.274	404.49	311.71	351.586	372.741	333.153	321.466	256.814	250.618	284.611	298.527
ENSMUSG00000008373_ENSMUSG00000008373_Prpf31_chr7:3629984-3642486	ENSMUSG00000008373	ENSMUSG00000008373	Prpf31	chr7:3629984-3642486	protein_coding	11.8035	12.2927	13.1848	12.8819	11.6526	9.10177	16.8673	14.9232	16.1579	15.4178	14.6274	17.0214
ENSMUSG00000008384_ENSMUSG00000008384_Sertad1_chr7:27486909-27490316	ENSMUSG00000008384	ENSMUSG00000008384	Sertad1	chr7:27486909-27490316	protein_coding	6.71619	6.76517	8.43373	7.92823	7.51707	6.96017	11.9387	10.8012	11.072	14.1759	17.2073	17.9719
ENSMUSG00000008393_ENSMUSG00000008393_Carhsp1_chr16:8658586-8672153	ENSMUSG00000008393	ENSMUSG00000008393	Carhsp1	chr16:8658586-8672153	protein_coding	72.4389	73.9119	72.2598	81.775	81.623	83.967	40.0405	39.1438	44.8846	36.4211	32.9347	36.7168
ENSMUSG00000008398_ENSMUSG00000008398_Elk3_chr10:93247413-93311135	ENSMUSG00000008398	ENSMUSG00000008398	Elk3	chr10:93247413-93311135	protein_coding	10.4183	9.32992	12.1627	12.3735	14.4678	9.30168	5.45183	5.60895	4.90239	7.20528	7.7775	7.13355
ENSMUSG00000008429_ENSMUSG00000008429_Herpud2_chr9:25108129-25151781	ENSMUSG00000008429	ENSMUSG00000008429	Herpud2	chr9:25108129-25151781	protein_coding	12.0552	12.5729	13.4288	14.0201	13.2879	12.5465	10.5697	10.1319	10.215	10.1152	10.4172	11.2963
ENSMUSG00000008435_ENSMUSG00000008435_Rdh13_chr7:4424769-4445649	ENSMUSG00000008435	ENSMUSG00000008435	Rdh13	chr7:4424769-4445649	protein_coding	18.429	20.0875	18.3498	18.5752	14.7164	19.8616	42.2344	43.6053	43.108	28.919	29.0665	25.2966
ENSMUSG00000008438_ENSMUSG00000008438_Adam21_chr12:81558583-81568474	ENSMUSG00000008438	ENSMUSG00000008438	Adam21	chr12:81558583-81568474	protein_coding	0.061307	0.0259261	0.0417989	0	0	0.0259303	0	0	0	0	0	0
ENSMUSG00000008450_ENSMUSG00000008450_Nutf2_chr8:105860633-105880402	ENSMUSG00000008450	ENSMUSG00000008450	Nutf2	chr8:105860633-105880402	protein_coding	7.74114	8.32989	8.55646	8.90794	8.28817	8.71865	13.4824	13.8076	13.329	13.3957	14.7985	12.899
ENSMUSG00000008461_ENSMUSG00000008461_Fut1_chr7:45617605-45621059	ENSMUSG00000008461	ENSMUSG00000008461	Fut1	chr7:45617605-45621059	protein_coding	0	0	0	0	0	0	0	0	0	0.0279398	0	0
ENSMUSG00000008475_ENSMUSG00000008475_Arpc5_chr1:152766541-152775597	ENSMUSG00000008475	ENSMUSG00000008475	Arpc5	chr1:152766541-152775597	protein_coding	33.533	33.6528	31.4273	37.8646	34.4051	37.5784	30.3187	30.894	30.3528	33.0086	35.8011	38.1632
ENSMUSG00000008482_ENSMUSG00000008482_Rnf151_chr17:24715838-24718057	ENSMUSG00000008482	ENSMUSG00000008482	Rnf151	chr17:24715838-24718057	protein_coding	0.0843165	0	0	0	0.152471	0	0.0590982	0	0	0.134615	0.12748	0.0839829
ENSMUSG00000008489_ENSMUSG00000008489_Elavl2_chr4:91250762-91400785	ENSMUSG00000008489	ENSMUSG00000008489	Elavl2	chr4:91250762-91400785	protein_coding	0.0608425	0	0	0	0	0	0	0.0241789	0	0.0191425	0	0
ENSMUSG00000008496_ENSMUSG00000008496_Pou2f2_chr7:25091908-25159922	ENSMUSG00000008496	ENSMUSG00000008496	Pou2f2	chr7:25091908-25159922	protein_coding	0.391823	0.669374	0.273067	0.330294	0.344076	0.156369	0.213837	0.159056	0.376744	0.0874468	0.110351	0.188716
ENSMUSG00000008540_ENSMUSG00000008540_Mgst1_chr6:138140315-138156755	ENSMUSG00000008540	ENSMUSG00000008540	Mgst1	chr6:138140315-138156755	protein_coding	403.166	397.386	423.935	454.532	430.082	485.802	466.214	423.118	455.293	423.113	406.618	399.628
ENSMUSG00000008575_ENSMUSG00000008575_Nfib_chr4:82290172-82705750	ENSMUSG00000008575	ENSMUSG00000008575	Nfib	chr4:82290172-82705750	protein_coding	13.6489	12.0976	12.8436	15.0711	12.8456	11.754	8.11753	8.33737	8.61455	9.04143	8.36192	9.59381
ENSMUSG00000008590_ENSMUSG00000008590_Htr3b_chr9:48935007-48964990	ENSMUSG00000008590	ENSMUSG00000008590	Htr3b	chr9:48935007-48964990	protein_coding	0	0	0	0	0	0	0	0	0	0	0	0
ENSMUSG00000008601_ENSMUSG00000008601_Rab25_chr3:88542028-88548300	ENSMUSG00000008601	ENSMUSG00000008601	Rab25	chr3:88542028-88548300	protein_coding	0	0	0.081068	0	0.0856062	0	0	0	0	0.100189	0	0.0943333
ENSMUSG00000008604_ENSMUSG00000008604_Ubqln4_chr3:88553715-88569725	ENSMUSG00000008604	ENSMUSG00000008604	Ubqln4	chr3:88553715-88569725	protein_coding	26.2696	23.6114	23.3846	23.5081	23.9682	22.4887	24.6577	24.301	24.7937	26.1159	24.6433	25.5776
ENSMUSG00000008658_ENSMUSG00000008658_Rbfox1_chr16:6809221-7412479	ENSMUSG00000008658	ENSMUSG00000008658	Rbfox1	chr16:6809221-7412479	protein_coding	0.334824	0.706353	0.428887	1.27633	0.675036	0.398001	1.29157	1.25589	0.604283	0.527437	0.567077	0.488638
ENSMUSG00000008668_ENSMUSG00000008668_Rps18_chr17:33951998-33956001	ENSMUSG00000008668	ENSMUSG00000008668	Rps18	chr17:33951998-33956001	protein_coding	147.06	151.561	171.692	159.525	168.895	153.191	186.616	204.2	168.295	195.052	198.262	225.885
ENSMUSG00000008682_ENSMUSG00000008682_Rpl10_chrX:74270811-74273135	ENSMUSG00000008682	ENSMUSG00000008682	Rpl10	chrX:74270811-74273135	protein_coding	397.189	367.313	393.785	415.192	387.704	408.034	480.755	501.889	474.937	461.974	494.508	489.187
ENSMUSG00000008683_ENSMUSG00000008683_Rps15a_chr7:118104377-118116186	ENSMUSG00000008683	ENSMUSG00000008683	Rps15a	chr7:118104377-118116186	protein_coding	395.928	341.917	470.205	455.157	421.92	405.713	514.13	546.121	444	530.639	544.182	578.512
ENSMUSG00000008690_ENSMUSG00000008690_Ncaph2_chr15:89355718-89372826	ENSMUSG00000008690	ENSMUSG00000008690	Ncaph2	chr15:89355718-89372826	protein_coding	25.4641	21.6084	24.7208	25.0011	24.3493	27.8874	16.7746	23.0091	20.8696	20.2277	19.6135	17.0621
ENSMUSG00000008730_ENSMUSG00000008730_Hipk1_chr3:103739814-103791563	ENSMUSG00000008730	ENSMUSG00000008730	Hipk1	chr3:103739814-103791563	protein_coding	16.4627	15.5441	15.5276	16.5575	15.4597	16.7724	21.6916	21.0047	21.2364	22.3408	23.1883	21.9924
ENSMUSG00000008734_ENSMUSG00000008734_Gprc5b_chr7:118972039-118995211	ENSMUSG00000008734	ENSMUSG00000008734	Gprc5b	chr7:118972039-118995211	protein_coding	26.7841	28.7683	27.7822	23.1729	27.4066	26.1845	16.9762	17.6111	16.2257	10.4361	11.0719	12.7146
ENSMUSG00000008763_ENSMUSG00000008763_Man1a2_chr3:100562207-100685503	ENSMUSG00000008763	ENSMUSG00000008763	Man1a2	chr3:100562207-100685503	protein_coding	4.13135	2.50895	3.43203	6.41467	3.35335	3.23388	6.26172	5.59847	4.54197	4.96997	6.18362	5.21372
ENSMUSG00000008789_ENSMUSG00000008789_Ceacam5_chr7:17713251-17761121	ENSMUSG00000008789	ENSMUSG00000008789	Ceacam5	chr7:17713251-17761121	protein_coding	0	0	0	0	0	0	0	0	0	0	0	0
ENSMUSG00000008813_ENSMUSG00000008813_Tppp2_chr14:51918424-51920699	ENSMUSG00000008813	ENSMUSG00000008813	Tppp2	chr14:51918424-51920699	protein_coding	0	0	0	0	0	0	0	0	0	0	0	0
ENSMUSG00000008822_ENSMUSG00000008822_Acyp1_chr12:85272397-85288438	ENSMUSG00000008822	ENSMUSG00000008822	Acyp1	chr12:85272397-85288438	protein_coding	23.131	23.2621	29.2187	28.5153	31.2931	24.6902	16.2127	15.3774	18.0142	16.7269	15.3771	17.4489
ENSMUSG00000008843_ENSMUSG00000008843_Cldn13_chr5:134914248-134915526	ENSMUSG00000008843	ENSMUSG00000008843	Cldn13	chr5:134914248-134915526	protein_coding	0	0	0	0	0	0	0	0	0	0	0	0
ENSMUSG00000008845_ENSMUSG00000008845_Cd163_chr6:124304650-124330527	ENSMUSG00000008845	ENSMUSG00000008845	Cd163	chr6:124304650-124330527	protein_coding	4.60623	4.77397	6.2344	7.86139	5.10935	6.68194	4.04689	5.86063	5.32892	8.45524	8.62662	6.9383
ENSMUSG00000008855_ENSMUSG00000008855_Hdac5_chr11:102194431-102230166	ENSMUSG00000008855	ENSMUSG00000008855	Hdac5	chr11:102194431-102230166	protein_coding	32.4078	34.2705	44.946	36.7239	35.6171	32.9318	13.9227	13.643	19.5177	12.8595	13.5611	14.9941
ENSMUSG00000008859_ENSMUSG00000008859_Rala_chr13:17880574-17944239	ENSMUSG00000008859	ENSMUSG00000008859	Rala	chr13:17880574-17944239	protein_coding	28.0736	28.2456	25.5671	26.3486	23.4295	26.2663	24.8269	26.2284	25.9442	18.2566	18.2211	19.6718
ENSMUSG00000008874_ENSMUSG00000008874_Clec3a_chr8:114418085-114425846	ENSMUSG00000008874	ENSMUSG00000008874	Clec3a	chr8:114418085-114425846	protein_coding	0	0	0	0	0	0	0	0	0	0	0	0
ENSMUSG00000008892_ENSMUSG00000008892_Vdac3_chr8:22577074-22593813	ENSMUSG00000008892	ENSMUSG00000008892	Vdac3	chr8:22577074-22593813	protein_coding	91.4001	86.4676	88.2486	82.695	80.7357	80.8302	83.5366	91.2804	86.6995	79.4545	85.0358	77.2996
ENSMUSG00000008932_ENSMUSG00000008932_Slc1a7_chr4:107968331-108013532	ENSMUSG00000008932	ENSMUSG00000008932	Slc1a7	chr4:107968331-108013532	protein_coding	0	0	0.0403736	0.0986839	0.0268192	0.0834241	0	0.0299122	0.0517128	0	0.0373309	0.0590026
ENSMUSG00000008958_ENSMUSG00000008958_Vps72_chr3:95111021-95123051	ENSMUSG00000008958	ENSMUSG00000008958	Vps72	chr3:95111021-95123051	protein_coding	18.0928	19.0554	21.6829	21.311	22.2316	18.4516	15.4685	15.8239	13.8884	15.7833	15.218	13.2189
ENSMUSG00000008976_ENSMUSG00000008976_Gabpa_chr16:84834924-84863779	ENSMUSG00000008976	ENSMUSG00000008976	Gabpa	chr16:84834924-84863779	protein_coding	26.5723	20.4484	22.3254	20.3334	17.4231	22.8201	25.5018	20.6671	26.3619	22.1055	18.6407	18.4613
ENSMUSG00000008999_ENSMUSG00000008999_Bmp7_chr2:172868011-172940321	ENSMUSG00000008999	ENSMUSG00000008999	Bmp7	chr2:172868011-172940321	protein_coding	0.454897	0.34414	0.261303	0.21946	0.282457	0.202511	0.0842312	0.214677	0.108306	0.172429	0.243137	0.0715654
ENSMUSG00000009013_ENSMUSG00000009013_Dynll1_chr5:115297109-115300999	ENSMUSG00000009013	ENSMUSG00000009013	Dynll1	chr5:115297109-115300999	protein_coding	32.6247	36.9158	38.4929	45.8186	49.781	45.583	128.531	114.735	106.506	94.2225	81.931	81.1218
ENSMUSG00000009030_ENSMUSG00000009030_Pdcl_chr2:37350073-37359332	ENSMUSG00000009030	ENSMUSG00000009030	Pdcl	chr2:37350073-37359332	protein_coding	11.3076	11.6169	11.2534	12.3818	12.5503	11.8638	8.2767	10.0091	10.9706	10.1018	11.2757	10.2555
ENSMUSG00000009035_ENSMUSG00000009035_Tmem184b_chr15:79360683-79403303	ENSMUSG00000009035	ENSMUSG00000009035	Tmem184b	chr15:79360683-79403303	protein_coding	22.5241	21.8742	25.2588	22.1007	25.052	21.8723	14.4671	12.7273	14.7284	14.4297	14.1368	14.5641
ENSMUSG00000009047_ENSMUSG00000009047_Gm5965_chr16:88777895-88778528	ENSMUSG00000009047	ENSMUSG00000009047	Gm5965	chr16:88777895-88778528	protein_coding	0	0	0	0	0	0	0	0	0	0	0	0
ENSMUSG00000009070_ENSMUSG00000009070_Rtdr1_chr10:74957476-75032586	ENSMUSG00000009070	ENSMUSG00000009070	Rtdr1	chr10:74957476-75032586	protein_coding	0	0	0	0	0	0	0	0	0	0.115116	0	0
ENSMUSG00000009073_ENSMUSG00000009073_Nf2_chr11:4765844-4849536	ENSMUSG00000009073	ENSMUSG00000009073	Nf2	chr11:4765844-4849536	protein_coding	33.8174	34.032	34.2357	34.2058	34.1574	32.7234	31.8946	30.8706	33.2444	36.6924	29.8208	34.0772
ENSMUSG00000009075_ENSMUSG00000009075_Cabp7_chr11:4736891-4746778	ENSMUSG00000009075	ENSMUSG00000009075	Cabp7	chr11:4736891-4746778	protein_coding	0.47928	0.289569	0.419991	0.37084	0.372115	0.289583	0.216678	0.345786	0.466928	0.410806	0.570401	0.307013
ENSMUSG00000009076_ENSMUSG00000009076_Zmat5_chr11:4704677-4737669	ENSMUSG00000009076	ENSMUSG00000009076	Zmat5	chr11:4704677-4737669	protein_coding	8.19982	6.71246	7.82156	6.81833	8.41917	6.09252	7.09051	8.2111	5.76033	8.78135	7.35894	9.28965
ENSMUSG00000009079_ENSMUSG00000009079_Ewsr1_chr11:5069688-5099266	ENSMUSG00000009079	ENSMUSG00000009079	Ewsr1	chr11:5069688-5099266	protein_coding	89.6729	80.8341	80.043	90.5269	97.1479	88.1332	102.228	107.94	146.829	136.808	104.186	134.552
ENSMUSG00000009090_ENSMUSG00000009090_Ap1b1_chr11:4986823-5042791	ENSMUSG00000009090	ENSMUSG00000009090	Ap1b1	chr11:4986823-5042791	protein_coding	19.9994	21.52	22.6319	21.4434	22.3131	22.4703	26.6957	26.4542	32.3215	22.7083	21.0916	21.766
ENSMUSG00000009092_ENSMUSG00000009092_Derl3_chr10:75893397-75895941	ENSMUSG00000009092	ENSMUSG00000009092	Derl3	chr10:75893397-75895941	protein_coding	0.366771	0.0620997	0.348671	0.183229	0.199051	0.12405	0	0.0738576	0.0768417	0.234337	0.11095	0.0730704
ENSMUSG00000009093_ENSMUSG00000009093_Gstt4_chr10:75814942-75822543	ENSMUSG00000009093	ENSMUSG00000009093	Gstt4	chr10:75814942-75822543	protein_coding	0.112895	0	0.152721	0.0938917	0.101935	0.184812	0	0	0	0.0899829	0.0852255	0
ENSMUSG00000009097_ENSMUSG00000009097_Tbx1_chr16:18581712-18586969	ENSMUSG00000009097	ENSMUSG00000009097	Tbx1	chr16:18581712-18586969	protein_coding	0.105542	0	0.179518	0.0879124	0.191073	0.267781	0	0	0.0553252	0.0421828	0.199695	0.0525757
ENSMUSG00000009108_ENSMUSG00000009108_Gnat2_chr3:108092788-108101432	ENSMUSG00000009108	ENSMUSG00000009108	Gnat2	chr3:108092788-108101432	protein_coding	0.908631	0.607994	0.490349	0.791719	0.750796	1.35491	0.122789	0	0	0.17248	0.16347	0
ENSMUSG00000009112_ENSMUSG00000009112_Bcl2l13_chr6:120836229-120892842	ENSMUSG00000009112	ENSMUSG00000009112	Bcl2l13	chr6:120836229-120892842	protein_coding	21.167	20.157	21.3694	22.0848	20.9206	20.3702	29.572	28.5531	29.0362	25.0932	22.5845	25.1867
ENSMUSG00000009114_ENSMUSG00000009114_2610028H24Rik_chr10:76449080-76461110	ENSMUSG00000009114	ENSMUSG00000009114	2610028H24Rik	chr10:76449080-76461110	protein_coding	0	0	0.0447732	0	0	0	0.0462394	0	0.0690435	0.0526395	0	0
ENSMUSG00000009115_ENSMUSG00000009115_Spatc1l_chr10:76562271-76570201	ENSMUSG00000009115	ENSMUSG00000009115	Spatc1l	chr10:76562271-76570201	protein_coding	0.0736146	0.0821948	0.0999722	0	0	0	0.0516339	0	0	0	0	0
ENSMUSG00000009145_ENSMUSG00000009145_Dqx1_chr6:83057843-83067210	ENSMUSG00000009145	ENSMUSG00000009145	Dqx1	chr6:83057843-83067210	protein_coding	0.591678	0.810172	0.787782	0.821801	0.56159	0.691196	0.574845	0.711813	0.709621	0.315639	0.341491	0.336916
ENSMUSG00000009185_ENSMUSG00000009185_Ccl8_chr11:82115184-82116799	ENSMUSG00000009185	ENSMUSG00000009185	Ccl8	chr11:82115184-82116799	protein_coding	2.71178	1.15288	1.80792	4.27365	2.92262	5.03484	1.50214	0.268789	1.12763	6.6584	4.88729	6.74293
ENSMUSG00000009207_ENSMUSG00000009207_Lnp_chr2:74520290-74579435	ENSMUSG00000009207	ENSMUSG00000009207	Lnp	chr2:74520290-74579435	protein_coding	2.56582	1.79096	1.75486	2.02984	2.24107	1.89833	2.23368	1.51941	1.57781	1.543	2.26269	2.08358
ENSMUSG00000009210_ENSMUSG00000009210_2310007L24Rik_chr11:106365473-106377114	ENSMUSG00000009210	ENSMUSG00000009210	2310007L24Rik	chr11:106365473-106377114	protein_coding	0	0.124328	0	0.152614	0	0	0	0.311379	0	0	0	0
ENSMUSG00000009214_ENSMUSG00000009214_Tmem8c_chr2:27061635-27072179	ENSMUSG00000009214	ENSMUSG00000009214	Tmem8c	chr2:27061635-27072179	protein_coding	0	0	0	0	0	0	0	0	0	0	0.0624081	0
ENSMUSG00000009216_ENSMUSG00000009216_Fam163b_chr2:27110379-27142491	ENSMUSG00000009216	ENSMUSG00000009216	Fam163b	chr2:27110379-27142491	protein_coding	0.301192	0.203791	0.184826	0.376488	0.382007	0.433133	0	0	0	0.0722979	0.0228142	0.0300131
ENSMUSG00000009246_ENSMUSG00000009246_Trpm5_chr7:143069152-143094642	ENSMUSG00000009246	ENSMUSG00000009246	Trpm5	chr7:143069152-143094642	protein_coding	0.0242867	0	0	0	0.14364	0.134581	0	0	0	0	0.120092	0
ENSMUSG00000009248_ENSMUSG00000009248_Ascl2_chr7:142966821-142969264	ENSMUSG00000009248	ENSMUSG00000009248	Ascl2	chr7:142966821-142969264	protein_coding	0	0.150321	0.0401921	0	0.0534936	0.0499879	0.0415002	0	0	0.0946016	0.0447259	0.117918
ENSMUSG00000009281_ENSMUSG00000009281_Rarres2_chr6:48569697-48572670	ENSMUSG00000009281	ENSMUSG00000009281	Rarres2	chr6:48569697-48572670	protein_coding	108.076	106.797	132.183	179.103	167.645	128.102	107.441	95.1541	105.572	175.499	173.367	175.247
ENSMUSG00000009291_ENSMUSG00000009291_Pttg1ip_chr10:77581719-77598732	ENSMUSG00000009291	ENSMUSG00000009291	Pttg1ip	chr10:77581719-77598732	protein_coding	60.3701	58.9015	66.7464	64.6214	65.1083	65.6052	54.0006	58.5526	55.6099	54.8649	53.2399	57.9274
ENSMUSG00000009292_ENSMUSG00000009292_Trpm2_chr10:77907721-77970563	ENSMUSG00000009292	ENSMUSG00000009292	Trpm2	chr10:77907721-77970563	protein_coding	0.392371	0.133109	0.146054	0.435048	0.166018	0.263233	0.417874	0.171169	0.201946	0.309712	1.95248	0.607024
ENSMUSG00000009293_ENSMUSG00000009293_Ube2g2_chr10:77622274-77645993	ENSMUSG00000009293	ENSMUSG00000009293	Ube2g2	chr10:77622274-77645993	protein_coding	18.9537	23.6655	22.1487	21.0198	21.2929	22.4799	27.5403	33.8917	29.2451	24.6582	22.9826	26.5932
ENSMUSG00000009350_ENSMUSG00000009350_Mpo_chr11:87793580-87804413	ENSMUSG00000009350	ENSMUSG00000009350	Mpo	chr11:87793580-87804413	protein_coding	0	0	0.126034	0.0313572	0	0	0.265604	0.0380023	0.198962	0	0	0
ENSMUSG00000009356_ENSMUSG00000009356_Lpo_chr11:87806427-87828289	ENSMUSG00000009356	ENSMUSG00000009356	Lpo	chr11:87806427-87828289	protein_coding	0	0	0	0	0	0	0	0	0	0	0	0
ENSMUSG00000009376_ENSMUSG00000009376_Met_chr6:17463799-17573980	ENSMUSG00000009376	ENSMUSG00000009376	Met	chr6:17463799-17573980	protein_coding	3.66531	3.64319	2.90256	4.31858	3.48423	4.06211	3.53418	3.97195	2.9637	4.21545	3.84278	7.25348
ENSMUSG00000009378_ENSMUSG00000009378_Slc16a12_chr19:34668402-34747289	ENSMUSG00000009378	ENSMUSG00000009378	Slc16a12	chr19:34668402-34747289	protein_coding	0.1941	0.200606	0.0883005	0.161776	0.23453	0.182452	0.303593	0.152642	0.362214	0.276199	0.326821	0.171937
ENSMUSG00000009394_ENSMUSG00000009394_Syn2_chr6:115134901-115282626	ENSMUSG00000009394	ENSMUSG00000009394	Syn2	chr6:115134901-115282626	protein_coding	1.81158	1.78024	2.04176	0.993481	1.19356	1.32668	3.67372	2.35491	3.87121	3.30291	2.97642	2.5529
ENSMUSG00000009406_ENSMUSG00000009406_Elk1_chrX:20933394-20950608	ENSMUSG00000009406	ENSMUSG00000009406	Elk1	chrX:20933394-20950608	protein_coding	2.87276	2.82694	3.2283	3.02845	3.43982	3.47983	3.92851	3.92272	3.92485	3.96818	4.41566	3.82698
ENSMUSG00000009418_ENSMUSG00000009418_Nav1_chr1:135434579-135585355	ENSMUSG00000009418	ENSMUSG00000009418	Nav1	chr1:135434579-135585355	protein_coding	1.75625	1.51252	1.93558	2.45778	2.32876	2.10609	1.90257	1.69101	1.96945	2.39025	2.68792	2.71772
ENSMUSG00000009470_ENSMUSG00000009470_Tnpo1_chr13:98839018-98926384	ENSMUSG00000009470	ENSMUSG00000009470	Tnpo1	chr13:98839018-98926384	protein_coding	8.73864	9.38562	8.40824	9.14492	8.38086	8.49797	8.41323	7.876	7.23391	8.99815	9.1359	10.5265
ENSMUSG00000009471_ENSMUSG00000009471_Myod1_chr7:46376473-46379092	ENSMUSG00000009471	ENSMUSG00000009471	Myod1	chr7:46376473-46379092	protein_coding	0	0.0851331	0.0684695	0.0838105	0.0455413	0.0425468	0.247382	0.152239	0.105493	0.281518	0.152308	0.400969
ENSMUSG00000009487_ENSMUSG00000009487_Otog_chr7:46240986-46311434	ENSMUSG00000009487	ENSMUSG00000009487	Otog	chr7:46240986-46311434	protein_coding	0	0	0	0.00702848	0	0	0.0059391	0	0	0	0	0
ENSMUSG00000009535_ENSMUSG00000009535_Rnmt_chr18:68300354-68324852	ENSMUSG00000009535	ENSMUSG00000009535	Rnmt	chr18:68300354-68324852	protein_coding	8.78752	9.90856	8.67703	7.38905	7.57376	9.2407	21.5	19.7882	19.7062	12.7045	11.2246	15.7592
ENSMUSG00000009545_ENSMUSG00000009545_Kcnq1_chr7:143107253-143427042	ENSMUSG00000009545	ENSMUSG00000009545	Kcnq1	chr7:143107253-143427042	protein_coding	0.46996	0.546522	0.821168	0.807752	1.25069	0.646021	0.351271	0.445195	0.369872	0.658073	0.600729	0.468308
ENSMUSG00000009549_ENSMUSG00000009549_Srp14_chr2:118475849-118479711	ENSMUSG00000009549	ENSMUSG00000009549	Srp14	chr2:118475849-118479711	protein_coding	71.6077	66.207	71.9755	74.6736	73.5569	72.1481	76.0593	80.8137	77.368	79.031	77.7047	71.6504
ENSMUSG00000009551_ENSMUSG00000009551_6330409D20Rik_chr2:32732619-32741016	ENSMUSG00000009551	ENSMUSG00000009551	6330409D20Rik	chr2:32732619-32741016	protein_coding	0.27233	0.535978	0.458338	0	0.42604	0.153487	0.190796	0.273813	0.0950269	0.307216	0.343035	0.0904126
ENSMUSG00000009555_ENSMUSG00000009555_Cdk9_chr2:32705783-32713076	ENSMUSG00000009555	ENSMUSG00000009555	Cdk9	chr2:32705783-32713076	protein_coding	19.6474	18.9052	22.284	19.4166	22.2952	21.4621	19.9656	20.6714	19.0899	24.3507	24.8134	21.6443
ENSMUSG00000009563_ENSMUSG00000009563_Tor2a_chr2:32757233-32762244	ENSMUSG00000009563	ENSMUSG00000009563	Tor2a	chr2:32757233-32762244	protein_coding	14.1821	15.3046	21.1356	17.3285	18.1589	15.4239	12.483	7.48057	9.04575	11.242	7.51946	10.5475
ENSMUSG00000009566_ENSMUSG00000009566_Fpgs_chr2:32682608-32704137	ENSMUSG00000009566	ENSMUSG00000009566	Fpgs	chr2:32682608-32704137	protein_coding	2.83386	2.56212	3.1586	4.58354	3.36305	3.61307	3.15754	3.16296	1.90423	6.88824	5.62208	6.68571
ENSMUSG00000009569_ENSMUSG00000009569_Mkl2_chr16:13256480-13417529	ENSMUSG00000009569	ENSMUSG00000009569	Mkl2	chr16:13256480-13417529	protein_coding	3.91816	2.4402	4.13497	3.87126	3.68653	2.87043	3.37959	3.42152	1.80323	3.96025	3.72938	3.18514
ENSMUSG00000009575_ENSMUSG00000009575_Cbx5_chr15:103191543-103239816	ENSMUSG00000009575	ENSMUSG00000009575	Cbx5	chr15:103191543-103239816	protein_coding	6.18159	7.48801	5.49199	6.2056	6.63286	5.67297	4.85007	4.83763	6.3188	5.97924	6.21885	6.51198
ENSMUSG00000009580_ENSMUSG00000009580_Odam_chr5:87885028-87894174	ENSMUSG00000009580	ENSMUSG00000009580	Odam	chr5:87885028-87894174	protein_coding	0	0	0	0	0	0	0	0	0	0	0	0
ENSMUSG00000009585_ENSMUSG00000009585_Apobec3_chr15:79891658-79915906	ENSMUSG00000009585	ENSMUSG00000009585	Apobec3	chr15:79891658-79915906	protein_coding	8.37953	8.8142	8.32577	7.50002	9.80345	8.5778	3.77825	4.59201	4.10133	6.13671	9.96442	8.01947
ENSMUSG00000009588_ENSMUSG00000009588_St6galnac1_chr11:116765024-116775507	ENSMUSG00000009588	ENSMUSG00000009588	St6galnac1	chr11:116765024-116775507	protein_coding	0.568937	0.112297	0.348867	0.284423	0.137407	0.497279	0.0533344	0.114897	0.119365	0.151691	0.359021	0.0566897
ENSMUSG00000009596_ENSMUSG00000009596_Taf7l_chrX:134460117-134476490	ENSMUSG00000009596	ENSMUSG00000009596	Taf7l	chrX:134460117-134476490	protein_coding	0	0	0	0	0	0	0	0	0.050339	0	0	0
ENSMUSG00000009614_ENSMUSG00000009614_Sardh_chr2:27188392-27248337	ENSMUSG00000009614	ENSMUSG00000009614	Sardh	chr2:27188392-27248337	protein_coding	7.85841	9.91514	8.06721	8.66519	8.53367	12.165	6.179	2.95457	4.21143	6.96608	4.96484	5.09677
ENSMUSG00000009621_ENSMUSG00000009621_Vav2_chr2:27262103-27427033	ENSMUSG00000009621	ENSMUSG00000009621	Vav2	chr2:27262103-27427033	protein_coding	10.0038	9.81485	12.2419	11.9642	10.86	11.143	2.43102	2.37037	2.16985	3.82712	2.46844	3.80946
ENSMUSG00000009628_ENSMUSG00000009628_Tex15_chr8:33516737-33585582	ENSMUSG00000009628	ENSMUSG00000009628	Tex15	chr8:33516737-33585582	protein_coding	0.0342624	0.00855098	0.0232851	0.0284493	0	0	0	0	0	0	0	0.0682815
ENSMUSG00000009630_ENSMUSG00000009630_Ppp2cb_chr8:33599620-33619794	ENSMUSG00000009630	ENSMUSG00000009630	Ppp2cb	chr8:33599620-33619794	protein_coding	18.8326	16.8015	18.8394	18.5434	17.8358	17.9618	25.8831	29.2166	27.7937	23.6461	25.2931	24.9325
ENSMUSG00000009633_ENSMUSG00000009633_G0s2_chr1:193272160-193273188	ENSMUSG00000009633	ENSMUSG00000009633	G0s2	chr1:193272160-193273188	protein_coding	152.419	239.841	190.841	174.006	198.612	190.898	371.724	356.052	395.953	369.281	281.869	272.908
ENSMUSG00000009640_ENSMUSG00000009640_Dmap1_chr4:117674680-117682273	ENSMUSG00000009640	ENSMUSG00000009640	Dmap1	chr4:117674680-117682273	protein_coding	7.60254	7.82316	8.88674	9.67486	8.66153	8.46151	6.31065	8.27404	6.42719	9.08923	7.31548	8.40542
ENSMUSG00000009646_ENSMUSG00000009646_Pla2g12b_chr10:59403659-59421976	ENSMUSG00000009646	ENSMUSG00000009646	Pla2g12b	chr10:59403659-59421976	protein_coding	0	0	0	0	0	0	0	0	0	0.0747256	0	0
ENSMUSG00000009647_ENSMUSG00000009647_Mcu_chr10:59446983-59616692	ENSMUSG00000009647	ENSMUSG00000009647	Mcu	chr10:59446983-59616692	protein_coding	9.62855	8.80518	9.55348	9.56972	8.45264	9.3669	7.32007	6.29533	6.00487	7.50018	6.73708	7.54628
ENSMUSG00000009654_ENSMUSG00000009654_Oit3_chr10:59422957-59441778	ENSMUSG00000009654	ENSMUSG00000009654	Oit3	chr10:59422957-59441778	protein_coding	0.462297	0.16758	0.270104	0.357708	0.269209	0.195527	0.296774	0.133427	0.0346465	0.052836	0.125049	0
ENSMUSG00000009670_ENSMUSG00000009670_Tex11_chrX:100838647-101059667	ENSMUSG00000009670	ENSMUSG00000009670	Tex11	chrX:100838647-101059667	protein_coding	0	0.0294056	0.0185535	0.0907813	0.0314889	0.0230131	0	0	0	0	0.0412717	0
ENSMUSG00000009681_ENSMUSG00000009681_Bcr_chr10:75060895-75184923	ENSMUSG00000009681	ENSMUSG00000009681	Bcr	chr10:75060895-75184923	protein_coding	4.93828	5.08318	5.46583	5.9292	6.07957	5.23093	3.66227	3.14105	3.93378	3.54511	3.81241	4.22967
ENSMUSG00000009687_ENSMUSG00000009687_Fxyd5_chr7:31032721-31042481	ENSMUSG00000009687	ENSMUSG00000009687	Fxyd5	chr7:31032721-31042481	protein_coding	10.2412	10.5138	11.5298	13.0311	10.5803	10.9341	23.2892	26.3036	21.639	35.856	41.0249	43.6785
ENSMUSG00000009731_ENSMUSG00000009731_Kcnd1_chrX:7822288-7838280	ENSMUSG00000009731	ENSMUSG00000009731	Kcnd1	chrX:7822288-7838280	protein_coding	0.456104	0.255501	0.200573	0.231277	0.399419	0.234739	0.104652	0.158321	0.168589	0.130667	0.33691	0.048796
ENSMUSG00000009733_ENSMUSG00000009733_Tfcp2_chr15:100502798-100552008	ENSMUSG00000009733	ENSMUSG00000009733	Tfcp2	chr15:100502798-100552008	protein_coding	6.31979	5.43688	6.24236	6.74236	6.68851	5.41532	2.26157	2.47771	2.91595	2.74663	2.68266	3.31171
ENSMUSG00000009734_ENSMUSG00000009734_Pou6f2_chr13:18121100-18382041	ENSMUSG00000009734	ENSMUSG00000009734	Pou6f2	chr13:18121100-18382041	protein_coding	0	0	0	0	0	0	0	0	0	0	0	0
ENSMUSG00000009739_ENSMUSG00000009739_Pou6f1_chr15:100575317-100599984	ENSMUSG00000009739	ENSMUSG00000009739	Pou6f1	chr15:100575317-100599984	protein_coding	10.1369	9.1471	10.1368	10.3565	12.4542	10.6578	1.93915	2.00988	2.37165	4.51262	3.1425	3.91801
ENSMUSG00000009741_ENSMUSG00000009741_Ubp1_chr9:113930933-113977199	ENSMUSG00000009741	ENSMUSG00000009741	Ubp1	chr9:113930933-113977199	protein_coding	12.6009	13.2833	12.6486	11.9498	14.0465	12.9335	10.695	10.6373	10.1795	9.94911	10.1	10.1669
ENSMUSG00000009772_ENSMUSG00000009772_Nuak2_chr1:132316125-132333488	ENSMUSG00000009772	ENSMUSG00000009772	Nuak2	chr1:132316125-132333488	protein_coding	0.414592	0.29009	0.373536	0.455585	0.441488	0.633451	1.26001	1.10334	1.07982	1.09786	1.54953	2.13508
ENSMUSG00000009828_ENSMUSG00000009828_Ick_chr9:78109191-78172107	ENSMUSG00000009828	ENSMUSG00000009828	Ick	chr9:78109191-78172107	protein_coding	7.95619	8.42211	8.92593	7.28178	7.58479	7.12602	3.99438	3.28058	4.52995	5.49911	4.78263	4.71605
ENSMUSG00000009863_ENSMUSG00000009863_Sdhb_chr4:140961202-140979193	ENSMUSG00000009863	ENSMUSG00000009863	Sdhb	chr4:140961202-140979193	protein_coding	761.924	738.151	800.779	802.089	790.304	758.864	638.563	636.675	612.894	732.064	693.057	681.765
ENSMUSG00000009876_ENSMUSG00000009876_Cox4i2_chr2:152754172-152765037	ENSMUSG00000009876	ENSMUSG00000009876	Cox4i2	chr2:152754172-152765037	protein_coding	5.24675	4.17619	3.95762	5.28635	5.00701	3.08943	2.10687	2.70269	2.15785	4.428	3.83562	5.53938
ENSMUSG00000009894_ENSMUSG00000009894_Snap47_chr11:59407133-59451186	ENSMUSG00000009894	ENSMUSG00000009894	Snap47	chr11:59407133-59451186	protein_coding	8.43841	8.07734	9.0281	10.1557	8.57256	6.64358	11.54	12.9171	11.8824	9.48141	8.56992	7.69083
ENSMUSG00000009900_ENSMUSG00000009900_Wnt3a_chr11:59248032-59290752	ENSMUSG00000009900	ENSMUSG00000009900	Wnt3a	chr11:59248032-59290752	protein_coding	0	0	0	0	0	0	0	0	0	0	0	0
ENSMUSG00000009905_ENSMUSG00000009905_Kdsr_chr1:106720409-106759742	ENSMUSG00000009905	ENSMUSG00000009905	Kdsr	chr1:106720409-106759742	protein_coding	8.42233	7.81227	8.34159	10.1194	8.40323	8.8875	6.12599	6.63191	7.25582	5.54526	5.99727	6.50278
ENSMUSG00000009907_ENSMUSG00000009907_Vps4b_chr1:106764070-106796728	ENSMUSG00000009907	ENSMUSG00000009907	Vps4b	chr1:106764070-106796728	protein_coding	20.8892	26.1869	21.228	22.2431	25.7293	21.1418	22.0913	22.473	22.4669	22.1469	20.231	19.4131
ENSMUSG00000009927_ENSMUSG00000009927_Rps25_chr9:44407713-44410405	ENSMUSG00000009927	ENSMUSG00000009927	Rps25	chr9:44407713-44410405	protein_coding	292.754	284.923	287.321	307.197	296.314	299.218	314.441	336.787	292.597	292.113	314.003	296.398
ENSMUSG00000009941_ENSMUSG00000009941_Nxf2_chrX:134944525-134964754	ENSMUSG00000009941	ENSMUSG00000009941	Nxf2	chrX:134944525-134964754	protein_coding	0.0379118	0.130877	0.0774908	0.0327289	0.0466703	0.0664631	0	0	0	0.0412136	0	0.0391403
ENSMUSG00000009995_ENSMUSG00000009995_Taz_chrX:74281911-74290151	ENSMUSG00000009995	ENSMUSG00000009995	Taz	chrX:74281911-74290151	protein_coding	54.7573	55.203	64.1509	54.6568	61.7037	57.7154	19.8439	23.148	21.0344	28.4591	24.8804	24.5748
ENSMUSG00000010021_ENSMUSG00000010021_Kif19a_chr11:114765387-114790739	ENSMUSG00000010021	ENSMUSG00000010021	Kif19a	chr11:114765387-114790739	protein_coding	0.69665	0.325654	0.347259	0.356383	0.966059	0.474666	0.0332307	0.282527	0.20286	0.212538	0.303727	0.12721
ENSMUSG00000010025_ENSMUSG00000010025_Aldh3a2_chr11:61223416-61267464	ENSMUSG00000010025	ENSMUSG00000010025	Aldh3a2	chr11:61223416-61267464	protein_coding	12.1149	11.9585	12.9408	21.5078	19.8569	19.1654	9.03388	8.87892	9.29482	12.9716	11.3892	11.8927
ENSMUSG00000010044_ENSMUSG00000010044_Zmynd10_chr9:107547309-107551319	ENSMUSG00000010044	ENSMUSG00000010044	Zmynd10	chr9:107547309-107551319	protein_coding	0	0.136043	0.0729151	0.0446372	0	0	0.263468	0.0540437	0.168544	0.171342	0.0811143	0
ENSMUSG00000010045_ENSMUSG00000010045_Tmem115_chr9:107533944-107538656	ENSMUSG00000010045	ENSMUSG00000010045	Tmem115	chr9:107533944-107538656	protein_coding	8.66542	9.25255	9.96976	8.76148	10.2087	8.75257	12.2112	9.59625	10.7211	10.5631	9.39541	9.55615
ENSMUSG00000010047_ENSMUSG00000010047_Hyal2_chr9:107569116-107572776	ENSMUSG00000010047	ENSMUSG00000010047	Hyal2	chr9:107569116-107572776	protein_coding	9.92708	10.6034	12.3755	12.3223	15.2158	12.677	12.1187	13.0887	11.5942	13.8692	15.2143	13.6608
ENSMUSG00000010048_ENSMUSG00000010048_Ifrd2_chr9:107587717-107593038	ENSMUSG00000010048	ENSMUSG00000010048	Ifrd2	chr9:107587717-107593038	protein_coding	10.749	11.981	13.3622	12.3027	10.2398	10.9491	12.2161	11.6949	14.1144	15.6195	12.4532	15.7852
ENSMUSG00000010051_ENSMUSG00000010051_Hyal1_chr9:107576926-107581710	ENSMUSG00000010051	ENSMUSG00000010051	Hyal1	chr9:107576926-107581710	protein_coding	24.8242	22.733	26.2458	32.248	31.532	30.9407	15.5298	13.9989	15.7358	22.6296	19.9826	20.1866
ENSMUSG00000010054_ENSMUSG00000010054_Tusc2_chr9:107563254-107566108	ENSMUSG00000010054	ENSMUSG00000010054	Tusc2	chr9:107563254-107566108	protein_coding	18.9162	18.5155	21.8546	20.4057	21.6066	21.7795	18.6438	19.4159	21.6798	17.0305	18.4964	17.0291
ENSMUSG00000010057_ENSMUSG00000010057_Nprl2_chr9:107542208-107545704	ENSMUSG00000010057	ENSMUSG00000010057	Nprl2	chr9:107542208-107545704	protein_coding	13.4621	13.2473	15.0504	12.4806	13.4999	12.281	9.67971	10.9901	11.1181	9.21834	8.42774	10.1737
ENSMUSG00000010064_ENSMUSG00000010064_Slc38a3_chr9:107650638-107668968	ENSMUSG00000010064	ENSMUSG00000010064	Slc38a3	chr9:107650638-107668968	protein_coding	0.294799	0.592257	0.627639	0.644792	0.40051	0.204738	0.699586	0.893115	0.869688	0.795868	0.614483	0.403901
ENSMUSG00000010066_ENSMUSG00000010066_Cacna2d2_chr9:107399611-107529346	ENSMUSG00000010066	ENSMUSG00000010066	Cacna2d2	chr9:107399611-107529346	protein_coding	0.0666426	0.130124	0.0227467	0.0694444	0.558667	0.0214648	0.144626	0.176715	0.0174877	0.0266748	0.0192228	0.0165999
ENSMUSG00000010067_ENSMUSG00000010067_Rassf1_chr9:107551554-107562263	ENSMUSG00000010067	ENSMUSG00000010067	Rassf1	chr9:107551554-107562263	protein_coding	3.57329	4.17275	5.59683	5.51415	5.06199	4.55393	6.63721	5.58549	5.7322	7.54586	9.24816	8.87439
ENSMUSG00000010080_ENSMUSG00000010080_Epn3_chr11:94489598-94499974	ENSMUSG00000010080	ENSMUSG00000010080	Epn3	chr11:94489598-94499974	protein_coding	0.04403	0.0762611	0.287421	0.334351	0.817095	0.232451	0.127135	0.145476	0.17212	0.694793	0.232595	0.375838
ENSMUSG00000010086_ENSMUSG00000010086_Rnf112_chr11:61448441-61454131	ENSMUSG00000010086	ENSMUSG00000010086	Rnf112	chr11:61448441-61454131	protein_coding	0	0	0	0	0	0.0243339	0	0	0	0	0	0.0286644
ENSMUSG00000010095_ENSMUSG00000010095_Slc3a2_chr19:8706881-8723369	ENSMUSG00000010095	ENSMUSG00000010095	Slc3a2	chr19:8706881-8723369	protein_coding	11.7566	11.5958	12.3093	12.9223	13.8869	12.5863	66.8995	70.7529	66.1661	63.1988	57.1348	62.24
ENSMUSG00000010097_ENSMUSG00000010097_Nxf1_chr19:8757102-8770909	ENSMUSG00000010097	ENSMUSG00000010097	Nxf1	chr19:8757102-8770909	protein_coding	14.8898	14.4196	15.2551	16.164	17.678	15.4306	24.6108	22.0049	22.1505	25.2862	27.7478	27.2063
ENSMUSG00000010110_ENSMUSG00000010110_Stx5a_chr19:8741412-8756069	ENSMUSG00000010110	ENSMUSG00000010110	Stx5a	chr19:8741412-8756069	protein_coding	27.2912	23.6788	26.8612	25.4173	25.8373	24.3162	23.7186	23.6018	24.3707	22.2162	21.9035	21.6381
ENSMUSG00000010122_ENSMUSG00000010122_Slc47a1_chr11:61343400-61378345	ENSMUSG00000010122	ENSMUSG00000010122	Slc47a1	chr11:61343400-61378345	protein_coding	0.579434	0.518888	0.511008	0.0283953	0	0	0.0479319	0.309805	0.178775	0.106449	0.0258085	0.0339561
ENSMUSG00000010136_ENSMUSG00000010136_Pifo_chr3:105996956-106014646	ENSMUSG00000010136	ENSMUSG00000010136	Pifo	chr3:105996956-106014646	protein_coding	0	0	0	0.0981785	0	0	0	0	0	0	0	0
ENSMUSG00000010142_ENSMUSG00000010142_Tnfrsf13b_chr11:61126754-61149372	ENSMUSG00000010142	ENSMUSG00000010142	Tnfrsf13b	chr11:61126754-61149372	protein_coding	0.388112	0.754942	0.456552	0.297131	0.313721	0.673222	0.173683	0.297213	0.185705	0.587631	1.00913	0.878279
ENSMUSG00000010175_ENSMUSG00000010175_Prox1_chr1:190118037-190170680	ENSMUSG00000010175	ENSMUSG00000010175	Prox1	chr1:190118037-190170680	protein_coding	0.064874	0.0639859	0.059086	0.189288	0.117627	0.0552181	0.0456945	0.0542561	0.022709	0.0428387	0.114742	0.0323278
ENSMUSG00000010205_ENSMUSG00000010205_Raver1_chr9:21074167-21091988	ENSMUSG00000010205	ENSMUSG00000010205	Raver1	chr9:21074167-21091988	protein_coding	9.51258	8.84694	10.2141	10.0006	9.85056	8.134	8.69626	7.95632	7.29267	10.2393	9.93582	11.2424
ENSMUSG00000010277_ENSMUSG00000010277_2610507B11Rik_chr11:78261751-78290623	ENSMUSG00000010277	ENSMUSG00000010277	2610507B11Rik	chr11:78261751-78290623	protein_coding	56.3399	55.0356	55.7733	72.3313	66.583	68.7098	53.5943	53.9415	49.0953	50.5689	49.7832	51.0869
ENSMUSG00000010290_ENSMUSG00000010290_AI597479_chr1:43098709-43115947	ENSMUSG00000010290	ENSMUSG00000010290	AI597479	chr1:43098709-43115947	protein_coding	5.20169	6.14563	5.58325	6.12016	5.70669	4.87497	4.39588	4.09795	5.1382	4.71383	4.38507	3.93849
ENSMUSG00000010307_ENSMUSG00000010307_Tmem86a_chr7:47050639-47054776	ENSMUSG00000010307	ENSMUSG00000010307	Tmem86a	chr7:47050639-47054776	protein_coding	8.15962	8.23231	7.58028	9.62864	7.76496	5.79496	2.02067	3.05973	2.41286	3.67939	4.86921	3.69993
ENSMUSG00000010311_ENSMUSG00000010311_Optc_chr1:133897198-133907999	ENSMUSG00000010311	ENSMUSG00000010311	Optc	chr1:133897198-133907999	protein_coding	0.0850942	0.130087	0.121744	0.260218	0.109256	0.0997496	0.119281	0.104688	0.0890982	0.166281	0.143068	0
ENSMUSG00000010342_ENSMUSG00000010342_Tex14_chr11:87405064-87555823	ENSMUSG00000010342	ENSMUSG00000010342	Tex14	chr11:87405064-87555823	protein_coding	0.0181975	0	0.0248433	0.287116	0.2893	0.0307908	0.0256223	0.0736178	0.0382087	0.0145678	0.406215	0.331412
ENSMUSG00000010358_ENSMUSG00000010358_Ifi35_chr11:101448406-101458698	ENSMUSG00000010358	ENSMUSG00000010358	Ifi35	chr11:101448406-101458698	protein_coding	14.899	10.5834	14.381	14.7354	14.8679	16.1232	8.53805	9.2268	7.42983	12.7353	12.9701	15.68
ENSMUSG00000010362_ENSMUSG00000010362_Rdm1_chr11:101627194-101636100	ENSMUSG00000010362	ENSMUSG00000010362	Rdm1	chr11:101627194-101636100	protein_coding	25.0489	22.2349	19.4862	25.9859	22.8866	21.264	12.3877	8.41119	7.01181	7.93746	6.83955	7.74777
ENSMUSG00000010376_ENSMUSG00000010376_Nedd8_chr14:55662264-55671906	ENSMUSG00000010376	ENSMUSG00000010376	Nedd8	chr14:55662264-55671906	protein_coding	94.2807	89.2623	94.7749	91.3789	103.61	101.271	114.613	125.207	105.269	107.594	105.338	109.536
ENSMUSG00000010392_ENSMUSG00000010392_Gosr1_chr11:76726601-76763579	ENSMUSG00000010392	ENSMUSG00000010392	Gosr1	chr11:76726601-76763579	protein_coding	16.6236	16.2583	14.4994	15.3029	15.3019	15.5453	14.8117	18.6757	18.2633	14.2421	17.2266	15.7278
ENSMUSG00000010406_ENSMUSG00000010406_Mrpl52_chr14:54426908-54429750	ENSMUSG00000010406	ENSMUSG00000010406	Mrpl52	chr14:54426908-54429750	protein_coding	91.0371	94.9788	97.9839	97.8168	89.9819	96.9421	90.5583	99.2199	93.8269	117.098	109.026	112.707
ENSMUSG00000010435_ENSMUSG00000010435_Spaca7_chr8:12573048-12600738	ENSMUSG00000010435	ENSMUSG00000010435	Spaca7	chr8:12573048-12600738	protein_coding	0	0	0	0	0	0	0	0	0	0	0	0
ENSMUSG00000010453_ENSMUSG00000010453_Kansl3_chr1:36335729-36369181	ENSMUSG00000010453	ENSMUSG00000010453	Kansl3	chr1:36335729-36369181	protein_coding	22.6803	21.4586	25.5521	26.4724	25.0411	24.9963	23.0921	20.2468	21.5835	23.1384	22.3894	24.3269
ENSMUSG00000010461_ENSMUSG00000010461_Eya4_chr10:23104167-23349895	ENSMUSG00000010461	ENSMUSG00000010461	Eya4	chr10:23104167-23349895	protein_coding	0.0505297	0.0213655	0.072828	0.0889509	0	0.0641197	0.0600944	0.129492	0.0672172	0.0854345	0.162438	0.15157
ENSMUSG00000010476_ENSMUSG00000010476_Ebf3_chr7:137193672-137314445	ENSMUSG00000010476	ENSMUSG00000010476	Ebf3	chr7:137193672-137314445	protein_coding	10.3892	10.7449	10.217	10.9463	13.1539	11.6683	5.55999	5.4099	5.81569	4.8944	5.38165	4.58649
ENSMUSG00000010492_ENSMUSG00000010492_Gm16119_chr2:181578479-181585170	ENSMUSG00000010492	ENSMUSG00000010492	Gm16119	chr2:181578479-181585170		0.411795	0.425826	1.24709	0.796046	0.828556	0.931777	1.27001	0.919083	2.00148	1.50914	0.928419	0.592645
ENSMUSG00000010505_ENSMUSG00000010505_Myt1_chr2:181763331-181827797	ENSMUSG00000010505	ENSMUSG00000010505	Myt1	chr2:181763331-181827797	protein_coding	0.021366	0	0.01458	0	0	0.0180755	0	0	0	0	0	0
ENSMUSG00000010517_ENSMUSG00000010517_Faf1_chr4:109676587-109963960	ENSMUSG00000010517	ENSMUSG00000010517	Faf1	chr4:109676587-109963960	protein_coding	12.7567	10.2697	10.933	11.3657	9.34939	10.1892	15.2032	14.4226	13.4808	10.2329	12.7387	11.5564
ENSMUSG00000010529_ENSMUSG00000010529_Gm266_chr12:111484610-111485823	ENSMUSG00000010529	ENSMUSG00000010529	Gm266	chr12:111484610-111485823	protein_coding	0.49385	0.139388	0.223372	0.342599	0.297702	0.278361	0.0576983	0.165626	0.086191	0.0657101	0.124452	0.245952
ENSMUSG00000010538_ENSMUSG00000010538_Tsacc_chr3:88282756-88296999	ENSMUSG00000010538	ENSMUSG00000010538	Tsacc	chr3:88282756-88296999	protein_coding	1.97117	3.70857	5.61588	3.81091	3.79802	4.41679	3.3412	2.80739	4.56236	3.03513	3.2885	3.45136
ENSMUSG00000010554_ENSMUSG00000010554_Mettl16_chr11:74770829-74828525	ENSMUSG00000010554	ENSMUSG00000010554	Mettl16	chr11:74770829-74828525	protein_coding	5.39401	4.99217	4.42719	4.90774	6.84736	5.8247	9.87762	8.17896	11.015	8.18297	9.96804	7.82625
ENSMUSG00000010592_ENSMUSG00000010592_Dazl_chr17:50279393-50293599	ENSMUSG00000010592	ENSMUSG00000010592	Dazl	chr17:50279393-50293599	protein_coding	0	0	0	0	0.054911	0	0.0213186	0	0	0	0	0.0301995
ENSMUSG00000010601_ENSMUSG00000010601_Apol7a_chr15:77388220-77399110	ENSMUSG00000010601	ENSMUSG00000010601	Apol7a	chr15:77388220-77399110	protein_coding	0	0.114951	0	0	0	0	0	0	0	0	0	0
ENSMUSG00000010607_ENSMUSG00000010607_Pigyl_chr9:22156845-22158358	ENSMUSG00000010607	ENSMUSG00000010607	Pigyl	chr9:22156845-22158358	protein_coding	29.4977	24.4726	29.786	27.9164	30.7028	29.7395	19.015	16.4464	21.0712	21.8885	18.2682	21.8323
ENSMUSG00000010608_ENSMUSG00000010608_Rbm25_chr12:83631235-83683123	ENSMUSG00000010608	ENSMUSG00000010608	Rbm25	chr12:83631235-83683123	protein_coding	29.2971	28.5603	26.3807	32.1493	25.6364	28.9255	40.1866	41.3761	33.6843	43.4833	37.3019	41.4752
ENSMUSG00000010608_ENSMUSG00000010608_Rbm25_chr12:83632425-83633833	ENSMUSG00000010608	ENSMUSG00000010608	Rbm25	chr12:83632425-83633833	protein_coding	0.0689626	0.116753	0.140543	0.172274	0.187164	0.233258	0.145158	0.277842	0	0.110174	0.104324	0
ENSMUSG00000010609_ENSMUSG00000010609_Psen2_chr1:180227003-180263438	ENSMUSG00000010609	ENSMUSG00000010609	Psen2	chr1:180227003-180263438	protein_coding	10.889	8.97046	11.5861	12.8922	11.369	10.7597	6.87771	7.0587	8.14343	7.04558	5.80628	5.79384
ENSMUSG00000010651_ENSMUSG00000010651_Acaa1b_chr9:119148022-119157093	ENSMUSG00000010651	ENSMUSG00000010651	Acaa1b	chr9:119148022-119157093	protein_coding	18.2014	21.2146	21.3393	30.6352	28.8302	32.7654	19.1817	24.4722	24.4674	16.1055	13.6888	15.5222
ENSMUSG00000010660_ENSMUSG00000010660_Plcd1_chr9:119071526-119093496	ENSMUSG00000010660	ENSMUSG00000010660	Plcd1	chr9:119071526-119093496	protein_coding	7.83375	6.82688	8.36731	8.87302	9.43053	7.94603	5.79542	6.88512	7.0093	6.3484	6.16411	6.96112
ENSMUSG00000010663_ENSMUSG00000010663_Fads1_chr19:10182887-10196870	ENSMUSG00000010663	ENSMUSG00000010663	Fads1	chr19:10182887-10196870	protein_coding	6.14892	6.17099	6.40466	6.61299	7.25912	6.08667	3.32138	2.86259	2.99913	4.00207	3.24733	3.12731
ENSMUSG00000010721_ENSMUSG00000010721_Lmbr1_chr5:29229813-29378390	ENSMUSG00000010721	ENSMUSG00000010721	Lmbr1	chr5:29229813-29378390	protein_coding	2.0582	1.82953	2.03374	2.27556	1.51469	1.39899	1.38713	1.38781	1.47749	1.33789	1.55973	1.61288
ENSMUSG00000010751_ENSMUSG00000010751_Tnfrsf22_chr7:143634807-143649661	ENSMUSG00000010751	ENSMUSG00000010751	Tnfrsf22	chr7:143634807-143649661	protein_coding	0.920727	0.505316	0.805029	0.596784	0.869315	0.894209	0.79962	0.425119	0.727914	1.0719	1.03406	0.872095
ENSMUSG00000010755_ENSMUSG00000010755_Cars_chr7:143557229-143600090	ENSMUSG00000010755	ENSMUSG00000010755	Cars	chr7:143557229-143600090	protein_coding	8.11088	7.4179	7.88543	6.76451	7.19386	6.9203	10.2281	9.43197	10.0078	15.5303	13.8034	13.8297
ENSMUSG00000010760_ENSMUSG00000010760_Phlda2_chr7:143501544-143502541	ENSMUSG00000010760	ENSMUSG00000010760	Phlda2	chr7:143501544-143502541	protein_coding	0	0	0	0	0	0	0	0	0	0	0	0
ENSMUSG00000010796_ENSMUSG00000010796_Asz1_chr6:18050963-18109061	ENSMUSG00000010796	ENSMUSG00000010796	Asz1	chr6:18050963-18109061	protein_coding	0	0	0	0	0	0	0	0	0	0	0	0
ENSMUSG00000010797_ENSMUSG00000010797_Wnt2_chr6:17988939-18030585	ENSMUSG00000010797	ENSMUSG00000010797	Wnt2	chr6:17988939-18030585	protein_coding	0.445223	0.228663	0.220445	0.314898	0.256556	0.182702	0.837617	0.554131	0.509426	0.873792	0.819229	0.807521
ENSMUSG00000010803_ENSMUSG00000010803_Gabra1_chr11:42130938-42182930	ENSMUSG00000010803	ENSMUSG00000010803	Gabra1	chr11:42130938-42182930	protein_coding	0.410065	0.375555	0.239954	0.300668	0.533631	0.341065	0.0781513	0.0935596	0.865109	0.652719	0.900153	0.400221
ENSMUSG00000010825_ENSMUSG00000010825_Grid2ip_chr5:143357337-143392152	ENSMUSG00000010825	ENSMUSG00000010825	Grid2ip	chr5:143357337-143392152	protein_coding	0	0	0	0	0	0	0	0	0	0	0	0.159182
ENSMUSG00000010830_ENSMUSG00000010830_Kdelr3_chr15:79516407-79527739	ENSMUSG00000010830	ENSMUSG00000010830	Kdelr3	chr15:79516407-79527739	protein_coding	1.78413	2.32344	1.9579	3.25699	2.60732	2.43706	1.49255	1.93529	2.01309	2.02814	1.60902	1.50386
ENSMUSG00000010841_ENSMUSG00000010841_1700006E09Rik_chr11:101984278-101992264	ENSMUSG00000010841	ENSMUSG00000010841	1700006E09Rik	chr11:101984278-101992264	protein_coding	0	0	0	0	0	0	0	0	0	0.163565	0	0
ENSMUSG00000010911_ENSMUSG00000010911_Apip_chr2:103073674-103092644	ENSMUSG00000010911	ENSMUSG00000010911	Apip	chr2:103073674-103092644	protein_coding	26.0061	27.6565	23.7885	25.0731	23.9519	24.934	20.1233	20.755	20.89	17.7346	17.0801	16.5437
ENSMUSG00000010914_ENSMUSG00000010914_Pdhx_chr2:103021074-103073513	ENSMUSG00000010914	ENSMUSG00000010914	Pdhx	chr2:103021074-103073513	protein_coding	67.3174	71.343	70.976	60.3339	62.6618	69.3672	82.7123	81.7373	79.7299	67.3434	66.9568	64.0967
ENSMUSG00000010936_ENSMUSG00000010936_Vac14_chr8:110618637-110720396	ENSMUSG00000010936	ENSMUSG00000010936	Vac14	chr8:110618637-110720396	protein_coding	4.84818	5.1938	5.93053	5.72972	5.2175	5.09543	7.87539	6.88812	6.35171	5.94827	6.14296	6.23655
ENSMUSG00000011008_ENSMUSG00000011008_Mcoln2_chr3:146149832-146195513	ENSMUSG00000011008	ENSMUSG00000011008	Mcoln2	chr3:146149832-146195513	protein_coding	0	0.0909272	0.249749	0.14818	0.0328203	0.153511	0.525778	0.3745	0.288309	0.695267	0.824018	1.42863
ENSMUSG00000011034_ENSMUSG00000011034_Slc5a1_chr5:33104218-33162872	ENSMUSG00000011034	ENSMUSG00000011034	Slc5a1	chr5:33104218-33162872	protein_coding	0	0	0	0	0	0	0	0	0	0	0	0
ENSMUSG00000011052_ENSMUSG00000011052_1700049J03Rik_chr17:26554253-26561496	ENSMUSG00000011052	ENSMUSG00000011052	1700049J03Rik	chr17:26554253-26561496		0	0	0.25634	0	0	0	0	0	0	0	0	0
ENSMUSG00000011096_ENSMUSG00000011096_Akt1s1_chr7:44848990-44855421	ENSMUSG00000011096	ENSMUSG00000011096	Akt1s1	chr7:44848990-44855421	protein_coding	28.2341	26.1733	36.126	36.6443	40.9586	31.1856	38.452	42.0388	41.5859	34.7591	28.512	35.7598
ENSMUSG00000011114_ENSMUSG00000011114_Tbrg1_chr9:37649181-37657312	ENSMUSG00000011114	ENSMUSG00000011114	Tbrg1	chr9:37649181-37657312	protein_coding	15.2628	13.671	14.2327	14.6732	15.6962	13.4367	12.6089	16.2674	12.2283	17.1967	17.5438	17.618
ENSMUSG00000011118_ENSMUSG00000011118_Panx3_chr9:37659901-37669222	ENSMUSG00000011118	ENSMUSG00000011118	Panx3	chr9:37659901-37669222	protein_coding	0	0	0	0	0	0	0	0	0	0	0	0
ENSMUSG00000011148_ENSMUSG00000011148_Adssl1_chr12:112620044-112641354	ENSMUSG00000011148	ENSMUSG00000011148	Adssl1	chr12:112620044-112641354	protein_coding	37.1018	33.9819	46.1788	46.3706	42.2301	37.6651	22.9326	31.5667	27.793	28.2554	21.5648	25.5209
ENSMUSG00000011154_ENSMUSG00000011154_1700026D08Rik_chr7:83774100-83794880	ENSMUSG00000011154	ENSMUSG00000011154	1700026D08Rik	chr7:83774100-83794880	protein_coding	0	0	0	0	0.0664088	0.0620797	0	0	0	0	0.167043	0
ENSMUSG00000011158_ENSMUSG00000011158_Brf1_chr12:112959861-113000621	ENSMUSG00000011158	ENSMUSG00000011158	Brf1	chr12:112959861-113000621	protein_coding	9.72619	9.43713	10.2667	10.9238	11.0501	9.65823	10.0209	10.154	9.72726	9.83738	9.78105	7.87657
ENSMUSG00000011171_ENSMUSG00000011171_Vipr2_chr12:116077725-116146261	ENSMUSG00000011171	ENSMUSG00000011171	Vipr2	chr12:116077725-116146261	protein_coding	0	0.116093	0.0356056	0.117975	0.215349	0.0220797	0.0956476	0.354229	0.0273924	0.0208873	0	0
ENSMUSG00000011179_ENSMUSG00000011179_Odc1_chr12:17544872-17551502	ENSMUSG00000011179	ENSMUSG00000011179	Odc1	chr12:17544872-17551502	protein_coding	14.9938	16.3877	16.5762	17.7516	15.8159	16.5777	35.4789	40.9045	36.6937	34.6749	37.9501	40.4037
ENSMUSG00000011254_ENSMUSG00000011254_Thg1l_chr11:45946842-45955494	ENSMUSG00000011254	ENSMUSG00000011254	Thg1l	chr11:45946842-45955494	protein_coding	4.32266	2.12755	4.1886	2.67075	3.27153	2.96453	4.87381	6.46982	3.74431	4.91529	5.99643	4.77495
ENSMUSG00000011256_ENSMUSG00000011256_Adam19_chr11:46055991-46147343	ENSMUSG00000011256	ENSMUSG00000011256	Adam19	chr11:46055991-46147343	protein_coding	1.27542	1.28824	1.38447	1.9697	2.09326	1.71065	1.01165	0.97842	1.22657	1.55422	1.5903	1.15068
ENSMUSG00000011257_ENSMUSG00000011257_Pabpc4_chr4:123262350-123298925	ENSMUSG00000011257	ENSMUSG00000011257	Pabpc4	chr4:123262350-123298925	protein_coding	35.1766	35.1693	36.7053	34.4124	32.3561	32.7746	51.1848	53.0874	53.2081	43.2261	42.8743	42.2077
ENSMUSG00000011263_ENSMUSG00000011263_Exoc3l2_chr7:19489055-19496760	ENSMUSG00000011263	ENSMUSG00000011263	Exoc3l2	chr7:19489055-19496760	protein_coding	0.290915	0.4219	0.424583	0.588621	0.48925	0.316366	0.175274	0.293667	0.26154	0.199419	0.377597	0.248454
ENSMUSG00000011267_ENSMUSG00000011267_Zfp296_chr7:19577286-19580656	ENSMUSG00000011267	ENSMUSG00000011267	Zfp296	chr7:19577286-19580656	protein_coding	0.125222	0.264962	0.425586	0.62571	0.679862	0.423576	0.307637	0.0630956	0.131232	0.600328	0.236846	0.43662
ENSMUSG00000011305_ENSMUSG00000011305_Plin5_chr17:56111600-56117596	ENSMUSG00000011305	ENSMUSG00000011305	Plin5	chr17:56111600-56117596	protein_coding	84.398	80.8254	91.8267	87.9245	89.4026	85.0127	91.6237	95.8538	102.327	95.4316	91.9209	92.9069
ENSMUSG00000011306_ENSMUSG00000011306_Sugp1_chr8:70042812-70071953	ENSMUSG00000011306	ENSMUSG00000011306	Sugp1	chr8:70042812-70071953	protein_coding	8.2872	8.39244	9.87917	8.66401	9.56174	7.85214	6.94617	8.52765	5.7255	8.3807	7.75326	8.21767
ENSMUSG00000011349_ENSMUSG00000011349_Dmrtc2_chr7:24870056-24877651	ENSMUSG00000011349	ENSMUSG00000011349	Dmrtc2	chr7:24870056-24877651	protein_coding	0	0	0	0	0	0	0	0	0	0	0	0
ENSMUSG00000011350_ENSMUSG00000011350_Gm5893_chr7:24818794-24840275	ENSMUSG00000011350	ENSMUSG00000011350	Gm5893	chr7:24818794-24840275		0	0	0	0	0	0	0	0	0	0	0	0
ENSMUSG00000011382_ENSMUSG00000011382_Dhdh_chr7:45472955-45488805	ENSMUSG00000011382	ENSMUSG00000011382	Dhdh	chr7:45472955-45488805	protein_coding	73.4436	73.537	71.3641	66.1355	66.23	67.7311	38.6989	35.2485	40.665	43.3815	33.2848	35.4358
ENSMUSG00000011427_ENSMUSG00000011427_Zfp790_chr7:29816071-29832042	ENSMUSG00000011427	ENSMUSG00000011427	Zfp790	chr7:29816071-29832042	protein_coding	3.32162	3.3125	2.84375	3.66955	3.85713	3.32536	3.1121	2.70937	3.08417	3.14047	2.99869	3.51158
ENSMUSG00000011463_ENSMUSG00000011463_Cpb1_chr3:20248263-20275733	ENSMUSG00000011463	ENSMUSG00000011463	Cpb1	chr3:20248263-20275733	protein_coding	0	0	0.0449994	0	0	0	0	0	0	0	0	0
ENSMUSG00000011486_ENSMUSG00000011486_Slc25a41_chr17:57032772-57041654	ENSMUSG00000011486	ENSMUSG00000011486	Slc25a41	chr17:57032772-57041654	protein_coding	0.0813396	0	0	0	0	0.0725258	0	0	0	0.0684735	0	0
ENSMUSG00000011589_ENSMUSG00000011589_Fsd1_chr17:55986510-55996881	ENSMUSG00000011589	ENSMUSG00000011589	Fsd1	chr17:55986510-55996881	protein_coding	0.0537632	0	0	0.0447817	0	0.0909374	0	0	0.056363	0	0	0.0535636
ENSMUSG00000011632_ENSMUSG00000011632_Pinlyp_chr7:24541698-24546071	ENSMUSG00000011632	ENSMUSG00000011632	Pinlyp	chr7:24541698-24546071	protein_coding	0.301786	0.127961	0.101715	0	0	0	0	0	0	0	0	0
ENSMUSG00000011658_ENSMUSG00000011658_Fuz_chr7:44896078-44902631	ENSMUSG00000011658	ENSMUSG00000011658	Fuz	chr7:44896078-44902631	protein_coding	16.9878	11.7998	17.0598	14.3095	14.1962	12.9129	9.13505	8.00707	6.8625	8.4836	9.53448	10.7866
ENSMUSG00000011751_ENSMUSG00000011751_Sptbn4_chr7:27356382-27447686	ENSMUSG00000011751	ENSMUSG00000011751	Sptbn4	chr7:27356382-27447686	protein_coding	0.0485793	0.0246405	0.025026	0.0611252	0.0088085	0.0246461	0.0205317	0	0.0192391	0.0146703	0	0
ENSMUSG00000011752_ENSMUSG00000011752_Pgam1_chr19:41911870-41918664	ENSMUSG00000011752	ENSMUSG00000011752	Pgam1	chr19:41911870-41918664	protein_coding	261.396	259.269	279.447	276.199	263.921	275.589	315.069	332.612	313.128	324.15	300.565	305.387
ENSMUSG00000011831_ENSMUSG00000011831_Evi5_chr5:107744794-107875107	ENSMUSG00000011831	ENSMUSG00000011831	Evi5	chr5:107744794-107875107	protein_coding	5.86316	6.69505	4.94274	7.1806	5.8987	5.66295	6.89143	6.52336	5.9583	6.40343	6.96017	7.77289
ENSMUSG00000011832_ENSMUSG00000011832_Evi5l_chr8:4166566-4211257	ENSMUSG00000011832	ENSMUSG00000011832	Evi5l	chr8:4166566-4211257	protein_coding	8.89437	9.16506	11.8377	12.58	10.4751	11.6135	9.31535	9.2116	7.73837	8.25861	6.74104	7.97971
ENSMUSG00000011837_ENSMUSG00000011837_Snapc2_chr8:4253101-4256219	ENSMUSG00000011837	ENSMUSG00000011837	Snapc2	chr8:4253101-4256219	protein_coding	6.91334	5.42191	6.89737	7.60601	6.14073	6.59709	3.82847	2.93994	4.7856	3.39529	4.41448	3.60153
ENSMUSG00000011877_ENSMUSG00000011877_Git1_chr11:77493561-77507786	ENSMUSG00000011877	ENSMUSG00000011877	Git1	chr11:77493561-77507786	protein_coding	10.8439	11.6877	13.9698	14.5399	16.2582	13.0053	16.9291	17.1707	14.6749	18.2714	21.4707	21.0454
ENSMUSG00000011884_ENSMUSG00000011884_Gltp_chr5:114669402-114690984	ENSMUSG00000011884	ENSMUSG00000011884	Gltp	chr5:114669402-114690984	protein_coding	15.2646	13.4286	17.1571	16.8435	14.8096	14.2813	10.5206	10.1881	10.4554	14.1857	12.6926	11.1468
ENSMUSG00000011958_ENSMUSG00000011958_Bnip2_chr9:69989465-70008317	ENSMUSG00000011958	ENSMUSG00000011958	Bnip2	chr9:69989465-70008317	protein_coding	37.154	35.299	39.3998	41.7318	46.4004	42.0248	52.0477	52.1559	59.9885	50.0888	52.4779	59.8368
ENSMUSG00000011960_ENSMUSG00000011960_Ccnt1_chr15:98538688-98570923	ENSMUSG00000011960	ENSMUSG00000011960	Ccnt1	chr15:98538688-98570923	protein_coding	4.41814	4.64092	4.39544	4.68923	4.66332	4.93723	7.09802	5.85842	6.34587	5.92589	4.94213	6.60113
ENSMUSG00000012017_ENSMUSG00000012017_Scarf2_chr16:17797281-17808287	ENSMUSG00000012017	ENSMUSG00000012017	Scarf2	chr16:17797281-17808287	protein_coding	1.01776	0.951324	1.42485	2.03117	1.72294	1.47271	0.791474	1.10982	1.26487	1.54318	1.60288	1.20102
ENSMUSG00000012042_ENSMUSG00000012042_4930579F01Rik_chr3:138164134-138186713	ENSMUSG00000012042	ENSMUSG00000012042	4930579F01Rik	chr3:138164134-138186713	protein_coding	0	0	0	0	0	0	0	0	0	0	0	0
ENSMUSG00000012076_ENSMUSG00000012076_Brms1l_chr12:55836365-55869735	ENSMUSG00000012076	ENSMUSG00000012076	Brms1l	chr12:55836365-55869735	protein_coding	5.72675	5.91388	5.69858	6.38191	6.23731	5.64653	5.31183	4.89682	4.79174	6.07074	4.76273	5.95141
ENSMUSG00000012114_ENSMUSG00000012114_Med15_chr16:17651220-17722930	ENSMUSG00000012114	ENSMUSG00000012114	Med15	chr16:17651220-17722930	protein_coding	8.61326	8.86274	10.5733	10.1941	11.0347	9.50766	9.27853	9.23537	7.46143	10.8729	10.5185	11.8282
ENSMUSG00000012117_ENSMUSG00000012117_Dhdds_chr4:133969027-134000918	ENSMUSG00000012117	ENSMUSG00000012117	Dhdds	chr4:133969027-134000918	protein_coding	11.5545	10.6751	10.8094	10.768	13.2768	10.6221	8.88596	8.62177	8.29653	6.86994	7.77621	7.91899
ENSMUSG00000012123_ENSMUSG00000012123_Aim1l_chr4:134065911-134092504	ENSMUSG00000012123	ENSMUSG00000012123	Aim1l	chr4:134065911-134092504	protein_coding	1.37641	1.23909	1.16751	0.0550977	0.930426	1.2849	0.12904	0.412335	0	0	0.0250396	0
ENSMUSG00000012126_ENSMUSG00000012126_Ubxn11_chr4:134102569-134127593	ENSMUSG00000012126	ENSMUSG00000012126	Ubxn11	chr4:134102569-134127593	protein_coding	1.7309	1.42924	1.95057	1.20486	1.07434	0.97208	0.550612	0.991855	0.485223	1.5553	0.264049	0.912893
ENSMUSG00000012187_ENSMUSG00000012187_Mogat1_chr1:78510990-78538173	ENSMUSG00000012187	ENSMUSG00000012187	Mogat1	chr1:78510990-78538173	protein_coding	4.41602	4.25905	4.73429	5.77566	8.87089	6.99777	5.91559	5.92629	6.01335	2.69437	5.02077	1.01917
ENSMUSG00000012211_ENSMUSG00000012211_Tex22_chr12:113074501-113088917	ENSMUSG00000012211	ENSMUSG00000012211	Tex22	chr12:113074501-113088917	protein_coding	0	0	0.060809	0	0	0	0	0.156609	0	0	0	0
ENSMUSG00000012282_ENSMUSG00000012282_Wnt8a_chr18:34542312-34548273	ENSMUSG00000012282	ENSMUSG00000012282	Wnt8a	chr18:34542312-34548273	protein_coding	0	0	0	0	0	0	0	0	0	0	0	0
ENSMUSG00000012296_ENSMUSG00000012296_Tjap1_chr17:46257850-46283026	ENSMUSG00000012296	ENSMUSG00000012296	Tjap1	chr17:46257850-46283026	protein_coding	5.46112	3.61445	5.75884	4.2396	4.90196	3.73946	7.07437	6.28273	6.21099	6.48311	5.84329	6.47557
ENSMUSG00000012350_ENSMUSG00000012350_Ehf_chr2:103263432-103303278	ENSMUSG00000012350	ENSMUSG00000012350	Ehf	chr2:103263432-103303278	protein_coding	0.023759	0.217051	0	0.0198015	0	0.0164568	0	0	0.0204207	0.155091	0	0
ENSMUSG00000012396_ENSMUSG00000012396_Nanog_chr6:122707488-122714633	ENSMUSG00000012396	ENSMUSG00000012396	Nanog	chr6:122707488-122714633	protein_coding	0.0463189	0	0.0946617	0	0.0419211	0	0.0807402	0	0.0485581	0	0	0
ENSMUSG00000012405_ENSMUSG00000012405_Rpl15_chr14:18267822-18271391	ENSMUSG00000012405	ENSMUSG00000012405	Rpl15	chr14:18267822-18271391	protein_coding	146.241	134.985	153.782	142.589	147.291	138.052	163.909	172.445	166.574	185.238	176.092	185.289
ENSMUSG00000012422_ENSMUSG00000012422_Tmem167_chr13:90089122-90143907	ENSMUSG00000012422	ENSMUSG00000012422	Tmem167	chr13:90089122-90143907	protein_coding	3.27369	3.6243	2.95353	2.87007	2.9066	2.74529	5.39226	4.69845	4.51069	3.40194	4.04884	3.69595
ENSMUSG00000012428_ENSMUSG00000012428_Steap4_chr5:7960471-7982213	ENSMUSG00000012428	ENSMUSG00000012428	Steap4	chr5:7960471-7982213	protein_coding	89.1369	90.8982	68.8623	113.615	89.6175	116.501	83.8662	61.6031	69.0144	97.9444	105.737	140.221
ENSMUSG00000012429_ENSMUSG00000012429_Mplkip_chr13:17695412-17699105	ENSMUSG00000012429	ENSMUSG00000012429	Mplkip	chr13:17695412-17699105	protein_coding	2.05104	2.58804	2.11991	1.38687	2.60409	1.77762	1.37152	1.78308	1.48166	1.8426	1.286	1.77573
ENSMUSG00000012443_ENSMUSG00000012443_Kif11_chr19:37376402-37421859	ENSMUSG00000012443	ENSMUSG00000012443	Kif11	chr19:37376402-37421859	protein_coding	0.179766	0.379999	0.196338	0.269712	0.244394	0.121669	0.101247	0.0727255	0.169853	0.100738	0.190718	0.161235
ENSMUSG00000012483_ENSMUSG00000012483_Rpa3_chr6:8255935-8259173	ENSMUSG00000012483	ENSMUSG00000012483	Rpa3	chr6:8255935-8259173	protein_coding	18.3746	18.0099	15.3546	16.4459	19.4336	21.3924	8.19407	5.15319	7.62892	5.24271	4.82586	5.13762
ENSMUSG00000012519_ENSMUSG00000012519_Mlkl_chr8:111311796-111338177	ENSMUSG00000012519	ENSMUSG00000012519	Mlkl	chr8:111311796-111338177	protein_coding	4.74548	2.43225	2.45414	2.88754	3.94813	3.46004	1.77144	3.12795	2.20371	2.86487	4.89551	4.10416
ENSMUSG00000012520_ENSMUSG00000012520_Phox2b_chr5:67094396-67099301	ENSMUSG00000012520	ENSMUSG00000012520	Phox2b	chr5:67094396-67099301	protein_coding	0	0	0	0	0	0	0	0	0	0	0	0
ENSMUSG00000012535_ENSMUSG00000012535_Tnpo3_chr6:29540826-29609887	ENSMUSG00000012535	ENSMUSG00000012535	Tnpo3	chr6:29540826-29609887	protein_coding	14.2983	13.8431	14.4855	15.6361	14.7354	14.9114	18.6056	17.9976	19.9258	17.0377	17.9574	16.7616
ENSMUSG00000012609_ENSMUSG00000012609_Ttll5_chr12:85824658-86061893	ENSMUSG00000012609	ENSMUSG00000012609	Ttll5	chr12:85824658-86061893	protein_coding	3.51557	3.1992	3.80575	4.49709	4.81226	4.50542	2.10994	2.15547	2.55465	2.79754	1.74713	2.3121
ENSMUSG00000012640_ENSMUSG00000012640_Zfp715_chr7:43296196-43313294	ENSMUSG00000012640	ENSMUSG00000012640	Zfp715	chr7:43296196-43313294	protein_coding	4.07338	4.5764	5.32734	5.51759	5.98499	4.64662	6.54788	6.45233	8.42673	4.44039	3.98385	6.81047
ENSMUSG00000012705_ENSMUSG00000012705_Retn_chr8:3655769-3660110	ENSMUSG00000012705	ENSMUSG00000012705	Retn	chr8:3655769-3660110	protein_coding	47.4876	46.5613	56.5388	71.55	59.1523	76.2695	69.9593	81.4883	78.2462	44.3752	41.7158	43.5282
ENSMUSG00000012777_ENSMUSG00000012777_Acpt_chr7:44252147-44257378	ENSMUSG00000012777	ENSMUSG00000012777	Acpt	chr7:44252147-44257378	protein_coding	0.0580533	0	0	0	0	0	0	0	0	0.0927892	0.0439282	0.0578358
ENSMUSG00000012819_ENSMUSG00000012819_Cdh23_chr10:60302747-60696490	ENSMUSG00000012819	ENSMUSG00000012819	Cdh23	chr10:60302747-60696490	protein_coding	4.14466	5.27361	3.52951	4.67346	4.60332	5.13049	0.381346	0.966307	0.479743	0.675613	0.719732	0.593286
ENSMUSG00000012848_ENSMUSG00000012848_Rps5_chr7:12922289-12926686	ENSMUSG00000012848	ENSMUSG00000012848	Rps5	chr7:12922289-12926686	protein_coding	263.082	220.824	287.798	283.653	274.94	254.904	289.746	294.225	275.064	311.232	299.805	322.387
ENSMUSG00000012889_ENSMUSG00000012889_Podnl1_chr8:84125988-84132527	ENSMUSG00000012889	ENSMUSG00000012889	Podnl1	chr8:84125988-84132527	protein_coding	0	0.128881	0.0604699	0.073903	0.026781	0.0750192	0.107084	0	0	0.10533	0	0.029457
ENSMUSG00000013033_ENSMUSG00000013033_Lphn1_chr8:83900104-83941954	ENSMUSG00000013033	ENSMUSG00000013033	Lphn1	chr8:83900104-83941954	protein_coding	2.89504	3.06418	2.42994	4.13754	3.88261	2.85258	1.83205	2.25735	2.03279	4.68101	2.22506	2.29825
ENSMUSG00000013076_ENSMUSG00000013076_Amotl1_chr9:14541965-14615483	ENSMUSG00000013076	ENSMUSG00000013076	Amotl1	chr9:14541965-14615483	protein_coding	16.0221	15.5336	17.4758	17.1154	17.3639	15.2986	7.71574	7.58771	7.91228	9.28309	9.20449	10.2392
ENSMUSG00000013083_ENSMUSG00000013083_2200002J24Rik_chr7:30699782-30700380	ENSMUSG00000013083	ENSMUSG00000013083	2200002J24Rik	chr7:30699782-30700380	protein_coding	0	0	0	0	0	0	0	0	0	0	0.470138	0
ENSMUSG00000013089_ENSMUSG00000013089_Etv5_chr16:22381308-22439719	ENSMUSG00000013089	ENSMUSG00000013089	Etv5	chr16:22381308-22439719	protein_coding	0.93094	0.709077	1.09648	1.702	1.6648	1.21912	0.78221	1.12922	1.03926	1.12705	1.83253	1.42941
ENSMUSG00000013091_ENSMUSG00000013091_Tmem190_chr7:4782939-4784341	ENSMUSG00000013091	ENSMUSG00000013091	Tmem190	chr7:4782939-4784341	protein_coding	0	0	0	0	0	0.183954	0	0	0	0.172931	0	0.216771
ENSMUSG00000013150_ENSMUSG00000013150_Gfod2_chr8:105713853-105758664	ENSMUSG00000013150	ENSMUSG00000013150	Gfod2	chr8:105713853-105758664	protein_coding	4.44662	2.84829	4.33387	8.545	5.54035	3.86479	2.57739	2.89647	2.4575	3.70626	3.03988	3.92977
ENSMUSG00000013155_ENSMUSG00000013155_Enkd1_chr8:105703654-105707933	ENSMUSG00000013155	ENSMUSG00000013155	Enkd1	chr8:105703654-105707933	protein_coding	0.544289	0.921651	0.949983	1.35944	1.12512	1.44637	0.218093	0.234784	0.162876	0.310438	0.646735	0.929423
ENSMUSG00000013158_ENSMUSG00000013158_4933405L10Rik_chr8:105708290-105710244	ENSMUSG00000013158	ENSMUSG00000013158	4933405L10Rik	chr8:105708290-105710244	protein_coding	0.0823901	0	0	0.137175	0.0744991	0	0	0.0828948	0	0	0.0622879	0
ENSMUSG00000013160_ENSMUSG00000013160_Atp6v0d1_chr8:105524464-105566047	ENSMUSG00000013160	ENSMUSG00000013160	Atp6v0d1	chr8:105524464-105566047	protein_coding	22.3125	23.3373	24.6334	23.9692	22.141	24.8904	39.9016	36.2694	40.3208	29.2058	29.93	27.8149
ENSMUSG00000013236_ENSMUSG00000013236_Ptprs_chr17:56412430-56476483	ENSMUSG00000013236	ENSMUSG00000013236	Ptprs	chr17:56412430-56476483	protein_coding	5.60458	5.00311	6.39935	5.72732	6.29903	5.99956	3.88868	2.80493	3.9193	3.41333	3.45934	3.61105
ENSMUSG00000013275_ENSMUSG00000013275_Slc41a1_chr1:131827492-131848865	ENSMUSG00000013275	ENSMUSG00000013275	Slc41a1	chr1:131827492-131848865	protein_coding	17.5602	15.8003	19.1327	12.8975	13.7563	11.2007	6.2396	6.34933	5.93177	8.61774	8.1716	10.3418
ENSMUSG00000013338_ENSMUSG00000013338_Fer1l4_chr2:156019138-156052947	ENSMUSG00000013338	ENSMUSG00000013338	Fer1l4	chr2:156019138-156052947	protein_coding	0	0	0	0	0	0	0	0.0269297	0	0.0696061	0	0
ENSMUSG00000013353_ENSMUSG00000013353_4931406B18Rik_chr7:43492043-43505940	ENSMUSG00000013353	ENSMUSG00000013353	4931406B18Rik	chr7:43492043-43505940	protein_coding	0	0	0	0	0	0	0.0337481	0	0	0	0.223021	0.158571
ENSMUSG00000013367_ENSMUSG00000013367_Iglon5_chr7:43472906-43490075	ENSMUSG00000013367	ENSMUSG00000013367	Iglon5	chr7:43472906-43490075	protein_coding	0.549791	0.319714	0.491811	0.773076	0.747002	0.46506	0.193319	0.381779	0.684974	0.384847	0.234215	0.273918
ENSMUSG00000013415_ENSMUSG00000013415_Igf2bp1_chr11:95957162-96005940	ENSMUSG00000013415	ENSMUSG00000013415	Igf2bp1	chr11:95957162-96005940	protein_coding	0	0.0171585	0	0.0169202	0.00920033	0.00858625	0	0.222545	0	0	0.0307701	0.168554
ENSMUSG00000013418_ENSMUSG00000013418_B4galnt2_chr11:95865942-95914891	ENSMUSG00000013418	ENSMUSG00000013418	B4galnt2	chr11:95865942-95914891	protein_coding	0.164055	0.0462757	0.111597	0	0	0	0.0384048	0	0.114654	0	0.0413845	0
ENSMUSG00000013419_ENSMUSG00000013419_Zfp651_chr9:121760032-121771742	ENSMUSG00000013419	ENSMUSG00000013419	Zfp651	chr9:121760032-121771742	protein_coding	4.08776	3.29634	4.87374	5.47683	4.58602	4.31454	1.77663	1.51511	1.51575	1.78237	1.8712	2.03023
ENSMUSG00000013465_ENSMUSG00000013465_Nelfb_chr2:25199711-25211489	ENSMUSG00000013465	ENSMUSG00000013465	Nelfb	chr2:25199711-25211489	protein_coding	18.5357	18.5708	18.4132	23.7481	22.7145	20.5953	14.165	15.7396	15.6576	15.3453	14.3185	13.8799
ENSMUSG00000013483_ENSMUSG00000013483_Card14_chr11:119307767-119345375	ENSMUSG00000013483	ENSMUSG00000013483	Card14	chr11:119307767-119345375	protein_coding	0.0793498	0.0373766	0.200273	0.176345	0.210824	0.192249	0.100829	0.0267329	0.114935	0.0904282	0.0642038	0.140764
ENSMUSG00000013495_ENSMUSG00000013495_Tmem175_chr5:108629769-108647770	ENSMUSG00000013495	ENSMUSG00000013495	Tmem175	chr5:108629769-108647770	protein_coding	7.6486	5.09532	7.15354	6.7734	8.05775	6.33774	2.78716	2.63474	3.1443	2.49733	3.00667	2.33408
ENSMUSG00000013523_ENSMUSG00000013523_Bcas1_chr2:170346990-170427845	ENSMUSG00000013523	ENSMUSG00000013523	Bcas1	chr2:170346990-170427845	protein_coding	0.628461	0.450168	0.288959	0.331648	0.341009	0.170274	0.0578172	0.0415159	0.0862722	0.331772	0.0311383	0
ENSMUSG00000013539_ENSMUSG00000013539_Tango2_chr16:18300824-18348103	ENSMUSG00000013539	ENSMUSG00000013539	Tango2	chr16:18300824-18348103	protein_coding	14.9769	14.2228	17.294	15.7839	16.3897	14.8073	5.77676	11.0855	7.83475	9.04073	7.51322	10.2005
ENSMUSG00000013562_ENSMUSG00000013562_4833413E03Rik_chr17:31557125-31559113	ENSMUSG00000013562	ENSMUSG00000013562	4833413E03Rik	chr17:31557125-31559113	protein_coding	0	0	0	0	0	0	0.0655234	0	0	0	0	0
ENSMUSG00000013584_ENSMUSG00000013584_Aldh1a2_chr9:71215788-71296243	ENSMUSG00000013584	ENSMUSG00000013584	Aldh1a2	chr9:71215788-71296243	protein_coding	0.201437	0.0681629	0.137213	0.100698	0.109454	0.068153	0.113283	0.0406727	0.0845163	0.289991	0.335554	0.280996
ENSMUSG00000013593_ENSMUSG00000013593_Ndufs2_chr1:171234852-171247122	ENSMUSG00000013593	ENSMUSG00000013593	Ndufs2	chr1:171234852-171247122	protein_coding	587.296	589.4	660.524	609.204	579.998	599.284	516.26	538.401	563.814	542.798	507.217	504.245
ENSMUSG00000013611_ENSMUSG00000013611_Snx31_chr15:36504061-36555573	ENSMUSG00000013611	ENSMUSG00000013611	Snx31	chr15:36504061-36555573	protein_coding	0	0	0	0	0	0	0	0	0	0	0.0293638	0
ENSMUSG00000013622_ENSMUSG00000013622_Atraid_chr5:31048311-31054633	ENSMUSG00000013622	ENSMUSG00000013622	Atraid	chr5:31048311-31054633	protein_coding	84.4333	81.6813	83.2352	86.9156	83.8833	91.326	55.9114	56.8079	61.4414	65.9925	59.5887	50.9444
ENSMUSG00000013629_ENSMUSG00000013629_Cad_chr5:31054779-31078479	ENSMUSG00000013629	ENSMUSG00000013629	Cad	chr5:31054779-31078479	protein_coding	18.7744	15.0028	19.4531	14.9333	18.7014	20.1082	8.17679	7.11668	8.69552	23.145	19.6172	17.1406
ENSMUSG00000013643_ENSMUSG00000013643_Lypd8_chr11:58379042-58390728	ENSMUSG00000013643	ENSMUSG00000013643	Lypd8	chr11:58379042-58390728	protein_coding	0	0	0	0	0	0	0	0	0	0	0	0
ENSMUSG00000013646_ENSMUSG00000013646_Sh3bp5l_chr11:58330723-58347728	ENSMUSG00000013646	ENSMUSG00000013646	Sh3bp5l	chr11:58330723-58347728	protein_coding	14.3832	12.2449	14.7329	16.9519	17.9622	16.7561	22.8243	16.2369	21.2918	11.0402	12.5755	12.845
ENSMUSG00000013653_ENSMUSG00000013653_1810065E05Rik_chr11:58421110-58426024	ENSMUSG00000013653	ENSMUSG00000013653	1810065E05Rik	chr11:58421110-58426024	protein_coding	0	0	0	0	0	0	0	0	0	0	0	0
ENSMUSG00000013662_ENSMUSG00000013662_Atad1_chr19:32672562-32712298	ENSMUSG00000013662	ENSMUSG00000013662	Atad1	chr19:32672562-32712298	protein_coding	20.5464	20.7407	19.1673	23.1111	19.794	21.4698	28.4559	25.6733	27.8327	26.1084	26.475	26.7807
ENSMUSG00000013663_ENSMUSG00000013663_Pten_chr19:32757496-32826160	ENSMUSG00000013663	ENSMUSG00000013663	Pten	chr19:32757496-32826160	protein_coding	15.7248	16.4294	13.5403	16.379	14.8291	15.3427	20.7123	19.8599	22.5847	18.6837	16.4043	19.639
ENSMUSG00000013668_ENSMUSG00000013668_4933402N03Rik_chr7:131137712-131146314	ENSMUSG00000013668	ENSMUSG00000013668	4933402N03Rik	chr7:131137712-131146314	protein_coding	0	0	0	0	0	0	0	0	0	0	0	0
ENSMUSG00000013698_ENSMUSG00000013698_Pea15a_chr1:172196727-172206804	ENSMUSG00000013698	ENSMUSG00000013698	Pea15a	chr1:172196727-172206804	protein_coding	17.8832	18.5726	21.1422	21.9254	23.7154	19.752	20.4631	17.7092	19.6465	21.8956	24.2076	23.9254
ENSMUSG00000013701_ENSMUSG00000013701_Timm23_chr14:32180161-32201898	ENSMUSG00000013701	ENSMUSG00000013701	Timm23	chr14:32180161-32201898	protein_coding	136.189	130.603	130.065	122.252	131.397	129.173	204.254	208.228	205.006	180.543	167.49	152.643
ENSMUSG00000013707_ENSMUSG00000013707_Tnfaip8l2_chr3:95139520-95142360	ENSMUSG00000013707	ENSMUSG00000013707	Tnfaip8l2	chr3:95139520-95142360	protein_coding	1.08575	1.4559	1.53348	1.58151	2.3719	2.52426	0.69731	0.363897	1.23132	1.01092	0.615449	0.991286
ENSMUSG00000013736_ENSMUSG00000013736_Trnt1_chr6:106769119-106782474	ENSMUSG00000013736	ENSMUSG00000013736	Trnt1	chr6:106769119-106782474	protein_coding	11.1863	11.3028	10.0919	10.5296	9.08845	10.614	11.1598	10.2157	11.1011	11.7177	11.3629	12.2572
ENSMUSG00000013766_ENSMUSG00000013766_Ly6g6e_chr17:35076901-35078804	ENSMUSG00000013766	ENSMUSG00000013766	Ly6g6e	chr17:35076901-35078804	protein_coding	0.0885475	0.238385	0.0600406	0.232462	0.25167	0	0	0.31611	0	0	0	0
ENSMUSG00000013787_ENSMUSG00000013787_Ehmt2_chr17:34898468-34914052	ENSMUSG00000013787	ENSMUSG00000013787	Ehmt2	chr17:34898468-34914052	protein_coding	28.3866	27.7751	33.5143	32.9773	34.559	30.781	15.3259	18.3299	15.8199	19.4255	18.1213	17.6473
ENSMUSG00000013822_ENSMUSG00000013822_Elof1_chr9:22112988-22117148	ENSMUSG00000013822	ENSMUSG00000013822	Elof1	chr9:22112988-22117148	protein_coding	41.0297	41.4679	39.7873	32.1057	37.1516	42.3322	60.3606	62.3059	62.1691	40.343	36.6413	35.4291
ENSMUSG00000013833_ENSMUSG00000013833_Med16_chr10:79894707-79908923	ENSMUSG00000013833	ENSMUSG00000013833	Med16	chr10:79894707-79908923	protein_coding	8.85419	7.97855	12.4693	8.87706	13.478	12.3279	8.08379	7.48536	7.76584	11.6377	9.79069	10.3293
ENSMUSG00000013846_ENSMUSG00000013846_St3gal1_chr15:67102874-67113992	ENSMUSG00000013846	ENSMUSG00000013846	St3gal1	chr15:67102874-67113992	protein_coding	10.5675	11.6935	11.8575	13.0318	12.2045	11.6269	12.5589	11.2676	11.2767	17.309	20.4349	21.8236
ENSMUSG00000013858_ENSMUSG00000013858_Tmem259_chr10:79974947-79984330	ENSMUSG00000013858	ENSMUSG00000013858	Tmem259	chr10:79974947-79984330	protein_coding	59.4675	53.8042	70.0186	57.0294	64.6132	60.4043	62.4745	67.1616	64.3386	62.6385	58.3882	56.9195
ENSMUSG00000013878_ENSMUSG00000013878_Rnf170_chr8:26119367-26143871	ENSMUSG00000013878	ENSMUSG00000013878	Rnf170	chr8:26119367-26143871	protein_coding	6.37078	6.92356	8.06675	8.49896	6.2667	6.01103	4.32265	4.58873	5.40098	4.09185	2.23192	3.6457
ENSMUSG00000013921_ENSMUSG00000013921_Clip3_chr7:30291671-30308367	ENSMUSG00000013921	ENSMUSG00000013921	Clip3	chr7:30291671-30308367	protein_coding	3.71345	1.81689	2.23545	2.64588	2.30964	3.2672	1.78646	1.32191	2.73882	1.10788	2.3888	2.17419
ENSMUSG00000013928_ENSMUSG00000013928_Thap8_chr7:30280093-30290237	ENSMUSG00000013928	ENSMUSG00000013928	Thap8	chr7:30280093-30290237	protein_coding	0.0847473	0.430577	0.229938	0.21164	0.38312	0.214952	0.0593984	0.0852503	0	0	0	0.168823
ENSMUSG00000013936_ENSMUSG00000013936_Myl2_chr5:122100950-122113472	ENSMUSG00000013936	ENSMUSG00000013936	Myl2	chr5:122100950-122113472	protein_coding	3.08761	3.54493	8.22322	6.48914	4.55313	2.46861	5.94465	16.0462	11.1773	3.73739	5.19885	4.41507
ENSMUSG00000013973_ENSMUSG00000013973_Dedd_chr1:171329144-171342331	ENSMUSG00000013973	ENSMUSG00000013973	Dedd	chr1:171329144-171342331	protein_coding	4.94042	7.16379	5.85229	7.60678	6.84808	4.72722	6.12243	5.03093	4.52046	5.95894	6.10109	5.61558
ENSMUSG00000013974_ENSMUSG00000013974_1810033B17Rik_chr8:3665761-3668905	ENSMUSG00000013974	ENSMUSG00000013974	1810033B17Rik	chr8:3665761-3668905	protein_coding	0.089503	0.0757979	0.121366	0	0.16182	0	0.250847	0.0899996	0.281095	0.285728	0.270591	0.356581
ENSMUSG00000013997_ENSMUSG00000013997_Nit1_chr1:171338007-171345646	ENSMUSG00000013997	ENSMUSG00000013997	Nit1	chr1:171338007-171345646	protein_coding	34.2454	33.908	36.5924	36.6224	35.7455	35.625	35.3463	36.8147	35.1472	34.3737	30.7362	28.9405
ENSMUSG00000014030_ENSMUSG00000014030_Pax5_chr4:44531144-44711446	ENSMUSG00000014030	ENSMUSG00000014030	Pax5	chr4:44531144-44711446	protein_coding	0	0.122734	0	0.124757	0	1.3684	0	0	0	0	0.226346	0.132196
ENSMUSG00000014039_ENSMUSG00000014039_Prdm15_chr16:97791466-97851850	ENSMUSG00000014039	ENSMUSG00000014039	Prdm15	chr16:97791466-97851850	protein_coding	1.91156	0.97403	1.98158	1.52331	1.6729	1.14326	1.81577	1.36128	2.25179	2.20435	1.94531	2.77458
ENSMUSG00000014074_ENSMUSG00000014074_Rnf168_chr16:32277458-32301434	ENSMUSG00000014074	ENSMUSG00000014074	Rnf168	chr16:32277458-32301434	protein_coding	4.27152	4.22766	4.46111	5.41792	4.61275	3.87758	3.22685	3.0889	2.83814	3.71883	3.69922	3.80966
ENSMUSG00000014075_ENSMUSG00000014075_Tctex1d2_chr16:32419701-32429099	ENSMUSG00000014075	ENSMUSG00000014075	Tctex1d2	chr16:32419701-32429099	protein_coding	7.08029	4.02206	4.7541	5.87903	4.40946	5.73889	3.60807	3.77006	1.57391	3.78338	3.74374	3.69917
ENSMUSG00000014077_ENSMUSG00000014077_Chp1_chr2:119547696-119587027	ENSMUSG00000014077	ENSMUSG00000014077	Chp1	chr2:119547696-119587027	protein_coding	136.925	147.94	159.668	150.626	143.553	153.28	162.146	155.96	162.108	148.963	136.983	135.107
ENSMUSG00000014104_ENSMUSG00000014104_Sval2_chr6:41852988-41864413	ENSMUSG00000014104	ENSMUSG00000014104	Sval2	chr6:41852988-41864413	protein_coding	0	0	0	0	0	0	0	0	0	0	0	0
ENSMUSG00000014158_ENSMUSG00000014158_Trpv4_chr5:114622151-114658421	ENSMUSG00000014158	ENSMUSG00000014158	Trpv4	chr5:114622151-114658421	protein_coding	0.725363	0.557182	0.870844	1.2109	1.22734	0.998805	1.08173	1.55353	1.36241	2.26176	2.05035	1.55335
ENSMUSG00000014164_ENSMUSG00000014164_Klhl3_chr13:58004220-58113592	ENSMUSG00000014164	ENSMUSG00000014164	Klhl3	chr13:58004220-58113592	protein_coding	0.168652	0.0362298	0.325869	0.249772	0.193685	0.181424	0.0197753	0	0.0589969	0.0899705	0	0.0560211
ENSMUSG00000014177_ENSMUSG00000014177_Tvp23b_chr11:62879454-62916780	ENSMUSG00000014177	ENSMUSG00000014177	Tvp23b	chr11:62879454-62916780	protein_coding	14.621	15.8703	13.9406	14.4413	15.7288	16.0117	15.4409	17.1745	16.0954	17.1567	14.4824	14.2494
ENSMUSG00000014195_ENSMUSG00000014195_Dnajc7_chr11:100582817-100620168	ENSMUSG00000014195	ENSMUSG00000014195	Dnajc7	chr11:100582817-100620168	protein_coding	139.656	125.311	133.689	134.265	117.954	123.096	96.8105	92.6695	82.154	102.258	102.778	95.6542
ENSMUSG00000014198_ENSMUSG00000014198_Zfp385c_chr11:100627542-100692455	ENSMUSG00000014198	ENSMUSG00000014198	Zfp385c	chr11:100627542-100692455	protein_coding	0.11835	0.0547904	0.0220792	0.0674744	0.106686	0.128424	0	0	0	0	0	0
ENSMUSG00000014226_ENSMUSG00000014226_Cacybp_chr1:160202366-160212892	ENSMUSG00000014226	ENSMUSG00000014226	Cacybp	chr1:160202366-160212892	protein_coding	12.7687	13.8889	12.1553	11.7594	14.197	14.0325	26.0981	27.7037	28.6963	19.9006	21.2084	18.8671
ENSMUSG00000014232_ENSMUSG00000014232_Cluap1_chr16:3908800-3941147	ENSMUSG00000014232	ENSMUSG00000014232	Cluap1	chr16:3908800-3941147	protein_coding	5.0867	5.1141	5.13667	5.19088	5.14691	5.95509	3.37256	3.28021	3.30825	3.54118	3.52452	4.15947
ENSMUSG00000014243_ENSMUSG00000014243_Zswim7_chr11:62267223-62281375	ENSMUSG00000014243	ENSMUSG00000014243	Zswim7	chr11:62267223-62281375	protein_coding	18.1105	16.8296	16.0197	16.7562	17.7517	21.0219	14.3898	9.76448	14.4692	11.9055	10.2109	10.8169
ENSMUSG00000014245_ENSMUSG00000014245_Pigl_chr11:62458459-62514417	ENSMUSG00000014245	ENSMUSG00000014245	Pigl	chr11:62458459-62514417	protein_coding	4.17646	4.04737	4.33553	4.38741	5.15025	4.77492	2.96119	2.08376	3.0047	5.05373	4.40183	4.1113
ENSMUSG00000014294_ENSMUSG00000014294_Ndufa2_chr18:36742331-36744557	ENSMUSG00000014294	ENSMUSG00000014294	Ndufa2	chr18:36742331-36744557	protein_coding	287.237	264.353	327.015	315.805	307.619	324.621	340.327	368.026	346.907	326.983	291.039	297.932
ENSMUSG00000014301_ENSMUSG00000014301_Pam16_chr16:4616463-4624988	ENSMUSG00000014301	ENSMUSG00000014301	Pam16	chr16:4616463-4624988	protein_coding	67.9392	65.125	66.3309	76.3872	74.7657	80.4377	104.447	116.31	114.532	110.069	101.09	89.5035
ENSMUSG00000014303_ENSMUSG00000014303_Glis2_chr16:4594712-4624924	ENSMUSG00000014303	ENSMUSG00000014303	Glis2	chr16:4594712-4624924	protein_coding	2.53825	1.99183	2.61501	2.38828	2.03473	1.37271	2.33922	3.31781	2.90699	2.6393	3.10304	2.38639
ENSMUSG00000014313_ENSMUSG00000014313_Cox6c_chr15:35925885-35938246	ENSMUSG00000014313	ENSMUSG00000014313	Cox6c	chr15:35925885-35938246	protein_coding	1983.99	1832.09	1898.18	1898.43	1783.51	2000.45	1915.19	2014.38	2050.09	1802.31	1745.76	1721.53
ENSMUSG00000014329_ENSMUSG00000014329_Bicc1_chr10:70922831-71159700	ENSMUSG00000014329	ENSMUSG00000014329	Bicc1	chr10:70922831-71159700	protein_coding	1.86976	2.02431	2.19189	2.52374	2.38325	2.13349	1.17293	1.30195	1.37331	1.84009	2.32898	2.06445
ENSMUSG00000014349_ENSMUSG00000014349_Ube2z_chr11:96047431-96065388	ENSMUSG00000014349	ENSMUSG00000014349	Ube2z	chr11:96047431-96065388	protein_coding	8.9245	9.22989	8.86599	8.33156	9.257	8.12368	7.99026	7.49731	7.48512	9.45436	9.66242	9.39501
ENSMUSG00000014351_ENSMUSG00000014351_Gip_chr11:96024544-96030831	ENSMUSG00000014351	ENSMUSG00000014351	Gip	chr11:96024544-96030831	protein_coding	0	0	0	0	0	0	0	0	0	0	0	0
ENSMUSG00000014353_ENSMUSG00000014353_Tmem87b_chr2:128818117-128854261	ENSMUSG00000014353	ENSMUSG00000014353	Tmem87b	chr2:128818117-128854261	protein_coding	11.2402	11.0938	11.6078	11.1687	9.47145	10.3731	8.0792	10.4378	9.1856	10.8422	12.6594	13.3019
ENSMUSG00000014355_ENSMUSG00000014355_Anapc1_chr2:128610103-128687391	ENSMUSG00000014355	ENSMUSG00000014355	Anapc1	chr2:128610103-128687391	protein_coding	11.7405	18.0537	16.8839	16.9874	16.0463	14.2675	12.1532	6.65211	10.9216	11.3762	10.8644	11.687
ENSMUSG00000014361_ENSMUSG00000014361_Mertk_chr2:128698955-128802894	ENSMUSG00000014361	ENSMUSG00000014361	Mertk	chr2:128698955-128802894	protein_coding	1.76536	1.90508	1.93641	1.78229	1.717	2.04879	1.06103	1.09519	0.935733	1.39281	1.87089	1.32328
ENSMUSG00000014402_ENSMUSG00000014402_Tsg101_chr7:46888948-46919969	ENSMUSG00000014402	ENSMUSG00000014402	Tsg101	chr7:46888948-46919969	protein_coding	22.0174	22.4524	22.6897	19.3288	19.2444	20.0489	21.6326	20.3591	22.4157	19.6848	22.3569	20.5775
ENSMUSG00000014418_ENSMUSG00000014418_Hps5_chr7:46760465-46796064	ENSMUSG00000014418	ENSMUSG00000014418	Hps5	chr7:46760465-46796064	protein_coding	8.9685	8.63431	8.34069	8.42922	11.2226	12.1424	8.89099	10.2745	9.49652	6.75975	9.4241	10.0857
ENSMUSG00000014426_ENSMUSG00000014426_Map3k4_chr17:12227620-12318660	ENSMUSG00000014426	ENSMUSG00000014426	Map3k4	chr17:12227620-12318660	protein_coding	2.7973	2.76392	3.17561	3.13154	3.12511	3.13715	1.46573	1.55462	0.88791	1.53643	1.24485	1.58838
ENSMUSG00000014453_ENSMUSG00000014453_Blk_chr14:63372836-63417187	ENSMUSG00000014453	ENSMUSG00000014453	Blk	chr14:63372836-63417187	protein_coding	0	0	0.0498006	0.152239	0.0661945	0.154549	0	0	0.0383353	0.0292304	0	0.0364115
ENSMUSG00000014496_ENSMUSG00000014496_Ankrd28_chr14:31700014-31830415	ENSMUSG00000014496	ENSMUSG00000014496	Ankrd28	chr14:31700014-31830415	protein_coding	6.83491	6.5328	5.6807	7.00459	6.13523	5.8943	7.75325	6.8635	6.10134	7.53394	7.53196	8.40753
ENSMUSG00000014498_ENSMUSG00000014498_Ankrd52_chr10:128377114-128408704	ENSMUSG00000014498	ENSMUSG00000014498	Ankrd52	chr10:128377114-128408704	protein_coding	10.976	12.0778	12.1772	11.5295	13.9562	11.1611	24.8396	19.865	23.44	17.9898	16.2366	17.9151
ENSMUSG00000014503_ENSMUSG00000014503_Pkd2l2_chr18:34409422-34442789	ENSMUSG00000014503	ENSMUSG00000014503	Pkd2l2	chr18:34409422-34442789	protein_coding	1.43934	1.71168	1.14329	0.987626	1.30701	1.50135	0.755199	0.564844	0.80531	0.4347	0.293324	0.386024
ENSMUSG00000014504_ENSMUSG00000014504_Srp19_chr18:34330846-34336599	ENSMUSG00000014504	ENSMUSG00000014504	Srp19	chr18:34330846-34336599	protein_coding	20.3012	20.8998	20.7098	19.7327	23.4672	19.9906	26.2886	31.1872	30.7058	16.7414	23.789	22.242
ENSMUSG00000014529_ENSMUSG00000014529_4930511M11Rik_chr5:3657003-3680325	ENSMUSG00000014529	ENSMUSG00000014529	4930511M11Rik	chr5:3657003-3680325	protein_coding	0	0	0	0	0	0	0	0	0	0	0	0
ENSMUSG00000014542_ENSMUSG00000014542_Clec4f_chr6:83644541-83656187	ENSMUSG00000014542	ENSMUSG00000014542	Clec4f	chr6:83644541-83656187	protein_coding	0	0	0	0	0	0	0	0.206193	0	0	0.0277216	0
ENSMUSG00000014543_ENSMUSG00000014543_Klra17_chr6:129831153-129876672	ENSMUSG00000014543	ENSMUSG00000014543	Klra17	chr6:129831153-129876672	protein_coding	0	0	0.0584236	0	0	0	0.0603711	0	0	0	0.325896	0.0857994
ENSMUSG00000014547_ENSMUSG00000014547_Wdfy2_chr14:62837689-62956886	ENSMUSG00000014547	ENSMUSG00000014547	Wdfy2	chr14:62837689-62956886	protein_coding	3.30713	2.56487	3.28346	3.74996	2.95276	3.53526	2.25938	2.13212	2.45659	1.83635	2.36449	2.37977
ENSMUSG00000014550_ENSMUSG00000014550_Zfyve20_chr6:92186711-92214925	ENSMUSG00000014550	ENSMUSG00000014550	Zfyve20	chr6:92186711-92214925	protein_coding	5.30424	5.67626	5.92772	6.08473	5.58465	5.23331	8.72912	8.29356	9.33375	7.98371	6.94278	8.80038
ENSMUSG00000014551_ENSMUSG00000014551_Mrps25_chr6:92169524-92184033	ENSMUSG00000014551	ENSMUSG00000014551	Mrps25	chr6:92169524-92184033	protein_coding	31.9639	36.1774	40.2943	38.7381	39.6818	33.3306	34.4865	33.7332	35.8698	44.95	33.2951	33.5026
ENSMUSG00000014554_ENSMUSG00000014554_Dguok_chr6:83480216-83506969	ENSMUSG00000014554	ENSMUSG00000014554	Dguok	chr6:83480216-83506969	protein_coding	22.4622	18.468	22.5916	23.9399	20.9846	20.7834	10.945	10.8781	8.70165	15.6813	15.7924	14.1214
ENSMUSG00000014592_ENSMUSG00000014592_Camta1_chr4:150917321-151861876	ENSMUSG00000014592	ENSMUSG00000014592	Camta1	chr4:150917321-151861876	protein_coding	7.2393	8.14447	6.16628	6.49381	5.95665	4.85043	5.14744	3.70843	5.18314	4.78858	5.87972	8.91802
ENSMUSG00000014599_ENSMUSG00000014599_Csf1_chr3:107741047-107760469	ENSMUSG00000014599	ENSMUSG00000014599	Csf1	chr3:107741047-107760469	protein_coding	6.89159	4.44467	7.50312	9.76342	6.74213	6.41654	13.4151	11.0757	11.1401	13.5417	20.4414	21.6859
ENSMUSG00000014601_ENSMUSG00000014601_Strip1_chr3:107612531-107631710	ENSMUSG00000014601	ENSMUSG00000014601	Strip1	chr3:107612531-107631710	protein_coding	15.8165	15.6713	17.1432	13.775	14.8517	14.4001	14.1945	13.2418	11.363	11.6696	11.2133	12.0189
ENSMUSG00000014602_ENSMUSG00000014602_Kif1a_chr1:93015455-93101865	ENSMUSG00000014602	ENSMUSG00000014602	Kif1a	chr1:93015455-93101865	protein_coding	0.0847738	0.0735267	0.0926539	0.0516389	0.0374102	0.0996828	0.0290679	0.146579	0.0433376	0.0992519	0.141324	0.118458
ENSMUSG00000014603_ENSMUSG00000014603_Alx3_chr3:107595030-107605769	ENSMUSG00000014603	ENSMUSG00000014603	Alx3	chr3:107595030-107605769	protein_coding	0	0	0	0	0	0	0	0	0	0	0	0
ENSMUSG00000014606_ENSMUSG00000014606_Slc25a11_chr11:70644195-70647479	ENSMUSG00000014606	ENSMUSG00000014606	Slc25a11	chr11:70644195-70647479	protein_coding	102.421	89.1214	103.557	106.945	100.428	98.3589	72.096	70.4643	78.5677	91.6112	75.6008	84.8134
ENSMUSG00000014609_ENSMUSG00000014609_Chrne_chr11:70614882-70619216	ENSMUSG00000014609	ENSMUSG00000014609	Chrne	chr11:70614882-70619216	protein_coding	0.0598187	0.202597	0.298918	0.29907	0.0541332	0.160787	0	0.255849	0.125431	0.302573	0	0
ENSMUSG00000014633_ENSMUSG00000014633_Cmc2_chr8:116888684-116921455	ENSMUSG00000014633	ENSMUSG00000014633	Cmc2	chr8:116888684-116921455	protein_coding	25.9203	25.1362	26.5005	24.5646	24.8408	24.9227	22.0323	28.9661	35.5005	27.505	23.9158	23.6527
ENSMUSG00000014668_ENSMUSG00000014668_Chfr_chr5:110135839-110171972	ENSMUSG00000014668	ENSMUSG00000014668	Chfr	chr5:110135839-110171972	protein_coding	4.98176	5.18502	5.4977	5.62092	6.28899	5.5649	5.53461	5.62853	5.93279	4.9729	4.68555	4.79712
ENSMUSG00000014686_ENSMUSG00000014686_Ceacam16_chr7:19852096-19861299	ENSMUSG00000014686	ENSMUSG00000014686	Ceacam16	chr7:19852096-19861299	protein_coding	0	0	0	0	0.0525029	0	0.0814658	0	0	0.0463622	0.0438975	0
ENSMUSG00000014704_ENSMUSG00000014704_Hoxa2_chr6:52162350-52165413	ENSMUSG00000014704	ENSMUSG00000014704	Hoxa2	chr6:52162350-52165413	protein_coding	0.972372	1.29707	1.25749	1.18412	1.35489	0.854124	0.73627	0.717543	0.784657	0.867526	1.04787	0.804916
ENSMUSG00000014725_ENSMUSG00000014725_Adam28_chr14:68606026-68655842	ENSMUSG00000014725	ENSMUSG00000014725	Adam28	chr14:68606026-68655842	protein_coding	0.0294142	0	0	0	0.0133241	0.0248822	0.0103461	0	0.0308663	0.0470718	0.0187795	0
ENSMUSG00000014747_ENSMUSG00000014747_Ankrd53_chr6:83762643-83768326	ENSMUSG00000014747	ENSMUSG00000014747	Ankrd53	chr6:83762643-83768326	protein_coding	0.0540787	0.0457622	0	0.0450442	0.0489495	0	0	0	0	0	0	0
ENSMUSG00000014748_ENSMUSG00000014748_Tex261_chr6:83768880-83775812	ENSMUSG00000014748	ENSMUSG00000014748	Tex261	chr6:83768880-83775812	protein_coding	15.1042	14.6376	21.7321	19.2637	17.1407	15.8632	13.5932	13.949	15.5404	17.7242	14.3981	16.7457
ENSMUSG00000014763_ENSMUSG00000014763_Fam120b_chr17:15396245-15433580	ENSMUSG00000014763	ENSMUSG00000014763	Fam120b	chr17:15396245-15433580	protein_coding	3.75009	3.95149	3.75405	3.60661	4.20045	3.87222	4.90075	4.06471	4.28003	3.98723	3.36632	3.35391
ENSMUSG00000014767_ENSMUSG00000014767_Tbp_chr17:15499887-15528379	ENSMUSG00000014767	ENSMUSG00000014767	Tbp	chr17:15499887-15528379	protein_coding	6.22334	7.06236	7.52372	8.84482	7.02565	7.12446	6.40659	7.99675	7.21888	6.32246	7.65211	6.89593
ENSMUSG00000014769_ENSMUSG00000014769_Psmb1_chr17:15475720-15498276	ENSMUSG00000014769	ENSMUSG00000014769	Psmb1	chr17:15475720-15498276	protein_coding	63.6026	64.7017	66.1423	77.1093	69.6553	76.9768	66.2061	69.9212	70.4227	62.2084	70.9111	54.7415
ENSMUSG00000014771_ENSMUSG00000014771_Pdcd2_chr17:15519207-15527301	ENSMUSG00000014771	ENSMUSG00000014771	Pdcd2	chr17:15519207-15527301	protein_coding	8.82259	8.07623	9.09173	9.41663	9.77254	9.98145	5.31261	6.39861	6.11284	8.92878	10.0458	9.3989
ENSMUSG00000014773_ENSMUSG00000014773_Dll1_chr17:15367353-15376872	ENSMUSG00000014773	ENSMUSG00000014773	Dll1	chr17:15367353-15376872	protein_coding	1.44739	1.4369	2.39618	2.97833	2.77368	1.83872	1.68345	1.14886	0.489963	1.67689	3.83934	3.2369
ENSMUSG00000014776_ENSMUSG00000014776_Nol3_chr8:105276446-105281939	ENSMUSG00000014776	ENSMUSG00000014776	Nol3	chr8:105276446-105281939	protein_coding	13.4511	12.4565	14.0954	11.5204	13.5394	11.5892	7.05232	6.60617	6.76306	8.86884	8.53747	7.19825
ENSMUSG00000014778_ENSMUSG00000014778_Fhod1_chr8:105329162-105347953	ENSMUSG00000014778	ENSMUSG00000014778	Fhod1	chr8:105329162-105347953	protein_coding	6.66125	5.08124	6.79486	6.7354	7.00005	5.25633	3.78486	3.21209	2.76135	5.46622	6.22503	5.56738
ENSMUSG00000014782_ENSMUSG00000014782_Plekhg4_chr8:105373273-105382862	ENSMUSG00000014782	ENSMUSG00000014782	Plekhg4	chr8:105373273-105382862	protein_coding	0.0589194	0.133497	0.079415	0	0.21334	0.0671688	0.0405887	0.0846748	0.0439521	0	0.104521	0.14071
ENSMUSG00000014786_ENSMUSG00000014786_Slc9a5_chr8:105348257-105369881	ENSMUSG00000014786	ENSMUSG00000014786	Slc9a5	chr8:105348257-105369881	protein_coding	0.578637	0.475267	0.40633	0.661472	0.614378	0.573468	0.465611	0.501684	0.260363	0.569142	0.62645	0.477805
ENSMUSG00000014791_ENSMUSG00000014791_Elmo3_chr8:105305600-105310623	ENSMUSG00000014791	ENSMUSG00000014791	Elmo3	chr8:105305600-105310623	protein_coding	0.40675	0.516011	0.515101	0.895832	1.05287	0.933935	0.367903	0.293581	0.335371	0.348716	0.264094	0.173709
ENSMUSG00000014813_ENSMUSG00000014813_Stc1_chr14:69029288-69041401	ENSMUSG00000014813	ENSMUSG00000014813	Stc1	chr14:69029288-69041401	protein_coding	0.257887	0.198255	0.335899	0.175854	0.29742	0.297499	1.12194	1.23244	0.88587	1.40729	2.06046	1.79895
ENSMUSG00000014837_ENSMUSG00000014837_4931428F04Rik_chr8:105280409-105289528	ENSMUSG00000014837	ENSMUSG00000014837	4931428F04Rik	chr8:105280409-105289528	protein_coding	9.64441	8.65595	9.94242	8.2241	8.5082	7.85056	5.08362	5.59737	5.72421	6.95205	6.43233	4.98688
ENSMUSG00000014846_ENSMUSG00000014846_Tppp3_chr8:105467492-105471526	ENSMUSG00000014846	ENSMUSG00000014846	Tppp3	chr8:105467492-105471526	protein_coding	15.9855	15.1304	20.1104	20.6318	18.0988	16.4994	18.4424	16.6216	18.165	22.4653	20.6619	18.7252
ENSMUSG00000014850_ENSMUSG00000014850_Msh3_chr13:92211880-92355003	ENSMUSG00000014850	ENSMUSG00000014850	Msh3	chr13:92211880-92355003	protein_coding	4.7239	3.76957	4.41884	5.12017	4.58227	4.80313	1.38922	1.14357	1.04758	2.84021	2.35254	2.58584
ENSMUSG00000014852_ENSMUSG00000014852_Adamts13_chr2:26973415-27009628	ENSMUSG00000014852	ENSMUSG00000014852	Adamts13	chr2:26973415-27009628	protein_coding	0.680438	0.650177	0.719451	0.45289	0.492391	0.471234	0.346678	0.312043	0.412774	0.348593	0.412333	0.556276
ENSMUSG00000014856_ENSMUSG00000014856_Tmem208_chr8:105326353-105335219	ENSMUSG00000014856	ENSMUSG00000014856	Tmem208	chr8:105326353-105335219	protein_coding	20.707	22.6672	23.5819	20.5768	25.8645	22.2618	31.8089	31.1526	28.7748	24.0069	26.8997	28.3459
ENSMUSG00000014859_ENSMUSG00000014859_E2f4_chr8:105297662-105305369	ENSMUSG00000014859	ENSMUSG00000014859	E2f4	chr8:105297662-105305369	protein_coding	11.2338	11.5077	12.8937	11.5628	12.8611	11.1111	19.1148	16.535	15.6262	18.2614	19.679	17.8067
ENSMUSG00000014867_ENSMUSG00000014867_Surf4_chr2:26920039-26933928	ENSMUSG00000014867	ENSMUSG00000014867	Surf4	chr2:26920039-26933928	protein_coding	31.32	31.8206	32.5986	34.3797	31.3721	31.1189	35.6883	34.0153	37.0179	35.1061	32.8688	33.4444
ENSMUSG00000014873_ENSMUSG00000014873_Surf2_chr2:26916366-26920183	ENSMUSG00000014873	ENSMUSG00000014873	Surf2	chr2:26916366-26920183	protein_coding	10.8232	9.8739	14.4089	12.6598	9.63079	10.8018	17.6297	20.0736	16.5348	19.7149	17.1746	18.8081
ENSMUSG00000014905_ENSMUSG00000014905_Dnajb9_chr12:44205896-44210068	ENSMUSG00000014905	ENSMUSG00000014905	Dnajb9	chr12:44205896-44210068	protein_coding	10.0446	12.9389	10.7468	10.7816	10.7671	14.3278	40.1973	42.0431	44.4854	28.2054	27.9528	27.2097
ENSMUSG00000014907_ENSMUSG00000014907_Naf1_chr8:66860216-66890564	ENSMUSG00000014907	ENSMUSG00000014907	Naf1	chr8:66860216-66890564	protein_coding	2.65077	2.34268	2.49791	2.25861	2.69828	2.04078	2.34661	2.97934	2.8441	3.71769	3.88041	5.04544
ENSMUSG00000014932_ENSMUSG00000014932_Yes1_chr5:32611170-32687066	ENSMUSG00000014932	ENSMUSG00000014932	Yes1	chr5:32611170-32687066	protein_coding	7.47954	8.19526	7.45358	7.16158	8.3914	6.69085	5.13622	6.04948	5.21739	6.01716	7.03515	6.52333
ENSMUSG00000014956_ENSMUSG00000014956_Ppp1cb_chr5:32458973-32517433	ENSMUSG00000014956	ENSMUSG00000014956	Ppp1cb	chr5:32458973-32517433	protein_coding	63.6655	67.0692	64.521	55.2278	53.4141	53.9774	52.4501	51.2886	50.6943	48.589	46.8037	50.5529
ENSMUSG00000014959_ENSMUSG00000014959_Gorasp2_chr2:70661575-70712636	ENSMUSG00000014959	ENSMUSG00000014959	Gorasp2	chr2:70661575-70712636	protein_coding	21.4354	22.0822	22.2023	20.352	21.7949	24.2439	26.4716	26.6176	27.8441	23.9664	25.8144	26.6081
ENSMUSG00000014980_ENSMUSG00000014980_Tsen15_chr1:152370734-152386688	ENSMUSG00000014980	ENSMUSG00000014980	Tsen15	chr1:152370734-152386688	protein_coding	4.60444	5.23159	4.4681	7.98876	4.0412	4.61081	4.68016	3.64968	3.00971	4.62606	5.95288	4.54155
ENSMUSG00000015001_ENSMUSG00000015001_Oc90_chr15:65876052-65912397	ENSMUSG00000015001	ENSMUSG00000015001	Oc90	chr15:65876052-65912397	protein_coding	0	0	0	0	0	0	0	0	0	0	0	0
ENSMUSG00000015002_ENSMUSG00000015002_Efr3a_chr15:65787033-65873816	ENSMUSG00000015002	ENSMUSG00000015002	Efr3a	chr15:65787033-65873816	protein_coding	8.61389	7.98883	9.71701	8.56399	8.64483	8.57248	11.1503	11.8029	12.0087	9.27884	9.79754	9.36492
ENSMUSG00000015023_ENSMUSG00000015023_Ddx19a_chr8:110974995-110997800	ENSMUSG00000015023	ENSMUSG00000015023	Ddx19a	chr8:110974995-110997800	protein_coding	11.6914	10.5585	11.8994	12.2831	11.6086	12.0344	11.1441	10.9355	11.0801	11.0591	12.2096	11.9819
ENSMUSG00000015053_ENSMUSG00000015053_Gata2_chr6:88193890-88207030	ENSMUSG00000015053	ENSMUSG00000015053	Gata2	chr6:88193890-88207030	protein_coding	2.8148	3.05002	3.63351	4.25777	3.49031	3.12018	2.9215	3.25816	2.37983	4.56941	3.95574	3.92049
ENSMUSG00000015083_ENSMUSG00000015083_C8g_chr2:25498650-25501719	ENSMUSG00000015083	ENSMUSG00000015083	C8g	chr2:25498650-25501719	protein_coding	5.70777	7.51234	7.6781	5.60711	6.68886	8.58377	1.44992	1.27812	1.0529	1.18833	1.30051	1.12999
ENSMUSG00000015085_ENSMUSG00000015085_Entpd2_chr2:25395873-25401321	ENSMUSG00000015085	ENSMUSG00000015085	Entpd2	chr2:25395873-25401321	protein_coding	8.09518	6.3487	7.937	11.0039	9.60021	9.37788	4.35927	5.26069	4.74427	3.32608	4.10157	3.20092
ENSMUSG00000015087_ENSMUSG00000015087_Rabl6_chr2:25583017-25608521	ENSMUSG00000015087	ENSMUSG00000015087	Rabl6	chr2:25583017-25608521	protein_coding	27.2221	23.6445	27.5999	24.4993	23.9592	24.2502	26.5985	24.7736	21.5873	20.9744	23.4501	26.7461
ENSMUSG00000015090_ENSMUSG00000015090_Ptgds_chr2:25466708-25470046	ENSMUSG00000015090	ENSMUSG00000015090	Ptgds	chr2:25466708-25470046	protein_coding	5.43142	7.14245	6.83886	2.49304	3.49714	5.43111	1.12981	1.66726	2.09141	1.18713	1.11962	1.56883
ENSMUSG00000015092_ENSMUSG00000015092_Edf1_chr2:25557846-25562082	ENSMUSG00000015092	ENSMUSG00000015092	Edf1	chr2:25557846-25562082	protein_coding	204.639	201.063	221.437	214.154	227.217	238.822	243.658	252.699	273.38	246.98	221.847	220.434
ENSMUSG00000015093_ENSMUSG00000015093_Clic3_chr2:25456837-25458776	ENSMUSG00000015093	ENSMUSG00000015093	Clic3	chr2:25456837-25458776	protein_coding	0.5819	1.51653	1.52778	0.934206	1.68166	1.31958	1.28236	0.58386	0.486825	0.889809	0.552333	0.347668
ENSMUSG00000015094_ENSMUSG00000015094_Npdc1_chr2:25399350-25409494	ENSMUSG00000015094	ENSMUSG00000015094	Npdc1	chr2:25399350-25409494	protein_coding	15.824	14.7649	19.279	17.0324	23.7612	19.5175	15.1302	14.9284	15.9394	21.1857	22.6255	19.5236
ENSMUSG00000015095_ENSMUSG00000015095_Fbxw5_chr2:25500749-25505471	ENSMUSG00000015095	ENSMUSG00000015095	Fbxw5	chr2:25500749-25505471	protein_coding	32.7355	30.8878	34.9763	33.4767	36.1167	35.336	25.8707	22.5864	24.6724	25.465	23.38	25.1567
ENSMUSG00000015112_ENSMUSG00000015112_Slc25a13_chr6:6041217-6217118	ENSMUSG00000015112	ENSMUSG00000015112	Slc25a13	chr6:6041217-6217118	protein_coding	0.260844	0.191708	0.338676	0.21739	0.272125	0.0490343	0.101946	0.11644	0.18571	0.272063	0.344898	0.11553
ENSMUSG00000015120_ENSMUSG00000015120_Ube2i_chr17:25261915-25274622	ENSMUSG00000015120	ENSMUSG00000015120	Ube2i	chr17:25261915-25274622	protein_coding	47.9533	44.5297	55.8046	58.862	54.444	52.7981	42.9919	45.4927	42.1347	47.3447	53.6051	48.2453
ENSMUSG00000015126_ENSMUSG00000015126_Tsr3_chr17:25240169-25242798	ENSMUSG00000015126	ENSMUSG00000015126	Tsr3	chr17:25240169-25242798	protein_coding	8.57414	7.33153	7.81203	5.52808	7.60046	7.74665	6.06871	6.42685	5.19314	7.2472	6.41821	6.9494
ENSMUSG00000015127_ENSMUSG00000015127_Unkl_chr17:25188396-25234443	ENSMUSG00000015127	ENSMUSG00000015127	Unkl	chr17:25188396-25234443	protein_coding	2.93079	2.62721	3.1742	3.22437	2.5639	2.64039	1.47869	1.55866	1.41609	2.30854	1.83827	1.70064
ENSMUSG00000015133_ENSMUSG00000015133_Lrrk1_chr7:66226911-66388350	ENSMUSG00000015133	ENSMUSG00000015133	Lrrk1	chr7:66226911-66388350	protein_coding	1.58809	3.24292	2.42294	1.88431	2.9091	2.21567	1.13641	2.17741	1.75332	1.79095	2.0592	1.43326
ENSMUSG00000015134_ENSMUSG00000015134_Aldh1a3_chr7:66390891-66427517	ENSMUSG00000015134	ENSMUSG00000015134	Aldh1a3	chr7:66390891-66427517	protein_coding	1.59432	1.03201	1.25811	0.939937	1.05376	1.01325	1.45195	0.856558	1.43301	2.05627	1.95266	3.14284
ENSMUSG00000015143_ENSMUSG00000015143_Actn1_chr12:80167541-80260371	ENSMUSG00000015143	ENSMUSG00000015143	Actn1	chr12:80167541-80260371	protein_coding	3.82278	3.70529	4.16446	4.46393	4.24335	3.64368	9.79665	9.607	7.92859	16.8572	20.9146	21.7241
ENSMUSG00000015149_ENSMUSG00000015149_Sirt2_chr7:28766734-28788665	ENSMUSG00000015149	ENSMUSG00000015149	Sirt2	chr7:28766734-28788665	protein_coding	62.3622	55.1734	62.5575	64.5773	61.0148	58.6602	59.3951	58.6881	54.8229	64.4304	61.8621	57.2632
ENSMUSG00000015165_ENSMUSG00000015165_Hnrnpl_chr7:28808540-28822266	ENSMUSG00000015165	ENSMUSG00000015165	Hnrnpl	chr7:28808540-28822266	protein_coding	98.9793	104.694	112.821	109.662	111.468	97.927	76.423	73.6728	73.1897	94.2743	84.5372	88.6358
ENSMUSG00000015176_ENSMUSG00000015176_Nolc1_chr19:46075862-46085528	ENSMUSG00000015176	ENSMUSG00000015176	Nolc1	chr19:46075862-46085528	protein_coding	8.33332	7.85515	9.15064	8.4673	7.91278	6.52791	19.1166	19.3911	20.3747	22.0024	18.455	22.3458
ENSMUSG00000015189_ENSMUSG00000015189_Casd1_chr6:4600839-4643381	ENSMUSG00000015189	ENSMUSG00000015189	Casd1	chr6:4600839-4643381	protein_coding	4.5747	4.31947	4.50713	5.30181	4.69097	4.04417	4.50083	5.19639	5.37398	4.4696	5.25353	4.57448
ENSMUSG00000015202_ENSMUSG00000015202_Cnksr3_chr10:7119062-7212237	ENSMUSG00000015202	ENSMUSG00000015202	Cnksr3	chr10:7119062-7212237	protein_coding	1.98336	2.53152	3.19375	2.60136	2.13278	2.02616	1.7283	1.73267	1.4237	2.27277	3.17882	2.34562
ENSMUSG00000015214_ENSMUSG00000015214_Mtmr1_chrX:71364759-71419196	ENSMUSG00000015214	ENSMUSG00000015214	Mtmr1	chrX:71364759-71419196	protein_coding	14.0859	12.2771	12.362	14.561	11.3226	12.2138	14.1111	11.8135	13.3838	13.8957	12.4392	12.2288
ENSMUSG00000015217_ENSMUSG00000015217_Hmgb3_chrX:71555917-71560676	ENSMUSG00000015217	ENSMUSG00000015217	Hmgb3	chrX:71555917-71560676	protein_coding	36.0824	37.3015	30.216	35.5883	33.6192	34.2899	8.8932	10.6803	9.33931	15.3073	13.1667	12.9647
ENSMUSG00000015222_ENSMUSG00000015222_Map2_chr1:66175272-66442583	ENSMUSG00000015222	ENSMUSG00000015222	Map2	chr1:66175272-66442583	protein_coding	0.185574	0.433391	0.366675	0.297679	0.316567	0.13223	0.163363	0.153718	0.0182268	0.231682	0.173324	0.101766
ENSMUSG00000015224_ENSMUSG00000015224_Cyp2j9_chr4:96568428-96591578	ENSMUSG00000015224	ENSMUSG00000015224	Cyp2j9	chr4:96568428-96591578	protein_coding	2.11391	1.54189	1.68986	2.09939	2.12164	1.78582	0.731862	0.319864	0.664802	0.526192	0.553704	0.451154
ENSMUSG00000015242_ENSMUSG00000015242_Nipsnap3a_chr4:52989271-53001162	ENSMUSG00000015242	ENSMUSG00000015242	Nipsnap3a	chr4:52989271-53001162	protein_coding	0	0	0	0	0	0	0	0	0	0	0	0
ENSMUSG00000015243_ENSMUSG00000015243_Abca1_chr4:53030786-53159895	ENSMUSG00000015243	ENSMUSG00000015243	Abca1	chr4:53030786-53159895	protein_coding	10.2124	10.4965	11.5809	14.591	12.0394	11.1319	13.3785	14.7615	14.8669	7.25389	7.37897	6.08767
ENSMUSG00000015247_ENSMUSG00000015247_Nipsnap3b_chr4:53011879-53022060	ENSMUSG00000015247	ENSMUSG00000015247	Nipsnap3b	chr4:53011879-53022060	protein_coding	12.1198	11.7905	12.7121	12.9549	11.6312	12.1285	9.46704	11.09	7.695	10.0707	12.3258	11.43
ENSMUSG00000015289_ENSMUSG00000015289_Lage3_chrX:74351275-74353618	ENSMUSG00000015289	ENSMUSG00000015289	Lage3	chrX:74351275-74353618	protein_coding	25.5363	22.9003	25.4493	26.3433	25.3194	20.5189	16.9252	19.0331	16.6268	18.7959	15.4551	16.4222
ENSMUSG00000015290_ENSMUSG00000015290_Ubl4_chrX:74365717-74373218	ENSMUSG00000015290	ENSMUSG00000015290	Ubl4	chrX:74365717-74373218	protein_coding	22.4472	19.7553	23.0584	21.7074	23.5528	19.6626	22.9019	23.3218	23.0273	30.4834	27.0181	29.8093
ENSMUSG00000015291_ENSMUSG00000015291_Gdi1_chrX:74304997-74311862	ENSMUSG00000015291	ENSMUSG00000015291	Gdi1	chrX:74304997-74311862	protein_coding	51.4802	45.951	62.1657	64.7598	66.613	49.0257	39.9564	44.418	40.5642	57.8719	48.7685	53.7755
ENSMUSG00000015305_ENSMUSG00000015305_Sash1_chr10:8722218-8886070	ENSMUSG00000015305	ENSMUSG00000015305	Sash1	chr10:8722218-8886070	protein_coding	5.46764	4.27079	5.415	6.80724	6.17425	5.511	21.2887	19.5087	19.6336	32.5229	29.1814	36.6754
ENSMUSG00000015312_ENSMUSG00000015312_Gadd45b_chr10:80930090-80932204	ENSMUSG00000015312	ENSMUSG00000015312	Gadd45b	chr10:80930090-80932204	protein_coding	8.13232	5.16401	9.97776	7.09602	5.65735	2.77685	2.57702	2.99064	2.94831	2.43507	5.32132	5.76384
ENSMUSG00000015314_ENSMUSG00000015314_Slamf6_chr1:171917536-171943868	ENSMUSG00000015314	ENSMUSG00000015314	Slamf6	chr1:171917536-171943868	protein_coding	0.0741293	0.0940587	0.0252551	0	0.0335699	0	0.0260609	0.0374289	0	0.0296477	0.056136	0.036932
ENSMUSG00000015316_ENSMUSG00000015316_Slamf1_chr1:171767126-171801184	ENSMUSG00000015316	ENSMUSG00000015316	Slamf1	chr1:171767126-171801184	protein_coding	0.0333398	0.0281997	0	0.0555676	0.0513903	0.0282019	0.0234477	0.0336776	0.0595194	0.10669	0	0.113139
ENSMUSG00000015335_ENSMUSG00000015335_Zdhhc12_chr2:30090943-30093648	ENSMUSG00000015335	ENSMUSG00000015335	Zdhhc12	chr2:30090943-30093648	protein_coding	6.20776	3.38875	4.74421	3.75925	4.46623	3.30497	1.22729	1.48609	0.943108	1.50374	1.27141	1.11906
ENSMUSG00000015337_ENSMUSG00000015337_Endog_chr2:30171492-30174069	ENSMUSG00000015337	ENSMUSG00000015337	Endog	chr2:30171492-30174069	protein_coding	20.1627	16.2999	24.0788	25.271	24.471	25.9964	24.3132	28.3777	21.6585	30.3991	25.0633	26.0041
ENSMUSG00000015340_ENSMUSG00000015340_Cybb_chrX:9435251-9487771	ENSMUSG00000015340	ENSMUSG00000015340	Cybb	chrX:9435251-9487771	protein_coding	2.48892	1.81232	2.26621	4.19174	2.49301	3.11667	1.12147	0.903177	0.574518	0.984985	0.940932	0.690801
ENSMUSG00000015341_ENSMUSG00000015341_Golga7_chr8:23241352-23257074	ENSMUSG00000015341	ENSMUSG00000015341	Golga7	chr8:23241352-23257074	protein_coding	23.8423	22.843	20.4156	23.72	21.8161	23.4654	26.1983	26.0973	26.8753	24.0769	23.5468	25.6579
ENSMUSG00000015342_ENSMUSG00000015342_Xk_chrX:9272755-9313250	ENSMUSG00000015342	ENSMUSG00000015342	Xk	chrX:9272755-9313250	protein_coding	0.715178	0.532712	0.488238	0.638712	0.478446	0.446593	0.419608	0.620041	0.518447	0.449867	0.425843	0.627885
ENSMUSG00000015354_ENSMUSG00000015354_Pcolce2_chr9:95637600-95698096	ENSMUSG00000015354	ENSMUSG00000015354	Pcolce2	chr9:95637600-95698096	protein_coding	4.64612	4.50591	5.70514	5.50762	6.09024	6.04698	2.57667	2.11908	4.39893	6.81892	6.23639	7.15916
ENSMUSG00000015355_ENSMUSG00000015355_Cd48_chr1:171682008-171705258	ENSMUSG00000015355	ENSMUSG00000015355	Cd48	chr1:171682008-171705258	protein_coding	2.47029	1.58691	1.67554	1.6309	1.92541	1.72844	1.12435	1.37096	0.802717	1.9719	1.93177	1.78174
ENSMUSG00000015357_ENSMUSG00000015357_Clpx_chr9:65294259-65330658	ENSMUSG00000015357	ENSMUSG00000015357	Clpx	chr9:65294259-65330658	protein_coding	56.4334	47.7244	49.7092	55.7853	51.2187	51.3365	33.0114	30.8436	30.9316	46.9689	43.2658	44.9723
ENSMUSG00000015363_ENSMUSG00000015363_Trabd_chr15:89075123-89087077	ENSMUSG00000015363	ENSMUSG00000015363	Trabd	chr15:89075123-89087077	protein_coding	18.8466	19.2027	24.3234	23.296	20.9651	22.9871	24.342	22.2077	22.5879	22.6909	22.3035	22.8872
ENSMUSG00000015365_ENSMUSG00000015365_Mov10l1_chr15:88982908-89055152	ENSMUSG00000015365	ENSMUSG00000015365	Mov10l1	chr15:88982908-89055152	protein_coding	0.07864	0	0	0	0	0.0364723	0	0	0	0	0	0
ENSMUSG00000015377_ENSMUSG00000015377_Dennd6b_chr15:89182216-89196474	ENSMUSG00000015377	ENSMUSG00000015377	Dennd6b	chr15:89182216-89196474	protein_coding	1.2436	1.19493	1.1575	1.41349	1.36617	1.09992	0.848935	1.00995	0.771455	1.08603	0.928093	1.16422
ENSMUSG00000015396_ENSMUSG00000015396_Cd83_chr13:43785106-43803130	ENSMUSG00000015396	ENSMUSG00000015396	Cd83	chr13:43785106-43803130	protein_coding	1.24129	1.33983	1.07853	1.49773	1.27906	1.19472	1.62455	1.25291	1.2121	1.8484	1.58793	2.08976
ENSMUSG00000015401_ENSMUSG00000015401_Tmem27_chrX:164088829-164118860	ENSMUSG00000015401	ENSMUSG00000015401	Tmem27	chrX:164088829-164118860	protein_coding	0	0	0	0	0	0	0	0	0	0	0	0
ENSMUSG00000015405_ENSMUSG00000015405_Ace2_chrX:164139331-164188420	ENSMUSG00000015405	ENSMUSG00000015405	Ace2	chrX:164139331-164188420	protein_coding	0.219899	0.0654108	0.0879337	0.150414	0.0934446	0.0654315	0.108853	0.078178	0.174589	0.0412647	0.1002	0.0540493
ENSMUSG00000015437_ENSMUSG00000015437_Gzmb_chr14:56258855-56262260	ENSMUSG00000015437	ENSMUSG00000015437	Gzmb	chr14:56258855-56262260	protein_coding	0.136788	0.0578942	0.418174	0.113904	0.12375	0.173502	0.0959775	0.137782	0.143319	0.0546343	0.258666	0
ENSMUSG00000015441_ENSMUSG00000015441_Gzmf_chr14:56205265-56211407	ENSMUSG00000015441	ENSMUSG00000015441	Gzmf	chr14:56205265-56211407	protein_coding	0	0	0	0	0	0	0	0	0	0	0	0
ENSMUSG00000015443_ENSMUSG00000015443_Gzmn_chr14:56165796-56174596	ENSMUSG00000015443	ENSMUSG00000015443	Gzmn	chr14:56165796-56174596	protein_coding	0	0	0	0	0	0	0	0	0	0	0	0
ENSMUSG00000015451_ENSMUSG00000015451_C4a_chr17:34809091-34823464	ENSMUSG00000015451	ENSMUSG00000015451	C4a	chr17:34809091-34823464		6.6771	7.93766	7.83184	18.557	14.6755	21.6679	8.15409	6.18033	7.98417	9.43683	11.2093	12.567
ENSMUSG00000015452_ENSMUSG00000015452_Ager_chr17:34597861-34600934	ENSMUSG00000015452	ENSMUSG00000015452	Ager	chr17:34597861-34600934	protein_coding	0.427268	0.328886	0.741726	0.405067	0.466756	0.656337	0.740869	0.595633	0.757622	0.456872	0.204809	0.653411
ENSMUSG00000015461_ENSMUSG00000015461_Atf6b_chr17:34647145-34655074	ENSMUSG00000015461	ENSMUSG00000015461	Atf6b	chr17:34647145-34655074	protein_coding	10.4518	9.14409	9.75168	9.69823	11.5396	9.26141	10.0493	9.65659	10.2074	13.9686	13.3252	13.8593
ENSMUSG00000015467_ENSMUSG00000015467_Egfl8_chr17:34613348-34615971	ENSMUSG00000015467	ENSMUSG00000015467	Egfl8	chr17:34613348-34615971	protein_coding	1.31914	0.997492	0.991632	0.954228	1.31008	1.23767	0.920691	0.80186	0.461587	1.47305	1.24762	1.91767
ENSMUSG00000015468_ENSMUSG00000015468_Notch4_chr17:34564267-34588503	ENSMUSG00000015468	ENSMUSG00000015468	Notch4	chr17:34564267-34588503	protein_coding	5.72885	4.48309	7.05048	6.40261	11.0071	9.51485	8.07872	9.88419	9.6521	15.0594	17.5075	17.6719
ENSMUSG00000015474_ENSMUSG00000015474_Ppt2_chr17:34616661-34628510	ENSMUSG00000015474	ENSMUSG00000015474	Ppt2	chr17:34616661-34628510	protein_coding	28.358	25.4016	28.9683	23.0747	24.8601	24.4225	15.4866	12.146	12.9917	14.7087	11.3281	12.3716
ENSMUSG00000015476_ENSMUSG00000015476_Prrt1_chr17:34629532-34633126	ENSMUSG00000015476	ENSMUSG00000015476	Prrt1	chr17:34629532-34633126	protein_coding	0.866763	0.418076	0.523383	0.381587	0.683457	0.667078	0.539538	0.337687	0.323558	0.497032	0.538578	1.03251
ENSMUSG00000015478_ENSMUSG00000015478_Rnf5_chr17:34601090-34603690	ENSMUSG00000015478	ENSMUSG00000015478	Rnf5	chr17:34601090-34603690	protein_coding	32.8732	26.9562	32.3534	33.2274	33.7374	31.9645	36.7578	33.2463	36.5656	31.8391	26.087	27.9918
ENSMUSG00000015484_ENSMUSG00000015484_Fam163a_chr1:156075965-156205026	ENSMUSG00000015484	ENSMUSG00000015484	Fam163a	chr1:156075965-156205026	protein_coding	0	0	0	0	0	0	0	0	0	0.0180552	0	0
ENSMUSG00000015488_ENSMUSG00000015488_Cacfd1_chr2:27009925-27021089	ENSMUSG00000015488	ENSMUSG00000015488	Cacfd1	chr2:27009925-27021089	protein_coding	15.8547	14.6273	16.8286	14.6306	14.5621	14.9126	11.1311	13.2423	10.7837	11.1248	9.24769	9.29052
ENSMUSG00000015501_ENSMUSG00000015501_Hivep2_chr10:13966378-14151376	ENSMUSG00000015501	ENSMUSG00000015501	Hivep2	chr10:13966378-14151376	protein_coding	3.01019	2.74761	2.84491	3.73175	3.15389	3.1708	3.2572	3.75799	3.58048	2.1815	2.03201	2.5851
ENSMUSG00000015519_ENSMUSG00000015519_2310057J18Rik_chr10:28972287-28986303	ENSMUSG00000015519	ENSMUSG00000015519	2310057J18Rik	chr10:28972287-28986303	protein_coding	0	0	0	0	0	0	0	0	0	0	0	0
ENSMUSG00000015522_ENSMUSG00000015522_Arnt_chr3:95434387-95497240	ENSMUSG00000015522	ENSMUSG00000015522	Arnt	chr3:95434387-95497240	protein_coding	15.4342	13.0706	15.6749	18.3273	16.3721	16.0297	16.8097	14.3984	14.1827	20.3209	18.1158	19.8547
ENSMUSG00000015533_ENSMUSG00000015533_Itga2_chr13:114835915-114932041	ENSMUSG00000015533	ENSMUSG00000015533	Itga2	chr13:114835915-114932041	protein_coding	0.0413793	0.0524851	0.0988366	0.068978	0.1125	0.0700138	0	0.0836831	0.0651558	0.099367	0.203802	0.0206184
ENSMUSG00000015536_ENSMUSG00000015536_Mocs2_chr13:114818243-114829006	ENSMUSG00000015536	ENSMUSG00000015536	Mocs2	chr13:114818243-114829006	protein_coding	86.1733	81.8839	87.6244	86.3872	86.0041	90.5784	60.2657	63.3648	56.2582	62.9237	68.901	67.5351
ENSMUSG00000015542_ENSMUSG00000015542_Nat9_chr11:115182831-115187859	ENSMUSG00000015542	ENSMUSG00000015542	Nat9	chr11:115182831-115187859	protein_coding	33.292	27.4335	35.4301	28.2931	37.7326	31.8954	12.1106	8.71171	10.506	12.2623	9.12774	10.4304
ENSMUSG00000015568_ENSMUSG00000015568_Lpl_chr8:68880490-68907448	ENSMUSG00000015568	ENSMUSG00000015568	Lpl	chr8:68880490-68907448	protein_coding	794.848	726.916	831.972	1174.5	984.857	1039.05	1766.32	2013.37	1905.7	1340.53	1238.13	1216.46
ENSMUSG00000015575_ENSMUSG00000015575_Atp6v0e_chr17:26676395-26699644	ENSMUSG00000015575	ENSMUSG00000015575	Atp6v0e	chr17:26676395-26699644	protein_coding	89.7033	83.3818	89.783	95.6344	84.167	94.5072	123.658	124.262	132.553	98.756	101.042	90.9584
ENSMUSG00000015579_ENSMUSG00000015579_Nkx2-5_chr17:26838663-26841565	ENSMUSG00000015579	ENSMUSG00000015579	Nkx2-5	chr17:26838663-26841565	protein_coding	0	0	0	0	0	0	0	0	0	0	0	0
ENSMUSG00000015597_ENSMUSG00000015597_Zfp318_chr17:46383730-46420920	ENSMUSG00000015597	ENSMUSG00000015597	Zfp318	chr17:46383730-46420920	protein_coding	3.34771	4.12183	4.04212	3.63868	4.08371	3.51442	3.11743	2.71405	2.68679	2.69626	2.94365	3.69145
ENSMUSG00000015599_ENSMUSG00000015599_Ttbk1_chr17:46442447-46487675	ENSMUSG00000015599	ENSMUSG00000015599	Ttbk1	chr17:46442447-46487675	protein_coding	0.0245608	0.0311469	0.00838739	0.0102372	0.0222651	0.0207802	0.00864892	0	0	0.00983348	0.00930807	0.0122389
ENSMUSG00000015605_ENSMUSG00000015605_Srf_chr17:46546838-46556162	ENSMUSG00000015605	ENSMUSG00000015605	Srf	chr17:46546838-46556162	protein_coding	3.77605	4.18523	5.34282	5.08536	5.12329	4.65641	7.43286	6.85951	7.18847	10.5189	8.98756	11.5654
ENSMUSG00000015619_ENSMUSG00000015619_Gata3_chr2:9857077-9890034	ENSMUSG00000015619	ENSMUSG00000015619	Gata3	chr2:9857077-9890034	protein_coding	0.220468	0.186458	0.112764	0.206693	0.312709	0.18385	0.0193884	0.154097	0.0289198	0.176429	0.167018	0.219686
ENSMUSG00000015627_ENSMUSG00000015627_Gata5_chr2:180325132-180334699	ENSMUSG00000015627	ENSMUSG00000015627	Gata5	chr2:180325132-180334699	protein_coding	0	0	0	0	0	0	0	0	0	0	0	0
ENSMUSG00000015647_ENSMUSG00000015647_Lama5_chr2:180176372-180225859	ENSMUSG00000015647	ENSMUSG00000015647	Lama5	chr2:180176372-180225859	protein_coding	5.1309	4.44863	6.50185	3.92019	5.33708	3.08188	4.1997	7.3557	4.24658	6.8849	11.6704	7.29016
ENSMUSG00000015652_ENSMUSG00000015652_Steap1_chr5:5736316-5749326	ENSMUSG00000015652	ENSMUSG00000015652	Steap1	chr5:5736316-5749326	protein_coding	0.323771	0.342678	0.110342	0.799495	0.292778	0.273746	0.283738	0.814482	0.339215	0.452382	0.856761	0.644998
ENSMUSG00000015653_ENSMUSG00000015653_Steap2_chr5:5664830-5694578	ENSMUSG00000015653	ENSMUSG00000015653	Steap2	chr5:5664830-5694578	protein_coding	0.110379	0.30559	0.149933	0.182933	0.170862	0.237685	0.299885	0.304503	0.226826	0.27994	0.60657	0.803274
ENSMUSG00000015656_ENSMUSG00000015656_Hspa8_chr9:40800983-40805200	ENSMUSG00000015656	ENSMUSG00000015656	Hspa8	chr9:40800983-40805200	protein_coding	195.294	212.999	245.712	220.333	206.746	205.722	1394.54	1747.28	1664.87	899.491	1039.73	884.779
ENSMUSG00000015659_ENSMUSG00000015659_Serac1_chr17:6042195-6079741	ENSMUSG00000015659	ENSMUSG00000015659	Serac1	chr17:6042195-6079741	protein_coding	3.68912	3.0631	3.25841	4.01016	2.97623	2.99251	2.08993	2.66379	1.30456	2.32255	3.05281	2.46333
ENSMUSG00000015665_ENSMUSG00000015665_Awat1_chrX:100572250-100578205	ENSMUSG00000015665	ENSMUSG00000015665	Awat1	chrX:100572250-100578205	protein_coding	0	0	0	0	0	0	0	0	0	0	0	0
ENSMUSG00000015668_ENSMUSG00000015668_Pdzd11_chrX:100622882-100626568	ENSMUSG00000015668	ENSMUSG00000015668	Pdzd11	chrX:100622882-100626568	protein_coding	22.5845	20.1043	19.0797	18.5065	19.6582	20.4511	15.867	14.7809	16.2253	13.1402	13.2683	14.7701
ENSMUSG00000015671_ENSMUSG00000015671_Psma2_chr13:14613241-14625671	ENSMUSG00000015671	ENSMUSG00000015671	Psma2	chr13:14613241-14625671	protein_coding	80.9563	87.6219	80.4462	75.6689	73.8333	83.4219	87.6664	95.456	82.6783	87.8245	84.5402	87.6621
ENSMUSG00000015672_ENSMUSG00000015672_Mrpl32_chr13:14610300-14613037	ENSMUSG00000015672	ENSMUSG00000015672	Mrpl32	chr13:14610300-14613037	protein_coding	37.4413	35.6234	30.1173	30.2714	27.5259	30.7637	35.7016	37.0311	32.4863	31.6854	32.4634	31.6977
ENSMUSG00000015697_ENSMUSG00000015697_Setdb1_chr3:95323524-95357202	ENSMUSG00000015697	ENSMUSG00000015697	Setdb1	chr3:95323524-95357202	protein_coding	6.13564	6.49095	6.09208	6.56347	6.75019	6.13444	5.41183	5.29387	4.15293	6.11847	6.09566	6.12385
ENSMUSG00000015702_ENSMUSG00000015702_Anxa9_chr3:95296095-95307176	ENSMUSG00000015702	ENSMUSG00000015702	Anxa9	chr3:95296095-95307176	protein_coding	0.856769	0.895529	1.20039	0.881613	1.00018	0.895121	0.331405	0.457523	0.47555	0.322321	0.495903	0.350406
ENSMUSG00000015709_ENSMUSG00000015709_Arnt2_chr7:84246280-84409959	ENSMUSG00000015709	ENSMUSG00000015709	Arnt2	chr7:84246280-84409959	protein_coding	0.0430275	0.0485048	0	0.0239114	0.0260018	0.024269	0.0100998	0.0435305	0.0301191	0.0574183	0.0217405	0
ENSMUSG00000015711_ENSMUSG00000015711_Prune_chr3:95253673-95282076	ENSMUSG00000015711	ENSMUSG00000015711	Prune	chr3:95253673-95282076	protein_coding	6.95234	6.53972	7.90937	7.63085	7.98876	7.4113	7.40945	7.74042	7.88885	7.81242	7.49564	7.20121
ENSMUSG00000015714_ENSMUSG00000015714_Cers2_chr3:95314791-95323588	ENSMUSG00000015714	ENSMUSG00000015714	Cers2	chr3:95314791-95323588	protein_coding	95.6541	94.0842	101.848	104.509	98.9563	102.114	71.479	69.1687	65.4756	75.25	74.3394	76.0781
ENSMUSG00000015721_ENSMUSG00000015721_Nlrp5_chr7:23385888-23441922	ENSMUSG00000015721	ENSMUSG00000015721	Nlrp5	chr7:23385888-23441922	protein_coding	0	0	0	0	0	0	0	0	0	0	0	0
ENSMUSG00000015733_ENSMUSG00000015733_Capza2_chr6:17636233-17666972	ENSMUSG00000015733	ENSMUSG00000015733	Capza2	chr6:17636233-17666972	protein_coding	39.0916	46.8527	40.4657	36.0415	40.185	38.3789	51.9155	50.2699	44.2686	48.3104	45.4867	49.9455
ENSMUSG00000015745_ENSMUSG00000015745_Plekho1_chr3:95988428-95996001	ENSMUSG00000015745	ENSMUSG00000015745	Plekho1	chr3:95988428-95996001	protein_coding	10.5999	10.8172	13.6175	13.1618	13.4876	11.2886	9.49234	8.19935	9.24565	12.4068	17.2894	14.4466
ENSMUSG00000015747_ENSMUSG00000015747_Vps45_chr3:95999831-96058466	ENSMUSG00000015747	ENSMUSG00000015747	Vps45	chr3:95999831-96058466	protein_coding	3.44487	5.91443	7.27733	5.54593	3.98546	6.38865	3.08534	5.28695	5.3738	5.68419	2.72104	5.96444
ENSMUSG00000015748_ENSMUSG00000015748_Prpf3_chr3:95830123-95855885	ENSMUSG00000015748	ENSMUSG00000015748	Prpf3	chr3:95830123-95855885	protein_coding	7.85703	7.81589	6.67741	8.86789	9.4162	8.5639	8.66038	9.59533	8.02494	9.00099	9.63434	11.4208
ENSMUSG00000015749_ENSMUSG00000015749_Anp32e_chr3:95929245-95947390	ENSMUSG00000015749	ENSMUSG00000015749	Anp32e	chr3:95929245-95947390	protein_coding	27.5774	27.569	28.5867	26.8884	29.8651	27.826	44.4333	42.8543	47.7191	42.7685	34.8068	41.1174
ENSMUSG00000015750_ENSMUSG00000015750_Aph1a_chr3:95893968-95898288	ENSMUSG00000015750	ENSMUSG00000015750	Aph1a	chr3:95893968-95898288	protein_coding	56.5905	49.0639	59.4161	64.166	55.9881	61.5456	61.2768	53.5587	59.0737	57.921	52.6275	50.0205
ENSMUSG00000015755_ENSMUSG00000015755_Tab2_chr10:7905652-7956230	ENSMUSG00000015755	ENSMUSG00000015755	Tab2	chr10:7905652-7956230	protein_coding	15.0071	15.0977	14.9473	14.9158	14.9353	14.7953	17.1808	15.5569	16.4951	14.8184	17.0791	16.7775
ENSMUSG00000015757_ENSMUSG00000015757_Ppil4_chr10:7792890-7823135	ENSMUSG00000015757	ENSMUSG00000015757	Ppil4	chr10:7792890-7823135	protein_coding	6.78093	7.56354	6.40015	7.42056	7.35707	6.35788	7.69054	7.67083	7.7135	7.99308	8.1553	10.0282
ENSMUSG00000015759_ENSMUSG00000015759_Cnih_chr14:46775581-46788411	ENSMUSG00000015759	ENSMUSG00000015759	Cnih	chr14:46775581-46788411	protein_coding	26.6128	26.0994	24.8999	29.7131	27.4916	28.4628	24.4863	26.6867	25.5224	24.534	25.7427	26.1373
ENSMUSG00000015766_ENSMUSG00000015766_Eps8_chr6:137477244-137654876	ENSMUSG00000015766	ENSMUSG00000015766	Eps8	chr6:137477244-137654876	protein_coding	3.92411	4.61167	4.33177	6.74104	5.06923	4.0177	5.72563	5.50622	5.83301	8.73841	7.21498	8.86358
ENSMUSG00000015776_ENSMUSG00000015776_Med22_chr2:26905261-26910677	ENSMUSG00000015776	ENSMUSG00000015776	Med22	chr2:26905261-26910677	protein_coding	12.9604	12.0863	15.193	16.4151	15.3564	14.6849	10.9666	9.40896	12.8006	8.7458	8.77372	11.5569
ENSMUSG00000015787_ENSMUSG00000015787_Abo_chr2:26842502-26864979	ENSMUSG00000015787	ENSMUSG00000015787	Abo	chr2:26842502-26864979	protein_coding	0	0	0	0	0	0	0	0	0	0	0	0
ENSMUSG00000015790_ENSMUSG00000015790_Surf1_chr2:26913382-26916530	ENSMUSG00000015790	ENSMUSG00000015790	Surf1	chr2:26913382-26916530	protein_coding	52.0372	44.2774	46.0786	47.4764	48.3118	41.8593	34.4561	36.2402	30.5313	48.4904	40.8682	44.2392
ENSMUSG00000015804_ENSMUSG00000015804_Med28_chr5:45520220-45529276	ENSMUSG00000015804	ENSMUSG00000015804	Med28	chr5:45520220-45529276	protein_coding	41.1721	37.766	46.031	41.141	42.4494	39.3449	43.8143	47.3754	49.0118	41.5434	42.8051	48.9753
ENSMUSG00000015806_ENSMUSG00000015806_Qdpr_chr5:45434031-45450235	ENSMUSG00000015806	ENSMUSG00000015806	Qdpr	chr5:45434031-45450235	protein_coding	65.7717	63.7667	67.8463	68.3445	67.2352	70.9302	55.6797	59.7385	63.8	61.5198	54.779	50.6049
ENSMUSG00000015812_ENSMUSG00000015812_Gnrh1_chr14:67745228-67749435	ENSMUSG00000015812	ENSMUSG00000015812	Gnrh1	chr14:67745228-67749435	protein_coding	1.83834	0.446515	1.05131	1.52506	0.943743	1.55156	1.45551	1.30238	1.09238	1.24848	0.394533	0.261221
ENSMUSG00000015829_ENSMUSG00000015829_Tnr_chr1:159737509-159924397	ENSMUSG00000015829	ENSMUSG00000015829	Tnr	chr1:159737509-159924397	protein_coding	0	0	0	0	0	0	0	0	0	0	0	0
ENSMUSG00000015837_ENSMUSG00000015837_Sqstm1_chr11:50199365-50210827	ENSMUSG00000015837	ENSMUSG00000015837	Sqstm1	chr11:50199365-50210827	protein_coding	87.4039	83.807	97.9722	103.483	105.031	99.2668	131.174	132.067	129.313	127.874	147.734	143.504
ENSMUSG00000015839_ENSMUSG00000015839_Nfe2l2_chr2:75675512-75704641	ENSMUSG00000015839	ENSMUSG00000015839	Nfe2l2	chr2:75675512-75704641	protein_coding	23.5936	23.0746	23.6876	23.8706	24.4856	24.9332	34.416	31.1736	31.133	36.1467	34.7203	38.1788
ENSMUSG00000015843_ENSMUSG00000015843_Rxrg_chr1:167598383-167639623	ENSMUSG00000015843	ENSMUSG00000015843	Rxrg	chr1:167598383-167639623	protein_coding	16.4752	13.6295	16.4125	17.7089	18.9145	15.7347	22.8583	25.1731	25.8008	15.6147	16.299	15.3115
ENSMUSG00000015846_ENSMUSG00000015846_Rxra_chr2:27676439-27762957	ENSMUSG00000015846	ENSMUSG00000015846	Rxra	chr2:27676439-27762957	protein_coding	14.7982	13.2622	14.9386	18.0788	17.222	16.1521	14.605	14.2426	15.9268	11.407	11.6519	11.898
ENSMUSG00000015850_ENSMUSG00000015850_Adamtsl4_chr3:95676200-95687917	ENSMUSG00000015850	ENSMUSG00000015850	Adamtsl4	chr3:95676200-95687917	protein_coding	1.31768	1.21582	1.59206	2.89639	0.946628	3.50908	1.02782	1.52049	2.01963	2.24946	1.58932	1.39268
ENSMUSG00000015852_ENSMUSG00000015852_Fcrls_chr3:87250757-87263738	ENSMUSG00000015852	ENSMUSG00000015852	Fcrls	chr3:87250757-87263738	protein_coding	4.01174	4.42695	3.57942	4.24527	4.96277	5.35961	0.987422	1.33639	1.38847	1.92645	2.24906	1.87454
ENSMUSG00000015854_ENSMUSG00000015854_Cd5l_chr3:87357880-87371074	ENSMUSG00000015854	ENSMUSG00000015854	Cd5l	chr3:87357880-87371074	protein_coding	0.0452804	0	0.123316	0.188611	0.245993	0.0382978	0.12728	0	0.0474859	0.0362067	0.205675	0.135346
ENSMUSG00000015869_ENSMUSG00000015869_Prpsap1_chr11:116470844-116494202	ENSMUSG00000015869	ENSMUSG00000015869	Prpsap1	chr11:116470844-116494202	protein_coding	13.3459	15.055	15.6254	15.9244	17.0204	14.1327	12.5562	12.2682	12.4273	10.5226	12.8944	12.1798
ENSMUSG00000015879_ENSMUSG00000015879_Fam184b_chr5:45529705-45639501	ENSMUSG00000015879	ENSMUSG00000015879	Fam184b	chr5:45529705-45639501	protein_coding	0.0211757	0.0179062	0.057802	0.0352988	0.0191901	0.0179145	0	0	0.0222283	0.0169498	0.0320901	0
ENSMUSG00000015880_ENSMUSG00000015880_Ncapg_chr5:45669921-45700544	ENSMUSG00000015880	ENSMUSG00000015880	Ncapg	chr5:45669921-45700544	protein_coding	0.0949854	0.0401621	0.132587	0.138537	0.0860711	0.0401775	0.0334228	0	0.0249243	0.0795237	0.0179912	0.299145
ENSMUSG00000015882_ENSMUSG00000015882_Lcorl_chr5:45697180-45857615	ENSMUSG00000015882	ENSMUSG00000015882	Lcorl	chr5:45697180-45857615	protein_coding	2.19878	2.83339	3.82765	2.0462	2.28001	2.53888	1.74092	1.68749	2.40791	3.57423	2.23195	1.61509
[truncated: 36,742 more rows]

## Sheet: Diff expressed genes
tracking_id_gene_id_gene_short_name_locus	tracking_id	gene_id	gene_short_name	locus	Gene category	WT_Cold6Hr1	WT_Cold6Hr2	WT_Cold6Hr3	KO_Cold6Hr1	KO_Cold6Hr2	KO_Cold6Hr3	pval	padj	pass threshold?	adj_ave_WT_Cold6Hr	adj_ave_KO_cold6Hr	KO_cold6Hr/WT_Cold6Hr	log2(KO_cold6Hr/WT__Cold6Hr)	>=10?
[truncated: 10,405 more rows]
