# Supplementary material for: RNA Binding Protein Ybx2 Regulates RNA Stability During Cold-Induced Brown Fat Activation
Source: Oxford University Press journal article supplement (doi:10.2337/db17-0655), 2017-09-29
Supplement: db170655supplementarydata5.xlsx [file db170655supplementarydata5.xlsx]

## Sheet: Rip_WAT
tracking_id	gene_id	gene_short_name	locus	protein_coding?	WAT_YBX2_FPKM	WAT_IgG_FPKM	WAT_YBX2_FPKM+0.5	WAT_IgG_FPKM+0.5	Ybx2/IgG	Expression background in RNA-seq	IgG OR Ybx2>=5
ENSMUSG00000064349	ENSMUSG00000064349	mt-Tc	chrM:5191-5257		3493.75	0	3494.25	0.5	12.7708	#N/A	1
ENSMUSG00000000003	ENSMUSG00000000003	Pbsn	chrX:77837900-77853623	protein_coding	0	0	0.5	0.5	0	#N/A	0
ENSMUSG00000000028	ENSMUSG00000000028	Cdc45	chr16:18780446-18811987	protein_coding	1.67303	0.0375157	2.17303	0.537516	2.01533	Cdc45	0
ENSMUSG00000092687	ENSMUSG00000092687	Gm25744	chr17:34952012-34952075		797.434	5.28437e-38	797.934	0.5	10.6401	#N/A	1
ENSMUSG00000000037	ENSMUSG00000000037	Scml2	chrX:161117192-161258213	protein_coding	0	0	0.5	0.5	0	#N/A	0
ENSMUSG00000000049	ENSMUSG00000000049	Apoh	chr11:108343353-108414396	protein_coding	0.107161	0	0.607161	0.5	0.280151	#N/A	0
ENSMUSG00000064371	ENSMUSG00000064371	mt-Tt	chrM:15288-15355		549.503	0	550.003	0.5	10.1033	#N/A	1
ENSMUSG00000077303	ENSMUSG00000077303	Gm22472	chrX:101242737-101242871		328.931	0	329.431	0.5	9.36383	#N/A	1
ENSMUSG00000000078	ENSMUSG00000000078	Klf6	chr13:5861488-5870393	protein_coding	2.30112	0.220994	2.80112	0.720994	1.95794	Klf6	0
ENSMUSG00000064365	ENSMUSG00000064365	mt-Ts2	chrM:11612-11671		279.304	0	279.804	0.5	9.12827	#N/A	1
ENSMUSG00000093071	ENSMUSG00000093071	Gm25951	chr4:140717042-140717106		245.46	0	245.96	0.5	8.94228	#N/A	1
ENSMUSG00000000093	ENSMUSG00000000093	Tbx2	chr11:85832550-85841948	protein_coding	0.162585	0.667778	0.662585	1.16778	-0.817589	Tbx2	0
ENSMUSG00000000094	ENSMUSG00000000094	Tbx4	chr11:85886421-85916097	protein_coding	0.0670242	0.0266288	0.567024	0.526629	0.106624	#N/A	0
ENSMUSG00000000103	ENSMUSG00000000103	Zfy2	chrY:2106174-2170409	protein_coding	0	0	0.5	0.5	0	#N/A	0
ENSMUSG00000065904	ENSMUSG00000065904	Gm26109	chr18:34942643-34942713		219.595	0	220.095	0.5	8.78198	#N/A	1
ENSMUSG00000000125	ENSMUSG00000000125	Wnt3	chr11:103774149-103817957	protein_coding	0	0	0.5	0.5	0	#N/A	0
ENSMUSG00000000126	ENSMUSG00000000126	Wnt9a	chr11:59306927-59333552	protein_coding	0.21793	0.66146	0.71793	1.16146	-0.694024	Wnt9a	0
ENSMUSG00000000127	ENSMUSG00000000127	Fer	chr17:63896017-64139494	protein_coding	1.8421	0.288069	2.3421	0.788069	1.57141	#N/A	0
ENSMUSG00000093231	ENSMUSG00000093231	Gm25297	chr12:109320969-109321036		212.932	0	213.432	0.5	8.73763	#N/A	1
ENSMUSG00000084032	ENSMUSG00000084032	Gm12991	chr4:135377157-135377235		196.167	0	196.667	0.5	8.61961	#N/A	1
ENSMUSG00000000142	ENSMUSG00000000142	Axin2	chr11:108920348-108950783	protein_coding	0.555047	0	1.05505	0.5	1.07731	#N/A	0
ENSMUSG00000000148	ENSMUSG00000000148	Brat1	chr5:140705010-140719379	protein_coding	2.52364	1.15632	3.02364	1.65632	0.868305	Brat1	0
ENSMUSG00000080610	ENSMUSG00000080610	Snord110	chr2:130275505-130275573		190.823	0	191.323	0.5	8.57987	#N/A	1
ENSMUSG00000000154	ENSMUSG00000000154	Slc22a18	chr7:143473720-143499334	protein_coding	0.546561	0	1.04656	0.5	1.06566	#N/A	0
ENSMUSG00000000157	ENSMUSG00000000157	Itgb2l	chr16:96422287-96443619	protein_coding	0	0	0.5	0.5	0	#N/A	0
ENSMUSG00000000159	ENSMUSG00000000159	Igsf5	chr16:96361667-96525580	protein_coding	0	0	0.5	0.5	0	#N/A	0
ENSMUSG00000000167	ENSMUSG00000000167	Pih1d2	chr9:50617320-50625000	protein_coding	0	1.62437	0.5	2.12437	-2.08704	Pih1d2	0
ENSMUSG00000080478	ENSMUSG00000080478	Snord23	chr7:15938761-15938870		187.779	0	188.279	0.5	8.55673	#N/A	1
ENSMUSG00000093179	ENSMUSG00000093179	Gm23868	chrX:48342099-48342166		181.062	0	181.562	0.5	8.50432	#N/A	1
ENSMUSG00000000182	ENSMUSG00000000182	Fgf23	chr6:127072901-127081408	protein_coding	0.0753325	0	0.575333	0.5	0.202468	#N/A	0
ENSMUSG00000000183	ENSMUSG00000000183	Fgf6	chr6:127015541-127024718	protein_coding	0	0	0.5	0.5	0	#N/A	0
ENSMUSG00000065392	ENSMUSG00000065392	Gm25894	chr19:8724250-8724325		173.143	2.28645e-08	173.643	0.5	8.43998	#N/A	1
ENSMUSG00000065853	ENSMUSG00000065853	Gm22354	chr14:52069299-52069369		164.696	0	165.196	0.5	8.36803	#N/A	1
ENSMUSG00000000197	ENSMUSG00000000197	Nalcn	chr14:123276640-123627144	protein_coding	0	0	0.5	0.5	0	#N/A	0
ENSMUSG00000000202	ENSMUSG00000000202	Btbd17	chr11:114791216-114795945	protein_coding	0.022087	0	0.522087	0.5	0.0623621	#N/A	0
ENSMUSG00000000204	ENSMUSG00000000204	Slfn4	chr11:83175185-83190221	protein_coding	0.0294546	0	0.529455	0.5	0.0825789	#N/A	0
ENSMUSG00000000214	ENSMUSG00000000214	Th	chr7:142892751-142931128	protein_coding	0	0	0.5	0.5	0	#N/A	0
ENSMUSG00000000215	ENSMUSG00000000215	Ins2	chr7:142678655-142699510	protein_coding	0	0	0.5	0.5	0	#N/A	0
ENSMUSG00000000216	ENSMUSG00000000216	Scnn1g	chr7:121734478-121768475	protein_coding	0	0	0.5	0.5	0	#N/A	0
ENSMUSG00000000223	ENSMUSG00000000223	Drp2	chrX:134404550-134456573	protein_coding	0.0616481	0.0345549	0.561648	0.534555	0.0713284	#N/A	0
ENSMUSG00000000244	ENSMUSG00000000244	Tspan32	chr7:143005045-143019644	protein_coding	0	0	0.5	0.5	0	#N/A	0
ENSMUSG00000000247	ENSMUSG00000000247	Lhx2	chr2:38339280-38369733	protein_coding	0	0	0.5	0.5	0	#N/A	0
ENSMUSG00000000248	ENSMUSG00000000248	Clec2g	chr6:128934380-128984707	protein_coding	1.48388	0	1.98388	0.5	1.98832	#N/A	0
ENSMUSG00000000253	ENSMUSG00000000253	Gmpr	chr13:45507443-45546382	protein_coding	1.84085	3.96984	2.34085	4.46984	-0.933191	Gmpr	0
ENSMUSG00000000263	ENSMUSG00000000263	Glra1	chr11:55514237-55608198	protein_coding	0	0	0.5	0.5	0	#N/A	0
ENSMUSG00000000266	ENSMUSG00000000266	Mid2	chrX:140664598-140767715	protein_coding	2.32283	0.161275	2.82283	0.661275	2.09382	Mid2	0
ENSMUSG00000064366	ENSMUSG00000064366	mt-Tl2	chrM:11670-11741		153.448	0	153.948	0.5	8.2663	#N/A	1
ENSMUSG00000000276	ENSMUSG00000000276	Dgke	chr11:89035178-89066850	protein_coding	1.37837	0.416491	1.87837	0.916491	1.03529	Dgke	0
ENSMUSG00000096832	ENSMUSG00000096832	Mir3096	chr5:23710990-23711061		153.448	0	153.948	0.5	8.2663	#N/A	1
ENSMUSG00000088524	ENSMUSG00000088524	Snord2	chr16:23108952-23109021		131.116	5.58253e-56	131.616	0.5	8.04019	#N/A	1
ENSMUSG00000000290	ENSMUSG00000000290	Itgb2	chr10:77530251-77565708	protein_coding	0.333117	0	0.833117	0.5	0.736591	Itgb2	0
ENSMUSG00000000295	ENSMUSG00000000295	Hddc2	chr10:31313381-31328204	protein_coding	3.43109	0.314435	3.93109	0.814435	2.27106	Hddc2	0
ENSMUSG00000000296	ENSMUSG00000000296	Tpd52l1	chr10:31332379-31445921	protein_coding	0.280066	0.534074	0.780066	1.03407	-0.406671	Tpd52l1	0
ENSMUSG00000064500	ENSMUSG00000064500	Gm25296	chr11:48800865-48800932		126.038	0	126.538	0.5	7.98343	#N/A	1
ENSMUSG00000000303	ENSMUSG00000000303	Cdh1	chr8:106603350-106670246	protein_coding	0	0	0.5	0.5	0	#N/A	0
ENSMUSG00000000305	ENSMUSG00000000305	Cdh4	chr2:179442430-179899373	protein_coding	0	0	0.5	0.5	0	#N/A	0
ENSMUSG00000000308	ENSMUSG00000000308	Ckmt1	chr2:121357713-121363737	protein_coding	0	0	0.5	0.5	0	#N/A	0
ENSMUSG00000000317	ENSMUSG00000000317	Bcl6b	chr11:70224127-70229798	protein_coding	0.501448	0.0232791	1.00145	0.523279	0.936435	Bcl6b	0
ENSMUSG00000000318	ENSMUSG00000000318	Clec10a	chr11:70156196-70170834	protein_coding	1.399	2.01107	1.899	2.51107	-0.403062	Clec10a	0
ENSMUSG00000000320	ENSMUSG00000000320	Alox12	chr11:70241456-70255353	protein_coding	0.254977	0.30786	0.754977	0.80786	-0.0976726	#N/A	0
ENSMUSG00000000325	ENSMUSG00000000325	Arvcf	chr16:18348181-18407076	protein_coding	1.38268	1.13365	1.88268	1.63365	0.204689	Arvcf	0
ENSMUSG00000084516	ENSMUSG00000084516	Mir1902	chr2:104428860-104428940		113.784	0	114.284	0.5	7.83648	#N/A	1
ENSMUSG00000077527	ENSMUSG00000077527	Gm25506	chr8:85050206-85050276		109.797	0	110.297	0.5	7.78525	#N/A	1
ENSMUSG00000092655	ENSMUSG00000092655	Gm25238	chr19:60580528-60580617		109.329	0	109.829	0.5	7.77912	#N/A	1
ENSMUSG00000093006	ENSMUSG00000093006	Gm24157	chr11:52099057-52099153		105.557	0	106.057	0.5	7.7287	#N/A	1
ENSMUSG00000064390	ENSMUSG00000064390	Rnu73b	chr3:86140617-86140688		102.298	0	102.798	0.5	7.68367	#N/A	1
ENSMUSG00000000359	ENSMUSG00000000359	Rem1	chr2:152626950-152635198	protein_coding	0.124233	0	0.624233	0.5	0.320157	Rem1	0
ENSMUSG00000000365	ENSMUSG00000000365	Rnf17	chr14:56402696-56525032	protein_coding	0.0125704	0	0.51257	0.5	0.0358221	#N/A	0
ENSMUSG00000000374	ENSMUSG00000000374	Trappc10	chr10:78186724-78244642	protein_coding	4.4637	0.94835	4.9637	1.44835	1.77701	Trappc10	0
ENSMUSG00000084658	ENSMUSG00000084658	Gm22721	chr10:80382301-80382384		98.9461	0	99.4461	0.5	7.63584	#N/A	1
ENSMUSG00000000381	ENSMUSG00000000381	Wap	chr11:6635481-6638637	protein_coding	0	0	0.5	0.5	0	#N/A	0
ENSMUSG00000094179	ENSMUSG00000094179	Gm24428	chr9:88521796-88521868		95.4835	0	95.9835	0.5	7.58471	#N/A	1
ENSMUSG00000000385	ENSMUSG00000000385	Tmprss2	chr16:97564683-97611195	protein_coding	0.0208632	0.174138	0.520863	0.674138	-0.372139	#N/A	0
ENSMUSG00000000386	ENSMUSG00000000386	Mx1	chr16:97447034-97462907	protein_coding	0.353408	0.0596466	0.853408	0.559647	0.60872	#N/A	0
ENSMUSG00000000392	ENSMUSG00000000392	Fap	chr2:62500942-62574075	protein_coding	0.985078	0	1.48508	0.5	1.57054	Fap	0
ENSMUSG00000000394	ENSMUSG00000000394	Gcg	chr2:62474529-62483650	protein_coding	0	0	0.5	0.5	0	#N/A	0
ENSMUSG00000096191	ENSMUSG00000096191	Gm26135	chr9:88857692-88857764		95.4835	0	95.9835	0.5	7.58471	#N/A	1
ENSMUSG00000000402	ENSMUSG00000000402	Egfl6	chrX:166523006-166585720	protein_coding	0.0754689	0.0410158	0.575469	0.541016	0.0890672	#N/A	0
ENSMUSG00000000409	ENSMUSG00000000409	Lck	chr4:129548343-129573641	protein_coding	0.0990603	0	0.59906	0.5	0.260773	#N/A	0
ENSMUSG00000000411	ENSMUSG00000000411	Tssk3	chr4:129489013-129491022	protein_coding	0	0	0.5	0.5	0	#N/A	0
ENSMUSG00000000416	ENSMUSG00000000416	Cttnbp2	chr6:18366477-18515338	protein_coding	0	0	0.5	0.5	0	#N/A	0
ENSMUSG00000000420	ENSMUSG00000000420	Galnt1	chr18:24205343-24286818	protein_coding	4.37784	2.1524	4.87784	2.6524	0.878944	Galnt1	0
ENSMUSG00000000435	ENSMUSG00000000435	Myf5	chr10:107482907-107486134	protein_coding	0	0	0.5	0.5	0	#N/A	0
ENSMUSG00000093158	ENSMUSG00000093158	Gm25036	chr18:47154372-47154422		93.5725	0	94.0725	0.5	7.5557	#N/A	1
ENSMUSG00000077549	ENSMUSG00000077549	Snord71	chr8:109839294-109839379		89.1108	0	89.6108	0.5	7.4856	#N/A	1
ENSMUSG00000064441	ENSMUSG00000064441	Snord37	chr10:81178949-81179013		87.7427	0	88.2427	0.5	7.46341	#N/A	1
ENSMUSG00000000486	ENSMUSG00000000486	Sept1	chr7:127214446-127218498	protein_coding	2.83022	0	3.33022	0.5	2.73562	#N/A	0
ENSMUSG00000000489	ENSMUSG00000000489	Pdgfb	chr15:79995899-80014808	protein_coding	0.0453514	0.0270375	0.545351	0.527038	0.0492805	#N/A	0
ENSMUSG00000064797	ENSMUSG00000064797	Gm24357	chr9:15315521-15315595		83.6361	0	84.1361	0.5	7.39465	#N/A	1
ENSMUSG00000000531	ENSMUSG00000000531	Grasp	chr15:101224206-101232755	protein_coding	2.471	0.684337	2.971	1.18434	1.32687	Grasp	0
ENSMUSG00000000532	ENSMUSG00000000532	Acvr1b	chr15:101174103-101213678	protein_coding	1.08529	0.655957	1.58529	1.15596	0.455659	Acvr1b	0
ENSMUSG00000080469	ENSMUSG00000080469	Snord98	chr10:62765575-62765640		80.6522	0	81.1522	0.5	7.34256	#N/A	1
ENSMUSG00000000544	ENSMUSG00000000544	Gpa33	chr1:166130237-166166510	protein_coding	0	0	0.5	0.5	0	#N/A	0
ENSMUSG00000093009	ENSMUSG00000093009	Snord52	chr17:34950951-34951017		74.3351	0	74.8351	0.5	7.22564	#N/A	1
ENSMUSG00000064364	ENSMUSG00000064364	mt-Th	chrM:11545-11612		68.6879	0	69.1879	0.5	7.11245	#N/A	1
ENSMUSG00000000560	ENSMUSG00000000560	Gabra2	chr5:70961056-71095849	protein_coding	0.0121253	0.0100085	0.512125	0.510008	0.00597554	#N/A	0
ENSMUSG00000000561	ENSMUSG00000000561	Wdr77	chr3:105959368-105984600	protein_coding	1.73716	0.921161	2.23716	1.42116	0.654598	Wdr77	0
ENSMUSG00000000562	ENSMUSG00000000562	Adora3	chr3:105870857-105908928	protein_coding	0	0	0.5	0.5	0	#N/A	0
ENSMUSG00000075770	ENSMUSG00000075770	Gm22589	chr17:35242677-35242754		67.2773	0	67.7773	0.5	7.08273	#N/A	1
ENSMUSG00000000567	ENSMUSG00000000567	Sox9	chr11:112782223-112787760	protein_coding	0.394026	0.3383	0.894026	0.8383	0.0928502	Sox9	0
ENSMUSG00000087342	ENSMUSG00000087342	Gm12238	chr11:55482705-55482829		64.4085	0.000311618	64.9085	0.500312	7.01944	#N/A	1
ENSMUSG00000094403	ENSMUSG00000094403	Mir692-2a	chr4:125504748-125504857		61.2405	8.12943e-05	61.7405	0.500081	6.94791	#N/A	1
ENSMUSG00000081926	ENSMUSG00000081926	Gm15536	chr10:7038660-7038774		60.8306	0	61.3306	0.5	6.93854	#N/A	1
ENSMUSG00000065676	ENSMUSG00000065676	Snord42b	chr11:78183055-78183124		59.0322	0	59.5322	0.5	6.8956	#N/A	1
ENSMUSG00000000600	ENSMUSG00000000600	Krit1	chr5:3803164-3844515	protein_coding	0.373783	0.216497	0.873783	0.716497	0.286314	Krit1	0
ENSMUSG00000000605	ENSMUSG00000000605	Clcn4-2	chr7:7282315-7299511	protein_coding	4.1566	0.57518	4.6566	1.07518	2.1147	Clcn4-2	0
ENSMUSG00000000606	ENSMUSG00000000606	Vmn2r88	chr14:51411000-51419527	protein_coding	0	0	0.5	0.5	0	#N/A	0
ENSMUSG00000000617	ENSMUSG00000000617	Grm6	chr11:50850684-50866208	protein_coding	0	0	0.5	0.5	0	#N/A	0
ENSMUSG00000000627	ENSMUSG00000000627	Sema4f	chr6:82911884-82939769	protein_coding	0.33262	0.222945	0.83262	0.722945	0.203772	Sema4f	0
ENSMUSG00000065749	ENSMUSG00000065749	AF357428	chr12:109679944-109680013		59.0322	0	59.5322	0.5	6.8956	#N/A	1
ENSMUSG00000089308	ENSMUSG00000089308	Gm24837	chr4:41211501-41211582		55.1253	0	55.6253	0.5	6.79767	#N/A	1
ENSMUSG00000000632	ENSMUSG00000000632	Sez6	chr11:77930799-77979048	protein_coding	0	0	0.5	0.5	0	#N/A	0
ENSMUSG00000000673	ENSMUSG00000000673	Haao	chr17:83831355-83846790	protein_coding	0	0	0.5	0.5	0	#N/A	0
ENSMUSG00000000682	ENSMUSG00000000682	Cd52	chr4:134082447-134095082	protein_coding	1.18995	0	1.68995	0.5	1.75698	#N/A	0
ENSMUSG00000064514	ENSMUSG00000064514	Gm22455	chr9:64177122-64177193		51.1492	0	51.6492	0.5	6.69067	#N/A	1
ENSMUSG00000000690	ENSMUSG00000000690	Hoxb6	chr11:96292475-96301568	protein_coding	1.22176	0.303967	1.72176	0.803967	1.09868	Hoxb6	0
ENSMUSG00000000693	ENSMUSG00000000693	Loxl3	chr6:83034172-83052562	protein_coding	1.31056	1.29984	1.81056	1.79984	0.00856733	Loxl3	0
ENSMUSG00000000701	ENSMUSG00000000701	Tcl1b5	chr12:105176357-105181143	protein_coding	0	0	0.5	0.5	0	#N/A	0
ENSMUSG00000000706	ENSMUSG00000000706	Btn1a1	chr13:23456991-23465901	protein_coding	0.0575502	0.0556613	0.55755	0.555661	0.00489594	#N/A	0
ENSMUSG00000077625	ENSMUSG00000077625	Snord4a	chr11:78181685-78181756		51.1492	0	51.6492	0.5	6.69067	#N/A	1
ENSMUSG00000076038	ENSMUSG00000076038	Gm22774	chr17:6131835-6131944		50.7221	0.000148884	51.2221	0.500149	6.67826	#N/A	1
ENSMUSG00000000724	ENSMUSG00000000724	Cryba1	chr11:77718614-77725283	protein_coding	0	0	0.5	0.5	0	#N/A	0
ENSMUSG00000000730	ENSMUSG00000000730	Dnmt3l	chr10:78041946-78063622	protein_coding	0.561776	0	1.06178	0.5	1.08648	Dnmt3l	0
ENSMUSG00000000731	ENSMUSG00000000731	Aire	chr10:78030021-78043610	protein_coding	0	0.00401714	0.5	0.504017	-0.0115447	#N/A	0
ENSMUSG00000000732	ENSMUSG00000000732	Icosl	chr10:78069359-78079525	protein_coding	0.529806	0.0574279	1.02981	0.557428	0.885515	Icosl	0
ENSMUSG00000082460	ENSMUSG00000082460	Gm13685	chr2:83538534-83538675		50.0975	0	50.5975	0.5	6.66099	#N/A	1
ENSMUSG00000092966	ENSMUSG00000092966	Gm22240	chr19:47919191-47919273		48.0215	0	48.5215	0.5	6.60055	#N/A	1
ENSMUSG00000000759	ENSMUSG00000000759	Tubgcp3	chr8:12614276-12672248	protein_coding	2.48529	2.03322	2.98529	2.53322	0.236899	Tubgcp3	0
ENSMUSG00000000766	ENSMUSG00000000766	Oprm1	chr10:6758505-7038198	protein_coding	0	0	0.5	0.5	0	#N/A	0
ENSMUSG00000000776	ENSMUSG00000000776	Polr3d	chr14:70438747-70443471	protein_coding	3.62367	1.2812	4.12367	1.7812	1.21108	Polr3d	0
ENSMUSG00000000782	ENSMUSG00000000782	Tcf7	chr11:52252370-52283014	protein_coding	0.108126	0	0.608126	0.5	0.282442	#N/A	0
ENSMUSG00000076037	ENSMUSG00000076037	Gm22752	chr3:93433196-93433305		47.8513	0	48.3513	0.5	6.59548	#N/A	1
ENSMUSG00000000791	ENSMUSG00000000791	Il12rb1	chr8:70808448-70821424	protein_coding	0	0	0.5	0.5	0	#N/A	0
ENSMUSG00000000792	ENSMUSG00000000792	Slc5a5	chr8:70882888-70892757	protein_coding	0.0225943	0	0.522594	0.5	0.0637633	#N/A	0
ENSMUSG00000000794	ENSMUSG00000000794	Kcnn3	chr3:89520163-89667761	protein_coding	0.0688713	0	0.568871	0.5	0.186174	#N/A	0
ENSMUSG00000093216	ENSMUSG00000093216	Gm25247	chr7:36430610-36430700		47.7441	0	48.2441	0.5	6.59228	#N/A	1
ENSMUSG00000000805	ENSMUSG00000000805	Car4	chr11:84957785-84966044	protein_coding	4.17943	0	4.67943	0.5	3.22633	Car4	0
ENSMUSG00000000811	ENSMUSG00000000811	Txnrd3	chr6:89643987-89675529	protein_coding	1.23842	0.670448	1.73842	1.17045	0.570716	Txnrd3	0
ENSMUSG00000000817	ENSMUSG00000000817	Fasl	chr1:161780690-161788495	protein_coding	0	0	0.5	0.5	0	#N/A	0
ENSMUSG00000064417	ENSMUSG00000064417	DQ267102	chr12:109656344-109656416		47.7417	0	48.2417	0.5	6.59221	#N/A	1
ENSMUSG00000093245	ENSMUSG00000093245	Mir677	chr10:128085288-128085360		47.7417	0	48.2417	0.5	6.59221	#N/A	1
ENSMUSG00000065680	ENSMUSG00000065680	Snord38a	chr4:117154513-117154584		45.3365	8.27001e-13	45.8365	0.5	6.51842	#N/A	1
ENSMUSG00000000838	ENSMUSG00000000838	Fmr1	chrX:68678540-68717963	protein_coding	3.12972	2.34806	3.62972	2.84806	0.349879	Fmr1	0
ENSMUSG00000000861	ENSMUSG00000000861	Bcl11a	chr11:24078055-24174123	protein_coding	0.00699512	0.00470572	0.506995	0.504706	0.00652942	#N/A	0
ENSMUSG00000000869	ENSMUSG00000000869	Il4	chr11:53602981-53618669	protein_coding	0	0	0.5	0.5	0	#N/A	0
ENSMUSG00000065782	ENSMUSG00000065782	Gm22680	chr19:8725340-8725409		44.7033	0	45.2033	0.5	6.49836	#N/A	1
ENSMUSG00000000881	ENSMUSG00000000881	Dlg3	chrX:100767721-100818410	protein_coding	1.84305	0.283749	2.34305	0.783749	1.57992	Dlg3	0
ENSMUSG00000000884	ENSMUSG00000000884	Gnb1l	chr16:18498767-18566679	protein_coding	0.630554	0	1.13055	0.5	1.17703	Gnb1l	0
ENSMUSG00000000889	ENSMUSG00000000889	Dbh	chr2:27165232-27183200	protein_coding	0	0	0.5	0.5	0	#N/A	0
ENSMUSG00000000901	ENSMUSG00000000901	Mmp11	chr10:75923221-75932502	protein_coding	4.21014	2.91055	4.71014	3.41055	0.465766	Mmp11	0
ENSMUSG00000094392	ENSMUSG00000094392	Gm3788	chr3:86672032-86672168		39.1937	0	39.6937	0.5	6.31084	#N/A	1
ENSMUSG00000000903	ENSMUSG00000000903	Vpreb3	chr10:75943056-75949657	protein_coding	0.523101	0	1.0231	0.5	1.03295	Vpreb3	0
ENSMUSG00000000915	ENSMUSG00000000915	Hip1r	chr5:123973627-124003211	protein_coding	1.48176	1.12244	1.98176	1.62244	0.288617	Hip1r	0
ENSMUSG00000000916	ENSMUSG00000000916	Nsun5	chr5:135369952-135376805	protein_coding	3.30796	4.46436	3.80796	4.96436	-0.382589	Nsun5	0
ENSMUSG00000000934	ENSMUSG00000000934	Top1mt	chr15:75657034-75678800	protein_coding	2.36019	0.554216	2.86019	1.05422	1.43994	Top1mt	0
ENSMUSG00000000938	ENSMUSG00000000938	Hoxa10	chr6:52231196-52240854	protein_coding	2.68233	0.739139	3.18233	1.23914	1.36075	#N/A	0
ENSMUSG00000000942	ENSMUSG00000000942	Hoxa4	chr6:52189670-52191753	protein_coding	2.51611	0	3.01611	0.5	2.59269	Hoxa4	0
ENSMUSG00000000948	ENSMUSG00000000948	Snrpn	chr7:59982494-60140219	protein_coding	3.46128	0.486893	3.96128	0.986893	2.005	Snrpn	0
ENSMUSG00000077797	ENSMUSG00000077797	Snord19	chr14:31016205-31016281		36.8694	0	37.3694	0.5	6.22379	#N/A	1
ENSMUSG00000000958	ENSMUSG00000000958	Slc7a7	chr14:54369443-54409472	protein_coding	0.944483	0	1.44448	0.5	1.53055	Slc7a7	0
ENSMUSG00000077756	ENSMUSG00000077756	Snord90	chr2:37400046-37400157		36.3167	0	36.8167	0.5	6.20229	#N/A	1
ENSMUSG00000000976	ENSMUSG00000000976	Heatr6	chr11:83753695-83783754	protein_coding	1.92148	0.286786	2.42148	0.786786	1.62185	Heatr6	0
ENSMUSG00000000982	ENSMUSG00000000982	Ccl3	chr11:83647843-83649355	protein_coding	0	0	0.5	0.5	0	#N/A	0
ENSMUSG00000000983	ENSMUSG00000000983	Wfdc18	chr11:83709014-83711348	protein_coding	0	0	0.5	0.5	0	#N/A	0
ENSMUSG00000001014	ENSMUSG00000001014	Icam4	chr9:21029372-21030531	protein_coding	0	0	0.5	0.5	0	#N/A	0
ENSMUSG00000001016	ENSMUSG00000001016	Ilf2	chr3:90476200-90488379	protein_coding	3.09526	0.123003	3.59526	0.623003	2.52879	Ilf2	0
ENSMUSG00000092647	ENSMUSG00000092647	Gm22234	chr12:109319451-109319516		34.9493	0	35.4493	0.5	6.14769	#N/A	1
ENSMUSG00000083863	ENSMUSG00000083863	Gm13341	chr2:22587290-22587962		172.747	1.98627	173.247	2.48627	6.1227	#N/A	1
ENSMUSG00000001020	ENSMUSG00000001020	S100a4	chr3:90603769-90606045	protein_coding	1.58971	1.16057	2.08971	1.66057	0.331624	S100a4	0
ENSMUSG00000001021	ENSMUSG00000001021	S100a3	chr3:90600214-90602702	protein_coding	0	0	0.5	0.5	0	#N/A	0
ENSMUSG00000001023	ENSMUSG00000001023	S100a5	chr3:90608522-90611780	protein_coding	0	0	0.5	0.5	0	#N/A	0
ENSMUSG00000096841	ENSMUSG00000096841	Gm25596	chr10:29349584-29349691		33.7802	0	34.2802	0.5	6.0993	#N/A	1
ENSMUSG00000001027	ENSMUSG00000001027	Scn4a	chr11:106318591-106349389	protein_coding	0	0	0.5	0.5	0	#N/A	0
ENSMUSG00000001027	ENSMUSG00000001027	Scn4a	chr11:106349454-106353288	protein_coding	0	0	0.5	0.5	0	#N/A	0
ENSMUSG00000001029	ENSMUSG00000001029	Icam2	chr11:106377655-106388075	protein_coding	0.497703	0	0.997703	0.5	0.996682	Icam2	0
ENSMUSG00000001034	ENSMUSG00000001034	Mapk7	chr11:61488811-61494406	protein_coding	1.2471	2.30144	1.7471	2.80144	-0.681206	Mapk7	0
ENSMUSG00000001036	ENSMUSG00000001036	Epn2	chr11:61517248-61579687	protein_coding	3.43917	2.42144	3.93917	2.92144	0.431212	Epn2	0
ENSMUSG00000001039	ENSMUSG00000001039	B9d1	chr11:61505143-61512931	protein_coding	0.654284	0	1.15428	0.5	1.207	B9d1	0
ENSMUSG00000092887	ENSMUSG00000092887	Snord53	chr17:71640878-71640956		32.6945	0	33.1945	0.5	6.05287	#N/A	1
ENSMUSG00000001053	ENSMUSG00000001053	N4bp3	chr11:51643062-51650842	protein_coding	0.344482	0.303631	0.844482	0.803631	0.0715335	N4bp3	0
ENSMUSG00000093562	ENSMUSG00000093562	Gm23090	chr4:41213775-41213853		32.6945	0	33.1945	0.5	6.05287	#N/A	1
ENSMUSG00000073616	ENSMUSG00000073616	Myeov2	chr1:92637144-92641985	protein_coding	47.6791	0.254012	48.1791	0.754012	5.99768	Myeov2	1
ENSMUSG00000001076	ENSMUSG00000001076	C1ql4	chr15:99084685-99087817	protein_coding	0	0	0.5	0.5	0	#N/A	0
ENSMUSG00000001082	ENSMUSG00000001082	Mfsd10	chr5:34633641-34637212	protein_coding	3.84877	2.21044	4.34877	2.71044	0.68208	Mfsd10	0
ENSMUSG00000001089	ENSMUSG00000001089	Luzp1	chr4:136469760-136554780	protein_coding	3.77751	0.764759	4.27751	1.26476	1.75791	Luzp1	0
ENSMUSG00000001095	ENSMUSG00000001095	Slc13a2	chr11:78397086-78422217	protein_coding	0.0277348	0	0.527735	0.5	0.077885	#N/A	0
ENSMUSG00000077948	ENSMUSG00000077948	Gm23438	chr14:10458177-10458271		30.8932	0	31.3932	0.5	5.97238	#N/A	1
ENSMUSG00000088689	ENSMUSG00000088689	Scarna17	chr18:74778390-74778469		30.8474	0	31.3474	0.5	5.97027	#N/A	1
ENSMUSG00000001103	ENSMUSG00000001103	Sebox	chr11:78503448-78505081	protein_coding	0	0	0.5	0.5	0	#N/A	0
ENSMUSG00000077577	ENSMUSG00000077577	Gm24890	chr14:70428495-70428597		30.8464	0	31.3464	0.5	5.97023	#N/A	1
ENSMUSG00000076999	ENSMUSG00000076999	Gm22426	chr1:105574686-105574782		30.7873	0	31.2873	0.5	5.96751	#N/A	1
ENSMUSG00000001120	ENSMUSG00000001120	Pcbp3	chr10:76761856-76961887	protein_coding	4.08701	2.59914	4.58701	3.09914	0.565686	Pcbp3	0
ENSMUSG00000079941	ENSMUSG00000079941	Gm11273	chr13:21501028-21501418	protein_coding	30.6606	0.00127695	31.1606	0.501277	5.95797	#N/A	1
ENSMUSG00000077515	ENSMUSG00000077515	Gm25878	chr2:167063472-167063565		30.1699	0	30.6699	0.5	5.93875	#N/A	1
ENSMUSG00000001128	ENSMUSG00000001128	Cfp	chrX:20925453-20931555	protein_coding	0.46376	2.91352	0.96376	3.41352	-1.82451	Cfp	0
ENSMUSG00000090187	ENSMUSG00000090187	AK157302	chr13:21495305-21495695		30.1675	1.44096e-06	30.6675	0.500001	5.93863	#N/A	1
ENSMUSG00000001134	ENSMUSG00000001134	Uxt	chrX:20941721-20962017	protein_coding	3.61696	2.74029	4.11696	3.24029	0.345456	Uxt	0
ENSMUSG00000001138	ENSMUSG00000001138	Cnnm3	chr1:36511866-36528237	protein_coding	3.62902	0.423411	4.12902	0.923411	2.16075	Cnnm3	0
ENSMUSG00000081376	ENSMUSG00000081376	Gm11694	chr11:115493023-115493182		29.8132	0	30.3132	0.5	5.92187	#N/A	1
ENSMUSG00000001150	ENSMUSG00000001150	Mcm3ap	chr10:76468970-76515856	protein_coding	3.42847	1.35886	3.92847	1.85886	1.07955	Mcm3ap	0
ENSMUSG00000001151	ENSMUSG00000001151	Pcnt	chr10:76351253-76442912	protein_coding	0.864521	0.543488	1.36452	1.04349	0.386981	Pcnt	0
ENSMUSG00000001155	ENSMUSG00000001155	Ftcd	chr10:76575647-76590338	protein_coding	0	0	0.5	0.5	0	#N/A	0
ENSMUSG00000001156	ENSMUSG00000001156	Mxd1	chr6:86647043-86669159	protein_coding	1.99093	0.348654	2.49093	0.848654	1.55344	Mxd1	0
ENSMUSG00000001157	ENSMUSG00000001157	Gmcl1	chr6:86691767-86733378	protein_coding	2.74762	0.0825999	3.24762	0.5826	2.47881	Gmcl1	0
ENSMUSG00000096830	ENSMUSG00000096830	Gm26231	chr9:20035153-20035220		29.7647	0	30.2647	0.5	5.91956	#N/A	1
ENSMUSG00000001166	ENSMUSG00000001166	Oas1c	chr5:120800193-120812514	protein_coding	0.644884	0	1.14488	0.5	1.1952	#N/A	0
ENSMUSG00000001168	ENSMUSG00000001168	Oas1h	chr5:120861420-120873512	protein_coding	0	0	0.5	0.5	0	#N/A	0
ENSMUSG00000001173	ENSMUSG00000001173	Ocrl	chrX:47912386-47965868	protein_coding	2.26501	0.288961	2.76501	0.788961	1.80926	Ocrl	0
ENSMUSG00000076030	ENSMUSG00000076030	Gm22750	chr13:8921335-8921438		29.4033	0	29.9033	0.5	5.90223	#N/A	1
ENSMUSG00000084289	ENSMUSG00000084289	Gm6977	chrX:90744545-90745062		26.9193	0	27.4193	0.5	5.77712	#N/A	1
ENSMUSG00000001225	ENSMUSG00000001225	Slc26a3	chr12:31390870-31473917	protein_coding	0.108039	0.582249	0.608039	1.08225	-0.831797	#N/A	0
ENSMUSG00000001227	ENSMUSG00000001227	Sema6b	chr17:56123084-56140343	protein_coding	0.788025	1.73317	1.28802	2.23317	-0.793932	Sema6b	0
ENSMUSG00000001228	ENSMUSG00000001228	Uhrf1	chr17:56303320-56323486	protein_coding	1.64516	0.16162	2.14516	0.66162	1.69701	Uhrf1	0
ENSMUSG00000064358	ENSMUSG00000064358	mt-Co3	chrM:8606-9390	protein_coding	2438.39	44.49	2438.89	44.99	5.76048	#N/A	1
ENSMUSG00000093371	ENSMUSG00000093371	Gm24450	chr10:80501809-80501911		25.7054	0	26.2054	0.5	5.71179	#N/A	1
ENSMUSG00000001247	ENSMUSG00000001247	Lsr	chr7:30957776-30983169	protein_coding	0.0716387	0	0.571639	0.5	0.193175	Lsr	0
ENSMUSG00000093921	ENSMUSG00000093921	Gm23864	chr17:35699202-35699309		25.3351	0	25.8351	0.5	5.69126	#N/A	1
ENSMUSG00000001249	ENSMUSG00000001249	Hpn	chr7:31098724-31115290	protein_coding	0.158433	0	0.658433	0.5	0.397109	#N/A	0
ENSMUSG00000001260	ENSMUSG00000001260	Gabrg1	chr5:70751046-70842617	protein_coding	0	0	0.5	0.5	0	#N/A	0
ENSMUSG00000001270	ENSMUSG00000001270	Ckb	chr12:111669354-111672338	protein_coding	4.0552	0.786886	4.5552	1.28689	1.82363	Ckb	0
ENSMUSG00000084751	ENSMUSG00000084751	Mir1894	chr17:35917888-35917969		25.2538	0	25.7538	0.5	5.68671	#N/A	1
ENSMUSG00000001281	ENSMUSG00000001281	Itgb7	chr15:102215994-102231935	protein_coding	0	0.563242	0.5	1.06324	-1.08847	#N/A	0
ENSMUSG00000092076	ENSMUSG00000092076	Gm4482	chr6:122792580-122792775		23.5988	0	24.0988	0.5	5.59089	#N/A	1
ENSMUSG00000001288	ENSMUSG00000001288	Rarg	chr15:102234937-102257517	protein_coding	2.58415	0.233099	3.08415	0.733099	2.07279	Rarg	0
ENSMUSG00000077702	ENSMUSG00000077702	Gm24067	chr9:20889483-20889568		22.2776	0	22.7776	0.5	5.50954	#N/A	1
ENSMUSG00000001300	ENSMUSG00000001300	Efnb2	chr8:8617433-8660773	protein_coding	1.01978	0	1.51978	0.5	1.60386	Efnb2	0
ENSMUSG00000001305	ENSMUSG00000001305	Rrp15	chr1:186720977-186749358	protein_coding	1.01892	0.0634979	1.51892	0.563498	1.43056	Rrp15	0
ENSMUSG00000001313	ENSMUSG00000001313	Rnd2	chr11:101464998-101471853	protein_coding	1.82665	2.24686	2.32665	2.74686	-0.239529	Rnd2	0
ENSMUSG00000064357	ENSMUSG00000064357	mt-Atp6	chrM:7926-8607	protein_coding	892.61	19.6698	893.11	20.1698	5.46857	#N/A	1
ENSMUSG00000001333	ENSMUSG00000001333	Sync	chr4:129287616-129308559	protein_coding	0.0662809	0.243272	0.566281	0.743272	-0.392372	Sync	0
ENSMUSG00000001334	ENSMUSG00000001334	Fndc5	chr4:129136998-129144593	protein_coding	0.21616	0	0.71616	0.5	0.518354	Fndc5	0
ENSMUSG00000001348	ENSMUSG00000001348	Acp5	chr9:22126730-22135746	protein_coding	2.75013	1.19183	3.25013	1.69183	0.941913	Acp5	0
ENSMUSG00000001349	ENSMUSG00000001349	Cnn1	chr9:22099280-22109630	protein_coding	0.0848505	0.269773	0.58485	0.769773	-0.396365	#N/A	0
ENSMUSG00000089498	ENSMUSG00000089498	Gm26359	chr10:67235860-67235961		21.4071	0	21.9071	0.5	5.45333	#N/A	1
ENSMUSG00000001376	ENSMUSG00000001376	Ccdc132	chr6:3498392-3603531	protein_coding	2.25236	0.907433	2.75236	1.40743	0.967603	Ccdc132	0
ENSMUSG00000001379	ENSMUSG00000001379	Apbb3	chr18:36671159-36679366	protein_coding	0.689074	3.12958	1.18907	3.62958	-1.60996	Apbb3	0
ENSMUSG00000083892	ENSMUSG00000083892	Gm1848	chrX:21146842-21147640		21.2413	0	21.7413	0.5	5.44237	#N/A	1
ENSMUSG00000001383	ENSMUSG00000001383	Zmat2	chr18:36793922-36799660	protein_coding	3.57232	1.77462	4.07232	2.27462	0.840225	Zmat2	0
ENSMUSG00000001403	ENSMUSG00000001403	Ube2c	chr2:164769897-164778822	protein_coding	1.24965	0.00455354	1.74965	0.504554	1.79399	Ube2c	0
ENSMUSG00000087790	ENSMUSG00000087790	Gm25970	chr12:65056572-65056658		21.1624	0	21.6624	0.5	5.43712	#N/A	1
ENSMUSG00000080941	ENSMUSG00000080941	Gm16056	chr5:26859966-26860101		20.9901	0	21.4901	0.5	5.4256	#N/A	1
ENSMUSG00000001417	ENSMUSG00000001417	Rhbg	chr3:88242873-88287210	protein_coding	0	0	0.5	0.5	0	#N/A	0
ENSMUSG00000064356	ENSMUSG00000064356	mt-Atp8	chrM:7765-7969	protein_coding	1294.51	30.1659	1295.01	30.6659	5.40018	#N/A	1
ENSMUSG00000072837	ENSMUSG00000072837	Mir546	chr10:126998439-126998560		20.1092	0	20.6092	0.5	5.36522	#N/A	1
ENSMUSG00000001420	ENSMUSG00000001420	Tmem79	chr3:88328654-88334504	protein_coding	1.87819	0.51061	2.37819	1.01061	1.23464	Tmem79	0
ENSMUSG00000078249	ENSMUSG00000078249	Hmga1-rs1	chr11:120762793-120764392	protein_coding	41.3467	0.541112	41.8467	1.04111	5.32892	Hmga1-rs1	1
ENSMUSG00000076137	ENSMUSG00000076137	Gm26384	chr17:21284102-21284212		268.825	6.21757	269.325	6.71757	5.32526	#N/A	1
ENSMUSG00000065592	ENSMUSG00000065592	Mir145	chr18:61647815-61647903		19.1396	0	19.6396	0.5	5.29569	#N/A	1
ENSMUSG00000056412	ENSMUSG00000056412	Gm12396	chr4:40775132-40775725		18.7728	0	19.2728	0.5	5.26849	#N/A	1
ENSMUSG00000084079	ENSMUSG00000084079	Gm11631	chr11:98063887-98064043		18.7721	0	19.2721	0.5	5.26844	#N/A	1
ENSMUSG00000001444	ENSMUSG00000001444	Tbx21	chr11:97098070-97115331	protein_coding	0	0	0.5	0.5	0	#N/A	0
ENSMUSG00000077571	ENSMUSG00000077571	Snora36b	chr1:185242906-185243038		18.5125	0	19.0125	0.5	5.24888	#N/A	1
ENSMUSG00000025488	ENSMUSG00000025488	Cox8b	chr7:140898942-140900446	protein_coding	18.4333	0	18.9333	0.5	5.24285	Cox8b	1
ENSMUSG00000031012	ENSMUSG00000031012	Cask	chrX:13517079-13851367	protein_coding	28.6032	0.273938	29.1032	0.773938	5.23282	Cask	1
ENSMUSG00000001493	ENSMUSG00000001493	Meox1	chr11:101877509-101894374	protein_coding	0.120734	0	0.620734	0.5	0.312047	#N/A	0
ENSMUSG00000001494	ENSMUSG00000001494	Sost	chr11:101962457-101967015	protein_coding	0	0	0.5	0.5	0	#N/A	0
ENSMUSG00000001496	ENSMUSG00000001496	Nkx2-1	chr12:56531957-56536908	protein_coding	0.0439727	0.0569939	0.543973	0.556994	-0.0341273	#N/A	0
ENSMUSG00000001497	ENSMUSG00000001497	Pax9	chr12:56691766-56712822	protein_coding	0.05818	0.0346342	0.55818	0.534634	0.0621783	#N/A	0
ENSMUSG00000093263	ENSMUSG00000093263	Gm23414	chr11:67024835-67024929		18.1302	0	18.6302	0.5	5.21957	#N/A	1
ENSMUSG00000064354	ENSMUSG00000064354	mt-Co2	chrM:7012-7696	protein_coding	1185.97	31.6301	1186.47	32.1301	5.20661	#N/A	1
ENSMUSG00000001507	ENSMUSG00000001507	Itga3	chr11:95044473-95076801	protein_coding	1.57677	1.16658	2.07677	1.66658	0.317451	Itga3	0
ENSMUSG00000001508	ENSMUSG00000001508	Sgca	chr11:94962790-94976327	protein_coding	0.909527	0	1.40953	0.5	1.49521	#N/A	0
ENSMUSG00000001510	ENSMUSG00000001510	Dlx3	chr11:95120088-95125296	protein_coding	0.353243	0	0.853243	0.5	0.771029	#N/A	0
ENSMUSG00000001517	ENSMUSG00000001517	Foxm1	chr6:128362966-128375893	protein_coding	0.464375	0.569417	0.964375	1.06942	-0.149158	#N/A	0
ENSMUSG00000001518	ENSMUSG00000001518	Itfg2	chr6:128409443-128424931	protein_coding	1.1563	0.0348494	1.6563	0.534849	1.63076	Itfg2	0
ENSMUSG00000001520	ENSMUSG00000001520	Nrip2	chr6:128399295-128408932	protein_coding	0.475067	0.14183	0.975067	0.64183	0.60331	Nrip2	0
ENSMUSG00000064748	ENSMUSG00000064748	n-R5s28	chr17:47848833-47848952		32.9948	0.427537	33.4948	0.927537	5.17439	#N/A	1
ENSMUSG00000001524	ENSMUSG00000001524	Gtf2h4	chr17:35667729-35673739	protein_coding	3.93573	1.88662	4.43573	2.38662	0.894203	Gtf2h4	0
ENSMUSG00000059252	ENSMUSG00000059252	Tpt1-ps5	chr9:37696514-37697033		45.0489	0.764782	45.5489	1.26478	5.17046	#N/A	1
ENSMUSG00000001542	ENSMUSG00000001542	Ell2	chr13:75707483-75772356	protein_coding	3.76293	0.49943	4.26293	0.99943	2.09267	Ell2	0
ENSMUSG00000001552	ENSMUSG00000001552	Jup	chr11:100368957-100397763	protein_coding	4.19576	0.957207	4.69576	1.45721	1.68815	Jup	0
ENSMUSG00000070934	ENSMUSG00000070934	Rraga	chr4:86575672-86577281	protein_coding	19.1499	0.0511829	19.6499	0.551183	5.15585	Rraga	1
ENSMUSG00000001558	ENSMUSG00000001558	Klhl10	chr11:100441916-100457022	protein_coding	0.0798263	0.760894	0.579826	1.26089	-1.12075	#N/A	0
ENSMUSG00000001566	ENSMUSG00000001566	Mnx1	chr5:29473037-29478519	protein_coding	0	0	0.5	0.5	0	#N/A	0
ENSMUSG00000001569	ENSMUSG00000001569	Nom1	chr5:29434663-29453506	protein_coding	1.74352	0.27732	2.24352	0.77732	1.52918	Nom1	0
ENSMUSG00000031360	ENSMUSG00000031360	Ctps2	chrX:162901237-163032508	protein_coding	17.2829	0	17.7829	0.5	5.15242	Ctps2	1
ENSMUSG00000001583	ENSMUSG00000001583	Tnk1	chr11:69851004-69858730	protein_coding	0.518522	0.116553	1.01852	0.616553	0.72418	#N/A	0
ENSMUSG00000001588	ENSMUSG00000001588	Acap1	chr11:69881566-69895539	protein_coding	0.0222349	0	0.522235	0.5	0.0627708	#N/A	0
ENSMUSG00000001604	ENSMUSG00000001604	Tcea3	chr4:136247728-136274898	protein_coding	0.85235	0.932346	1.35235	1.43235	-0.0829115	#N/A	0
ENSMUSG00000001622	ENSMUSG00000001622	Csn3	chr5:87925578-87932665	protein_coding	0.0474321	0.136663	0.547432	0.636663	-0.21785	#N/A	0
ENSMUSG00000060572	ENSMUSG00000060572	Mfap2	chr4:141010417-141015984	protein_coding	16.8882	0	17.3882	0.5	5.12004	Mfap2	1
ENSMUSG00000001630	ENSMUSG00000001630	Stk38l	chr6:146724994-146778812	protein_coding	1.73739	0.953374	2.23739	1.45337	0.622411	Stk38l	0
ENSMUSG00000001632	ENSMUSG00000001632	Brpf1	chr6:113307180-113324857	protein_coding	2.8764	0.325626	3.3764	0.825626	2.03193	Brpf1	0
ENSMUSG00000078087	ENSMUSG00000078087	Rps12l1	chr7:56013932-56014428		18.8339	0.0563978	19.3339	0.556398	5.11887	#N/A	1
ENSMUSG00000001655	ENSMUSG00000001655	Hoxc13	chr15:102921102-102928814	protein_coding	0.352927	0	0.852927	0.5	0.770494	#N/A	0
ENSMUSG00000001656	ENSMUSG00000001656	Hoxc11	chr15:102954426-102957708	protein_coding	0.335123	0	0.835123	0.5	0.740061	#N/A	0
ENSMUSG00000001657	ENSMUSG00000001657	Hoxc8	chr15:102990621-102994267	protein_coding	4.36531	0.683179	4.86531	1.18318	2.03986	Hoxc8	0
ENSMUSG00000084319	ENSMUSG00000084319	Tpt1-ps3	chr6:99877746-99878433		180.861	4.88636	181.361	5.38636	5.07341	#N/A	1
ENSMUSG00000001663	ENSMUSG00000001663	Gstt1	chr10:75783812-75798584	protein_coding	0.493081	0	0.993081	0.5	0.989983	Gstt1	0
ENSMUSG00000001665	ENSMUSG00000001665	Gstt3	chr10:75774114-75781414	protein_coding	0.885871	0.117031	1.38587	0.617031	1.16738	Gstt3	0
ENSMUSG00000067038	ENSMUSG00000067038	Rps12-ps3	chr19:59322289-59322783	protein_coding	17.392	0.0412078	17.892	0.541208	5.04699	#N/A	1
ENSMUSG00000001670	ENSMUSG00000001670	Tat	chr8:109990436-109999803	protein_coding	0	0	0.5	0.5	0	#N/A	0
ENSMUSG00000001672	ENSMUSG00000001672	Marveld3	chr8:109947913-109962203	protein_coding	0	0	0.5	0.5	0	#N/A	0
ENSMUSG00000001674	ENSMUSG00000001674	Ddx18	chr1:121553834-121567989	protein_coding	4.03649	1.88026	4.53649	2.38026	0.930457	Ddx18	0
ENSMUSG00000096449	ENSMUSG00000096449	Gm4076	chr13:85126998-85127514	protein_coding	59.2342	1.3072	59.7342	1.8072	5.04673	#N/A	1
ENSMUSG00000001700	ENSMUSG00000001700	Gramd3	chr18:56432131-56503792	protein_coding	2.81157	0	3.31157	0.5	2.72752	Gramd3	0
ENSMUSG00000001707	ENSMUSG00000001707	Eef1e1	chr13:38645697-38659028	protein_coding	2.47929	0.253232	2.97929	0.753232	1.9838	Eef1e1	0
ENSMUSG00000077317	ENSMUSG00000077317	Gm25785	chr18:51607543-51607668		15.94	0	16.44	0.5	5.03914	#N/A	1
ENSMUSG00000001739	ENSMUSG00000001739	Cldn15	chr5:136966615-136975858	protein_coding	2.75513	0.219764	3.25513	0.719764	2.17712	Cldn15	0
ENSMUSG00000001741	ENSMUSG00000001741	Il16	chr7:83642847-83745726	protein_coding	0.380562	0.762736	0.880562	1.26274	-0.520057	#N/A	0
ENSMUSG00000064440	ENSMUSG00000064440	Gm26224	chr1:161035393-161035473		15.9044	0	16.4044	0.5	5.03601	#N/A	1
ENSMUSG00000001751	ENSMUSG00000001751	Naglu	chr11:101070011-101077672	protein_coding	3.59296	0.279384	4.09296	0.779384	2.39274	Naglu	0
ENSMUSG00000022718	ENSMUSG00000022718	Dgcr8	chr16:18253947-18289249	protein_coding	18.0969	0.0688965	18.5969	0.568897	5.03075	Dgcr8	1
ENSMUSG00000076218	ENSMUSG00000076218	Mir692-1	chr17:6895228-6895337		15.6483	0	16.1483	0.5	5.01331	#N/A	1
ENSMUSG00000001763	ENSMUSG00000001763	Tspan33	chr6:29694221-29718559	protein_coding	0.231429	0.0549254	0.731429	0.554925	0.398424	Tspan33	0
ENSMUSG00000001767	ENSMUSG00000001767	Crnkl1	chr2:145917478-145935014	protein_coding	3.85748	0.836961	4.35748	1.33696	1.70454	Crnkl1	0
ENSMUSG00000040174	ENSMUSG00000040174	Alkbh3	chr2:93980549-94010807	protein_coding	15.6341	2.76176e-06	16.1341	0.500003	5.01203	Alkbh3	1
ENSMUSG00000001773	ENSMUSG00000001773	Folh1	chr7:86719351-86775864	protein_coding	2.19223	0.356154	2.69223	0.856154	1.65286	Folh1	0
ENSMUSG00000001774	ENSMUSG00000001774	Chordc1	chr9:18292266-18314000	protein_coding	2.35007	0.400263	2.85007	0.900263	1.66258	Chordc1	0
ENSMUSG00000064341	ENSMUSG00000064341	mt-Nd1	chrM:2750-3707	protein_coding	1383.64	42.4995	1384.14	42.9995	5.00853	#N/A	1
ENSMUSG00000001785	ENSMUSG00000001785	Pwp1	chr10:85871830-85889096	protein_coding	2.97366	2.36812	3.47366	2.86812	0.276351	Pwp1	0
ENSMUSG00000001786	ENSMUSG00000001786	Fbxo7	chr10:86021971-86051873	protein_coding	3.87272	0.332253	4.37272	0.832253	2.39344	Fbxo7	0
ENSMUSG00000091228	ENSMUSG00000091228	Gm20390	chr11:93949818-93968293	protein_coding	15.3815	0.000168153	15.8815	0.500168	4.98879	#N/A	1
ENSMUSG00000085587	ENSMUSG00000085587	Gm14493	chrX:10717472-10718710		56.9097	1.31299	57.4097	1.81299	4.98485	#N/A	1
ENSMUSG00000001804	ENSMUSG00000001804	Dsg4	chr18:20436174-20471821	protein_coding	0	0	0.5	0.5	0	#N/A	0
ENSMUSG00000001815	ENSMUSG00000001815	Evx2	chr2:74652996-74659861	protein_coding	0	0	0.5	0.5	0	#N/A	0
ENSMUSG00000001819	ENSMUSG00000001819	Hoxd13	chr2:74668309-74671599	protein_coding	0	0	0.5	0.5	0	#N/A	0
ENSMUSG00000001823	ENSMUSG00000001823	Hoxd12	chr2:74674928-74677706	protein_coding	0	0	0.5	0.5	0	#N/A	0
ENSMUSG00000001827	ENSMUSG00000001827	Folr1	chr7:101858330-101870788	protein_coding	0.379698	0	0.879698	0.5	0.81508	#N/A	0
ENSMUSG00000040564	ENSMUSG00000040564	Apoc1	chr7:19689483-19692658	protein_coding	32.0177	0.527612	32.5177	1.02761	4.98386	Apoc1	1
ENSMUSG00000001833	ENSMUSG00000001833	Sept7	chr9:25252438-25308571	protein_coding	3.58089	0.37672	4.08089	0.87672	2.2187	#N/A	0
ENSMUSG00000093208	ENSMUSG00000093208	Gm22415	chr12:8298277-8298339		1860.43	59.1091	1860.93	59.6091	4.96435	#N/A	1
ENSMUSG00000060126	ENSMUSG00000060126	Tpt1	chr14:75845092-75848525	protein_coding	809.029	25.5394	809.529	26.0394	4.95831	Tpt1	1
ENSMUSG00000033739	ENSMUSG00000033739	Fkbpl	chr17:34644763-34646324	protein_coding	16.9737	0.0665815	17.4737	0.566581	4.94676	Fkbpl	1
ENSMUSG00000001864	ENSMUSG00000001864	Aif1l	chr2:31950259-31973442	protein_coding	1.47263	0	1.97263	0.5	1.98012	Aif1l	0
ENSMUSG00000001865	ENSMUSG00000001865	Cpa3	chr3:20215616-20242181	protein_coding	0.480908	0	0.980908	0.5	0.97219	Cpa3	0
ENSMUSG00000001870	ENSMUSG00000001870	Ltbp1	chr17:75005567-75392512	protein_coding	1.20048	0.604305	1.70048	1.10431	0.622803	Ltbp1	0
ENSMUSG00000080414	ENSMUSG00000080414	Gm26470	chr19:6467531-6467597		14.867	0	15.367	0.5	4.94176	#N/A	1
ENSMUSG00000001901	ENSMUSG00000001901	Kcnh6	chr11:106008123-106034549	protein_coding	0.0223441	0	0.522344	0.5	0.0630724	#N/A	0
ENSMUSG00000031601	ENSMUSG00000031601	Cnot7	chr8:40492539-40515847	protein_coding	15.8541	0.032206	16.3541	0.532206	4.94152	Cnot7	1
ENSMUSG00000083219	ENSMUSG00000083219	Gm11410	chr4:80003988-80005131		15.8044	0.0375195	16.3044	0.53752	4.9228	#N/A	1
ENSMUSG00000092825	ENSMUSG00000092825	Gm23164	chr2:76479218-76479329		14.5267	0	15.0267	0.5	4.90946	#N/A	1
ENSMUSG00000031198	ENSMUSG00000031198	Fundc2	chrX:75382398-75396459	protein_coding	31.3429	0.561839	31.8429	1.06184	4.90633	Fundc2	1
ENSMUSG00000023939	ENSMUSG00000023939	Mrpl14	chr17:45686321-45698495	protein_coding	14.4344	0	14.9344	0.5	4.90057	Mrpl14	1
ENSMUSG00000001930	ENSMUSG00000001930	Vwf	chr6:125546773-125686679	protein_coding	0.161044	0.536831	0.661044	1.03683	-0.649363	#N/A	0
ENSMUSG00000001942	ENSMUSG00000001942	Siae	chr9:37613846-37648318	protein_coding	0.726753	0	1.22675	0.5	1.29484	Siae	0
ENSMUSG00000001943	ENSMUSG00000001943	Vsig2	chr9:37539254-37544205	protein_coding	0.0613089	0	0.561309	0.5	0.166867	#N/A	0
ENSMUSG00000001946	ENSMUSG00000001946	Esam	chr9:37528077-37538319	protein_coding	0.537941	0.419246	1.03794	0.919246	0.175202	Esam	0
ENSMUSG00000001948	ENSMUSG00000001948	Spa17	chr9:37603294-37613720	protein_coding	0.346258	0	0.846258	0.5	0.759169	Spa17	0
ENSMUSG00000001962	ENSMUSG00000001962	Fam50a	chrX:74313032-74320149	protein_coding	3.97061	1.33128	4.47061	1.83128	1.28762	Fam50a	0
ENSMUSG00000077993	ENSMUSG00000077993	Gm23938	chr19:34875403-34875487		14.3401	0	14.8401	0.5	4.89143	#N/A	1
ENSMUSG00000042148	ENSMUSG00000042148	Cox10	chr11:63962626-64079468	protein_coding	29.4739	0.512851	29.9739	1.01285	4.88721	Cox10	1
ENSMUSG00000001985	ENSMUSG00000001985	Grik3	chr4:125490699-125714173	protein_coding	0.0851458	0.14183	0.585146	0.64183	-0.133395	#N/A	0
ENSMUSG00000001986	ENSMUSG00000001986	Gria3	chrX:41400853-41678601	protein_coding	1.16923	0.353703	1.66923	0.853703	0.967377	Gria3	0
ENSMUSG00000001988	ENSMUSG00000001988	Npas1	chr7:16455720-16476780	protein_coding	0.0323074	0	0.532307	0.5	0.0903315	#N/A	0
ENSMUSG00000001995	ENSMUSG00000001995	Sipa1l2	chr8:125418062-125492710	protein_coding	0.525787	0.416008	1.02579	0.916008	0.163299	Sipa1l2	0
ENSMUSG00000001998	ENSMUSG00000001998	Ap4e1	chr2:127008716-127067909	protein_coding	2.1682	1.09174	2.6682	1.59174	0.745262	Ap4e1	0
ENSMUSG00000030218	ENSMUSG00000030218	Mgp	chr6:136872435-136875805	protein_coding	14.1324	0	14.6324	0.5	4.87109	Mgp	1
ENSMUSG00000002006	ENSMUSG00000002006	Pdzd4	chrX:73793358-73824969	protein_coding	0.0328815	0.0430927	0.532882	0.543093	-0.0273837	#N/A	0
ENSMUSG00000002007	ENSMUSG00000002007	Srpk3	chrX:73774404-73778925	protein_coding	0.239389	0.788869	0.739389	1.28887	-0.8017	#N/A	0
ENSMUSG00000082826	ENSMUSG00000082826	Gm6097	chr3:92024566-92024911		13.9935	0	14.4935	0.5	4.85733	#N/A	1
ENSMUSG00000002012	ENSMUSG00000002012	Pnck	chrX:73655993-73660117	protein_coding	0.0868821	0	0.586882	0.5	0.231143	#N/A	0
ENSMUSG00000037096	ENSMUSG00000037096	Gm9762	chr3:78966355-78966799		13.5718	0	14.0718	0.5	4.81473	#N/A	1
ENSMUSG00000078695	ENSMUSG00000078695	Cisd3	chr11:97685825-97688621	protein_coding	18.5883	0.186152	19.0883	0.686152	4.79802	Cisd3	1
ENSMUSG00000002017	ENSMUSG00000002017	Fam98a	chr17:75537085-75551946	protein_coding	3.05717	1.1391	3.55717	1.6391	1.11783	Fam98a	0
ENSMUSG00000002020	ENSMUSG00000002020	Ltbp2	chr12:84783211-84876532	protein_coding	1.92898	1.35148	2.42898	1.85148	0.391672	Ltbp2	0
ENSMUSG00000002028	ENSMUSG00000002028	Mll1	chr9:44803354-44881296	protein_coding	1.91031	0.338907	2.41031	0.838907	1.52264	#N/A	0
ENSMUSG00000064672	ENSMUSG00000064672	Gm22806	chr13:51648198-51648334		13.2486	0	13.7486	0.5	4.78121	#N/A	1
ENSMUSG00000002032	ENSMUSG00000002032	Tmem25	chr9:44793775-44799307	protein_coding	0	0	0.5	0.5	0	#N/A	0
ENSMUSG00000002033	ENSMUSG00000002033	Cd3g	chr9:44969571-44980431	protein_coding	0	0	0.5	0.5	0	#N/A	0
ENSMUSG00000092770	ENSMUSG00000092770	Mirlet7a-2	chr9:41536715-41536811		13.1946	0	13.6946	0.5	4.77554	#N/A	1
ENSMUSG00000009927	ENSMUSG00000009927	Rps25	chr9:44407713-44410405	protein_coding	32.1462	0.694928	32.6462	1.19493	4.77192	Rps25	1
ENSMUSG00000002055	ENSMUSG00000002055	Spag5	chr11:78301528-78322457	protein_coding	0.681239	0.368738	1.18124	0.868738	0.443308	Spag5	0
ENSMUSG00000002057	ENSMUSG00000002057	Foxn1	chr11:78357576-78386558	protein_coding	0	0	0.5	0.5	0	#N/A	0
ENSMUSG00000043004	ENSMUSG00000043004	Gng2	chr14:19872558-19977627	protein_coding	13.024	0	13.524	0.5	4.75745	Gng2	1
ENSMUSG00000043866	ENSMUSG00000043866	Taf10	chr7:105739392-105744361	protein_coding	33.0017	0.743384	33.5017	1.24338	4.75189	Taf10	1
ENSMUSG00000061390	ENSMUSG00000061390	Gm7866	chr9:72174578-72174959	protein_coding	85.3025	2.71447	85.8025	3.21447	4.73837	Gm7866	1
ENSMUSG00000096617	ENSMUSG00000096617	Gm5559	chr5:95861707-95862894		155.222	5.33521	155.722	5.83521	4.73804	#N/A	1
ENSMUSG00000002076	ENSMUSG00000002076	Hsf2bp	chr17:31944768-32034508	protein_coding	0.0693013	0.00137719	0.569301	0.501377	0.183296	#N/A	0
ENSMUSG00000070692	ENSMUSG00000070692	Rps12-ps10	chr2:122219992-122220391		14.1212	0.0564052	14.6212	0.556405	4.71578	#N/A	1
ENSMUSG00000002100	ENSMUSG00000002100	Mybpc3	chr2:91118143-91136516	protein_coding	0	0	0.5	0.5	0	#N/A	0
ENSMUSG00000080487	ENSMUSG00000080487	Gm23492	chr11:49895730-49895845		12.5862	0	13.0862	0.5	4.70997	#N/A	1
ENSMUSG00000059461	ENSMUSG00000059461	Gm7331	chrX:162566815-162567309		126.585	4.39074	127.085	4.89074	4.6996	#N/A	1
ENSMUSG00000002104	ENSMUSG00000002104	Rapsn	chr2:91035619-91045729	protein_coding	0.0480507	0	0.548051	0.5	0.132381	#N/A	0
ENSMUSG00000057530	ENSMUSG00000057530	Ece1	chr4:137862236-137965229	protein_coding	39.52	1.04563	40.02	1.54563	4.69445	Ece1	1
ENSMUSG00000025868	ENSMUSG00000025868	Higd2a	chr13:54590206-54591158	protein_coding	47.053	1.3376	47.553	1.8376	4.69364	Higd2a	1
ENSMUSG00000022681	ENSMUSG00000022681	Ntan1	chr16:13819250-13835451	protein_coding	12.4015	0	12.9015	0.5	4.68947	Ntan1	1
ENSMUSG00000002109	ENSMUSG00000002109	Ddb2	chr2:91211571-91236982	protein_coding	0.961926	0.31837	1.46193	0.81837	0.837045	Ddb2	0
ENSMUSG00000002111	ENSMUSG00000002111	Sfpi1	chr2:91082389-91115756	protein_coding	0.133127	0	0.633127	0.5	0.340567	Sfpi1	0
ENSMUSG00000081565	ENSMUSG00000081565	Rps12-ps5	chr7:30263262-30263651		13.9145	0.058681	14.4145	0.558681	4.68935	#N/A	1
ENSMUSG00000092949	ENSMUSG00000092949	Gm23394	chr12:55821062-55821153		12.226	0	12.726	0.5	4.66971	#N/A	1
ENSMUSG00000002190	ENSMUSG00000002190	Clgn	chr8:83389866-83428552	protein_coding	0	0	0.5	0.5	0	#N/A	0
ENSMUSG00000002204	ENSMUSG00000002204	Napsa	chr7:44572431-44586862	protein_coding	0.111708	0.214905	0.611708	0.714905	-0.224908	#N/A	0
ENSMUSG00000041845	ENSMUSG00000041845	Rhod	chr19:4425458-4439432	protein_coding	12.1732	0	12.6732	0.5	4.66371	Rhod	1
ENSMUSG00000002210	ENSMUSG00000002210	Smg9	chr7:24399618-24422778	protein_coding	3.52785	0.957505	4.02785	1.45751	1.46651	Smg9	0
ENSMUSG00000002221	ENSMUSG00000002221	Paxip1	chr5:27740666-27791339	protein_coding	1.70328	1.24255	2.20328	1.74255	0.338453	Paxip1	0
ENSMUSG00000025066	ENSMUSG00000025066	Sfr1	chr19:47731755-47735588	protein_coding	13.4417	0.0521072	13.9417	0.552107	4.65831	Sfr1	1
ENSMUSG00000071654	ENSMUSG00000071654	AI462493	chr19:8880015-8880933	protein_coding	12.0297	0	12.5297	0.5	4.64728	AI462493	1
ENSMUSG00000002228	ENSMUSG00000002228	Ppm1j	chr3:104781055-104786018	protein_coding	0.0797751	0	0.579775	0.5	0.213565	#N/A	0
ENSMUSG00000024661	ENSMUSG00000024661	Fth1	chr19:9982702-9985092	protein_coding	652.512	25.8973	653.012	26.3973	4.62865	Fth1	1
ENSMUSG00000002240	ENSMUSG00000002240	4930432K09Rik	chr5:87825685-87846386	protein_coding	0	0	0.5	0.5	0	#N/A	0
ENSMUSG00000002249	ENSMUSG00000002249	Tead3	chr17:28331670-28350805	protein_coding	3.78623	3.64689	4.28623	4.14689	0.0476795	Tead3	0
ENSMUSG00000087029	ENSMUSG00000087029	Gm14133	chr2:149743926-149798743		11.7868	0	12.2868	0.5	4.61904	#N/A	1
ENSMUSG00000002257	ENSMUSG00000002257	Def6	chr17:28207777-28228608	protein_coding	0.825725	0.351597	1.32573	0.851597	0.638539	Def6	0
ENSMUSG00000028797	ENSMUSG00000028797	Tmem234	chr4:129600667-129624059	protein_coding	26.3571	0.593571	26.8571	1.09357	4.61818	Tmem234	1
ENSMUSG00000002266	ENSMUSG00000002266	Zim1	chr7:6675442-6696450	protein_coding	0.277257	0.133344	0.777257	0.633344	0.295402	Zim1	0
ENSMUSG00000002274	ENSMUSG00000002274	Metrn	chr17:25794570-25797136	protein_coding	0.0746164	0	0.574616	0.5	0.200671	Metrn	0
ENSMUSG00000032336	ENSMUSG00000032336	Nptn	chr9:58582239-58657955	protein_coding	77.4554	2.68542	77.9554	3.18542	4.61309	Nptn	1
ENSMUSG00000095297	ENSMUSG00000095297	Gm25381	chr15:39308469-39308578		11.7362	0	12.2362	0.5	4.61308	#N/A	1
ENSMUSG00000096567	ENSMUSG00000096567	Gm24098	chr15:38238571-38238680		11.7362	0	12.2362	0.5	4.61308	#N/A	1
ENSMUSG00000002297	ENSMUSG00000002297	Dbf4	chr5:8396972-8422716	protein_coding	0.914356	0.0224692	1.41436	0.522469	1.43673	Dbf4	0
ENSMUSG00000077262	ENSMUSG00000077262	n-R5s165	chr6:112234162-112234262		11.7042	0	12.2042	0.5	4.60931	#N/A	1
ENSMUSG00000084284	ENSMUSG00000084284	Tpt1-ps6	chrX:101768534-101769057		123.211	4.57343	123.711	5.07343	4.60787	#N/A	1
ENSMUSG00000082423	ENSMUSG00000082423	Gm15148	chrX:151493113-151493269		11.6046	0	12.1046	0.5	4.59748	#N/A	1
ENSMUSG00000005054	ENSMUSG00000005054	Cstb	chr10:78425669-78427619	protein_coding	31.5207	0.822901	32.0207	1.3229	4.59723	Cstb	1
ENSMUSG00000002324	ENSMUSG00000002324	Rec8	chr14:55618036-55625395	protein_coding	0	0	0.5	0.5	0	#N/A	0
ENSMUSG00000088958	ENSMUSG00000088958	Scarna8	chr4:86586452-86586583		11.4317	0	11.9317	0.5	4.57673	#N/A	1
ENSMUSG00000002326	ENSMUSG00000002326	Gmpr2	chr14:55672234-55678750	protein_coding	2.51791	0.0535962	3.01791	0.553596	2.44664	Gmpr2	0
ENSMUSG00000064370	ENSMUSG00000064370	mt-Cytb	chrM:14144-15288	protein_coding	1118.41	46.6651	1118.91	47.1651	4.56823	#N/A	1
ENSMUSG00000055720	ENSMUSG00000055720	Ubl7	chr9:57910985-57929968	protein_coding	12.7868	0.0614547	13.2868	0.561455	4.56468	Ubl7	1
ENSMUSG00000002341	ENSMUSG00000002341	Ncan	chr8:70093084-70120873	protein_coding	0.144805	0.0313849	0.644805	0.531385	0.279106	#N/A	0
ENSMUSG00000036372	ENSMUSG00000036372	Tmem258	chr19:10204013-10207824	protein_coding	23.9768	0.537294	24.4768	1.03729	4.56052	Tmem258	1
ENSMUSG00000002343	ENSMUSG00000002343	Armc6	chr8:70220171-70234466	protein_coding	1.12816	0	1.62816	0.5	1.70324	Armc6	0
ENSMUSG00000096755	ENSMUSG00000096755	Gm20746	chr10:130592153-130592705		19.6788	0.355366	20.1788	0.855366	4.56015	#N/A	1
ENSMUSG00000064351	ENSMUSG00000064351	mt-Co1	chrM:5327-6872	protein_coding	3770.02	160.452	3770.52	160.952	4.55006	#N/A	1
ENSMUSG00000076460	ENSMUSG00000076460	Mir744	chr11:65734732-65734832		11.1469	0	11.6469	0.5	4.54187	#N/A	1
ENSMUSG00000034880	ENSMUSG00000034880	Mrpl34	chr8:71464925-71465752	protein_coding	52.7336	1.79413	53.2336	2.29413	4.53632	Mrpl34	1
ENSMUSG00000061848	ENSMUSG00000061848	Gm5805	chr15:81972389-81972845		24.9593	0.598735	25.4593	1.09874	4.53428	#N/A	1
ENSMUSG00000002384	ENSMUSG00000002384	Bmp8b	chr4:123105164-123132099	protein_coding	0.0394953	0.0241424	0.539495	0.524142	0.0416516	#N/A	0
ENSMUSG00000064068	ENSMUSG00000064068	Mtx1	chr3:89209080-89227088	protein_coding	25.8073	0.636794	26.3073	1.13679	4.53242	Mtx1	1
ENSMUSG00000037960	ENSMUSG00000037960	1110007C09Rik	chr13:49202950-49216026	protein_coding	11.0557	0	11.5557	0.5	4.53053	1110007C09Rik	1
ENSMUSG00000002396	ENSMUSG00000002396	Ocel1	chr8:71371297-71379361	protein_coding	1.39428	0.740969	1.89428	1.24097	0.610183	Ocel1	0
ENSMUSG00000091313	ENSMUSG00000091313	Fth-ps2	chr6:39653449-39653965		13.3573	0.100554	13.8573	0.600554	4.52821	#N/A	1
ENSMUSG00000002413	ENSMUSG00000002413	Braf	chr6:39603236-39725463	protein_coding	3.41049	0.426716	3.91049	0.926716	2.07715	Braf	0
ENSMUSG00000090389	ENSMUSG00000090389	Gm7236	chr14:43121771-43122101		11.0172	0	11.5172	0.5	4.52572	#N/A	1
ENSMUSG00000002428	ENSMUSG00000002428	Hltf	chr3:20057810-20118490	protein_coding	1.22373	0.170214	1.72373	0.670214	1.36284	Hltf	0
ENSMUSG00000092840	ENSMUSG00000092840	Gm24331	chr13:84182277-84182344		11.0077	0	11.5077	0.5	4.52453	#N/A	1
ENSMUSG00000032399	ENSMUSG00000032399	Rpl4	chr9:64173386-64178562	protein_coding	86.5774	3.28538	87.0774	3.78538	4.52379	Rpl4	1
ENSMUSG00000002459	ENSMUSG00000002459	Rgs20	chr1:4909575-5070285	protein_coding	0.687036	0.31848	1.18704	0.81848	0.536345	#N/A	0
ENSMUSG00000002475	ENSMUSG00000002475	Abhd3	chr18:10644410-10706771	protein_coding	3.28784	0	3.78784	0.5	2.92138	Abhd3	0
ENSMUSG00000002477	ENSMUSG00000002477	Snrpd1	chr18:10617795-10628230	protein_coding	1.90616	0.973217	2.40616	1.47322	0.707763	Snrpd1	0
ENSMUSG00000002486	ENSMUSG00000002486	Tchp	chr5:114707759-114722327	protein_coding	1.07081	2.56226	1.57081	3.06226	-0.963088	Tchp	0
ENSMUSG00000002489	ENSMUSG00000002489	Tiam1	chr16:89787110-89980080	protein_coding	1.29904	0	1.79904	0.5	1.84723	#N/A	0
ENSMUSG00000064857	ENSMUSG00000064857	n-R5s25	chr18:34647399-34647518		10.9983	0	11.4983	0.5	4.52335	#N/A	1
ENSMUSG00000002500	ENSMUSG00000002500	Rpl3l	chr17:24727819-24736143	protein_coding	0	0	0.5	0.5	0	#N/A	0
ENSMUSG00000002504	ENSMUSG00000002504	Slc9a3r2	chr17:24639281-24650305	protein_coding	3.88766	0.922742	4.38766	1.42274	1.62478	Slc9a3r2	0
ENSMUSG00000028936	ENSMUSG00000028936	Rpl22	chr4:152325741-152334071	protein_coding	118.122	4.67697	118.622	5.17697	4.51812	Rpl22	1
ENSMUSG00000063739	ENSMUSG00000063739	Gm4963	chr5:137993046-137993424		10.949	0	11.449	0.5	4.51715	Gm4963	1
ENSMUSG00000081400	ENSMUSG00000081400	Gm13680	chr2:83353156-83353949		17.4624	0.288644	17.9624	0.788644	4.50946	#N/A	1
ENSMUSG00000002565	ENSMUSG00000002565	Scin	chr12:40059768-40134228	protein_coding	0.0187939	0.0511265	0.518794	0.551126	-0.087222	Scin	0
ENSMUSG00000002578	ENSMUSG00000002578	Ikzf4	chr10:128630842-128645991	protein_coding	0.276711	0.0914634	0.776711	0.591463	0.393089	#N/A	0
ENSMUSG00000022484	ENSMUSG00000022484	Hoxc10	chr15:102966795-102971893	protein_coding	10.8356	3.10974e-10	11.3356	0.5	4.50279	#N/A	1
ENSMUSG00000002588	ENSMUSG00000002588	Pon1	chr6:5168089-5193946	protein_coding	0	0	0.5	0.5	0	#N/A	0
ENSMUSG00000080473	ENSMUSG00000080473	Gm25315	chr5:135207987-135208108		10.8099	0.000181809	11.3099	0.500182	4.49899	#N/A	1
ENSMUSG00000097148	ENSMUSG00000097148	GAPDH	chr14:11280734-11356726	protein_coding	28.7412	0.797021	29.2412	1.29702	4.49473	Gapdh	1
ENSMUSG00000097854	ENSMUSG00000097854	PPP4R2	chr10:79910855-79911140	protein_coding	10.5852	0	11.0852	0.5	4.47056	Ppp4r2	1
ENSMUSG00000002617	ENSMUSG00000002617	Zfp40	chr17:23173868-23193252	protein_coding	0.0242172	0	0.524217	0.5	0.0682366	Zfp40	0
ENSMUSG00000022747	ENSMUSG00000022747	St3gal6	chr16:58468124-58524243	protein_coding	17.5911	0.320161	18.0911	0.820161	4.46323	St3gal6	1
ENSMUSG00000002633	ENSMUSG00000002633	Shh	chr5:28456814-28467101	protein_coding	0	0	0.5	0.5	0	#N/A	0
ENSMUSG00000002635	ENSMUSG00000002635	Pdcd2l	chr7:34184498-34196661	protein_coding	4.37913	0	4.87913	0.5	3.28662	Pdcd2l	0
ENSMUSG00000092215	ENSMUSG00000092215	Gm20419	chr17:35480138-35480728		22.9373	0.56271	23.4373	1.06271	4.46299	#N/A	1
ENSMUSG00000096438	ENSMUSG00000096438	Gm20899	chrY:38619732-38620964		27.1355	0.765008	27.6355	1.26501	4.4493	#N/A	1
ENSMUSG00000002661	ENSMUSG00000002661	Alkbh7	chr17:56997338-56999322	protein_coding	2.89119	0	3.39119	0.5	2.76179	Alkbh7	0
ENSMUSG00000002664	ENSMUSG00000002664	Pspn	chr17:56999456-57000018	protein_coding	0	2.26527	0.5	2.76527	-2.46742	#N/A	0
ENSMUSG00000002668	ENSMUSG00000002668	Dennd1c	chr17:57066055-57078510	protein_coding	0	0	0.5	0.5	0	#N/A	0
ENSMUSG00000064945	ENSMUSG00000064945	Rny3	chr6:47781623-47781725		73054.7	3373.38	73055.2	3373.88	4.43651	#N/A	1
ENSMUSG00000002688	ENSMUSG00000002688	Prkd1	chr12:50341230-50649223	protein_coding	2.49255	0.185764	2.99255	0.685764	2.12559	Prkd1	0
ENSMUSG00000002699	ENSMUSG00000002699	Lcp2	chr11:34046919-34092295	protein_coding	0.22552	0.222075	0.72552	0.722075	0.00686669	#N/A	0
ENSMUSG00000094171	ENSMUSG00000094171	Gm24426	chr16:25855436-25855507		10.2298	0	10.7298	0.5	4.42355	#N/A	1
ENSMUSG00000094783	ENSMUSG00000094783	Gm24660	chr11:75696390-75696461		10.2298	0	10.7298	0.5	4.42355	#N/A	1
ENSMUSG00000002731	ENSMUSG00000002731	Prkra	chr2:76629897-76648015	protein_coding	3.72281	0.0510089	4.22281	0.551009	2.93806	Prkra	0
ENSMUSG00000096570	ENSMUSG00000096570	Gm22399	chr6:67247918-67247989		10.2298	0	10.7298	0.5	4.42355	#N/A	1
ENSMUSG00000096616	ENSMUSG00000096616	Gm23360	chr10:8778559-8778630		10.2298	0	10.7298	0.5	4.42355	#N/A	1
ENSMUSG00000096637	ENSMUSG00000096637	Gm22172	chr9:37453721-37453792		10.2298	0	10.7298	0.5	4.42355	#N/A	1
ENSMUSG00000048316	ENSMUSG00000048316	Gm9823	chr2:29738334-29738665		10.222	0	10.722	0.5	4.4225	#N/A	1
ENSMUSG00000030629	ENSMUSG00000030629	Zfand6	chr7:84615053-84679361	protein_coding	13.7549	0.165028	14.2549	0.665028	4.4219	Zfand6	1
ENSMUSG00000082097	ENSMUSG00000082097	Gm14039	chr2:129362758-129362859		10.1939	0	10.6939	0.5	4.41872	#N/A	1
ENSMUSG00000036835	ENSMUSG00000036835	Psenen	chr7:30561867-30563184	protein_coding	22.9024	0.594488	23.4024	1.09449	4.41833	Psenen	1
ENSMUSG00000002769	ENSMUSG00000002769	Gnmt	chr17:46725663-46729168	protein_coding	0.494188	0.105397	0.994188	0.605397	0.715637	Gnmt	0
ENSMUSG00000002771	ENSMUSG00000002771	Grin2d	chr7:45831882-45870928	protein_coding	0.202258	0	0.702258	0.5	0.490073	#N/A	0
ENSMUSG00000042737	ENSMUSG00000042737	Dpm3	chr3:89259357-89267079	protein_coding	10.1535	0	10.6535	0.5	4.41326	Dpm3	1
ENSMUSG00000070178	ENSMUSG00000070178	n-R5s71	chr11:74319791-74319910		10.0817	0	10.5817	0.5	4.4035	#N/A	1
ENSMUSG00000002791	ENSMUSG00000002791	Pdxk-ps	chr17:32076082-32100286		0.00579892	0.013269	0.505799	0.513269	-0.0211512	#N/A	0
ENSMUSG00000002797	ENSMUSG00000002797	Ggct	chr6:54982579-54992950	protein_coding	0.563285	0.0786248	1.06329	0.578625	0.877828	Ggct	0
ENSMUSG00000002799	ENSMUSG00000002799	Jag2	chr12:112908589-112929495	protein_coding	0.176963	0.0383675	0.676963	0.538367	0.330486	#N/A	0
ENSMUSG00000002803	ENSMUSG00000002803	Btbd6	chr12:112976481-112978930	protein_coding	2.58316	1.48966	3.08316	1.98966	0.631888	Btbd6	0
ENSMUSG00000002804	ENSMUSG00000002804	Nudt14	chr12:112934732-112942118	protein_coding	1.6477	0.346372	2.1477	0.846372	1.34343	Nudt14	0
ENSMUSG00000002808	ENSMUSG00000002808	Epdr1	chr13:19591708-19619830	protein_coding	1.03809	0.936627	1.53809	1.43663	0.0984544	Epdr1	0
ENSMUSG00000002660	ENSMUSG00000002660	Clpp	chr17:56990263-56996371	protein_coding	15.918	0.282098	16.418	0.782098	4.39179	Clpp	1
ENSMUSG00000002814	ENSMUSG00000002814	Top3a	chr11:60740057-60777365	protein_coding	0.896847	0.417053	1.39685	0.917053	0.607097	Top3a	0
ENSMUSG00000051811	ENSMUSG00000051811	Cox6b2	chr7:4751791-4753094	protein_coding	14.1093	0.199508	14.6093	0.699508	4.3844	Cox6b2	1
ENSMUSG00000002825	ENSMUSG00000002825	Qtrt1	chr9:21411836-21420277	protein_coding	1.92724	0.574261	2.42724	1.07426	1.17597	Qtrt1	0
ENSMUSG00000090458	ENSMUSG00000090458	Gm17122	chr5:113842600-113843116		9.91743	0	10.4174	0.5	4.38093	#N/A	1
ENSMUSG00000086922	ENSMUSG00000086922	Gm13835	chr6:31141978-31142663		9.90207	0	10.4021	0.5	4.3788	#N/A	1
ENSMUSG00000002835	ENSMUSG00000002835	Chaf1a	chr17:56040415-56068026	protein_coding	1.16387	0.10312	1.66387	0.60312	1.46403	Chaf1a	0
ENSMUSG00000094603	ENSMUSG00000094603	Gm25872	chr17:7704839-7704939		9.84641	0	10.3464	0.5	4.37106	#N/A	1
ENSMUSG00000040385	ENSMUSG00000040385	Ppp1ca	chr19:4192157-4195419	protein_coding	167.605	7.77073	168.105	8.27073	4.3452	Ppp1ca	1
ENSMUSG00000078965	ENSMUSG00000078965	Gm12033	chr11:20334833-20336086		78.2709	3.3798	78.7709	3.8798	4.34361	#N/A	1
ENSMUSG00000091537	ENSMUSG00000091537	Tma7	chr9:109077987-109082381	protein_coding	38.4163	1.41803	38.9163	1.91803	4.34268	Tma7	1
ENSMUSG00000002870	ENSMUSG00000002870	Mcm2	chr6:88883474-88898780	protein_coding	1.4234	0.441754	1.9234	0.941754	1.03024	Mcm2	0
ENSMUSG00000002871	ENSMUSG00000002871	Tpra1	chr6:88902250-88912238	protein_coding	3.9941	1.51306	4.4941	2.01306	1.15864	Tpra1	0
ENSMUSG00000029048	ENSMUSG00000029048	Rer1	chr4:155074109-155086382	protein_coding	22.0131	0.619689	22.5131	1.11969	4.32959	Rer1	1
ENSMUSG00000081251	ENSMUSG00000081251	Gm12164	chr11:45829318-45829869		10.7554	0.0630519	11.2554	0.563052	4.32121	#N/A	1
ENSMUSG00000002897	ENSMUSG00000002897	Il17ra	chr6:120463196-120483727	protein_coding	3.70945	0.556963	4.20945	1.05696	1.99371	Il17ra	0
ENSMUSG00000083773	ENSMUSG00000083773	Gm13394	chr2:28933474-28934652		68.7522	2.97835	69.2522	3.47835	4.31538	#N/A	1
ENSMUSG00000002908	ENSMUSG00000002908	Kcnn1	chr8:70842048-70857008	protein_coding	0.504187	0.025006	1.00419	0.525006	0.935622	Kcnn1	0
ENSMUSG00000002910	ENSMUSG00000002910	Arrdc2	chr8:70835154-70839720	protein_coding	0.51819	1.16699	1.01819	1.66699	-0.711239	Arrdc2	0
ENSMUSG00000002930	ENSMUSG00000002930	Ppp1r17	chr6:56017514-56032688	protein_coding	0.0297005	0.016465	0.529701	0.516465	0.0365063	#N/A	0
ENSMUSG00000018326	ENSMUSG00000018326	Ywhab	chr2:163994959-164018588	protein_coding	105.732	4.838	106.232	5.338	4.31478	Ywhab	1
ENSMUSG00000072704	ENSMUSG00000072704	2700089E24Rik	chr6:133105238-133107747	protein_coding	15.719	0.317118	16.219	0.817118	4.311	2700089E24Rik	1
ENSMUSG00000051579	ENSMUSG00000051579	Tceal8	chrX:136168983-136172342	protein_coding	10.7608	0.0686341	11.2608	0.568634	4.30766	Tceal8	1
ENSMUSG00000083341	ENSMUSG00000083341	Gm14238	chr2:155486046-155486369		10.9538	0.0828645	11.4538	0.582865	4.29652	#N/A	1
ENSMUSG00000002963	ENSMUSG00000002963	Pnkp	chr7:44857138-44862925	protein_coding	3.35078	2.68344	3.85078	3.18344	0.274564	Pnkp	0
ENSMUSG00000067161	ENSMUSG00000067161	Gm5560	chr5:97264827-97265719		80.9884	3.65035	81.4884	4.15035	4.29529	#N/A	1
ENSMUSG00000002980	ENSMUSG00000002980	Bcam	chr7:19756130-19771016	protein_coding	0.137642	0	0.637642	0.5	0.350819	Bcam	0
ENSMUSG00000020676	ENSMUSG00000020676	Ccl11	chr11:82057822-82062955	protein_coding	9.25438	0	9.75438	0.5	4.28605	Ccl11	1
ENSMUSG00000002983	ENSMUSG00000002983	Relb	chr7:19606216-19629438	protein_coding	2.84455	2.22127	3.34455	2.72127	0.297532	Relb	0
ENSMUSG00000016477	ENSMUSG00000016477	E2f3	chr13:29906574-29985668	protein_coding	10.2042	0.0493707	10.7042	0.549371	4.28425	E2f3	1
ENSMUSG00000036305	ENSMUSG00000036305	Rpl39-ps	chr15:102634981-102635336		58.6665	2.53882	59.1665	3.03882	4.2832	#N/A	1
ENSMUSG00000002992	ENSMUSG00000002992	Apoc2	chr7:19671578-19681423	protein_coding	0.887994	0	1.38799	0.5	1.473	Apoc2	0
ENSMUSG00000026822	ENSMUSG00000026822	Lcn2	chr2:32384632-32387797	protein_coding	30.0238	1.06927	30.5238	1.56927	4.28177	Lcn2	1
ENSMUSG00000015672	ENSMUSG00000015672	Mrpl32	chr13:14610300-14613037	protein_coding	9.22382	0	9.72382	0.5	4.28152	Mrpl32	1
ENSMUSG00000003031	ENSMUSG00000003031	Cdkn1b	chr6:134920400-134925513	protein_coding	2.32339	0.600243	2.82339	1.10024	1.35961	Cdkn1b	0
ENSMUSG00000003032	ENSMUSG00000003032	Klf4	chr4:55527142-55532466	protein_coding	4.33886	0.33797	4.83886	0.83797	2.5297	Klf4	0
ENSMUSG00000093674	ENSMUSG00000093674	Rpl41	chr10:128548113-128549305	protein_coding	474.388	24.1148	474.888	24.6148	4.26999	Rpl41	1
ENSMUSG00000084595	ENSMUSG00000084595	n-R5s188	chr4:82439409-82439514		9.13094	0	9.63094	0.5	4.26768	#N/A	1
ENSMUSG00000084601	ENSMUSG00000084601	Gm23111	chr17:33959662-33959767		9.13094	0	9.63094	0.5	4.26768	#N/A	1
ENSMUSG00000078162	ENSMUSG00000078162	Gm2574	chr3:142962560-142963792		39.1098	1.55832	39.6098	2.05832	4.26632	#N/A	1
ENSMUSG00000003051	ENSMUSG00000003051	Elf3	chr1:135253573-135258472	protein_coding	0	0	0.5	0.5	0	Elf3	0
ENSMUSG00000003053	ENSMUSG00000003053	Cyp2c29	chr19:39269404-39330713	protein_coding	0	0.139294	0.5	0.639294	-0.354551	#N/A	0
ENSMUSG00000003062	ENSMUSG00000003062	Stard3nl	chr13:19357676-19395752	protein_coding	2.26428	0	2.76428	0.5	2.4669	Stard3nl	0
ENSMUSG00000040212	ENSMUSG00000040212	Emp3	chr7:45918022-45921426	protein_coding	9.11792	0	9.61792	0.5	4.26572	Emp3	1
ENSMUSG00000003070	ENSMUSG00000003070	Efna2	chr10:80179481-80190010	protein_coding	1.07106	0	1.57106	0.5	1.65174	Efna2	0
ENSMUSG00000058546	ENSMUSG00000058546	Rpl23a	chr11:78180931-78183584	protein_coding	155.68	7.62302	156.18	8.12302	4.26505	Rpl23a	1
ENSMUSG00000024678	ENSMUSG00000024678	Ms4a4d	chr19:11536800-11558467	protein_coding	10.0932	0.05477	10.5932	0.55477	4.2551	Ms4a4d	1
ENSMUSG00000003119	ENSMUSG00000003119	Cdk12	chr11:98203058-98278504	protein_coding	3.2939	1.24993	3.7939	1.74993	1.11638	Cdk12	0
ENSMUSG00000039887	ENSMUSG00000039887	Alg14	chr3:121291816-121362011	protein_coding	9.03309	0	9.53309	0.5	4.25294	Alg14	1
ENSMUSG00000047260	ENSMUSG00000047260	Emc6	chr11:73175518-73177037	protein_coding	66.8675	3.03952	67.3675	3.53952	4.25043	Emc6	1
ENSMUSG00000003134	ENSMUSG00000003134	Tbc1d8	chr1:39371498-39478747	protein_coding	0.556917	0.0699066	1.05692	0.569907	0.891065	Tbc1d8	0
ENSMUSG00000003135	ENSMUSG00000003135	Cnot11	chr1:39534991-39546881	protein_coding	2.64697	0.173963	3.14697	0.673963	2.22322	Cnot11	0
ENSMUSG00000035885	ENSMUSG00000035885	Cox8a	chr19:7215157-7217616	protein_coding	802.332	41.8072	802.832	42.3072	4.24612	Cox8a	1
ENSMUSG00000062997	ENSMUSG00000062997	Rpl35	chr2:39001579-39005624	protein_coding	83.0314	3.91287	83.5314	4.41287	4.24253	Rpl35	1
ENSMUSG00000064345	ENSMUSG00000064345	mt-Nd2	chrM:3913-4951	protein_coding	167.706	8.42637	168.206	8.92637	4.23601	#N/A	1
ENSMUSG00000028868	ENSMUSG00000028868	Wasf2	chr4:133130504-133199756	protein_coding	43.7631	1.85554	44.2631	2.35554	4.23197	Wasf2	1
ENSMUSG00000096163	ENSMUSG00000096163	Gm24142	chr12:13490508-13490615		8.86729	0	9.36729	0.5	4.22763	#N/A	1
ENSMUSG00000031447	ENSMUSG00000031447	Lamp1	chr8:13159134-13175338	protein_coding	107.36	5.25785	107.86	5.75785	4.22749	Lamp1	1
ENSMUSG00000003190	ENSMUSG00000003190	Bcl2l12	chr7:44991221-44998712	protein_coding	0.202695	0	0.702695	0.5	0.490971	Bcl2l12	0
ENSMUSG00000003198	ENSMUSG00000003198	Zfp959	chr17:55892183-55898584	protein_coding	0.319081	0	0.819081	0.5	0.712078	Zfp959	0
ENSMUSG00000078677	ENSMUSG00000078677	Gm10974	chr7:66365904-66386309	protein_coding	8.83677	0	9.33677	0.5	4.22292	#N/A	1
ENSMUSG00000096255	ENSMUSG00000096255	Dynlt1b	chr17:6430111-6436293	protein_coding	20.1434	0.60639	20.6434	1.10639	4.22175	Dynlt1b	1
ENSMUSG00000003206	ENSMUSG00000003206	Ebi3	chr17:55952622-55957021	protein_coding	0.122618	0	0.622618	0.5	0.316419	#N/A	0
ENSMUSG00000003208	ENSMUSG00000003208	Ccdc94	chr17:55959186-55967949	protein_coding	1.67094	0.0642439	2.17094	0.564244	1.94393	Ccdc94	0
ENSMUSG00000090860	ENSMUSG00000090860	Gm17134	chr10:79863936-79864434		8.79857	0	9.29857	0.5	4.21701	#N/A	1
ENSMUSG00000003227	ENSMUSG00000003227	Edar	chr10:58600788-58675654	protein_coding	0	0	0.5	0.5	0	#N/A	0
ENSMUSG00000003228	ENSMUSG00000003228	Grk5	chr19:60889748-61092553	protein_coding	4.36215	0.521378	4.86215	1.02138	2.25108	Grk5	0
ENSMUSG00000091271	ENSMUSG00000091271	Gm17104	chr7:30564736-30565356		8.74635	0	9.24635	0.5	4.20888	#N/A	1
ENSMUSG00000039476	ENSMUSG00000039476	Prrx2	chr2:30834971-30881241	protein_coding	8.68094	0	9.18094	0.5	4.19864	Prrx2	1
ENSMUSG00000083563	ENSMUSG00000083563	Gm13340	chr2:22588102-22589647		654.425	35.216	654.925	35.716	4.19669	#N/A	1
ENSMUSG00000058542	ENSMUSG00000058542	Gm15590	chr17:6131853-6132405		56.5229	2.619	57.0229	3.119	4.19239	#N/A	1
ENSMUSG00000003271	ENSMUSG00000003271	Sult2b1	chr7:45729982-45759612	protein_coding	1.07935	0	1.57935	0.5	1.65933	#N/A	0
ENSMUSG00000003273	ENSMUSG00000003273	Car11	chr7:45699842-45704682	protein_coding	0.89508	0	1.39508	0.5	1.48035	Car11	0
ENSMUSG00000003279	ENSMUSG00000003279	Dlgap1	chr17:69969072-70821413	protein_coding	0.853937	0.835097	1.35394	1.3351	0.020216	Dlgap1	0
ENSMUSG00000003282	ENSMUSG00000003282	Plag1	chr4:3900995-3938423	protein_coding	0.355759	0.243015	0.855759	0.743015	0.203813	Plag1	0
ENSMUSG00000003283	ENSMUSG00000003283	Hck	chr2:153108467-153151441	protein_coding	0	0	0.5	0.5	0	#N/A	0
ENSMUSG00000020225	ENSMUSG00000020225	Tmbim4	chr10:120201589-120224917	protein_coding	31.4571	1.25393	31.9571	1.75393	4.18747	Tmbim4	1
ENSMUSG00000092358	ENSMUSG00000092358	Gm20430	chr14:57698012-57698219		15.1044	0.368515	15.6044	0.868515	4.16726	#N/A	1
ENSMUSG00000003309	ENSMUSG00000003309	Ap1m2	chr9:21295456-21312333	protein_coding	0	0	0.5	0.5	0	#N/A	0
ENSMUSG00000052429	ENSMUSG00000052429	Prmt1	chr7:44975988-44986492	protein_coding	9.56967	0.0613453	10.0697	0.561345	4.16498	Prmt1	1
ENSMUSG00000003341	ENSMUSG00000003341	Atp8b3	chr10:80519584-80539124	protein_coding	0	0	0.5	0.5	0	#N/A	0
ENSMUSG00000075893	ENSMUSG00000075893	Gm25538	chr12:12700038-12700145		8.44504	0	8.94504	0.5	4.16109	#N/A	1
ENSMUSG00000095087	ENSMUSG00000095087	Gm25328	chr14:20701522-20701629		8.44504	0	8.94504	0.5	4.16109	#N/A	1
ENSMUSG00000000339	ENSMUSG00000000339	Rtca	chr3:116488962-116508208	protein_coding	10.2618	0.103424	10.7618	0.603424	4.1566	Rtca	1
ENSMUSG00000031918	ENSMUSG00000031918	Mtmr2	chr9:13748409-13806481	protein_coding	13.7513	0.302216	14.2513	0.802216	4.15096	Mtmr2	1
ENSMUSG00000003352	ENSMUSG00000003352	Cacnb3	chr15:98632219-98644530	protein_coding	1.51851	0	2.01851	0.5	2.01329	Cacnb3	0
ENSMUSG00000003354	ENSMUSG00000003354	Ccdc65	chr15:98708206-98723326	protein_coding	0.0360267	0	0.536027	0.5	0.100377	#N/A	0
ENSMUSG00000003355	ENSMUSG00000003355	Fkbp11	chr15:98724372-98728198	protein_coding	1.17877	0.893451	1.67877	1.39345	0.268742	Fkbp11	0
ENSMUSG00000035199	ENSMUSG00000035199	Arl6ip5	chr6:97210688-97233315	protein_coding	15.4592	0.404348	15.9592	0.904348	4.14137	Arl6ip5	1
ENSMUSG00000032403	ENSMUSG00000032403	2300009A05Rik	chr9:63394446-63399244	protein_coding	8.31318	0	8.81318	0.5	4.13966	2300009A05Rik	1
ENSMUSG00000003378	ENSMUSG00000003378	Grik5	chr7:25009852-25072369	protein_coding	0.579274	0.629803	1.07927	1.1298	-0.0660101	Grik5	0
ENSMUSG00000003379	ENSMUSG00000003379	Cd79a	chr7:24897380-24902197	protein_coding	0	0	0.5	0.5	0	#N/A	0
ENSMUSG00000022841	ENSMUSG00000022841	Ap2m1	chr16:20535477-20544909	protein_coding	66.1125	3.28957	66.6125	3.78957	4.13569	Ap2m1	1
ENSMUSG00000007050	ENSMUSG00000007050	Lsm2	chr17:34981861-34985891	protein_coding	8.26222	0	8.76222	0.5	4.1313	Lsm2	1
ENSMUSG00000064617	ENSMUSG00000064617	n-R5s176	chr5:120064334-120064443		8.21535	0	8.71535	0.5	4.12356	#N/A	1
ENSMUSG00000003410	ENSMUSG00000003410	Elavl3	chr9:22015004-22052023	protein_coding	0.0439471	0.0425952	0.543947	0.542595	0.00359007	#N/A	0
ENSMUSG00000003411	ENSMUSG00000003411	Rab3b	chr4:108879062-108943324	protein_coding	0.214522	0	0.714522	0.5	0.51505	#N/A	0
ENSMUSG00000003418	ENSMUSG00000003418	St8sia6	chr2:13651019-13793808	protein_coding	0.00871343	0	0.508713	0.5	0.0249251	#N/A	0
ENSMUSG00000064704	ENSMUSG00000064704	n-R5s180	chr5:149281117-149281223		8.19503	0	8.69503	0.5	4.12019	#N/A	1
ENSMUSG00000036002	ENSMUSG00000036002	Fam214b	chr4:43032413-43046220	protein_coding	13.6176	0.313475	14.1176	0.813475	4.11725	Fam214b	1
ENSMUSG00000037278	ENSMUSG00000037278	Tmem97	chr11:78541816-78550777	protein_coding	8.17583	0	8.67583	0.5	4.117	Tmem97	1
ENSMUSG00000080893	ENSMUSG00000080893	Gm15920	chr5:130188394-130188796		35.6897	1.59009	36.1897	2.09009	4.11394	#N/A	1
ENSMUSG00000007656	ENSMUSG00000007656	Arpp19	chr9:75037613-75060313	protein_coding	18.2143	0.581155	18.7143	1.08115	4.1135	Arpp19	1
ENSMUSG00000003436	ENSMUSG00000003436	Dll3	chr7:28293552-28302238	protein_coding	0	0	0.5	0.5	0	#N/A	0
ENSMUSG00000027509	ENSMUSG00000027509	Rae1	chr2:173000116-173015739	protein_coding	8.13363	0	8.63363	0.5	4.10997	Rae1	1
ENSMUSG00000088437	ENSMUSG00000088437	Gm24198	chr11:54458161-54458269		8.12666	0	8.62666	0.5	4.1088	#N/A	1
ENSMUSG00000003444	ENSMUSG00000003444	Med29	chr7:28386145-28392708	protein_coding	3.98329	0.263751	4.48329	0.763751	2.55338	Med29	0
ENSMUSG00000003452	ENSMUSG00000003452	Bicd1	chr6:149408983-149563329	protein_coding	0.481256	0.0408279	0.981256	0.540828	0.85946	#N/A	0
ENSMUSG00000091644	ENSMUSG00000091644	Gm17590	chr5:3473070-3473178	protein_coding	8.12666	0	8.62666	0.5	4.1088	#N/A	1
ENSMUSG00000019809	ENSMUSG00000019809	Pex3	chr10:13523841-13553142	protein_coding	14.2533	0.355609	14.7533	0.855609	4.10794	Pex3	1
ENSMUSG00000003469	ENSMUSG00000003469	Phyhip	chr14:70457475-70468832	protein_coding	0.0700473	0	0.570047	0.5	0.189154	#N/A	0
ENSMUSG00000003476	ENSMUSG00000003476	Crhr2	chr6:55090048-55133016	protein_coding	0	0	0.5	0.5	0	#N/A	0
ENSMUSG00000003477	ENSMUSG00000003477	Inmt	chr6:55170625-55175043	protein_coding	0.337101	0	0.837101	0.5	0.743474	#N/A	0
ENSMUSG00000003484	ENSMUSG00000003484	Cyp4f18	chr8:71988481-72009626	protein_coding	0.292354	0	0.792354	0.5	0.664217	#N/A	0
ENSMUSG00000081643	ENSMUSG00000081643	Gm11605	chr1:63364719-63365365		10.6197	0.149213	11.1197	0.649213	4.09828	#N/A	1
ENSMUSG00000003505	ENSMUSG00000003505	Psg18	chr7:18345421-18355009	protein_coding	0	0	0.5	0.5	0	#N/A	0
ENSMUSG00000040824	ENSMUSG00000040824	Snrpd2	chr7:19149721-19152735	protein_coding	21.7278	0.798426	22.2278	1.29843	4.09753	Snrpd2	1
ENSMUSG00000032381	ENSMUSG00000032381	Fam96a	chr9:66126610-66138955	protein_coding	17.3901	0.547221	17.8901	1.04722	4.09452	Fam96a	1
ENSMUSG00000003527	ENSMUSG00000003527	Dgcr14	chr16:17900710-17911348	protein_coding	2.35149	0.476644	2.85149	0.976644	1.54581	Dgcr14	0
ENSMUSG00000063714	ENSMUSG00000063714	1700011J10Rik	chr2:72979423-72988677		8.01204	0	8.51204	0.5	4.0895	#N/A	1
ENSMUSG00000027860	ENSMUSG00000027860	Vangl1	chr3:102156700-102204693	protein_coding	10.5851	0.155394	11.0851	0.655394	4.08012	Vangl1	1
ENSMUSG00000003534	ENSMUSG00000003534	Ddr1	chr17:35681566-35704621	protein_coding	3.84757	0.288887	4.34757	0.788887	2.46232	Ddr1	0
ENSMUSG00000003541	ENSMUSG00000003541	Ier3	chr17:35821683-35822923	protein_coding	3.82389	0	4.32389	0.5	3.11233	Ier3	0
ENSMUSG00000003545	ENSMUSG00000003545	Fosb	chr7:19302720-19310045	protein_coding	0.0348779	0.166359	0.534878	0.666359	-0.31709	#N/A	0
ENSMUSG00000070319	ENSMUSG00000070319	Eif3g	chr9:20894351-20898600	protein_coding	35.1338	1.6103	35.6338	2.1103	4.07773	Eif3g	1
ENSMUSG00000078967	ENSMUSG00000078967	Gm3272	chr8:92715746-92716975		30.0334	1.31414	30.5334	1.81414	4.07303	#N/A	1
ENSMUSG00000003555	ENSMUSG00000003555	Cyp17a1	chr19:46667164-46672974	protein_coding	0.0376437	0	0.537644	0.5	0.104722	#N/A	0
ENSMUSG00000003559	ENSMUSG00000003559	As3mt	chr19:46707442-46741095	protein_coding	1.87886	0	2.37886	0.5	2.25027	As3mt	0
ENSMUSG00000027374	ENSMUSG00000027374	Mrps5	chr2:127587221-127606829	protein_coding	30.2207	1.32551	30.7207	1.82551	4.07284	Mrps5	1
ENSMUSG00000003575	ENSMUSG00000003575	Crtc1	chr8:70382354-70439579	protein_coding	2.58357	0.758389	3.08357	1.25839	1.29302	Crtc1	0
ENSMUSG00000003581	ENSMUSG00000003581	Rnf215	chr11:4135201-4141172	protein_coding	2.01048	0.923494	2.51048	1.42349	0.818527	Rnf215	0
ENSMUSG00000003585	ENSMUSG00000003585	Sec14l2	chr11:4097038-4123415	protein_coding	0	0	0.5	0.5	0	#N/A	0
ENSMUSG00000003604	ENSMUSG00000003604	Aven	chr2:112492963-112634573	protein_coding	1.84548	0.168437	2.34548	0.668437	1.81102	Aven	0
ENSMUSG00000026817	ENSMUSG00000026817	Ak1	chr2:32621757-32646805	protein_coding	35.7125	1.65964	36.2125	2.15964	4.06763	Ak1	1
ENSMUSG00000079641	ENSMUSG00000079641	Rpl39	chrX:37082519-37085402	protein_coding	61.9767	3.23251	62.4767	3.73251	4.0651	Rpl39	1
ENSMUSG00000003644	ENSMUSG00000003644	Rps6ka1	chr4:133847289-133887797	protein_coding	4.27544	0.791683	4.77544	1.29168	1.88638	Rps6ka1	0
ENSMUSG00000003657	ENSMUSG00000003657	Calb2	chr8:110142538-110168206	protein_coding	0	0	0.5	0.5	0	#N/A	0
ENSMUSG00000058603	ENSMUSG00000058603	Rpl28-ps1	chr1:128038526-128039022		55.2281	2.83657	55.7281	3.33657	4.06197	#N/A	1
ENSMUSG00000064367	ENSMUSG00000064367	mt-Nd5	chrM:11741-13565	protein_coding	551.253	32.5618	551.753	33.0618	4.06079	#N/A	1
ENSMUSG00000003665	ENSMUSG00000003665	Has1	chr17:17843327-17855188	protein_coding	0.0969721	0.500981	0.596972	1.00098	-0.745679	#N/A	0
ENSMUSG00000003680	ENSMUSG00000003680	Taf6l	chr19:8774353-8786417	protein_coding	2.59184	1.75247	3.09184	2.25247	0.456958	Taf6l	0
ENSMUSG00000076119	ENSMUSG00000076119	Mir698	chr4:124743780-124743889		7.82414	0	8.32414	0.5	4.0573	#N/A	1
ENSMUSG00000076136	ENSMUSG00000076136	Gm24951	chr19:7959529-7959638		7.82414	0	8.32414	0.5	4.0573	#N/A	1
ENSMUSG00000038754	ENSMUSG00000038754	Elovl3	chr19:46131896-46135694	protein_coding	105.417	5.87136	105.917	6.37136	4.05519	Elovl3	1
ENSMUSG00000003752	ENSMUSG00000003752	Itpkc	chr7:27207171-27228628	protein_coding	1.13535	0.700976	1.63535	1.20098	0.445392	Itpkc	0
ENSMUSG00000055401	ENSMUSG00000055401	Fbxo6	chr4:148145715-148152140	protein_coding	14.7554	0.418008	15.2554	0.918008	4.05467	Fbxo6	1
ENSMUSG00000003778	ENSMUSG00000003778	Brd8	chr18:34598614-34624601	protein_coding	4.21929	1.65234	4.71929	2.15234	1.13266	Brd8	0
ENSMUSG00000003779	ENSMUSG00000003779	Kif20a	chr18:34624623-34633265	protein_coding	0.367637	0	0.867637	0.5	0.795163	Kif20a	0
ENSMUSG00000050052	ENSMUSG00000050052	2610019F03Rik	chr8:13952008-13975032	protein_coding	9.98363	0.134863	10.4836	0.634863	4.04555	2610019F03Rik	1
ENSMUSG00000095326	ENSMUSG00000095326	Gm21742	chrY:90843933-90844074	protein_coding	7.74454	0	8.24454	0.5	4.04344	#N/A	1
ENSMUSG00000051256	ENSMUSG00000051256	Jagn1	chr6:113442568-113448229	protein_coding	19.4005	0.709246	19.9005	1.20925	4.04063	Jagn1	1
ENSMUSG00000090516	ENSMUSG00000090516	Rps11-ps1	chr9:59471758-59472233		7.72676	0	8.22676	0.5	4.04032	#N/A	1
ENSMUSG00000028799	ENSMUSG00000028799	Zfp362	chr4:128773087-128806045	protein_coding	7.72108	0	8.22108	0.5	4.03933	Zfp362	1
ENSMUSG00000078180	ENSMUSG00000078180	Gm20900	chr13:120304193-120304655		28.6292	1.27624	29.1292	1.77624	4.03557	#N/A	1
ENSMUSG00000003824	ENSMUSG00000003824	Syce2	chr8:84872110-84888221	protein_coding	0.639797	0.194514	1.1398	0.694514	0.714701	Syce2	0
ENSMUSG00000003847	ENSMUSG00000003847	Nfat5	chr8:107293469-107379517	protein_coding	3.21165	1.54361	3.71165	2.04361	0.860941	Nfat5	0
ENSMUSG00000027540	ENSMUSG00000027540	Ptpn1	chr2:167932056-167979385	protein_coding	18.0865	0.636093	18.5865	1.13609	4.0321	Ptpn1	1
ENSMUSG00000003849	ENSMUSG00000003849	Nqo1	chr8:107388224-107403206	protein_coding	0.580366	0.212864	1.08037	0.712864	0.599821	Nqo1	0
ENSMUSG00000003863	ENSMUSG00000003863	Ppfia3	chr7:45339125-45367019	protein_coding	0.0670064	0	0.567006	0.5	0.181437	#N/A	0
ENSMUSG00000081800	ENSMUSG00000081800	Gm14200	chr2:158468168-158468360		7.65658	0	8.15658	0.5	4.02796	#N/A	1
ENSMUSG00000061461	ENSMUSG00000061461	Smim20	chr5:53267105-53283510	protein_coding	11.0768	0.210994	11.5768	0.710994	4.02526	Smim20	1
ENSMUSG00000003872	ENSMUSG00000003872	Lin7b	chr7:45367890-45370583	protein_coding	0	0	0.5	0.5	0	Lin7b	0
ENSMUSG00000042616	ENSMUSG00000042616	Oscp1	chr4:126058564-126092195	protein_coding	20.168	0.774186	20.668	1.27419	4.01975	Oscp1	1
ENSMUSG00000003882	ENSMUSG00000003882	Il7r	chr15:9506160-9529876	protein_coding	0.0331709	0.029783	0.533171	0.529783	0.00919649	#N/A	0
ENSMUSG00000063328	ENSMUSG00000063328	Gm9396	chr3:130068411-130068978	protein_coding	13.0307	0.334993	13.5307	0.834993	4.01833	#N/A	1
ENSMUSG00000003929	ENSMUSG00000003929	Zfp81	chr17:33329341-33358878	protein_coding	0.0484236	0	0.548424	0.5	0.133363	Zfp81	0
ENSMUSG00000003934	ENSMUSG00000003934	Efnb3	chr11:69554091-69560205	protein_coding	0.103492	0	0.603492	0.5	0.271407	#N/A	0
ENSMUSG00000079225	ENSMUSG00000079225	Gm9531	chr9:81677611-81678494		7.55118	0	8.05118	0.5	4.0092	#N/A	1
ENSMUSG00000003949	ENSMUSG00000003949	Hlf	chr11:90336535-90390895	protein_coding	0.130495	0	0.630495	0.5	0.334557	#N/A	0
ENSMUSG00000065185	ENSMUSG00000065185	Gm25137	chr4:116674152-116674262		7.53716	0	8.03716	0.5	4.00669	#N/A	1
ENSMUSG00000084607	ENSMUSG00000084607	Gm22208	chr15:34531713-34531823		7.53716	0	8.03716	0.5	4.00669	#N/A	1
ENSMUSG00000003974	ENSMUSG00000003974	Grm3	chr5:9485235-9725352	protein_coding	0	0	0.5	0.5	0	#N/A	0
ENSMUSG00000003992	ENSMUSG00000003992	Ssbp2	chr13:91460282-91703429	protein_coding	3.34511	2.17982	3.84511	2.67982	0.520889	Ssbp2	0
ENSMUSG00000004018	ENSMUSG00000004018	Fancl	chr11:26386134-26471876	protein_coding	1.68257	0.359379	2.18257	0.859379	1.34466	Fancl	0
ENSMUSG00000004031	ENSMUSG00000004031	Fam5b	chr1:158245270-158356260	protein_coding	0	0	0.5	0.5	0	#N/A	0
ENSMUSG00000092074	ENSMUSG00000092074	Dynlt1a	chr17:6310546-6317474	protein_coding	15.0862	0.474018	15.5862	0.974018	4.00018	Dynlt1a	1
ENSMUSG00000004035	ENSMUSG00000004035	Gstm7	chr3:107926333-107931817	protein_coding	2.10551	1.28083	2.60551	1.78083	0.549016	Gstm7	0
ENSMUSG00000004038	ENSMUSG00000004038	Gstm3	chr3:107942332-107969283	protein_coding	1.08008	0	1.58008	0.5	1.66	Gstm3	0
ENSMUSG00000079677	ENSMUSG00000079677	Fdx1l	chr9:21067519-21073514	protein_coding	7.49319	0	7.99319	0.5	3.99877	Fdx1l	1
ENSMUSG00000024360	ENSMUSG00000024360	Etf1	chr18:34902784-34932007	protein_coding	26.9843	1.22034	27.4843	1.72034	3.99784	Etf1	1
ENSMUSG00000057359	ENSMUSG00000057359	Gm17494	chr3:122257090-122293547		20.0983	0.790556	20.5983	1.29056	3.99646	#N/A	1
ENSMUSG00000004054	ENSMUSG00000004054	Map3k11	chr19:5689130-5702862	protein_coding	2.16727	0.861446	2.66727	1.36145	0.970224	Map3k11	0
ENSMUSG00000075312	ENSMUSG00000075312	Gm13597	chr2:68554500-68555750		12.4681	0.315082	12.9681	0.815082	3.99188	#N/A	1
ENSMUSG00000014767	ENSMUSG00000014767	Tbp	chr17:15499887-15528379	protein_coding	8.5604	0.0711642	9.0604	0.571164	3.9876	Tbp	1
ENSMUSG00000029513	ENSMUSG00000029513	Prkab1	chr5:116013585-116024508	protein_coding	7.43049	0	7.93049	0.5	3.98741	Prkab1	1
ENSMUSG00000028608	ENSMUSG00000028608	0610037L13Rik	chr4:107889812-107899384	protein_coding	7.82608	0.0262891	8.32608	0.526289	3.98371	0610037L13Rik	1
ENSMUSG00000004085	ENSMUSG00000004085	B230120H23Rik	chr2:72285636-72442610	protein_coding	4.46008	0.0764397	4.96008	0.57644	3.10512	B230120H23Rik	0
ENSMUSG00000077672	ENSMUSG00000077672	Gm24472	chr3:87066892-87067024		7.405	0	7.905	0.5	3.98277	#N/A	1
ENSMUSG00000030720	ENSMUSG00000030720	Cln3	chr7:126571206-126585817	protein_coding	8.4611	0.0668944	8.9611	0.566894	3.98252	Cln3	1
ENSMUSG00000004099	ENSMUSG00000004099	Dnmt1	chr9:20907205-20959888	protein_coding	1.01106	0.264379	1.51106	0.764379	0.983201	Dnmt1	0
ENSMUSG00000062742	ENSMUSG00000062742	Gm5239	chr18:35536582-35536951	protein_coding	76.8566	4.40578	77.3566	4.90578	3.97897	#N/A	1
ENSMUSG00000035772	ENSMUSG00000035772	Mrps2	chr2:28468065-28471178	protein_coding	20.8987	0.85739	21.3987	1.35739	3.97862	Mrps2	1
ENSMUSG00000004110	ENSMUSG00000004110	Cacna1e	chr1:154392518-154725920	protein_coding	0	0	0.5	0.5	0	#N/A	0
ENSMUSG00000004113	ENSMUSG00000004113	Cacna1b	chr2:24603886-24763152	protein_coding	0.106101	0.0150358	0.606101	0.515036	0.234886	#N/A	0
ENSMUSG00000004127	ENSMUSG00000004127	Trmt10a	chr3:138143447-138159821	protein_coding	0.273115	0.0202718	0.773115	0.520272	0.571418	Trmt10a	0
ENSMUSG00000004151	ENSMUSG00000004151	Etv1	chr12:38779379-38868215	protein_coding	0.583426	0	1.08343	0.5	1.1156	#N/A	0
ENSMUSG00000004187	ENSMUSG00000004187	Kifc2	chr15:76660640-76668196	protein_coding	0.230719	0.275105	0.730719	0.775105	-0.085075	Kifc2	0
ENSMUSG00000024208	ENSMUSG00000024208	Mnf1	chr17:27122662-27133916	protein_coding	36.5343	1.85315	37.0343	2.35315	3.9762	Mnf1	1
ENSMUSG00000050043	ENSMUSG00000050043	Tmx2	chr2:84671315-84679140	protein_coding	40.7677	2.12235	41.2677	2.62235	3.97608	Tmx2	1
ENSMUSG00000004231	ENSMUSG00000004231	Pax2	chr19:44756048-44838268	protein_coding	0	0	0.5	0.5	0	#N/A	0
ENSMUSG00000004233	ENSMUSG00000004233	Wars2	chr3:99141067-99239186	protein_coding	1.54826	0.0319857	2.04826	0.531986	1.94494	Wars2	0
ENSMUSG00000019494	ENSMUSG00000019494	Cops6	chr5:138161070-138164646	protein_coding	61.9998	3.47572	62.4998	3.97572	3.97456	Cops6	1
ENSMUSG00000078193	ENSMUSG00000078193	Gm2000	chr1:156366039-156366484	protein_coding	51.6057	2.8209	52.1057	3.3209	3.9718	#N/A	1
ENSMUSG00000004266	ENSMUSG00000004266	Ptpn6	chr6:124720706-124738714	protein_coding	0.472305	0	0.972305	0.5	0.959481	#N/A	0
ENSMUSG00000004267	ENSMUSG00000004267	Eno2	chr6:124760052-124769673	protein_coding	0.302604	0.609071	0.802604	1.10907	-0.466591	Eno2	0
ENSMUSG00000045104	ENSMUSG00000045104	Gm5514	chr19:21938078-21938384		7.32793	0	7.82793	0.5	3.96863	#N/A	1
ENSMUSG00000035642	ENSMUSG00000035642	Aamdc	chr7:97550330-97579497	protein_coding	7.32194	0	7.82194	0.5	3.96753	Aamdc	1
ENSMUSG00000077938	ENSMUSG00000077938	Gm24132	chr8:96656128-96656219		7.31966	0	7.81966	0.5	3.96711	#N/A	1
ENSMUSG00000004296	ENSMUSG00000004296	Il12b	chr11:44400062-44414033	protein_coding	0	0	0.5	0.5	0	#N/A	0
ENSMUSG00000078578	ENSMUSG00000078578	Ube2d3	chr3:135438296-135467178	protein_coding	34.2328	1.72204	34.7328	2.22204	3.96634	Ube2d3	1
ENSMUSG00000004319	ENSMUSG00000004319	Clcn3	chr8:60910388-60983300	protein_coding	2.05356	1.22425	2.55356	1.72425	0.566541	Clcn3	0
ENSMUSG00000004328	ENSMUSG00000004328	Hif3a	chr7:17031506-17062427	protein_coding	0.67041	0.579933	1.17041	1.07993	0.116072	Hif3a	0
ENSMUSG00000004341	ENSMUSG00000004341	Gpx6	chr13:21312216-21319624	protein_coding	0	0	0.5	0.5	0	#N/A	0
ENSMUSG00000004344	ENSMUSG00000004344	Gpx5	chr13:21286428-21292731	protein_coding	0	0	0.5	0.5	0	#N/A	0
ENSMUSG00000004347	ENSMUSG00000004347	Pde1c	chr6:56069820-56369634	protein_coding	0	0	0.5	0.5	0	#N/A	0
ENSMUSG00000004356	ENSMUSG00000004356	Utp20	chr10:88746606-88826814	protein_coding	1.01374	0.112262	1.51374	0.612262	1.3059	Utp20	0
ENSMUSG00000004359	ENSMUSG00000004359	Spic	chr10:88674771-88685015	protein_coding	0.120071	0.575927	0.620071	1.07593	-0.795075	#N/A	0
ENSMUSG00000004360	ENSMUSG00000004360	9330159F19Rik	chr10:29211642-29230779	protein_coding	0.175084	0.253907	0.675084	0.753907	-0.15932	9330159F19Rik	0
ENSMUSG00000048755	ENSMUSG00000048755	Mcat	chr15:83546796-83555711	protein_coding	7.30087	0	7.80087	0.5	3.96364	Mcat	1
ENSMUSG00000004366	ENSMUSG00000004366	Sst	chr16:23889580-23890844	protein_coding	0	0	0.5	0.5	0	#N/A	0
ENSMUSG00000004371	ENSMUSG00000004371	Il11	chr7:4773054-4782857	protein_coding	0.0741215	0.442461	0.574121	0.942461	-0.715077	#N/A	0
ENSMUSG00000004383	ENSMUSG00000004383	Large	chr8:72814598-73353540	protein_coding	2.70707	0.332086	3.20707	0.832086	1.94645	Large	0
ENSMUSG00000070509	ENSMUSG00000070509	Rgma	chr7:73375519-73419899	protein_coding	7.65881	0.0232354	8.15881	0.523235	3.96283	Rgma	1
ENSMUSG00000004897	ENSMUSG00000004897	Hdgf	chr3:87906320-87916132	protein_coding	58.8886	3.31876	59.3886	3.81876	3.95901	Hdgf	1
ENSMUSG00000004415	ENSMUSG00000004415	Col26a1	chr5:136741758-136883209	protein_coding	0.743129	0.45509	1.24313	0.95509	0.380267	#N/A	0
ENSMUSG00000025103	ENSMUSG00000025103	Btbd1	chr7:81792074-81829431	protein_coding	9.31643	0.131307	9.81643	0.631307	3.95878	Btbd1	1
ENSMUSG00000080811	ENSMUSG00000080811	Gm14513	chrX:11684001-11684124		7.26355	0	7.76355	0.5	3.95672	#N/A	1
ENSMUSG00000019433	ENSMUSG00000019433	Gipc1	chr8:83652677-83664788	protein_coding	9.62142	0.152923	10.1214	0.652923	3.95436	Gipc1	1
ENSMUSG00000051695	ENSMUSG00000051695	Pcbp1	chr6:86524498-86526171	protein_coding	63.4375	3.62908	63.9375	4.12908	3.95277	Pcbp1	1
ENSMUSG00000004462	ENSMUSG00000004462	Tbccd1	chr16:22813214-22857569	protein_coding	1.27871	0.938237	1.77871	1.43824	0.30653	Tbccd1	0
ENSMUSG00000004473	ENSMUSG00000004473	Clec11a	chr7:44303769-44306959	protein_coding	0.313121	0	0.813121	0.5	0.701542	Clec11a	0
ENSMUSG00000004500	ENSMUSG00000004500	Zfp324	chr7:12965837-12974236	protein_coding	0.798138	0.269927	1.29814	0.769927	0.75365	Zfp324	0
ENSMUSG00000004508	ENSMUSG00000004508	Gab2	chr7:97081750-97308940	protein_coding	1.35412	0.627996	1.85412	1.128	0.716973	Gab2	0
ENSMUSG00000096544	ENSMUSG00000096544	Gm4617	chr3:124385509-124385998		11.9928	0.307057	12.4928	0.807057	3.95228	#N/A	1
ENSMUSG00000057375	ENSMUSG00000057375	Yipf1	chr4:107314362-107359823	protein_coding	7.22494	0	7.72494	0.5	3.94952	Yipf1	1
ENSMUSG00000004540	ENSMUSG00000004540	Psg17	chr7:18813936-18821607	protein_coding	0	0	0.5	0.5	0	#N/A	0
ENSMUSG00000004542	ENSMUSG00000004542	Psg19	chr7:18789566-18798520	protein_coding	0.0539705	0.0579037	0.553971	0.557904	-0.010207	#N/A	0
ENSMUSG00000004552	ENSMUSG00000004552	Ctse	chr1:131638305-131675503	protein_coding	0	0	0.5	0.5	0	#N/A	0
ENSMUSG00000025190	ENSMUSG00000025190	Got1	chr19:43499751-43524605	protein_coding	16.4955	0.6009	16.9955	1.1009	3.9484	Got1	1
ENSMUSG00000004561	ENSMUSG00000004561	Mettl17	chr14:51884841-51893039	protein_coding	3.49326	1.13006	3.99326	1.63006	1.29264	Mettl17	0
ENSMUSG00000069439	ENSMUSG00000069439	Gm8444	chr15:81843342-81843699	protein_coding	7.21853	0	7.71853	0.5	3.94833	#N/A	1
ENSMUSG00000004565	ENSMUSG00000004565	Pnpla6	chr8:3515383-3544266	protein_coding	1.45057	1.31043	1.95057	1.81043	0.107563	Pnpla6	0
ENSMUSG00000082100	ENSMUSG00000082100	Glns-ps1	chr11:19720354-19721472		48.7595	2.69372	49.2595	3.19372	3.94709	#N/A	1
ENSMUSG00000082099	ENSMUSG00000082099	Gm12013	chr11:17095489-17095644		57.3243	3.25086	57.8243	3.75086	3.94638	#N/A	1
ENSMUSG00000004591	ENSMUSG00000004591	Pkn2	chr3:142790901-142882004	protein_coding	3.83317	2.82748	4.33317	3.32748	0.380993	Pkn2	0
ENSMUSG00000004609	ENSMUSG00000004609	Cd33	chr7:43527455-43533171	protein_coding	0.101297	0.108232	0.601297	0.608232	-0.016544	#N/A	0
ENSMUSG00000092675	ENSMUSG00000092675	Gm25262	chr4:43631424-43631557		7.19758	0	7.69758	0.5	3.9444	#N/A	1
ENSMUSG00000004612	ENSMUSG00000004612	Nkg7	chr7:43437072-43438246	protein_coding	0	0	0.5	0.5	0	#N/A	0
ENSMUSG00000004613	ENSMUSG00000004613	Lim2	chr7:43430087-43435991	protein_coding	0	0	0.5	0.5	0	#N/A	0
ENSMUSG00000060538	ENSMUSG00000060538	Tmem219	chr7:126886170-126922917	protein_coding	7.33839	0.0117617	7.83839	0.511762	3.93701	Tmem219	1
ENSMUSG00000004630	ENSMUSG00000004630	Pcp2	chr8:3623370-3625545	protein_coding	0.19993	0.0737976	0.69993	0.573798	0.286669	Pcp2	0
ENSMUSG00000018102	ENSMUSG00000018102	Hist1h2bc	chr13:23684198-23692488	protein_coding	47.5784	2.66242	48.0784	3.16242	3.92629	Hist1h2bc	1
ENSMUSG00000004633	ENSMUSG00000004633	Chn2	chr6:54039553-54301810	protein_coding	0.214733	0	0.714733	0.5	0.515476	#N/A	0
ENSMUSG00000004637	ENSMUSG00000004637	Wwox	chr8:114439654-115352708	protein_coding	4.22762	1.88745	4.72762	2.38745	0.985644	Wwox	0
ENSMUSG00000004642	ENSMUSG00000004642	Slbp	chr5:33634951-33652574	protein_coding	4.13601	2.67575	4.63601	3.17575	0.545786	Slbp	0
ENSMUSG00000004651	ENSMUSG00000004651	Tyr	chr7:87427404-87493411	protein_coding	0.0482258	0.293084	0.548226	0.793084	-0.532703	#N/A	0
ENSMUSG00000004654	ENSMUSG00000004654	Ghrhr	chr6:55376294-55388530	protein_coding	0	0	0.5	0.5	0	#N/A	0
ENSMUSG00000004655	ENSMUSG00000004655	Aqp1	chr6:55336431-55348555	protein_coding	1.01333	0	1.51333	0.5	1.59773	Aqp1	0
ENSMUSG00000004661	ENSMUSG00000004661	Arid3b	chr9:57790352-57836793	protein_coding	0.489537	0	0.989537	0.5	0.984826	#N/A	0
ENSMUSG00000004665	ENSMUSG00000004665	Cnn2	chr10:79988583-79996062	protein_coding	3.05024	0	3.55024	0.5	2.82792	Cnn2	0
ENSMUSG00000037805	ENSMUSG00000037805	Rpl10a	chr17:28328470-28331032	protein_coding	61.552	3.58752	62.052	4.08752	3.92418	Rpl10a	1
ENSMUSG00000004668	ENSMUSG00000004668	Abca13	chr11:9191941-9684259	protein_coding	0	0	0.5	0.5	0	#N/A	0
ENSMUSG00000004677	ENSMUSG00000004677	Myo9b	chr8:71272713-71360712	protein_coding	2.19084	1.39481	2.69084	1.89481	0.506003	Myo9b	0
ENSMUSG00000004698	ENSMUSG00000004698	Hdac9	chr12:34371502-34528889	protein_coding	0.0294074	0	0.529407	0.5	0.0824503	#N/A	0
ENSMUSG00000004707	ENSMUSG00000004707	Ly9	chr1:171588623-171607410	protein_coding	0.0759034	0	0.575903	0.5	0.203899	#N/A	0
ENSMUSG00000004709	ENSMUSG00000004709	Cd244	chr1:171559192-171585318	protein_coding	0	0	0.5	0.5	0	#N/A	0
ENSMUSG00000004730	ENSMUSG00000004730	Emr1	chr17:57358685-57483529	protein_coding	0.770817	0.0755009	1.27082	0.575501	1.14287	Emr1	0
ENSMUSG00000004748	ENSMUSG00000004748	Mtfp1	chr11:4091479-4095445	protein_coding	4.41858	1.47941	4.91858	1.97941	1.31317	Mtfp1	0
ENSMUSG00000004768	ENSMUSG00000004768	Rab23	chr1:33719881-33742564	protein_coding	1.40488	0.316378	1.90488	0.816378	1.22239	Rab23	0
ENSMUSG00000091460	ENSMUSG00000091460	Gm7808	chr9:19927895-19928282	protein_coding	228.169	14.5702	228.669	15.0702	3.92349	#N/A	1
ENSMUSG00000060143	ENSMUSG00000060143	Gm10076	chr14:105681827-105682211	protein_coding	163.046	10.3098	163.546	10.8098	3.91928	#N/A	1
ENSMUSG00000073198	ENSMUSG00000073198	Gm10480	chr12:18216554-18217757		18.2947	0.743303	18.7947	1.2433	3.91808	Gm10480	1
ENSMUSG00000004791	ENSMUSG00000004791	Pgf	chr12:85166638-85177296	protein_coding	0.306202	0	0.806202	0.5	0.689213	Pgf	0
ENSMUSG00000004798	ENSMUSG00000004798	Ulk2	chr11:61775648-61855073	protein_coding	4.30324	0.374146	4.80324	0.874146	2.45806	Ulk2	0
ENSMUSG00000004814	ENSMUSG00000004814	Ccl24	chr5:135569936-135573043	protein_coding	0	0	0.5	0.5	0	#N/A	0
ENSMUSG00000004815	ENSMUSG00000004815	Dgkq	chr5:108646692-108669672	protein_coding	3.19676	3.93052	3.69676	4.43052	-0.261215	Dgkq	0
ENSMUSG00000004821	ENSMUSG00000004821	Tmed11	chr5:108777234-108795363	protein_coding	0	0	0.5	0.5	0	#N/A	0
ENSMUSG00000004837	ENSMUSG00000004837	Grap	chr11:61653264-61672784	protein_coding	0.138356	0.426381	0.638356	0.926381	-0.537244	#N/A	0
ENSMUSG00000004842	ENSMUSG00000004842	Pou1f1	chr16:65520511-65535005	protein_coding	0.52783	0.141722	1.02783	0.641722	0.679581	#N/A	0
ENSMUSG00000004843	ENSMUSG00000004843	Chmp2b	chr16:65539132-65562697	protein_coding	2.59928	0	3.09928	0.5	2.63193	Chmp2b	0
ENSMUSG00000022951	ENSMUSG00000022951	Rcan1	chr16:92391952-92466146	protein_coding	7.05622	0	7.55622	0.5	3.91766	Rcan1	1
ENSMUSG00000069516	ENSMUSG00000069516	Lyz2	chr10:117277333-117282274	protein_coding	11.0725	0.267275	11.5725	0.767275	3.91481	Lyz2	1
ENSMUSG00000004864	ENSMUSG00000004864	Mapk13	chr17:28769306-28778698	protein_coding	0.348685	0	0.848685	0.5	0.763301	#N/A	0
ENSMUSG00000059439	ENSMUSG00000059439	Bcas3	chr11:85353166-85826058	protein_coding	17.7472	0.710268	18.2472	1.21027	3.91428	Bcas3	1
ENSMUSG00000004872	ENSMUSG00000004872	Pax3	chr1:78101266-78197134	protein_coding	0.232257	0.266616	0.732257	0.766616	-0.066154	#N/A	0
ENSMUSG00000004880	ENSMUSG00000004880	Lbr	chr1:181815315-181842401	protein_coding	1.60625	0.638444	2.10625	1.13844	0.887613	Lbr	0
ENSMUSG00000004885	ENSMUSG00000004885	Crabp2	chr3:87948665-87953376	protein_coding	0	0	0.5	0.5	0	Crabp2	0
ENSMUSG00000004891	ENSMUSG00000004891	Nes	chr3:87971077-87980451	protein_coding	0.161649	0	0.661649	0.5	0.404138	Nes	0
ENSMUSG00000004892	ENSMUSG00000004892	Bcan	chr3:87987530-88000356	protein_coding	0	0	0.5	0.5	0	#N/A	0
ENSMUSG00000004894	ENSMUSG00000004894	Hapln2	chr3:88021749-88027583	protein_coding	0	0	0.5	0.5	0	#N/A	0
ENSMUSG00000031375	ENSMUSG00000031375	Bgn	chrX:73483601-73495933	protein_coding	220.855	14.1937	221.355	14.6937	3.91309	Bgn	1
ENSMUSG00000004896	ENSMUSG00000004896	Rrnad1	chr3:87922600-87930717	protein_coding	2.93224	0.480609	3.43224	0.980609	1.8074	Rrnad1	0
ENSMUSG00000043858	ENSMUSG00000043858	Nup62	chr7:44816087-44830809	protein_coding	9.4613	0.162222	9.9613	0.662222	3.91095	Nup62	1
ENSMUSG00000004902	ENSMUSG00000004902	Slc25a18	chr6:120773767-120793982	protein_coding	0	0	0.5	0.5	0	#N/A	0
ENSMUSG00000083373	ENSMUSG00000083373	Gm13392	chr2:23908440-23908590		7.01208	0	7.51208	0.5	3.90921	#N/A	1
ENSMUSG00000065721	ENSMUSG00000065721	Gm26168	chr6:122623546-122623658		7.00207	0	7.50207	0.5	3.90729	#N/A	1
ENSMUSG00000004933	ENSMUSG00000004933	Matk	chr10:81252934-81263365	protein_coding	0.0878529	0.620512	0.587853	1.12051	-0.930631	#N/A	0
ENSMUSG00000068240	ENSMUSG00000068240	Gm11808	chr4:3973106-3973581	protein_coding	278.945	18.1542	279.445	18.6542	3.90499	#N/A	1
ENSMUSG00000072674	ENSMUSG00000072674	Plac9b	chr14:26167787-26182273	protein_coding	9.42163	0.162768	9.92163	0.662768	3.904	#N/A	1
ENSMUSG00000050708	ENSMUSG00000050708	Ftl1	chr7:45457943-45459884	protein_coding	802.324	53.1466	802.824	53.6466	3.90353	Ftl1	1
ENSMUSG00000004939	ENSMUSG00000004939	Nmrk2	chr10:81198169-81202037	protein_coding	0.0203988	0.0658311	0.520399	0.565831	-0.120754	#N/A	0
ENSMUSG00000035042	ENSMUSG00000035042	Ccl5	chr11:83525777-83530518	protein_coding	6.97079	0	7.47079	0.5	3.90126	#N/A	1
ENSMUSG00000090137	ENSMUSG00000090137	Uba52	chr8:70508262-70510801	protein_coding	576.758	38.1671	577.258	38.6671	3.90004	Uba52	1
ENSMUSG00000004948	ENSMUSG00000004948	Zp3	chr5:135980098-135988624	protein_coding	0.0533527	0	0.553353	0.5	0.146271	#N/A	0
ENSMUSG00000073702	ENSMUSG00000073702	Rpl31	chr1:39367850-39371908	protein_coding	52.4176	3.05641	52.9176	3.55641	3.89525	Rpl31	1
ENSMUSG00000004952	ENSMUSG00000004952	Rasa4	chr5:136083915-136111860	protein_coding	0.644571	1.65281	1.14457	2.15281	-0.911414	Rasa4	0
ENSMUSG00000004961	ENSMUSG00000004961	Syt5	chr7:4539767-4546567	protein_coding	0	0	0.5	0.5	0	#N/A	0
ENSMUSG00000085714	ENSMUSG00000085714	Gm13008	chr4:136003565-136010937		6.93075	0	7.43075	0.5	3.89351	#N/A	1
ENSMUSG00000004988	ENSMUSG00000004988	Fxyd4	chr6:117933728-117937335	protein_coding	0	0.426354	0.5	0.926354	-0.889636	#N/A	0
ENSMUSG00000004994	ENSMUSG00000004994	Ccdc130	chr8:84257794-84270380	protein_coding	2.61785	0.632795	3.11785	1.13279	1.46066	Ccdc130	0
ENSMUSG00000004996	ENSMUSG00000004996	Mri1	chr8:84249905-84257326	protein_coding	2.89057	3.57634	3.39057	4.07634	-0.265747	Mri1	0
ENSMUSG00000030189	ENSMUSG00000030189	Ybx3	chr6:131364857-131388450	protein_coding	74.8478	4.58624	75.3478	5.08624	3.88889	Ybx3	1
ENSMUSG00000005043	ENSMUSG00000005043	Sgsh	chr11:119343424-119355536	protein_coding	2.85838	0.447303	3.35838	0.947303	1.82587	Sgsh	0
ENSMUSG00000005045	ENSMUSG00000005045	Chd5	chr4:152338650-152390194	protein_coding	0.0309303	0.0167084	0.53093	0.516708	0.0391721	#N/A	0
ENSMUSG00000021712	ENSMUSG00000021712	Trim23	chr13:104178796-104203372	protein_coding	8.2609	0.0916877	8.7609	0.591688	3.88817	Trim23	1
ENSMUSG00000041577	ENSMUSG00000041577	Prelp	chr1:133910303-133921414	protein_coding	94.8262	5.94003	95.3262	6.44003	3.88773	Prelp	1
ENSMUSG00000074922	ENSMUSG00000074922	Fam122a	chr19:24476501-24477356	protein_coding	6.90078	0	7.40078	0.5	3.88768	Fam122a	1
ENSMUSG00000061118	ENSMUSG00000061118	Dnajc30	chr5:135064205-135065365	protein_coding	12.3206	0.368922	12.8206	0.868922	3.88309	Dnajc30	1
ENSMUSG00000005087	ENSMUSG00000005087	Cd44	chr2:102811140-102901665	protein_coding	4.43994	0.110949	4.93994	0.610949	3.01537	Cd44	0
ENSMUSG00000005089	ENSMUSG00000005089	Slc1a2	chr2:102658658-102790784	protein_coding	0.0703823	0.112538	0.570382	0.612538	-0.10287	#N/A	0
ENSMUSG00000005102	ENSMUSG00000005102	Eif2ak4	chr2:118388617-118475234	protein_coding	1.44185	1.59172	1.94185	2.09172	-0.107258	Eif2ak4	0
ENSMUSG00000094086	ENSMUSG00000094086	Gm23992	chr9:4371268-4371335		6.86879	0	7.36879	0.5	3.88143	#N/A	1
ENSMUSG00000005107	ENSMUSG00000005107	Slc2a9	chr5:38349272-38503143	protein_coding	1.47698	0	1.97698	0.5	1.9833	Slc2a9	0
ENSMUSG00000005124	ENSMUSG00000005124	Wisp1	chr15:66891319-66923201	protein_coding	0.0397209	0.0151447	0.539721	0.515145	0.0672358	Wisp1	0
ENSMUSG00000005125	ENSMUSG00000005125	Ndrg1	chr15:66929320-66969640	protein_coding	2.28233	0.203509	2.78233	0.703509	1.98365	Ndrg1	0
ENSMUSG00000005131	ENSMUSG00000005131	4930550C14Rik	chr9:53405285-53432803	protein_coding	0	0	0.5	0.5	0	#N/A	0
ENSMUSG00000093826	ENSMUSG00000093826	Gm6900	chr7:10656478-10656820		9.23825	0.160866	9.73825	0.660866	3.88123	#N/A	1
ENSMUSG00000005148	ENSMUSG00000005148	Klf5	chr14:99298690-99313405	protein_coding	0.199438	0	0.699438	0.5	0.484268	Klf5	0
ENSMUSG00000005150	ENSMUSG00000005150	Wdr83	chr8:85075034-85081306	protein_coding	3.84565	1.27287	4.34565	1.77287	1.29349	Wdr83	0
ENSMUSG00000038127	ENSMUSG00000038127	Ccdc50	chr16:27388868-27452218	protein_coding	9.86908	0.204728	10.3691	0.704728	3.87908	Ccdc50	1
ENSMUSG00000070249	ENSMUSG00000070249	Gm23520	chr11:38798170-38798277		6.83646	0	7.33646	0.5	3.87508	#N/A	1
ENSMUSG00000005202	ENSMUSG00000005202	Shbg	chr11:69614803-69617905	protein_coding	0	0	0.5	0.5	0	#N/A	0
ENSMUSG00000004285	ENSMUSG00000004285	Atp6v1f	chr6:29467717-29470512	protein_coding	57.9628	3.48452	58.4628	3.98452	3.87504	Atp6v1f	1
ENSMUSG00000005220	ENSMUSG00000005220	Corin	chr5:72300024-72504473	protein_coding	0	0	0.5	0.5	0	#N/A	0
ENSMUSG00000005225	ENSMUSG00000005225	Plekha8	chr6:54595110-54645839	protein_coding	0.98734	0.932103	1.48734	1.4321	0.0545992	Plekha8	0
ENSMUSG00000005232	ENSMUSG00000005232	G6pc2	chr2:69211072-69227841	protein_coding	0	0	0.5	0.5	0	#N/A	0
ENSMUSG00000005233	ENSMUSG00000005233	Spc25	chr2:69193894-69206194	protein_coding	1.04026	0	1.54026	0.5	1.62317	Spc25	0
ENSMUSG00000005237	ENSMUSG00000005237	Dnahc2	chr11:69420808-69549110	protein_coding	0.00936599	0.00558178	0.509366	0.505582	0.0107582	#N/A	0
ENSMUSG00000005251	ENSMUSG00000005251	Ripk4	chr16:97741932-97763737	protein_coding	0	0	0.5	0.5	0	#N/A	0
ENSMUSG00000021731	ENSMUSG00000021731	Mrps30	chr13:118380109-118387252	protein_coding	17.4875	0.725971	17.9875	1.22597	3.875	Mrps30	1
ENSMUSG00000005267	ENSMUSG00000005267	Zfp287	chr11:62700355-62731905	protein_coding	0.253253	0.0877096	0.753253	0.58771	0.358031	#N/A	0
ENSMUSG00000030224	ENSMUSG00000030224	Strap	chr6:137735077-137751932	protein_coding	16.4818	0.658418	16.9818	1.15842	3.87376	Strap	1
ENSMUSG00000056116	ENSMUSG00000056116	H2-T22	chr17:36037127-36042747	protein_coding	39.3697	2.2227	39.8697	2.7227	3.87218	H2-T22	1
ENSMUSG00000087429	ENSMUSG00000087429	Gm16235	chr10:88444235-88449887		6.79029	0	7.29029	0.5	3.86598	#N/A	1
ENSMUSG00000005320	ENSMUSG00000005320	Fgfr4	chr13:55152639-55168759	protein_coding	0	0	0.5	0.5	0	#N/A	0
ENSMUSG00000005338	ENSMUSG00000005338	Cadm3	chr1:173334253-173367695	protein_coding	0.700883	0	1.20088	0.5	1.2641	Cadm3	0
ENSMUSG00000005339	ENSMUSG00000005339	Fcer1a	chr1:173221270-173227229	protein_coding	0	0	0.5	0.5	0	#N/A	0
ENSMUSG00000034075	ENSMUSG00000034075	Zdhhc5	chr2:84687969-84715180	protein_coding	21.6536	1.01943	22.1536	1.51943	3.86594	Zdhhc5	1
ENSMUSG00000005355	ENSMUSG00000005355	Casp14	chr10:78711996-78718293	protein_coding	0	0	0.5	0.5	0	#N/A	0
ENSMUSG00000005357	ENSMUSG00000005357	Slc1a6	chr10:78780495-78814825	protein_coding	0	0	0.5	0.5	0	#N/A	0
ENSMUSG00000027593	ENSMUSG00000027593	Raly	chr2:154791095-154867261	protein_coding	18.2213	0.784113	18.7213	1.28411	3.86584	Raly	1
ENSMUSG00000033099	ENSMUSG00000033099	Nol12	chr15:78934932-78943634	protein_coding	10.0876	0.227983	10.5876	0.727983	3.86233	Nol12	1
ENSMUSG00000005364	ENSMUSG00000005364	Il5ra	chr6:106711974-106745109	protein_coding	0.0201611	0.00480676	0.520161	0.504807	0.0432273	#N/A	0
ENSMUSG00000005370	ENSMUSG00000005370	Msh6	chr17:87975049-87990883	protein_coding	2.16562	0.565762	2.66562	1.06576	1.32259	Msh6	0
ENSMUSG00000005371	ENSMUSG00000005371	Fbxo11	chr17:87990858-88065291	protein_coding	4.02477	0.425853	4.52477	0.925853	2.28899	Fbxo11	0
ENSMUSG00000035949	ENSMUSG00000035949	Fbxw2	chr2:34804513-34826311	protein_coding	14.1697	0.509833	14.6697	1.00983	3.86065	Fbxw2	1
ENSMUSG00000062981	ENSMUSG00000062981	Mrpl42	chr10:95480805-95501927	protein_coding	47.3786	2.79835	47.8786	3.29835	3.85956	Mrpl42	1
ENSMUSG00000098224	ENSMUSG00000098224	RP24-484D12.1	chr12:71846310-71847291		8.76771	0.138801	9.26771	0.638801	3.85877	#N/A	1
ENSMUSG00000077382	ENSMUSG00000077382	n-R5s200	chr2:84700747-84700860		6.75374	0	7.25374	0.5	3.85873	#N/A	1
ENSMUSG00000005410	ENSMUSG00000005410	Mcm5	chr8:75109527-75128439	protein_coding	0.748381	0.0388985	1.24838	0.538898	1.21197	Mcm5	0
ENSMUSG00000020186	ENSMUSG00000020186	Csrp2	chr10:110920176-110939599	protein_coding	6.75317	0	7.25317	0.5	3.85861	Csrp2	1
ENSMUSG00000023064	ENSMUSG00000023064	Sncg	chr14:34370273-34374789	protein_coding	6.75233	0	7.25233	0.5	3.85844	Sncg	1
ENSMUSG00000062210	ENSMUSG00000062210	Tnfaip8	chr18:49979426-50107173	protein_coding	11.9405	0.358379	12.4405	0.858379	3.85729	Tnfaip8	1
ENSMUSG00000005447	ENSMUSG00000005447	Pafah1b3	chr7:25295048-25297986	protein_coding	3.58572	0.980159	4.08572	1.48016	1.46484	Pafah1b3	0
ENSMUSG00000005465	ENSMUSG00000005465	Il27ra	chr8:84030286-84042575	protein_coding	0.175216	0	0.675216	0.5	0.433421	#N/A	0
ENSMUSG00000081157	ENSMUSG00000081157	Gm13552	chr2:59564267-59564684		10.7079	0.273382	11.2079	0.773382	3.85719	Gm13552	1
ENSMUSG00000005470	ENSMUSG00000005470	Asf1b	chr8:83955506-83970197	protein_coding	2.6898	0	3.1898	0.5	2.67347	Asf1b	0
ENSMUSG00000005474	ENSMUSG00000005474	Myl10	chr5:136693145-136701094	protein_coding	0	0	0.5	0.5	0	#N/A	0
ENSMUSG00000005481	ENSMUSG00000005481	Ddx39	chr8:83715176-83726892	protein_coding	4.45695	2.1229	4.95695	2.6229	0.91829	Ddx39	0
ENSMUSG00000057829	ENSMUSG00000057829	Gm5278	chr3:93433214-93433766		7.11758	0.0262075	7.61758	0.526208	3.85563	#N/A	1
ENSMUSG00000005493	ENSMUSG00000005493	Msh4	chr3:153857146-153906138	protein_coding	0	0	0.5	0.5	0	#N/A	0
ENSMUSG00000005501	ENSMUSG00000005501	Usp40	chr1:87945120-88008551	protein_coding	3.10344	0.0458786	3.60344	0.545879	2.72272	Usp40	0
ENSMUSG00000005503	ENSMUSG00000005503	Evx1	chr6:52313497-52318378	protein_coding	0	0	0.5	0.5	0	#N/A	0
ENSMUSG00000005505	ENSMUSG00000005505	Kbtbd4	chr2:90904739-90911626	protein_coding	3.24071	0.556035	3.74071	1.05604	1.82465	Kbtbd4	0
ENSMUSG00000089210	ENSMUSG00000089210	Gm23386	chr11:19693154-19693298		6.73569	0	7.23569	0.5	3.85513	#N/A	1
ENSMUSG00000062382	ENSMUSG00000062382	Gm10116	chr13:74406395-74407317	protein_coding	244.984	16.4915	245.484	16.9915	3.85274	#N/A	1
ENSMUSG00000040331	ENSMUSG00000040331	Nsmce4a	chr7:130532522-130573118	protein_coding	6.71381	0	7.21381	0.5	3.85076	Nsmce4a	1
ENSMUSG00000005533	ENSMUSG00000005533	Igf1r	chr7:67952858-68226780	protein_coding	1.95439	1.38108	2.45439	1.88108	0.383803	Igf1r	0
ENSMUSG00000034254	ENSMUSG00000034254	Agpat1	chr17:34604261-34613449	protein_coding	37.0551	2.10588	37.5551	2.60588	3.84917	Agpat1	1
ENSMUSG00000005540	ENSMUSG00000005540	Fcer2a	chr8:3681736-3694174	protein_coding	0.00299964	0	0.503	0.5	0.00862927	#N/A	0
ENSMUSG00000005547	ENSMUSG00000005547	Cyp2a5	chr7:26835304-26843548	protein_coding	0	0	0.5	0.5	0	#N/A	0
ENSMUSG00000005553	ENSMUSG00000005553	Atp4a	chr7:30712208-30725535	protein_coding	0	0.317902	0.5	0.817902	-0.71	#N/A	0
ENSMUSG00000021266	ENSMUSG00000021266	Wars	chr12:108860029-108894174	protein_coding	20.2285	0.944656	20.7285	1.44466	3.84282	Wars	1
ENSMUSG00000053094	ENSMUSG00000053094	Tmem248	chr5:130219743-130243765	protein_coding	9.42198	0.191507	9.92198	0.691507	3.84281	Tmem248	1
ENSMUSG00000005580	ENSMUSG00000005580	Adcy9	chr16:4287528-4420498	protein_coding	2.04556	1.0087	2.54556	1.5087	0.754677	Adcy9	0
ENSMUSG00000005583	ENSMUSG00000005583	Mef2c	chr13:83504033-83667079	protein_coding	0.20023	0	0.70023	0.5	0.485901	Mef2c	0
ENSMUSG00000080432	ENSMUSG00000080432	Gm23178	chr14:67274868-67274963		6.66393	0	7.16393	0.5	3.84075	#N/A	1
ENSMUSG00000089782	ENSMUSG00000089782	Gm3531	chr1:97948900-97949389		6.65397	0	7.15397	0.5	3.83874	#N/A	1
ENSMUSG00000005611	ENSMUSG00000005611	Mrvi1	chr7:110868265-110982461	protein_coding	0.16044	0	0.66044	0.5	0.401499	#N/A	0
ENSMUSG00000054452	ENSMUSG00000054452	Aes	chr10:81559493-81566362	protein_coding	100.635	6.56859	101.135	7.06859	3.83872	Aes	1
ENSMUSG00000065750	ENSMUSG00000065750	Gm23346	chr6:70855443-70855579		6.62428	0	7.12428	0.5	3.83274	#N/A	1
ENSMUSG00000035069	ENSMUSG00000035069	Oma1	chr4:103313811-103371868	protein_coding	7.20925	0.0423433	7.70925	0.542343	3.82931	Oma1	1
ENSMUSG00000005628	ENSMUSG00000005628	Tmod4	chr3:95124475-95129209	protein_coding	0.119816	0	0.619816	0.5	0.309912	#N/A	0
ENSMUSG00000005640	ENSMUSG00000005640	Insrr	chr3:87796950-87816101	protein_coding	0	0.0304134	0.5	0.530413	-0.0851891	#N/A	0
ENSMUSG00000005649	ENSMUSG00000005649	Cabp5	chr7:13398131-13408887	protein_coding	0.0734792	0.0711758	0.573479	0.571176	0.00580631	#N/A	0
ENSMUSG00000005656	ENSMUSG00000005656	Snx6	chr12:54746348-54795703	protein_coding	2.75023	0.630523	3.25023	1.13052	1.52355	Snx6	0
ENSMUSG00000024181	ENSMUSG00000024181	Mrpl28	chr17:26123519-26126613	protein_coding	23.1036	1.16092	23.6036	1.66092	3.82895	Mrpl28	1
ENSMUSG00000005672	ENSMUSG00000005672	Kit	chr5:75574915-75656722	protein_coding	0.124043	0	0.624043	0.5	0.319717	#N/A	0
ENSMUSG00000049299	ENSMUSG00000049299	Trappc1	chr11:69323979-69325793	protein_coding	13.2029	0.464246	13.7029	0.964246	3.82894	Trappc1	1
ENSMUSG00000005677	ENSMUSG00000005677	Nr1i3	chr1:171213969-171220701	protein_coding	0.04436	0	0.54436	0.5	0.122633	#N/A	0
ENSMUSG00000005681	ENSMUSG00000005681	Apoa2	chr1:171225053-171226379	protein_coding	1.65807	0	2.15807	0.5	2.10974	Apoa2	0
ENSMUSG00000005682	ENSMUSG00000005682	Pan2	chr10:128303334-128321358	protein_coding	1.05178	1.34133	1.55178	1.84133	-0.246824	Pan2	0
ENSMUSG00000093780	ENSMUSG00000093780	Gm22395	chr5:64107406-64107502		6.59728	0	7.09728	0.5	3.82727	#N/A	1
ENSMUSG00000031320	ENSMUSG00000031320	Rps4x	chrX:102184940-102189394	protein_coding	87.3654	5.69731	87.8654	6.19731	3.82558	Rps4x	1
ENSMUSG00000083166	ENSMUSG00000083166	Gm8648	chrX:157667564-157667785		6.58134	0	7.08134	0.5	3.82402	#N/A	1
ENSMUSG00000005696	ENSMUSG00000005696	Sh2d1a	chrX:42502452-42523697	protein_coding	0.0212798	0.0557763	0.52128	0.555776	-0.0924464	#N/A	0
ENSMUSG00000068969	ENSMUSG00000068969	Rpl32-ps	chr3:69716985-69717393		8.57161	0.141303	9.07161	0.641303	3.82228	#N/A	1
ENSMUSG00000005699	ENSMUSG00000005699	Pard6a	chr8:105701153-105703493	protein_coding	1.67351	0	2.17351	0.5	2.12003	Pard6a	0
ENSMUSG00000005705	ENSMUSG00000005705	Agrp	chr8:105566699-105568298	protein_coding	0	0	0.5	0.5	0	#N/A	0
ENSMUSG00000005716	ENSMUSG00000005716	Pvalb	chr15:78191113-78206400	protein_coding	0	0	0.5	0.5	0	#N/A	0
ENSMUSG00000005718	ENSMUSG00000005718	Tfap4	chr16:4544660-4559720	protein_coding	1.40564	0	1.90564	0.5	1.93028	Tfap4	0
ENSMUSG00000076617	ENSMUSG00000076617	Ighm	chr12:113418949-113422730		7.42238	0.0612906	7.92238	0.561291	3.81911	#N/A	1
ENSMUSG00000005763	ENSMUSG00000005763	Cd247	chr1:165788680-165877276	protein_coding	0.163343	0	0.663343	0.5	0.407827	#N/A	0
ENSMUSG00000005774	ENSMUSG00000005774	Rfx5	chr3:94954074-94961561	protein_coding	1.08983	2.06561	1.58983	2.56561	-0.690429	Rfx5	0
ENSMUSG00000025509	ENSMUSG00000025509	Pnpla2	chr7:141455197-141460743	protein_coding	2005.35	142.024	2005.85	142.524	3.81494	Pnpla2	1
ENSMUSG00000005800	ENSMUSG00000005800	Mmp8	chr9:7558428-7568486	protein_coding	0.0272423	0	0.527242	0.5	0.076538	Mmp8	0
ENSMUSG00000005802	ENSMUSG00000005802	Slc30a4	chr2:122681232-122702663	protein_coding	2.67587	0.0247862	3.17587	0.524786	2.59735	Slc30a4	0
ENSMUSG00000003199	ENSMUSG00000003199	Mpnd	chr17:56005710-56016790	protein_coding	26.572	1.4239	27.072	1.9239	3.8147	Mpnd	1
ENSMUSG00000026617	ENSMUSG00000026617	Bpnt1	chr1:185332148-185357777	protein_coding	21.5594	1.06906	22.0594	1.56906	3.81342	Bpnt1	1
ENSMUSG00000029207	ENSMUSG00000029207	Apbb2	chr5:66298860-66618828	protein_coding	65.2636	4.18462	65.7636	4.68462	3.81129	Apbb2	1
ENSMUSG00000078126	ENSMUSG00000078126	Rpl23a-ps3	chr14:34170654-34171168	protein_coding	43.0525	2.60335	43.5525	3.10335	3.81086	#N/A	1
ENSMUSG00000005824	ENSMUSG00000005824	Tnfsf14	chr17:57189491-57194189	protein_coding	0	0	0.5	0.5	0	#N/A	0
ENSMUSG00000005836	ENSMUSG00000005836	Gata6	chr18:11052509-11085635	protein_coding	1.54678	0.122958	2.04678	0.622958	1.71615	Gata6	0
ENSMUSG00000057278	ENSMUSG00000057278	Snrpg	chr6:86371582-86378902	protein_coding	11.576	0.36102	12.076	0.86102	3.80995	Snrpg	1
ENSMUSG00000005864	ENSMUSG00000005864	Cnga2	chrX:71991848-72010218	protein_coding	0	0	0.5	0.5	0	Cnga2	0
ENSMUSG00000005871	ENSMUSG00000005871	Apc	chr18:34220923-34322189	protein_coding	2.21988	1.61873	2.71988	2.11873	0.360343	Apc	0
ENSMUSG00000093115	ENSMUSG00000093115	Gm25972	chr2:84150054-84150155		6.4816	0	6.9816	0.5	3.80356	#N/A	1
ENSMUSG00000060147	ENSMUSG00000060147	Serpinb6a	chr13:33917917-34002794	protein_coding	29.356	1.64077	29.856	2.14077	3.80182	Serpinb6a	1
ENSMUSG00000030888	ENSMUSG00000030888	Rrp8	chr7:105732206-105737376	protein_coding	8.48955	0.145407	8.98955	0.645407	3.79997	Rrp8	1
ENSMUSG00000005883	ENSMUSG00000005883	Spo11	chr2:172977699-172993576	protein_coding	0	0	0.5	0.5	0	#N/A	0
ENSMUSG00000028788	ENSMUSG00000028788	Ptp4a2	chr4:129811218-129850003	protein_coding	15.2521	0.631838	15.7521	1.13184	3.7988	Ptp4a2	1
ENSMUSG00000005891	ENSMUSG00000005891	Prl4a1	chr13:28016211-28023548	protein_coding	0	0	0.5	0.5	0	#N/A	0
ENSMUSG00000005892	ENSMUSG00000005892	Trh	chr6:92242060-92244650	protein_coding	0	0	0.5	0.5	0	#N/A	0
ENSMUSG00000005893	ENSMUSG00000005893	Nr2c2	chr6:92091389-92173057	protein_coding	2.24019	3.49798	2.74019	3.99798	-0.544995	Nr2c2	0
ENSMUSG00000005897	ENSMUSG00000005897	Nr2c1	chr10:94148022-94197211	protein_coding	2.64303	1.04051	3.14303	1.54051	1.02875	Nr2c1	0
ENSMUSG00000005899	ENSMUSG00000005899	Smpd4	chr16:17619353-17644828	protein_coding	3.30412	2.38701	3.80412	2.88701	0.397987	Smpd4	0
ENSMUSG00000005907	ENSMUSG00000005907	Pex1	chr5:3596065-3637232	protein_coding	4.48283	0.279816	4.98283	0.779816	2.67576	Pex1	0
ENSMUSG00000005917	ENSMUSG00000005917	Otx1	chr11:21994763-22002897	protein_coding	0.136558	0.0992451	0.636558	0.599245	0.0871458	#N/A	0
ENSMUSG00000066724	ENSMUSG00000066724	Gm10175	chr7:23946648-23947237	protein_coding	21.2032	1.06567	21.7032	1.56567	3.79306	#N/A	1
ENSMUSG00000005947	ENSMUSG00000005947	Itgae	chr11:73090582-73147446	protein_coding	0.222117	0.101844	0.722117	0.601844	0.262843	Itgae	0
ENSMUSG00000022519	ENSMUSG00000022519	Srl	chr16:4480215-4541816	protein_coding	6.42586	0	6.92586	0.5	3.79199	Srl	1
ENSMUSG00000005950	ENSMUSG00000005950	P2rx5	chr11:73160420-73172685	protein_coding	2.63538	2.52218	3.13538	3.02218	0.0530507	P2rx5	0
ENSMUSG00000005951	ENSMUSG00000005951	Shpk	chr11:73199459-73224511	protein_coding	1.86535	0.816455	2.36535	1.31645	0.845395	Shpk	0
ENSMUSG00000005952	ENSMUSG00000005952	Trpv1	chr11:73234291-73261242	protein_coding	0	0.293865	0.5	0.793865	-0.666966	#N/A	0
ENSMUSG00000005958	ENSMUSG00000005958	Ephb3	chr16:21204754-21223305	protein_coding	0.55927	0.438597	1.05927	0.938597	0.174493	Ephb3	0
ENSMUSG00000005968	ENSMUSG00000005968	Tuft1	chr3:94612756-94658872	protein_coding	0.0937897	1.92852	0.59379	2.42852	-2.03205	Tuft1	0
ENSMUSG00000060032	ENSMUSG00000060032	H2afj	chr6:136808247-136810074	protein_coding	10.8574	0.32176	11.3574	0.82176	3.78877	H2afj	1
ENSMUSG00000005980	ENSMUSG00000005980	Dnase1	chr16:4036941-4040024	protein_coding	0.166913	1.31953	0.666913	1.81953	-1.448	#N/A	0
ENSMUSG00000039607	ENSMUSG00000039607	Rbms3	chr9:116572745-117629913	protein_coding	7.85175	0.104577	8.35175	0.604577	3.78808	Rbms3	1
ENSMUSG00000022174	ENSMUSG00000022174	Dad1	chr14:54235478-54254104	protein_coding	23.3102	1.22522	23.8102	1.72522	3.78673	Dad1	1
ENSMUSG00000005983	ENSMUSG00000005983	1700037C18Rik	chr16:3895178-3908689	protein_coding	0.962217	0.0122548	1.46222	0.512255	1.51322	1700037C18Rik	0
ENSMUSG00000005986	ENSMUSG00000005986	Ankrd13d	chr19:4270179-4283137	protein_coding	0.117246	0	0.617246	0.5	0.303917	#N/A	0
ENSMUSG00000005994	ENSMUSG00000005994	Tyrp1	chr4:80834122-80851719	protein_coding	0	0	0.5	0.5	0	#N/A	0
ENSMUSG00000037071	ENSMUSG00000037071	Scd1	chr19:44394450-44407709	protein_coding	2331.71	168.727	2332.21	169.227	3.78467	Scd1	1
ENSMUSG00000006007	ENSMUSG00000006007	Pdc	chr1:150319416-150333905	protein_coding	0	0	0.5	0.5	0	#N/A	0
ENSMUSG00000080242	ENSMUSG00000080242	Gm15487	chr6:37805974-37807091		34.5223	2.04167	35.0223	2.54167	3.78443	#N/A	1
ENSMUSG00000039824	ENSMUSG00000039824	Myl6b	chr10:128494156-128498685	protein_coding	7.94608	0.113312	8.44608	0.613312	3.78359	Myl6b	1
ENSMUSG00000006019	ENSMUSG00000006019	Dhx34	chr7:16197146-16222037	protein_coding	1.75605	1.7292	2.25605	2.2292	0.017273	Dhx34	0
ENSMUSG00000006021	ENSMUSG00000006021	Kptn	chr7:16119894-16127516	protein_coding	3.84454	0.643295	4.34454	1.14329	1.92601	Kptn	0
ENSMUSG00000091449	ENSMUSG00000091449	Gm10269	chr18:20682591-20682963	protein_coding	37.2389	2.24312	37.7389	2.74312	3.78216	#N/A	1
ENSMUSG00000001056	ENSMUSG00000001056	Nhp2	chr11:51619734-51623714	protein_coding	15.529	0.667771	16.029	1.16777	3.77886	Nhp2	1
ENSMUSG00000006056	ENSMUSG00000006056	Calcoco2	chr11:96099325-96111964	protein_coding	0	0	0.5	0.5	0	#N/A	0
ENSMUSG00000028066	ENSMUSG00000028066	Pmf1	chr3:88394142-88410316	protein_coding	7.56617	0.0883884	8.06617	0.588388	3.77704	Pmf1	1
ENSMUSG00000075296	ENSMUSG00000075296	Aldh3b2	chr19:3972327-3981645	protein_coding	36.5608	2.20938	37.0608	2.70938	3.77386	Aldh3b2	1
ENSMUSG00000028669	ENSMUSG00000028669	Pithd1	chr4:135975459-135987264	protein_coding	9.63175	0.240955	10.1318	0.740955	3.77335	Pithd1	1
ENSMUSG00000089944	ENSMUSG00000089944	Gm8292	chr1:55335366-55335883		25.1872	1.38093	25.6872	1.88093	3.77153	#N/A	1
ENSMUSG00000006134	ENSMUSG00000006134	Crkl	chr16:17451986-17486255	protein_coding	3.17979	0.927763	3.67979	1.42776	1.36587	Crkl	0
ENSMUSG00000006143	ENSMUSG00000006143	Upk3bl	chr5:136054491-136064326	protein_coding	0	0	0.5	0.5	0	#N/A	0
ENSMUSG00000006154	ENSMUSG00000006154	Eps8l1	chr7:4460673-4479404	protein_coding	0.806647	0	1.30665	0.5	1.38587	#N/A	0
ENSMUSG00000028266	ENSMUSG00000028266	Lmo4	chr3:144188529-144205220	protein_coding	14.0416	0.565122	14.5416	1.06512	3.7711	Lmo4	1
ENSMUSG00000006179	ENSMUSG00000006179	Prss16	chr13:22002175-22009742	protein_coding	0.0984401	0	0.59844	0.5	0.259279	#N/A	0
ENSMUSG00000006191	ENSMUSG00000006191	Cdkal1	chr13:29191745-29855674	protein_coding	3.96583	2.99704	4.46583	3.49704	0.352794	Cdkal1	0
ENSMUSG00000006200	ENSMUSG00000006200	Rhox6	chrX:37826909-37829857	protein_coding	0	0	0.5	0.5	0	#N/A	0
ENSMUSG00000006204	ENSMUSG00000006204	5430419D17Rik	chr7:131174401-131250945	protein_coding	0	0	0.5	0.5	0	#N/A	0
ENSMUSG00000020368	ENSMUSG00000020368	Canx	chr11:50293960-50325673	protein_coding	65.9078	4.3643	66.4078	4.8643	3.77105	Canx	1
ENSMUSG00000018899	ENSMUSG00000018899	Irf1	chr11:53770013-53778374	protein_coding	6.3138	0	6.8138	0.5	3.76846	Irf1	1
ENSMUSG00000006216	ENSMUSG00000006216	Clcnkb	chr4:141404352-141416014	protein_coding	0	0	0.5	0.5	0	#N/A	0
ENSMUSG00000006218	ENSMUSG00000006218	Fam131c	chr4:141368219-141384175	protein_coding	0	0	0.5	0.5	0	Fam131c	0
ENSMUSG00000006219	ENSMUSG00000006219	Fblim1	chr4:141576061-141606096	protein_coding	2.73549	0.689268	3.23549	1.18927	1.44391	Fblim1	0
ENSMUSG00000006221	ENSMUSG00000006221	Hspb7	chr4:141420778-141425311	protein_coding	1.62029	0.145784	2.12029	0.645784	1.71514	Hspb7	0
ENSMUSG00000006235	ENSMUSG00000006235	Epor	chr9:21958898-21963576	protein_coding	0.149324	0	0.649324	0.5	0.37701	#N/A	0
ENSMUSG00000006241	ENSMUSG00000006241	Ccdc159	chr9:21927470-21935872	protein_coding	0.317415	0.270253	0.817415	0.770253	0.0857363	Ccdc159	0
ENSMUSG00000006262	ENSMUSG00000006262	Mob1b	chr5:88720854-88762058	protein_coding	3.81374	0.379836	4.31374	0.879836	2.29363	Mob1b	0
ENSMUSG00000006269	ENSMUSG00000006269	Atp6v1b1	chr6:83743016-83758809	protein_coding	0	0	0.5	0.5	0	#N/A	0
ENSMUSG00000006270	ENSMUSG00000006270	Vax1	chr19:59166186-59170978	protein_coding	0	0	0.5	0.5	0	#N/A	0
ENSMUSG00000034158	ENSMUSG00000034158	Lrrc58	chr16:37868388-37888858	protein_coding	37.1402	2.26837	37.6402	2.76837	3.76517	Lrrc58	1
ENSMUSG00000006276	ENSMUSG00000006276	Eps15l1	chr8:72341000-72421474	protein_coding	3.96682	1.60168	4.46682	2.10168	1.08771	Eps15l1	0
ENSMUSG00000006281	ENSMUSG00000006281	Tep1	chr14:50824061-50870560	protein_coding	2.39098	0.925549	2.89098	1.42555	1.02004	Tep1	0
ENSMUSG00000006288	ENSMUSG00000006288	Ttc5	chr14:50765414-50785518	protein_coding	3.57696	0.154661	4.07696	0.654661	2.63867	Ttc5	0
ENSMUSG00000054312	ENSMUSG00000054312	Mrps21	chr3:95862633-95871519	protein_coding	45.1033	2.85819	45.6033	3.35819	3.76338	Mrps21	1
ENSMUSG00000018565	ENSMUSG00000018565	Elp5	chr11:69968221-69982517	protein_coding	13.1024	0.505855	13.6024	1.00585	3.75737	Elp5	1
ENSMUSG00000084517	ENSMUSG00000084517	Gm22480	chr3:49491350-49491478		6.24252	0	6.74252	0.5	3.75329	#N/A	1
ENSMUSG00000063656	ENSMUSG00000063656	Gm10135	chr5:72965807-72974702	protein_coding	6.23298	0	6.73298	0.5	3.75125	#N/A	1
ENSMUSG00000092395	ENSMUSG00000092395	Gm20463	chr17:34601150-34601576		6.22321	0	6.72321	0.5	3.74915	#N/A	1
ENSMUSG00000006310	ENSMUSG00000006310	Zbtb32	chr7:30589680-30598909	protein_coding	0.115701	0.229881	0.615701	0.729881	-0.245431	#N/A	0
ENSMUSG00000006311	ENSMUSG00000006311	Etv2	chr7:30633615-30635852	protein_coding	0	0	0.5	0.5	0	#N/A	0
ENSMUSG00000006313	ENSMUSG00000006313	Upk1a	chr7:30603091-30612734	protein_coding	0	0.193228	0.5	0.693228	-0.471402	#N/A	0
ENSMUSG00000017929	ENSMUSG00000017929	B4galt5	chr2:167298443-167349183	protein_coding	19.8525	1.01464	20.3525	1.51464	3.74816	B4galt5	1
ENSMUSG00000068921	ENSMUSG00000068921	Dap3	chr3:88920802-88951181	protein_coding	20.1627	1.03864	20.6627	1.53864	3.7473	Dap3	1
ENSMUSG00000006335	ENSMUSG00000006335	Tfpt	chr7:3620323-3629929	protein_coding	1.63506	1.81107	2.13506	2.31107	-0.114284	Tfpt	0
ENSMUSG00000006342	ENSMUSG00000006342	Susd2	chr10:75636618-75644008	protein_coding	1.48624	0.190843	1.98624	0.690843	1.52361	Susd2	0
ENSMUSG00000006344	ENSMUSG00000006344	Ggt5	chr10:75589380-75616968	protein_coding	3.79651	0.751402	4.29651	1.2514	1.77962	Ggt5	0
ENSMUSG00000006345	ENSMUSG00000006345	Ggt1	chr10:75561603-75586200	protein_coding	0	0	0.5	0.5	0	#N/A	0
ENSMUSG00000098181	ENSMUSG00000098181	Rps12l2	chr8:36025752-36026133		6.41245	0.0157209	6.91245	0.515721	3.74453	#N/A	1
ENSMUSG00000006360	ENSMUSG00000006360	Crip1	chr12:113152011-113153877	protein_coding	2.08908	2.48173	2.58908	2.98173	-0.20371	Crip1	0
ENSMUSG00000006373	ENSMUSG00000006373	Pgrmc1	chrX:36598205-36606079	protein_coding	50.1972	3.28322	50.6972	3.78322	3.74422	Pgrmc1	1
ENSMUSG00000085442	ENSMUSG00000085442	Gm3362	chr15:37943326-37943792		23.8528	1.31853	24.3528	1.81853	3.74324	Gm3362	1
ENSMUSG00000006378	ENSMUSG00000006378	Gcat	chr15:79030873-79043558	protein_coding	0.75616	0	1.25616	0.5	1.32902	Gcat	0
ENSMUSG00000006386	ENSMUSG00000006386	Tek	chr4:94739288-94874976	protein_coding	0.328186	0	0.828186	0.5	0.728027	Tek	0
ENSMUSG00000006389	ENSMUSG00000006389	Mpl	chr4:118442414-118457513	protein_coding	0	0	0.5	0.5	0	#N/A	0
ENSMUSG00000029401	ENSMUSG00000029401	Rilpl2	chr5:124463264-124478366	protein_coding	18.2605	0.901875	18.7605	1.40187	3.74227	Rilpl2	1
ENSMUSG00000020477	ENSMUSG00000020477	Mrps24	chr11:5703982-5715680	protein_coding	31.089	1.87047	31.589	2.37047	3.73618	Mrps24	1
ENSMUSG00000006395	ENSMUSG00000006395	Hyi	chr4:118359989-118362744	protein_coding	2.21054	0.325399	2.71054	0.825399	1.71542	Hyi	0
ENSMUSG00000006398	ENSMUSG00000006398	Cdc20	chr4:118432900-118437352	protein_coding	0.553116	0	1.05312	0.5	1.07466	Cdc20	0
ENSMUSG00000006403	ENSMUSG00000006403	Adamts4	chr1:171250420-171260637	protein_coding	0.805016	0	1.30502	0.5	1.38407	Adamts4	0
ENSMUSG00000006411	ENSMUSG00000006411	Pvrl4	chr1:171370098-171388598	protein_coding	0.188146	0.193606	0.688146	0.693606	-0.0114017	#N/A	0
ENSMUSG00000024962	ENSMUSG00000024962	Vegfb	chr19:6982472-6987651	protein_coding	66.7246	4.55648	67.2246	5.05648	3.73278	Vegfb	1
ENSMUSG00000019818	ENSMUSG00000019818	Cd164	chr10:41519499-41531042	protein_coding	54.4015	3.63	54.9015	4.13	3.73263	Cd164	1
ENSMUSG00000028690	ENSMUSG00000028690	Mmachc	chr4:116702278-116708406	protein_coding	10.985	0.364755	11.485	0.864755	3.73132	Mmachc	1
ENSMUSG00000006435	ENSMUSG00000006435	Neurl1a	chr19:47178819-47259440	protein_coding	0.188096	0.86995	0.688096	1.36995	-0.993441	#N/A	0
ENSMUSG00000071532	ENSMUSG00000071532	Gm10335	chr10:14523061-14523571	protein_coding	40.7616	2.6073	41.2616	3.1073	3.73107	#N/A	1
ENSMUSG00000006445	ENSMUSG00000006445	Epha2	chr4:141301239-141329384	protein_coding	0.207305	0.963012	0.707305	1.46301	-1.04854	#N/A	0
ENSMUSG00000006456	ENSMUSG00000006456	Rbm14	chr19:4800568-4811634	protein_coding	1.70544	1.5321	2.20544	2.0321	0.118095	Rbm14	0
ENSMUSG00000006457	ENSMUSG00000006457	Actn3	chr19:4861222-4877909	protein_coding	0.447792	0.089442	0.947792	0.589442	0.685221	Actn3	0
ENSMUSG00000006462	ENSMUSG00000006462	A530013C23Rik	chr2:167691176-167729172		0.295255	1.55872	0.795255	2.05872	-1.37226	#N/A	0
ENSMUSG00000006463	ENSMUSG00000006463	Zdhhc24	chr19:4878667-4885397	protein_coding	0.452555	0.157033	0.952555	0.657033	0.535837	Zdhhc24	0
ENSMUSG00000006464	ENSMUSG00000006464	Bbs1	chr19:4886897-4906627	protein_coding	0.274771	0.202122	0.774771	0.702122	0.142048	Bbs1	0
ENSMUSG00000006469	ENSMUSG00000006469	Slc34a3	chr2:25228897-25234364	protein_coding	0	0	0.5	0.5	0	#N/A	0
ENSMUSG00000006471	ENSMUSG00000006471	Ndor1	chr2:25244820-25256022	protein_coding	1.60994	1.27866	2.10994	1.77866	0.246411	Ndor1	0
ENSMUSG00000026698	ENSMUSG00000026698	Pigc	chr1:161969185-162027106	protein_coding	11.4711	0.401996	11.9711	0.901996	3.73029	Pigc	1
ENSMUSG00000006488	ENSMUSG00000006488	Prl7a1	chr13:27633379-27642474	protein_coding	0	0	0.5	0.5	0	#N/A	0
ENSMUSG00000006490	ENSMUSG00000006490	Prl8a9	chr13:27558008-27564604	protein_coding	0	0	0.5	0.5	0	#N/A	0
ENSMUSG00000024845	ENSMUSG00000024845	Tmem134	chr19:4125933-4132307		58.3693	3.93699	58.8693	4.43699	3.72986	Tmem134	1
ENSMUSG00000068120	ENSMUSG00000068120	Gm10231	chr17:5816053-5816700		27.2624	1.59275	27.7624	2.09275	3.72966	#N/A	1
ENSMUSG00000006522	ENSMUSG00000006522	Itih3	chr14:30908572-30923760	protein_coding	0	0	0.5	0.5	0	#N/A	0
ENSMUSG00000024277	ENSMUSG00000024277	Mapre2	chr18:23752332-23893861	protein_coding	6.691	0.0421428	7.191	0.542143	3.72945	Mapre2	1
ENSMUSG00000006527	ENSMUSG00000006527	Sfmbt1	chr14:30714848-30822713	protein_coding	3.50021	2.12149	4.00021	2.62149	0.609689	Sfmbt1	0
ENSMUSG00000006529	ENSMUSG00000006529	Itih1	chr14:30929179-30943289	protein_coding	0	0	0.5	0.5	0	#N/A	0
ENSMUSG00000006538	ENSMUSG00000006538	Ihh	chr1:74945318-74951651	protein_coding	0	0	0.5	0.5	0	#N/A	0
ENSMUSG00000006542	ENSMUSG00000006542	Prkag3	chr1:74739498-74749221	protein_coding	0.089393	0	0.589393	0.5	0.237302	#N/A	0
ENSMUSG00000006546	ENSMUSG00000006546	Cryba2	chr1:74889933-74893143	protein_coding	0	0	0.5	0.5	0	#N/A	0
ENSMUSG00000006567	ENSMUSG00000006567	Atp7b	chr8:21992784-22060305	protein_coding	0.0197788	0	0.519779	0.5	0.0559697	#N/A	0
ENSMUSG00000006570	ENSMUSG00000006570	Defb2	chr8:21839925-21843482	protein_coding	0	0	0.5	0.5	0	#N/A	0
ENSMUSG00000006574	ENSMUSG00000006574	Slc4a1	chr11:102348823-102366203	protein_coding	0	0	0.5	0.5	0	#N/A	0
ENSMUSG00000006575	ENSMUSG00000006575	Rundc3a	chr11:102393402-102402555	protein_coding	1.39568	0.0446393	1.89568	0.544639	1.79934	Rundc3a	0
ENSMUSG00000006576	ENSMUSG00000006576	Slc4a3	chr1:75546265-75562172	protein_coding	1.77389	1.24038	2.27389	1.74038	0.38576	Slc4a3	0
ENSMUSG00000006586	ENSMUSG00000006586	Runx1t1	chr4:13743435-13893649	protein_coding	1.77327	0.240702	2.27327	0.740702	1.6178	Runx1t1	0
ENSMUSG00000082241	ENSMUSG00000082241	Gm15776	chr16:22295000-22295457		6.12784	0	6.62784	0.5	3.72854	Gm15776	1
ENSMUSG00000024480	ENSMUSG00000024480	Ap3s1	chr18:46741916-46790826	protein_coding	57.3938	3.87064	57.8938	4.37064	3.72749	Ap3s1	1
ENSMUSG00000006638	ENSMUSG00000006638	Abhd1	chr5:30950065-30955091		0.364503	0	0.864503	0.5	0.789943	Abhd1	0
ENSMUSG00000064337	ENSMUSG00000064337	mt-Rnr1	chrM:69-1024		1528.44	115.059	1528.94	115.559	3.72583	#N/A	1
ENSMUSG00000006642	ENSMUSG00000006642	Tcf23	chr5:30968676-30977018	protein_coding	0.429205	0.132691	0.929205	0.632691	0.554496	#N/A	0
ENSMUSG00000006649	ENSMUSG00000006649	Nphs1	chr7:30458314-30487223	protein_coding	0.0254009	0.0580517	0.525401	0.558052	-0.0869801	#N/A	0
ENSMUSG00000006651	ENSMUSG00000006651	Aplp1	chr7:30434980-30445582	protein_coding	0.531886	0	1.03189	0.5	1.04528	Aplp1	0
ENSMUSG00000098123	ENSMUSG00000098123	RP24-232F23.2	chr17:61780914-61781632		14.9585	0.67149	15.4585	1.17149	3.72198	#N/A	1
ENSMUSG00000006675	ENSMUSG00000006675	P4htm	chr9:108578825-108597600	protein_coding	0.45308	0	0.95308	0.5	0.930669	P4htm	0
ENSMUSG00000024854	ENSMUSG00000024854	Pold4	chr19:4231898-4233631	protein_coding	20.2834	1.07625	20.7834	1.57625	3.72086	Pold4	1
ENSMUSG00000006678	ENSMUSG00000006678	Pola1	chrX:93304766-93632155	protein_coding	0.37464	0.343256	0.87464	0.843256	0.0527187	Pola1	0
ENSMUSG00000003813	ENSMUSG00000003813	Rad23a	chr8:84834018-84840665	protein_coding	35.8897	2.27143	36.3897	2.77143	3.71483	Rad23a	1
ENSMUSG00000006705	ENSMUSG00000006705	Pknox1	chr17:31564748-31607680	protein_coding	2.85516	0.351091	3.35516	0.851091	1.979	Pknox1	0
ENSMUSG00000006711	ENSMUSG00000006711	D130043K22Rik	chr13:24845134-24901270	protein_coding	0	0	0.5	0.5	0	#N/A	0
ENSMUSG00000006715	ENSMUSG00000006715	Gmnn	chr13:24751844-24761923	protein_coding	0.824313	0	1.32431	0.5	1.40524	Gmnn	0
ENSMUSG00000017428	ENSMUSG00000017428	Psmd11	chr11:80428614-80473248	protein_coding	24.4357	1.40215	24.9357	1.90215	3.71251	Psmd11	1
ENSMUSG00000006720	ENSMUSG00000006720	Zfp184	chr13:21945093-21960779	protein_coding	0.519612	0	1.01961	0.5	1.02802	#N/A	0
ENSMUSG00000006724	ENSMUSG00000006724	Cyp27b1	chr10:127048249-127053006	protein_coding	0	0	0.5	0.5	0	#N/A	0
ENSMUSG00000064360	ENSMUSG00000064360	mt-Nd3	chrM:9458-9806	protein_coding	192.241	14.2156	192.741	14.7156	3.71125	#N/A	1
ENSMUSG00000006731	ENSMUSG00000006731	B4galnt1	chr10:127165155-127172340	protein_coding	1.21486	0.450632	1.71486	0.950632	0.851132	B4galnt1	0
ENSMUSG00000006732	ENSMUSG00000006732	Mettl1	chr10:127041413-127046365	protein_coding	1.13108	0.111062	1.63108	0.611062	1.41644	Mettl1	0
ENSMUSG00000057130	ENSMUSG00000057130	Txnl4a	chr18:80206794-80223533	protein_coding	8.06389	0.155833	8.56389	0.655833	3.70687	Txnl4a	1
ENSMUSG00000006740	ENSMUSG00000006740	Kif5b	chr18:6201001-6242174	protein_coding	3.7992	0.984828	4.2992	1.48483	1.53377	Kif5b	0
ENSMUSG00000006763	ENSMUSG00000006763	Saal1	chr7:46686107-46710680	protein_coding	1.42912	0.528647	1.92912	1.02865	0.907195	Saal1	0
ENSMUSG00000006764	ENSMUSG00000006764	Tph2	chr10:115078640-115185022	protein_coding	0	0	0.5	0.5	0	#N/A	0
ENSMUSG00000006777	ENSMUSG00000006777	Krt23	chr11:99477973-99493137	protein_coding	0.088533	0	0.588533	0.5	0.235195	Krt23	0
ENSMUSG00000006782	ENSMUSG00000006782	Cnp	chr11:100574903-100591729	protein_coding	1.85672	0.356094	2.35672	0.856094	1.46094	Cnp	0
ENSMUSG00000090224	ENSMUSG00000090224	Gm15974	chr17:68371279-68371810		6.02716	0	6.52716	0.5	3.70646	#N/A	1
ENSMUSG00000081534	ENSMUSG00000081534	Slc48a1	chr15:97784354-97792692	protein_coding	16.646	0.815203	17.146	1.3152	3.70451	Slc48a1	1
ENSMUSG00000036299	ENSMUSG00000036299	BC031181	chr18:75005899-75009933	protein_coding	16.7881	0.830096	17.2881	1.3301	3.70018	BC031181	1
ENSMUSG00000006850	ENSMUSG00000006850	Tmco6	chr18:36735067-36742391	protein_coding	0.451184	0	0.951184	0.5	0.927796	Tmco6	0
ENSMUSG00000006906	ENSMUSG00000006906	Stambp	chr6:83543205-83572504	protein_coding	1.65615	0	2.15615	0.5	2.10846	Stambp	0
ENSMUSG00000006920	ENSMUSG00000006920	Ezh1	chr11:101191114-101226463	protein_coding	2.65055	3.17629	3.15055	3.67629	-0.222647	Ezh1	0
ENSMUSG00000006930	ENSMUSG00000006930	Hap1	chr11:100347326-100356128	protein_coding	0.586756	1.34047	1.08676	1.84047	-0.760046	#N/A	0
ENSMUSG00000050628	ENSMUSG00000050628	Ubald2	chr11:116434093-116439077	protein_coding	14.2919	0.638637	14.7919	1.13864	3.69943	Ubald2	1
ENSMUSG00000054604	ENSMUSG00000054604	Cggbp1	chr16:64851995-64859507	protein_coding	8.72254	0.210258	9.22254	0.710258	3.69875	Cggbp1	1
ENSMUSG00000003848	ENSMUSG00000003848	Nob1	chr8:107412485-107425051	protein_coding	6.47825	0.0376286	6.97825	0.537629	3.69818	Nob1	1
ENSMUSG00000006948	ENSMUSG00000006948	Klk4	chr7:43881171-43885804	protein_coding	0	0	0.5	0.5	0	#N/A	0
ENSMUSG00000006958	ENSMUSG00000006958	Chrd	chr16:20733126-20742384	protein_coding	0.381728	0.866589	0.881728	1.36659	-0.632174	Chrd	0
ENSMUSG00000079437	ENSMUSG00000079437	Tmem179b	chr19:8772521-8774467	protein_coding	5.98653	0	6.48653	0.5	3.69745	Tmem179b	1
ENSMUSG00000007021	ENSMUSG00000007021	Syngr3	chr17:24685091-24689955	protein_coding	0	0	0.5	0.5	0	#N/A	0
ENSMUSG00000030844	ENSMUSG00000030844	Rgs10	chr7:128373620-128418758	protein_coding	5.96959	0	6.46959	0.5	3.69367	Rgs10	1
ENSMUSG00000007030	ENSMUSG00000007030	Vwa7	chr17:35016578-35026741	protein_coding	0.0176916	0.00980021	0.517692	0.5098	0.0221609	#N/A	0
ENSMUSG00000007033	ENSMUSG00000007033	Hspa1l	chr17:34972702-34979284	protein_coding	0.0540632	0	0.554063	0.5	0.148122	Hspa1l	0
ENSMUSG00000007034	ENSMUSG00000007034	Slc44a4	chr17:34914465-34930436	protein_coding	0	0	0.5	0.5	0	#N/A	0
ENSMUSG00000007035	ENSMUSG00000007035	Msh5	chr17:35028604-35046745	protein_coding	0.159644	0	0.659644	0.5	0.39976	#N/A	0
ENSMUSG00000097954	ENSMUSG00000097954	RP23-180L12.4	chr15:84866316-84867318		10.9567	0.386837	11.4567	0.886837	3.69138	#N/A	1
ENSMUSG00000029073	ENSMUSG00000029073	Gltpd1	chr4:155864722-155869440	protein_coding	7.65105	0.131867	8.15105	0.631867	3.68929	Gltpd1	1
ENSMUSG00000007039	ENSMUSG00000007039	Ddah2	chr17:35059034-35062095	protein_coding	1.53393	1.25106	2.03393	1.75106	0.216042	Ddah2	0
ENSMUSG00000063556	ENSMUSG00000063556	Gm10132	chr14:77251800-77252327	protein_coding	38.8096	2.54803	39.3096	3.04803	3.68893	#N/A	1
ENSMUSG00000018677	ENSMUSG00000018677	Slc25a39	chr11:102402984-102407946	protein_coding	125.162	9.27861	125.662	9.77861	3.68378	Slc25a39	1
ENSMUSG00000007080	ENSMUSG00000007080	Pole	chr5:110286305-110337474	protein_coding	0.19222	0.0413948	0.69222	0.541395	0.35455	#N/A	0
ENSMUSG00000021243	ENSMUSG00000021243	Fcf1	chr12:84970896-84983303	protein_coding	10.0084	0.319082	10.5084	0.819082	3.68139	Fcf1	1
ENSMUSG00000007107	ENSMUSG00000007107	Atp1a4	chr1:172223512-172258414	protein_coding	2.17807	0.714125	2.67807	1.21413	1.14128	#N/A	0
ENSMUSG00000007122	ENSMUSG00000007122	Casq1	chr1:172209893-172219868	protein_coding	0.0743529	0	0.574353	0.5	0.200009	Casq1	0
ENSMUSG00000007207	ENSMUSG00000007207	Stx1a	chr5:135023481-135051100	protein_coding	0.186717	0.0761204	0.686717	0.57612	0.253345	#N/A	0
ENSMUSG00000007209	ENSMUSG00000007209	Ceacam9	chr7:16721928-16726110	protein_coding	0	0	0.5	0.5	0	#N/A	0
ENSMUSG00000007216	ENSMUSG00000007216	Zfp775	chr6:48613179-48623227	protein_coding	0.415197	0.0761701	0.915197	0.57617	0.667588	Zfp775	0
ENSMUSG00000007279	ENSMUSG00000007279	Scube2	chr7:109798675-109865679	protein_coding	0	0	0.5	0.5	0	#N/A	0
ENSMUSG00000004364	ENSMUSG00000004364	Cul3	chr1:80264922-80340480	protein_coding	7.95534	0.160268	8.45534	0.660268	3.67874	Cul3	1
ENSMUSG00000007379	ENSMUSG00000007379	Dennd2c	chr3:103102603-103169769	protein_coding	0.198545	0.298603	0.698545	0.798603	-0.193125	#N/A	0
ENSMUSG00000007411	ENSMUSG00000007411	Mark3	chr12:111574509-111656227	protein_coding	3.27699	0.57442	3.77699	1.07442	1.81368	Mark3	0
ENSMUSG00000080426	ENSMUSG00000080426	Gm24834	chr15:68698200-68698288		5.90138	0	6.40138	0.5	3.67838	#N/A	1
ENSMUSG00000007440	ENSMUSG00000007440	Pcdhac1	chr18:36930284-37187657	protein_coding	0.0631025	0	0.563103	0.5	0.171469	#N/A	0
ENSMUSG00000007457	ENSMUSG00000007457	2310003L06Rik	chr5:87969458-87972870	protein_coding	0	0	0.5	0.5	0	#N/A	0
ENSMUSG00000067344	ENSMUSG00000067344	Rps25-ps1	chr6:145266326-145266825		11.2857	0.42136	11.7857	0.92136	3.67713	#N/A	1
ENSMUSG00000061353	ENSMUSG00000061353	Cxcl12	chr6:117168534-117181367	protein_coding	9.7092	0.298317	10.2092	0.798317	3.67676	Cxcl12	1
ENSMUSG00000026411	ENSMUSG00000026411	Tmem9	chr1:136008218-136035030	protein_coding	5.89031	0	6.39031	0.5	3.67589	Tmem9	1
ENSMUSG00000029322	ENSMUSG00000029322	Plac8	chr5:100553724-100572245	protein_coding	38.5503	2.55586	39.0503	3.05586	3.67568	Plac8	1
ENSMUSG00000007570	ENSMUSG00000007570	Fance	chr17:28313529-28326568	protein_coding	2.09634	3.21287	2.59634	3.71287	-0.516055	Fance	0
ENSMUSG00000007589	ENSMUSG00000007589	Tinf2	chr14:55679082-55681817	protein_coding	1.89656	1.22465	2.39656	1.72465	0.474661	Tinf2	0
ENSMUSG00000007591	ENSMUSG00000007591	Tssk4	chr14:55650181-55652539	protein_coding	0	0	0.5	0.5	0	#N/A	0
ENSMUSG00000007594	ENSMUSG00000007594	Hapln4	chr8:70083528-70090862	protein_coding	0.238267	0	0.738267	0.5	0.562215	#N/A	0
ENSMUSG00000007603	ENSMUSG00000007603	Dus3l	chr17:56764750-56770092	protein_coding	2.21426	2.46629	2.71426	2.96629	-0.128101	Dus3l	0
ENSMUSG00000007610	ENSMUSG00000007610	Gtpbp3	chr8:71488102-71499583	protein_coding	3.62846	2.02216	4.12846	2.52216	0.710944	Gtpbp3	0
ENSMUSG00000007613	ENSMUSG00000007613	Tgfbr1	chr4:47353221-47414931	protein_coding	3.62041	1.2175	4.12041	1.7175	1.26248	Tgfbr1	0
ENSMUSG00000007617	ENSMUSG00000007617	Homer1	chr13:93303756-93404129	protein_coding	1.81872	0.939461	2.31872	1.43946	0.6878	Homer1	0
ENSMUSG00000007646	ENSMUSG00000007646	Rad51c	chr11:87376644-87404954	protein_coding	0.146773	0.074397	0.646773	0.574397	0.171211	Rad51c	0
ENSMUSG00000007653	ENSMUSG00000007653	Gabrb2	chr11:42419756-42629028	protein_coding	0.0490786	0	0.549079	0.5	0.135085	#N/A	0
ENSMUSG00000038668	ENSMUSG00000038668	Lpar1	chr4:58435254-58553898	protein_coding	13.2712	0.579	13.7712	1.079	3.67389	Lpar1	1
ENSMUSG00000046275	ENSMUSG00000046275	Tusc5	chr11:76679807-76698664	protein_coding	25.8342	1.56755	26.3342	2.06755	3.67094	Tusc5	1
ENSMUSG00000032038	ENSMUSG00000032038	St3gal4	chr9:35046578-35116810	protein_coding	6.37368	0.0397836	6.87368	0.539784	3.67063	St3gal4	1
ENSMUSG00000093149	ENSMUSG00000093149	Gm23374	chr16:64918221-64918305		5.86642	0	6.36642	0.5	3.67048	#N/A	1
ENSMUSG00000007682	ENSMUSG00000007682	Dio2	chr12:90724553-90738438	protein_coding	0	0	0.5	0.5	0	Dio2	0
ENSMUSG00000093152	ENSMUSG00000093152	Gm25032	chr9:39075410-39075494		5.86642	0	6.36642	0.5	3.67048	#N/A	1
ENSMUSG00000081043	ENSMUSG00000081043	Gm11512	chr11:90538483-90539146		22.3819	1.299	22.8819	1.799	3.66894	#N/A	1
ENSMUSG00000020053	ENSMUSG00000020053	Igf1	chr10:87858264-87937042	protein_coding	8.60184	0.217184	9.10184	0.717184	3.66574	Igf1	1
ENSMUSG00000007783	ENSMUSG00000007783	Cpt1c	chr7:44959372-44974851	protein_coding	1.21103	0.792764	1.71103	1.29276	0.404406	Cpt1c	0
ENSMUSG00000050188	ENSMUSG00000050188	Lsm10	chr4:126096622-126098584	protein_coding	5.82583	0	6.32583	0.5	3.66125	Lsm10	1
ENSMUSG00000011884	ENSMUSG00000011884	Gltp	chr5:114669402-114690984	protein_coding	8.75888	0.232445	9.25888	0.732445	3.66005	Gltp	1
ENSMUSG00000059658	ENSMUSG00000059658	Gm16379	chr9:14845364-14845712		7.35641	0.121501	7.85641	0.621501	3.66004	#N/A	1
ENSMUSG00000021496	ENSMUSG00000021496	Pcbd2	chr13:55727367-55776830	protein_coding	10.5355	0.373287	11.0355	0.873287	3.65955	Pcbd2	1
ENSMUSG00000007827	ENSMUSG00000007827	Ankrd26	chr6:118502563-118562256	protein_coding	0.0905069	0.0674576	0.590507	0.567458	0.0574413	Ankrd26	0
ENSMUSG00000007833	ENSMUSG00000007833	Aldh16a1	chr7:45140683-45154584	protein_coding	3.38695	0.733061	3.88695	1.23306	1.65639	Aldh16a1	0
ENSMUSG00000008730	ENSMUSG00000008730	Hipk1	chr3:103739814-103791563	protein_coding	24.643	1.49166	25.143	1.99166	3.65811	Hipk1	1
ENSMUSG00000010914	ENSMUSG00000010914	Pdhx	chr2:103021074-103073513	protein_coding	74.3425	5.42871	74.8425	5.92871	3.65807	Pdhx	1
ENSMUSG00000000301	ENSMUSG00000000301	Pemt	chr11:59970613-60046489	protein_coding	5.79814	0	6.29814	0.5	3.65493	Pemt	1
ENSMUSG00000007867	ENSMUSG00000007867	Ift43	chr12:86082560-86162458	protein_coding	3.09034	0	3.59034	0.5	2.84412	Ift43	0
ENSMUSG00000069682	ENSMUSG00000069682	Gm10275	chr10:29698745-29699379	protein_coding	28.0741	1.77209	28.5741	2.27209	3.65262	#N/A	1
ENSMUSG00000007877	ENSMUSG00000007877	Tcap	chr11:98383810-98384953	protein_coding	0.234713	0	0.734713	0.5	0.555253	Tcap	0
ENSMUSG00000001323	ENSMUSG00000001323	Srr	chr11:74906358-74925948	protein_coding	7.45021	0.132415	7.95021	0.632415	3.65205	Srr	1
ENSMUSG00000007888	ENSMUSG00000007888	Crlf1	chr8:70493157-70504081	protein_coding	1.0161	0	1.5161	0.5	1.60036	Crlf1	0
ENSMUSG00000071757	ENSMUSG00000071757	Zhx2	chr15:57694664-57839833	protein_coding	6.23028	0.0354404	6.73028	0.53544	3.65187	Zhx2	1
ENSMUSG00000044533	ENSMUSG00000044533	Rps2	chr17:24718115-24721929	protein_coding	132.107	10.0567	132.607	10.5567	3.65093	Rps2	1
ENSMUSG00000007907	ENSMUSG00000007907	Cabs1	chr5:87979438-87981544	protein_coding	0	0	0.5	0.5	0	#N/A	0
ENSMUSG00000007908	ENSMUSG00000007908	Hmgcll1	chr9:76014854-76136350	protein_coding	0	0	0.5	0.5	0	#N/A	0
ENSMUSG00000007944	ENSMUSG00000007944	Ttc9b	chr7:27653914-27656208	protein_coding	0	0	0.5	0.5	0	#N/A	0
ENSMUSG00000007946	ENSMUSG00000007946	Phox2a	chr7:101818312-101823166	protein_coding	0	0	0.5	0.5	0	#N/A	0
ENSMUSG00000007950	ENSMUSG00000007950	Abhd8	chr8:71456699-71463657	protein_coding	1.3667	0.20367	1.8667	0.70367	1.40752	Abhd8	0
ENSMUSG00000007987	ENSMUSG00000007987	Rabl5	chr5:136908149-136913244	protein_coding	2.29633	0	2.79633	0.5	2.48353	Rabl5	0
ENSMUSG00000007989	ENSMUSG00000007989	Fzd3	chr14:65201025-65262463	protein_coding	0.858934	0	1.35893	0.5	1.44248	Fzd3	0
ENSMUSG00000008028	ENSMUSG00000008028	1700008O03Rik	chr7:44360042-44385820	protein_coding	0.0239515	0.0481883	0.523952	0.548188	-0.0652383	#N/A	0
ENSMUSG00000030735	ENSMUSG00000030735	Gm9755	chr8:67513999-67515606	protein_coding	27.0228	1.69134	27.5228	2.19134	3.65074	#N/A	1
ENSMUSG00000043192	ENSMUSG00000043192	Gm1840	chr8:5639583-5640996	protein_coding	36.1604	2.42241	36.6604	2.92241	3.64899	#N/A	1
ENSMUSG00000060681	ENSMUSG00000060681	Slc9a6	chrX:56609756-56664230	protein_coding	34.4296	2.28605	34.9296	2.78605	3.64816	Slc9a6	1
ENSMUSG00000008129	ENSMUSG00000008129	4930432K21Rik	chr8:84148024-84172590	protein_coding	0.0849271	0	0.584927	0.5	0.226329	#N/A	0
ENSMUSG00000008136	ENSMUSG00000008136	Fhl2	chr1:43123073-43163961	protein_coding	3.14735	0.422729	3.64735	0.922729	1.98287	Fhl2	0
ENSMUSG00000021607	ENSMUSG00000021607	Mrpl36	chr13:73331008-73332175	protein_coding	6.9985	0.0992646	7.4985	0.599265	3.64534	Mrpl36	1
ENSMUSG00000020925	ENSMUSG00000020925	Ccdc43	chr11:102684685-102697782	protein_coding	5.7278	0	6.2278	0.5	3.63872	Ccdc43	1
ENSMUSG00000008167	ENSMUSG00000008167	Fbxw9	chr8:85060054-85067124	protein_coding	2.40798	1.12576	2.90798	1.62576	0.838903	Fbxw9	0
ENSMUSG00000008193	ENSMUSG00000008193	Spib	chr7:44525994-44532071	protein_coding	0	0	0.5	0.5	0	#N/A	0
ENSMUSG00000008200	ENSMUSG00000008200	Fnbp4	chr2:90745369-90781021	protein_coding	1.65602	2.434	2.15602	2.934	-0.444498	Fnbp4	0
ENSMUSG00000039114	ENSMUSG00000039114	Nrn1	chr13:36725624-36734477	protein_coding	5.71479	0	6.21479	0.5	3.63571	Nrn1	1
ENSMUSG00000067870	ENSMUSG00000067870	Rpl31-ps8	chr15:90764245-90764679		12.2627	0.529325	12.7627	1.02933	3.63216	#N/A	1
ENSMUSG00000008301	ENSMUSG00000008301	Phax	chr18:56562442-56587712	protein_coding	3.09535	2.09841	3.59535	2.59841	0.468503	Phax	0
ENSMUSG00000050552	ENSMUSG00000050552	Lamtor4	chr5:138255607-138259398	protein_coding	19.8436	1.14103	20.3436	1.64103	3.6319	Lamtor4	1
ENSMUSG00000008307	ENSMUSG00000008307	1700109H08Rik	chr5:3571565-3584356	protein_coding	0	0	0.5	0.5	0	1700109H08Rik	0
ENSMUSG00000008318	ENSMUSG00000008318	Relt	chr7:100845847-100863446	protein_coding	0.652883	1.14851	1.15288	1.64851	-0.515917	Relt	0
ENSMUSG00000008333	ENSMUSG00000008333	Snrpb2	chr2:143063038-143072853	protein_coding	1.90392	0	2.40392	0.5	2.26539	Snrpb2	0
ENSMUSG00000030591	ENSMUSG00000030591	Psmd8	chr7:29174187-29180701	protein_coding	69.6076	5.17074	70.1076	5.67074	3.62796	Psmd8	1
ENSMUSG00000061100	ENSMUSG00000061100	Retnla	chr16:48842551-48844461	protein_coding	5.68067	0	6.18067	0.5	3.62776	Retnla	1
ENSMUSG00000008384	ENSMUSG00000008384	Sertad1	chr7:27486909-27490316	protein_coding	1.84839	0.481894	2.34839	0.981894	1.25803	Sertad1	0
ENSMUSG00000095677	ENSMUSG00000095677	Dynlt1f	chr17:6648940-6655939	protein_coding	13.193	0.608437	13.693	1.10844	3.62684	Dynlt1f	1
ENSMUSG00000008398	ENSMUSG00000008398	Elk3	chr10:93247413-93311135	protein_coding	1.1997	0.0553163	1.6997	0.555316	1.6139	Elk3	0
ENSMUSG00000046432	ENSMUSG00000046432	Ngfrap1	chrX:136270252-136271978	protein_coding	5.67011	0	6.17011	0.5	3.6253	Ngfrap1	1
ENSMUSG00000046580	ENSMUSG00000046580	Gm7862	chr12:76152335-76152627		14.8744	0.747463	15.3744	1.24746	3.62346	#N/A	1
ENSMUSG00000008438	ENSMUSG00000008438	Adam21	chr12:81558583-81568474	protein_coding	0.0227331	0	0.522733	0.5	0.0641464	#N/A	0
ENSMUSG00000093322	ENSMUSG00000093322	Gm24971	chr12:54666676-54666786		5.65287	0	6.15287	0.5	3.62126	#N/A	1
ENSMUSG00000008461	ENSMUSG00000008461	Fut1	chr7:45617605-45621059	protein_coding	0.0742691	0.00694235	0.574269	0.506942	0.179905	#N/A	0
ENSMUSG00000039196	ENSMUSG00000039196	Orm1	chr4:63344559-63348163	protein_coding	15.8671	0.831228	16.3671	1.33123	3.61997	Orm1	1
ENSMUSG00000008482	ENSMUSG00000008482	Rnf151	chr17:24715838-24718057	protein_coding	0	0	0.5	0.5	0	#N/A	0
ENSMUSG00000008489	ENSMUSG00000008489	Elavl2	chr4:91250762-91400785	protein_coding	0	0	0.5	0.5	0	#N/A	0
ENSMUSG00000008496	ENSMUSG00000008496	Pou2f2	chr7:25091908-25159922	protein_coding	0	0	0.5	0.5	0	#N/A	0
ENSMUSG00000029250	ENSMUSG00000029250	Polr2b	chr5:77310146-77349324	protein_coding	17.6069	0.97487	18.1069	1.47487	3.61788	Polr2b	1
ENSMUSG00000083087	ENSMUSG00000083087	Gm11249	chr4:67930880-67931739		6.45737	0.0672575	6.95737	0.567257	3.61647	#N/A	1
ENSMUSG00000008590	ENSMUSG00000008590	Htr3b	chr9:48935007-48964990	protein_coding	0	0	0.5	0.5	0	#N/A	0
ENSMUSG00000008601	ENSMUSG00000008601	Rab25	chr3:88542028-88548300	protein_coding	0	0	0.5	0.5	0	#N/A	0
ENSMUSG00000093065	ENSMUSG00000093065	Gm23154	chr4:87432271-87432336		1598.68	130.281	1599.18	130.781	3.61211	#N/A	1
ENSMUSG00000008658	ENSMUSG00000008658	Rbfox1	chr16:6809221-7412479	protein_coding	0	0	0.5	0.5	0	#N/A	0
ENSMUSG00000031820	ENSMUSG00000031820	Babam1	chr8:71396854-71404772	protein_coding	15.0741	0.776752	15.5741	1.27675	3.6086	Babam1	1
ENSMUSG00000053128	ENSMUSG00000053128	Rnf26	chr9:44066326-44113517	protein_coding	6.30543	0.0581332	6.80543	0.558133	3.608	Rnf26	1
ENSMUSG00000037720	ENSMUSG00000037720	Tmem33	chr5:67260564-67291461	protein_coding	25.4972	1.63315	25.9972	2.13315	3.6073	Tmem33	1
ENSMUSG00000081434	ENSMUSG00000081434	Gm14165	chr2:152353614-152354566		14.475	0.72971	14.975	1.22971	3.60617	#N/A	1
ENSMUSG00000029003	ENSMUSG00000029003	Mad2l2	chr4:148130383-148145699	protein_coding	5.58768	0	6.08768	0.5	3.60589	Mad2l2	1
ENSMUSG00000095597	ENSMUSG00000095597	Gm6472	chrX:152909503-152910155	protein_coding	25.0306	1.59741	25.5306	2.09741	3.60555	#N/A	1
ENSMUSG00000078592	ENSMUSG00000078592	Gm4609	chr3:122230194-122231196		20.1082	1.19714	20.6082	1.69714	3.60204	#N/A	1
ENSMUSG00000008789	ENSMUSG00000008789	Ceacam5	chr7:17713251-17761121	protein_coding	0	0	0.5	0.5	0	#N/A	0
ENSMUSG00000008813	ENSMUSG00000008813	Tppp2	chr14:51918424-51920699	protein_coding	0	0.155065	0.5	0.655065	-0.38971	#N/A	0
ENSMUSG00000008822	ENSMUSG00000008822	Acyp1	chr12:85272397-85288438	protein_coding	2.12175	0	2.62175	0.5	2.39053	Acyp1	0
ENSMUSG00000008843	ENSMUSG00000008843	Cldn13	chr5:134914248-134915526	protein_coding	0	0	0.5	0.5	0	#N/A	0
ENSMUSG00000008845	ENSMUSG00000008845	Cd163	chr6:124304650-124330527	protein_coding	0.00367842	0.00193851	0.503678	0.501939	0.00499228	Cd163	0
ENSMUSG00000057841	ENSMUSG00000057841	Rpl32	chr6:115805504-115808747	protein_coding	167.109	13.3046	167.609	13.8046	3.60188	Rpl32	1
ENSMUSG00000008859	ENSMUSG00000008859	Rala	chr13:17880574-17944239	protein_coding	2.72412	0.413387	3.22412	0.913387	1.81961	Rala	0
ENSMUSG00000008874	ENSMUSG00000008874	Clec3a	chr8:114418085-114425846	protein_coding	0	0	0.5	0.5	0	#N/A	0
ENSMUSG00000078139	ENSMUSG00000078139	AK157302	chr13:21495222-21497146	protein_coding	13.9965	0.695133	14.4965	1.19513	3.60046	#N/A	1
ENSMUSG00000008932	ENSMUSG00000008932	Slc1a7	chr4:107968331-108013532	protein_coding	0.00360834	0.0423056	0.503608	0.542306	-0.106804	#N/A	0
ENSMUSG00000095304	ENSMUSG00000095304	Plac9a	chr14:25888022-25902882	protein_coding	6.45911	0.0739009	6.95911	0.573901	3.60003	Plac9a	1
ENSMUSG00000029195	ENSMUSG00000029195	Klb	chr5:65348385-65384003	protein_coding	13.7741	0.677762	14.2741	1.17776	3.59928	Klb	1
ENSMUSG00000008999	ENSMUSG00000008999	Bmp7	chr2:172868011-172940321	protein_coding	0.0297326	0.191452	0.529733	0.691452	-0.384365	#N/A	0
ENSMUSG00000082884	ENSMUSG00000082884	Gm13339	chr2:22590023-22590533		6.78805	0.102193	7.28805	0.602193	3.59724	#N/A	1
ENSMUSG00000047547	ENSMUSG00000047547	Cltb	chr13:54592400-54611344	protein_coding	9.70885	0.346553	10.2088	0.846553	3.59208	Cltb	1
ENSMUSG00000089294	ENSMUSG00000089294	Mir2139	chr4:139967525-139967620		5.52887	0	6.02887	0.5	3.59189	#N/A	1
ENSMUSG00000009047	ENSMUSG00000009047	Gm5965	chr16:88777895-88778528	protein_coding	0	0	0.5	0.5	0	#N/A	0
ENSMUSG00000009070	ENSMUSG00000009070	Rtdr1	chr10:74957476-75032586	protein_coding	0.0397113	0	0.539711	0.5	0.11026	#N/A	0
ENSMUSG00000027996	ENSMUSG00000027996	Sfrp2	chr3:83766320-83774316	protein_coding	5.52078	0	6.02078	0.5	3.58995	Sfrp2	1
ENSMUSG00000009075	ENSMUSG00000009075	Cabp7	chr11:4736891-4746778	protein_coding	0.227908	0	0.727908	0.5	0.541828	#N/A	0
ENSMUSG00000009076	ENSMUSG00000009076	Zmat5	chr11:4704677-4737669	protein_coding	2.81799	0	3.31799	0.5	2.73031	Zmat5	0
ENSMUSG00000045055	ENSMUSG00000045055	Rpsa-ps2	chr10:128776741-128777251		37.3271	2.64194	37.8271	3.14194	3.58969	#N/A	1
ENSMUSG00000082419	ENSMUSG00000082419	Gm11425	chr11:83027499-83027997		10.3277	0.399906	10.8277	0.899906	3.58881	#N/A	1
ENSMUSG00000009092	ENSMUSG00000009092	Derl3	chr10:75893397-75895941	protein_coding	0	0	0.5	0.5	0	Derl3	0
ENSMUSG00000009093	ENSMUSG00000009093	Gstt4	chr10:75814942-75822543	protein_coding	0.0789967	0	0.578997	0.5	0.211627	#N/A	0
ENSMUSG00000009097	ENSMUSG00000009097	Tbx1	chr16:18581712-18586969	protein_coding	0.962992	0.826558	1.46299	1.32656	0.141234	#N/A	0
ENSMUSG00000009108	ENSMUSG00000009108	Gnat2	chr3:108092788-108101432	protein_coding	0.568119	0	1.06812	0.5	1.09507	#N/A	0
ENSMUSG00000015759	ENSMUSG00000015759	Cnih	chr14:46775581-46788411	protein_coding	21.8534	1.35931	22.3534	1.85931	3.58766	Cnih	1
ENSMUSG00000009114	ENSMUSG00000009114	2610028H24Rik	chr10:76449080-76461110	protein_coding	0.0635377	0	0.563538	0.5	0.172584	#N/A	0
ENSMUSG00000009115	ENSMUSG00000009115	Spatc1l	chr10:76562271-76570201	protein_coding	0	0.327327	0.5	0.827327	-0.72653	#N/A	0
ENSMUSG00000009145	ENSMUSG00000009145	Dqx1	chr6:83057843-83067210	protein_coding	0.127689	0.0324476	0.627689	0.532448	0.23741	#N/A	0
ENSMUSG00000009185	ENSMUSG00000009185	Ccl8	chr11:82115184-82116799	protein_coding	1.37105	0	1.87105	0.5	1.90385	Ccl8	0
ENSMUSG00000009207	ENSMUSG00000009207	Lnp	chr2:74520290-74579435	protein_coding	1.75819	0	2.25819	0.5	2.17517	Lnp	0
ENSMUSG00000009210	ENSMUSG00000009210	2310007L24Rik	chr11:106365473-106377114	protein_coding	0.100244	0	0.600244	0.5	0.263621	#N/A	0
ENSMUSG00000009214	ENSMUSG00000009214	Tmem8c	chr2:27061635-27072179	protein_coding	0	0	0.5	0.5	0	Tmem8c	0
ENSMUSG00000009216	ENSMUSG00000009216	Fam163b	chr2:27110379-27142491	protein_coding	0	0.133219	0.5	0.633219	-0.340776	#N/A	0
ENSMUSG00000009246	ENSMUSG00000009246	Trpm5	chr7:143069152-143094642	protein_coding	0	0	0.5	0.5	0	#N/A	0
ENSMUSG00000009248	ENSMUSG00000009248	Ascl2	chr7:142966821-142969264	protein_coding	0	0	0.5	0.5	0	#N/A	0
ENSMUSG00000080186	ENSMUSG00000080186	Gm14448	chrX:5885742-5885952		5.50859	0	6.00859	0.5	3.58703	#N/A	1
ENSMUSG00000027566	ENSMUSG00000027566	Psma7	chr2:180036372-180042433	protein_coding	35.4926	2.49567	35.9926	2.99567	3.58675	Psma7	1
ENSMUSG00000009292	ENSMUSG00000009292	Trpm2	chr10:77907721-77970563	protein_coding	0.17645	0.298899	0.67645	0.798899	-0.24003	#N/A	0
ENSMUSG00000006304	ENSMUSG00000006304	Arpc2	chr1:74236496-74268209	protein_coding	29.3998	1.98942	29.8998	2.48942	3.58625	Arpc2	1
ENSMUSG00000009350	ENSMUSG00000009350	Mpo	chr11:87793580-87804413	protein_coding	0.3888	1.20804	0.8888	1.70804	-0.942411	#N/A	0
ENSMUSG00000009356	ENSMUSG00000009356	Lpo	chr11:87806427-87828289	protein_coding	0	0	0.5	0.5	0	#N/A	0
ENSMUSG00000064267	ENSMUSG00000064267	Hvcn1	chr5:122206803-122242297	protein_coding	5.4975	0	5.9975	0.5	3.58436	Hvcn1	1
ENSMUSG00000009378	ENSMUSG00000009378	Slc16a12	chr19:34668402-34747289	protein_coding	0.466898	0.115191	0.966898	0.615191	0.652329	#N/A	0
ENSMUSG00000032011	ENSMUSG00000032011	Thy1	chr9:44043383-44048579	protein_coding	5.49558	0	5.99558	0.5	3.5839	Thy1	1
ENSMUSG00000009406	ENSMUSG00000009406	Elk1	chrX:20933394-20950608	protein_coding	3.8071	1.3331	4.3071	1.8331	1.23243	Elk1	0
ENSMUSG00000009418	ENSMUSG00000009418	Nav1	chr1:135434579-135585355	protein_coding	2.45221	0.54907	2.95221	1.04907	1.49268	Nav1	0
ENSMUSG00000004317	ENSMUSG00000004317	Clcn5	chrX:7153809-7319358	protein_coding	5.49016	0	5.99016	0.5	3.58259	Clcn5	1
ENSMUSG00000009471	ENSMUSG00000009471	Myod1	chr7:46376473-46379092	protein_coding	0.0367852	0	0.536785	0.5	0.102417	#N/A	0
ENSMUSG00000009487	ENSMUSG00000009487	Otog	chr7:46240986-46311434	protein_coding	0.00472041	0.00303132	0.50472	0.503031	0.0048362	#N/A	0
ENSMUSG00000009535	ENSMUSG00000009535	Rnmt	chr18:68300354-68324852	protein_coding	3.19598	1.90215	3.69598	2.40215	0.621631	Rnmt	0
ENSMUSG00000009545	ENSMUSG00000009545	Kcnq1	chr7:143107253-143427042	protein_coding	0	0	0.5	0.5	0	#N/A	0
ENSMUSG00000092828	ENSMUSG00000092828	Gm23160	chr17:70958038-70958121		2443.51	203.572	2444.01	204.072	3.5821	#N/A	1
ENSMUSG00000009551	ENSMUSG00000009551	6330409D20Rik	chr2:32732619-32741016	protein_coding	0	0	0.5	0.5	0	#N/A	0
ENSMUSG00000083454	ENSMUSG00000083454	Gm13226	chr4:145576888-145577292		22.1503	1.3915	22.6503	1.8915	3.58193	#N/A	1
ENSMUSG00000024772	ENSMUSG00000024772	Ehd1	chr19:6276724-6300096	protein_coding	129.512	10.361	130.012	10.861	3.58142	Ehd1	1
ENSMUSG00000009566	ENSMUSG00000009566	Fpgs	chr2:32682608-32704137	protein_coding	0.966244	2.08432	1.46624	2.58432	-0.81766	Fpgs	0
ENSMUSG00000009569	ENSMUSG00000009569	Mkl2	chr16:13256480-13417529	protein_coding	2.36553	0.173024	2.86553	0.673024	2.09007	#N/A	0
ENSMUSG00000092558	ENSMUSG00000092558	Med20	chr17:47611581-47624418	protein_coding	5.81494	0.028756	6.31494	0.528756	3.57809	Med20	1
ENSMUSG00000009580	ENSMUSG00000009580	Odam	chr5:87885028-87894174	protein_coding	0	0	0.5	0.5	0	#N/A	0
ENSMUSG00000071343	ENSMUSG00000071343	Gm10327	chr10:33808496-33809498		13.8589	0.704381	14.3589	1.20438	3.57558	#N/A	1
ENSMUSG00000009588	ENSMUSG00000009588	St6galnac1	chr11:116765024-116775507	protein_coding	0.004547	0.463693	0.504547	0.963693	-0.933585	#N/A	0
ENSMUSG00000009596	ENSMUSG00000009596	Taf7l	chrX:134460117-134476490	protein_coding	0	0	0.5	0.5	0	#N/A	0
ENSMUSG00000025492	ENSMUSG00000025492	Ifitm3	chr7:141009585-141010770	protein_coding	209.266	17.1148	209.766	17.6148	3.57392	Ifitm3	1
ENSMUSG00000009621	ENSMUSG00000009621	Vav2	chr2:27262103-27427033	protein_coding	2.20942	0.561444	2.70942	1.06144	1.35196	Vav2	0
ENSMUSG00000009628	ENSMUSG00000009628	Tex15	chr8:33516737-33585582	protein_coding	0.671568	0	1.17157	0.5	1.22844	#N/A	0
ENSMUSG00000080994	ENSMUSG00000080994	Gm13464	chr2:43518463-43519398		19.8358	1.20984	20.3358	1.70984	3.57209	#N/A	1
ENSMUSG00000084413	ENSMUSG00000084413	Gm12017	chr11:17973787-17974790		9.03273	0.30187	9.53273	0.80187	3.57145	#N/A	1
ENSMUSG00000009640	ENSMUSG00000009640	Dmap1	chr4:117674680-117682273	protein_coding	2.94615	3.44977	3.44615	3.94977	-0.196783	Dmap1	0
ENSMUSG00000009646	ENSMUSG00000009646	Pla2g12b	chr10:59403659-59421976	protein_coding	0	0	0.5	0.5	0	#N/A	0
ENSMUSG00000009647	ENSMUSG00000009647	Mcu	chr10:59446983-59616692	protein_coding	3.72302	0.65984	4.22302	1.15984	1.86435	Mcu	0
ENSMUSG00000009654	ENSMUSG00000009654	Oit3	chr10:59422957-59441778	protein_coding	0.0733414	0	0.573341	0.5	0.197466	#N/A	0
ENSMUSG00000009670	ENSMUSG00000009670	Tex11	chrX:100838647-101059667	protein_coding	0	0	0.5	0.5	0	#N/A	0
ENSMUSG00000009681	ENSMUSG00000009681	Bcr	chr10:75060895-75184923	protein_coding	2.0564	0.915238	2.5564	1.41524	0.853069	Bcr	0
ENSMUSG00000042190	ENSMUSG00000042190	Cmklr1	chr5:113612353-113650426	protein_coding	7.98967	0.21435	8.48967	0.71435	3.57101	Cmklr1	1
ENSMUSG00000009731	ENSMUSG00000009731	Kcnd1	chrX:7822288-7838280	protein_coding	0.389147	0.0499951	0.889147	0.549995	0.693003	#N/A	0
ENSMUSG00000009733	ENSMUSG00000009733	Tfcp2	chr15:100502798-100552008	protein_coding	0.897159	0.561044	1.39716	1.06104	0.397012	Tfcp2	0
ENSMUSG00000009734	ENSMUSG00000009734	Pou6f2	chr13:18121100-18382041	protein_coding	0	0	0.5	0.5	0	#N/A	0
ENSMUSG00000009739	ENSMUSG00000009739	Pou6f1	chr15:100575317-100599984	protein_coding	0.563804	1.12151	1.0638	1.62151	-0.608106	Pou6f1	0
ENSMUSG00000028234	ENSMUSG00000028234	Rps20	chr4:3831333-3835665	protein_coding	83.4009	6.56047	83.9009	7.06047	3.57085	Rps20	1
ENSMUSG00000009772	ENSMUSG00000009772	Nuak2	chr1:132316125-132333488	protein_coding	0.147405	0	0.647405	0.5	0.37274	#N/A	0
ENSMUSG00000009828	ENSMUSG00000009828	Ick	chr9:78109191-78172107	protein_coding	2.77249	0.730521	3.27249	1.23052	1.41112	Ick	0
ENSMUSG00000082561	ENSMUSG00000082561	Gm15580	chr7:143596438-143596994		5.44132	0	5.94132	0.5	3.57078	#N/A	1
ENSMUSG00000009876	ENSMUSG00000009876	Cox4i2	chr2:152754172-152765037	protein_coding	2.15792	0.771062	2.65792	1.27106	1.06426	Cox4i2	0
ENSMUSG00000018678	ENSMUSG00000018678	Sp2	chr11:96953339-96982959	protein_coding	5.43692	0	5.93692	0.5	3.56971	Sp2	1
ENSMUSG00000009900	ENSMUSG00000009900	Wnt3a	chr11:59248032-59290752	protein_coding	0	0	0.5	0.5	0	#N/A	0
ENSMUSG00000009905	ENSMUSG00000009905	Kdsr	chr1:106720409-106759742	protein_coding	0.933161	0.358648	1.43316	0.858648	0.739062	Kdsr	0
ENSMUSG00000046934	ENSMUSG00000046934	Csl	chr10:99757704-99759658	protein_coding	6.41769	0.0828627	6.91769	0.582863	3.56906	Csl	1
ENSMUSG00000025732	ENSMUSG00000025732	Fam195a	chr17:25863697-25868738	protein_coding	76.8506	6.02156	77.3506	6.52156	3.56812	Fam195a	1
ENSMUSG00000009941	ENSMUSG00000009941	Nxf2	chrX:134944525-134964754	protein_coding	0	0	0.5	0.5	0	#N/A	0
ENSMUSG00000036315	ENSMUSG00000036315	Znrd1	chr17:36954357-36958559	protein_coding	5.42459	0	5.92459	0.5	3.56672	Znrd1	1
ENSMUSG00000010021	ENSMUSG00000010021	Kif19a	chr11:114765387-114790739	protein_coding	0.0372377	0	0.537238	0.5	0.103632	#N/A	0
ENSMUSG00000040410	ENSMUSG00000040410	Fbxl4	chr4:22357542-22434091	protein_coding	9.12281	0.312235	9.62281	0.812235	3.56649	Fbxl4	1
ENSMUSG00000010044	ENSMUSG00000010044	Zmynd10	chr9:107547309-107551319	protein_coding	0	0.41944	0.5	0.91944	-0.878827	#N/A	0
ENSMUSG00000033809	ENSMUSG00000033809	Alg3	chr16:20605450-20610768	protein_coding	5.42319	0	5.92319	0.5	3.56637	Alg3	1
ENSMUSG00000059518	ENSMUSG00000059518	Znhit1	chr5:136982163-136988021	protein_coding	21.7755	1.38282	22.2755	1.88282	3.56449	Znhit1	1
ENSMUSG00000010048	ENSMUSG00000010048	Ifrd2	chr9:107587717-107593038	protein_coding	3.87146	0	4.37146	0.5	3.12812	Ifrd2	0
ENSMUSG00000010051	ENSMUSG00000010051	Hyal1	chr9:107576926-107581710	protein_coding	0.665038	5.08421e-13	1.16504	0.5	1.22038	Hyal1	0
ENSMUSG00000061979	ENSMUSG00000061979	Wbscr16	chr5:134148053-134176774	protein_coding	5.40678	0	5.90678	0.5	3.56237	Wbscr16	1
ENSMUSG00000010057	ENSMUSG00000010057	Nprl2	chr9:107542208-107545704	protein_coding	2.73282	0.228592	3.23282	0.728592	2.14961	Nprl2	0
ENSMUSG00000010064	ENSMUSG00000010064	Slc38a3	chr9:107650638-107668968	protein_coding	0	0	0.5	0.5	0	#N/A	0
ENSMUSG00000010066	ENSMUSG00000010066	Cacna2d2	chr9:107399611-107529346	protein_coding	0.035481	0.0223636	0.535481	0.522364	0.035781	#N/A	0
ENSMUSG00000010067	ENSMUSG00000010067	Rassf1	chr9:107551554-107562263	protein_coding	1.77831	0.397267	2.27831	0.897267	1.34435	Rassf1	0
ENSMUSG00000010080	ENSMUSG00000010080	Epn3	chr11:94489598-94499974	protein_coding	0.0971049	0	0.597105	0.5	0.256056	#N/A	0
ENSMUSG00000010086	ENSMUSG00000010086	Rnf112	chr11:61448441-61454131	protein_coding	0	0	0.5	0.5	0	#N/A	0
ENSMUSG00000055676	ENSMUSG00000055676	Gm5069	chr1:180326969-180330550	protein_coding	7.04076	0.138402	7.54076	0.638402	3.56217	#N/A	1
ENSMUSG00000021486	ENSMUSG00000021486	Prelid1	chr13:55322054-55325271	protein_coding	68.6502	5.36	69.1502	5.86	3.56076	Prelid1	1
ENSMUSG00000032388	ENSMUSG00000032388	Spg21	chr9:65460936-65488470	protein_coding	30.4136	2.12098	30.9136	2.62098	3.56006	Spg21	1
ENSMUSG00000010122	ENSMUSG00000010122	Slc47a1	chr11:61343400-61378345	protein_coding	0	0	0.5	0.5	0	#N/A	0
ENSMUSG00000010136	ENSMUSG00000010136	Pifo	chr3:105996956-106014646	protein_coding	0	0	0.5	0.5	0	#N/A	0
ENSMUSG00000010142	ENSMUSG00000010142	Tnfrsf13b	chr11:61126754-61149372	protein_coding	0	0	0.5	0.5	0	#N/A	0
ENSMUSG00000010175	ENSMUSG00000010175	Prox1	chr1:190118037-190170680	protein_coding	0.0237088	0	0.523709	0.5	0.0668368	#N/A	0
ENSMUSG00000021930	ENSMUSG00000021930	Spryd7	chr14:61531992-61556886	protein_coding	5.39605	0	5.89605	0.5	3.55975	Spryd7	1
ENSMUSG00000026893	ENSMUSG00000026893	Gca	chr2:62664284-62694109	protein_coding	9.19383	0.322614	9.69383	0.822614	3.55878	Gca	1
ENSMUSG00000010290	ENSMUSG00000010290	AI597479	chr1:43098709-43115947	protein_coding	1.46152	0.135798	1.96152	0.635798	1.62533	AI597479	0
ENSMUSG00000009563	ENSMUSG00000009563	Tor2a	chr2:32757233-32762244	protein_coding	8.83128	0.292059	9.33128	0.792059	3.5584	Tor2a	1
ENSMUSG00000010311	ENSMUSG00000010311	Optc	chr1:133897198-133907999	protein_coding	0.30326	0	0.80326	0.5	0.683939	#N/A	0
ENSMUSG00000010342	ENSMUSG00000010342	Tex14	chr11:87405064-87555823	protein_coding	0	0	0.5	0.5	0	#N/A	0
ENSMUSG00000082424	ENSMUSG00000082424	Gm13292	chr2:11409029-11410031		23.2746	1.51981	23.7746	2.01981	3.55713	#N/A	1
ENSMUSG00000010362	ENSMUSG00000010362	Rdm1	chr11:101627194-101636100	protein_coding	1.9728	0	2.4728	0.5	2.30615	Rdm1	0
ENSMUSG00000024990	ENSMUSG00000024990	Rbp4	chr19:38116619-38125321	protein_coding	96.3001	7.73242	96.8001	8.23242	3.55562	Rbp4	1
ENSMUSG00000003573	ENSMUSG00000003573	Homer3	chr8:70282826-70294361	protein_coding	5.376	0	5.876	0.5	3.55483	Homer3	1
ENSMUSG00000030753	ENSMUSG00000030753	Prkrir	chr7:98703102-98718062	protein_coding	26.954	1.83661	27.454	2.33661	3.55453	Prkrir	1
ENSMUSG00000010435	ENSMUSG00000010435	Spaca7	chr8:12573048-12600738	protein_coding	0	0	0.5	0.5	0	#N/A	0
ENSMUSG00000089659	ENSMUSG00000089659	Gm3470	chr5:99021739-99022440		5.37268	0	5.87268	0.5	3.55402	Gm3470	1
ENSMUSG00000010461	ENSMUSG00000010461	Eya4	chr10:23104167-23349895	protein_coding	0.0940516	0	0.594052	0.5	0.24866	#N/A	0
ENSMUSG00000010476	ENSMUSG00000010476	Ebf3	chr7:137193672-137314445	protein_coding	1.27882	0.795379	1.77882	1.29538	0.457546	Ebf3	0
ENSMUSG00000010492	ENSMUSG00000010492	Gm16119	chr2:181578479-181585170		0.0927777	0.80034	0.592778	1.30034	-1.13333	#N/A	0
ENSMUSG00000010505	ENSMUSG00000010505	Myt1	chr2:181763331-181827797	protein_coding	0	0	0.5	0.5	0	#N/A	0
ENSMUSG00000059173	ENSMUSG00000059173	Pde1a	chr2:79834452-80129458	protein_coding	5.94082	0.0486204	6.44082	0.54862	3.55336	Pde1a	1
ENSMUSG00000010529	ENSMUSG00000010529	Gm266	chr12:111484610-111485823	protein_coding	0	0	0.5	0.5	0	#N/A	0
ENSMUSG00000010538	ENSMUSG00000010538	Tsacc	chr3:88282756-88296999	protein_coding	0.373242	0	0.873242	0.5	0.804453	Tsacc	0
ENSMUSG00000010554	ENSMUSG00000010554	Mettl16	chr11:74770829-74828525	protein_coding	2.17203	0.464691	2.67203	0.964691	1.4698	Mettl16	0
ENSMUSG00000010592	ENSMUSG00000010592	Dazl	chr17:50279393-50293599	protein_coding	0	0	0.5	0.5	0	#N/A	0
ENSMUSG00000010601	ENSMUSG00000010601	Apol7a	chr15:77388220-77399110	protein_coding	0.0093467	0	0.509347	0.5	0.0267199	#N/A	0
ENSMUSG00000070896	ENSMUSG00000070896	Rpl23a-ps1	chr1:45981547-45982015	protein_coding	9.31863	0.336424	9.81863	0.836424	3.55322	#N/A	1
ENSMUSG00000083076	ENSMUSG00000083076	Gm11408	chr4:80003395-80003914		5.36729	0	5.86729	0.5	3.55269	#N/A	1
ENSMUSG00000010608	ENSMUSG00000010608	Rbm25	chr12:83632425-83633833	protein_coding	0.0497649	0	0.549765	0.5	0.136887	Rbm25	0
ENSMUSG00000005882	ENSMUSG00000005882	Uqcc	chr2:155846893-155930310	protein_coding	81.0379	6.44931	81.5379	6.94931	3.55253	Uqcc	1
ENSMUSG00000082743	ENSMUSG00000082743	Gm12988	chr4:135756217-135756695		5.36648	0	5.86648	0.5	3.5525	#N/A	1
ENSMUSG00000010660	ENSMUSG00000010660	Plcd1	chr9:119071526-119093496	protein_coding	1.15417	0.448743	1.65417	0.948743	0.802018	Plcd1	0
ENSMUSG00000022214	ENSMUSG00000022214	Dcaf11	chr14:55560005-55570065	protein_coding	72.0002	5.68805	72.5002	6.18805	3.55043	Dcaf11	1
ENSMUSG00000010721	ENSMUSG00000010721	Lmbr1	chr5:29229813-29378390	protein_coding	1.54146	0.0479519	2.04146	0.547952	1.89748	Lmbr1	0
ENSMUSG00000010751	ENSMUSG00000010751	Tnfrsf22	chr7:143634807-143649661	protein_coding	0.585408	1.78246	1.08541	2.28246	-1.07235	Tnfrsf22	0
ENSMUSG00000030208	ENSMUSG00000030208	Emp1	chr6:135362930-135383173	protein_coding	8.42007	0.261928	8.92007	0.761928	3.54933	Emp1	1
ENSMUSG00000010760	ENSMUSG00000010760	Phlda2	chr7:143501544-143502541	protein_coding	0	0	0.5	0.5	0	#N/A	0
ENSMUSG00000010796	ENSMUSG00000010796	Asz1	chr6:18050963-18109061	protein_coding	0	0	0.5	0.5	0	#N/A	0
ENSMUSG00000010797	ENSMUSG00000010797	Wnt2	chr6:17988939-18030585	protein_coding	0.039387	0	0.539387	0.5	0.109393	#N/A	0
ENSMUSG00000010803	ENSMUSG00000010803	Gabra1	chr11:42130938-42182930	protein_coding	0	0	0.5	0.5	0	#N/A	0
ENSMUSG00000010825	ENSMUSG00000010825	Grid2ip	chr5:143357337-143392152	protein_coding	0	0	0.5	0.5	0	#N/A	0
ENSMUSG00000010830	ENSMUSG00000010830	Kdelr3	chr15:79516407-79527739	protein_coding	3.86332	0.413257	4.36332	0.913257	2.25633	Kdelr3	0
ENSMUSG00000010841	ENSMUSG00000010841	1700006E09Rik	chr11:101984278-101992264	protein_coding	0	0	0.5	0.5	0	#N/A	0
ENSMUSG00000044751	ENSMUSG00000044751	Gm12231	chr11:55118100-55118795		47.4916	3.60302	47.9916	4.10302	3.54802	#N/A	1
ENSMUSG00000057666	ENSMUSG00000057666	Gapdh	chr6:125161714-125166467	protein_coding	506.373	42.8487	506.873	43.3487	3.54756	Gapdh	1
ENSMUSG00000040105	ENSMUSG00000040105	Ppapdc2	chr19:28963919-28966798	protein_coding	10.7866	0.466191	11.2866	0.966191	3.54616	Ppapdc2	1
ENSMUSG00000011008	ENSMUSG00000011008	Mcoln2	chr3:146149832-146195513	protein_coding	0.105896	0	0.605896	0.5	0.277142	#N/A	0
ENSMUSG00000011034	ENSMUSG00000011034	Slc5a1	chr5:33104218-33162872	protein_coding	0	0	0.5	0.5	0	#N/A	0
ENSMUSG00000011052	ENSMUSG00000011052	1700049J03Rik	chr17:26554253-26561496		0	0	0.5	0.5	0	#N/A	0
ENSMUSG00000022425	ENSMUSG00000022425	Enpp2	chr15:54838897-54920146	protein_coding	37.7052	2.77577	38.2052	3.27577	3.54386	Enpp2	1
ENSMUSG00000048175	ENSMUSG00000048175	Asb8	chr15:98134636-98165625	protein_coding	9.94611	0.396227	10.4461	0.896227	3.54296	Asb8	1
ENSMUSG00000011118	ENSMUSG00000011118	Panx3	chr9:37659901-37669222	protein_coding	0	0	0.5	0.5	0	#N/A	0
ENSMUSG00000011148	ENSMUSG00000011148	Adssl1	chr12:112620044-112641354	protein_coding	1.4904	3.32567	1.9904	3.82567	-0.942654	Adssl1	0
ENSMUSG00000011154	ENSMUSG00000011154	1700026D08Rik	chr7:83774100-83794880	protein_coding	0	0	0.5	0.5	0	#N/A	0
ENSMUSG00000011158	ENSMUSG00000011158	Brf1	chr12:112959861-113000621	protein_coding	2.57777	1.78095	3.07777	2.28095	0.432251	Brf1	0
ENSMUSG00000011171	ENSMUSG00000011171	Vipr2	chr12:116077725-116146261	protein_coding	0.109679	0.0408061	0.609679	0.540806	0.172938	#N/A	0
ENSMUSG00000028743	ENSMUSG00000028743	Akr7a5	chr4:139310743-139318426	protein_coding	11.4369	0.524277	11.9369	1.02428	3.54275	Akr7a5	1
ENSMUSG00000011254	ENSMUSG00000011254	Thg1l	chr11:45946842-45955494	protein_coding	2.9773	0.518551	3.4773	1.01855	1.77145	Thg1l	0
ENSMUSG00000011256	ENSMUSG00000011256	Adam19	chr11:46055991-46147343	protein_coding	2.26949	0.672975	2.76949	1.17298	1.23945	Adam19	0
ENSMUSG00000014867	ENSMUSG00000014867	Surf4	chr2:26920039-26933928	protein_coding	43.2723	3.25764	43.7723	3.75764	3.54212	Surf4	1
ENSMUSG00000011263	ENSMUSG00000011263	Exoc3l2	chr7:19489055-19496760	protein_coding	0	0	0.5	0.5	0	#N/A	0
ENSMUSG00000011267	ENSMUSG00000011267	Zfp296	chr7:19577286-19580656	protein_coding	0.317691	0.37869	0.817691	0.87869	-0.103799	Zfp296	0
ENSMUSG00000083846	ENSMUSG00000083846	Gm13797	chr2:95697916-95698036		5.3234	0	5.8234	0.5	3.54186	#N/A	1
ENSMUSG00000011306	ENSMUSG00000011306	Sugp1	chr8:70042812-70071953	protein_coding	3.52231	0.73491	4.02231	1.23491	1.70362	Sugp1	0
ENSMUSG00000011349	ENSMUSG00000011349	Dmrtc2	chr7:24870056-24877651	protein_coding	0.298521	0	0.798521	0.5	0.675402	#N/A	0
ENSMUSG00000011350	ENSMUSG00000011350	Gm5893	chr7:24818794-24840275		0	0	0.5	0.5	0	#N/A	0
ENSMUSG00000000439	ENSMUSG00000000439	Mkrn2	chr6:115601937-115618670	protein_coding	5.73205	0.0357801	6.23205	0.53578	3.53999	Mkrn2	1
ENSMUSG00000011427	ENSMUSG00000011427	Zfp790	chr7:29816071-29832042	protein_coding	0.666984	0	1.16698	0.5	1.22278	Zfp790	0
ENSMUSG00000011463	ENSMUSG00000011463	Cpb1	chr3:20248263-20275733	protein_coding	0.0285106	0.00418245	0.528511	0.504182	0.0679865	#N/A	0
ENSMUSG00000011486	ENSMUSG00000011486	Slc25a41	chr17:57032772-57041654	protein_coding	0	0	0.5	0.5	0	#N/A	0
ENSMUSG00000011589	ENSMUSG00000011589	Fsd1	chr17:55986510-55996881	protein_coding	0.117648	0	0.617648	0.5	0.304857	#N/A	0
ENSMUSG00000011632	ENSMUSG00000011632	Pinlyp	chr7:24541698-24546071	protein_coding	0	0	0.5	0.5	0	#N/A	0
ENSMUSG00000011658	ENSMUSG00000011658	Fuz	chr7:44896078-44902631	protein_coding	4.42711	4.18571	4.92711	4.68571	0.072474	Fuz	0
ENSMUSG00000011751	ENSMUSG00000011751	Sptbn4	chr7:27356382-27447686	protein_coding	0	0	0.5	0.5	0	#N/A	0
ENSMUSG00000031839	ENSMUSG00000031839	Hsbp1	chr8:119344537-119348927	protein_coding	22.408	1.47135	22.908	1.97135	3.5386	Hsbp1	1
ENSMUSG00000064363	ENSMUSG00000064363	mt-Nd4	chrM:10166-11544	protein_coding	259.461	21.8729	259.961	22.3729	3.53847	#N/A	1
ENSMUSG00000031897	ENSMUSG00000031897	Psmb10	chr8:105935727-105938392	protein_coding	5.30708	0	5.80708	0.5	3.53781	Psmb10	1
ENSMUSG00000011837	ENSMUSG00000011837	Snapc2	chr8:4253101-4256219	protein_coding	3.17041	0.60247	3.67041	1.10247	1.7352	Snapc2	0
ENSMUSG00000092762	ENSMUSG00000092762	Gm24209	chr19:45024612-45024678		12598.7	1086.01	12599.2	1086.51	3.53556	#N/A	1
ENSMUSG00000078606	ENSMUSG00000078606	Gm4070	chr7:105895138-105953967	protein_coding	7.4946	0.189434	7.9946	0.689434	3.53554	#N/A	1
ENSMUSG00000007891	ENSMUSG00000007891	Ctsd	chr7:142371147-142388038	protein_coding	474.76	40.4967	475.26	40.9967	3.53514	Ctsd	1
ENSMUSG00000031827	ENSMUSG00000031827	Cotl1	chr8:119809224-119840579	protein_coding	9.08386	0.326942	9.58386	0.826942	3.53475	Cotl1	1
ENSMUSG00000012017	ENSMUSG00000012017	Scarf2	chr16:17797281-17808287	protein_coding	1.01584	0.807524	1.51584	1.30752	0.21328	Scarf2	0
ENSMUSG00000012042	ENSMUSG00000012042	4930579F01Rik	chr3:138164134-138186713	protein_coding	0	0	0.5	0.5	0	#N/A	0
ENSMUSG00000012076	ENSMUSG00000012076	Brms1l	chr12:55836365-55869735	protein_coding	0.753168	0.0309657	1.25317	0.530966	1.23889	Brms1l	0
ENSMUSG00000068823	ENSMUSG00000068823	Csde1	chr3:103020545-103058189	protein_coding	38.9322	2.90274	39.4322	3.40274	3.53461	Csde1	1
ENSMUSG00000012117	ENSMUSG00000012117	Dhdds	chr4:133969027-134000918	protein_coding	3.90071	0.232202	4.40071	0.732202	2.58742	Dhdds	0
ENSMUSG00000012123	ENSMUSG00000012123	Aim1l	chr4:134065911-134092504	protein_coding	0.207354	0.174703	0.707354	0.674703	0.0681798	#N/A	0
ENSMUSG00000012126	ENSMUSG00000012126	Ubxn11	chr4:134102569-134127593	protein_coding	0.827502	3.64426	1.3275	4.14426	-1.6424	#N/A	0
ENSMUSG00000012187	ENSMUSG00000012187	Mogat1	chr1:78510990-78538173	protein_coding	0.500758	0	1.00076	0.5	1.00109	Mogat1	0
ENSMUSG00000012211	ENSMUSG00000012211	Tex22	chr12:113074501-113088917	protein_coding	0	0	0.5	0.5	0	#N/A	0
ENSMUSG00000012282	ENSMUSG00000012282	Wnt8a	chr18:34542312-34548273	protein_coding	0	0	0.5	0.5	0	#N/A	0
ENSMUSG00000012296	ENSMUSG00000012296	Tjap1	chr17:46257850-46283026	protein_coding	4.00229	1.19557	4.50229	1.69557	1.40889	Tjap1	0
ENSMUSG00000012350	ENSMUSG00000012350	Ehf	chr2:103263432-103303278	protein_coding	0.0723111	0.0696846	0.572311	0.569685	0.00663618	#N/A	0
ENSMUSG00000012396	ENSMUSG00000012396	Nanog	chr6:122707488-122714633	protein_coding	0.13857	0.0326256	0.63857	0.532626	0.261723	#N/A	0
ENSMUSG00000036775	ENSMUSG00000036775	Decr2	chr17:26081210-26090329	protein_coding	11.634	0.548785	12.134	1.04879	3.53226	Decr2	1
ENSMUSG00000012422	ENSMUSG00000012422	Tmem167	chr13:90089122-90143907	protein_coding	2.65695	0.322037	3.15695	0.822037	1.94126	Tmem167	0
ENSMUSG00000027792	ENSMUSG00000027792	Bche	chr3:73635807-73708415	protein_coding	7.12464	0.159125	7.62464	0.659125	3.53205	Bche	1
ENSMUSG00000012429	ENSMUSG00000012429	Mplkip	chr13:17695412-17699105	protein_coding	0.562222	0.274427	1.06222	0.774427	0.455884	Mplkip	0
ENSMUSG00000012443	ENSMUSG00000012443	Kif11	chr19:37376402-37421859	protein_coding	0.152042	0.0176496	0.652042	0.51765	0.332989	#N/A	0
ENSMUSG00000012483	ENSMUSG00000012483	Rpa3	chr6:8255935-8259173	protein_coding	3.52787	0	4.02787	0.5	3.01002	Rpa3	0
ENSMUSG00000012519	ENSMUSG00000012519	Mlkl	chr8:111311796-111338177	protein_coding	4.19245	1.06426	4.69245	1.56426	1.58486	Mlkl	0
ENSMUSG00000012520	ENSMUSG00000012520	Phox2b	chr5:67094396-67099301	protein_coding	0	0	0.5	0.5	0	#N/A	0
ENSMUSG00000025979	ENSMUSG00000025979	Mob4	chr1:55131230-55154899	protein_coding	5.42759	0.0125179	5.92759	0.512518	3.53177	Mob4	1
ENSMUSG00000012609	ENSMUSG00000012609	Ttll5	chr12:85824658-86061893	protein_coding	1.55769	1.90719	2.05769	2.40719	-0.226324	Ttll5	0
ENSMUSG00000061983	ENSMUSG00000061983	Rps12	chr10:23785210-23787195	protein_coding	164.596	13.779	165.096	14.279	3.53134	Rps12	1
ENSMUSG00000020814	ENSMUSG00000020814	Mxra7	chr11:116803061-116828046	protein_coding	6.86398	0.137862	7.36398	0.637862	3.52917	Mxra7	1
ENSMUSG00000012777	ENSMUSG00000012777	Acpt	chr7:44252147-44257378	protein_coding	0	0.301948	0.5	0.801948	-0.681581	#N/A	0
ENSMUSG00000012819	ENSMUSG00000012819	Cdh23	chr10:60302747-60696490	protein_coding	0.0177732	0.622706	0.517773	1.12271	-1.11659	#N/A	0
ENSMUSG00000038366	ENSMUSG00000038366	Lasp1	chr11:97798999-97838764	protein_coding	41.5512	3.14363	42.0512	3.64363	3.5287	Lasp1	1
ENSMUSG00000012889	ENSMUSG00000012889	Podnl1	chr8:84125988-84132527	protein_coding	0.0438811	0.0385362	0.543881	0.538536	0.014248	#N/A	0
ENSMUSG00000013033	ENSMUSG00000013033	Lphn1	chr8:83900104-83941954	protein_coding	2.39711	2.86099	2.89711	3.36099	-0.214272	Lphn1	0
ENSMUSG00000069188	ENSMUSG00000069188	Gm13192	chr2:4959542-4959752		8.32617	0.264883	8.82617	0.764883	3.52848	#N/A	1
ENSMUSG00000013083	ENSMUSG00000013083	2200002J24Rik	chr7:30699782-30700380	protein_coding	0	0	0.5	0.5	0	#N/A	0
ENSMUSG00000013089	ENSMUSG00000013089	Etv5	chr16:22381308-22439719	protein_coding	3.52519	4.10784	4.02519	4.60784	-0.195034	Etv5	0
ENSMUSG00000013091	ENSMUSG00000013091	Tmem190	chr7:4782939-4784341	protein_coding	0	0	0.5	0.5	0	#N/A	0
ENSMUSG00000066270	ENSMUSG00000066270	Gm10157	chr9:118837612-118837955		21.9314	1.44582	22.4314	1.94582	3.52707	#N/A	1
ENSMUSG00000013155	ENSMUSG00000013155	Enkd1	chr8:105703654-105707933	protein_coding	0.948004	0.132927	1.448	0.632927	1.19395	Enkd1	0
ENSMUSG00000013158	ENSMUSG00000013158	4933405L10Rik	chr8:105708290-105710244	protein_coding	0	0	0.5	0.5	0	#N/A	0
ENSMUSG00000095937	ENSMUSG00000095937	Gm12671	chr4:91851667-91852669		26.3989	1.83531	26.8989	2.33531	3.52586	#N/A	1
ENSMUSG00000006315	ENSMUSG00000006315	Tmem147	chr7:30727700-30729534	protein_coding	44.5709	3.41584	45.0709	3.91584	3.5248	Tmem147	1
ENSMUSG00000013275	ENSMUSG00000013275	Slc41a1	chr1:131827492-131848865	protein_coding	2.43156	0.115325	2.93156	0.615325	2.25225	Slc41a1	0
ENSMUSG00000013338	ENSMUSG00000013338	Fer1l4	chr2:156019138-156052947	protein_coding	0	0	0.5	0.5	0	#N/A	0
ENSMUSG00000013353	ENSMUSG00000013353	4931406B18Rik	chr7:43492043-43505940	protein_coding	0.0633953	0.159504	0.563395	0.659504	-0.227234	#N/A	0
ENSMUSG00000013367	ENSMUSG00000013367	Iglon5	chr7:43472906-43490075	protein_coding	0.877045	0.0854563	1.37704	0.585456	1.23394	#N/A	0
ENSMUSG00000013415	ENSMUSG00000013415	Igf2bp1	chr11:95957162-96005940	protein_coding	0.115985	0.631201	0.615985	1.1312	-0.876888	Igf2bp1	0
ENSMUSG00000013418	ENSMUSG00000013418	B4galnt2	chr11:95865942-95914891	protein_coding	0.119587	0	0.619587	0.5	0.309379	#N/A	0
ENSMUSG00000013419	ENSMUSG00000013419	Zfp651	chr9:121760032-121771742	protein_coding	1.56521	0.120815	2.06521	0.620815	1.73405	Zfp651	0
ENSMUSG00000083676	ENSMUSG00000083676	Gm11367	chr13:30112473-30112596		5.2459	0	5.7459	0.5	3.52253	#N/A	1
ENSMUSG00000013483	ENSMUSG00000013483	Card14	chr11:119307767-119345375	protein_coding	0.142853	0.125128	0.642853	0.625128	0.0403373	#N/A	0
ENSMUSG00000013495	ENSMUSG00000013495	Tmem175	chr5:108629769-108647770	protein_coding	2.33024	0.493844	2.83024	0.993844	1.50983	Tmem175	0
ENSMUSG00000013523	ENSMUSG00000013523	Bcas1	chr2:170346990-170427845	protein_coding	0.41827	0.314285	0.91827	0.814285	0.173385	#N/A	0
ENSMUSG00000032353	ENSMUSG00000032353	Tmed3	chr9:89699202-89705043	protein_coding	13.2736	0.698902	13.7736	1.1989	3.52212	Tmed3	1
ENSMUSG00000013562	ENSMUSG00000013562	4833413E03Rik	chr17:31557125-31559113	protein_coding	0	0	0.5	0.5	0	#N/A	0
ENSMUSG00000013584	ENSMUSG00000013584	Aldh1a2	chr9:71215788-71296243	protein_coding	0.029671	0	0.529671	0.5	0.0831684	#N/A	0
ENSMUSG00000024942	ENSMUSG00000024942	Capn1	chr19:5988545-6015825	protein_coding	10.8782	0.490708	11.3782	0.990708	3.52167	Capn1	1
ENSMUSG00000013611	ENSMUSG00000013611	Snx31	chr15:36504061-36555573	protein_coding	0	0	0.5	0.5	0	#N/A	0
ENSMUSG00000042043	ENSMUSG00000042043	Tbca	chr13:94788942-94842899	protein_coding	14.8042	0.833389	15.3042	1.33339	3.52076	Tbca	1
ENSMUSG00000082481	ENSMUSG00000082481	Rps12-ps19	chr11:75070813-75071213		5.71465	0.0416202	6.21465	0.54162	3.52032	#N/A	1
ENSMUSG00000013643	ENSMUSG00000013643	Lypd8	chr11:58379042-58390728	protein_coding	0	0	0.5	0.5	0	#N/A	0
ENSMUSG00000023806	ENSMUSG00000023806	Rsph3b	chr17:6904715-6948356	protein_coding	7.84501	0.22954	8.34501	0.72954	3.51585	Rsph3b	1
ENSMUSG00000013653	ENSMUSG00000013653	1810065E05Rik	chr11:58421110-58426024	protein_coding	0	0	0.5	0.5	0	#N/A	0
ENSMUSG00000013662	ENSMUSG00000013662	Atad1	chr19:32672562-32712298	protein_coding	3.74728	0.899229	4.24728	1.39923	1.60191	Atad1	0
ENSMUSG00000055172	ENSMUSG00000055172	C1ra	chr6:124512631-124523440	protein_coding	12.1124	0.604149	12.6124	1.10415	3.51384	C1ra	1
ENSMUSG00000013668	ENSMUSG00000013668	4933402N03Rik	chr7:131137712-131146314	protein_coding	0	0	0.5	0.5	0	#N/A	0
ENSMUSG00000013698	ENSMUSG00000013698	Pea15a	chr1:172196727-172206804	protein_coding	3.95863	0.689931	4.45863	1.18993	1.90572	Pea15a	0
ENSMUSG00000060733	ENSMUSG00000060733	Ipmk	chr10:71347762-71433327	protein_coding	5.20309	0	5.70309	0.5	3.51174	Ipmk	1
ENSMUSG00000013707	ENSMUSG00000013707	Tnfaip8l2	chr3:95139520-95142360	protein_coding	0.0643179	0	0.564318	0.5	0.17458	#N/A	0
ENSMUSG00000013736	ENSMUSG00000013736	Trnt1	chr6:106769119-106782474	protein_coding	3.33451	1.61389	3.83451	2.11389	0.859142	Trnt1	0
ENSMUSG00000013766	ENSMUSG00000013766	Ly6g6e	chr17:35076901-35078804	protein_coding	0	0	0.5	0.5	0	#N/A	0
ENSMUSG00000060450	ENSMUSG00000060450	Rnf14	chr18:38296634-38317847	protein_coding	10.2385	0.441773	10.7385	0.941773	3.51127	Rnf14	1
ENSMUSG00000082329	ENSMUSG00000082329	Gm14287	chr2:157528868-157528985		75.416	6.15836	75.916	6.65836	3.51117	#N/A	1
ENSMUSG00000024072	ENSMUSG00000024072	Yipf4	chr17:74489492-74500277	protein_coding	7.7798	0.226225	8.2798	0.726225	3.51111	Yipf4	1
ENSMUSG00000038803	ENSMUSG00000038803	Ost4	chr5:30905884-30907788	protein_coding	31.4335	2.30223	31.9335	2.80223	3.51042	Ost4	1
ENSMUSG00000028756	ENSMUSG00000028756	Pink1	chr4:138313408-138326307	protein_coding	15.1557	0.87446	15.6557	1.37446	3.50975	Pink1	1
ENSMUSG00000013878	ENSMUSG00000013878	Rnf170	chr8:26119367-26143871	protein_coding	2.66007	1.05336	3.16007	1.55336	1.02456	Rnf170	0
ENSMUSG00000075010	ENSMUSG00000075010	AW112010	chr19:11047612-11050566	protein_coding	5.19203	0	5.69203	0.5	3.50894	#N/A	1
ENSMUSG00000013928	ENSMUSG00000013928	Thap8	chr7:30280093-30290237	protein_coding	0.241934	0	0.741934	0.5	0.569363	#N/A	0
ENSMUSG00000013936	ENSMUSG00000013936	Myl2	chr5:122100950-122113472	protein_coding	0	0	0.5	0.5	0	#N/A	0
ENSMUSG00000013973	ENSMUSG00000013973	Dedd	chr1:171329144-171342331	protein_coding	3.57291	0.12661	4.07291	0.62661	2.70042	Dedd	0
ENSMUSG00000013974	ENSMUSG00000013974	1810033B17Rik	chr8:3665761-3668905	protein_coding	0	0.0758738	0.5	0.575874	-0.203825	#N/A	0
ENSMUSG00000023909	ENSMUSG00000023909	Paqr4	chr17:23736185-23740330	protein_coding	7.71973	0.22217	8.21973	0.72217	3.50868	Paqr4	1
ENSMUSG00000014030	ENSMUSG00000014030	Pax5	chr4:44531144-44711446	protein_coding	0.0156567	1.05417	0.515657	1.55417	-1.59166	#N/A	0
ENSMUSG00000014039	ENSMUSG00000014039	Prdm15	chr16:97791466-97851850	protein_coding	0.699389	0.578127	1.19939	1.07813	0.153773	Prdm15	0
ENSMUSG00000014074	ENSMUSG00000014074	Rnf168	chr16:32277458-32301434	protein_coding	0.684213	0.118477	1.18421	0.618477	0.937137	Rnf168	0
ENSMUSG00000014075	ENSMUSG00000014075	Tctex1d2	chr16:32419701-32429099	protein_coding	0.237615	0	0.737615	0.5	0.56094	Tctex1d2	0
ENSMUSG00000060002	ENSMUSG00000060002	Chpt1	chr10:88452744-88504073	protein_coding	227.05	19.5035	227.55	20.0035	3.50786	Chpt1	1
ENSMUSG00000014104	ENSMUSG00000014104	Sval2	chr6:41852988-41864413	protein_coding	0	0	0.5	0.5	0	#N/A	0
ENSMUSG00000014158	ENSMUSG00000014158	Trpv4	chr5:114622151-114658421	protein_coding	0.0858695	0	0.58587	0.5	0.228651	#N/A	0
ENSMUSG00000014164	ENSMUSG00000014164	Klhl3	chr13:58004220-58113592	protein_coding	0.15732	0.0074705	0.65732	0.507471	0.373272	#N/A	0
ENSMUSG00000026827	ENSMUSG00000026827	Gpd2	chr2:57237634-57370719	protein_coding	20.85	1.37761	21.35	1.87761	3.50727	Gpd2	1
ENSMUSG00000045962	ENSMUSG00000045962	Wnk1	chr6:119923968-120038672	protein_coding	17.815	1.11089	18.315	1.61089	3.5071	Wnk1	1
ENSMUSG00000014198	ENSMUSG00000014198	Zfp385c	chr11:100627542-100692455	protein_coding	0.345604	0.0486276	0.845604	0.548628	0.624155	#N/A	0
ENSMUSG00000014226	ENSMUSG00000014226	Cacybp	chr1:160202366-160212892	protein_coding	3.11162	0.760968	3.61162	1.26097	1.51811	Cacybp	0
ENSMUSG00000014232	ENSMUSG00000014232	Cluap1	chr16:3908800-3941147	protein_coding	0.732911	2.89804	1.23291	3.39804	-1.46263	Cluap1	0
ENSMUSG00000014243	ENSMUSG00000014243	Zswim7	chr11:62267223-62281375	protein_coding	1.60468	0	2.10468	0.5	2.0736	Zswim7	0
ENSMUSG00000014245	ENSMUSG00000014245	Pigl	chr11:62458459-62514417	protein_coding	2.95331	0.385219	3.45331	0.885219	1.96387	Pigl	0
ENSMUSG00000096145	ENSMUSG00000096145	Vkorc1	chr7:127893066-127895617	protein_coding	13.0526	0.692177	13.5526	1.19218	3.5069	Vkorc1	1
ENSMUSG00000045664	ENSMUSG00000045664	Cdc42ep2	chr19:5917555-5924816	protein_coding	5.18352	0	5.68352	0.5	3.50678	Cdc42ep2	1
ENSMUSG00000014303	ENSMUSG00000014303	Glis2	chr16:4594712-4624924	protein_coding	1.57258	0.466953	2.07258	0.966953	1.09991	Glis2	0
ENSMUSG00000089976	ENSMUSG00000089976	Gm2389	chr1:85061153-85062642		5.17773	0	5.67773	0.5	3.50531	#N/A	1
ENSMUSG00000049940	ENSMUSG00000049940	Pgrmc2	chr3:41066325-41083046	protein_coding	45.943	3.59027	46.443	4.09027	3.50519	Pgrmc2	1
ENSMUSG00000014349	ENSMUSG00000014349	Ube2z	chr11:96047431-96065388	protein_coding	4.35892	0.545089	4.85892	1.04509	2.21701	Ube2z	0
ENSMUSG00000014351	ENSMUSG00000014351	Gip	chr11:96024544-96030831	protein_coding	0	0	0.5	0.5	0	#N/A	0
ENSMUSG00000032437	ENSMUSG00000032437	Stt3b	chr9:115242606-115310421	protein_coding	82.5137	6.81394	83.0137	7.31394	3.50463	Stt3b	1
ENSMUSG00000022151	ENSMUSG00000022151	Ttc33	chr15:5185524-5218336	protein_coding	5.17276	0	5.67276	0.5	3.50405	Ttc33	1
ENSMUSG00000014361	ENSMUSG00000014361	Mertk	chr2:128698955-128802894	protein_coding	1.96664	0.252557	2.46664	0.752557	1.71267	Mertk	0
ENSMUSG00000013150	ENSMUSG00000013150	Gfod2	chr8:105713853-105758664	protein_coding	5.25161	0.00772436	5.75161	0.507724	3.50185	Gfod2	1
ENSMUSG00000026626	ENSMUSG00000026626	Ppp2r5a	chr1:191351980-191397041	protein_coding	55.6905	4.46625	56.1905	4.96625	3.5001	Ppp2r5a	1
ENSMUSG00000014426	ENSMUSG00000014426	Map3k4	chr17:12227620-12318660	protein_coding	1.65757	0.0872064	2.15757	0.587206	1.87747	Map3k4	0
ENSMUSG00000014453	ENSMUSG00000014453	Blk	chr14:63372836-63417187	protein_coding	0	0	0.5	0.5	0	#N/A	0
ENSMUSG00000014496	ENSMUSG00000014496	Ankrd28	chr14:31700014-31830415	protein_coding	0.853542	0.0295032	1.35354	0.529503	1.35403	Ankrd28	0
ENSMUSG00000090319	ENSMUSG00000090319	Gm4462	chr16:20664115-20664607		24.5794	1.71912	25.0794	2.21912	3.49844	#N/A	1
ENSMUSG00000014503	ENSMUSG00000014503	Pkd2l2	chr18:34409422-34442789	protein_coding	0.411333	0	0.911333	0.5	0.86605	#N/A	0
ENSMUSG00000064326	ENSMUSG00000064326	Siva1	chr12:112644827-112649152	protein_coding	10.8561	0.507059	11.3561	1.00706	3.49525	Siva1	1
ENSMUSG00000014529	ENSMUSG00000014529	4930511M11Rik	chr5:3657003-3680325	protein_coding	0	0.260364	0.5	0.760364	-0.604762	#N/A	0
ENSMUSG00000014542	ENSMUSG00000014542	Clec4f	chr6:83644541-83656187	protein_coding	0	0	0.5	0.5	0	#N/A	0
ENSMUSG00000014543	ENSMUSG00000014543	Klra17	chr6:129831153-129876672	protein_coding	0	0	0.5	0.5	0	#N/A	0
ENSMUSG00000005873	ENSMUSG00000005873	Reep5	chr18:34344888-34373415	protein_coding	35.843	2.72734	36.343	3.22734	3.49326	Reep5	1
ENSMUSG00000014550	ENSMUSG00000014550	Zfyve20	chr6:92186711-92214925	protein_coding	3.34092	2.98344	3.84092	3.48344	0.140939	Zfyve20	0
ENSMUSG00000027479	ENSMUSG00000027479	Mapre1	chr2:153741273-153773310	protein_coding	6.74966	0.144287	7.24966	0.644287	3.49214	Mapre1	1
ENSMUSG00000014554	ENSMUSG00000014554	Dguok	chr6:83480216-83506969	protein_coding	4.21653	2.54989	4.71653	3.04989	0.628969	Dguok	0
ENSMUSG00000014592	ENSMUSG00000014592	Camta1	chr4:150917321-151861876	protein_coding	1.60685	0.192566	2.10685	0.692566	1.60506	Camta1	0
ENSMUSG00000029613	ENSMUSG00000029613	Eif2ak1	chr5:143817787-143904256	protein_coding	5.1173	0	5.6173	0.5	3.48988	Eif2ak1	1
ENSMUSG00000030162	ENSMUSG00000030162	Olr1	chr6:129485245-129507165	protein_coding	10.6575	0.493696	11.1575	0.993696	3.48907	Olr1	1
ENSMUSG00000014602	ENSMUSG00000014602	Kif1a	chr1:93015455-93101865	protein_coding	0.299742	0.0128801	0.799742	0.51288	0.640913	Kif1a	0
ENSMUSG00000014603	ENSMUSG00000014603	Alx3	chr3:107595030-107605769	protein_coding	0	0	0.5	0.5	0	#N/A	0
ENSMUSG00000070953	ENSMUSG00000070953	Rabepk	chr2:34777555-34799912	protein_coding	14.1931	0.811075	14.6931	1.31107	3.48632	Rabepk	1
ENSMUSG00000014609	ENSMUSG00000014609	Chrne	chr11:70614882-70619216	protein_coding	0.0434445	0.0517876	0.543444	0.551788	-0.0219803	#N/A	0
ENSMUSG00000044792	ENSMUSG00000044792	Isca1	chr13:59755408-59769810	protein_coding	37.7303	2.91163	38.2303	3.41163	3.48618	Isca1	1
ENSMUSG00000014668	ENSMUSG00000014668	Chfr	chr5:110135839-110171972	protein_coding	3.47497	0.769017	3.97497	1.26902	1.64723	Chfr	0
ENSMUSG00000014686	ENSMUSG00000014686	Ceacam16	chr7:19852096-19861299	protein_coding	0	0	0.5	0.5	0	#N/A	0
ENSMUSG00000014704	ENSMUSG00000014704	Hoxa2	chr6:52162350-52165413	protein_coding	0.0828028	0.361989	0.582803	0.861989	-0.564662	Hoxa2	0
ENSMUSG00000014725	ENSMUSG00000014725	Adam28	chr14:68606026-68655842	protein_coding	0.0196502	0.0370256	0.51965	0.537026	-0.0474501	#N/A	0
ENSMUSG00000014747	ENSMUSG00000014747	Ankrd53	chr6:83762643-83768326	protein_coding	0.118312	0	0.618312	0.5	0.306407	#N/A	0
ENSMUSG00000027342	ENSMUSG00000027342	Pcna	chr2:132249161-132253314	protein_coding	5.10291	0	5.60291	0.5	3.48618	Pcna	1
ENSMUSG00000014763	ENSMUSG00000014763	Fam120b	chr17:15396245-15433580	protein_coding	2.02772	0.222938	2.52772	0.722938	1.80589	Fam120b	0
ENSMUSG00000066487	ENSMUSG00000066487	Gm5786	chr12:59081018-59081900	protein_coding	17.2209	1.08165	17.7209	1.58165	3.48595	#N/A	1
ENSMUSG00000024538	ENSMUSG00000024538	Ppic	chr18:53406340-53418007	protein_coding	27.1	1.96948	27.6	2.46948	3.48239	Ppic	1
ENSMUSG00000032601	ENSMUSG00000032601	Prkar2a	chr9:108692142-108749512	protein_coding	8.7324	0.327211	9.2324	0.827211	3.48038	Prkar2a	1
ENSMUSG00000014773	ENSMUSG00000014773	Dll1	chr17:15367353-15376872	protein_coding	0	0	0.5	0.5	0	#N/A	0
ENSMUSG00000014776	ENSMUSG00000014776	Nol3	chr8:105276446-105281939	protein_coding	0.61802	0.0136645	1.11802	0.513664	1.12205	Nol3	0
ENSMUSG00000014778	ENSMUSG00000014778	Fhod1	chr8:105329162-105347953	protein_coding	1.14924	1.5735	1.64924	2.0735	-0.330267	Fhod1	0
ENSMUSG00000014782	ENSMUSG00000014782	Plekhg4	chr8:105373273-105382862	protein_coding	0	0	0.5	0.5	0	#N/A	0
ENSMUSG00000014786	ENSMUSG00000014786	Slc9a5	chr8:105348257-105369881	protein_coding	0.0247744	0.0590877	0.524774	0.559088	-0.0913773	#N/A	0
ENSMUSG00000014791	ENSMUSG00000014791	Elmo3	chr8:105305600-105310623	protein_coding	0.237286	0.82308	0.737286	1.32308	-0.843604	Elmo3	0
ENSMUSG00000014813	ENSMUSG00000014813	Stc1	chr14:69029288-69041401	protein_coding	0.0524332	0	0.552433	0.5	0.143872	Stc1	0
ENSMUSG00000014837	ENSMUSG00000014837	4931428F04Rik	chr8:105280409-105289528	protein_coding	0.259448	0.0317652	0.759448	0.531765	0.514162	4931428F04Rik	0
ENSMUSG00000014846	ENSMUSG00000014846	Tppp3	chr8:105467492-105471526	protein_coding	0.435613	0	0.935613	0.5	0.903984	Tppp3	0
ENSMUSG00000014850	ENSMUSG00000014850	Msh3	chr13:92211880-92355003	protein_coding	0.728152	0.0986687	1.22815	0.598669	1.03666	Msh3	0
ENSMUSG00000014852	ENSMUSG00000014852	Adamts13	chr2:26973415-27009628	protein_coding	0.259807	0.0439759	0.759807	0.543976	0.48209	#N/A	0
ENSMUSG00000026249	ENSMUSG00000026249	Serpine2	chr1:79794196-79858696	protein_coding	11.1434	0.544486	11.6434	1.04449	3.47865	Serpine2	1
ENSMUSG00000054766	ENSMUSG00000054766	Set	chr2:30057377-30072577	protein_coding	19.2716	1.27474	19.7716	1.77474	3.47775	Set	1
ENSMUSG00000064350	ENSMUSG00000064350	mt-Ty	chrM:5259-5326		2747.52	246.177	2748.02	246.677	3.4777	#N/A	1
ENSMUSG00000074506	ENSMUSG00000074506	Gm10705	chr3:87207540-87208005		11.9134	0.615338	12.4134	1.11534	3.47635	Gm10705	1
ENSMUSG00000027010	ENSMUSG00000027010	Slc25a12	chr2:71271062-71367749	protein_coding	6.86762	0.164966	7.36762	0.664966	3.46985	Slc25a12	1
ENSMUSG00000014907	ENSMUSG00000014907	Naf1	chr8:66860216-66890564	protein_coding	1.79027	0.184476	2.29027	0.684476	1.74245	Naf1	0
ENSMUSG00000014932	ENSMUSG00000014932	Yes1	chr5:32611170-32687066	protein_coding	1.00859	0.173798	1.50859	0.673798	1.16281	Yes1	0
ENSMUSG00000026810	ENSMUSG00000026810	Dpm2	chr2:32570857-32573579	protein_coding	6.18463	0.103366	6.68463	0.603366	3.46974	Dpm2	1
ENSMUSG00000018001	ENSMUSG00000018001	Cyth3	chr5:143622446-143710250	protein_coding	24.0387	1.71501	24.5387	2.21501	3.46967	Cyth3	1
ENSMUSG00000014980	ENSMUSG00000014980	Tsen15	chr1:152370734-152386688	protein_coding	2.478	1.70667	2.978	2.20667	0.432473	Tsen15	0
ENSMUSG00000015001	ENSMUSG00000015001	Oc90	chr15:65876052-65912397	protein_coding	0	0	0.5	0.5	0	#N/A	0
ENSMUSG00000054455	ENSMUSG00000054455	Vapb	chr2:173737510-173784336	protein_coding	22.6133	1.58637	23.1133	2.08637	3.46966	Vapb	1
ENSMUSG00000034994	ENSMUSG00000034994	Eef2	chr10:81176630-81182507	protein_coding	452.809	40.4216	453.309	40.9216	3.46956	Eef2	1
ENSMUSG00000015053	ENSMUSG00000015053	Gata2	chr6:88193890-88207030	protein_coding	0.147307	0	0.647307	0.5	0.372522	#N/A	0
ENSMUSG00000015083	ENSMUSG00000015083	C8g	chr2:25498650-25501719	protein_coding	1.49344	0	1.99344	0.5	1.99526	C8g	0
ENSMUSG00000015085	ENSMUSG00000015085	Entpd2	chr2:25395873-25401321	protein_coding	3.97553	2.81823	4.47553	3.31823	0.431645	Entpd2	0
ENSMUSG00000009585	ENSMUSG00000009585	Apobec3	chr15:79891658-79915906	protein_coding	9.22163	0.377766	9.72163	0.877766	3.46929	Apobec3	1
ENSMUSG00000015090	ENSMUSG00000015090	Ptgds	chr2:25466708-25470046	protein_coding	0.125552	0	0.625552	0.5	0.323202	#N/A	0
ENSMUSG00000030612	ENSMUSG00000030612	Mrpl46	chr7:78775235-78783531	protein_coding	7.6108	0.232561	8.1108	0.732561	3.46882	Mrpl46	1
ENSMUSG00000015093	ENSMUSG00000015093	Clic3	chr2:25456837-25458776	protein_coding	0.28041	2.17857	0.78041	2.67857	-1.77916	#N/A	0
ENSMUSG00000082895	ENSMUSG00000082895	Rpsa-ps9	chr2:28477165-28478050		14.0386	0.813439	14.5386	1.31344	3.46847	#N/A	1
ENSMUSG00000045128	ENSMUSG00000045128	Rpl18a	chr8:70894721-70897443	protein_coding	154.72	13.5283	155.22	14.0283	3.4679	Rpl18a	1
ENSMUSG00000015112	ENSMUSG00000015112	Slc25a13	chr6:6041217-6217118	protein_coding	0.0915026	0	0.591503	0.5	0.242456	#N/A	0
ENSMUSG00000004945	ENSMUSG00000004945	Tmem242	chr17:5410863-5440260	protein_coding	15.0602	0.906307	15.5602	1.40631	3.46788	Tmem242	1
ENSMUSG00000015126	ENSMUSG00000015126	Tsr3	chr17:25240169-25242798	protein_coding	2.82103	1.7168	3.32103	2.2168	0.583152	Tsr3	0
ENSMUSG00000015127	ENSMUSG00000015127	Unkl	chr17:25188396-25234443	protein_coding	1.79942	0.329849	2.29942	0.829849	1.47035	Unkl	0
ENSMUSG00000015133	ENSMUSG00000015133	Lrrk1	chr7:66226911-66388350	protein_coding	3.15279	1.10086	3.65279	1.60086	1.19015	Lrrk1	0
ENSMUSG00000015134	ENSMUSG00000015134	Aldh1a3	chr7:66390891-66427517	protein_coding	0.162291	0.123395	0.662291	0.623395	0.0873187	#N/A	0
ENSMUSG00000015143	ENSMUSG00000015143	Actn1	chr12:80167541-80260371	protein_coding	3.26618	1.01368	3.76618	1.51368	1.31504	Actn1	0
ENSMUSG00000001418	ENSMUSG00000001418	0610031J06Rik	chr3:88325022-88331313	protein_coding	42.4322	3.38483	42.9322	3.88483	3.46614	0610031J06Rik	1
ENSMUSG00000002981	ENSMUSG00000002981	Clptm1	chr7:19631580-19665030	protein_coding	38.2843	3.01088	38.7843	3.51088	3.46557	Clptm1	1
ENSMUSG00000015176	ENSMUSG00000015176	Nolc1	chr19:46075862-46085528	protein_coding	1.82038	0.687739	2.32038	1.18774	0.966143	Nolc1	0
ENSMUSG00000015189	ENSMUSG00000015189	Casd1	chr6:4600839-4643381	protein_coding	1.64381	0.351417	2.14381	0.851417	1.33224	Casd1	0
ENSMUSG00000015202	ENSMUSG00000015202	Cnksr3	chr10:7119062-7212237	protein_coding	3.92307	1.31708	4.42307	1.81708	1.28343	Cnksr3	0
ENSMUSG00000059810	ENSMUSG00000059810	Rgs3	chr4:62559846-62703018	protein_coding	14.0461	0.817512	14.5461	1.31751	3.46474	#N/A	1
ENSMUSG00000021959	ENSMUSG00000021959	Lats2	chr14:57642076-57758388	protein_coding	5.65919	0.0583414	6.15919	0.558341	3.46352	Lats2	1
ENSMUSG00000015222	ENSMUSG00000015222	Map2	chr1:66175272-66442583	protein_coding	0	0	0.5	0.5	0	#N/A	0
ENSMUSG00000015224	ENSMUSG00000015224	Cyp2j9	chr4:96568428-96591578	protein_coding	1.59077	0.752695	2.09077	1.2527	0.738999	Cyp2j9	0
ENSMUSG00000015242	ENSMUSG00000015242	Nipsnap3a	chr4:52989271-53001162	protein_coding	0	0	0.5	0.5	0	#N/A	0
ENSMUSG00000094247	ENSMUSG00000094247	Gm23968	chr2:160624467-160624592		5.00973	0	5.50973	0.5	3.46198	#N/A	1
ENSMUSG00000015247	ENSMUSG00000015247	Nipsnap3b	chr4:53011879-53022060	protein_coding	3.26653	3.40632	3.76653	3.90632	-0.0525741	Nipsnap3b	0
ENSMUSG00000030747	ENSMUSG00000030747	Dgat2	chr7:99153662-99182713	protein_coding	141.478	12.3865	141.978	12.8865	3.46174	Dgat2	1
ENSMUSG00000031298	ENSMUSG00000031298	Gpr64	chrX:160390689-160498070	protein_coding	7.96535	0.269253	8.46535	0.769253	3.46004	Gpr64	1
ENSMUSG00000020022	ENSMUSG00000020022	Ndufa12	chr10:94198954-94221443	protein_coding	136.64	11.9702	137.14	12.4702	3.45909	Ndufa12	1
ENSMUSG00000037058	ENSMUSG00000037058	Paip2	chr18:35598616-35617186	protein_coding	30.2152	2.29574	30.7152	2.79574	3.45765	Paip2	1
ENSMUSG00000015312	ENSMUSG00000015312	Gadd45b	chr10:80930090-80932204	protein_coding	1.17733	0	1.67733	0.5	1.74617	Gadd45b	0
ENSMUSG00000015314	ENSMUSG00000015314	Slamf6	chr1:171917536-171943868	protein_coding	0	0	0.5	0.5	0	#N/A	0
ENSMUSG00000015316	ENSMUSG00000015316	Slamf1	chr1:171767126-171801184	protein_coding	0	0	0.5	0.5	0	#N/A	0
ENSMUSG00000015335	ENSMUSG00000015335	Zdhhc12	chr2:30090943-30093648	protein_coding	2.26583	1.281	2.76583	1.781	0.635025	Zdhhc12	0
ENSMUSG00000024667	ENSMUSG00000024667	Tmem216	chr19:10533864-10556238	protein_coding	4.98537	0	5.48537	0.5	3.45559	Tmem216	1
ENSMUSG00000015340	ENSMUSG00000015340	Cybb	chrX:9435251-9487771	protein_coding	0.187147	0	0.687147	0.5	0.458691	#N/A	0
ENSMUSG00000039886	ENSMUSG00000039886	Tmem120a	chr5:135735484-135744271	protein_coding	250.599	22.4079	251.099	22.9079	3.45434	Tmem120a	1
ENSMUSG00000015342	ENSMUSG00000015342	Xk	chrX:9272755-9313250	protein_coding	0.163915	0.125982	0.663915	0.625982	0.0848774	#N/A	0
ENSMUSG00000015354	ENSMUSG00000015354	Pcolce2	chr9:95637600-95698096	protein_coding	0.645738	0.722314	1.14574	1.22231	-0.0933378	Pcolce2	0
ENSMUSG00000015355	ENSMUSG00000015355	Cd48	chr1:171682008-171705258	protein_coding	0	0	0.5	0.5	0	#N/A	0
ENSMUSG00000022351	ENSMUSG00000022351	Sqle	chr15:59315076-59331192	protein_coding	7.17934	0.200844	7.67934	0.700844	3.45382	Sqle	1
ENSMUSG00000014599	ENSMUSG00000014599	Csf1	chr3:107741047-107760469	protein_coding	19.9159	1.3638	20.4159	1.8638	3.45337	Csf1	1
ENSMUSG00000015365	ENSMUSG00000015365	Mov10l1	chr15:88982908-89055152	protein_coding	0	0	0.5	0.5	0	#N/A	0
ENSMUSG00000015377	ENSMUSG00000015377	Dennd6b	chr15:89182216-89196474	protein_coding	0.295978	0.0504214	0.795978	0.550421	0.532192	Dennd6b	0
ENSMUSG00000015396	ENSMUSG00000015396	Cd83	chr13:43785106-43803130	protein_coding	0	0	0.5	0.5	0	#N/A	0
ENSMUSG00000015401	ENSMUSG00000015401	Tmem27	chrX:164088829-164118860	protein_coding	0	0	0.5	0.5	0	#N/A	0
ENSMUSG00000015405	ENSMUSG00000015405	Ace2	chrX:164139331-164188420	protein_coding	0	0	0.5	0.5	0	#N/A	0
ENSMUSG00000015437	ENSMUSG00000015437	Gzmb	chr14:56258855-56262260	protein_coding	0	0	0.5	0.5	0	#N/A	0
ENSMUSG00000015441	ENSMUSG00000015441	Gzmf	chr14:56205265-56211407	protein_coding	0	0	0.5	0.5	0	#N/A	0
ENSMUSG00000015443	ENSMUSG00000015443	Gzmn	chr14:56165796-56174596	protein_coding	0	0	0.5	0.5	0	#N/A	0
ENSMUSG00000037563	ENSMUSG00000037563	Rps16	chr7:28350651-28352696	protein_coding	90.334	7.79659	90.834	8.29659	3.45264	Rps16	1
ENSMUSG00000015452	ENSMUSG00000015452	Ager	chr17:34597861-34600934	protein_coding	0.170919	1.29597	0.670919	1.79597	-1.42055	Ager	0
ENSMUSG00000054200	ENSMUSG00000054200	Ffar4	chr19:38097078-38114263	protein_coding	10.8783	0.540259	11.3783	1.04026	3.45127	Ffar4	1
ENSMUSG00000015467	ENSMUSG00000015467	Egfl8	chr17:34613348-34615971	protein_coding	1.20962	0.73068	1.70962	1.23068	0.47422	#N/A	0
ENSMUSG00000015468	ENSMUSG00000015468	Notch4	chr17:34564267-34588503	protein_coding	1.26025	1.70928	1.76025	2.20928	-0.327796	#N/A	0
ENSMUSG00000030750	ENSMUSG00000030750	Nsmce1	chr7:125467639-125491596	protein_coding	4.96263	0	5.46263	0.5	3.4496	Nsmce1	1
ENSMUSG00000015476	ENSMUSG00000015476	Prrt1	chr17:34629532-34633126	protein_coding	0.781268	0.937702	1.28127	1.4377	-0.166192	#N/A	0
ENSMUSG00000025202	ENSMUSG00000025202	Scd3	chr19:44203287-44244016	protein_coding	64.5771	5.47357	65.0771	5.97357	3.44548	Scd3	1
ENSMUSG00000015484	ENSMUSG00000015484	Fam163a	chr1:156075965-156205026	protein_coding	0.0168278	0	0.516828	0.5	0.0477556	#N/A	0
ENSMUSG00000015488	ENSMUSG00000015488	Cacfd1	chr2:27009925-27021089	protein_coding	4.44369	1.05054	4.94369	1.55054	1.67282	Cacfd1	0
ENSMUSG00000015501	ENSMUSG00000015501	Hivep2	chr10:13966378-14151376	protein_coding	1.05905	0.140336	1.55905	0.640336	1.28377	Hivep2	0
ENSMUSG00000015519	ENSMUSG00000015519	2310057J18Rik	chr10:28972287-28986303	protein_coding	0	0	0.5	0.5	0	#N/A	0
ENSMUSG00000031068	ENSMUSG00000031068	Glrx3	chr7:137437647-137468594	protein_coding	34.1853	2.68689	34.6853	3.18689	3.4441	Glrx3	1
ENSMUSG00000015533	ENSMUSG00000015533	Itga2	chr13:114835915-114932041	protein_coding	0	0	0.5	0.5	0	#N/A	0
ENSMUSG00000021124	ENSMUSG00000021124	Vti1b	chr12:79156016-79172667	protein_coding	26.7646	2.00539	27.2646	2.50539	3.44392	Vti1b	1
ENSMUSG00000089698	ENSMUSG00000089698	Gm2541	chr16:85553232-85553943		4.94057	0	5.44057	0.5	3.44376	#N/A	1
ENSMUSG00000098187	ENSMUSG00000098187	RP23-369P2.1	chr6:22703435-22704416		5.13308	0.0179098	5.63308	0.51791	3.44315	#N/A	1
ENSMUSG00000059248	ENSMUSG00000059248	Sept9	chr11:117199660-117362325	protein_coding	97.4622	8.50811	97.9622	9.00811	3.44293	#N/A	1
ENSMUSG00000015579	ENSMUSG00000015579	Nkx2-5	chr17:26838663-26841565	protein_coding	0	0	0.5	0.5	0	#N/A	0
ENSMUSG00000015597	ENSMUSG00000015597	Zfp318	chr17:46383730-46420920	protein_coding	1.02717	0.151418	1.52717	0.651418	1.22921	Zfp318	0
ENSMUSG00000015599	ENSMUSG00000015599	Ttbk1	chr17:46442447-46487675	protein_coding	0.00230749	0	0.502307	0.5	0.00664269	#N/A	0
ENSMUSG00000015605	ENSMUSG00000015605	Srf	chr17:46546838-46556162	protein_coding	4.17331	1.50055	4.67331	2.00055	1.22405	Srf	0
ENSMUSG00000015619	ENSMUSG00000015619	Gata3	chr2:9857077-9890034	protein_coding	0	0	0.5	0.5	0	#N/A	0
ENSMUSG00000015627	ENSMUSG00000015627	Gata5	chr2:180325132-180334699	protein_coding	0	0	0.5	0.5	0	#N/A	0
ENSMUSG00000015647	ENSMUSG00000015647	Lama5	chr2:180176372-180225859	protein_coding	0.111886	0.140109	0.611886	0.640109	-0.0650547	#N/A	0
ENSMUSG00000015652	ENSMUSG00000015652	Steap1	chr5:5736316-5749326	protein_coding	0.69506	0.207096	1.19506	0.707096	0.757105	Steap1	0
ENSMUSG00000015653	ENSMUSG00000015653	Steap2	chr5:5664830-5694578	protein_coding	2.24548	0.0837296	2.74548	0.58373	2.23369	Steap2	0
ENSMUSG00000026932	ENSMUSG00000026932	Nacc2	chr2:26055534-26123220	protein_coding	8.90884	0.365829	9.40884	0.865829	3.44186	Nacc2	1
ENSMUSG00000015659	ENSMUSG00000015659	Serac1	chr17:6042195-6079741	protein_coding	1.26741	0.539921	1.76741	1.03992	0.765163	Serac1	0
ENSMUSG00000015665	ENSMUSG00000015665	Awat1	chrX:100572250-100578205	protein_coding	0.302903	0	0.802903	0.5	0.683298	#N/A	0
ENSMUSG00000050912	ENSMUSG00000050912	Tmem123	chr9:7764040-7794333	protein_coding	14.7054	0.899964	15.2054	1.39996	3.44112	Tmem123	1
ENSMUSG00000031021	ENSMUSG00000031021	Tmem9b	chr7:109735833-109752875	protein_coding	8.0451	0.28858	8.5451	0.78858	3.43777	Tmem9b	1
ENSMUSG00000081456	ENSMUSG00000081456	Gm7781	chrX:130524636-130525424		4.91799	0	5.41799	0.5	3.43776	#N/A	1
ENSMUSG00000015697	ENSMUSG00000015697	Setdb1	chr3:95323524-95357202	protein_coding	2.5607	0.333882	3.0607	0.833882	1.87595	Setdb1	0
ENSMUSG00000015702	ENSMUSG00000015702	Anxa9	chr3:95296095-95307176	protein_coding	0.814609	0	1.31461	0.5	1.39463	Anxa9	0
ENSMUSG00000015709	ENSMUSG00000015709	Arnt2	chr7:84246280-84409959	protein_coding	0.0645814	0	0.564581	0.5	0.175254	#N/A	0
ENSMUSG00000022312	ENSMUSG00000022312	Eif3h	chr15:51786557-51865481	protein_coding	44.4687	3.65047	44.9687	4.15047	3.43757	Eif3h	1
ENSMUSG00000021519	ENSMUSG00000021519	Mterfd1	chr13:66906967-66933088	protein_coding	8.88296	0.366092	9.38296	0.866092	3.43745	Mterfd1	1
ENSMUSG00000015721	ENSMUSG00000015721	Nlrp5	chr7:23385888-23441922	protein_coding	0.0564085	0	0.556408	0.5	0.154216	#N/A	0
ENSMUSG00000015023	ENSMUSG00000015023	Ddx19a	chr8:110974995-110997800	protein_coding	18.5951	1.26404	19.0951	1.76404	3.43625	Ddx19a	1
ENSMUSG00000015745	ENSMUSG00000015745	Plekho1	chr3:95988428-95996001	protein_coding	3.09874	1.691	3.59874	2.191	0.715902	Plekho1	0
ENSMUSG00000015747	ENSMUSG00000015747	Vps45	chr3:95999831-96058466	protein_coding	3.00131	0.571599	3.50131	1.0716	1.70813	Vps45	0
ENSMUSG00000015748	ENSMUSG00000015748	Prpf3	chr3:95830123-95855885	protein_coding	2.87605	1.83587	3.37605	2.33587	0.531376	Prpf3	0
ENSMUSG00000084104	ENSMUSG00000084104	Gm13578	chr2:64867998-64868588		6.7228	0.167888	7.2228	0.667888	3.43488	#N/A	1
ENSMUSG00000028837	ENSMUSG00000028837	Psmb2	chr4:126677629-126709714	protein_coding	34.3112	2.72513	34.8112	3.22513	3.43212	Psmb2	1
ENSMUSG00000024187	ENSMUSG00000024187	Itfg3	chr17:26211821-26244223	protein_coding	31.8887	2.50406	32.3887	3.00406	3.43051	Itfg3	1
ENSMUSG00000015757	ENSMUSG00000015757	Ppil4	chr10:7792890-7823135	protein_coding	1.46952	2.4749	1.96952	2.9749	-0.594997	Ppil4	0
ENSMUSG00000062014	ENSMUSG00000062014	Gmfb	chr14:46808148-46822242	protein_coding	8.27941	0.316527	8.77941	0.816527	3.42655	Gmfb	1
ENSMUSG00000015766	ENSMUSG00000015766	Eps8	chr6:137477244-137654876	protein_coding	1.7662	0.844001	2.2662	1.344	0.753741	Eps8	0
ENSMUSG00000032060	ENSMUSG00000032060	Cryab	chr9:50752757-50756633	protein_coding	11.8434	0.648125	12.3434	1.14812	3.42639	Cryab	1
ENSMUSG00000015787	ENSMUSG00000015787	Abo	chr2:26842502-26864979	protein_coding	0	0	0.5	0.5	0	#N/A	0
ENSMUSG00000021773	ENSMUSG00000021773	Comtd1	chr14:21845860-21848977	protein_coding	4.86788	0	5.36788	0.5	3.42435	Comtd1	1
ENSMUSG00000044285	ENSMUSG00000044285	Gm1821	chr14:46084125-46084815		291.475	26.7129	291.975	27.2129	3.42348	#N/A	1
ENSMUSG00000082536	ENSMUSG00000082536	Gm13456	chr2:40555751-40557116		101.829	9.04181	102.329	9.54181	3.42281	#N/A	1
ENSMUSG00000015812	ENSMUSG00000015812	Gnrh1	chr14:67745228-67749435	protein_coding	0.166839	0	0.666839	0.5	0.41541	#N/A	0
ENSMUSG00000015829	ENSMUSG00000015829	Tnr	chr1:159737509-159924397	protein_coding	0	0	0.5	0.5	0	#N/A	0
ENSMUSG00000024785	ENSMUSG00000024785	Rcl1	chr19:29101374-29143843	protein_coding	13.5739	0.81361	14.0739	1.31361	3.42141	Rcl1	1
ENSMUSG00000046727	ENSMUSG00000046727	Cystm1	chr18:36345618-36402980	protein_coding	4.85688	0	5.35688	0.5	3.42139	Cystm1	1
ENSMUSG00000023031	ENSMUSG00000023031	Cela1	chr15:100674424-100687920	protein_coding	4.85383	0	5.35383	0.5	3.42057	Cela1	1
ENSMUSG00000078300	ENSMUSG00000078300	Gm2606	chr15:12574888-12575890		22.774	1.67598	23.274	2.17598	3.41898	#N/A	1
ENSMUSG00000015850	ENSMUSG00000015850	Adamtsl4	chr3:95676200-95687917	protein_coding	1.52834	0.997653	2.02834	1.49765	0.437596	Adamtsl4	0
ENSMUSG00000015852	ENSMUSG00000015852	Fcrls	chr3:87250757-87263738	protein_coding	0.0886367	0	0.588637	0.5	0.235449	#N/A	0
ENSMUSG00000015854	ENSMUSG00000015854	Cd5l	chr3:87357880-87371074	protein_coding	0.0996871	0	0.599687	0.5	0.262282	#N/A	0
ENSMUSG00000026219	ENSMUSG00000026219	Trip12	chr1:84721188-84839304	protein_coding	11.0848	0.585085	11.5848	1.08508	3.41635	Trip12	1
ENSMUSG00000015879	ENSMUSG00000015879	Fam184b	chr5:45529705-45639501	protein_coding	0	0	0.5	0.5	0	#N/A	0
ENSMUSG00000015880	ENSMUSG00000015880	Ncapg	chr5:45669921-45700544	protein_coding	0.106194	0	0.606194	0.5	0.277851	Ncapg	0
ENSMUSG00000015882	ENSMUSG00000015882	Lcorl	chr5:45697180-45857615	protein_coding	2.50543	0.151479	3.00543	0.651479	2.20578	Lcorl	0
ENSMUSG00000037514	ENSMUSG00000037514	Pank2	chr2:131262494-131299188	protein_coding	6.72918	0.177178	7.22918	0.677178	3.41623	Pank2	1
ENSMUSG00000015890	ENSMUSG00000015890	Amdhd1	chr10:93523337-93540033	protein_coding	0.110501	0	0.610501	0.5	0.288066	#N/A	0
ENSMUSG00000031838	ENSMUSG00000031838	Ifi30	chr8:70762773-70766663	protein_coding	5.78678	0.089549	6.28678	0.589549	3.41464	Ifi30	1
ENSMUSG00000080374	ENSMUSG00000080374	Gm22953	chr2:121450669-121450770		1386.11	129.615	1386.61	130.115	3.4137	#N/A	1
ENSMUSG00000015942	ENSMUSG00000015942	Gtf2ird2	chr5:134184018-134224355	protein_coding	0.849258	0.334561	1.34926	0.834561	0.693077	Gtf2ird2	0
ENSMUSG00000015943	ENSMUSG00000015943	Bola1	chr3:96196587-96219709	protein_coding	4.30387	0	4.80387	0.5	3.2642	Bola1	0
ENSMUSG00000015944	ENSMUSG00000015944	Gatsl2	chr5:134099710-134144343	protein_coding	2.08978	0.176556	2.58978	0.676556	1.93655	Gatsl2	0
ENSMUSG00000015947	ENSMUSG00000015947	Fcgr1	chr3:96282908-96293969	protein_coding	0.128635	0	0.628635	0.5	0.330295	#N/A	0
ENSMUSG00000015950	ENSMUSG00000015950	Ncf1	chr5:134220052-134229625	protein_coding	0.189674	0	0.689674	0.5	0.463986	Ncf1	0
ENSMUSG00000015957	ENSMUSG00000015957	Wnt11	chr7:98835111-98855195	protein_coding	0.201127	0	0.701127	0.5	0.487748	Wnt11	0
ENSMUSG00000015961	ENSMUSG00000015961	Adss	chr1:177762961-177796511	protein_coding	3.71142	0.994937	4.21142	1.49494	1.49422	Adss	0
ENSMUSG00000015962	ENSMUSG00000015962	1700016C15Rik	chr1:177729813-177753324	protein_coding	0	0	0.5	0.5	0	#N/A	0
ENSMUSG00000015966	ENSMUSG00000015966	Il17rb	chr14:29996140-30008896	protein_coding	0.0337156	0.0401565	0.533716	0.540157	-0.0173063	#N/A	0
ENSMUSG00000015968	ENSMUSG00000015968	Cacna1d	chr14:30039948-30491156	protein_coding	0.00736746	0	0.507367	0.5	0.0211029	#N/A	0
ENSMUSG00000015970	ENSMUSG00000015970	Chdh	chr14:30009022-30040466	protein_coding	0.126149	0	0.626149	0.5	0.324578	#N/A	0
ENSMUSG00000015971	ENSMUSG00000015971	Actr8	chr14:29978336-29993221	protein_coding	2.44992	1.17592	2.94992	1.67592	0.815723	Actr8	0
ENSMUSG00000015668	ENSMUSG00000015668	Pdzd11	chrX:100622882-100626568	protein_coding	10.7787	0.560047	11.2787	1.06005	3.4114	Pdzd11	1
ENSMUSG00000015981	ENSMUSG00000015981	Stk32c	chr7:139103637-139213307	protein_coding	0.325545	0	0.825545	0.5	0.723419	#N/A	0
ENSMUSG00000082062	ENSMUSG00000082062	Ftl2	chr4:125504287-125504839		48.5428	4.11109	49.0428	4.61109	3.41086	#N/A	1
ENSMUSG00000016018	ENSMUSG00000016018	Skiv2l2	chr13:112867779-112927380	protein_coding	2.78241	0.497662	3.28241	0.997662	1.71813	Skiv2l2	0
ENSMUSG00000020585	ENSMUSG00000020585	Laptm4a	chr12:8921663-8938742	protein_coding	65.4898	5.70804	65.9898	6.20804	3.41003	Laptm4a	1
ENSMUSG00000016028	ENSMUSG00000016028	Celsr1	chr15:85898757-86033777	protein_coding	0.0115353	0	0.511535	0.5	0.0329057	#N/A	0
ENSMUSG00000016087	ENSMUSG00000016087	Fli1	chr9:32422207-32541389	protein_coding	0.339554	0	0.839554	0.5	0.747695	#N/A	0
ENSMUSG00000016128	ENSMUSG00000016128	Stard13	chr5:151037627-151233836	protein_coding	0.907342	0.0278298	1.40734	0.52783	1.41483	Stard13	0
ENSMUSG00000016150	ENSMUSG00000016150	Tenm1	chrX:42527865-43429126	protein_coding	0.0944487	0.529025	0.594449	1.02902	-0.791654	#N/A	0
ENSMUSG00000016179	ENSMUSG00000016179	Camk1g	chr1:193346345-193370297	protein_coding	0.321417	0	0.821417	0.5	0.716187	Camk1g	0
ENSMUSG00000016181	ENSMUSG00000016181	Diexf	chr1:193104402-193130251	protein_coding	0.733317	0.659345	1.23332	1.15935	0.0892337	Diexf	0
ENSMUSG00000002718	ENSMUSG00000002718	Cse1l	chr2:166906039-166946389	protein_coding	8.74948	0.371986	9.24948	0.871986	3.407	Cse1l	1
ENSMUSG00000016200	ENSMUSG00000016200	Syt14	chr1:192897306-193035698	protein_coding	0.0396362	0	0.539636	0.5	0.110059	#N/A	0
ENSMUSG00000016206	ENSMUSG00000016206	H2-M3	chr17:37270219-37274484	protein_coding	1.49179	1.15885	1.99179	1.65885	0.263882	H2-M3	0
ENSMUSG00000016239	ENSMUSG00000016239	Lonrf3	chrX:36328352-36362341	protein_coding	0.544352	0	1.04435	0.5	1.06261	Lonrf3	0
ENSMUSG00000053510	ENSMUSG00000053510	Nrd1	chr4:109000654-109061777	protein_coding	7.73708	0.277001	8.23708	0.777001	3.40614	Nrd1	1
ENSMUSG00000049539	ENSMUSG00000049539	Hist1h1a	chr13:23763667-23764414	protein_coding	4.7986	0	5.2986	0.5	3.40561	#N/A	1
ENSMUSG00000016255	ENSMUSG00000016255	Tubb1	chr2:174450694-174457882	protein_coding	0	0	0.5	0.5	0	#N/A	0
ENSMUSG00000082179	ENSMUSG00000082179	Gm11407	chr4:80002330-80003388		38.6663	3.19845	39.1663	3.69845	3.40462	#N/A	1
ENSMUSG00000032554	ENSMUSG00000032554	Trf	chr9:103204000-103230444	protein_coding	54.7165	4.71727	55.2165	5.21727	3.40373	Trf	1
ENSMUSG00000016262	ENSMUSG00000016262	Sertad4	chr1:192844430-192855752	protein_coding	0.673689	0	1.17369	0.5	1.23105	#N/A	0
ENSMUSG00000016283	ENSMUSG00000016283	H2-M2	chr17:37480850-37483552	protein_coding	0.0298258	0.0133324	0.529826	0.513332	0.0456248	#N/A	0
ENSMUSG00000003500	ENSMUSG00000003500	Impdh1	chr6:29200433-29216364	protein_coding	163.991	15.0484	164.491	15.5484	3.40317	Impdh1	1
ENSMUSG00000002768	ENSMUSG00000002768	Mea1	chr17:46681136-46683105	protein_coding	16.1777	1.0767	16.6777	1.5767	3.40294	Mea1	1
ENSMUSG00000016327	ENSMUSG00000016327	Atp1b4	chrX:38316183-38336769	protein_coding	0	0	0.5	0.5	0	#N/A	0
ENSMUSG00000094708	ENSMUSG00000094708	Gm10359	chr5:105862700-105863702		26.2039	2.02577	26.7039	2.52577	3.40226	#N/A	1
ENSMUSG00000016346	ENSMUSG00000016346	Kcnq2	chr2:181075578-181135291	protein_coding	0.0595893	0.113818	0.559589	0.613818	-0.133443	#N/A	0
ENSMUSG00000016349	ENSMUSG00000016349	Eef1a2	chr2:181147652-181157014	protein_coding	0.097272	0	0.597272	0.5	0.25646	#N/A	0
ENSMUSG00000016356	ENSMUSG00000016356	Col20a1	chr2:180986534-181017540	protein_coding	0.206727	1.6911	0.706727	2.1911	-1.63243	Col20a1	0
ENSMUSG00000028096	ENSMUSG00000028096	Gpr89	chr3:96868280-96905346	protein_coding	4.78373	0	5.28373	0.5	3.40156	Gpr89	1
ENSMUSG00000016386	ENSMUSG00000016386	Mpped2	chr2:106693268-106868356	protein_coding	0	0	0.5	0.5	0	#N/A	0
ENSMUSG00000016409	ENSMUSG00000016409	Nkap	chrX:37126794-37150746	protein_coding	0.692757	0.044976	1.19276	0.544976	1.13004	Nkap	0
ENSMUSG00000024914	ENSMUSG00000024914	Drap1	chr19:5422804-5424979	protein_coding	61.5274	5.37398	62.0274	5.87398	3.4005	Drap1	1
ENSMUSG00000016458	ENSMUSG00000016458	Wt1	chr2:105126528-105173616	protein_coding	0.0789233	0	0.578923	0.5	0.211444	#N/A	0
ENSMUSG00000026155	ENSMUSG00000026155	Smap1	chr1:23844845-23922317	protein_coding	6.9935	0.209872	7.4935	0.709872	3.40001	Smap1	1
ENSMUSG00000016481	ENSMUSG00000016481	Cr1l	chr1:195103788-195131570	protein_coding	3.91846	0.988587	4.41846	1.48859	1.5696	Cr1l	0
ENSMUSG00000008036	ENSMUSG00000008036	Ap2s1	chr7:16738409-16749294	protein_coding	25.4695	1.96056	25.9695	2.46056	3.39976	Ap2s1	1
ENSMUSG00000016493	ENSMUSG00000016493	Cd46	chr1:195041284-195092248	protein_coding	0.0747734	0	0.574773	0.5	0.201065	Cd46	0
ENSMUSG00000016494	ENSMUSG00000016494	Cd34	chr1:194938820-194961292	protein_coding	3.54855	0.193872	4.04855	0.693872	2.54466	Cd34	0
ENSMUSG00000028111	ENSMUSG00000028111	Ctsk	chr3:95499285-95509362	protein_coding	24.2585	1.84926	24.7585	2.34926	3.39765	Ctsk	1
ENSMUSG00000016496	ENSMUSG00000016496	Cd274	chr19:29367454-29388095	protein_coding	0.556792	0.364511	1.05679	0.864511	0.289735	Cd274	0
ENSMUSG00000016498	ENSMUSG00000016498	Pdcd1lg2	chr19:29410918-29471157	protein_coding	0	0	0.5	0.5	0	#N/A	0
ENSMUSG00000016503	ENSMUSG00000016503	Gtf3a	chr5:146948656-146955614	protein_coding	2.77993	0	3.27993	0.5	2.71367	Gtf3a	0
ENSMUSG00000078636	ENSMUSG00000078636	Gm7336	chr7:51746696-51747698		24.2473	1.85044	24.7473	2.35044	3.39627	#N/A	1
ENSMUSG00000016520	ENSMUSG00000016520	Lnx2	chr5:147016654-147076586	protein_coding	2.70388	0	3.20388	0.5	2.67982	Lnx2	0
ENSMUSG00000016524	ENSMUSG00000016524	Il19	chr1:130932657-130940073	protein_coding	0	0	0.5	0.5	0	#N/A	0
ENSMUSG00000016526	ENSMUSG00000016526	Dyrk3	chr1:131128440-131138234	protein_coding	0.0652516	0	0.565252	0.5	0.176965	#N/A	0
ENSMUSG00000050953	ENSMUSG00000050953	Gja1	chr10:56377299-56390419	protein_coding	13.2985	0.810575	13.7985	1.31058	3.39624	Gja1	1
ENSMUSG00000016529	ENSMUSG00000016529	Il10	chr1:131019844-131024974	protein_coding	0	0	0.5	0.5	0	#N/A	0
ENSMUSG00000029772	ENSMUSG00000029772	Ahcyl2	chr6:29768010-29912310	protein_coding	44.0816	3.73542	44.5816	4.23542	3.39587	Ahcyl2	1
ENSMUSG00000094122	ENSMUSG00000094122	Rpl31-ps9	chr1:129801386-129801764		17.8667	1.24574	18.3667	1.74574	3.39518	#N/A	1
ENSMUSG00000016552	ENSMUSG00000016552	Foxred2	chr15:77940521-77956722	protein_coding	0.85287	0.148375	1.35287	0.648375	1.06112	#N/A	0
ENSMUSG00000064339	ENSMUSG00000064339	mt-Rnr2	chrM:1093-2675		535.657	50.4748	536.157	50.9748	3.3948	#N/A	1
ENSMUSG00000069939	ENSMUSG00000069939	Gm12070	chr11:26785107-26787814		26.9441	2.11096	27.4441	2.61096	3.39384	#N/A	1
ENSMUSG00000026749	ENSMUSG00000026749	Nek6	chr2:38511642-38588041	protein_coding	7.11693	0.224785	7.61693	0.724785	3.39358	Nek6	1
ENSMUSG00000016624	ENSMUSG00000016624	Phf21b	chr15:84785380-84856049	protein_coding	0.116524	0.214615	0.616524	0.714615	-0.213009	#N/A	0
ENSMUSG00000016626	ENSMUSG00000016626	Nlrp14	chr7:107166989-107198102	protein_coding	0	0	0.5	0.5	0	#N/A	0
ENSMUSG00000016637	ENSMUSG00000016637	Ift27	chr15:78159464-78174108	protein_coding	4.05826	0.69083	4.55826	1.19083	1.93652	Ift27	0
ENSMUSG00000083405	ENSMUSG00000083405	Gm15725	chr16:37882541-37883631		49.1302	4.2256	49.6302	4.7256	3.39265	#N/A	1
ENSMUSG00000016756	ENSMUSG00000016756	Cmah	chr13:24327419-24477285	protein_coding	0.773689	0.370786	1.27369	0.870786	0.548623	Cmah	0
ENSMUSG00000022186	ENSMUSG00000022186	Oxct1	chr15:4026382-4155344	protein_coding	62.0556	5.45778	62.5556	5.95778	3.39229	Oxct1	1
ENSMUSG00000016758	ENSMUSG00000016758	Bik	chr15:83526861-83544635	protein_coding	0	0	0.5	0.5	0	#N/A	0
ENSMUSG00000016763	ENSMUSG00000016763	Scube1	chr15:83602582-83725021	protein_coding	0.0333707	0.000488384	0.533371	0.500488	0.091802	#N/A	0
ENSMUSG00000016831	ENSMUSG00000016831	Tox4	chr14:52279145-52296391	protein_coding	4.39716	0.881518	4.89716	1.38152	1.82569	Tox4	0
ENSMUSG00000014771	ENSMUSG00000014771	Pdcd2	chr17:15519207-15527301	protein_coding	4.74792	0	5.24792	0.5	3.39175	Pdcd2	1
ENSMUSG00000016918	ENSMUSG00000016918	Sulf1	chr1:12692429-12860371	protein_coding	1.49186	0.102627	1.99186	0.602627	1.72478	Sulf1	0
ENSMUSG00000036206	ENSMUSG00000036206	Sh3bp4	chr1:89070414-89155068	protein_coding	4.74324	0	5.24324	0.5	3.39046	Sh3bp4	1
ENSMUSG00000006998	ENSMUSG00000006998	Psmd2	chr16:20651651-20663414	protein_coding	48.637	4.18815	49.137	4.68815	3.38972	Psmd2	1
ENSMUSG00000021557	ENSMUSG00000021557	Agtpbp1	chr13:59449536-59585227	protein_coding	7.74849	0.287191	8.24849	0.787191	3.38934	Agtpbp1	1
ENSMUSG00000016942	ENSMUSG00000016942	Tmprss6	chr15:78439667-78468634	protein_coding	0.0412881	0.34462	0.541288	0.84462	-0.641906	#N/A	0
ENSMUSG00000016946	ENSMUSG00000016946	Kctd5	chr17:24047733-24073485	protein_coding	3.27076	1.60543	3.77076	2.10543	0.84074	Kctd5	0
ENSMUSG00000016982	ENSMUSG00000016982	Pom121l2	chr13:21981180-21988734	protein_coding	0	0	0.5	0.5	0	#N/A	0
ENSMUSG00000016984	ENSMUSG00000016984	Etaa1	chr11:17938755-17953875	protein_coding	0.342453	0	0.842453	0.5	0.752668	Etaa1	0
ENSMUSG00000016995	ENSMUSG00000016995	Matn4	chr2:164389392-164405160	protein_coding	0	0	0.5	0.5	0	#N/A	0
ENSMUSG00000016998	ENSMUSG00000016998	Svs4	chr2:164275951-164278459	protein_coding	0	0	0.5	0.5	0	#N/A	0
ENSMUSG00000017000	ENSMUSG00000017000	Svs6	chr2:164316750-164318453	protein_coding	0	0	0.5	0.5	0	#N/A	0
ENSMUSG00000017002	ENSMUSG00000017002	Slpi	chr2:164354069-164389095	protein_coding	0.0859337	0	0.585934	0.5	0.228809	Slpi	0
ENSMUSG00000017003	ENSMUSG00000017003	Svs3a	chr2:164289267-164291500	protein_coding	0	0	0.5	0.5	0	#N/A	0
ENSMUSG00000017004	ENSMUSG00000017004	Svs5	chr2:164332739-164334396	protein_coding	0	0	0.5	0.5	0	#N/A	0
ENSMUSG00000017007	ENSMUSG00000017007	Rbpjl	chr2:164403140-164415448	protein_coding	0	0	0.5	0.5	0	#N/A	0
ENSMUSG00000031902	ENSMUSG00000031902	Nfatc3	chr8:106059602-106130537	protein_coding	5.40081	0.0638956	5.90081	0.563896	3.38741	Nfatc3	1
ENSMUSG00000017049	ENSMUSG00000017049	Ccdc70	chr8:21969774-21974041	protein_coding	0	0	0.5	0.5	0	#N/A	0
ENSMUSG00000017057	ENSMUSG00000017057	Il13ra1	chrX:36112109-36171259	protein_coding	0.405481	0	0.905481	0.5	0.856756	Il13ra1	0
ENSMUSG00000017064	ENSMUSG00000017064	Prl5a1	chr13:28142483-28151611	protein_coding	0	0	0.5	0.5	0	#N/A	0
ENSMUSG00000024608	ENSMUSG00000024608	Rps14	chr18:60774509-60778546	protein_coding	139.298	12.8639	139.798	13.3639	3.38693	Rps14	1
ENSMUSG00000024981	ENSMUSG00000024981	Acsl5	chr19:55253368-55296627	protein_coding	4.9803	0.0249514	5.4803	0.524951	3.384	Acsl5	1
ENSMUSG00000017144	ENSMUSG00000017144	Rnd3	chr2:51130437-51149111	protein_coding	3.56879	0.335327	4.06879	0.835327	2.28419	Rnd3	0
ENSMUSG00000017146	ENSMUSG00000017146	Brca1	chr11:101488763-101551955	protein_coding	0.823026	0.423154	1.32303	0.923154	0.519198	Brca1	0
ENSMUSG00000017165	ENSMUSG00000017165	Gast	chr11:100334406-100336996	protein_coding	0	0	0.5	0.5	0	#N/A	0
ENSMUSG00000017167	ENSMUSG00000017167	Cntnap1	chr11:101170522-101190724	protein_coding	2.02694	2.76813	2.52694	3.26813	-0.371074	Cntnap1	0
ENSMUSG00000033352	ENSMUSG00000033352	Map2k4	chr11:65688242-65788297	protein_coding	27.8287	2.21506	28.3287	2.71506	3.38321	Map2k4	1
ENSMUSG00000055737	ENSMUSG00000055737	Ghr	chr15:3317759-3583492	protein_coding	54.8969	4.811	55.3969	5.311	3.38275	Ghr	1
ENSMUSG00000017195	ENSMUSG00000017195	Zpbp2	chr11:98551096-98558665	protein_coding	0.54984	0	1.04984	0.5	1.07017	Zpbp2	0
ENSMUSG00000017204	ENSMUSG00000017204	Gsdma	chr11:98664350-98677708	protein_coding	0	0	0.5	0.5	0	#N/A	0
ENSMUSG00000031095	ENSMUSG00000031095	Cul4b	chrX:38533273-38576196	protein_coding	6.82951	0.202778	7.32951	0.702778	3.38258	Cul4b	1
ENSMUSG00000017211	ENSMUSG00000017211	Gsdma2	chr11:98646758-98657964	protein_coding	0	0	0.5	0.5	0	#N/A	0
ENSMUSG00000095847	ENSMUSG00000095847	Gm5451	chr13:66874080-66874659		5.3125	0.057372	5.8125	0.557372	3.38245	Gm5451	1
ENSMUSG00000027074	ENSMUSG00000027074	Slc43a3	chr2:84936578-84958509	protein_coding	21.6495	1.62983	22.1495	2.12983	3.37846	Slc43a3	1
ENSMUSG00000063458	ENSMUSG00000063458	1700112E06Rik	chr14:22019711-23056085	protein_coding	7.35452	0.255428	7.85452	0.755428	3.37816	1700112E06Rik	1
ENSMUSG00000049517	ENSMUSG00000049517	Rps23	chr13:90923130-90924942	protein_coding	59.8628	5.31408	60.3628	5.81408	3.37604	Rps23	1
ENSMUSG00000017291	ENSMUSG00000017291	Taok1	chr11:77529161-77607815	protein_coding	3.4273	0.752328	3.9273	1.25233	1.64893	Taok1	0
ENSMUSG00000017299	ENSMUSG00000017299	Dnttip1	chr2:164745982-164768607	protein_coding	3.78061	3.06408	4.28061	3.56408	0.264287	Dnttip1	0
ENSMUSG00000017300	ENSMUSG00000017300	Tnnc2	chr2:164777160-164779967	protein_coding	0.799837	0	1.29984	0.5	1.37833	Tnnc2	0
ENSMUSG00000082319	ENSMUSG00000082319	Gm8822	chrX:81820383-81822730		7.24864	0.247006	7.74864	0.747006	3.37475	#N/A	1
ENSMUSG00000017309	ENSMUSG00000017309	Cd300lg	chr11:102041508-102055620	protein_coding	0.798923	0.108639	1.29892	0.608639	1.09366	Cd300lg	0
ENSMUSG00000017310	ENSMUSG00000017310	Spint4	chr2:164698500-164702453	protein_coding	0	0	0.5	0.5	0	#N/A	0
ENSMUSG00000017311	ENSMUSG00000017311	Pyy	chr11:102106675-102107832	protein_coding	0	0	0.5	0.5	0	#N/A	0
ENSMUSG00000017314	ENSMUSG00000017314	Mpp2	chr11:102057014-102088515	protein_coding	1.00241	0.436949	1.50241	0.936949	0.681236	Mpp2	0
ENSMUSG00000017316	ENSMUSG00000017316	Ppy	chr11:102099929-102101319	protein_coding	0	0	0.5	0.5	0	#N/A	0
ENSMUSG00000017344	ENSMUSG00000017344	Vtn	chr11:78499090-78502324	protein_coding	0.544329	0	1.04433	0.5	1.06258	Vtn	0
ENSMUSG00000017376	ENSMUSG00000017376	Nlk	chr11:78567167-78697373	protein_coding	3.38368	0.454459	3.88368	0.954459	2.02467	Nlk	0
ENSMUSG00000033623	ENSMUSG00000033623	Pcgf3	chr5:108461231-108506976	protein_coding	10.1232	0.526122	10.6232	1.02612	3.37194	Pcgf3	1
ENSMUSG00000017390	ENSMUSG00000017390	Aldoc	chr11:78322967-78327781	protein_coding	0.438437	0	0.938437	0.5	0.908332	Aldoc	0
ENSMUSG00000017400	ENSMUSG00000017400	Stac2	chr11:98036622-98053462	protein_coding	1.23381	2.7674	1.73381	3.2674	-0.914197	Stac2	0
ENSMUSG00000039770	ENSMUSG00000039770	Ypel5	chr17:72836703-72851195	protein_coding	13.5038	0.853231	14.0038	1.35323	3.37134	Ypel5	1
ENSMUSG00000017405	ENSMUSG00000017405	Nek8	chr11:78166105-78176675	protein_coding	2.12573	0.744712	2.62573	1.24471	1.07691	Nek8	0
ENSMUSG00000017412	ENSMUSG00000017412	Cacnb4	chr2:52428319-52676831	protein_coding	0.0747262	0.0242062	0.574726	0.524206	0.13274	Cacnb4	0
ENSMUSG00000017417	ENSMUSG00000017417	Plxdc1	chr11:97923237-97986444	protein_coding	0.0274071	0.354192	0.527407	0.854192	-0.695643	#N/A	0
ENSMUSG00000017418	ENSMUSG00000017418	Arl5b	chr2:15049394-15082456	protein_coding	3.44863	0.191412	3.94863	0.691412	2.51373	Arl5b	0
ENSMUSG00000095042	ENSMUSG00000095042	Gm12537	chr4:57370952-57371954		26.534	2.11401	27.034	2.61401	3.37044	#N/A	1
ENSMUSG00000029642	ENSMUSG00000029642	Polr1d	chr5:147077049-147111361	protein_coding	27.5606	2.21366	28.0606	2.71366	3.37023	Polr1d	1
ENSMUSG00000066568	ENSMUSG00000066568	Lsm14a	chr7:34344645-34389540	protein_coding	14.8872	0.989461	15.3872	1.48946	3.36887	Lsm14a	1
ENSMUSG00000017453	ENSMUSG00000017453	Pipox	chr11:77880614-77894096	protein_coding	0.237372	0	0.737372	0.5	0.560465	#N/A	0
ENSMUSG00000036427	ENSMUSG00000036427	Gpi1	chr7:34202121-34230289	protein_coding	266.323	25.3376	266.823	25.8376	3.36834	Gpi1	1
ENSMUSG00000017485	ENSMUSG00000017485	Top2b	chr14:16365178-16430787	protein_coding	4.1255	0.720985	4.6255	1.22098	1.92156	Top2b	0
ENSMUSG00000017491	ENSMUSG00000017491	Rarb	chr14:16430841-16575472	protein_coding	0.217655	0.0259526	0.717655	0.525953	0.448358	Rarb	0
ENSMUSG00000024442	ENSMUSG00000024442	0610009O20Rik	chr18:38250248-38262629	protein_coding	7.40357	0.265477	7.90357	0.765477	3.36807	0610009O20Rik	1
ENSMUSG00000017499	ENSMUSG00000017499	Cdc6	chr11:98907800-98923940	protein_coding	0.0527653	0	0.552765	0.5	0.144739	#N/A	0
ENSMUSG00000017548	ENSMUSG00000017548	Suz12	chr11:79993105-80034123	protein_coding	1.45193	0.195107	1.95193	0.695107	1.48959	Suz12	0
ENSMUSG00000017550	ENSMUSG00000017550	Atad5	chr11:80089399-80135794	protein_coding	0.0567305	0.0677596	0.556731	0.56776	-0.0283011	Atad5	0
ENSMUSG00000017561	ENSMUSG00000017561	Crlf3	chr11:80046492-80080991	protein_coding	0.953317	0.965645	1.45332	1.46564	-0.0121863	Crlf3	0
ENSMUSG00000017588	ENSMUSG00000017588	Krt27	chr11:99345564-99351104	protein_coding	0	0	0.5	0.5	0	#N/A	0
ENSMUSG00000017607	ENSMUSG00000017607	Tns4	chr11:99065677-99089306	protein_coding	0.0759393	0.302046	0.575939	0.802046	-0.477768	#N/A	0
ENSMUSG00000067274	ENSMUSG00000067274	Rplp0	chr5:115559466-115563727	protein_coding	231.845	22.0137	232.345	22.5137	3.36739	Rplp0	1
ENSMUSG00000017631	ENSMUSG00000017631	Abr	chr11:76416733-76622314	protein_coding	2.53849	3.80659	3.03849	4.30659	-0.503191	Abr	0
ENSMUSG00000017639	ENSMUSG00000017639	Rab11fip4	chr11:79591211-79698023	protein_coding	0.235562	0	0.735562	0.5	0.556919	#N/A	0
ENSMUSG00000017652	ENSMUSG00000017652	Cd40	chr2:165055626-165072948	protein_coding	0.603255	0.310092	1.10325	0.810092	0.445609	#N/A	0
ENSMUSG00000017664	ENSMUSG00000017664	Slc35c2	chr2:165276553-165287869	protein_coding	4.11179	2.27565	4.61179	2.77565	0.732501	Slc35c2	0
ENSMUSG00000017667	ENSMUSG00000017667	Zfp334	chr2:165374263-165388259	protein_coding	0.511115	0.0744486	1.01111	0.574449	0.815697	Zfp334	0
ENSMUSG00000024121	ENSMUSG00000024121	Atp6v0c	chr17:24163865-24169702	protein_coding	53.0966	4.7	53.5966	5.2	3.36556	Atp6v0c	1
ENSMUSG00000017677	ENSMUSG00000017677	Wsb1	chr11:79239371-79254671	protein_coding	1.79156	1.03855	2.29156	1.53855	0.574759	Wsb1	0
ENSMUSG00000017679	ENSMUSG00000017679	Ttpal	chr2:163602313-163619013	protein_coding	3.05648	0.322969	3.55648	0.822969	2.11154	Ttpal	0
ENSMUSG00000026270	ENSMUSG00000026270	Capn10	chr1:92934375-92947941	protein_coding	4.65339	0	5.15339	0.5	3.36552	Capn10	1
ENSMUSG00000017688	ENSMUSG00000017688	Hnf4g	chr3:3508029-3659775	protein_coding	0.0669118	0.0439468	0.566912	0.543947	0.0596587	#N/A	0
ENSMUSG00000017692	ENSMUSG00000017692	Rhbdl3	chr11:80300911-80355955	protein_coding	1.65218	0.163341	2.15218	0.663341	1.69798	Rhbdl3	0
ENSMUSG00000017697	ENSMUSG00000017697	Ada	chr2:163726583-163750239	protein_coding	0.448141	0	0.948141	0.5	0.923174	Ada	0
ENSMUSG00000082431	ENSMUSG00000082431	Gm7110	chr1:99790428-99791025		4.65177	0	5.15177	0.5	3.36507	#N/A	1
ENSMUSG00000017713	ENSMUSG00000017713	Tha1	chr11:117867951-117873481	protein_coding	1.50874	1.21233	2.00874	1.71233	0.23033	Tha1	0
ENSMUSG00000043384	ENSMUSG00000043384	Gprasp1	chrX:135742732-135803474	protein_coding	4.65003	0	5.15003	0.5	3.36458	Gprasp1	1
ENSMUSG00000017716	ENSMUSG00000017716	Birc5	chr11:117849250-117855743	protein_coding	1.09669	0.653233	1.59669	1.15323	0.4694	Birc5	0
ENSMUSG00000017718	ENSMUSG00000017718	Afmid	chr11:117825923-117839908	protein_coding	0.28952	0	0.78952	0.5	0.659048	Afmid	0
ENSMUSG00000017720	ENSMUSG00000017720	Trp53tg5	chr2:164470300-164473724	protein_coding	0	0.948712	0.5	1.44871	-1.53477	#N/A	0
ENSMUSG00000087304	ENSMUSG00000087304	Gm15415	chr7:96906825-96947034		5.01313	0.0355631	5.51313	0.535563	3.36374	#N/A	1
ENSMUSG00000017723	ENSMUSG00000017723	Wfdc2	chr2:164562412-164568510	protein_coding	0	0	0.5	0.5	0	#N/A	0
ENSMUSG00000017724	ENSMUSG00000017724	Etv4	chr11:101769741-101785371	protein_coding	0.136147	0.0341964	0.636147	0.534196	0.25199	#N/A	0
ENSMUSG00000017733	ENSMUSG00000017733	Eppin	chr2:164588342-164593594	protein_coding	0	0	0.5	0.5	0	#N/A	0
ENSMUSG00000017734	ENSMUSG00000017734	Dbndd2	chr2:164486105-164493319	protein_coding	2.67068	1.47715	3.17068	1.97715	0.68137	Dbndd2	0
ENSMUSG00000017737	ENSMUSG00000017737	Mmp9	chr2:164940779-164955850	protein_coding	0	0	0.5	0.5	0	#N/A	0
ENSMUSG00000017740	ENSMUSG00000017740	Slc12a5	chr2:164960815-164999727	protein_coding	0.118912	0.481552	0.618912	0.981552	-0.66533	#N/A	0
ENSMUSG00000017747	ENSMUSG00000017747	Ghdc	chr11:100766031-100770957	protein_coding	3.46352	1.31134	3.96352	1.81134	1.12972	Ghdc	0
ENSMUSG00000061360	ENSMUSG00000061360	Phf5a	chr15:81865318-81871911	protein_coding	9.10003	0.434044	9.60003	0.934044	3.36148	Phf5a	1
ENSMUSG00000029467	ENSMUSG00000029467	Atp2a2	chr5:122442701-122502225	protein_coding	31.4431	2.60965	31.9431	3.10965	3.36068	Atp2a2	1
ENSMUSG00000039168	ENSMUSG00000039168	Dap	chr15:31224384-31274338	protein_coding	22.4888	1.73848	22.9888	2.23848	3.36034	Dap	1
ENSMUSG00000017764	ENSMUSG00000017764	Zswim1	chr2:164822685-164826871	protein_coding	1.72311	0.0292856	2.22311	0.529286	2.07046	Zswim1	0
ENSMUSG00000094334	ENSMUSG00000094334	Fabp5l2	chr18:7581515-7581923		9.46845	0.47101	9.96845	0.97101	3.35981	#N/A	1
ENSMUSG00000017767	ENSMUSG00000017767	Spata25	chr2:164826388-164828537	protein_coding	0.378861	0	0.878861	0.5	0.813707	#N/A	0
ENSMUSG00000000134	ENSMUSG00000000134	Tfe3	chrX:7762559-7775202	protein_coding	13.6925	0.882522	14.1925	1.38252	3.35975	Tfe3	1
ENSMUSG00000033460	ENSMUSG00000033460	Armcx1	chrX:134717962-134721917	protein_coding	5.02208	0.0386288	5.52208	0.538629	3.35785	Armcx1	1
ENSMUSG00000021123	ENSMUSG00000021123	Rdh12	chr12:79208913-79222665	protein_coding	11.3709	0.658569	11.8709	1.15857	3.35701	Rdh12	1
ENSMUSG00000030824	ENSMUSG00000030824	Nucb1	chr7:45492873-45510406	protein_coding	109.185	10.205	109.685	10.705	3.35701	Nucb1	1
ENSMUSG00000073838	ENSMUSG00000073838	Tufm	chr7:126487354-126490730	protein_coding	55.2639	4.95367	55.7639	5.45367	3.35403	Tufm	1
ENSMUSG00000084067	ENSMUSG00000084067	Gm14269	chr2:170463513-170463819		6.94225	0.228293	7.44225	0.728293	3.35315	#N/A	1
ENSMUSG00000017817	ENSMUSG00000017817	Jph2	chr2:163336241-163397993	protein_coding	0.0156707	0	0.515671	0.5	0.044522	#N/A	0
ENSMUSG00000044306	ENSMUSG00000044306	4930500M09Rik	chr1:170214859-170215556	protein_coding	4.60686	0	5.10686	0.5	3.35244	#N/A	1
ENSMUSG00000017831	ENSMUSG00000017831	Rab5a	chr17:53479233-53507671	protein_coding	2.74292	0.440559	3.24292	0.940559	1.7857	Rab5a	0
ENSMUSG00000017832	ENSMUSG00000017832	Hspb9	chr11:100713849-100714575	protein_coding	0.108082	1.32707	0.608082	1.82707	-1.58719	#N/A	0
ENSMUSG00000094989	ENSMUSG00000094989	Rpl9-ps4	chr13:72454761-72455340		11.5662	0.682727	12.0662	1.18273	3.35078	#N/A	1
ENSMUSG00000032349	ENSMUSG00000032349	Elovl5	chr9:77917363-77984519	protein_coding	13.7525	0.897554	14.2525	1.39755	3.35024	Elovl5	1
ENSMUSG00000079311	ENSMUSG00000079311	Gm3222	chr17:14709065-14710055		10.4212	0.570962	10.9212	1.07096	3.35015	#N/A	1
ENSMUSG00000017861	ENSMUSG00000017861	Mybl2	chr2:163054686-163084688	protein_coding	0.559899	0.41067	1.0599	0.91067	0.218927	#N/A	0
ENSMUSG00000017868	ENSMUSG00000017868	Sgk2	chr2:162987329-163014127	protein_coding	0.0987092	0	0.598709	0.5	0.259927	#N/A	0
ENSMUSG00000017897	ENSMUSG00000017897	Eya2	chr2:165595031-165771727	protein_coding	1.42434	0	1.92434	0.5	1.94436	Eya2	0
ENSMUSG00000017914	ENSMUSG00000017914	BC034902	chr2:136501997-136515512	protein_coding	0.000373585	0.124052	0.500374	0.624052	-0.318661	#N/A	0
ENSMUSG00000017922	ENSMUSG00000017922	Prl3c1	chr13:27196658-27203749	protein_coding	0	0	0.5	0.5	0	#N/A	0
ENSMUSG00000025575	ENSMUSG00000025575	Cant1	chr11:118406288-118419086	protein_coding	17.1252	1.22869	17.6252	1.72869	3.34989	Cant1	1
ENSMUSG00000017943	ENSMUSG00000017943	Gdap1l1	chr2:163438475-163455324	protein_coding	0.400757	0	0.900757	0.5	0.84921	#N/A	0
ENSMUSG00000017950	ENSMUSG00000017950	Hnf4a	chr2:163506807-163572910	protein_coding	0	0	0.5	0.5	0	#N/A	0
ENSMUSG00000017969	ENSMUSG00000017969	Ptgis	chr2:167191804-167240604	protein_coding	1.64583	0	2.14583	0.5	2.10154	Ptgis	0
ENSMUSG00000017978	ENSMUSG00000017978	Cadps2	chr6:23262772-23839421	protein_coding	0.310529	0.00110661	0.810529	0.501107	0.693746	#N/A	0
ENSMUSG00000028643	ENSMUSG00000028643	Ccdc23	chr4:119195305-119201298	protein_coding	4.59227	0	5.09227	0.5	3.34831	Ccdc23	1
ENSMUSG00000082193	ENSMUSG00000082193	Rpl5-ps1	chr1:14865071-14865965		15.3961	1.06088	15.8961	1.56088	3.34824	#N/A	1
ENSMUSG00000018008	ENSMUSG00000018008	Cyth4	chr15:78597046-78622019	protein_coding	0.071291	0	0.571291	0.5	0.192298	#N/A	0
ENSMUSG00000018012	ENSMUSG00000018012	Rac3	chr11:120721469-120723969	protein_coding	0.282708	1.82792	0.782708	2.32792	-1.5725	Rac3	0
ENSMUSG00000045973	ENSMUSG00000045973	Slc25a51	chr4:45395922-45408766	protein_coding	86.3724	8.03622	86.8724	8.53622	3.34723	Slc25a51	1
ENSMUSG00000042133	ENSMUSG00000042133	Ppig	chr2:69722544-69754012	protein_coding	6.1457	0.153035	6.6457	0.653035	3.34719	Ppig	1
ENSMUSG00000018068	ENSMUSG00000018068	Ints2	chr11:86210680-86257575	protein_coding	2.20167	2.28008	2.70167	2.78008	-0.0412749	Ints2	0
ENSMUSG00000020409	ENSMUSG00000020409	Slu7	chr11:43433743-43447981	protein_coding	4.58713	0	5.08713	0.5	3.34685	Slu7	1
ENSMUSG00000063015	ENSMUSG00000063015	Ccni	chr5:93181932-93206495	protein_coding	21.7944	1.69178	22.2944	2.19178	3.34651	Ccni	1
ENSMUSG00000018126	ENSMUSG00000018126	Baiap2l2	chr15:79258194-79285537	protein_coding	0.183898	3.49815	0.683898	3.99815	-2.54748	#N/A	0
ENSMUSG00000018143	ENSMUSG00000018143	Mafk	chr5:139791512-139802653	protein_coding	0.930164	0.637721	1.43016	1.13772	0.330034	Mafk	0
ENSMUSG00000085611	ENSMUSG00000085611	Ap3s1-ps1	chrX:38685517-38686277		8.80752	0.415944	9.30752	0.915944	3.34507	#N/A	1
ENSMUSG00000018166	ENSMUSG00000018166	Erbb3	chr10:128567522-128589652	protein_coding	0.224957	0.0510991	0.724957	0.551099	0.395584	Erbb3	0
ENSMUSG00000080921	ENSMUSG00000080921	Rpl38-ps2	chr6:140746918-140747216		23.8445	1.8963	24.3445	2.3963	3.34472	#N/A	1
ENSMUSG00000018168	ENSMUSG00000018168	Ikzf3	chr11:98464901-98546031	protein_coding	0	1.13932	0.5	1.63932	-1.7131	#N/A	0
ENSMUSG00000018169	ENSMUSG00000018169	Mfng	chr15:78755881-78773475	protein_coding	0.179925	0.169975	0.679925	0.669975	0.0212684	#N/A	0
ENSMUSG00000034757	ENSMUSG00000034757	Tmub2	chr11:102284930-102289237	protein_coding	6.77864	0.216469	7.27864	0.716469	3.34469	Tmub2	1
ENSMUSG00000018189	ENSMUSG00000018189	Uchl5	chr1:143777277-143807466	protein_coding	0.368498	0.0878602	0.868498	0.58786	0.563049	Uchl5	0
ENSMUSG00000035376	ENSMUSG00000035376	Ptplb	chr16:35022420-35109175	protein_coding	15.3664	1.06254	15.8664	1.56254	3.34401	Ptplb	1
ENSMUSG00000018199	ENSMUSG00000018199	Trove2	chr1:143750789-143777068	protein_coding	1.20635	0.131371	1.70635	0.631371	1.43435	Trove2	0
ENSMUSG00000018209	ENSMUSG00000018209	Stk4	chr2:164070321-164155524	protein_coding	2.17475	0.208673	2.67475	0.708673	1.91621	Stk4	0
ENSMUSG00000018211	ENSMUSG00000018211	Wfdc15b	chr2:164214453-164221660	protein_coding	0	0	0.5	0.5	0	#N/A	0
ENSMUSG00000071419	ENSMUSG00000071419	Rps15-ps2	chr6:58017489-58017975		34.4278	2.94313	34.9278	3.44313	3.34258	#N/A	1
ENSMUSG00000018238	ENSMUSG00000018238	Gdf9	chr11:53431022-53437904	protein_coding	1.09759	0	1.59759	0.5	1.6759	#N/A	0
ENSMUSG00000018239	ENSMUSG00000018239	Zcchc10	chr11:53324678-53333301	protein_coding	0.952225	0	1.45222	0.5	1.53826	Zcchc10	0
ENSMUSG00000018259	ENSMUSG00000018259	Prl8a2	chr13:27345682-27354216	protein_coding	0	0	0.5	0.5	0	#N/A	0
ENSMUSG00000018263	ENSMUSG00000018263	Tbx5	chr5:119834662-119885218	protein_coding	0.542602	0.529166	1.0426	1.02917	0.0187128	Tbx5	0
ENSMUSG00000039100	ENSMUSG00000039100	March6	chr15:31455898-31531037	protein_coding	19.8041	1.50225	20.3041	2.00225	3.34208	#N/A	1
ENSMUSG00000090381	ENSMUSG00000090381	Gm6158	chr14:24070073-24070637		4.56785	0	5.06785	0.5	3.34137	Gm6158	1
ENSMUSG00000035372	ENSMUSG00000035372	1810055G02Rik	chr19:3708332-3717881	protein_coding	4.56026	0	5.06026	0.5	3.33921	1810055G02Rik	1
ENSMUSG00000018322	ENSMUSG00000018322	Tomm34	chr2:164053539-164071169	protein_coding	2.01937	0.880196	2.51937	1.3802	0.86819	Tomm34	0
ENSMUSG00000035765	ENSMUSG00000035765	Dym	chr18:75018771-75286966	protein_coding	6.19023	0.161147	6.69023	0.661147	3.33901	Dym	1
ENSMUSG00000035776	ENSMUSG00000035776	Cd99l2	chrX:71420059-71492849	protein_coding	23.9388	1.91592	24.4388	2.41592	3.33853	Cd99l2	1
ENSMUSG00000081272	ENSMUSG00000081272	Gm13509	chr2:49308154-49309462		12.3752	0.772912	12.8752	1.27291	3.33839	#N/A	1
ENSMUSG00000021420	ENSMUSG00000021420	Fars2	chr13:36117410-36537592	protein_coding	12.9722	0.832841	13.4722	1.33284	3.33741	Fars2	1
ENSMUSG00000018341	ENSMUSG00000018341	Il12rb2	chr6:67291317-67376188	protein_coding	0.267379	0.335088	0.767379	0.835088	-0.121989	#N/A	0
ENSMUSG00000018347	ENSMUSG00000018347	Zkscan6	chr11:65807174-65829239	protein_coding	1.74564	0	2.24564	0.5	2.16713	Zkscan6	0
ENSMUSG00000073060	ENSMUSG00000073060	Zxda	chrX:94795562-94798183		5.46033	0.0899056	5.96033	0.589906	3.33684	#N/A	1
ENSMUSG00000032324	ENSMUSG00000032324	Tspan3	chr9:56135884-56161070	protein_coding	27.4802	2.2723	27.9802	2.7723	3.33525	Tspan3	1
ENSMUSG00000018372	ENSMUSG00000018372	Cep95	chr11:106789251-106819930	protein_coding	1.22006	2.38258	1.72006	2.88258	-0.744902	Cep95	0
ENSMUSG00000018377	ENSMUSG00000018377	Vezf1	chr11:88068278-88084729	protein_coding	2.23892	0.067592	2.73892	0.567592	2.27068	Vezf1	0
ENSMUSG00000077379	ENSMUSG00000077379	Gm25170	chrX:130915298-130915427		4.5452	0	5.0452	0.5	3.33491	#N/A	1
ENSMUSG00000098111	ENSMUSG00000098111	RP23-296J16.1	chr14:103370464-103371446		11.1198	0.65322	11.6198	1.15322	3.33285	#N/A	1
ENSMUSG00000020307	ENSMUSG00000020307	Cdc34	chr10:79682194-79688394	protein_coding	45.7704	4.09309	46.2704	4.59309	3.33255	Cdc34	1
ENSMUSG00000018387	ENSMUSG00000018387	Shroom1	chr11:53457204-53467766	protein_coding	0.126342	0.361714	0.626342	0.861714	-0.460258	#N/A	0
ENSMUSG00000018395	ENSMUSG00000018395	Kif3a	chr11:53567378-53601967	protein_coding	2.66246	0.676395	3.16246	1.17639	1.42667	Kif3a	0
ENSMUSG00000028416	ENSMUSG00000028416	Bag1	chr4:40936397-40948281	protein_coding	41.2589	3.64761	41.7589	4.14761	3.33173	Bag1	1
ENSMUSG00000018401	ENSMUSG00000018401	Mtmr4	chr11:87592161-87616302	protein_coding	4.41113	1.22825	4.91113	1.72825	1.50674	Mtmr4	0
ENSMUSG00000018405	ENSMUSG00000018405	Mrm1	chr11:84813060-84819515	protein_coding	0.835824	0.642933	1.33582	1.14293	0.224989	Mrm1	0
ENSMUSG00000018411	ENSMUSG00000018411	Mapt	chr11:104231389-104332090	protein_coding	0.150257	0.0734116	0.650257	0.573412	0.181439	#N/A	0
ENSMUSG00000040952	ENSMUSG00000040952	Rps19	chr7:24884370-24889806	protein_coding	199.478	19.3634	199.978	19.8634	3.33166	Rps19	1
ENSMUSG00000021578	ENSMUSG00000021578	Ccdc127	chr13:74350308-74365783	protein_coding	5.73844	0.119794	6.23844	0.619794	3.33132	Ccdc127	1
ENSMUSG00000006736	ENSMUSG00000006736	Tspan31	chr10:127067316-127070261	protein_coding	19.0145	1.44216	19.5145	1.94216	3.32881	Tspan31	1
ENSMUSG00000022792	ENSMUSG00000022792	Yars2	chr16:16302964-16309640	protein_coding	5.06447	0.0541603	5.56447	0.55416	3.32787	Yars2	1
ENSMUSG00000018427	ENSMUSG00000018427	Ypel2	chr11:86936424-86993707	protein_coding	1.67187	0	2.17187	0.5	2.11894	Ypel2	0
ENSMUSG00000046671	ENSMUSG00000046671	Mtfr1l	chr4:134525549-134535387	protein_coding	47.7801	4.31367	48.2801	4.81367	3.32622	Mtfr1l	1
ENSMUSG00000018433	ENSMUSG00000018433	Nol11	chr11:107166662-107189381	protein_coding	3.73326	3.55086	4.23326	4.05086	0.0635409	Nol11	0
ENSMUSG00000078923	ENSMUSG00000078923	Ube2v1	chr2:167607637-167632095	protein_coding	19.1109	1.4561	19.6109	1.9561	3.3256	Ube2v1	1
ENSMUSG00000020610	ENSMUSG00000020610	Amz2	chr11:109425945-109452813	protein_coding	8.44958	0.392971	8.94958	0.892971	3.32513	Amz2	1
ENSMUSG00000018449	ENSMUSG00000018449	Rpain	chr11:70970212-70977833	protein_coding	2.80216	0	3.30216	0.5	2.72341	Rpain	0
ENSMUSG00000018451	ENSMUSG00000018451	6330403K07Rik	chr11:71031940-71033513		0.186378	0	0.686378	0.5	0.457075	6330403K07Rik	0
ENSMUSG00000018459	ENSMUSG00000018459	Slc13a3	chr2:165405027-165473230	protein_coding	0.244934	0	0.744934	0.5	0.575185	#N/A	0
ENSMUSG00000018470	ENSMUSG00000018470	Kcnab3	chr11:69326257-69333042	protein_coding	0.207159	1.11275	0.707159	1.61275	-1.18942	#N/A	0
ENSMUSG00000025872	ENSMUSG00000025872	Thoc3	chr13:54458836-54468849	protein_coding	7.59693	0.308064	8.09693	0.808064	3.32483	Thoc3	1
ENSMUSG00000024601	ENSMUSG00000024601	Isoc1	chr18:58659481-58679570	protein_coding	11.9616	0.744099	12.4616	1.2441	3.32432	Isoc1	1
ENSMUSG00000018479	ENSMUSG00000018479	1700125H20Rik	chr11:85170403-85181145	protein_coding	0	0	0.5	0.5	0	#N/A	0
ENSMUSG00000054733	ENSMUSG00000054733	Msra	chr14:64122622-64455903	protein_coding	18.0506	1.35312	18.5506	1.85312	3.32344	Msra	1
ENSMUSG00000018486	ENSMUSG00000018486	Wnt9b	chr11:103727363-103749821	protein_coding	0	0	0.5	0.5	0	#N/A	0
ENSMUSG00000018500	ENSMUSG00000018500	Adora2b	chr11:62248983-62266453	protein_coding	0.184899	0	0.684899	0.5	0.453963	#N/A	0
ENSMUSG00000033355	ENSMUSG00000033355	Rtp4	chr16:23609918-23614222	protein_coding	19.7204	1.52168	20.2204	2.02168	3.32218	Rtp4	1
ENSMUSG00000025616	ENSMUSG00000025616	Usp16	chr16:87454702-87483517	protein_coding	9.2282	0.474378	9.7282	0.974378	3.31962	Usp16	1
ENSMUSG00000012848	ENSMUSG00000012848	Rps5	chr7:12922289-12926686	protein_coding	128.724	12.4474	129.224	12.9474	3.31914	Rps5	1
ENSMUSG00000031490	ENSMUSG00000031490	Eif4ebp1	chr8:27260326-27275656	protein_coding	190.062	18.671	190.562	19.171	3.31326	Eif4ebp1	1
ENSMUSG00000018541	ENSMUSG00000018541	Cwc25	chr11:97745480-97766556	protein_coding	1.95975	0.256145	2.45975	0.756145	1.70178	Cwc25	0
ENSMUSG00000018543	ENSMUSG00000018543	1700001P01Rik	chr11:97771480-97775918	protein_coding	0	0	0.5	0.5	0	#N/A	0
ENSMUSG00000081221	ENSMUSG00000081221	Gm14760	chrX:80193850-80194852		17.4821	1.30944	17.9821	1.80944	3.31295	#N/A	1
ENSMUSG00000018548	ENSMUSG00000018548	Trim37	chr11:87127076-87220683	protein_coding	1.41128	1.68669	1.91128	2.18669	-0.19421	Trim37	0
ENSMUSG00000044609	ENSMUSG00000044609	Gm9294	chr7:42953596-42954388		7.54168	0.309449	8.04168	0.809449	3.31248	#N/A	1
ENSMUSG00000008734	ENSMUSG00000008734	Gprc5b	chr7:118972039-118995211	protein_coding	24.3511	2.00323	24.8511	2.50323	3.31145	Gprc5b	1
ENSMUSG00000028124	ENSMUSG00000028124	Gclm	chr3:122245556-122269984	protein_coding	14.0073	0.961319	14.5073	1.46132	3.31144	Gclm	1
ENSMUSG00000050195	ENSMUSG00000050195	Scd4	chr19:44333091-44346743	protein_coding	18.2188	1.38687	18.7188	1.88687	3.31042	Scd4	1
ENSMUSG00000055900	ENSMUSG00000055900	Tmem69	chr4:116551632-116555936	protein_coding	7.5789	0.315919	8.0789	0.815919	3.30766	Tmem69	1
ENSMUSG00000018569	ENSMUSG00000018569	Cldn7	chr11:69964778-69967885	protein_coding	0	0	0.5	0.5	0	#N/A	0
ENSMUSG00000018570	ENSMUSG00000018570	2810408A11Rik	chr11:69897351-69900987	protein_coding	0.0972613	0	0.597261	0.5	0.256434	2810408A11Rik	0
ENSMUSG00000089764	ENSMUSG00000089764	Gm16580	chr17:26269335-26270379		14.3396	0.999433	14.8396	1.49943	3.30696	#N/A	1
ENSMUSG00000027942	ENSMUSG00000027942	4933434E20Rik	chr3:90051635-90063341	protein_coding	14.5948	1.02575	15.0948	1.52575	3.30646	4933434E20Rik	1
ENSMUSG00000018581	ENSMUSG00000018581	Dnahc11	chr12:117877981-118199043	protein_coding	0	0	0.5	0.5	0	#N/A	0
ENSMUSG00000000149	ENSMUSG00000000149	Gna12	chr5:140758407-140830431	protein_coding	17.6	1.32956	18.1	1.82956	3.30642	Gna12	1
ENSMUSG00000097979	ENSMUSG00000097979	RP24-363O21.2	chr6:128202012-128203276		32.1154	2.79972	32.6154	3.29972	3.30514	#N/A	1
ENSMUSG00000018589	ENSMUSG00000018589	Glra2	chrX:165129016-165327393	protein_coding	0.0605502	0.0249514	0.56055	0.524951	0.0946597	#N/A	0
ENSMUSG00000081631	ENSMUSG00000081631	Gm12005	chr11:14162078-14162457		10.7022	0.634121	11.2022	1.13412	3.30414	#N/A	1
ENSMUSG00000018595	ENSMUSG00000018595	Glra4	chrX:136757673-136780141	protein_coding	0.0372867	0	0.537287	0.5	0.103764	#N/A	0
ENSMUSG00000018599	ENSMUSG00000018599	Smcr7	chr11:60728397-60732951	protein_coding	4.24166	4.06038	4.74166	4.56038	0.0562382	Smcr7	0
ENSMUSG00000018604	ENSMUSG00000018604	Tbx3	chr5:119670668-119684724	protein_coding	0.67611	1.09636	1.17611	1.59636	-0.440763	Tbx3	0
ENSMUSG00000018620	ENSMUSG00000018620	Mmp20	chr9:7628230-7674968	protein_coding	0	0	0.5	0.5	0	#N/A	0
ENSMUSG00000018623	ENSMUSG00000018623	Mmp7	chr9:7692089-7699585	protein_coding	0	0	0.5	0.5	0	#N/A	0
ENSMUSG00000018634	ENSMUSG00000018634	Crhr1	chr11:104132854-104175523	protein_coding	0	0	0.5	0.5	0	#N/A	0
ENSMUSG00000018648	ENSMUSG00000018648	Dusp14	chr11:84048040-84069261	protein_coding	1.54471	0	2.04471	0.5	2.0319	Dusp14	0
ENSMUSG00000018651	ENSMUSG00000018651	Tada2a	chr11:84078919-84129600	protein_coding	1.42609	1.27045	1.92609	1.77045	0.121559	Tada2a	0
ENSMUSG00000018654	ENSMUSG00000018654	Ikzf1	chr11:11685002-11772926	protein_coding	0.689983	0	1.18998	0.5	1.25094	Ikzf1	0
ENSMUSG00000018656	ENSMUSG00000018656	Fam115e	chr6:42584865-42597692	protein_coding	0	0	0.5	0.5	0	#N/A	0
ENSMUSG00000018659	ENSMUSG00000018659	Pnpo	chr11:96937824-96943986	protein_coding	3.13295	3.06505	3.63295	3.56505	0.0272192	Pnpo	0
ENSMUSG00000018661	ENSMUSG00000018661	Cog1	chr11:113649168-113667054	protein_coding	4.32677	1.55144	4.82677	2.05144	1.23442	Cog1	0
ENSMUSG00000018666	ENSMUSG00000018666	Cbx1	chr11:96789126-96808640	protein_coding	4.16349	1.48111	4.66349	1.98111	1.2351	Cbx1	0
ENSMUSG00000041438	ENSMUSG00000041438	Cirh1a	chr8:106893639-106923093	protein_coding	7.95251	0.356442	8.45251	0.856442	3.30295	Cirh1a	1
ENSMUSG00000027999	ENSMUSG00000027999	Pla2g12a	chr3:129878621-129895821	protein_coding	55.8068	5.20627	56.3068	5.70627	3.30269	Pla2g12a	1
ENSMUSG00000026739	ENSMUSG00000026739	Bmi1	chr2:18677017-18686629	protein_coding	8.69367	0.432197	9.19367	0.932197	3.30193	Bmi1	1
ENSMUSG00000079501	ENSMUSG00000079501	Gm5138	chr6:83874378-83875380		26.1525	2.20445	26.6525	2.70445	3.30086	#N/A	1
ENSMUSG00000018697	ENSMUSG00000018697	Aatf	chr11:84422854-84513522	protein_coding	1.79936	2.54727	2.29936	3.04727	-0.406285	Aatf	0
ENSMUSG00000018698	ENSMUSG00000018698	Lhx1	chr11:84517976-84526015	protein_coding	0	0	0.5	0.5	0	#N/A	0
ENSMUSG00000081249	ENSMUSG00000081249	Gm11517	chr11:96795438-96795825		18.8216	1.4607	19.3216	1.9607	3.30077	#N/A	1
ENSMUSG00000018727	ENSMUSG00000018727	Cpsf4l	chr11:113698171-113710017	protein_coding	0.321255	0	0.821255	0.5	0.715902	#N/A	0
ENSMUSG00000018733	ENSMUSG00000018733	Pex12	chr11:83294641-83302586	protein_coding	3.54109	0.0341854	4.04109	0.534185	2.91933	Pex12	0
ENSMUSG00000003380	ENSMUSG00000003380	Rabac1	chr7:24969749-24972728	protein_coding	20.5662	1.64032	21.0662	2.14032	3.29903	Rabac1	1
ENSMUSG00000039693	ENSMUSG00000039693	Msantd3	chr4:48539934-48561919	protein_coding	7.41055	0.303787	7.91055	0.803787	3.29889	Msantd3	1
ENSMUSG00000032116	ENSMUSG00000032116	Stt3a	chr9:36731274-36767679	protein_coding	24.8678	2.08278	25.3678	2.58278	3.296	Stt3a	1
ENSMUSG00000018752	ENSMUSG00000018752	BC096441	chr11:69682576-69696098	protein_coding	0.161009	0.0926384	0.661009	0.592638	0.157518	BC096441	0
ENSMUSG00000019849	ENSMUSG00000019849	Prep	chr10:45067205-45158997	protein_coding	7.54343	0.319151	8.04343	0.819151	3.29561	Prep	1
ENSMUSG00000024875	ENSMUSG00000024875	Yif1a	chr19:5088537-5092879	protein_coding	10.9579	0.666978	11.4579	1.16698	3.29549	Yif1a	1
ENSMUSG00000094257	ENSMUSG00000094257	Ap3s1-ps2	chr8:94405210-94405792		21.0513	1.69518	21.5513	2.19518	3.29536	#N/A	1
ENSMUSG00000018774	ENSMUSG00000018774	Cd68	chr11:69664212-69666153	protein_coding	2.43275	0.483231	2.93275	0.983231	1.57665	Cd68	0
ENSMUSG00000018776	ENSMUSG00000018776	Slc35g3	chr11:69759889-69761968	protein_coding	0.170699	0	0.670699	0.5	0.423737	#N/A	0
ENSMUSG00000049422	ENSMUSG00000049422	Chchd10	chr10:75935572-75937725	protein_coding	256.993	25.7371	257.493	26.2371	3.29485	Chchd10	1
ENSMUSG00000018800	ENSMUSG00000018800	Abca5	chr11:110269368-110337716	protein_coding	0.597357	0.529225	1.09736	1.02922	0.0924745	Abca5	0
ENSMUSG00000018809	ENSMUSG00000018809	Smyd4	chr11:75348432-75405705	protein_coding	1.22479	0.518999	1.72479	1.019	0.759268	Smyd4	0
ENSMUSG00000032009	ENSMUSG00000032009	Sesn3	chr9:14276300-14326138	protein_coding	4.76912	0.0371626	5.26912	0.537163	3.29413	Sesn3	1
ENSMUSG00000018820	ENSMUSG00000018820	Zfyve27	chr19:42163950-42194590	protein_coding	3.4019	2.83518	3.9019	3.33518	0.226412	Zfyve27	0
ENSMUSG00000018821	ENSMUSG00000018821	Avpi1	chr19:42123272-42129059	protein_coding	3.14515	0.249858	3.64515	0.749858	2.28129	Avpi1	0
ENSMUSG00000018822	ENSMUSG00000018822	Sfrp5	chr19:42197970-42202252	protein_coding	0	0	0.5	0.5	0	#N/A	0
ENSMUSG00000018830	ENSMUSG00000018830	Myh11	chr16:14194526-14291408	protein_coding	0.383767	0.0924962	0.883767	0.592496	0.57686	#N/A	0
ENSMUSG00000081600	ENSMUSG00000081600	Gm12286	chr11:63312309-63313311		9.69174	0.539547	10.1917	1.03955	3.29337	#N/A	1
ENSMUSG00000018844	ENSMUSG00000018844	Fndc8	chr11:82892123-82900801	protein_coding	0.0622181	0	0.562218	0.5	0.169202	#N/A	0
ENSMUSG00000018845	ENSMUSG00000018845	Unc45b	chr11:82910549-82943403	protein_coding	2.00458	0.177517	2.50458	0.677517	1.88624	Unc45b	0
ENSMUSG00000021037	ENSMUSG00000021037	Ahsa1	chr12:87266745-87273997	protein_coding	20.2356	1.62039	20.7356	2.12039	3.28971	Ahsa1	1
ENSMUSG00000081453	ENSMUSG00000081453	Gm6767	chr16:51362451-51363832		62.429	5.93985	62.929	6.43985	3.28863	#N/A	1
ENSMUSG00000018849	ENSMUSG00000018849	Wwc1	chr11:35838399-35980527	protein_coding	0	0	0.5	0.5	0	#N/A	0
ENSMUSG00000020464	ENSMUSG00000020464	Pnpt1	chr11:29130743-29161828	protein_coding	7.89275	0.359688	8.39275	0.859688	3.28726	Pnpt1	1
ENSMUSG00000018861	ENSMUSG00000018861	Fdxr	chr11:115268023-115277050	protein_coding	2.72568	1.38688	3.22568	1.88688	0.773601	Fdxr	0
ENSMUSG00000018862	ENSMUSG00000018862	Otop3	chr11:115334730-115346927	protein_coding	0	0	0.5	0.5	0	#N/A	0
[truncated: 36,398 more rows]

## Sheet: Rip_BAT
tracking_id	gene_id	gene_short_name	locus	protein_coding?	BAT_YBX2_FPKM	BAT_IgG_FPKM	BAT_YBX2_FPKM+0.5	BAT_IgG_FPKM+0.5	log(Ybx2/IgG,2)	background	IgG OR Ybx2>=5
ENSMUSG00000000003	ENSMUSG00000000003	Pbsn	chrX:77837900-77853623	protein_coding	0	0	0.1	0.1	0	#N/A	0
ENSMUSG00000010608	ENSMUSG00000010608	Rbm25	chr12:83632425-83633833	protein_coding	0	0	0.1	0.1	0	Rbm25	0
ENSMUSG00000022105	ENSMUSG00000022105	Rb1	chr14:73238545-73239786	protein_coding	0	0	0.1	0.1	0	Rb1	0
ENSMUSG00000064350	ENSMUSG00000064350	mt-Ty	chrM:5259-5326		4823.47	0	4823.97	0.5	13.236	#N/A	1
ENSMUSG00000000037	ENSMUSG00000000037	Scml2	chrX:161117192-161258213	protein_coding	0.0635804	0	0.1	0.1	0	#N/A	0
ENSMUSG00000000049	ENSMUSG00000000049	Apoh	chr11:108343353-108414396	protein_coding	0	0	0.1	0.1	0	#N/A	0
ENSMUSG00000024173	ENSMUSG00000024173	Tpsab1	chr17:25343244-25345562	protein_coding	0	0	0.1	0.1	0	Tpsab1	0
ENSMUSG00000027203	ENSMUSG00000027203	Dut	chr2:125247899-125249028	protein_coding	0	0	0.1	0.1	0	Dut	0
ENSMUSG00000028840	ENSMUSG00000028840	Zfp593	chr4:134243288-134245592	protein_coding	0.0319209	0	0.1	0.1	0	Zfp593	0
ENSMUSG00000032062	ENSMUSG00000032062	2310030G06Rik	chr9:50739690-50746521	protein_coding	0	0	0.1	0.1	0	2310030G06Rik	0
ENSMUSG00000032103	ENSMUSG00000032103	Pus3	chr9:35558594-35567183	protein_coding	0	0	0.1	0.1	0	Pus3	0
ENSMUSG00000000093	ENSMUSG00000000093	Tbx2	chr11:85832550-85841948	protein_coding	0.28849	0	0.28849	0.1	1.52852	Tbx2	0
ENSMUSG00000000094	ENSMUSG00000000094	Tbx4	chr11:85886421-85916097	protein_coding	0.0356745	0	0.1	0.1	0	#N/A	0
ENSMUSG00000000103	ENSMUSG00000000103	Zfy2	chrY:2106174-2170409	protein_coding	0	0	0.1	0.1	0	#N/A	0
ENSMUSG00000035183	ENSMUSG00000035183	Slc24a5	chr2:125068123-125088677	protein_coding	0	0	0.1	0.1	0	Slc24a5	0
ENSMUSG00000000125	ENSMUSG00000000125	Wnt3	chr11:103774149-103817957	protein_coding	0	0	0.1	0.1	0	#N/A	0
ENSMUSG00000000126	ENSMUSG00000000126	Wnt9a	chr11:59306927-59333552	protein_coding	0.260557	0.362666	0.260557	0.362666	-0.477042	Wnt9a	0
ENSMUSG00000000127	ENSMUSG00000000127	Fer	chr17:63896017-64139494	protein_coding	2.66161	0.281342	2.66161	0.281342	3.2419	#N/A	0
ENSMUSG00000041362	ENSMUSG00000041362	4930506M07Rik	chr19:58973357-59076069	protein_coding	0.0900512	0	0.1	0.1	0	4930506M07Rik	0
ENSMUSG00000045110	ENSMUSG00000045110	Rassf8	chr6:145819943-145821074	protein_coding	0.0308914	0	0.1	0.1	0	Rassf8	0
ENSMUSG00000000142	ENSMUSG00000000142	Axin2	chr11:108920348-108950783	protein_coding	1.05078	0	1.05078	0.1	3.39339	#N/A	0
ENSMUSG00000046110	ENSMUSG00000046110	Serinc4	chr2:121439058-121456781	protein_coding	0.0640942	0	0.1	0.1	0	Serinc4	0
ENSMUSG00000046447	ENSMUSG00000046447	Camk2n1	chr4:138454313-138460123	protein_coding	0.0549654	0	0.1	0.1	0	Camk2n1	0
ENSMUSG00000000154	ENSMUSG00000000154	Slc22a18	chr7:143473720-143499334	protein_coding	0.0954077	0	0.1	0.1	0	#N/A	0
ENSMUSG00000000157	ENSMUSG00000000157	Itgb2l	chr16:96422287-96443619	protein_coding	0	0	0.1	0.1	0	#N/A	0
ENSMUSG00000000159	ENSMUSG00000000159	Igsf5	chr16:96361667-96525580	protein_coding	0	0	0.1	0.1	0	#N/A	0
ENSMUSG00000000167	ENSMUSG00000000167	Pih1d2	chr9:50617320-50625000	protein_coding	0.755008	0	0.755008	0.1	2.91649	Pih1d2	0
ENSMUSG00000046814	ENSMUSG00000046814	Gchfr	chr2:119167772-119172390	protein_coding	0	0	0.1	0.1	0	Gchfr	0
ENSMUSG00000047011	ENSMUSG00000047011	Map4	chr9:110037288-110040467		1.36416e-147	0	0.1	0.1	0	Map4	0
ENSMUSG00000000182	ENSMUSG00000000182	Fgf23	chr6:127072901-127081408	protein_coding	0.0353895	0	0.1	0.1	0	#N/A	0
ENSMUSG00000000183	ENSMUSG00000000183	Fgf6	chr6:127015541-127024718	protein_coding	0	0	0.1	0.1	0	#N/A	0
ENSMUSG00000048107	ENSMUSG00000048107	Kctd12	chr14:102978219-102982528		0	0	0.1	0.1	0	Kctd12	0
ENSMUSG00000051412	ENSMUSG00000051412	Vamp7	GL456233.1:10737-39148	protein_coding	0	0	0.1	0.1	0	Vamp7	0
ENSMUSG00000000197	ENSMUSG00000000197	Nalcn	chr14:123276640-123627144	protein_coding	0	0	0.1	0.1	0	#N/A	0
ENSMUSG00000000202	ENSMUSG00000000202	Btbd17	chr11:114791216-114795945	protein_coding	0	0	0.1	0.1	0	#N/A	0
ENSMUSG00000000204	ENSMUSG00000000204	Slfn4	chr11:83175185-83190221	protein_coding	0.0138334	0	0.1	0.1	0	#N/A	0
ENSMUSG00000000214	ENSMUSG00000000214	Th	chr7:142892751-142931128	protein_coding	0	0	0.1	0.1	0	#N/A	0
ENSMUSG00000000215	ENSMUSG00000000215	Ins2	chr7:142678655-142699510	protein_coding	0	0	0.1	0.1	0	#N/A	0
ENSMUSG00000000216	ENSMUSG00000000216	Scnn1g	chr7:121734478-121768475	protein_coding	0	0	0.1	0.1	0	#N/A	0
ENSMUSG00000000223	ENSMUSG00000000223	Drp2	chrX:134404550-134456573	protein_coding	0.124592	0.00143889	0.124592	0.1	0.317211	#N/A	0
ENSMUSG00000000244	ENSMUSG00000000244	Tspan32	chr7:143005045-143019644	protein_coding	0	0	0.1	0.1	0	#N/A	0
ENSMUSG00000000247	ENSMUSG00000000247	Lhx2	chr2:38339280-38369733	protein_coding	0	0	0.1	0.1	0	#N/A	0
ENSMUSG00000000248	ENSMUSG00000000248	Clec2g	chr6:128934380-128984707	protein_coding	1.19883	0	1.19883	0.1	3.58356	#N/A	0
ENSMUSG00000053906	ENSMUSG00000053906	Mafg	chr11:120627680-120628181		1.94462e-25	0	0.1	0.1	0	Mafg	0
ENSMUSG00000000263	ENSMUSG00000000263	Glra1	chr11:55514237-55608198	protein_coding	0	0	0.1	0.1	0	#N/A	0
ENSMUSG00000055963	ENSMUSG00000055963	Triqk	chr4:12906837-12981471		0.0896537	0	0.1	0.1	0	Triqk	0
ENSMUSG00000072945	ENSMUSG00000072945	Ripply1	chrX:139779548-139782353	protein_coding	0.088653	0	0.1	0.1	0	Ripply1	0
ENSMUSG00000000276	ENSMUSG00000000276	Dgke	chr11:89035178-89066850	protein_coding	1.5356	0.0703146	1.5356	0.1	3.94073	Dgke	0
ENSMUSG00000073435	ENSMUSG00000073435	Nme3	chr17:24896499-24897522	protein_coding	7.08573e-284	0	0.1	0.1	0	Nme3	0
ENSMUSG00000073719	ENSMUSG00000073719	Vps13d	chr4:144972622-144974683	protein_coding	0	0	0.1	0.1	0	Vps13d	0
ENSMUSG00000000290	ENSMUSG00000000290	Itgb2	chr10:77530251-77565708	protein_coding	0.209102	0	0.209102	0.1	1.06421	Itgb2	0
ENSMUSG00000074199	ENSMUSG00000074199	Krtdap	chr7:30787904-30791083	protein_coding	0	0	0.1	0.1	0	Krtdap	0
ENSMUSG00000000296	ENSMUSG00000000296	Tpd52l1	chr10:31332379-31445921	protein_coding	0.84218	0	0.84218	0.1	3.07413	Tpd52l1	0
ENSMUSG00000078096	ENSMUSG00000078096	Golgb1	chr16:36875140-36875638	protein_coding	5.33854e-147	0	0.1	0.1	0	Golgb1	0
ENSMUSG00000000303	ENSMUSG00000000303	Cdh1	chr8:106603350-106670246	protein_coding	0.0137862	0	0.1	0.1	0	#N/A	0
ENSMUSG00000000305	ENSMUSG00000000305	Cdh4	chr2:179442430-179899373	protein_coding	0.209093	0	0.209093	0.1	1.06414	#N/A	0
ENSMUSG00000000308	ENSMUSG00000000308	Ckmt1	chr2:121357713-121363737	protein_coding	0	0	0.1	0.1	0	#N/A	0
ENSMUSG00000000317	ENSMUSG00000000317	Bcl6b	chr11:70224127-70229798	protein_coding	0.722914	0	0.722914	0.1	2.85382	Bcl6b	0
ENSMUSG00000000318	ENSMUSG00000000318	Clec10a	chr11:70156196-70170834	protein_coding	0.240141	0.00882246	0.240141	0.1	1.26388	Clec10a	0
ENSMUSG00000000320	ENSMUSG00000000320	Alox12	chr11:70241456-70255353	protein_coding	0.353853	1.26026	0.353853	1.26026	-1.8325	#N/A	0
ENSMUSG00000000325	ENSMUSG00000000325	Arvcf	chr16:18348181-18407076	protein_coding	1.15165	2.65752	1.15165	2.65752	-1.20638	Arvcf	0
ENSMUSG00000078173	ENSMUSG00000078173	Lenep	chr3:89400987-89402793	protein_coding	1.80605e-05	7.56215e-07	0.1	0.1	0	Lenep	0
ENSMUSG00000078284	ENSMUSG00000078284	Cdc73	chr1:143605161-143606608	protein_coding	1.98685e-50	0	0.1	0.1	0	Cdc73	0
ENSMUSG00000078561	ENSMUSG00000078561	Ebf1	chr11:44617316-44617773		1.31424e-32	0	0.1	0.1	0	Ebf1	0
ENSMUSG00000079102	ENSMUSG00000079102	Dab2	chr15:6329555-6337206	protein_coding	0	0	0.1	0.1	0	Dab2	0
ENSMUSG00000079834	ENSMUSG00000079834	Tmlhe	GL456233.1:159646-334183	protein_coding	0	0	0.1	0.1	0	Tmlhe	0
ENSMUSG00000000359	ENSMUSG00000000359	Rem1	chr2:152626950-152635198	protein_coding	0.270499	0	0.270499	0.1	1.43562	Rem1	0
ENSMUSG00000000365	ENSMUSG00000000365	Rnf17	chr14:56402696-56525032	protein_coding	0.0354236	0	0.1	0.1	0	#N/A	0
ENSMUSG00000086084	ENSMUSG00000086084	Hnrnpr	chr4:136343974-136345981		0	0	0.1	0.1	0	Hnrnpr	0
ENSMUSG00000090425	ENSMUSG00000090425	Efna5	chr17:62604291-62606707	protein_coding	2.50398e-05	0	0.1	0.1	0	Efna5	0
ENSMUSG00000000381	ENSMUSG00000000381	Wap	chr11:6635481-6638637	protein_coding	0	0.297976	0.1	0.297976	-1.5752	#N/A	0
ENSMUSG00000090483	ENSMUSG00000090483	Tmem29	chrX:150408583-150440905	protein_coding	8.47441e-34	0	0.1	0.1	0	Tmem29	0
ENSMUSG00000000385	ENSMUSG00000000385	Tmprss2	chr16:97564683-97611195	protein_coding	0	1.68014	0.1	1.68014	-4.07051	#N/A	0
ENSMUSG00000000386	ENSMUSG00000000386	Mx1	chr16:97447034-97462907	protein_coding	0.267314	0	0.267314	0.1	1.41854	#N/A	0
ENSMUSG00000000392	ENSMUSG00000000392	Fap	chr2:62500942-62574075	protein_coding	0.81494	0.0561115	0.81494	0.1	3.02669	Fap	0
ENSMUSG00000000394	ENSMUSG00000000394	Gcg	chr2:62474529-62483650	protein_coding	0	0	0.1	0.1	0	#N/A	0
ENSMUSG00000090697	ENSMUSG00000090697	Nsun4	chr4:116033906-116053380	protein_coding	2.30753e-139	0	0.1	0.1	0	Nsun4	0
ENSMUSG00000000402	ENSMUSG00000000402	Egfl6	chrX:166523006-166585720	protein_coding	0.0428323	0.020226	0.1	0.1	0	#N/A	0
ENSMUSG00000000409	ENSMUSG00000000409	Lck	chr4:129548343-129573641	protein_coding	0.232635	0	0.232635	0.1	1.21807	#N/A	0
ENSMUSG00000000411	ENSMUSG00000000411	Tssk3	chr4:129489013-129491022	protein_coding	0	0	0.1	0.1	0	#N/A	0
ENSMUSG00000000416	ENSMUSG00000000416	Cttnbp2	chr6:18366477-18515338	protein_coding	0	0	0.1	0.1	0	#N/A	0
ENSMUSG00000090796	ENSMUSG00000090796	Gm3141	chr14:43147486-43149893		0	0	0.1	0.1	0	Gm3141	0
ENSMUSG00000000435	ENSMUSG00000000435	Myf5	chr10:107482907-107486134	protein_coding	0	0	0.1	0.1	0	#N/A	0
ENSMUSG00000091854	ENSMUSG00000091854	Mier2	chr10:79540245-79541960	protein_coding	6.64228e-30	8.66911e-165	0.1	0.1	0	Mier2	0
ENSMUSG00000096951	ENSMUSG00000096951	PDPN	MG4136_PATCH:143267430-143299564	protein_coding	0	0	0.1	0.1	0	Pdpn	0
ENSMUSG00000096994	ENSMUSG00000096994	PPP1CA	MG153_PATCH:4192156-4195418	protein_coding	0	0	0.1	0.1	0	Ppp1ca	0
ENSMUSG00000000486	ENSMUSG00000000486	Sept1	chr7:127214446-127218498	protein_coding	1.1929	0	1.1929	0.1	3.5764	#N/A	0
ENSMUSG00000000489	ENSMUSG00000000489	Pdgfb	chr15:79995899-80014808	protein_coding	0.106511	0	0.106511	0.1	0.0910024	#N/A	0
ENSMUSG00000096998	ENSMUSG00000096998	CACNG7	MG4151_PATCH:3331470-3366732	protein_coding	0	0	0.1	0.1	0	Cacng7	0
ENSMUSG00000000531	ENSMUSG00000000531	Grasp	chr15:101224206-101232755	protein_coding	1.56977	1.38227	1.56977	1.38227	0.183514	Grasp	0
ENSMUSG00000097096	ENSMUSG00000097096	PITPNM1	MG153_PATCH:4099997-4113965	protein_coding	0	0	0.1	0.1	0	Pitpnm1	0
ENSMUSG00000097319	ENSMUSG00000097319	AIP	MG153_PATCH:4114445-4125858	protein_coding	0	0	0.1	0.1	0	Aip	0
ENSMUSG00000000544	ENSMUSG00000000544	Gpa33	chr1:166130237-166166510	protein_coding	0	0	0.1	0.1	0	#N/A	0
ENSMUSG00000097394	ENSMUSG00000097394	TMEM134	MG153_PATCH:4125959-4132306	protein_coding	0	0	0.1	0.1	0	Tmem134	0
ENSMUSG00000097485	ENSMUSG00000097485	CDK2AP2	MG153_PATCH:4097181-4099019	protein_coding	0	0	0.1	0.1	0	Cdk2ap2	0
ENSMUSG00000000560	ENSMUSG00000000560	Gabra2	chr5:70961056-71095849	protein_coding	0.0236591	0.00255793	0.1	0.1	0	#N/A	0
ENSMUSG00000097508	ENSMUSG00000097508	POLD4	MG153_PATCH:4231897-4233630	protein_coding	0	0	0.1	0.1	0	Pold4	0
ENSMUSG00000000562	ENSMUSG00000000562	Adora3	chr3:105870857-105908928	protein_coding	0	0	0.1	0.1	0	#N/A	0
ENSMUSG00000097721	ENSMUSG00000097721	RPS6KB2	MG153_PATCH:4156711-4163353	protein_coding	0	0	0.1	0.1	0	Rps6kb2	0
ENSMUSG00000000567	ENSMUSG00000000567	Sox9	chr11:112782223-112787760	protein_coding	0.592216	0	0.592216	0.1	2.56612	Sox9	0
ENSMUSG00000097771	ENSMUSG00000097771	CORO1B	MG153_PATCH:4148617-4154034	protein_coding	0	0	0.1	0.1	0	Coro1b	0
ENSMUSG00000097778	ENSMUSG00000097778	PRAMEF8	MG4136_PATCH:143412425-143421091	protein_coding	0	0	0.1	0.1	0	Pramef8	0
ENSMUSG00000097808	ENSMUSG00000097808	GSTP2	MG153_PATCH:4040350-4042165	protein_coding	0	0	0.1	0.1	0	Gstp2	0
ENSMUSG00000097829	ENSMUSG00000097829	MYADM	MG4151_PATCH:3289099-3298942	protein_coding	0	0	0.1	0.1	0	Myadm	0
ENSMUSG00000097830	ENSMUSG00000097830	GSTP1	MG153_PATCH:4035410-4037912	protein_coding	0	0	0.1	0.1	0	Gstp1	0
ENSMUSG00000097909	ENSMUSG00000097909	RAD9A	MG153_PATCH:4195196-4201602	protein_coding	0	0	0.1	0.1	0	Rad9a	0
ENSMUSG00000000606	ENSMUSG00000000606	Vmn2r88	chr14:51411000-51419527	protein_coding	0	0	0.1	0.1	0	#N/A	0
ENSMUSG00000000617	ENSMUSG00000000617	Grm6	chr11:50850684-50866208	protein_coding	0	0	0.1	0.1	0	#N/A	0
ENSMUSG00000000627	ENSMUSG00000000627	Sema4f	chr6:82911884-82939769	protein_coding	0.224594	0.0321499	0.224594	0.1	1.16732	Sema4f	0
ENSMUSG00000079488	ENSMUSG00000079488	Cd47	chr16:49913192-49915008		1.40127e-06	0.199179	0.1	0.199179	-0.994066	Cd47	0
ENSMUSG00000064829	ENSMUSG00000064829	Gm22879	chr2:26912230-26912287		2091.43	0	2091.93	0.5	12.0306	#N/A	1
ENSMUSG00000000632	ENSMUSG00000000632	Sez6	chr11:77930799-77979048	protein_coding	0.0226748	0	0.522675	0.5	0.0639855	#N/A	0
ENSMUSG00000000673	ENSMUSG00000000673	Haao	chr17:83831355-83846790	protein_coding	0.0548347	0	0.554835	0.5	0.15013	#N/A	0
ENSMUSG00000000682	ENSMUSG00000000682	Cd52	chr4:134082447-134095082	protein_coding	0	0	0.5	0.5	0	#N/A	0
ENSMUSG00000093769	ENSMUSG00000093769	Hist2h3c1	chr3:96246684-96248509	protein_coding	0.000236893	0.753451	0.500237	1.25345	-1.32522	Hist2h3c1	0
ENSMUSG00000000690	ENSMUSG00000000690	Hoxb6	chr11:96292475-96301568	protein_coding	1.40621	0.0610891	1.90621	0.561089	1.76441	Hoxb6	0
ENSMUSG00000000693	ENSMUSG00000000693	Loxl3	chr6:83034172-83052562	protein_coding	0.846817	0.518643	1.34682	1.01864	0.402905	Loxl3	0
ENSMUSG00000000701	ENSMUSG00000000701	Tcl1b5	chr12:105176357-105181143	protein_coding	0	0	0.5	0.5	0	#N/A	0
ENSMUSG00000000706	ENSMUSG00000000706	Btn1a1	chr13:23456991-23465901	protein_coding	0.0424336	0.0624049	0.542434	0.562405	-0.0521626	#N/A	0
ENSMUSG00000002274	ENSMUSG00000002274	Metrn	chr17:25794570-25797136	protein_coding	0	1.97417	0.5	2.47417	-2.30694	Metrn	0
ENSMUSG00000092828	ENSMUSG00000092828	Gm23160	chr17:70958038-70958121		1817.09	0	1817.59	0.5	11.8278	#N/A	1
ENSMUSG00000000724	ENSMUSG00000000724	Cryba1	chr11:77718614-77725283	protein_coding	0.0316515	0	0.531651	0.5	0.0885528	#N/A	0
ENSMUSG00000000730	ENSMUSG00000000730	Dnmt3l	chr10:78041946-78063622	protein_coding	0.244357	0	0.744357	0.5	0.574067	Dnmt3l	0
ENSMUSG00000000731	ENSMUSG00000000731	Aire	chr10:78030021-78043610	protein_coding	0.0031681	0.0407878	0.503168	0.540788	-0.104022	#N/A	0
ENSMUSG00000000732	ENSMUSG00000000732	Icosl	chr10:78069359-78079525	protein_coding	0.384602	0	0.884602	0.5	0.8231	Icosl	0
ENSMUSG00000093065	ENSMUSG00000093065	Gm23154	chr4:87432271-87432336		1217.92	0	1218.42	0.5	11.2508	#N/A	1
ENSMUSG00000022359	ENSMUSG00000022359	Wdyhv1	chr15:58141435-58158652	protein_coding	0.100355	0	0.600355	0.5	0.263888	Wdyhv1	0
ENSMUSG00000006638	ENSMUSG00000006638	Abhd1	chr5:30950065-30955091		0.101384	0	0.601384	0.5	0.266358	Abhd1	0
ENSMUSG00000000766	ENSMUSG00000000766	Oprm1	chr10:6758505-7038198	protein_coding	0	0	0.5	0.5	0	#N/A	0
ENSMUSG00000063623	ENSMUSG00000063623	C230062I16Rik	chr7:29953620-29955992	protein_coding	0.106096	0.0206463	0.606096	0.520646	0.219243	C230062I16Rik	0
ENSMUSG00000000782	ENSMUSG00000000782	Tcf7	chr11:52252370-52283014	protein_coding	0	0	0.5	0.5	0	#N/A	0
ENSMUSG00000035678	ENSMUSG00000035678	Tnfsf9	chr17:57105384-57107757	protein_coding	0.108861	0	0.608861	0.5	0.284185	Tnfsf9	0
ENSMUSG00000000791	ENSMUSG00000000791	Il12rb1	chr8:70808448-70821424	protein_coding	0	0	0.5	0.5	0	#N/A	0
ENSMUSG00000000792	ENSMUSG00000000792	Slc5a5	chr8:70882888-70892757	protein_coding	0.0212256	0	0.521226	0.5	0.0599798	#N/A	0
ENSMUSG00000000794	ENSMUSG00000000794	Kcnn3	chr3:89520163-89667761	protein_coding	0.190759	0	0.690759	0.5	0.466254	#N/A	0
ENSMUSG00000038607	ENSMUSG00000038607	Gng10	chr4:59035087-59041903	protein_coding	0.138814	1.41971	0.638814	1.91971	-1.58742	Gng10	0
ENSMUSG00000078546	ENSMUSG00000078546	2210404O09Rik	chr17:21879569-21908092	protein_coding	0.141685	0	0.641685	0.5	0.359937	2210404O09Rik	0
ENSMUSG00000039109	ENSMUSG00000039109	F13a1	chr13:36867177-37050244	protein_coding	0.143316	0.0930948	0.643316	0.593095	0.117265	F13a1	0
ENSMUSG00000000817	ENSMUSG00000000817	Fasl	chr1:161780690-161788495	protein_coding	0	0	0.5	0.5	0	#N/A	0
ENSMUSG00000035868	ENSMUSG00000035868	3110052M02Rik	chr17:21657581-21662540	protein_coding	0.166971	0	0.666971	0.5	0.415696	3110052M02Rik	0
ENSMUSG00000075266	ENSMUSG00000075266	Cenpw	chr10:30196010-30200540	protein_coding	0.173075	0	0.673075	0.5	0.428839	Cenpw	0
ENSMUSG00000078317	ENSMUSG00000078317	F8a	chrX:73228305-73230795	protein_coding	0.176326	1.32381	0.676326	1.82381	-1.43116	F8a	0
ENSMUSG00000023963	ENSMUSG00000023963	Cyp39a1	chr17:43667424-43751431	protein_coding	0.18282	0	0.68282	0.5	0.449577	Cyp39a1	0
ENSMUSG00000000861	ENSMUSG00000000861	Bcl11a	chr11:24078055-24174123	protein_coding	0.137802	0	0.637802	0.5	0.351181	#N/A	0
ENSMUSG00000000869	ENSMUSG00000000869	Il4	chr11:53602981-53618669	protein_coding	0.149026	0	0.649026	0.5	0.376348	#N/A	0
ENSMUSG00000047907	ENSMUSG00000047907	Tshz2	chr2:169633012-170071816	protein_coding	0.191292	0	0.691292	0.5	0.467367	Tshz2	0
ENSMUSG00000021707	ENSMUSG00000021707	Dhfr	chr13:92354782-92389053	protein_coding	0.192441	0.014561	0.692441	0.514561	0.428349	Dhfr	0
ENSMUSG00000000884	ENSMUSG00000000884	Gnb1l	chr16:18498767-18566679	protein_coding	0.558535	0.479402	1.05854	0.979402	0.112096	Gnb1l	0
ENSMUSG00000000889	ENSMUSG00000000889	Dbh	chr2:27165232-27183200	protein_coding	0	0	0.5	0.5	0	#N/A	0
ENSMUSG00000079615	ENSMUSG00000079615	Hspa14	chr2:3504528-3512759	protein_coding	0.196947	0	0.696947	0.5	0.479121	Hspa14	0
ENSMUSG00000014813	ENSMUSG00000014813	Stc1	chr14:69029288-69041401	protein_coding	0.197019	0	0.697019	0.5	0.47927	Stc1	0
ENSMUSG00000000903	ENSMUSG00000000903	Vpreb3	chr10:75943056-75949657	protein_coding	0.245946	0	0.745946	0.5	0.577143	Vpreb3	0
ENSMUSG00000092687	ENSMUSG00000092687	Gm25744	chr17:34952012-34952075		1100.91	8.58516e-36	1101.41	0.5	11.1051	#N/A	1
ENSMUSG00000007646	ENSMUSG00000007646	Rad51c	chr11:87376644-87404954	protein_coding	0.198585	0.0491285	0.698585	0.549129	0.347292	Rad51c	0
ENSMUSG00000028972	ENSMUSG00000028972	Car6	chr4:150187014-150201332	protein_coding	0.201601	0	0.701601	0.5	0.488723	Car6	0
ENSMUSG00000000938	ENSMUSG00000000938	Hoxa10	chr6:52231196-52240854	protein_coding	0	0	0.5	0.5	0	#N/A	0
ENSMUSG00000009876	ENSMUSG00000009876	Cox4i2	chr2:152754172-152765037	protein_coding	0.202767	0	0.702767	0.5	0.491118	Cox4i2	0
ENSMUSG00000020778	ENSMUSG00000020778	Ten1	chr11:116198854-116215318	protein_coding	0.205016	0.00294994	0.705016	0.50295	0.487241	Ten1	0
ENSMUSG00000032666	ENSMUSG00000032666	1700025G04Rik	chr1:151884523-152090320	protein_coding	0.205518	0.0652794	0.705518	0.565279	0.319719	1700025G04Rik	0
ENSMUSG00000000958	ENSMUSG00000000958	Slc7a7	chr14:54369443-54409472	protein_coding	1.24228	0.747882	1.74228	1.24788	0.481495	Slc7a7	0
ENSMUSG00000021367	ENSMUSG00000021367	Edn1	chr13:42301269-42307989	protein_coding	0.214892	0	0.714892	0.5	0.515797	Edn1	0
ENSMUSG00000024232	ENSMUSG00000024232	Bambi	chr18:3507956-3516404	protein_coding	0.217231	0	0.717231	0.5	0.52051	Bambi	0
ENSMUSG00000000982	ENSMUSG00000000982	Ccl3	chr11:83647843-83649355	protein_coding	0	0	0.5	0.5	0	#N/A	0
ENSMUSG00000000983	ENSMUSG00000000983	Wfdc18	chr11:83709014-83711348	protein_coding	0	0	0.5	0.5	0	#N/A	0
ENSMUSG00000001014	ENSMUSG00000001014	Icam4	chr9:21029372-21030531	protein_coding	0.0774902	0	0.57749	0.5	0.207868	#N/A	0
ENSMUSG00000020492	ENSMUSG00000020492	Ska2	chr11:87109233-87124635	protein_coding	0.218833	0	0.718833	0.5	0.523729	Ska2	0
ENSMUSG00000057265	ENSMUSG00000057265	Ccdc176	chr12:84409070-84433780	protein_coding	0.231413	0	0.731413	0.5	0.548758	Ccdc176	0
ENSMUSG00000071266	ENSMUSG00000071266	Zfp946	chr17:22424221-22456689	protein_coding	0.237747	0	0.737747	0.5	0.561198	Zfp946	0
ENSMUSG00000091609	ENSMUSG00000091609	Acer2	chr4:86930690-86934820	protein_coding	0.244655	0	0.744655	0.5	0.574644	Acer2	0
ENSMUSG00000001021	ENSMUSG00000001021	S100a3	chr3:90600214-90602702	protein_coding	0.104121	0	0.604121	0.5	0.272909	#N/A	0
ENSMUSG00000001023	ENSMUSG00000001023	S100a5	chr3:90608522-90611780	protein_coding	0	0	0.5	0.5	0	#N/A	0
ENSMUSG00000004791	ENSMUSG00000004791	Pgf	chr12:85166638-85177296	protein_coding	0.246608	0	0.746608	0.5	0.578423	Pgf	0
ENSMUSG00000001027	ENSMUSG00000001027	Scn4a	chr11:106318591-106349389	protein_coding	0	0	0.5	0.5	0	#N/A	0
ENSMUSG00000001027	ENSMUSG00000001027	Scn4a	chr11:106349454-106353288	protein_coding	0	0	0.5	0.5	0	#N/A	0
ENSMUSG00000001029	ENSMUSG00000001029	Icam2	chr11:106377655-106388075	protein_coding	0.180986	0	0.680986	0.5	0.445697	Icam2	0
ENSMUSG00000001034	ENSMUSG00000001034	Mapk7	chr11:61488811-61494406	protein_coding	1.4502	0	1.9502	0.5	1.96362	Mapk7	0
ENSMUSG00000049670	ENSMUSG00000049670	Morn4	chr19:42074938-42086370	protein_coding	0.24743	0	0.74743	0.5	0.58001	Morn4	0
ENSMUSG00000001039	ENSMUSG00000001039	B9d1	chr11:61505143-61512931	protein_coding	0.681999	0	1.182	0.5	1.24123	B9d1	0
ENSMUSG00000050777	ENSMUSG00000050777	Tmem37	chr1:120067376-120074074	protein_coding	0.253253	0	0.753253	0.5	0.591206	Tmem37	0
ENSMUSG00000001053	ENSMUSG00000001053	N4bp3	chr11:51643062-51650842	protein_coding	0.265836	1.39675	0.765836	1.89675	-1.30842	N4bp3	0
ENSMUSG00000056643	ENSMUSG00000056643	Chst13	chr6:90308350-90325185	protein_coding	0.274531	0	0.774531	0.5	0.631395	Chst13	0
ENSMUSG00000020325	ENSMUSG00000020325	Fstl3	chr10:79777271-79782630	protein_coding	0.274656	0	0.774656	0.5	0.631628	Fstl3	0
ENSMUSG00000001076	ENSMUSG00000001076	C1ql4	chr15:99084685-99087817	protein_coding	0	0	0.5	0.5	0	#N/A	0
ENSMUSG00000006218	ENSMUSG00000006218	Fam131c	chr4:141368219-141384175	protein_coding	0.275127	0	0.775127	0.5	0.632505	Fam131c	0
ENSMUSG00000018405	ENSMUSG00000018405	Mrm1	chr11:84813060-84819515	protein_coding	0.278628	0	0.778628	0.5	0.639006	Mrm1	0
ENSMUSG00000001095	ENSMUSG00000001095	Slc13a2	chr11:78397086-78422217	protein_coding	0.026056	0	0.526056	0.5	0.0732883	#N/A	0
ENSMUSG00000023828	ENSMUSG00000023828	Slc22a3	chr17:12419971-12507704	protein_coding	0.281632	0	0.781632	0.5	0.644561	Slc22a3	0
ENSMUSG00000046567	ENSMUSG00000046567	4930430F08Rik	chr10:100572273-100589259	protein_coding	0.285734	0	0.785734	0.5	0.652113	4930430F08Rik	0
ENSMUSG00000001103	ENSMUSG00000001103	Sebox	chr11:78503448-78505081	protein_coding	0	0	0.5	0.5	0	#N/A	0
ENSMUSG00000003198	ENSMUSG00000003198	Zfp959	chr17:55892183-55898584	protein_coding	0.290053	0	0.790053	0.5	0.660021	Zfp959	0
ENSMUSG00000020024	ENSMUSG00000020024	Ccdc41	chr10:94688789-94790336	protein_coding	0.291093	0	0.791093	0.5	0.661919	Ccdc41	0
ENSMUSG00000006777	ENSMUSG00000006777	Krt23	chr11:99477973-99493137	protein_coding	0.291153	0	0.791153	0.5	0.662029	Krt23	0
ENSMUSG00000079600	ENSMUSG00000079600	Gm17604	chrX:165003764-165004829	protein_coding	547.261	0	547.761	0.5	10.0974	#N/A	1
ENSMUSG00000098188	ENSMUSG00000098188	SOWAHC	chr10:59221952-59226434	protein_coding	0.295437	0.610368	0.795437	1.11037	-0.481218	Sowahc	0
ENSMUSG00000001128	ENSMUSG00000001128	Cfp	chrX:20925453-20931555	protein_coding	0.633901	0	1.1339	0.5	1.18129	Cfp	0
ENSMUSG00000060244	ENSMUSG00000060244	Alyref2	chr1:171503477-171504750	protein_coding	0.296686	0	0.796686	0.5	0.672083	Alyref2	0
ENSMUSG00000059897	ENSMUSG00000059897	Zfp930	chr8:69226342-69228980	protein_coding	0.300809	0	0.800809	0.5	0.67953	Zfp930	0
ENSMUSG00000056836	ENSMUSG00000056836	Gm6851	chr7:40190908-40191346		0.301916	0	0.801916	0.5	0.681523	Gm6851	0
ENSMUSG00000048416	ENSMUSG00000048416	Mlf1	chr3:67374096-67400003	protein_coding	0.304877	0	0.804877	0.5	0.68684	Mlf1	0
ENSMUSG00000021928	ENSMUSG00000021928	Ebpl	chr14:61339762-61360445	protein_coding	0.30573	0	0.80573	0.5	0.688368	Ebpl	0
ENSMUSG00000001151	ENSMUSG00000001151	Pcnt	chr10:76351253-76442912	protein_coding	0.868688	0.233553	1.36869	0.733553	0.899821	Pcnt	0
ENSMUSG00000001155	ENSMUSG00000001155	Ftcd	chr10:76575647-76590338	protein_coding	0	0	0.5	0.5	0	#N/A	0
ENSMUSG00000056671	ENSMUSG00000056671	Prelid2	chr18:41875695-41951194	protein_coding	0.305893	0	0.805893	0.5	0.68866	Prelid2	0
ENSMUSG00000089756	ENSMUSG00000089756	Gm8898	chr2:175918880-175931100	protein_coding	0.312954	0.0470634	0.812954	0.547063	0.571466	Gm8898	0
ENSMUSG00000046753	ENSMUSG00000046753	Ccdc66	chr14:27482411-27508460	protein_coding	0.317018	0	0.817018	0.5	0.70844	Ccdc66	0
ENSMUSG00000001166	ENSMUSG00000001166	Oas1c	chr5:120800193-120812514	protein_coding	0.970902	0	1.4709	0.5	1.5567	#N/A	0
ENSMUSG00000001168	ENSMUSG00000001168	Oas1h	chr5:120861420-120873512	protein_coding	0	0	0.5	0.5	0	#N/A	0
ENSMUSG00000059839	ENSMUSG00000059839	Zfp874b	chr13:67471513-67484225	protein_coding	0.317159	0	0.817159	0.5	0.708689	Zfp874b	0
ENSMUSG00000034520	ENSMUSG00000034520	Gjc1	chr11:102799578-102819700	protein_coding	0.31735	0	0.81735	0.5	0.709026	Gjc1	0
ENSMUSG00000020077	ENSMUSG00000020077	Srgn	chr10:62493832-62527451	protein_coding	0.318702	0.145042	0.818702	0.645042	0.343945	Srgn	0
ENSMUSG00000001225	ENSMUSG00000001225	Slc26a3	chr12:31390870-31473917	protein_coding	0.266346	0	0.766346	0.5	0.616068	#N/A	0
ENSMUSG00000023911	ENSMUSG00000023911	Flywch2	chr17:23776915-23786081	protein_coding	0.322593	0	0.822593	0.5	0.718251	Flywch2	0
ENSMUSG00000001228	ENSMUSG00000001228	Uhrf1	chr17:56303320-56323486	protein_coding	1.61223	0.372264	2.11223	0.872264	1.27593	Uhrf1	0
ENSMUSG00000053178	ENSMUSG00000053178	Gm9897	chr5:4192366-4197651	protein_coding	0.329987	0	0.829987	0.5	0.731161	Gm9897	0
ENSMUSG00000038425	ENSMUSG00000038425	Poli	chr18:70508679-70530620	protein_coding	0.33906	0.0308479	0.83906	0.530848	0.660475	Poli	0
ENSMUSG00000001247	ENSMUSG00000001247	Lsr	chr7:30957776-30983169	protein_coding	0.156357	0	0.656357	0.5	0.392553	Lsr	0
ENSMUSG00000067878	ENSMUSG00000067878	Mtap7d3	chrX:56797857-56822326	protein_coding	0.344186	0	0.844186	0.5	0.755633	Mtap7d3	0
ENSMUSG00000001249	ENSMUSG00000001249	Hpn	chr7:31098724-31115290	protein_coding	0.298052	0	0.798052	0.5	0.674555	#N/A	0
ENSMUSG00000001260	ENSMUSG00000001260	Gabrg1	chr5:70751046-70842617	protein_coding	0	0	0.5	0.5	0	#N/A	0
ENSMUSG00000001270	ENSMUSG00000001270	Ckb	chr12:111669354-111672338	protein_coding	1.94951	0	2.44951	0.5	2.29249	Ckb	0
ENSMUSG00000040258	ENSMUSG00000040258	Nxph4	chr10:127525472-127534559	protein_coding	0.347433	0.299875	0.847433	0.799875	0.0833247	Nxph4	0
ENSMUSG00000001281	ENSMUSG00000001281	Itgb7	chr15:102215994-102231935	protein_coding	0.0233571	0	0.523357	0.5	0.0658676	#N/A	0
ENSMUSG00000073465	ENSMUSG00000073465	Park2	chr17:10840391-10940963	protein_coding	0.356893	0	0.856893	0.5	0.777187	Park2	0
ENSMUSG00000048834	ENSMUSG00000048834	Vstm2a	chr11:16257723-16427310	protein_coding	0.359858	0	0.859858	0.5	0.78217	Vstm2a	0
ENSMUSG00000036022	ENSMUSG00000036022	Fam122b	chrX:53243414-53269805	protein_coding	0.360561	0	0.860561	0.5	0.783349	Fam122b	0
ENSMUSG00000001300	ENSMUSG00000001300	Efnb2	chr8:8617433-8660773	protein_coding	0.551302	0	1.0513	0.5	1.07218	Efnb2	0
ENSMUSG00000014075	ENSMUSG00000014075	Tctex1d2	chr16:32419701-32429099	protein_coding	0.361179	1.59809	0.861179	2.09809	-1.28469	Tctex1d2	0
ENSMUSG00000031465	ENSMUSG00000031465	Angpt2	chr8:18690262-18741562	protein_coding	0.363469	0.156962	0.863469	0.656962	0.394334	Angpt2	0
ENSMUSG00000056383	ENSMUSG00000056383	AI987944	chr7:41373771-41393260	protein_coding	0.363947	0	0.863947	0.5	0.789015	AI987944	0
ENSMUSG00000001333	ENSMUSG00000001333	Sync	chr4:129287616-129308559	protein_coding	0.311369	0.00263016	0.811369	0.50263	0.690861	Sync	0
ENSMUSG00000001334	ENSMUSG00000001334	Fndc5	chr4:129136998-129144593	protein_coding	0.338447	0	0.838447	0.5	0.745791	Fndc5	0
ENSMUSG00000001520	ENSMUSG00000001520	Nrip2	chr6:128399295-128408932	protein_coding	0.371217	0.00184697	0.871217	0.501847	0.795785	Nrip2	0
ENSMUSG00000001349	ENSMUSG00000001349	Cnn1	chr9:22099280-22109630	protein_coding	0	0	0.5	0.5	0	#N/A	0
ENSMUSG00000032551	ENSMUSG00000032551	1110059G10Rik	chr9:122945088-122951000	protein_coding	0.372504	0.107383	0.872504	0.607383	0.522555	1110059G10Rik	0
ENSMUSG00000027456	ENSMUSG00000027456	Sdcbp2	chr2:151572621-151590005	protein_coding	0.376779	0	0.876779	0.5	0.810285	Sdcbp2	0
ENSMUSG00000003849	ENSMUSG00000003849	Nqo1	chr8:107388224-107403206	protein_coding	0.377529	0	0.877529	0.5	0.811519	Nqo1	0
ENSMUSG00000030051	ENSMUSG00000030051	Aplf	chr6:87628428-87672168	protein_coding	0.377664	0.58761	0.877664	1.08761	-0.309421	Aplf	0
ENSMUSG00000036977	ENSMUSG00000036977	Anapc10	chr8:79711819-79777321	protein_coding	0.377944	0	0.877944	0.5	0.812201	Anapc10	0
ENSMUSG00000078667	ENSMUSG00000078667	1700094D03Rik	chr3:90062795-90068347	protein_coding	0.381393	0.116953	0.881393	0.616953	0.514625	1700094D03Rik	0
ENSMUSG00000036111	ENSMUSG00000036111	Lmo1	chr7:109138571-109170308	protein_coding	0.382634	0	0.882634	0.5	0.819887	Lmo1	0
ENSMUSG00000057069	ENSMUSG00000057069	Ero1lb	chr13:12565882-12609526	protein_coding	0.389783	0	0.889783	0.5	0.831525	Ero1lb	0
ENSMUSG00000001417	ENSMUSG00000001417	Rhbg	chr3:88242873-88287210	protein_coding	0	0	0.5	0.5	0	#N/A	0
ENSMUSG00000028838	ENSMUSG00000028838	Extl1	chr4:134356371-134383850	protein_coding	0.391019	3.18802	0.891019	3.68802	-2.04932	Extl1	0
ENSMUSG00000036887	ENSMUSG00000036887	C1qa	chr4:136895916-136898803	protein_coding	0.395881	0	0.895881	0.5	0.841379	C1qa	0
ENSMUSG00000029490	ENSMUSG00000029490	Mfsd7a	chr5:108441053-108448891	protein_coding	0.399962	0	0.899962	0.5	0.847936	Mfsd7a	0
ENSMUSG00000026639	ENSMUSG00000026639	Lamb3	chr1:193301956-193343878	protein_coding	0.400586	0	0.900586	0.5	0.848936	Lamb3	0
ENSMUSG00000030111	ENSMUSG00000030111	A2m	chr6:121636172-121679237	protein_coding	0.404708	0	0.904708	0.5	0.855524	A2m	0
ENSMUSG00000041696	ENSMUSG00000041696	Rasl12	chr9:65398487-65414853	protein_coding	0.405776	0	0.905776	0.5	0.857226	Rasl12	0
ENSMUSG00000031303	ENSMUSG00000031303	Map3k15	chrX:159988432-160123351	protein_coding	0.4076	0	0.9076	0.5	0.860129	Map3k15	0
ENSMUSG00000084113	ENSMUSG00000084113	Gm14277	chr2:157168819-157169179		0.41057	0	0.91057	0.5	0.864842	Gm14277	0
ENSMUSG00000001444	ENSMUSG00000001444	Tbx21	chr11:97098070-97115331	protein_coding	0	0	0.5	0.5	0	#N/A	0
ENSMUSG00000028576	ENSMUSG00000028576	Ift74	chr4:94614490-94693229	protein_coding	0.414717	0.0731618	0.914717	0.573162	0.674383	Ift74	0
ENSMUSG00000031242	ENSMUSG00000031242	2610002M06Rik	chrX:107782750-107816334	protein_coding	0.414783	0	0.914783	0.5	0.871501	2610002M06Rik	0
ENSMUSG00000044407	ENSMUSG00000044407	Qk	chr17:10319944-10320229	protein_coding	0.415498	0	0.915498	0.5	0.872629	Qk	0
ENSMUSG00000001493	ENSMUSG00000001493	Meox1	chr11:101877509-101894374	protein_coding	0.0567143	0	0.556714	0.5	0.155009	#N/A	0
ENSMUSG00000001494	ENSMUSG00000001494	Sost	chr11:101962457-101967015	protein_coding	0	0	0.5	0.5	0	#N/A	0
ENSMUSG00000001496	ENSMUSG00000001496	Nkx2-1	chr12:56531957-56536908	protein_coding	0.0866695	0	0.586669	0.5	0.23062	#N/A	0
ENSMUSG00000001497	ENSMUSG00000001497	Pax9	chr12:56691766-56712822	protein_coding	0.0235028	0.012885	0.523503	0.512885	0.0295619	#N/A	0
ENSMUSG00000039405	ENSMUSG00000039405	Prss23	chr7:89507784-89517586	protein_coding	0.421804	0	0.921804	0.5	0.882532	Prss23	0
ENSMUSG00000056367	ENSMUSG00000056367	Actr3b	chr5:25759996-25850342	protein_coding	0.421857	0	0.921857	0.5	0.882615	Actr3b	0
ENSMUSG00000001507	ENSMUSG00000001507	Itga3	chr11:95044473-95076801	protein_coding	2.51135	0.531569	3.01135	1.03157	1.54557	Itga3	0
ENSMUSG00000001508	ENSMUSG00000001508	Sgca	chr11:94962790-94976327	protein_coding	0.0460174	0	0.546017	0.5	0.127019	#N/A	0
ENSMUSG00000001510	ENSMUSG00000001510	Dlx3	chr11:95120088-95125296	protein_coding	0.0948152	0	0.594815	0.5	0.250513	#N/A	0
ENSMUSG00000001517	ENSMUSG00000001517	Foxm1	chr6:128362966-128375893	protein_coding	0.629294	0	1.12929	0.5	1.17542	#N/A	0
ENSMUSG00000037086	ENSMUSG00000037086	1110059M19Rik	chrX:45090903-45092791	protein_coding	0.428373	0	0.928373	0.5	0.892776	1110059M19Rik	0
ENSMUSG00000095795	ENSMUSG00000095795	Park2	chr17:11838601-11867561	protein_coding	0.429262	0	0.929262	0.5	0.894157	Park2	0
ENSMUSG00000096910	ENSMUSG00000096910	Zfp955b	chr17:33289648-33303196	protein_coding	0.435161	0	0.935161	0.5	0.903287	Zfp955b	0
ENSMUSG00000040675	ENSMUSG00000040675	Mthfd1l	chr10:3973117-4167081	protein_coding	0.43627	0	0.93627	0.5	0.904997	Mthfd1l	0
ENSMUSG00000019732	ENSMUSG00000019732	Calr3	chr8:72424175-72443870	protein_coding	0.436445	0	0.936445	0.5	0.905266	Calr3	0
ENSMUSG00000002266	ENSMUSG00000002266	Zim1	chr7:6675442-6696450	protein_coding	0.437104	0	0.937104	0.5	0.906281	Zim1	0
ENSMUSG00000035274	ENSMUSG00000035274	Tpbg	chr9:85842379-85847055	protein_coding	0.442239	0.0684387	0.942239	0.568439	0.729088	Tpbg	0
ENSMUSG00000029366	ENSMUSG00000029366	Dck	chr5:88764995-88783281	protein_coding	0.443086	1.76561	0.943086	2.26561	-1.26444	Dck	0
ENSMUSG00000001558	ENSMUSG00000001558	Klhl10	chr11:100441916-100457022	protein_coding	0.0631054	0	0.563105	0.5	0.171477	#N/A	0
ENSMUSG00000001566	ENSMUSG00000001566	Mnx1	chr5:29473037-29478519	protein_coding	0	0	0.5	0.5	0	#N/A	0
ENSMUSG00000040429	ENSMUSG00000040429	Mterf	chr5:3890580-3893933	protein_coding	0.44466	2.04652	0.94466	2.54652	-1.43066	Mterf	0
ENSMUSG00000020669	ENSMUSG00000020669	Sh3yl1	chr12:30911667-30960162	protein_coding	0.447171	0	0.947171	0.5	0.921697	Sh3yl1	0
ENSMUSG00000001583	ENSMUSG00000001583	Tnk1	chr11:69851004-69858730	protein_coding	0.0349408	0.0416555	0.534941	0.541655	-0.0179963	#N/A	0
ENSMUSG00000001588	ENSMUSG00000001588	Acap1	chr11:69881566-69895539	protein_coding	0	0	0.5	0.5	0	#N/A	0
ENSMUSG00000001604	ENSMUSG00000001604	Tcea3	chr4:136247728-136274898	protein_coding	0.943513	3.03314	1.44351	3.53314	-1.29137	#N/A	0
ENSMUSG00000001622	ENSMUSG00000001622	Csn3	chr5:87925578-87932665	protein_coding	0.0616881	0.077829	0.561688	0.577829	-0.0408734	#N/A	0
ENSMUSG00000027811	ENSMUSG00000027811	4930579G24Rik	chr3:79629078-79632817	protein_coding	0.447373	0.0661743	0.947373	0.566174	0.742686	4930579G24Rik	0
ENSMUSG00000029484	ENSMUSG00000029484	Anxa3	chr5:96793384-96845968	protein_coding	0.447446	0	0.947446	0.5	0.922116	Anxa3	0
ENSMUSG00000074227	ENSMUSG00000074227	Spint2	chr7:29256330-29281977	protein_coding	0.448167	0	0.948167	0.5	0.923213	Spint2	0
ENSMUSG00000027160	ENSMUSG00000027160	Ccdc34	chr2:110017816-110173360	protein_coding	0.448351	0	0.948351	0.5	0.923493	Ccdc34	0
ENSMUSG00000001655	ENSMUSG00000001655	Hoxc13	chr15:102921102-102928814	protein_coding	0	0	0.5	0.5	0	#N/A	0
ENSMUSG00000001656	ENSMUSG00000001656	Hoxc11	chr15:102954426-102957708	protein_coding	0	0	0.5	0.5	0	#N/A	0
ENSMUSG00000032740	ENSMUSG00000032740	Ccdc88a	chr11:29373657-29510808	protein_coding	0.452102	0	0.952102	0.5	0.929188	Ccdc88a	0
ENSMUSG00000051147	ENSMUSG00000051147	Nat2	chr8:67494866-67502580	protein_coding	0.454668	0	0.954668	0.5	0.933071	Nat2	0
ENSMUSG00000001663	ENSMUSG00000001663	Gstt1	chr10:75783812-75798584	protein_coding	0.331012	0	0.831012	0.5	0.732941	Gstt1	0
ENSMUSG00000001665	ENSMUSG00000001665	Gstt3	chr10:75774114-75781414	protein_coding	0.746823	0	1.24682	0.5	1.31826	Gstt3	0
ENSMUSG00000064371	ENSMUSG00000064371	mt-Tt	chrM:15288-15355		542.641	0	543.141	0.5	10.0852	#N/A	1
ENSMUSG00000001670	ENSMUSG00000001670	Tat	chr8:109990436-109999803	protein_coding	0	0	0.5	0.5	0	#N/A	0
ENSMUSG00000001672	ENSMUSG00000001672	Marveld3	chr8:109947913-109962203	protein_coding	0	0	0.5	0.5	0	#N/A	0
ENSMUSG00000050288	ENSMUSG00000050288	Fzd2	chr11:102604430-102608058	protein_coding	0.457928	0	0.957928	0.5	0.937989	Fzd2	0
ENSMUSG00000072623	ENSMUSG00000072623	Zfp9	chr6:118461949-118479320	protein_coding	0.460446	0	0.960446	0.5	0.941776	Zfp9	0
ENSMUSG00000056025	ENSMUSG00000056025	Clca1	chr3:144729676-144760977	protein_coding	0.46153	0.0119214	0.96153	0.511921	0.90941	Clca1	0
ENSMUSG00000076437	ENSMUSG00000076437	2700094K13Rik	chr2:84669217-84670770	protein_coding	0.465733	0	0.965733	0.5	0.949696	2700094K13Rik	0
ENSMUSG00000029725	ENSMUSG00000029725	Ppp1r35	chr5:137778848-137780110	protein_coding	0.466638	0	0.966638	0.5	0.951048	Ppp1r35	0
ENSMUSG00000047473	ENSMUSG00000047473	Zfp30	chr7:29783997-29794702	protein_coding	0.468319	0	0.968319	0.5	0.953554	Zfp30	0
ENSMUSG00000001741	ENSMUSG00000001741	Il16	chr7:83642847-83745726	protein_coding	0.221713	0.186991	0.721713	0.686991	0.071134	#N/A	0
ENSMUSG00000070369	ENSMUSG00000070369	Itgad	chr7:128154375-128223816	protein_coding	0.469743	0.311245	0.969743	0.811245	0.257465	Itgad	0
ENSMUSG00000032375	ENSMUSG00000032375	Aph1b	chr9:66775201-66795490	protein_coding	0.483503	0.0241781	0.983503	0.524178	0.907872	Aph1b	0
ENSMUSG00000044501	ENSMUSG00000044501	Zfp758	chr17:22361452-22377281	protein_coding	0.483817	0.0422971	0.983817	0.542297	0.859307	Zfp758	0
ENSMUSG00000050668	ENSMUSG00000050668	Gpatch11	chr17:78835515-78848299	protein_coding	0.4839	0.111589	0.9839	0.611589	0.685949	Gpatch11	0
ENSMUSG00000001763	ENSMUSG00000001763	Tspan33	chr6:29694221-29718559	protein_coding	0.343333	0	0.843333	0.5	0.754174	Tspan33	0
ENSMUSG00000067942	ENSMUSG00000067942	Zfp160	chr17:21008940-21028852	protein_coding	0.486064	0	0.986064	0.5	0.979753	Zfp160	0
ENSMUSG00000021411	ENSMUSG00000021411	Pxdc1	chr13:34627839-34652681	protein_coding	0.487196	0.0667379	0.987196	0.566738	0.800655	Pxdc1	0
ENSMUSG00000028278	ENSMUSG00000028278	Rragd	chr4:32983036-33022180	protein_coding	0.488555	0.044169	0.988555	0.544169	0.861266	Rragd	0
ENSMUSG00000057409	ENSMUSG00000057409	Zfp53	chr17:21491255-21509764	protein_coding	0.488879	0	0.988879	0.5	0.983866	Zfp53	0
ENSMUSG00000027611	ENSMUSG00000027611	Procr	chr2:155751116-155755471	protein_coding	0.489092	0	0.989092	0.5	0.984177	Procr	0
ENSMUSG00000094955	ENSMUSG00000094955	Gm3699	chr10:43456423-43456501		362.946	0	363.446	0.5	9.5056	#N/A	1
ENSMUSG00000028776	ENSMUSG00000028776	Tinagl1	chr4:130164453-130175122	protein_coding	0.490288	0	0.990288	0.5	0.98592	Tinagl1	0
ENSMUSG00000050157	ENSMUSG00000050157	Gm867	chr10:75937720-75940672	protein_coding	0.493054	0	0.993054	0.5	0.989944	Gm867	0
ENSMUSG00000006850	ENSMUSG00000006850	Tmco6	chr18:36735067-36742391	protein_coding	0.494564	0	0.994564	0.5	0.992136	Tmco6	0
ENSMUSG00000001804	ENSMUSG00000001804	Dsg4	chr18:20436174-20471821	protein_coding	0	0	0.5	0.5	0	#N/A	0
ENSMUSG00000001815	ENSMUSG00000001815	Evx2	chr2:74652996-74659861	protein_coding	0	0	0.5	0.5	0	#N/A	0
ENSMUSG00000001819	ENSMUSG00000001819	Hoxd13	chr2:74668309-74671599	protein_coding	0	0	0.5	0.5	0	#N/A	0
ENSMUSG00000001823	ENSMUSG00000001823	Hoxd12	chr2:74674928-74677706	protein_coding	0	0	0.5	0.5	0	#N/A	0
ENSMUSG00000001827	ENSMUSG00000001827	Folr1	chr7:101858330-101870788	protein_coding	0.0865068	0	0.586507	0.5	0.23022	#N/A	0
ENSMUSG00000041718	ENSMUSG00000041718	Alg13	chrX:144317811-144374450	protein_coding	0.49742	0	0.99742	0.5	0.996273	Alg13	0
ENSMUSG00000077303	ENSMUSG00000077303	Gm22472	chrX:101242737-101242871		354.645	0	355.145	0.5	9.47226	#N/A	1
ENSMUSG00000023908	ENSMUSG00000023908	Pkmyt1	chr17:23726335-23736729	protein_coding	0.49898	2.06178	0.99898	2.56178	-1.35862	Pkmyt1	0
ENSMUSG00000047789	ENSMUSG00000047789	Slc38a9	chr13:112660765-112738743	protein_coding	0.499109	0.618976	0.999109	1.11898	-0.163465	Slc38a9	0
ENSMUSG00000062931	ENSMUSG00000062931	Zfp938	chr10:82224849-82241280	protein_coding	0.500035	0	1.00004	0.5	1.00005	Zfp938	0
ENSMUSG00000001864	ENSMUSG00000001864	Aif1l	chr2:31950259-31973442	protein_coding	1.18559	0	1.68559	0.5	1.75325	Aif1l	0
ENSMUSG00000001865	ENSMUSG00000001865	Cpa3	chr3:20215616-20242181	protein_coding	0.316317	0	0.816317	0.5	0.707201	Cpa3	0
ENSMUSG00000001870	ENSMUSG00000001870	Ltbp1	chr17:75005567-75392512	protein_coding	1.61924	0	2.11924	0.5	2.08355	Ltbp1	0
ENSMUSG00000062861	ENSMUSG00000062861	Zfp28	chr7:6383317-6396633	protein_coding	0.502502	0	1.0025	0.5	1.00361	Zfp28	0
ENSMUSG00000001901	ENSMUSG00000001901	Kcnh6	chr11:106008123-106034549	protein_coding	0.0366567	0	0.536657	0.5	0.102071	#N/A	0
ENSMUSG00000074738	ENSMUSG00000074738	B930041F14Rik	chr4:155694341-155696481	protein_coding	0.503331	0	1.00333	0.5	1.0048	B930041F14Rik	0
ENSMUSG00000078936	ENSMUSG00000078936	Trappc13	chr13:104173721-104178439	protein_coding	0.506538	0	1.00654	0.5	1.0094	Trappc13	0
ENSMUSG00000020648	ENSMUSG00000020648	Dus4l	chr12:31640054-31654826	protein_coding	0.509491	0	1.00949	0.5	1.01363	Dus4l	0
ENSMUSG00000054863	ENSMUSG00000054863	Fam19a5	chr15:87625229-87759336	protein_coding	0.510478	0	1.01048	0.5	1.01504	Fam19a5	0
ENSMUSG00000021947	ENSMUSG00000021947	Cryl1	chr14:57275033-57398483	protein_coding	0.513568	4.16503	1.01357	4.66503	-2.20244	Cryl1	0
ENSMUSG00000001930	ENSMUSG00000001930	Vwf	chr6:125546773-125686679	protein_coding	0.363933	0.814593	0.863933	1.31459	-0.605625	#N/A	0
ENSMUSG00000018800	ENSMUSG00000018800	Abca5	chr11:110269368-110337716	protein_coding	0.513584	0	1.01358	0.5	1.01947	Abca5	0
ENSMUSG00000001943	ENSMUSG00000001943	Vsig2	chr9:37539254-37544205	protein_coding	0	0	0.5	0.5	0	#N/A	0
ENSMUSG00000001946	ENSMUSG00000001946	Esam	chr9:37528077-37538319	protein_coding	0.363977	0	0.863977	0.5	0.789065	Esam	0
ENSMUSG00000001948	ENSMUSG00000001948	Spa17	chr9:37603294-37613720	protein_coding	0.434078	0	0.934078	0.5	0.901615	Spa17	0
ENSMUSG00000020380	ENSMUSG00000020380	Rad50	chr11:53649518-53707319	protein_coding	0.513853	0.184105	1.01385	0.684105	0.567559	Rad50	0
ENSMUSG00000040794	ENSMUSG00000040794	C1qtnf4	chr2:90885859-90890525	protein_coding	0.515793	3.1983	1.01579	3.6983	-1.86426	C1qtnf4	0
ENSMUSG00000021692	ENSMUSG00000021692	Dimt1	chr13:106947128-106960224	protein_coding	0.516858	0	1.01686	0.5	1.02412	Dimt1	0
ENSMUSG00000001985	ENSMUSG00000001985	Grik3	chr4:125490699-125714173	protein_coding	0.200141	0.193172	0.700141	0.693172	0.0144321	#N/A	0
ENSMUSG00000001986	ENSMUSG00000001986	Gria3	chrX:41400853-41678601	protein_coding	0.929971	0.0142177	1.42997	0.514218	1.47553	Gria3	0
ENSMUSG00000001988	ENSMUSG00000001988	Npas1	chr7:16455720-16476780	protein_coding	0	0	0.5	0.5	0	#N/A	0
ENSMUSG00000001995	ENSMUSG00000001995	Sipa1l2	chr8:125418062-125492710	protein_coding	0.531872	0	1.03187	0.5	1.04526	Sipa1l2	0
ENSMUSG00000004267	ENSMUSG00000004267	Eno2	chr6:124760052-124769673	protein_coding	0.519499	0.105143	1.0195	0.605143	0.752512	Eno2	0
ENSMUSG00000074826	ENSMUSG00000074826	Gm10767	chr13:66904913-66909236	protein_coding	0.522444	0	1.02244	0.5	1.03202	Gm10767	0
ENSMUSG00000002006	ENSMUSG00000002006	Pdzd4	chrX:73793358-73824969	protein_coding	0.169747	0	0.669747	0.5	0.421688	#N/A	0
ENSMUSG00000084032	ENSMUSG00000084032	Gm12991	chr4:135377157-135377235		309.489	0	309.989	0.5	9.27607	#N/A	1
ENSMUSG00000069208	ENSMUSG00000069208	Zfp825	chr13:74480516-74482943	protein_coding	0.52328	0.16798	1.02328	0.66798	0.615324	Zfp825	0
ENSMUSG00000002012	ENSMUSG00000002012	Pnck	chrX:73655993-73660117	protein_coding	0.0816667	0	0.581667	0.5	0.218265	#N/A	0
ENSMUSG00000026659	ENSMUSG00000026659	Dusp12	chr1:170873497-170885540	protein_coding	0.524174	0	1.02417	0.5	1.03446	Dusp12	0
ENSMUSG00000025887	ENSMUSG00000025887	Casp12	chr9:5345429-5373032	protein_coding	0.525264	0	1.02526	0.5	1.036	Casp12	0
ENSMUSG00000054836	ENSMUSG00000054836	Elp6	chr9:110305191-110322092	protein_coding	0.526001	0.962668	1.026	1.46267	-0.51157	Elp6	0
ENSMUSG00000076137	ENSMUSG00000076137	Gm26384	chr17:21284102-21284212		296.576	0	297.076	0.5	9.21469	#N/A	1
ENSMUSG00000002028	ENSMUSG00000002028	Mll1	chr9:44803354-44881296	protein_coding	3.01349	0.991072	3.51349	1.49107	1.23655	#N/A	0
ENSMUSG00000027656	ENSMUSG00000027656	Wisp2	chr2:163820860-163833146	protein_coding	0.528614	0	1.02861	0.5	1.0407	Wisp2	0
ENSMUSG00000002032	ENSMUSG00000002032	Tmem25	chr9:44793775-44799307	protein_coding	0.0256475	0	0.525648	0.5	0.0721676	#N/A	0
ENSMUSG00000002033	ENSMUSG00000002033	Cd3g	chr9:44969571-44980431	protein_coding	0	0	0.5	0.5	0	#N/A	0
ENSMUSG00000034292	ENSMUSG00000034292	Traf3ip1	chr1:91494667-91529303	protein_coding	0.528849	1.09942	1.02885	1.59942	-0.636518	Traf3ip1	0
ENSMUSG00000029291	ENSMUSG00000029291	Rufy3	chr5:88583573-88642671	protein_coding	0.530193	0.350836	1.03019	0.850836	0.275962	Rufy3	0
ENSMUSG00000002055	ENSMUSG00000002055	Spag5	chr11:78301528-78322457	protein_coding	0.242262	0.118989	0.742262	0.618989	0.262015	Spag5	0
ENSMUSG00000002057	ENSMUSG00000002057	Foxn1	chr11:78357576-78386558	protein_coding	0	0	0.5	0.5	0	#N/A	0
ENSMUSG00000055301	ENSMUSG00000055301	Adh7	chr3:138217822-138233382	protein_coding	0.531356	0	1.03136	0.5	1.04454	Adh7	0
ENSMUSG00000017390	ENSMUSG00000017390	Aldoc	chr11:78322967-78327781	protein_coding	0.531551	0	1.03155	0.5	1.04482	Aldoc	0
ENSMUSG00000039531	ENSMUSG00000039531	Zufsp	chr10:33926935-33951212	protein_coding	0.53239	0	1.03239	0.5	1.04599	Zufsp	0
ENSMUSG00000004038	ENSMUSG00000004038	Gstm3	chr3:107942332-107969283	protein_coding	0.540091	0	1.04009	0.5	1.05671	Gstm3	0
ENSMUSG00000002076	ENSMUSG00000002076	Hsf2bp	chr17:31944768-32034508	protein_coding	0.0217012	0	0.521701	0.5	0.0612957	#N/A	0
ENSMUSG00000030725	ENSMUSG00000030725	Lipt2	chr7:100159276-100161365	protein_coding	0.544723	0	1.04472	0.5	1.06312	Lipt2	0
ENSMUSG00000002100	ENSMUSG00000002100	Mybpc3	chr2:91118143-91136516	protein_coding	0	0	0.5	0.5	0	#N/A	0
ENSMUSG00000041117	ENSMUSG00000041117	Ccdc8	chr7:16992707-16997516	protein_coding	0.54844	0.437308	1.04844	0.937308	0.161649	Ccdc8	0
ENSMUSG00000028256	ENSMUSG00000028256	Odf2l	chr3:145118588-145153915	protein_coding	0.549213	0	1.04921	0.5	1.06931	Odf2l	0
ENSMUSG00000002104	ENSMUSG00000002104	Rapsn	chr2:91035619-91045729	protein_coding	0.135772	0	0.635772	0.5	0.346581	#N/A	0
ENSMUSG00000095789	ENSMUSG00000095789	Nupr1l	chr5:129908567-129910396	protein_coding	0.549498	0.817868	1.0495	1.31787	-0.328506	Nupr1l	0
ENSMUSG00000071267	ENSMUSG00000071267	Zfp942	chr17:21926959-21962464	protein_coding	0.550147	0	1.05015	0.5	1.07059	Zfp942	0
ENSMUSG00000035337	ENSMUSG00000035337	Uchl4	chr9:64235200-64236362	protein_coding	0.55165	0	1.05165	0.5	1.07265	Uchl4	0
ENSMUSG00000046157	ENSMUSG00000046157	Tmem229b	chr12:78961794-79007627	protein_coding	0.558238	0	1.05824	0.5	1.08166	Tmem229b	0
ENSMUSG00000002111	ENSMUSG00000002111	Sfpi1	chr2:91082389-91115756	protein_coding	0.188663	0	0.688663	0.5	0.46187	Sfpi1	0
ENSMUSG00000024943	ENSMUSG00000024943	Smc5	chr19:23206440-23273897	protein_coding	0.560607	0	1.06061	0.5	1.08489	Smc5	0
ENSMUSG00000046402	ENSMUSG00000046402	Rbp1	chr9:98422960-98446551	protein_coding	0.569504	0.167566	1.0695	0.667566	0.679959	Rbp1	0
ENSMUSG00000002190	ENSMUSG00000002190	Clgn	chr8:83389866-83428552	protein_coding	0	0	0.5	0.5	0	#N/A	0
ENSMUSG00000002204	ENSMUSG00000002204	Napsa	chr7:44572431-44586862	protein_coding	0.222325	0.124364	0.722325	0.624364	0.210261	#N/A	0
ENSMUSG00000021007	ENSMUSG00000021007	Spata7	chr12:98628156-98669815	protein_coding	0.569603	0	1.0696	0.5	1.09708	Spata7	0
ENSMUSG00000070520	ENSMUSG00000070520	Ndnl2	chr7:64867051-64872997	protein_coding	0.570286	0.0198729	1.07029	0.519873	1.04177	Ndnl2	0
ENSMUSG00000025050	ENSMUSG00000025050	Pcgf6	chr19:47033618-47050845	protein_coding	0.574642	0	1.07464	0.5	1.10386	Pcgf6	0
ENSMUSG00000020305	ENSMUSG00000020305	Asb3	chr11:30954394-31102704	protein_coding	0.57608	0.145912	1.07608	0.645912	0.736376	Asb3	0
ENSMUSG00000002227	ENSMUSG00000002227	Mov10	chr3:104794835-104818563	protein_coding	1.89266	0.65984	2.39266	1.15984	1.04469	Mov10	0
ENSMUSG00000002228	ENSMUSG00000002228	Ppm1j	chr3:104781055-104786018	protein_coding	0.0374772	0	0.537477	0.5	0.104275	#N/A	0
ENSMUSG00000024481	ENSMUSG00000024481	4833403I15Rik	chr18:46850038-46905446	protein_coding	0.576497	0	1.0765	0.5	1.10634	4833403I15Rik	0
ENSMUSG00000002240	ENSMUSG00000002240	4930432K09Rik	chr5:87825685-87846386	protein_coding	0	0	0.5	0.5	0	#N/A	0
ENSMUSG00000023892	ENSMUSG00000023892	Zfp51	chr17:21450351-21465591	protein_coding	0.577464	0	1.07746	0.5	1.10764	Zfp51	0
ENSMUSG00000015312	ENSMUSG00000015312	Gadd45b	chr10:80930090-80932204	protein_coding	0.579515	0	1.07952	0.5	1.11038	Gadd45b	0
ENSMUSG00000002257	ENSMUSG00000002257	Def6	chr17:28207777-28228608	protein_coding	0.692638	0	1.19264	0.5	1.25416	Def6	0
ENSMUSG00000096001	ENSMUSG00000096001	2610528A11Rik	chr14:37102139-37110101	protein_coding	0.579766	0	1.07977	0.5	1.11072	2610528A11Rik	0
ENSMUSG00000045624	ENSMUSG00000045624	Esf1	chr2:140119882-140170564	protein_coding	0.581487	0	1.08149	0.5	1.11302	Esf1	0
ENSMUSG00000029675	ENSMUSG00000029675	Eln	chr5:134703780-134747241	protein_coding	0.58149	1.3207	1.08149	1.8207	-0.751473	Eln	0
ENSMUSG00000031990	ENSMUSG00000031990	Jam3	chr9:27097384-27155421	protein_coding	0.582891	0	1.08289	0.5	1.11489	Jam3	0
ENSMUSG00000001773	ENSMUSG00000001773	Folh1	chr7:86719351-86775864	protein_coding	0.584656	0	1.08466	0.5	1.11724	Folh1	0
ENSMUSG00000048706	ENSMUSG00000048706	Lurap1l	chr4:80910645-80955628	protein_coding	0.586466	0	1.08647	0.5	1.11964	Lurap1l	0
ENSMUSG00000002297	ENSMUSG00000002297	Dbf4	chr5:8396972-8422716	protein_coding	0.59264	0.0442706	1.09264	0.544271	1.00542	Dbf4	0
ENSMUSG00000044337	ENSMUSG00000044337	Cxcr7	chr1:90203979-90216751	protein_coding	0.586667	0	1.08667	0.5	1.11991	Cxcr7	0
ENSMUSG00000031595	ENSMUSG00000031595	Pdgfrl	chr8:40926211-40990785	protein_coding	0.586957	0.0702626	1.08696	0.570263	0.930597	Pdgfrl	0
ENSMUSG00000046791	ENSMUSG00000046791	2410016O06Rik	chr12:83950607-83952953	protein_coding	0.590417	0	1.09042	0.5	1.12488	2410016O06Rik	0
ENSMUSG00000057835	ENSMUSG00000057835	Zfp119a	chr17:55865203-55878862	protein_coding	0.593402	0	1.0934	0.5	1.12882	Zfp119a	0
ENSMUSG00000002324	ENSMUSG00000002324	Rec8	chr14:55618036-55625395	protein_coding	0	0	0.5	0.5	0	#N/A	0
ENSMUSG00000093179	ENSMUSG00000093179	Gm23868	chrX:48342099-48342166		242.178	0	242.678	0.5	8.9229	#N/A	1
ENSMUSG00000094441	ENSMUSG00000094441	Zfp955a	chr17:33241518-33255040	protein_coding	0.593402	0	1.0934	0.5	1.12882	Zfp955a	0
ENSMUSG00000056888	ENSMUSG00000056888	Glipr1	chr10:111985447-112002631	protein_coding	0.594056	0.741439	1.09406	1.24144	-0.182327	Glipr1	0
ENSMUSG00000022615	ENSMUSG00000022615	Tymp	chr15:89371930-89377039	protein_coding	0.597807	2.37886e-128	1.09781	0.5	1.13462	Tymp	0
ENSMUSG00000002341	ENSMUSG00000002341	Ncan	chr8:70093084-70120873	protein_coding	0.117819	0.0146969	0.617819	0.514697	0.263461	#N/A	0
ENSMUSG00000024253	ENSMUSG00000024253	Dync2li1	chr17:84626495-84655558	protein_coding	0.601108	0	1.10111	0.5	1.13896	Dync2li1	0
ENSMUSG00000039908	ENSMUSG00000039908	Slc26a11	chr11:119355556-119381079	protein_coding	0.602283	0	1.10228	0.5	1.14049	Slc26a11	0
ENSMUSG00000051316	ENSMUSG00000051316	Taf7	chr18:37640901-37644204	protein_coding	0.602324	0.0418976	1.10232	0.541898	1.02446	Taf7	0
ENSMUSG00000021384	ENSMUSG00000021384	Susd3	chr13:49230689-49248706	protein_coding	0.603136	0	1.10314	0.5	1.14161	Susd3	0
ENSMUSG00000006463	ENSMUSG00000006463	Zdhhc24	chr19:4878667-4885397	protein_coding	0.606344	0.0784284	1.10634	0.578428	0.93559	Zdhhc24	0
ENSMUSG00000050069	ENSMUSG00000050069	Grem2	chr1:174833784-174921819	protein_coding	0.607138	0	1.10714	0.5	1.14684	Grem2	0
ENSMUSG00000047604	ENSMUSG00000047604	Frat2	chr19:41845977-41848132	protein_coding	0.607328	0.0428694	1.10733	0.542869	1.02841	Frat2	0
ENSMUSG00000002384	ENSMUSG00000002384	Bmp8b	chr4:123105164-123132099	protein_coding	0.121523	0	0.621523	0.5	0.31388	#N/A	0
ENSMUSG00000032965	ENSMUSG00000032965	Ift57	chr16:49699232-49765126	protein_coding	0.609227	0	1.10923	0.5	1.14955	Ift57	0
ENSMUSG00000039985	ENSMUSG00000039985	Fam60a	chr6:148921034-148946467	protein_coding	0.609583	0	1.10958	0.5	1.15002	Fam60a	0
ENSMUSG00000051748	ENSMUSG00000051748	1100001G20Rik	chr11:83746939-83752642	protein_coding	0.612145	0	1.11214	0.5	1.15334	1100001G20Rik	0
ENSMUSG00000047878	ENSMUSG00000047878	A4galt	chr15:83226725-83251774	protein_coding	0.61294	0.0196724	1.11294	0.519672	1.0987	A4galt	0
ENSMUSG00000036572	ENSMUSG00000036572	Upf3b	chrX:37091677-37110322	protein_coding	0.615022	0.358147	1.11502	0.858147	0.377775	Upf3b	0
ENSMUSG00000096968	ENSMUSG00000096968	DUSP12	chr1:170885064-170885881	protein_coding	0.615033	0	1.11503	0.5	1.15709	Dusp12	0
ENSMUSG00000001379	ENSMUSG00000001379	Apbb3	chr18:36671159-36679366	protein_coding	0.616565	0.539533	1.11657	1.03953	0.103132	Apbb3	0
ENSMUSG00000026803	ENSMUSG00000026803	Ttf1	chr2:29060261-29087656	protein_coding	0.620629	0.208991	1.12063	0.708991	0.66047	Ttf1	0
ENSMUSG00000051650	ENSMUSG00000051650	B3gnt2	chr11:22834746-22860961	protein_coding	0.620836	0.276625	1.12084	0.776625	0.529285	B3gnt2	0
ENSMUSG00000002459	ENSMUSG00000002459	Rgs20	chr1:4909575-5070285	protein_coding	1.25362	0.316605	1.75362	0.816605	1.10263	#N/A	0
ENSMUSG00000093816	ENSMUSG00000093816	Gm26445	chr10:130592135-130592244		236.35	0	236.85	0.5	8.88783	#N/A	1
ENSMUSG00000022020	ENSMUSG00000022020	Naa16	chr14:79334203-79390778	protein_coding	0.620906	0.85515	1.12091	1.35515	-0.273787	Naa16	0
ENSMUSG00000002486	ENSMUSG00000002486	Tchp	chr5:114707759-114722327	protein_coding	1.1296	2.09479	1.6296	2.59479	-0.6711	Tchp	0
ENSMUSG00000064721	ENSMUSG00000064721	Gm25855	chr19:8723995-8724060		230.917	5.25361e-16	231.417	0.5	8.85435	#N/A	1
ENSMUSG00000034848	ENSMUSG00000034848	Ttc21b	chr2:66184326-66256617	protein_coding	0.622205	0.157789	1.12221	0.657789	0.770639	Ttc21b	0
ENSMUSG00000002500	ENSMUSG00000002500	Rpl3l	chr17:24727819-24736143	protein_coding	0.132999	0	0.632999	0.5	0.340275	#N/A	0
ENSMUSG00000002504	ENSMUSG00000002504	Slc9a3r2	chr17:24639281-24650305	protein_coding	1.83735	0.669071	2.33735	1.16907	0.999511	Slc9a3r2	0
ENSMUSG00000021701	ENSMUSG00000021701	Plk2	chr13:110395043-110400844	protein_coding	0.622497	0	1.1225	0.5	1.16671	Plk2	0
ENSMUSG00000023913	ENSMUSG00000023913	Pla2g7	chr17:43568097-43612201	protein_coding	0.622732	0	1.12273	0.5	1.16701	Pla2g7	0
ENSMUSG00000023284	ENSMUSG00000023284	Zfp605	chr5:110110091-110129794	protein_coding	0.629119	0.0203721	1.12912	0.520372	1.11758	Zfp605	0
ENSMUSG00000002565	ENSMUSG00000002565	Scin	chr12:40059768-40134228	protein_coding	0.0341991	0.122233	0.534199	0.622233	-0.220077	Scin	0
ENSMUSG00000002578	ENSMUSG00000002578	Ikzf4	chr10:128630842-128645991	protein_coding	0.0789001	0.0591024	0.5789	0.559102	0.0502019	#N/A	0
ENSMUSG00000041238	ENSMUSG00000041238	Rbbp8	chr18:11633275-11743207	protein_coding	0.629338	0	1.12934	0.5	1.17548	Rbbp8	0
ENSMUSG00000002588	ENSMUSG00000002588	Pon1	chr6:5168089-5193946	protein_coding	0	0	0.5	0.5	0	#N/A	0
ENSMUSG00000042787	ENSMUSG00000042787	Exog	chr9:119444922-119465517	protein_coding	0.630573	0	1.13057	0.5	1.17705	Exog	0
ENSMUSG00000028167	ENSMUSG00000028167	Bdh2	chr3:135281220-135304426	protein_coding	0.632571	0	1.13257	0.5	1.1796	Bdh2	0
ENSMUSG00000060209	ENSMUSG00000060209	Gm6570	chr3:87679650-87679998		0.635367	0.154319	1.13537	0.654319	0.795093	Gm6570	0
ENSMUSG00000002617	ENSMUSG00000002617	Zfp40	chr17:23173868-23193252	protein_coding	0.310665	2.2191	0.810665	2.7191	-1.74595	Zfp40	0
ENSMUSG00000079608	ENSMUSG00000079608	Stard6	chr18:70472453-70501066	protein_coding	0.637017	0	1.13702	0.5	1.18525	Stard6	0
ENSMUSG00000002633	ENSMUSG00000002633	Shh	chr5:28456814-28467101	protein_coding	0	0	0.5	0.5	0	#N/A	0
ENSMUSG00000054321	ENSMUSG00000054321	Taf4b	chr18:14783244-14900359	protein_coding	0.637498	0	1.1375	0.5	1.18586	Taf4b	0
ENSMUSG00000021115	ENSMUSG00000021115	Vrk1	chr12:106010262-106077410	protein_coding	0.637897	0	1.1379	0.5	1.18637	Vrk1	0
ENSMUSG00000025395	ENSMUSG00000025395	Prim1	chr10:128015167-128030037	protein_coding	0.639324	0	1.13932	0.5	1.18818	Prim1	0
ENSMUSG00000020801	ENSMUSG00000020801	Med31	chr11:72211723-72215592	protein_coding	0.639381	0	1.13938	0.5	1.18825	Med31	0
ENSMUSG00000002664	ENSMUSG00000002664	Pspn	chr17:56999456-57000018	protein_coding	0.179312	0	0.679312	0.5	0.442146	#N/A	0
ENSMUSG00000002668	ENSMUSG00000002668	Dennd1c	chr17:57066055-57078510	protein_coding	0	0	0.5	0.5	0	#N/A	0
ENSMUSG00000026566	ENSMUSG00000026566	Mpzl1	chr1:165592180-165634541	protein_coding	0.64118	0	1.14118	0.5	1.19053	Mpzl1	0
ENSMUSG00000002688	ENSMUSG00000002688	Prkd1	chr12:50341230-50649223	protein_coding	2.86178	0	3.36178	0.5	2.74923	Prkd1	0
ENSMUSG00000002699	ENSMUSG00000002699	Lcp2	chr11:34046919-34092295	protein_coding	0.504512	0.201031	1.00451	0.701031	0.518945	#N/A	0
ENSMUSG00000073176	ENSMUSG00000073176	Zfp449	chrX:56346399-56365674	protein_coding	0.641203	0	1.1412	0.5	1.19056	Zfp449	0
ENSMUSG00000001227	ENSMUSG00000001227	Sema6b	chr17:56123084-56140343	protein_coding	0.641555	1.98817	1.14155	2.48817	-1.12408	Sema6b	0
ENSMUSG00000074182	ENSMUSG00000074182	Znhit6	chr3:145576207-145605245	protein_coding	0.642071	0	1.14207	0.5	1.19165	Znhit6	0
ENSMUSG00000037161	ENSMUSG00000037161	Mgarp	chr3:51388414-51396738	protein_coding	0.642513	0	1.14251	0.5	1.19221	Mgarp	0
ENSMUSG00000033405	ENSMUSG00000033405	Nudt15	chr14:73519863-73548242	protein_coding	0.643724	0	1.14372	0.5	1.19374	Nudt15	0
ENSMUSG00000041199	ENSMUSG00000041199	Rpusd1	chr17:25727750-25731456	protein_coding	0.644472	0	1.14447	0.5	1.19468	Rpusd1	0
ENSMUSG00000026723	ENSMUSG00000026723	Trdmt1	chr2:13509013-13544664	protein_coding	0.644554	0	1.14455	0.5	1.19479	Trdmt1	0
ENSMUSG00000079610	ENSMUSG00000079610	Ankrd39	chr1:36538172-36547201	protein_coding	0.647877	0	1.14788	0.5	1.19897	Ankrd39	0
ENSMUSG00000054717	ENSMUSG00000054717	Hmgb2	chr8:57511842-57515999	protein_coding	0.649248	0	1.14925	0.5	1.20069	Hmgb2	0
ENSMUSG00000020413	ENSMUSG00000020413	Hus1	chr11:8993136-9011191	protein_coding	0.653315	4.17799	1.15332	4.67799	-2.0201	Hus1	0
ENSMUSG00000029253	ENSMUSG00000029253	Cenpc1	chr5:86012042-86065583	protein_coding	0.653533	0	1.15353	0.5	1.20606	Cenpc1	0
ENSMUSG00000002771	ENSMUSG00000002771	Grin2d	chr7:45831882-45870928	protein_coding	0.0782303	0.239858	0.57823	0.739858	-0.355604	#N/A	0
ENSMUSG00000045827	ENSMUSG00000045827	Serpinb9	chr13:33003249-33017957	protein_coding	0.653928	0	1.15393	0.5	1.20655	Serpinb9	0
ENSMUSG00000095746	ENSMUSG00000095746	Snurf	chr7:59995448-60005049	protein_coding	0.654174	0	1.15417	0.5	1.20686	Snurf	0
ENSMUSG00000002791	ENSMUSG00000002791	Pdxk-ps	chr17:32076082-32100286		0.0768288	0.00261586	0.576829	0.502616	0.198687	#N/A	0
ENSMUSG00000021186	ENSMUSG00000021186	Fbln5	chr12:101746564-101819055	protein_coding	0.654777	0.527312	1.15478	1.02731	0.16874	Fbln5	0
ENSMUSG00000002799	ENSMUSG00000002799	Jag2	chr12:112908589-112929495	protein_coding	0.0755608	0.0294658	0.575561	0.529466	0.120431	#N/A	0
ENSMUSG00000014776	ENSMUSG00000014776	Nol3	chr8:105276446-105281939	protein_coding	0.65492	0.557498	1.15492	1.0575	0.127138	Nol3	0
ENSMUSG00000024384	ENSMUSG00000024384	Iws1	chr18:32067733-32104331	protein_coding	0.657174	0.645103	1.15717	1.1451	0.0151284	Iws1	0
ENSMUSG00000007216	ENSMUSG00000007216	Zfp775	chr6:48613179-48623227	protein_coding	0.660039	0	1.16004	0.5	1.21417	Zfp775	0
ENSMUSG00000031527	ENSMUSG00000031527	Eri1	chr8:35465264-35495533	protein_coding	0.66012	0.351216	1.16012	0.851216	0.446677	Eri1	0
ENSMUSG00000002814	ENSMUSG00000002814	Top3a	chr11:60740057-60777365	protein_coding	1.25312	0.899168	1.75312	1.39917	0.325356	Top3a	0
ENSMUSG00000072969	ENSMUSG00000072969	Armcx5	chrX:135742732-135747322	protein_coding	0.662606	0.842035	1.16261	1.34204	-0.20706	Armcx5	0
ENSMUSG00000074358	ENSMUSG00000074358	Ccdc61	chr7:18890882-18910415	protein_coding	0.66512	1.77043	1.16512	2.27043	-0.962487	Ccdc61	0
ENSMUSG00000024074	ENSMUSG00000024074	Crim1	chr17:78200247-78376592	protein_coding	0.666661	0.0601056	1.16666	0.560106	1.05861	Crim1	0
ENSMUSG00000034248	ENSMUSG00000034248	Slc25a37	chr14:69241850-69285103	protein_coding	0.666668	0.0286757	1.16667	0.528676	1.14194	Slc25a37	0
ENSMUSG00000002835	ENSMUSG00000002835	Chaf1a	chr17:56040415-56068026	protein_coding	1.20662	0	1.70662	0.5	1.77114	Chaf1a	0
ENSMUSG00000072258	ENSMUSG00000072258	Taf1a	chr1:183388980-183409353	protein_coding	0.66761	0	1.16761	0.5	1.22356	Taf1a	0
ENSMUSG00000059895	ENSMUSG00000059895	Ptp4a3	chr15:73723144-73758766	protein_coding	0.667902	0.0345699	1.1679	0.53457	1.12747	Ptp4a3	0
ENSMUSG00000059475	ENSMUSG00000059475	Zfp426	chr9:20468548-20492746	protein_coding	0.668122	0	1.16812	0.5	1.22419	Zfp426	0
ENSMUSG00000022526	ENSMUSG00000022526	Zfp251	chr15:76852147-76871435	protein_coding	0.669675	0	1.16968	0.5	1.22611	Zfp251	0
ENSMUSG00000002870	ENSMUSG00000002870	Mcm2	chr6:88883474-88898780	protein_coding	1.02575	0	1.52575	0.5	1.60952	Mcm2	0
ENSMUSG00000096433	ENSMUSG00000096433	Gm4944	chr17:22197264-22225614	protein_coding	0.676118	0.0385336	1.17612	0.538534	1.12692	Gm4944	0
ENSMUSG00000035759	ENSMUSG00000035759	Bbs10	chr10:111298678-111301736	protein_coding	0.67949	0	1.17949	0.5	1.23816	Bbs10	0
ENSMUSG00000078607	ENSMUSG00000078607	1810010H24Rik	chr11:107028117-107030443		0.680654	0	1.18065	0.5	1.23959	1810010H24Rik	0
ENSMUSG00000034105	ENSMUSG00000034105	Tldc1	chr8:119760586-119778416	protein_coding	0.680918	0	1.18092	0.5	1.23991	Tldc1	0
ENSMUSG00000047141	ENSMUSG00000047141	Zfp654	chr16:64780350-64786321	protein_coding	0.681232	0	1.18123	0.5	1.24029	Zfp654	0
ENSMUSG00000002908	ENSMUSG00000002908	Kcnn1	chr8:70842048-70857008	protein_coding	0.56899	0	1.06899	0.5	1.09625	Kcnn1	0
ENSMUSG00000002910	ENSMUSG00000002910	Arrdc2	chr8:70835154-70839720	protein_coding	0.865472	0.421017	1.36547	0.921017	0.5681	Arrdc2	0
ENSMUSG00000002930	ENSMUSG00000002930	Ppp1r17	chr6:56017514-56032688	protein_coding	0.042639	0	0.542639	0.5	0.118065	#N/A	0
ENSMUSG00000058174	ENSMUSG00000058174	Gm5148	chr3:37714189-37724490	protein_coding	0.681808	0.084633	1.18181	0.584633	1.01539	Gm5148	0
ENSMUSG00000057858	ENSMUSG00000057858	D19Ertd737e	chr19:60198585-60226697	protein_coding	0.687549	0	1.18755	0.5	1.24799	D19Ertd737e	0
ENSMUSG00000021028	ENSMUSG00000021028	Mbip	chr12:56328305-56345894	protein_coding	0.692806	0	1.19281	0.5	1.25436	Mbip	0
ENSMUSG00000006378	ENSMUSG00000006378	Gcat	chr15:79030873-79043558	protein_coding	0.693588	0.283669	1.19359	0.783669	0.606989	Gcat	0
ENSMUSG00000079083	ENSMUSG00000079083	Jrkl	chr9:13242789-13245741	protein_coding	0.694458	0	1.19446	0.5	1.25636	Jrkl	0
ENSMUSG00000047037	ENSMUSG00000047037	Nipa1	chr7:55977566-56019954	protein_coding	0.696104	0.0378845	1.1961	0.537884	1.15297	Nipa1	0
ENSMUSG00000002980	ENSMUSG00000002980	Bcam	chr7:19756130-19771016	protein_coding	0.183253	0	0.683253	0.5	0.450492	Bcam	0
ENSMUSG00000059834	ENSMUSG00000059834	Sclt1	chr3:41626716-41742514	protein_coding	0.697841	0	1.19784	0.5	1.26044	Sclt1	0
ENSMUSG00000050410	ENSMUSG00000050410	Tcf19	chr17:35512733-35516824	protein_coding	0.69943	0	1.19943	0.5	1.26235	Tcf19	0
ENSMUSG00000028378	ENSMUSG00000028378	Ptgr1	chr4:58965438-58987119	protein_coding	0.700252	0	1.20025	0.5	1.26334	Ptgr1	0
ENSMUSG00000040841	ENSMUSG00000040841	Six5	chr7:19094593-19098549	protein_coding	0.701754	0.482468	1.20175	0.982468	0.290659	Six5	0
ENSMUSG00000002992	ENSMUSG00000002992	Apoc2	chr7:19671578-19681423	protein_coding	0.850499	0	1.3505	0.5	1.43349	Apoc2	0
ENSMUSG00000042451	ENSMUSG00000042451	Mybph	chr1:134193447-134201231	protein_coding	0.701903	0.0681959	1.2019	0.568196	1.08086	Mybph	0
ENSMUSG00000022360	ENSMUSG00000022360	Atad2	chr15:58094046-58135082	protein_coding	0.702363	0	1.20236	0.5	1.26587	Atad2	0
ENSMUSG00000024269	ENSMUSG00000024269	Tpgs2	chr18:25127222-25169007	protein_coding	0.706411	0	1.20641	0.5	1.27072	Tpgs2	0
ENSMUSG00000015652	ENSMUSG00000015652	Steap1	chr5:5736316-5749326	protein_coding	0.707597	0	1.2076	0.5	1.27214	Steap1	0
ENSMUSG00000053916	ENSMUSG00000053916	Nanp	chr2:151029684-151039398	protein_coding	0.709291	0	1.20929	0.5	1.27416	Nanp	0
ENSMUSG00000041491	ENSMUSG00000041491	Cep78	chr19:15955773-15984989	protein_coding	0.712865	0	1.21286	0.5	1.27842	Cep78	0
ENSMUSG00000031728	ENSMUSG00000031728	Zfp821	chr8:109705548-109724932	protein_coding	0.715245	0	1.21524	0.5	1.28125	Zfp821	0
ENSMUSG00000062627	ENSMUSG00000062627	Mysm1	chr4:94942039-94979100	protein_coding	0.71591	0.0278025	1.21591	0.527802	1.20397	Mysm1	0
ENSMUSG00000003051	ENSMUSG00000003051	Elf3	chr1:135253573-135258472	protein_coding	0	0	0.5	0.5	0	Elf3	0
ENSMUSG00000003053	ENSMUSG00000003053	Cyp2c29	chr19:39269404-39330713	protein_coding	0.0121984	0	0.512198	0.5	0.0347747	#N/A	0
ENSMUSG00000045107	ENSMUSG00000045107	Saysd1	chr14:20075645-20083172	protein_coding	0.718312	0.593629	1.21831	1.09363	0.15576	Saysd1	0
ENSMUSG00000034007	ENSMUSG00000034007	Scaper	chr9:55549882-55919605	protein_coding	0.718844	0	1.21884	0.5	1.28551	Scaper	0
ENSMUSG00000003070	ENSMUSG00000003070	Efna2	chr10:80179481-80190010	protein_coding	1.06079	0.0192821	1.56079	0.519282	1.58769	Efna2	0
ENSMUSG00000019792	ENSMUSG00000019792	Trmt11	chr10:30534224-30600749	protein_coding	0.720349	0.20767	1.22035	0.70767	0.786145	Trmt11	0
ENSMUSG00000044442	ENSMUSG00000044442	N6amt1	chr16:87354184-87368742	protein_coding	0.720578	0.222807	1.22058	0.722807	0.755882	N6amt1	0
ENSMUSG00000035397	ENSMUSG00000035397	Klf16	chr10:80567123-80577321	protein_coding	0.724069	0	1.22407	0.5	1.29168	Klf16	0
ENSMUSG00000057137	ENSMUSG00000057137	Tmem140	chr6:34863145-34874946	protein_coding	0.725569	0.646009	1.22557	1.14601	0.0968333	Tmem140	0
ENSMUSG00000066829	ENSMUSG00000066829	Zfp810	chr9:22276747-22307638	protein_coding	0.725745	0	1.22574	0.5	1.29366	Zfp810	0
ENSMUSG00000003134	ENSMUSG00000003134	Tbc1d8	chr1:39371498-39478747	protein_coding	0.729649	0.134245	1.22965	0.634245	0.955134	Tbc1d8	0
ENSMUSG00000066613	ENSMUSG00000066613	Zfp932	chr5:109996520-110010411	protein_coding	0.72592	0	1.22592	0.5	1.29386	Zfp932	0
ENSMUSG00000052031	ENSMUSG00000052031	Tagap1	chr17:6954964-6961156	protein_coding	0.726903	0	1.2269	0.5	1.29502	Tagap1	0
ENSMUSG00000047945	ENSMUSG00000047945	Marcksl1	chr4:129513580-129515985	protein_coding	0.728173	0	1.22817	0.5	1.29651	Marcksl1	0
ENSMUSG00000044134	ENSMUSG00000044134	Fam109a	chr5:121849027-121854599	protein_coding	0.728242	1.25961	1.22824	1.75961	-0.518661	Fam109a	0
ENSMUSG00000026097	ENSMUSG00000026097	Ormdl1	chr1:53297094-53310309	protein_coding	0.729061	0.0615113	1.22906	0.561511	1.13017	Ormdl1	0
ENSMUSG00000031015	ENSMUSG00000031015	Swap70	chr7:110221702-110283503	protein_coding	0.729489	0	1.22949	0.5	1.29806	Swap70	0
ENSMUSG00000032372	ENSMUSG00000032372	Plscr2	chr9:92275601-92297752	protein_coding	0.730858	2.165	1.23086	2.665	-1.11447	Plscr2	0
ENSMUSG00000075271	ENSMUSG00000075271	Ttc30a1	chr2:75979105-75981967	protein_coding	0.731952	0	1.23195	0.5	1.30095	Ttc30a1	0
ENSMUSG00000022438	ENSMUSG00000022438	Parvb	chr15:84232042-84315688	protein_coding	0.73325	0.126583	1.23325	0.626583	0.976888	Parvb	0
ENSMUSG00000029910	ENSMUSG00000029910	Mad2l1	chr6:66535389-66541033	protein_coding	0.733446	0	1.23345	0.5	1.30269	Mad2l1	0
ENSMUSG00000032308	ENSMUSG00000032308	Ulk3	chr9:57589451-57596233	protein_coding	0.734229	1.57621	1.23423	2.07621	-0.750342	Ulk3	0
ENSMUSG00000003206	ENSMUSG00000003206	Ebi3	chr17:55952622-55957021	protein_coding	0.115231	0	0.615231	0.5	0.2992	#N/A	0
ENSMUSG00000052852	ENSMUSG00000052852	Reep1	chr6:71707560-71810710	protein_coding	0.734703	0	1.2347	0.5	1.30416	Reep1	0
ENSMUSG00000049882	ENSMUSG00000049882	Mettl21d	chr12:69577627-69583028	protein_coding	0.736475	0	1.23647	0.5	1.30623	Mettl21d	0
ENSMUSG00000003227	ENSMUSG00000003227	Edar	chr10:58600788-58675654	protein_coding	0.0169166	0	0.516917	0.5	0.0480034	#N/A	0
ENSMUSG00000028773	ENSMUSG00000028773	Fabp3	chr4:130308594-130315463	protein_coding	0.740221	0	1.24022	0.5	1.3106	Fabp3	0
ENSMUSG00000021694	ENSMUSG00000021694	Ercc8	chr13:108158730-108195364	protein_coding	0.742216	0	1.24222	0.5	1.31292	Ercc8	0
ENSMUSG00000068335	ENSMUSG00000068335	Dok1	chr6:83030933-83033471	protein_coding	0.746308	0	1.24631	0.5	1.31766	Dok1	0
ENSMUSG00000050786	ENSMUSG00000050786	Ccdc126	chr6:49319273-49341582	protein_coding	0.747217	0	1.24722	0.5	1.31871	Ccdc126	0
ENSMUSG00000023078	ENSMUSG00000023078	Cxcl13	chr5:95956927-95961067	protein_coding	0.747542	0	1.24754	0.5	1.31909	Cxcl13	0
ENSMUSG00000003271	ENSMUSG00000003271	Sult2b1	chr7:45729982-45759612	protein_coding	0.281745	0	0.781745	0.5	0.64477	#N/A	0
ENSMUSG00000020099	ENSMUSG00000020099	Unc5b	chr10:60762609-60831581	protein_coding	0.749786	0.331948	1.24979	0.831948	0.587116	Unc5b	0
ENSMUSG00000003279	ENSMUSG00000003279	Dlgap1	chr17:69969072-70821413	protein_coding	2.41599	0.0711208	2.91599	0.571121	2.35212	Dlgap1	0
ENSMUSG00000003282	ENSMUSG00000003282	Plag1	chr4:3900995-3938423	protein_coding	0.428493	0	0.928493	0.5	0.892963	Plag1	0
ENSMUSG00000003283	ENSMUSG00000003283	Hck	chr2:153108467-153151441	protein_coding	0	0	0.5	0.5	0	#N/A	0
ENSMUSG00000033454	ENSMUSG00000033454	Zbtb1	chr12:76370265-76396950	protein_coding	0.753388	0.109372	1.25339	0.609372	1.04044	Zbtb1	0
ENSMUSG00000038065	ENSMUSG00000038065	2410066E13Rik	chr6:54681771-54700406	protein_coding	0.754812	0	1.25481	0.5	1.32747	2410066E13Rik	0
ENSMUSG00000003309	ENSMUSG00000003309	Ap1m2	chr9:21295456-21312333	protein_coding	0	0	0.5	0.5	0	#N/A	0
ENSMUSG00000039357	ENSMUSG00000039357	Fut11	chr14:20694967-20700197	protein_coding	0.757097	0	1.2571	0.5	1.3301	Fut11	0
ENSMUSG00000003341	ENSMUSG00000003341	Atp8b3	chr10:80519584-80539124	protein_coding	0	0	0.5	0.5	0	#N/A	0
ENSMUSG00000055760	ENSMUSG00000055760	Gemin6	chr17:80224440-80228497	protein_coding	0.759962	0	1.25996	0.5	1.33338	Gemin6	0
ENSMUSG00000004655	ENSMUSG00000004655	Aqp1	chr6:55336431-55348555	protein_coding	0.761577	0	1.26158	0.5	1.33523	Aqp1	0
ENSMUSG00000052798	ENSMUSG00000052798	Nup107	chr10:117750623-117792705	protein_coding	0.761694	0	1.26169	0.5	1.33536	Nup107	0
ENSMUSG00000033931	ENSMUSG00000033931	Rbm34	chr8:126947174-126971079	protein_coding	0.764036	0.172941	1.26404	0.672941	0.909486	Rbm34	0
ENSMUSG00000003352	ENSMUSG00000003352	Cacnb3	chr15:98632219-98644530	protein_coding	1.4514	1.22983	1.9514	1.72983	0.173879	Cacnb3	0
ENSMUSG00000003354	ENSMUSG00000003354	Ccdc65	chr15:98708206-98723326	protein_coding	0.067697	0	0.567697	0.5	0.183193	#N/A	0
ENSMUSG00000003355	ENSMUSG00000003355	Fkbp11	chr15:98724372-98728198	protein_coding	0.503736	0	1.00374	0.5	1.00538	Fkbp11	0
ENSMUSG00000012429	ENSMUSG00000012429	Mplkip	chr13:17695412-17699105	protein_coding	0.765577	1.40279	1.26558	1.90279	-0.588321	Mplkip	0
ENSMUSG00000060301	ENSMUSG00000060301	2610008E11Rik	chr10:79064373-79097600	protein_coding	0.766628	0	1.26663	0.5	1.34099	2610008E11Rik	0
ENSMUSG00000003378	ENSMUSG00000003378	Grik5	chr7:25009852-25072369	protein_coding	0.65619	1.27925	1.15619	1.77925	-0.621891	Grik5	0
ENSMUSG00000003379	ENSMUSG00000003379	Cd79a	chr7:24897380-24902197	protein_coding	0	0	0.5	0.5	0	#N/A	0
ENSMUSG00000034614	ENSMUSG00000034614	Pik3ip1	chr11:3330400-3342971	protein_coding	0.774287	3.45151	1.27429	3.95151	-1.63271	Pik3ip1	0
ENSMUSG00000078878	ENSMUSG00000078878	Gm14305	chr2:176708327-176721813	protein_coding	0.777541	0.210014	1.27754	0.710014	0.84745	Gm14305	0
ENSMUSG00000027132	ENSMUSG00000027132	Katnbl1	chr2:112379210-112414240	protein_coding	0.778652	0	1.27865	0.5	1.35462	Katnbl1	0
ENSMUSG00000003410	ENSMUSG00000003410	Elavl3	chr9:22015004-22052023	protein_coding	0.0424435	0.0118029	0.542443	0.511803	0.0838846	#N/A	0
ENSMUSG00000003411	ENSMUSG00000003411	Rab3b	chr4:108879062-108943324	protein_coding	0.195084	0	0.695084	0.5	0.475259	#N/A	0
ENSMUSG00000003418	ENSMUSG00000003418	St8sia6	chr2:13651019-13793808	protein_coding	0.177183	0	0.677183	0.5	0.437618	#N/A	0
ENSMUSG00000066647	ENSMUSG00000066647	Gm5113	chr7:30169874-30180209	protein_coding	0.779827	0.0221517	1.27983	0.522152	1.29341	Gm5113	0
ENSMUSG00000020083	ENSMUSG00000020083	2010107G23Rik	chr10:62107654-62143920	protein_coding	0.782043	0	1.28204	0.5	1.35844	2010107G23Rik	0
ENSMUSG00000053553	ENSMUSG00000053553	3110082I17Rik	chr5:139359738-139460502	protein_coding	0.782722	0.168022	1.28272	0.668022	0.941241	3110082I17Rik	0
ENSMUSG00000022838	ENSMUSG00000022838	Eaf2	chr16:36792883-36875003	protein_coding	0.783896	3.87917	1.2839	4.37917	-1.77013	Eaf2	0
ENSMUSG00000046605	ENSMUSG00000046605	B3gntl1	chr11:121616196-121673153	protein_coding	0.784354	0.597284	1.28435	1.09728	0.227106	B3gntl1	0
ENSMUSG00000003436	ENSMUSG00000003436	Dll3	chr7:28293552-28302238	protein_coding	0.227048	0	0.727048	0.5	0.540123	#N/A	0
ENSMUSG00000035834	ENSMUSG00000035834	Polr3g	chr13:81673842-81711013	protein_coding	0.784873	0	1.28487	0.5	1.36163	Polr3g	0
ENSMUSG00000038736	ENSMUSG00000038736	Nudcd1	chr15:44375226-44428307	protein_coding	0.787153	0	1.28715	0.5	1.36418	Nudcd1	0
ENSMUSG00000066042	ENSMUSG00000066042	Med18	chr4:132458730-132463921	protein_coding	0.787516	0.50604	1.28752	1.00604	0.355903	Med18	0
ENSMUSG00000003452	ENSMUSG00000003452	Bicd1	chr6:149408983-149563329	protein_coding	0.431674	0.0174908	0.931674	0.517491	0.848292	#N/A	0
ENSMUSG00000024044	ENSMUSG00000024044	Epb4.1l3	chr17:69156809-69289985	protein_coding	0.78803	0	1.28803	0.5	1.36517	Epb4.1l3	0
ENSMUSG00000036764	ENSMUSG00000036764	Dnajc12	chr10:63382442-63408840	protein_coding	0.788248	0	1.28825	0.5	1.36541	Dnajc12	0
ENSMUSG00000003469	ENSMUSG00000003469	Phyhip	chr14:70457475-70468832	protein_coding	0.0219349	0	0.521935	0.5	0.0619418	#N/A	0
ENSMUSG00000003476	ENSMUSG00000003476	Crhr2	chr6:55090048-55133016	protein_coding	0.0231647	0	0.523165	0.5	0.0653371	#N/A	0
ENSMUSG00000003477	ENSMUSG00000003477	Inmt	chr6:55170625-55175043	protein_coding	0.380172	0	0.880172	0.5	0.815857	#N/A	0
ENSMUSG00000003484	ENSMUSG00000003484	Cyp4f18	chr8:71988481-72009626	protein_coding	0	0	0.5	0.5	0	#N/A	0
ENSMUSG00000039754	ENSMUSG00000039754	Alkbh4	chr5:136136145-136141615	protein_coding	0.789627	0	1.28963	0.5	1.36695	Alkbh4	0
ENSMUSG00000003505	ENSMUSG00000003505	Psg18	chr7:18345421-18355009	protein_coding	0	0	0.5	0.5	0	#N/A	0
ENSMUSG00000008136	ENSMUSG00000008136	Fhl2	chr1:43123073-43163961	protein_coding	0.791386	0	1.29139	0.5	1.36892	Fhl2	0
ENSMUSG00000053687	ENSMUSG00000053687	Dpep2	chr8:105984943-105996423	protein_coding	0.792155	0.0251866	1.29216	0.525187	1.29888	Dpep2	0
ENSMUSG00000022701	ENSMUSG00000022701	2610015P09Rik	chr16:43889799-43964314	protein_coding	0.792404	0	1.2924	0.5	1.37006	2610015P09Rik	0
ENSMUSG00000079084	ENSMUSG00000079084	Ccdc82	chr9:13246981-13289409	protein_coding	0.79297	0	1.29297	0.5	1.37069	Ccdc82	0
ENSMUSG00000054894	ENSMUSG00000054894	Atp5s	chr12:69724961-69744658	protein_coding	0.793362	0	1.29336	0.5	1.37113	Atp5s	0
ENSMUSG00000042473	ENSMUSG00000042473	Tbc1d8b	chrX:139684995-139753405	protein_coding	0.794218	0	1.29422	0.5	1.37208	Tbc1d8b	0
ENSMUSG00000028189	ENSMUSG00000028189	Ctbs	chr3:146450469-146465849	protein_coding	0.795695	0	1.2957	0.5	1.37373	Ctbs	0
ENSMUSG00000003545	ENSMUSG00000003545	Fosb	chr7:19302720-19310045	protein_coding	0.0327637	0.447083	0.532764	0.947083	-0.829995	#N/A	0
ENSMUSG00000055148	ENSMUSG00000055148	Klf2	chr8:72319032-72321656	protein_coding	0.79818	1.14647	1.29818	1.64647	-0.342886	Klf2	0
ENSMUSG00000049717	ENSMUSG00000049717	Lig4	chr8:9970019-9977686	protein_coding	0.798566	0	1.29857	0.5	1.37692	Lig4	0
ENSMUSG00000003555	ENSMUSG00000003555	Cyp17a1	chr19:46667164-46672974	protein_coding	0.0353683	0	0.535368	0.5	0.0986036	#N/A	0
ENSMUSG00000081459	ENSMUSG00000081459	Gm12952	chr4:116200562-116200952		0.801615	0	1.30161	0.5	1.3803	Gm12952	0
ENSMUSG00000022009	ENSMUSG00000022009	Nufip1	chr14:76110890-76137379	protein_coding	0.802249	0.150399	1.30225	0.650399	1.00161	Nufip1	0
ENSMUSG00000003575	ENSMUSG00000003575	Crtc1	chr8:70382354-70439579	protein_coding	1.70207	0.929716	2.20207	1.42972	0.623132	Crtc1	0
ENSMUSG00000034930	ENSMUSG00000034930	Rtkn	chr6:83135462-83152579	protein_coding	0.803324	0	1.30332	0.5	1.3822	Rtkn	0
ENSMUSG00000003585	ENSMUSG00000003585	Sec14l2	chr11:4097038-4123415	protein_coding	0.217922	0	0.717922	0.5	0.521899	#N/A	0
ENSMUSG00000026578	ENSMUSG00000026578	Ccdc181	chr1:164275584-164287847	protein_coding	0.803616	0	1.30362	0.5	1.38252	Ccdc181	0
ENSMUSG00000018449	ENSMUSG00000018449	Rpain	chr11:70970212-70977833	protein_coding	0.804574	0	1.30457	0.5	1.38358	Rpain	0
ENSMUSG00000021113	ENSMUSG00000021113	Snapc1	chr12:73964529-73984820	protein_coding	0.805464	0	1.30546	0.5	1.38456	Snapc1	0
ENSMUSG00000039481	ENSMUSG00000039481	Nrtn	chr17:56751324-56757530	protein_coding	0.807086	0	1.30709	0.5	1.38635	Nrtn	0
ENSMUSG00000003657	ENSMUSG00000003657	Calb2	chr8:110142538-110168206	protein_coding	0	0	0.5	0.5	0	#N/A	0
ENSMUSG00000078960	ENSMUSG00000078960	Tob2	chr15:81857673-81858796	protein_coding	0.807629	3.60354	1.30763	4.10354	-1.64992	Tob2	0
ENSMUSG00000025200	ENSMUSG00000025200	Cwf19l1	chr19:44108643-44135876	protein_coding	0.809685	1.64531	1.30968	2.14531	-0.711966	Cwf19l1	0
ENSMUSG00000003665	ENSMUSG00000003665	Has1	chr17:17843327-17855188	protein_coding	0.121475	0	0.621475	0.5	0.313768	#N/A	0
ENSMUSG00000031982	ENSMUSG00000031982	Arv1	chr8:124722138-124734123	protein_coding	0.810568	0	1.31057	0.5	1.39019	Arv1	0
ENSMUSG00000029246	ENSMUSG00000029246	Ppat	chr5:76913248-76951578	protein_coding	0.811361	0.0287042	1.31136	0.528704	1.31053	Ppat	0
ENSMUSG00000039873	ENSMUSG00000039873	Neurl2	chr2:164830731-164833456	protein_coding	0.81544	0	1.31544	0.5	1.39555	Neurl2	0
ENSMUSG00000022000	ENSMUSG00000022000	Zc3h13	chr14:75284372-75344426	protein_coding	0.816397	0.191958	1.3164	0.691958	0.927838	Zc3h13	0
ENSMUSG00000003752	ENSMUSG00000003752	Itpkc	chr7:27207171-27228628	protein_coding	1.39347	0.0371055	1.89347	0.537106	1.81776	Itpkc	0
ENSMUSG00000031381	ENSMUSG00000031381	Piga	chrX:164419792-164433916	protein_coding	0.817236	0	1.31724	0.5	1.39751	Piga	0
ENSMUSG00000024151	ENSMUSG00000024151	Msh2	chr17:87672329-87723713	protein_coding	0.819186	0.0487802	1.31919	0.54878	1.26535	Msh2	0
ENSMUSG00000003779	ENSMUSG00000003779	Kif20a	chr18:34624623-34633265	protein_coding	0.535453	0	1.03545	0.5	1.05026	Kif20a	0
ENSMUSG00000040282	ENSMUSG00000040282	BC052040	chr2:115581715-115778768	protein_coding	0.824512	1.21801	1.32451	1.71801	-0.375278	BC052040	0
ENSMUSG00000074102	ENSMUSG00000074102	Rbm15b	chr9:106880928-106882289	protein_coding	0.825668	0	1.32567	0.5	1.40672	Rbm15b	0
ENSMUSG00000029735	ENSMUSG00000029735	Tpk1	chr6:43345000-43666278	protein_coding	0.825883	0	1.32588	0.5	1.40695	Tpk1	0
ENSMUSG00000022656	ENSMUSG00000022656	Pvrl3	chr16:46387705-46498525	protein_coding	0.828425	0	1.32842	0.5	1.40972	Pvrl3	0
ENSMUSG00000021245	ENSMUSG00000021245	Mlh3	chr12:85234528-85270591	protein_coding	0.828809	0.0218527	1.32881	0.521853	1.34842	Mlh3	0
ENSMUSG00000054381	ENSMUSG00000054381	Zfp747	chr7:127372563-127376050	protein_coding	0.833243	0	1.33324	0.5	1.41494	Zfp747	0
ENSMUSG00000003824	ENSMUSG00000003824	Syce2	chr8:84872110-84888221	protein_coding	0.218645	0	0.718645	0.5	0.523351	Syce2	0
ENSMUSG00000000600	ENSMUSG00000000600	Krit1	chr5:3803164-3844515	protein_coding	0.835285	0.352361	1.33529	0.852361	0.647611	Krit1	0
ENSMUSG00000020303	ENSMUSG00000020303	Stc2	chr11:31357306-31370074	protein_coding	0.837103	0	1.3371	0.5	1.41911	Stc2	0
ENSMUSG00000041671	ENSMUSG00000041671	Pyroxd1	chr6:142345653-142363257	protein_coding	0.838622	0	1.33862	0.5	1.42075	Pyroxd1	0
ENSMUSG00000003863	ENSMUSG00000003863	Ppfia3	chr7:45339125-45367019	protein_coding	0.264203	0	0.764203	0.5	0.612028	#N/A	0
ENSMUSG00000033313	ENSMUSG00000033313	Fbxl8	chr8:105264647-105269326	protein_coding	0.840913	0	1.34091	0.5	1.42322	Fbxl8	0
ENSMUSG00000018239	ENSMUSG00000018239	Zcchc10	chr11:53324678-53333301	protein_coding	0.84218	0	1.34218	0.5	1.42458	Zcchc10	0
ENSMUSG00000003872	ENSMUSG00000003872	Lin7b	chr7:45367890-45370583	protein_coding	0.218362	0	0.718362	0.5	0.522783	Lin7b	0
ENSMUSG00000028100	ENSMUSG00000028100	Nudt17	chr3:96705891-96708560	protein_coding	0.842998	0	1.343	0.5	1.42546	Nudt17	0
ENSMUSG00000003882	ENSMUSG00000003882	Il7r	chr15:9506160-9529876	protein_coding	0.030372	0.0113718	0.530372	0.511372	0.052632	#N/A	0
ENSMUSG00000022206	ENSMUSG00000022206	Npr3	chr15:11839895-11905674	protein_coding	0.84538	0.378313	1.34538	0.878313	0.615207	Npr3	0
ENSMUSG00000003929	ENSMUSG00000003929	Zfp81	chr17:33329341-33358878	protein_coding	0.136455	0	0.636455	0.5	0.34813	Zfp81	0
ENSMUSG00000003934	ENSMUSG00000003934	Efnb3	chr11:69554091-69560205	protein_coding	0.0194443	0	0.519444	0.5	0.055041	#N/A	0
ENSMUSG00000030559	ENSMUSG00000030559	Rab38	chr7:88430272-88491466	protein_coding	0.846277	0	1.34628	0.5	1.42898	Rab38	0
ENSMUSG00000003949	ENSMUSG00000003949	Hlf	chr11:90336535-90390895	protein_coding	0.127236	0	0.627236	0.5	0.32708	#N/A	0
ENSMUSG00000078675	ENSMUSG00000078675	Mup16	chr4:61515591-61519531	protein_coding	0.848254	0.0140594	1.34825	0.514059	1.39109	Mup16	0
ENSMUSG00000046731	ENSMUSG00000046731	Kctd11	chr11:69878264-69880985	protein_coding	0.848446	0.357211	1.34845	0.857211	0.653575	Kctd11	0
ENSMUSG00000003974	ENSMUSG00000003974	Grm3	chr5:9485235-9725352	protein_coding	0	0	0.5	0.5	0	#N/A	0
ENSMUSG00000025578	ENSMUSG00000025578	Cbx8	chr11:119036304-119040969	protein_coding	0.84933	0	1.34933	0.5	1.43224	Cbx8	0
ENSMUSG00000020877	ENSMUSG00000020877	Scrn2	chr11:97029937-97033958	protein_coding	0.852881	0	1.35288	0.5	1.43603	Scrn2	0
ENSMUSG00000004031	ENSMUSG00000004031	Fam5b	chr1:158245270-158356260	protein_coding	0	0	0.5	0.5	0	#N/A	0
ENSMUSG00000039476	ENSMUSG00000039476	Prrx2	chr2:30834971-30881241	protein_coding	0.853754	0	1.35375	0.5	1.43697	Prrx2	0
ENSMUSG00000004035	ENSMUSG00000004035	Gstm7	chr3:107926333-107931817	protein_coding	1.88306	0.175774	2.38306	0.675774	1.8182	Gstm7	0
ENSMUSG00000022554	ENSMUSG00000022554	Fam203a	chr15:76368897-76371403	protein_coding	0.856107	0.113753	1.35611	0.613753	1.14374	Fam203a	0
ENSMUSG00000071037	ENSMUSG00000071037	Camkmt	chr17:85090725-85458139	protein_coding	0.856833	0	1.35683	0.5	1.44024	Camkmt	0
ENSMUSG00000003190	ENSMUSG00000003190	Bcl2l12	chr7:44991221-44998712	protein_coding	0.857006	0	1.35701	0.5	1.44043	Bcl2l12	0
ENSMUSG00000053070	ENSMUSG00000053070	9230110C19Rik	chr9:8021671-8042823	protein_coding	0.857165	0	1.35716	0.5	1.4406	9230110C19Rik	0
ENSMUSG00000039231	ENSMUSG00000039231	Suv39h1	chrX:8061170-8074760	protein_coding	0.857165	1.13586	1.35716	1.63586	-0.269453	Suv39h1	0
ENSMUSG00000016181	ENSMUSG00000016181	Diexf	chr1:193104402-193130251	protein_coding	0.858666	0	1.35867	0.5	1.44219	Diexf	0
ENSMUSG00000027452	ENSMUSG00000027452	Acss1	chr2:150618104-150668500	protein_coding	0.859184	0.477887	1.35918	0.977887	0.475001	Acss1	0
ENSMUSG00000018893	ENSMUSG00000018893	Mb	chr15:77015488-77050670	protein_coding	0.860318	0	1.36032	0.5	1.44394	Mb	0
ENSMUSG00000001305	ENSMUSG00000001305	Rrp15	chr1:186720977-186749358	protein_coding	0.860972	0.0973352	1.36097	0.597335	1.18802	Rrp15	0
ENSMUSG00000025169	ENSMUSG00000025169	Ogfod3	chr11:121177590-121204711	protein_coding	0.863282	4.2318	1.36328	4.7318	-1.79531	Ogfod3	0
ENSMUSG00000066643	ENSMUSG00000066643	Wdr35	chr12:8973891-9028847	protein_coding	0.864376	0.0108646	1.36438	0.510865	1.41723	Wdr35	0
ENSMUSG00000044847	ENSMUSG00000044847	Lsm11	chr11:45928268-45944935	protein_coding	0.864931	0.811729	1.36493	1.31173	0.0573583	Lsm11	0
ENSMUSG00000057667	ENSMUSG00000057667	Bloc1s3	chr7:19505813-19508331	protein_coding	0.865788	0.0102536	1.36579	0.510254	1.42045	Bloc1s3	0
ENSMUSG00000074829	ENSMUSG00000074829	2010315B03Rik	chr9:124292990-124311750	protein_coding	0.873004	0	1.373	0.5	1.45734	2010315B03Rik	0
ENSMUSG00000006763	ENSMUSG00000006763	Saal1	chr7:46686107-46710680	protein_coding	0.878354	2.87783	1.37835	3.37783	-1.29315	Saal1	0
ENSMUSG00000004110	ENSMUSG00000004110	Cacna1e	chr1:154392518-154725920	protein_coding	0	0	0.5	0.5	0	#N/A	0
ENSMUSG00000004113	ENSMUSG00000004113	Cacna1b	chr2:24603886-24763152	protein_coding	0.327542	0.00573816	0.827542	0.505738	0.710442	#N/A	0
ENSMUSG00000027550	ENSMUSG00000027550	Lrrcc1	chr3:14533787-14572658	protein_coding	0.878899	0	1.3789	0.5	1.46352	Lrrcc1	0
ENSMUSG00000004151	ENSMUSG00000004151	Etv1	chr12:38779379-38868215	protein_coding	0.967974	0	1.46797	0.5	1.55383	#N/A	0
ENSMUSG00000004187	ENSMUSG00000004187	Kifc2	chr15:76660640-76668196	protein_coding	0.453184	0.575823	0.953184	1.07582	-0.174614	Kifc2	0
ENSMUSG00000021392	ENSMUSG00000021392	Nol8	chr13:49653349-49679015	protein_coding	0.879545	0.238996	1.37955	0.738996	0.900554	Nol8	0
ENSMUSG00000000532	ENSMUSG00000000532	Acvr1b	chr15:101174103-101213678	protein_coding	0.879824	0	1.37982	0.5	1.46448	Acvr1b	0
ENSMUSG00000004231	ENSMUSG00000004231	Pax2	chr19:44756048-44838268	protein_coding	0	0	0.5	0.5	0	#N/A	0
ENSMUSG00000028134	ENSMUSG00000028134	Ptbp2	chr3:119718741-119783388	protein_coding	0.880851	0.464896	1.38085	0.964896	0.517112	Ptbp2	0
ENSMUSG00000022911	ENSMUSG00000022911	Arl13b	chr16:62793684-62847040	protein_coding	0.88437	0	1.38437	0.5	1.46923	Arl13b	0
ENSMUSG00000061815	ENSMUSG00000061815	Rufy4	chr1:74125540-74148223	protein_coding	0.891516	0.33838	1.39152	0.83838	0.730981	Rufy4	0
ENSMUSG00000004266	ENSMUSG00000004266	Ptpn6	chr6:124720706-124738714	protein_coding	1.93235	0	2.43235	0.5	2.28235	#N/A	0
ENSMUSG00000071281	ENSMUSG00000071281	Zfp71-rs1	chr13:67705305-67729119	protein_coding	0.892226	0.0225317	1.39223	0.522532	1.4138	Zfp71-rs1	0
ENSMUSG00000022528	ENSMUSG00000022528	Hes1	chr16:30064383-30067796	protein_coding	0.892839	0	1.39284	0.5	1.47803	Hes1	0
ENSMUSG00000058748	ENSMUSG00000058748	Zfp958	chr8:4625839-4629380	protein_coding	0.893426	0	1.39343	0.5	1.47864	Zfp958	0
ENSMUSG00000010660	ENSMUSG00000010660	Plcd1	chr9:119071526-119093496	protein_coding	0.895713	0	1.39571	0.5	1.481	Plcd1	0
ENSMUSG00000004296	ENSMUSG00000004296	Il12b	chr11:44400062-44414033	protein_coding	0	0	0.5	0.5	0	#N/A	0
ENSMUSG00000034485	ENSMUSG00000034485	Uaca	chr9:60794547-60880370	protein_coding	0.896523	1.31806	1.39652	1.81806	-0.38056	Uaca	0
ENSMUSG00000040040	ENSMUSG00000040040	Ift88	chr14:57424061-57517936	protein_coding	0.898574	0	1.39857	0.5	1.48396	Ift88	0
ENSMUSG00000004328	ENSMUSG00000004328	Hif3a	chr7:17031506-17062427	protein_coding	0.287222	0	0.787222	0.5	0.654842	Hif3a	0
ENSMUSG00000004341	ENSMUSG00000004341	Gpx6	chr13:21312216-21319624	protein_coding	0	0	0.5	0.5	0	#N/A	0
ENSMUSG00000004344	ENSMUSG00000004344	Gpx5	chr13:21286428-21292731	protein_coding	0	0	0.5	0.5	0	#N/A	0
ENSMUSG00000004347	ENSMUSG00000004347	Pde1c	chr6:56069820-56369634	protein_coding	0.0314848	0	0.531485	0.5	0.0881003	#N/A	0
ENSMUSG00000025762	ENSMUSG00000025762	Larp1b	chr3:41021938-41040234	protein_coding	0.898893	0.139589	1.39889	0.639589	1.12907	Larp1b	0
ENSMUSG00000004359	ENSMUSG00000004359	Spic	chr10:88674771-88685015	protein_coding	0.449733	0.528422	0.949733	1.02842	-0.114838	#N/A	0
ENSMUSG00000004360	ENSMUSG00000004360	9330159F19Rik	chr10:29211642-29230779	protein_coding	0.39516	0.093282	0.89516	0.593282	0.593428	9330159F19Rik	0
ENSMUSG00000038005	ENSMUSG00000038005	2700029M09Rik	chr8:60890417-60907580	protein_coding	0.899329	0.291253	1.39933	0.791253	0.822524	2700029M09Rik	0
ENSMUSG00000004366	ENSMUSG00000004366	Sst	chr16:23889580-23890844	protein_coding	0	0	0.5	0.5	0	#N/A	0
ENSMUSG00000004371	ENSMUSG00000004371	Il11	chr7:4773054-4782857	protein_coding	0.112291	0.0458895	0.612291	0.54589	0.165609	#N/A	0
ENSMUSG00000062906	ENSMUSG00000062906	Hdac10	chr15:89123306-89128700	protein_coding	0.900193	0.737442	1.40019	1.23744	0.178265	Hdac10	0
ENSMUSG00000044155	ENSMUSG00000044155	Naa38	chr6:18848578-18855751	protein_coding	0.9004	0	1.4004	0.5	1.48584	Naa38	0
ENSMUSG00000040302	ENSMUSG00000040302	Rbm48	chr5:3583977-3596585	protein_coding	0.902138	0	1.40214	0.5	1.48763	Rbm48	0
ENSMUSG00000065378	ENSMUSG00000065378	Gm22744	chr19:8725091-8725156		215.772	0	216.272	0.5	8.7567	#N/A	1
ENSMUSG00000028578	ENSMUSG00000028578	Caap1	chr4:94500080-94556796	protein_coding	0.903168	0	1.40317	0.5	1.48869	Caap1	0
ENSMUSG00000050555	ENSMUSG00000050555	Hyls1	chr9:35560819-35570103	protein_coding	0.906437	0	1.40644	0.5	1.49204	Hyls1	0
ENSMUSG00000031843	ENSMUSG00000031843	Mphosph6	chr8:117791644-117801929	protein_coding	0.909503	0	1.4095	0.5	1.49519	Mphosph6	0
ENSMUSG00000064336	ENSMUSG00000064336	mt-Tf	chrM:0-68		167.065	0	167.565	0.5	8.38858	#N/A	1
ENSMUSG00000072889	ENSMUSG00000072889	Nfxl1	chr5:72513300-72559684	protein_coding	0.913236	0.360837	1.41324	0.860837	0.71519	Nfxl1	0
ENSMUSG00000004473	ENSMUSG00000004473	Clec11a	chr7:44303769-44306959	protein_coding	0.490311	0	0.990311	0.5	0.985954	Clec11a	0
ENSMUSG00000004500	ENSMUSG00000004500	Zfp324	chr7:12965837-12974236	protein_coding	1.0134	0	1.5134	0.5	1.59779	Zfp324	0
ENSMUSG00000027285	ENSMUSG00000027285	Haus2	chr2:120609382-120621560	protein_coding	0.915064	0.0742507	1.41506	0.574251	1.30111	Haus2	0
ENSMUSG00000058297	ENSMUSG00000058297	Spock2	chr10:60106218-60135198	protein_coding	0.918177	0.580506	1.41818	1.08051	0.392331	Spock2	0
ENSMUSG00000040297	ENSMUSG00000040297	Suco	chr1:161816111-161876661	protein_coding	0.920213	0	1.42021	0.5	1.50611	Suco	0
ENSMUSG00000004540	ENSMUSG00000004540	Psg17	chr7:18813936-18821607	protein_coding	0	0	0.5	0.5	0	#N/A	0
ENSMUSG00000004542	ENSMUSG00000004542	Psg19	chr7:18789566-18798520	protein_coding	0.0427862	0.159006	0.542786	0.659006	-0.279908	#N/A	0
ENSMUSG00000004552	ENSMUSG00000004552	Ctse	chr1:131638305-131675503	protein_coding	0	0	0.5	0.5	0	#N/A	0
ENSMUSG00000035051	ENSMUSG00000035051	Dhx57	chr17:80238303-80290476	protein_coding	0.922304	0	1.4223	0.5	1.50823	Dhx57	0
ENSMUSG00000068221	ENSMUSG00000068221	Pdxp	chr15:78913918-78919517	protein_coding	0.924458	0	1.42446	0.5	1.51041	Pdxp	0
ENSMUSG00000056708	ENSMUSG00000056708	Ier5	chr1:155096366-155099636	protein_coding	0.926247	1.51017	1.42625	2.01017	-0.495094	Ier5	0
ENSMUSG00000025436	ENSMUSG00000025436	Xrcc6bp1	chr10:126868429-126901371	protein_coding	0.927241	0	1.42724	0.5	1.51323	Xrcc6bp1	0
ENSMUSG00000021592	ENSMUSG00000021592	Arsk	chr13:76060421-76098660	protein_coding	0.928045	0	1.42805	0.5	1.51404	Arsk	0
ENSMUSG00000064437	ENSMUSG00000064437	Snord49b	chr11:62603078-62603150		165.772	0	166.272	0.5	8.3774	#N/A	1
ENSMUSG00000031508	ENSMUSG00000031508	Ankrd10	chr8:11611582-11635754	protein_coding	0.928968	0.989717	1.42897	1.48972	-0.0600647	Ankrd10	0
ENSMUSG00000004609	ENSMUSG00000004609	Cd33	chr7:43527455-43533171	protein_coding	0.331412	0.0163673	0.831412	0.516367	0.687166	#N/A	0
ENSMUSG00000026109	ENSMUSG00000026109	Tmeff2	chr1:50900646-51187270	protein_coding	0.929964	0	1.42996	0.5	1.51598	Tmeff2	0
ENSMUSG00000004612	ENSMUSG00000004612	Nkg7	chr7:43437072-43438246	protein_coding	0	0	0.5	0.5	0	#N/A	0
ENSMUSG00000004613	ENSMUSG00000004613	Lim2	chr7:43430087-43435991	protein_coding	0	0	0.5	0.5	0	#N/A	0
ENSMUSG00000021589	ENSMUSG00000021589	Rhobtb3	chr13:75869536-75943925	protein_coding	0.930654	0.381356	1.43065	0.881356	0.698878	Rhobtb3	0
ENSMUSG00000004630	ENSMUSG00000004630	Pcp2	chr8:3623370-3625545	protein_coding	0.524263	0.499682	1.02426	0.999682	0.0350451	Pcp2	0
ENSMUSG00000048387	ENSMUSG00000048387	Osr1	chr12:9574441-9581499	protein_coding	0.931161	1.94737	1.43116	2.44737	-0.774046	Osr1	0
ENSMUSG00000004633	ENSMUSG00000004633	Chn2	chr6:54039553-54301810	protein_coding	0.145006	0	0.645006	0.5	0.367384	#N/A	0
ENSMUSG00000074579	ENSMUSG00000074579	Lekr1	chr3:65666227-65831159	protein_coding	0.93128	0	1.43128	0.5	1.51731	Lekr1	0
ENSMUSG00000061878	ENSMUSG00000061878	Sphk1	chr11:116530924-116536674	protein_coding	0.931504	0	1.4315	0.5	1.51753	Sphk1	0
ENSMUSG00000004651	ENSMUSG00000004651	Tyr	chr7:87427404-87493411	protein_coding	0.0707241	0.0176818	0.570724	0.517682	0.140728	#N/A	0
ENSMUSG00000004654	ENSMUSG00000004654	Ghrhr	chr6:55376294-55388530	protein_coding	0	0	0.5	0.5	0	#N/A	0
ENSMUSG00000041762	ENSMUSG00000041762	Gpr155	chr2:73341505-73386572	protein_coding	0.934044	0	1.43404	0.5	1.52009	Gpr155	0
ENSMUSG00000004661	ENSMUSG00000004661	Arid3b	chr9:57790352-57836793	protein_coding	0.460108	0	0.960108	0.5	0.941269	#N/A	0
ENSMUSG00000006782	ENSMUSG00000006782	Cnp	chr11:100574903-100591729	protein_coding	0.93463	0	1.43463	0.5	1.52068	Cnp	0
ENSMUSG00000049164	ENSMUSG00000049164	Zfp518a	chr19:40894704-40917947	protein_coding	0.935334	0	1.43533	0.5	1.52139	Zfp518a	0
ENSMUSG00000004668	ENSMUSG00000004668	Abca13	chr11:9191941-9684259	protein_coding	0.00372357	0	0.503724	0.5	0.0107041	#N/A	0
ENSMUSG00000027968	ENSMUSG00000027968	Larp7	chr3:127536953-127553348	protein_coding	0.936198	0	1.4362	0.5	1.52225	Larp7	0
ENSMUSG00000004698	ENSMUSG00000004698	Hdac9	chr12:34371502-34528889	protein_coding	0.0552481	0	0.555248	0.5	0.151204	#N/A	0
ENSMUSG00000004707	ENSMUSG00000004707	Ly9	chr1:171588623-171607410	protein_coding	0.0587721	0	0.558772	0.5	0.160332	#N/A	0
ENSMUSG00000004709	ENSMUSG00000004709	Cd244	chr1:171559192-171585318	protein_coding	0	0	0.5	0.5	0	#N/A	0
ENSMUSG00000004730	ENSMUSG00000004730	Emr1	chr17:57358685-57483529	protein_coding	0.228668	0.0386227	0.728668	0.538623	0.435987	Emr1	0
ENSMUSG00000041912	ENSMUSG00000041912	Tdrkh	chr3:94413295-94432633	protein_coding	0.93888	0	1.43888	0.5	1.52495	Tdrkh	0
ENSMUSG00000017491	ENSMUSG00000017491	Rarb	chr14:16430841-16575472	protein_coding	0.94056	1.07544	1.44056	1.57544	-0.129125	Rarb	0
ENSMUSG00000041716	ENSMUSG00000041716	Gm20604	chr12:102741731-102758672	protein_coding	0.942309	1.36745e-110	1.44231	0.5	1.52838	Gm20604	0
ENSMUSG00000021903	ENSMUSG00000021903	Galnt15	chr14:32028988-32062197	protein_coding	0.943753	0	1.44375	0.5	1.52982	Galnt15	0
ENSMUSG00000037958	ENSMUSG00000037958	Ccdc55	chr11:77044291-77078435	protein_coding	0.947403	0.0484523	1.4474	0.548452	1.40003	Ccdc55	0
ENSMUSG00000032698	ENSMUSG00000032698	Lmo2	chr2:103957985-103981878	protein_coding	0.955209	0	1.45521	0.5	1.54123	Lmo2	0
ENSMUSG00000043991	ENSMUSG00000043991	Pura	chr18:36281096-36301521	protein_coding	0.955344	0.48354	1.45534	0.98354	0.565305	Pura	0
ENSMUSG00000004814	ENSMUSG00000004814	Ccl24	chr5:135569936-135573043	protein_coding	0	0	0.5	0.5	0	#N/A	0
ENSMUSG00000038543	ENSMUSG00000038543	BC028528	chr3:95883953-95892005	protein_coding	0.955453	0.0747884	1.45545	0.574788	1.34037	BC028528	0
ENSMUSG00000004821	ENSMUSG00000004821	Tmed11	chr5:108777234-108795363	protein_coding	0	0	0.5	0.5	0	#N/A	0
ENSMUSG00000004837	ENSMUSG00000004837	Grap	chr11:61653264-61672784	protein_coding	0.373171	0	0.873171	0.5	0.804336	#N/A	0
ENSMUSG00000004842	ENSMUSG00000004842	Pou1f1	chr16:65520511-65535005	protein_coding	0.814394	0.0641646	1.31439	0.564165	1.22021	#N/A	0
ENSMUSG00000017677	ENSMUSG00000017677	Wsb1	chr11:79239371-79254671	protein_coding	0.956321	0	1.45632	0.5	1.54233	Wsb1	0
ENSMUSG00000021180	ENSMUSG00000021180	Rps6ka5	chr12:100549777-100725028	protein_coding	0.956607	0	1.45661	0.5	1.54261	Rps6ka5	0
ENSMUSG00000020273	ENSMUSG00000020273	Papolg	chr11:23862645-23895253	protein_coding	0.957725	0.00550739	1.45772	0.505507	1.52791	Papolg	0
ENSMUSG00000004864	ENSMUSG00000004864	Mapk13	chr17:28769306-28778698	protein_coding	0.0473617	0	0.547362	0.5	0.130566	#N/A	0
ENSMUSG00000028018	ENSMUSG00000028018	Gstcd	chr3:132981752-133092033	protein_coding	0.958461	0	1.45846	0.5	1.54445	Gstcd	0
ENSMUSG00000004872	ENSMUSG00000004872	Pax3	chr1:78101266-78197134	protein_coding	0.241111	0.0681164	0.741111	0.568116	0.383503	#N/A	0
ENSMUSG00000038515	ENSMUSG00000038515	Grtp1	chr8:13176868-13200624	protein_coding	0.963188	0	1.46319	0.5	1.54912	Grtp1	0
ENSMUSG00000004885	ENSMUSG00000004885	Crabp2	chr3:87948665-87953376	protein_coding	0	0	0.5	0.5	0	Crabp2	0
ENSMUSG00000004891	ENSMUSG00000004891	Nes	chr3:87971077-87980451	protein_coding	0.2173	0.436297	0.7173	0.936297	-0.38439	Nes	0
ENSMUSG00000004892	ENSMUSG00000004892	Bcan	chr3:87987530-88000356	protein_coding	0.0189212	0	0.518921	0.5	0.0535874	#N/A	0
ENSMUSG00000004894	ENSMUSG00000004894	Hapln2	chr3:88021749-88027583	protein_coding	0	0	0.5	0.5	0	#N/A	0
ENSMUSG00000066637	ENSMUSG00000066637	Ttc32	chr12:9029996-9036394	protein_coding	0.966917	2.00152	1.46692	2.50152	-0.770018	Ttc32	0
ENSMUSG00000061755	ENSMUSG00000061755	Bod1l	chr5:41787541-41844168	protein_coding	0.968859	0.168938	1.46886	0.668938	1.13475	Bod1l	0
ENSMUSG00000075327	ENSMUSG00000075327	Zbtb2	chr10:4367073-4388108	protein_coding	0.969326	0	1.46933	0.5	1.55515	Zbtb2	0
ENSMUSG00000004902	ENSMUSG00000004902	Slc25a18	chr6:120773767-120793982	protein_coding	0.144991	0	0.644991	0.5	0.367351	#N/A	0
ENSMUSG00000020137	ENSMUSG00000020137	Thap2	chr10:115369965-115384435	protein_coding	0.96945	0	1.46945	0.5	1.55528	Thap2	0
ENSMUSG00000043085	ENSMUSG00000043085	Tmem82	chr4:141613375-141618633	protein_coding	0.969517	0.826653	1.46952	1.32665	0.147551	Tmem82	0
ENSMUSG00000004933	ENSMUSG00000004933	Matk	chr10:81252934-81263365	protein_coding	0.095612	0.934184	0.595612	1.43418	-1.26779	#N/A	0
ENSMUSG00000020902	ENSMUSG00000020902	Ntn1	chr11:68209363-68400823	protein_coding	0.971734	0	1.47173	0.5	1.55752	Ntn1	0
ENSMUSG00000053769	ENSMUSG00000053769	Lysmd1	chr3:95134087-95139518	protein_coding	0.971786	0	1.47179	0.5	1.55757	Lysmd1	0
ENSMUSG00000033752	ENSMUSG00000033752	Mnd1	chr3:84087933-84155786	protein_coding	0.971951	0.54659	1.47195	1.04659	0.492033	Mnd1	0
ENSMUSG00000004939	ENSMUSG00000004939	Nmrk2	chr10:81198169-81202037	protein_coding	0.0859761	0.0406297	0.585976	0.54063	0.116201	#N/A	0
ENSMUSG00000031245	ENSMUSG00000031245	Hmgn5	chrX:109004533-109013404	protein_coding	0.973978	0	1.47398	0.5	1.55971	Hmgn5	0
ENSMUSG00000035597	ENSMUSG00000035597	Prpf39	chr12:65036332-65063386	protein_coding	0.975095	0	1.4751	0.5	1.56081	Prpf39	0
ENSMUSG00000004948	ENSMUSG00000004948	Zp3	chr5:135980098-135988624	protein_coding	0	0	0.5	0.5	0	#N/A	0
ENSMUSG00000026094	ENSMUSG00000026094	Stk17b	chr1:53755505-53785224	protein_coding	0.975775	0	1.47578	0.5	1.56147	Stk17b	0
ENSMUSG00000004952	ENSMUSG00000004952	Rasa4	chr5:136083915-136111860	protein_coding	0.500054	0	1.00005	0.5	1.00008	Rasa4	0
ENSMUSG00000004961	ENSMUSG00000004961	Syt5	chr7:4539767-4546567	protein_coding	0	0	0.5	0.5	0	#N/A	0
ENSMUSG00000038042	ENSMUSG00000038042	Ptpdc1	chr13:48577872-48625573	protein_coding	0.978654	0	1.47865	0.5	1.56428	Ptpdc1	0
ENSMUSG00000004988	ENSMUSG00000004988	Fxyd4	chr6:117933728-117937335	protein_coding	0.0560308	0	0.556031	0.5	0.153237	#N/A	0
ENSMUSG00000074682	ENSMUSG00000074682	Zcchc3	chr2:152411955-152415044	protein_coding	0.983185	0.0781796	1.48318	0.57818	1.35911	Zcchc3	0
ENSMUSG00000025217	ENSMUSG00000025217	Btrc	chr19:45363733-45533341	protein_coding	0.984918	0	1.48492	0.5	1.57038	Btrc	0
ENSMUSG00000029089	ENSMUSG00000029089	Pacrgl	chr5:48372391-48388756	protein_coding	0.985098	0	1.4851	0.5	1.57056	Pacrgl	0
ENSMUSG00000042851	ENSMUSG00000042851	Zc3h6	chr2:128967401-129018563	protein_coding	0.985349	0.171158	1.48535	0.671158	1.14608	Zc3h6	0
ENSMUSG00000005045	ENSMUSG00000005045	Chd5	chr4:152338650-152390194	protein_coding	0	0	0.5	0.5	0	#N/A	0
ENSMUSG00000078881	ENSMUSG00000078881	Gm14434	chr2:176473277-176486783	protein_coding	0.985751	0.365354	1.48575	0.865354	0.77983	Gm14434	0
ENSMUSG00000036052	ENSMUSG00000036052	Dnajb5	chr4:42949813-42959425	protein_coding	0.986828	0	1.48683	0.5	1.57224	Dnajb5	0
ENSMUSG00000039208	ENSMUSG00000039208	Metrnl	chr11:121701543-121716306	protein_coding	0.987503	2.27969	1.4875	2.77969	-0.902031	Metrnl	0
ENSMUSG00000078862	ENSMUSG00000078862	Gm14326	chr2:177935992-177957297	protein_coding	0.99059	0.0107404	1.49059	0.51074	1.54522	Gm14326	0
ENSMUSG00000065273	ENSMUSG00000065273	Gm25128	chr17:35247174-35247250		159.044	0	159.544	0.5	8.31781	#N/A	1
ENSMUSG00000005089	ENSMUSG00000005089	Slc1a2	chr2:102658658-102790784	protein_coding	0.122386	0.0814536	0.622386	0.581454	0.0981455	#N/A	0
ENSMUSG00000005102	ENSMUSG00000005102	Eif2ak4	chr2:118388617-118475234	protein_coding	1.22972	0	1.72972	0.5	1.79054	Eif2ak4	0
ENSMUSG00000074165	ENSMUSG00000074165	Zfp788	chr7:41633202-41651534	protein_coding	0.991046	0	1.49105	0.5	1.57632	Zfp788	0
ENSMUSG00000093006	ENSMUSG00000093006	Gm24157	chr11:52099057-52099153		158.301	0	158.801	0.5	8.31108	#N/A	1
ENSMUSG00000005124	ENSMUSG00000005124	Wisp1	chr15:66891319-66923201	protein_coding	0.414555	0	0.914555	0.5	0.871142	Wisp1	0
ENSMUSG00000048581	ENSMUSG00000048581	E130311K13Rik	chr3:63914683-63929472	protein_coding	0.991632	0	1.49163	0.5	1.57689	E130311K13Rik	0
ENSMUSG00000005131	ENSMUSG00000005131	4930550C14Rik	chr9:53405285-53432803	protein_coding	0.108163	0	0.608163	0.5	0.28253	#N/A	0
ENSMUSG00000051705	ENSMUSG00000051705	Senp8	chr9:59734258-59750649	protein_coding	0.992555	0	1.49255	0.5	1.57778	Senp8	0
ENSMUSG00000005148	ENSMUSG00000005148	Klf5	chr14:99298690-99313405	protein_coding	0.41225	0	0.91225	0.5	0.867501	Klf5	0
ENSMUSG00000047881	ENSMUSG00000047881	Rell1	chr5:63908895-63968905	protein_coding	0.995656	0	1.49566	0.5	1.58078	Rell1	0
ENSMUSG00000079144	ENSMUSG00000079144	A130010J15Rik	chr1:193168048-193177832	protein_coding	0.996032	0	1.49603	0.5	1.58114	A130010J15Rik	0
ENSMUSG00000046138	ENSMUSG00000046138	9930021J03Rik	chr19:29714401-29806009	protein_coding	0.997541	0.106648	1.49754	0.606648	1.30366	9930021J03Rik	0
ENSMUSG00000005202	ENSMUSG00000005202	Shbg	chr11:69614803-69617905	protein_coding	0	0	0.5	0.5	0	#N/A	0
ENSMUSG00000071040	ENSMUSG00000071040	Gm9386	chr17:80938333-80938714		0.998338	0	1.49834	0.5	1.58336	Gm9386	0
ENSMUSG00000005220	ENSMUSG00000005220	Corin	chr5:72300024-72504473	protein_coding	0	0	0.5	0.5	0	#N/A	0
ENSMUSG00000005699	ENSMUSG00000005699	Pard6a	chr8:105701153-105703493	protein_coding	0.999555	0	1.49955	0.5	1.58453	Pard6a	0
ENSMUSG00000005232	ENSMUSG00000005232	G6pc2	chr2:69211072-69227841	protein_coding	0	0	0.5	0.5	0	#N/A	0
ENSMUSG00000005233	ENSMUSG00000005233	Spc25	chr2:69193894-69206194	protein_coding	1.11116	0	1.61116	0.5	1.6881	Spc25	0
ENSMUSG00000005237	ENSMUSG00000005237	Dnahc2	chr11:69420808-69549110	protein_coding	0	0	0.5	0.5	0	#N/A	0
ENSMUSG00000005251	ENSMUSG00000005251	Ripk4	chr16:97741932-97763737	protein_coding	0.0173918	0	0.517392	0.5	0.0493291	#N/A	0
ENSMUSG00000036009	ENSMUSG00000036009	Mettl25	chr10:105763188-105841380	protein_coding	1.00113	0	1.50113	0.5	1.58605	Mettl25	0
ENSMUSG00000005267	ENSMUSG00000005267	Zfp287	chr11:62700355-62731905	protein_coding	0.284048	0.0117806	0.784048	0.511781	0.615417	#N/A	0
ENSMUSG00000048677	ENSMUSG00000048677	Tpcn2	chr7:145253922-145283927	protein_coding	1.00446	2.20617	1.50446	2.70617	-0.847007	Tpcn2	0
ENSMUSG00000058503	ENSMUSG00000058503	Fam133b	chr5:3543843-3569810	protein_coding	1.00532	0	1.50532	0.5	1.59007	Fam133b	0
ENSMUSG00000022865	ENSMUSG00000022865	Cxadr	chr16:78301495-78359785	protein_coding	1.00603	0	1.50603	0.5	1.59075	Cxadr	0
ENSMUSG00000005320	ENSMUSG00000005320	Fgfr4	chr13:55152639-55168759	protein_coding	0	0	0.5	0.5	0	#N/A	0
ENSMUSG00000005338	ENSMUSG00000005338	Cadm3	chr1:173334253-173367695	protein_coding	0.303081	0	0.803081	0.5	0.683617	Cadm3	0
ENSMUSG00000005339	ENSMUSG00000005339	Fcer1a	chr1:173221270-173227229	protein_coding	0	0	0.5	0.5	0	#N/A	0
ENSMUSG00000030231	ENSMUSG00000030231	Plekha5	chr6:140424098-140594906	protein_coding	1.00669	0.462104	1.50669	0.962104	0.647118	Plekha5	0
ENSMUSG00000005355	ENSMUSG00000005355	Casp14	chr10:78711996-78718293	protein_coding	0	0	0.5	0.5	0	#N/A	0
ENSMUSG00000005357	ENSMUSG00000005357	Slc1a6	chr10:78780495-78814825	protein_coding	0	0	0.5	0.5	0	#N/A	0
ENSMUSG00000033054	ENSMUSG00000033054	Npat	chr9:53537046-53574342	protein_coding	1.00839	0	1.50839	0.5	1.59301	Npat	0
ENSMUSG00000049823	ENSMUSG00000049823	Zbtb12	chr17:34879482-34896842	protein_coding	1.01475	0.0679952	1.51475	0.567995	1.41513	Zbtb12	0
ENSMUSG00000005364	ENSMUSG00000005364	Il5ra	chr6:106711974-106745109	protein_coding	0	0	0.5	0.5	0	#N/A	0
ENSMUSG00000065952	ENSMUSG00000065952	C330021F23Rik	chr8:3567989-3584939	protein_coding	1.01577	0	1.51577	0.5	1.60005	C330021F23Rik	0
ENSMUSG00000032652	ENSMUSG00000032652	Crebl2	chr6:134830153-134858931	protein_coding	1.0176	0.330494	1.5176	0.830494	0.86975	Crebl2	0
ENSMUSG00000079605	ENSMUSG00000079605	Zbtb9	chr17:26973166-26976205	protein_coding	1.01774	1.13038e-27	1.51774	0.5	1.60192	Zbtb9	0
ENSMUSG00000056673	ENSMUSG00000056673	Kdm5d	chrY:897787-943811	protein_coding	1.02045	0.0216418	1.52045	0.521642	1.54337	Kdm5d	0
ENSMUSG00000025959	ENSMUSG00000025959	Klf7	chr1:64029446-64122282	protein_coding	1.02106	0	1.52106	0.5	1.60508	Klf7	0
ENSMUSG00000025646	ENSMUSG00000025646	Atrip	chr9:109057932-109074124	protein_coding	1.02119	0.140381	1.52119	0.640381	1.2482	Atrip	0
ENSMUSG00000005410	ENSMUSG00000005410	Mcm5	chr8:75109527-75128439	protein_coding	0.414605	0	0.914605	0.5	0.871221	Mcm5	0
ENSMUSG00000033364	ENSMUSG00000033364	Usp37	chr1:74435509-74544286	protein_coding	1.02217	0.817756	1.52217	1.31776	0.208046	Usp37	0
ENSMUSG00000054793	ENSMUSG00000054793	Cadm4	chr7:24482022-24504539	protein_coding	1.02304	0.17097	1.52304	0.67097	1.18263	Cadm4	0
ENSMUSG00000074876	ENSMUSG00000074876	Spata5l1	chr2:122630624-122632930		1.02357	0.231797	1.52357	0.731797	1.05794	Spata5l1	0
ENSMUSG00000024778	ENSMUSG00000024778	Fas	chr19:34290658-34327770	protein_coding	1.0248	0	1.5248	0.5	1.60862	Fas	0
ENSMUSG00000005465	ENSMUSG00000005465	Il27ra	chr8:84030286-84042575	protein_coding	0.0940604	0	0.59406	0.5	0.248682	#N/A	0
ENSMUSG00000036941	ENSMUSG00000036941	Elac1	chr18:73735037-73754479	protein_coding	1.02824	0	1.52824	0.5	1.61187	Elac1	0
ENSMUSG00000001739	ENSMUSG00000001739	Cldn15	chr5:136966615-136975858	protein_coding	1.02842	0	1.52842	0.5	1.61204	Cldn15	0
ENSMUSG00000005474	ENSMUSG00000005474	Myl10	chr5:136693145-136701094	protein_coding	0	0	0.5	0.5	0	#N/A	0
ENSMUSG00000020407	ENSMUSG00000020407	Upp1	chr11:9118102-9136170	protein_coding	1.02866	0	1.52866	0.5	1.61227	Upp1	0
ENSMUSG00000067931	ENSMUSG00000067931	Zfp948	chr17:21567045-21588697	protein_coding	1.02959	0.8857	1.52959	1.3857	0.14253	Zfp948	0
ENSMUSG00000005493	ENSMUSG00000005493	Msh4	chr3:153857146-153906138	protein_coding	0	0	0.5	0.5	0	#N/A	0
ENSMUSG00000082260	ENSMUSG00000082260	Gm7429	chrX:114980969-114981317		1.02994	0	1.52994	0.5	1.61348	Gm7429	0
ENSMUSG00000005503	ENSMUSG00000005503	Evx1	chr6:52313497-52318378	protein_coding	0	0	0.5	0.5	0	#N/A	0
ENSMUSG00000031379	ENSMUSG00000031379	Pir	chrX:164269370-164373011	protein_coding	1.03	0	1.53	0.5	1.61353	Pir	0
ENSMUSG00000020561	ENSMUSG00000020561	Twistnb	chr12:33429623-33439380	protein_coding	1.03011	0	1.53011	0.5	1.61364	Twistnb	0
ENSMUSG00000020834	ENSMUSG00000020834	Dhrs13	chr11:78032279-78037866	protein_coding	1.03096	0	1.53096	0.5	1.61444	Dhrs13	0
ENSMUSG00000060459	ENSMUSG00000060459	Kng2	chr16:22985853-23029101	protein_coding	1.03112	0	1.53112	0.5	1.61459	Kng2	0
ENSMUSG00000005533	ENSMUSG00000005533	Igf1r	chr7:67952858-68226780	protein_coding	1.4279	1.64438	1.9279	2.14438	-0.15353	Igf1r	0
ENSMUSG00000090946	ENSMUSG00000090946	Ccdc71l	chr12:32378788-32382943	protein_coding	1.03121	0.315981	1.53121	0.815981	0.908065	Ccdc71l	0
ENSMUSG00000005540	ENSMUSG00000005540	Fcer2a	chr8:3681736-3694174	protein_coding	0.0591807	0	0.559181	0.5	0.161386	#N/A	0
ENSMUSG00000005547	ENSMUSG00000005547	Cyp2a5	chr7:26835304-26843548	protein_coding	0	0.0871546	0.5	0.587155	-0.231812	#N/A	0
ENSMUSG00000005553	ENSMUSG00000005553	Atp4a	chr7:30712208-30725535	protein_coding	0	0	0.5	0.5	0	#N/A	0
ENSMUSG00000028597	ENSMUSG00000028597	Gpx7	chr4:108400389-108406961	protein_coding	1.03249	0	1.53249	0.5	1.61588	Gpx7	0
ENSMUSG00000029016	ENSMUSG00000029016	Clcn6	chr4:148004258-148038821	protein_coding	1.0336	0.254906	1.5336	0.754906	1.02255	Clcn6	0
ENSMUSG00000025235	ENSMUSG00000025235	Bbs4	chr9:59321965-59353508	protein_coding	1.03501	0	1.53501	0.5	1.61825	Bbs4	0
ENSMUSG00000005583	ENSMUSG00000005583	Mef2c	chr13:83504033-83667079	protein_coding	0.416433	0.0734154	0.916433	0.573415	0.676449	Mef2c	0
ENSMUSG00000040034	ENSMUSG00000040034	Nup43	chr10:7667502-7678881	protein_coding	1.0352	0	1.5352	0.5	1.61843	Nup43	0
ENSMUSG00000022023	ENSMUSG00000022023	Wbp4	chr14:79459936-79481268	protein_coding	1.03698	0	1.53698	0.5	1.6201	Wbp4	0
ENSMUSG00000005611	ENSMUSG00000005611	Mrvi1	chr7:110868265-110982461	protein_coding	0.0695537	0	0.569554	0.5	0.187904	#N/A	0
ENSMUSG00000089989	ENSMUSG00000089989	Flt3l	chr7:45131187-45136432	protein_coding	1.03781	1.70959	1.53781	2.20959	-0.522901	Flt3l	0
ENSMUSG00000036867	ENSMUSG00000036867	Smad6	chr9:63953075-64022059	protein_coding	1.03831	0	1.53831	0.5	1.62135	Smad6	0
ENSMUSG00000028832	ENSMUSG00000028832	Stmn1	chr4:134468319-134473843	protein_coding	1.03879	0	1.53879	0.5	1.6218	Stmn1	0
ENSMUSG00000005628	ENSMUSG00000005628	Tmod4	chr3:95124475-95129209	protein_coding	0	0	0.5	0.5	0	#N/A	0
ENSMUSG00000005640	ENSMUSG00000005640	Insrr	chr3:87796950-87816101	protein_coding	0	0	0.5	0.5	0	#N/A	0
ENSMUSG00000005649	ENSMUSG00000005649	Cabp5	chr7:13398131-13408887	protein_coding	0.166426	0.119533	0.666426	0.619533	0.105264	#N/A	0
ENSMUSG00000025898	ENSMUSG00000025898	Cwf19l2	chr9:3404084-3479236	protein_coding	1.03937	0.0302452	1.53937	0.530245	1.53761	Cwf19l2	0
ENSMUSG00000030680	ENSMUSG00000030680	Pagr1a	chr7:127001481-127020327	protein_coding	1.03951	1.06633	1.53951	1.56633	-0.024917	Pagr1a	0
ENSMUSG00000005672	ENSMUSG00000005672	Kit	chr5:75574915-75656722	protein_coding	0.114672	0	0.614672	0.5	0.297889	#N/A	0
ENSMUSG00000004880	ENSMUSG00000004880	Lbr	chr1:181815315-181842401	protein_coding	1.04062	0.912705	1.54062	1.4127	0.125051	Lbr	0
ENSMUSG00000005677	ENSMUSG00000005677	Nr1i3	chr1:171213969-171220701	protein_coding	0.104499	0	0.604499	0.5	0.273812	#N/A	0
ENSMUSG00000005681	ENSMUSG00000005681	Apoa2	chr1:171225053-171226379	protein_coding	0.942208	0	1.44221	0.5	1.52828	Apoa2	0
ENSMUSG00000054659	ENSMUSG00000054659	Pm20d2	chr4:33174229-33189737	protein_coding	1.04492	0	1.54492	0.5	1.62753	Pm20d2	0
ENSMUSG00000054770	ENSMUSG00000054770	Kctd18	chr1:57955100-58018956	protein_coding	1.04574	0	1.54574	0.5	1.6283	Kctd18	0
ENSMUSG00000015224	ENSMUSG00000015224	Cyp2j9	chr4:96568428-96591578	protein_coding	1.04584	0	1.54584	0.5	1.62839	Cyp2j9	0
ENSMUSG00000037994	ENSMUSG00000037994	Slc9b2	chr3:135307699-135342767	protein_coding	1.04591	0	1.54591	0.5	1.62846	Slc9b2	0
ENSMUSG00000005696	ENSMUSG00000005696	Sh2d1a	chrX:42502452-42523697	protein_coding	0.195688	0.103595	0.695688	0.603595	0.20486	#N/A	0
ENSMUSG00000045546	ENSMUSG00000045546	Rnf113a2	chr12:84417193-84418577		1.04971	0.323128	1.54971	0.823128	0.91281	Rnf113a2	0
ENSMUSG00000042505	ENSMUSG00000042505	Acn9	chr6:6956003-7042979	protein_coding	1.05012	0	1.55012	0.5	1.63238	Acn9	0
ENSMUSG00000005705	ENSMUSG00000005705	Agrp	chr8:105566699-105568298	protein_coding	0	0	0.5	0.5	0	#N/A	0
ENSMUSG00000005716	ENSMUSG00000005716	Pvalb	chr15:78191113-78206400	protein_coding	0	0	0.5	0.5	0	#N/A	0
ENSMUSG00000068854	ENSMUSG00000068854	Hist2h2be	chr3:96221120-96223738	protein_coding	1.05098	0.139509	1.55098	0.639509	1.27814	Hist2h2be	0
ENSMUSG00000061666	ENSMUSG00000061666	Gdpd1	chr11:87033866-87074062	protein_coding	1.05143	0	1.55143	0.5	1.6336	Gdpd1	0
ENSMUSG00000005763	ENSMUSG00000005763	Cd247	chr1:165788680-165877276	protein_coding	0	0	0.5	0.5	0	#N/A	0
ENSMUSG00000005774	ENSMUSG00000005774	Rfx5	chr3:94954074-94961561	protein_coding	2.04347	0	2.54347	0.5	2.3468	Rfx5	0
ENSMUSG00000061288	ENSMUSG00000061288	Taok3	chr5:117120128-117275219	protein_coding	1.053	0.180632	1.553	0.680632	1.19011	Taok3	0
ENSMUSG00000005800	ENSMUSG00000005800	Mmp8	chr9:7558428-7568486	protein_coding	0.0511864	0	0.551186	0.5	0.140612	Mmp8	0
ENSMUSG00000025086	ENSMUSG00000025086	Trub1	chr19:57452905-57491005	protein_coding	1.05931	1.26195	1.55931	1.76195	-0.176265	Trub1	0
ENSMUSG00000017764	ENSMUSG00000017764	Zswim1	chr2:164822685-164826871	protein_coding	1.06145	0	1.56145	0.5	1.64289	Zswim1	0
ENSMUSG00000021704	ENSMUSG00000021704	Mtx3	chr13:92844786-92858230	protein_coding	1.06176	0.0752327	1.56176	0.575233	1.44096	Mtx3	0
ENSMUSG00000020142	ENSMUSG00000020142	Slc1a4	chr11:20302179-20332713	protein_coding	1.06194	0	1.56194	0.5	1.64334	Slc1a4	0
ENSMUSG00000026303	ENSMUSG00000026303	Mlph	chr1:90915084-90951142	protein_coding	1.06422	0.0154359	1.56422	0.515436	1.60158	Mlph	0
ENSMUSG00000005824	ENSMUSG00000005824	Tnfsf14	chr17:57189491-57194189	protein_coding	0	0	0.5	0.5	0	#N/A	0
ENSMUSG00000021428	ENSMUSG00000021428	Riok1	chr13:38036988-38061433	protein_coding	1.06822	0	1.56822	0.5	1.64913	Riok1	0
ENSMUSG00000038742	ENSMUSG00000038742	Angptl6	chr9:20873808-20879727	protein_coding	1.06938	0	1.56938	0.5	1.65019	Angptl6	0
ENSMUSG00000005864	ENSMUSG00000005864	Cnga2	chrX:71991848-72010218	protein_coding	0.0202368	0	0.520237	0.5	0.0572404	Cnga2	0
ENSMUSG00000047330	ENSMUSG00000047330	Kcne4	chr1:78816948-78820024	protein_coding	1.07074	0.893159	1.57074	1.39316	0.173084	Kcne4	0
ENSMUSG00000020589	ENSMUSG00000020589	Fam49a	chr12:12262138-12376359	protein_coding	1.07222	0.318664	1.57222	0.818664	0.94146	Fam49a	0
ENSMUSG00000021643	ENSMUSG00000021643	Serf1	chr13:100107996-100114571	protein_coding	1.07315	0	1.57315	0.5	1.65366	Serf1	0
ENSMUSG00000038225	ENSMUSG00000038225	Ccdc111	chr8:46575578-46617212	protein_coding	1.0733	0.722301	1.5733	1.2223	0.364194	Ccdc111	0
ENSMUSG00000005883	ENSMUSG00000005883	Spo11	chr2:172977699-172993576	protein_coding	0	0	0.5	0.5	0	#N/A	0
ENSMUSG00000036459	ENSMUSG00000036459	Wtip	chr7:34109542-34133268	protein_coding	1.07382	0	1.57382	0.5	1.65427	Wtip	0
ENSMUSG00000005891	ENSMUSG00000005891	Prl4a1	chr13:28016211-28023548	protein_coding	0	0	0.5	0.5	0	#N/A	0
ENSMUSG00000005892	ENSMUSG00000005892	Trh	chr6:92242060-92244650	protein_coding	0	0	0.5	0.5	0	#N/A	0
ENSMUSG00000053897	ENSMUSG00000053897	Slc39a8	chr3:135825278-135888572	protein_coding	1.07502	0.0146512	1.57502	0.514651	1.6137	Slc39a8	0
ENSMUSG00000036721	ENSMUSG00000036721	Zscan12	chr13:21362826-21369824	protein_coding	1.07641	0.0160491	1.57641	0.516049	1.61106	Zscan12	0
ENSMUSG00000031458	ENSMUSG00000031458	Coprs	chr8:13884787-13890271	protein_coding	1.0784	1.90314	1.5784	2.40314	-0.606458	Coprs	0
ENSMUSG00000020389	ENSMUSG00000020389	Cdkl3	chr11:52004220-52089784	protein_coding	1.07887	0.327973	1.57887	0.827973	0.931237	Cdkl3	0
ENSMUSG00000005917	ENSMUSG00000005917	Otx1	chr11:21994763-22002897	protein_coding	0.100505	0.118437	0.600505	0.618437	-0.0424504	#N/A	0
ENSMUSG00000019699	ENSMUSG00000019699	Akt3	chr1:177020072-177258203	protein_coding	1.08075	0	1.58075	0.5	1.66061	Akt3	0
ENSMUSG00000005947	ENSMUSG00000005947	Itgae	chr11:73090582-73147446	protein_coding	0.287383	0	0.787383	0.5	0.655137	Itgae	0
ENSMUSG00000078897	ENSMUSG00000078897	Gm4724	chr2:175422299-175435807	protein_coding	1.08195	0.266919	1.58195	0.766919	1.04456	Gm4724	0
ENSMUSG00000024135	ENSMUSG00000024135	Srbd1	chr17:85984664-86145175	protein_coding	1.08198	1.29249	1.58198	1.79249	-0.180234	Srbd1	0
ENSMUSG00000033014	ENSMUSG00000033014	Trim33	chr3:103279292-103358768	protein_coding	1.0841	0.0132632	1.5841	0.513263	1.62589	Trim33	0
ENSMUSG00000005952	ENSMUSG00000005952	Trpv1	chr11:73234291-73261242	protein_coding	0	0	0.5	0.5	0	#N/A	0
ENSMUSG00000005958	ENSMUSG00000005958	Ephb3	chr16:21204754-21223305	protein_coding	0.533097	0.0384922	1.0331	0.538492	0.939978	Ephb3	0
ENSMUSG00000005968	ENSMUSG00000005968	Tuft1	chr3:94612756-94658872	protein_coding	0	0	0.5	0.5	0	Tuft1	0
ENSMUSG00000041096	ENSMUSG00000041096	Tspyl2	chrX:152336851-152342425	protein_coding	1.09271	0	1.59271	0.5	1.67148	Tspyl2	0
ENSMUSG00000005980	ENSMUSG00000005980	Dnase1	chr16:4036941-4040024	protein_coding	0.302777	0	0.802777	0.5	0.683071	#N/A	0
ENSMUSG00000007617	ENSMUSG00000007617	Homer1	chr13:93303756-93404129	protein_coding	1.09494	0	1.59494	0.5	1.6735	Homer1	0
ENSMUSG00000020070	ENSMUSG00000020070	Rufy2	chr10:62980222-63017210	protein_coding	1.0981	0.0814166	1.5981	0.581417	1.45871	Rufy2	0
ENSMUSG00000005983	ENSMUSG00000005983	1700037C18Rik	chr16:3895178-3908689	protein_coding	1.18663	0.0493449	1.68663	0.549345	1.61836	1700037C18Rik	0
ENSMUSG00000005986	ENSMUSG00000005986	Ankrd13d	chr19:4270179-4283137	protein_coding	0	0	0.5	0.5	0	#N/A	0
ENSMUSG00000005994	ENSMUSG00000005994	Tyrp1	chr4:80834122-80851719	protein_coding	0	0	0.5	0.5	0	#N/A	0
ENSMUSG00000067321	ENSMUSG00000067321	Gm7931	chr5:46414343-46414616		1.10041	0	1.60041	0.5	1.67844	Gm7931	0
ENSMUSG00000006007	ENSMUSG00000006007	Pdc	chr1:150319416-150333905	protein_coding	0	0	0.5	0.5	0	#N/A	0
ENSMUSG00000032420	ENSMUSG00000032420	Nt5e	chr9:88327608-88372089	protein_coding	1.10062	0.837984	1.60062	1.33798	0.25857	Nt5e	0
ENSMUSG00000096472	ENSMUSG00000096472	Cdkn2d	chr9:21288462-21291209	protein_coding	1.10144	0	1.60144	0.5	1.67937	Cdkn2d	0
ENSMUSG00000006019	ENSMUSG00000006019	Dhx34	chr7:16197146-16222037	protein_coding	1.71283	0.614043	2.21283	1.11404	0.990088	Dhx34	0
ENSMUSG00000022947	ENSMUSG00000022947	Cbr3	chr16:93683214-93690990	protein_coding	1.10429	0	1.60429	0.5	1.68193	Cbr3	0
ENSMUSG00000022008	ENSMUSG00000022008	1200011I18Rik	chr14:76086231-76110815	protein_coding	1.10532	0.614027	1.60532	1.11403	0.527077	1200011I18Rik	0
ENSMUSG00000049225	ENSMUSG00000049225	Pdp1	chr4:11958183-11966452	protein_coding	1.10563	1.71929	1.60563	2.21929	-0.466959	Pdp1	0
ENSMUSG00000006056	ENSMUSG00000006056	Calcoco2	chr11:96099325-96111964	protein_coding	0	0	0.5	0.5	0	#N/A	0
ENSMUSG00000049086	ENSMUSG00000049086	Bmyc	chr2:25706878-25707717	protein_coding	1.10602	0	1.60602	0.5	1.68349	Bmyc	0
ENSMUSG00000028549	ENSMUSG00000028549	Itgb3bp	chr4:99765401-99929813	protein_coding	1.1065	0.00177542	1.6065	0.501775	1.67881	Itgb3bp	0
ENSMUSG00000038535	ENSMUSG00000038535	Zfp280d	chr9:72274898-72363770	protein_coding	1.1072	0.683299	1.6072	1.1833	0.441735	Zfp280d	0
ENSMUSG00000035595	ENSMUSG00000035595	1600002K03Rik	chr10:80172943-80175146	protein_coding	1.10757	2.97477	1.60757	3.47477	-1.11204	1600002K03Rik	0
ENSMUSG00000019848	ENSMUSG00000019848	Popdc3	chr10:45178097-45318452	protein_coding	1.10938	0	1.60938	0.5	1.68651	Popdc3	0
ENSMUSG00000006143	ENSMUSG00000006143	Upk3bl	chr5:136054491-136064326	protein_coding	0	0	0.5	0.5	0	#N/A	0
ENSMUSG00000006154	ENSMUSG00000006154	Eps8l1	chr7:4460673-4479404	protein_coding	1.47328	0	1.97328	0.5	1.9806	#N/A	0
ENSMUSG00000026383	ENSMUSG00000026383	Epb4.1l5	chr1:119545032-119649000	protein_coding	1.11338	0.819592	1.61338	1.31959	0.289994	Epb4.1l5	0
ENSMUSG00000006179	ENSMUSG00000006179	Prss16	chr13:22002175-22009742	protein_coding	0.0925409	0	0.592541	0.5	0.244987	#N/A	0
ENSMUSG00000028069	ENSMUSG00000028069	Gpatch4	chr3:88043107-88055993	protein_coding	1.11365	0.46334	1.61365	0.96334	0.744211	Gpatch4	0
ENSMUSG00000006200	ENSMUSG00000006200	Rhox6	chrX:37826909-37829857	protein_coding	0	0	0.5	0.5	0	#N/A	0
ENSMUSG00000006204	ENSMUSG00000006204	5430419D17Rik	chr7:131174401-131250945	protein_coding	0	0	0.5	0.5	0	#N/A	0
ENSMUSG00000021892	ENSMUSG00000021892	Sh3bp5	chr14:31359879-31436078	protein_coding	1.11673	0	1.61673	0.5	1.69308	Sh3bp5	0
ENSMUSG00000076038	ENSMUSG00000076038	Gm22774	chr17:6131835-6131944		152.858	0	153.358	0.5	8.26076	#N/A	1
ENSMUSG00000006216	ENSMUSG00000006216	Clcnkb	chr4:141404352-141416014	protein_coding	0	0	0.5	0.5	0	#N/A	0
ENSMUSG00000054136	ENSMUSG00000054136	Adm2	chr15:89322971-89324728	protein_coding	1.11792	0	1.61792	0.5	1.69414	Adm2	0
ENSMUSG00000006219	ENSMUSG00000006219	Fblim1	chr4:141576061-141606096	protein_coding	1.61213	0.112123	2.11213	0.612123	1.78681	Fblim1	0
ENSMUSG00000019590	ENSMUSG00000019590	Cyb561	chr11:105933701-105953336	protein_coding	1.11854	0.753248	1.61854	1.25325	0.369021	Cyb561	0
ENSMUSG00000006235	ENSMUSG00000006235	Epor	chr9:21958898-21963576	protein_coding	0.105223	0	0.605223	0.5	0.275539	#N/A	0
ENSMUSG00000006241	ENSMUSG00000006241	Ccdc159	chr9:21927470-21935872	protein_coding	0.468702	0	0.968702	0.5	0.954125	Ccdc159	0
ENSMUSG00000023953	ENSMUSG00000023953	Polh	chr17:46172003-46202625	protein_coding	1.12096	0	1.62096	0.5	1.69685	Polh	0
ENSMUSG00000006269	ENSMUSG00000006269	Atp6v1b1	chr6:83743016-83758809	protein_coding	0	0	0.5	0.5	0	#N/A	0
ENSMUSG00000006270	ENSMUSG00000006270	Vax1	chr19:59166186-59170978	protein_coding	0	0	0.5	0.5	0	#N/A	0
ENSMUSG00000059772	ENSMUSG00000059772	Slx1b	chr7:126689467-126695784	protein_coding	1.12447	0.0191368	1.62447	0.519137	1.64578	Slx1b	0
ENSMUSG00000027349	ENSMUSG00000027349	Fam98b	chr2:117249738-117271540	protein_coding	1.12666	0.0406986	1.62666	0.540699	1.58902	Fam98b	0
ENSMUSG00000020513	ENSMUSG00000020513	Tubd1	chr11:86544990-86567360	protein_coding	1.12951	0.532317	1.62951	1.03232	0.658552	Tubd1	0
ENSMUSG00000009566	ENSMUSG00000009566	Fpgs	chr2:32682608-32704137	protein_coding	1.13044	0.404147	1.63044	0.904147	0.850632	Fpgs	0
ENSMUSG00000059654	ENSMUSG00000059654	Reg1	chr6:78425982-78428666	protein_coding	1.13539	0	1.63539	0.5	1.70963	Reg1	0
ENSMUSG00000004099	ENSMUSG00000004099	Dnmt1	chr9:20907205-20959888	protein_coding	1.13805	0.812595	1.63805	1.31259	0.319558	Dnmt1	0
ENSMUSG00000038296	ENSMUSG00000038296	Galnt18	chr7:111471660-111779977	protein_coding	1.13927	0	1.63927	0.5	1.71305	Galnt18	0
ENSMUSG00000070705	ENSMUSG00000070705	Eid2b	chr7:28277705-28280129	protein_coding	1.14043	0	1.64043	0.5	1.71407	Eid2b	0
ENSMUSG00000094403	ENSMUSG00000094403	Mir692-2a	chr4:125504748-125504857		148.578	0	149.078	0.5	8.21992	#N/A	1
ENSMUSG00000006310	ENSMUSG00000006310	Zbtb32	chr7:30589680-30598909	protein_coding	0.398597	0	0.898597	0.5	0.845746	#N/A	0
ENSMUSG00000006311	ENSMUSG00000006311	Etv2	chr7:30633615-30635852	protein_coding	0	0	0.5	0.5	0	#N/A	0
ENSMUSG00000006313	ENSMUSG00000006313	Upk1a	chr7:30603091-30612734	protein_coding	0.0507813	0	0.550781	0.5	0.139551	#N/A	0
ENSMUSG00000055835	ENSMUSG00000055835	Zfp1	chr8:111643442-111671008	protein_coding	1.14317	0.375766	1.64317	0.875766	0.907864	Zfp1	0
ENSMUSG00000031609	ENSMUSG00000031609	Sap30	chr8:57482706-57487860	protein_coding	1.14339	0	1.64339	0.5	1.71667	Sap30	0
ENSMUSG00000043065	ENSMUSG00000043065	Spice1	chr16:44347120-44388497	protein_coding	1.14382	0	1.64382	0.5	1.71705	Spice1	0
ENSMUSG00000006342	ENSMUSG00000006342	Susd2	chr10:75636618-75644008	protein_coding	0.279242	0.794898	0.779242	1.2949	-0.732695	Susd2	0
ENSMUSG00000047250	ENSMUSG00000047250	Ptgs1	chr2:36230425-36252272	protein_coding	1.14514	0	1.64514	0.5	1.71821	Ptgs1	0
ENSMUSG00000006345	ENSMUSG00000006345	Ggt1	chr10:75561603-75586200	protein_coding	0	0	0.5	0.5	0	#N/A	0
ENSMUSG00000029664	ENSMUSG00000029664	Tfpi2	chr6:3962593-3968375	protein_coding	1.15139	0	1.65139	0.5	1.72368	Tfpi2	0
ENSMUSG00000037845	ENSMUSG00000037845	Fdxacb1	chr9:50768235-50773348	protein_coding	1.15181	0.045766	1.65181	0.545766	1.59769	Fdxacb1	0
ENSMUSG00000006369	ENSMUSG00000006369	Fbln1	chr15:85205948-85286535	protein_coding	3.76191	1.62016	4.26191	2.12016	1.00733	Fbln1	0
ENSMUSG00000039634	ENSMUSG00000039634	Zfp189	chr4:49521175-49531517	protein_coding	1.15222	0	1.65222	0.5	1.72441	Zfp189	0
ENSMUSG00000074576	ENSMUSG00000074576	Mocs3	chr2:168230621-168232302	protein_coding	1.15359	0	1.65359	0.5	1.7256	Mocs3	0
ENSMUSG00000006386	ENSMUSG00000006386	Tek	chr4:94739288-94874976	protein_coding	0.500331	0	1.00033	0.5	1.00048	Tek	0
ENSMUSG00000006389	ENSMUSG00000006389	Mpl	chr4:118442414-118457513	protein_coding	0	0	0.5	0.5	0	#N/A	0
ENSMUSG00000052957	ENSMUSG00000052957	Gas1	chr13:60174404-60177365	protein_coding	1.15373	0	1.65373	0.5	1.72572	Gas1	0
ENSMUSG00000037190	ENSMUSG00000037190	Cyb561d2	chr9:107539010-107541865	protein_coding	1.15459	0	1.65459	0.5	1.72647	Cyb561d2	0
ENSMUSG00000025077	ENSMUSG00000025077	Dclre1a	chr19:56529160-56548222	protein_coding	1.15755	0	1.65755	0.5	1.72905	Dclre1a	0
ENSMUSG00000006398	ENSMUSG00000006398	Cdc20	chr4:118432900-118437352	protein_coding	0.609285	0	1.10928	0.5	1.14963	Cdc20	0
ENSMUSG00000006403	ENSMUSG00000006403	Adamts4	chr1:171250420-171260637	protein_coding	0.432851	1.40174	0.932851	1.90174	-1.0276	Adamts4	0
ENSMUSG00000006411	ENSMUSG00000006411	Pvrl4	chr1:171370098-171388598	protein_coding	0.174401	0.0476781	0.674401	0.547678	0.300278	#N/A	0
ENSMUSG00000019122	ENSMUSG00000019122	Ccl9	chr11:83572918-83578636	protein_coding	1.15783	0.00402197	1.65783	0.504022	1.71774	Ccl9	0
ENSMUSG00000052392	ENSMUSG00000052392	Acot4	chr12:84038378-84044723	protein_coding	1.15816	0.0375558	1.65816	0.537556	1.6251	Acot4	0
ENSMUSG00000020381	ENSMUSG00000020381	3010026O09Rik	chr11:50174443-50200115	protein_coding	1.15876	0	1.65876	0.5	1.73011	3010026O09Rik	0
ENSMUSG00000006435	ENSMUSG00000006435	Neurl1a	chr19:47178819-47259440	protein_coding	0.150439	0.358413	0.650439	0.858413	-0.400258	#N/A	0
ENSMUSG00000040972	ENSMUSG00000040972	Igsf21	chr4:140026845-140246784	protein_coding	1.15943	0	1.65943	0.5	1.73069	Igsf21	0
ENSMUSG00000006445	ENSMUSG00000006445	Epha2	chr4:141301239-141329384	protein_coding	0.202302	0.00691955	0.702302	0.50692	0.470335	#N/A	0
ENSMUSG00000029596	ENSMUSG00000029596	Sdsl	chr5:120458185-120472810	protein_coding	1.1619	0	1.6619	0.5	1.73283	Sdsl	0
ENSMUSG00000006457	ENSMUSG00000006457	Actn3	chr19:4861222-4877909	protein_coding	2.38007	0	2.88007	0.5	2.5261	Actn3	0
ENSMUSG00000006462	ENSMUSG00000006462	A530013C23Rik	chr2:167691176-167729172		0.365747	0.06689	0.865747	0.56689	0.610877	#N/A	0
ENSMUSG00000052763	ENSMUSG00000052763	Zfp212	chr6:47920475-47932639	protein_coding	1.16419	0	1.66419	0.5	1.73482	Zfp212	0
ENSMUSG00000006464	ENSMUSG00000006464	Bbs1	chr19:4886897-4906627	protein_coding	0.33689	0.257637	0.83689	0.757637	0.143531	Bbs1	0
ENSMUSG00000006469	ENSMUSG00000006469	Slc34a3	chr2:25228897-25234364	protein_coding	0	0	0.5	0.5	0	#N/A	0
ENSMUSG00000044636	ENSMUSG00000044636	Csrnp2	chr15:100479569-100495239	protein_coding	1.16559	0	1.66559	0.5	1.73603	Csrnp2	0
ENSMUSG00000051615	ENSMUSG00000051615	Rap2a	chr14:120478460-120507194	protein_coding	1.16634	0.0564471	1.66634	0.556447	1.58237	Rap2a	0
ENSMUSG00000006488	ENSMUSG00000006488	Prl7a1	chr13:27633379-27642474	protein_coding	0	0	0.5	0.5	0	#N/A	0
ENSMUSG00000006490	ENSMUSG00000006490	Prl8a9	chr13:27558008-27564604	protein_coding	0	0	0.5	0.5	0	#N/A	0
ENSMUSG00000047022	ENSMUSG00000047022	Mipol1	chr12:57230426-57497199	protein_coding	1.16888	0	1.66888	0.5	1.73888	Mipol1	0
ENSMUSG00000002343	ENSMUSG00000002343	Armc6	chr8:70220171-70234466	protein_coding	1.17133	2.79809	1.67133	3.29809	-0.980634	Armc6	0
ENSMUSG00000006522	ENSMUSG00000006522	Itih3	chr14:30908572-30923760	protein_coding	0	0	0.5	0.5	0	#N/A	0
ENSMUSG00000027832	ENSMUSG00000027832	Ptx3	chr3:66219909-66225805	protein_coding	1.17277	1.20815	1.67277	1.70815	-0.0301956	Ptx3	0
ENSMUSG00000014592	ENSMUSG00000014592	Camta1	chr4:150917321-151861876	protein_coding	1.17386	1.92274	1.67386	2.42274	-0.533461	Camta1	0
ENSMUSG00000006529	ENSMUSG00000006529	Itih1	chr14:30929179-30943289	protein_coding	0	0	0.5	0.5	0	#N/A	0
ENSMUSG00000006538	ENSMUSG00000006538	Ihh	chr1:74945318-74951651	protein_coding	0	0	0.5	0.5	0	#N/A	0
ENSMUSG00000006542	ENSMUSG00000006542	Prkag3	chr1:74739498-74749221	protein_coding	0	0.871419	0.5	1.37142	-1.45567	#N/A	0
ENSMUSG00000006546	ENSMUSG00000006546	Cryba2	chr1:74889933-74893143	protein_coding	0	0	0.5	0.5	0	#N/A	0
ENSMUSG00000006567	ENSMUSG00000006567	Atp7b	chr8:21992784-22060305	protein_coding	0.00928866	0	0.509289	0.5	0.0265555	#N/A	0
ENSMUSG00000006570	ENSMUSG00000006570	Defb2	chr8:21839925-21843482	protein_coding	0	0	0.5	0.5	0	#N/A	0
ENSMUSG00000006574	ENSMUSG00000006574	Slc4a1	chr11:102348823-102366203	protein_coding	0	0	0.5	0.5	0	#N/A	0
ENSMUSG00000006575	ENSMUSG00000006575	Rundc3a	chr11:102393402-102402555	protein_coding	1.70414	0.662397	2.20414	1.1624	0.923113	Rundc3a	0
ENSMUSG00000006576	ENSMUSG00000006576	Slc4a3	chr1:75546265-75562172	protein_coding	1.55767	1.70579	2.05767	2.20579	-0.100284	Slc4a3	0
ENSMUSG00000006586	ENSMUSG00000006586	Runx1t1	chr4:13743435-13893649	protein_coding	1.71642	0.0544337	2.21642	0.554434	1.99914	Runx1t1	0
ENSMUSG00000021703	ENSMUSG00000021703	Serinc5	chr13:92611137-92711944	protein_coding	1.1767	0.133735	1.6767	0.633735	1.40367	Serinc5	0
ENSMUSG00000045502	ENSMUSG00000045502	Niacr1	chr5:123863569-123865516	protein_coding	1.18001	0	1.68001	0.5	1.74847	Niacr1	0
ENSMUSG00000025921	ENSMUSG00000025921	Rdh10	chr1:16105773-16133734	protein_coding	1.18047	0.334514	1.68047	0.834514	1.00986	Rdh10	0
ENSMUSG00000036934	ENSMUSG00000036934	4921524J17Rik	chr8:85408758-85432841	protein_coding	1.18126	0.0790753	1.68126	0.579075	1.53772	4921524J17Rik	0
ENSMUSG00000006642	ENSMUSG00000006642	Tcf23	chr5:30968676-30977018	protein_coding	0.0597306	0	0.559731	0.5	0.162805	#N/A	0
ENSMUSG00000006649	ENSMUSG00000006649	Nphs1	chr7:30458314-30487223	protein_coding	0.018531	0.0154901	0.518531	0.51549	0.00848552	#N/A	0
ENSMUSG00000006651	ENSMUSG00000006651	Aplp1	chr7:30434980-30445582	protein_coding	0.210396	0	0.710396	0.5	0.506695	Aplp1	0
ENSMUSG00000041974	ENSMUSG00000041974	2310008H04Rik	chr16:15889226-16146851	protein_coding	1.18747	0	1.68747	0.5	1.75486	2310008H04Rik	0
ENSMUSG00000006675	ENSMUSG00000006675	P4htm	chr9:108578825-108597600	protein_coding	0.31927	0	0.81927	0.5	0.712411	P4htm	0
ENSMUSG00000021922	ENSMUSG00000021922	Itih4	chr14:30886475-30901981	protein_coding	1.18753	0.00971369	1.68753	0.509714	1.72715	Itih4	0
ENSMUSG00000006678	ENSMUSG00000006678	Pola1	chrX:93304766-93632155	protein_coding	0.513711	0.173652	1.01371	0.673652	0.589571	Pola1	0
ENSMUSG00000032305	ENSMUSG00000032305	Fam219b	chr9:57537527-57543187	protein_coding	1.18819	2.65447	1.68819	3.15447	-0.90192	Fam219b	0
ENSMUSG00000032267	ENSMUSG00000032267	Usp28	chr9:48985384-49042517	protein_coding	1.18872	0	1.68872	0.5	1.75593	Usp28	0
ENSMUSG00000006711	ENSMUSG00000006711	D130043K22Rik	chr13:24845134-24901270	protein_coding	0.00279952	0	0.5028	0.5	0.00805518	#N/A	0
ENSMUSG00000041440	ENSMUSG00000041440	Gk5	chr9:96119361-96184627	protein_coding	1.19042	1.31488	1.69042	1.81488	-0.102492	Gk5	0
ENSMUSG00000039850	ENSMUSG00000039850	Endov	chr11:119491346-119511437	protein_coding	1.19163	3.11316	1.69163	3.61316	-1.09485	Endov	0
ENSMUSG00000006720	ENSMUSG00000006720	Zfp184	chr13:21945093-21960779	protein_coding	0.0583978	0	0.558398	0.5	0.159365	#N/A	0
ENSMUSG00000006724	ENSMUSG00000006724	Cyp27b1	chr10:127048249-127053006	protein_coding	0	0	0.5	0.5	0	#N/A	0
ENSMUSG00000020733	ENSMUSG00000020733	Slc9a3r1	chr11:115163340-115181181	protein_coding	1.19459	0	1.69459	0.5	1.76094	Slc9a3r1	0
ENSMUSG00000006731	ENSMUSG00000006731	B4galnt1	chr10:127165155-127172340	protein_coding	0.811599	0	1.3116	0.5	1.39133	B4galnt1	0
ENSMUSG00000021120	ENSMUSG00000021120	Pigh	chr12:79080672-79089670	protein_coding	1.19709	0	1.69709	0.5	1.76306	Pigh	0
ENSMUSG00000046546	ENSMUSG00000046546	Fam43a	chr16:30599722-30602797	protein_coding	1.19741	0.0229109	1.69741	0.522911	1.6987	Fam43a	0
ENSMUSG00000026187	ENSMUSG00000026187	Xrcc5	chr1:72307420-72394952	protein_coding	1.201	0.0477135	1.701	0.547713	1.63489	Xrcc5	0
ENSMUSG00000027001	ENSMUSG00000027001	Dusp19	chr2:80617044-80632361	protein_coding	1.20149	0.0771187	1.70149	0.577119	1.55986	Dusp19	0
ENSMUSG00000006764	ENSMUSG00000006764	Tph2	chr10:115078640-115185022	protein_coding	0.0238089	0	0.523809	0.5	0.0671125	#N/A	0
ENSMUSG00000039968	ENSMUSG00000039968	Rsbn1l	chr5:20893027-20951822	protein_coding	1.20227	0.618457	1.70227	1.11846	0.60595	Rsbn1l	0
ENSMUSG00000020988	ENSMUSG00000020988	L2hgdh	chr12:69690435-69724874	protein_coding	1.20253	0	1.70253	0.5	1.76768	L2hgdh	0
ENSMUSG00000006784	ENSMUSG00000006784	Ttc25	chr11:100545606-100572568	protein_coding	2.44605	2.24678	2.94605	2.74678	0.101041	Ttc25	0
ENSMUSG00000075054	ENSMUSG00000075054	Yae1d1	chr13:17986639-17993351	protein_coding	1.20263	0	1.70263	0.5	1.76776	Yae1d1	0
ENSMUSG00000025986	ENSMUSG00000025986	Slc39a10	chr1:46807543-46854046	protein_coding	1.20299	0.0258079	1.70299	0.525808	1.69546	Slc39a10	0
ENSMUSG00000032624	ENSMUSG00000032624	Eml4	chr17:83350930-83480361	protein_coding	1.20381	0	1.70381	0.5	1.76876	Eml4	0
ENSMUSG00000025008	ENSMUSG00000025008	Tctn3	chr19:40596445-40612233	protein_coding	1.20413	0	1.70413	0.5	1.76904	Tctn3	0
ENSMUSG00000003273	ENSMUSG00000003273	Car11	chr7:45699842-45704682	protein_coding	1.20482	0	1.70482	0.5	1.76962	Car11	0
ENSMUSG00000006930	ENSMUSG00000006930	Hap1	chr11:100347326-100356128	protein_coding	0.565546	0	1.06555	0.5	1.09159	#N/A	0
ENSMUSG00000032834	ENSMUSG00000032834	Pwp2	chr10:78170909-78185149	protein_coding	1.20493	0.0309089	1.70493	0.530909	1.68318	Pwp2	0
ENSMUSG00000026153	ENSMUSG00000026153	Fam135a	chr1:24010757-24100341	protein_coding	1.20544	0	1.70544	0.5	1.77014	Fam135a	0
ENSMUSG00000034509	ENSMUSG00000034509	Mad2l1bp	chr17:46147389-46153553	protein_coding	1.20848	0	1.70848	0.5	1.77271	Mad2l1bp	0
ENSMUSG00000006948	ENSMUSG00000006948	Klk4	chr7:43881171-43885804	protein_coding	0	0	0.5	0.5	0	#N/A	0
ENSMUSG00000006958	ENSMUSG00000006958	Chrd	chr16:20733126-20742384	protein_coding	0.287323	0.838167	0.787323	1.33817	-0.765231	Chrd	0
ENSMUSG00000044452	ENSMUSG00000044452	Zfp507	chr7:35772345-35802989	protein_coding	1.20961	0.317115	1.70961	0.817115	1.06506	Zfp507	0
ENSMUSG00000007021	ENSMUSG00000007021	Syngr3	chr17:24685091-24689955	protein_coding	0.258264	0	0.758264	0.5	0.600772	#N/A	0
ENSMUSG00000030811	ENSMUSG00000030811	Fbxl19	chr7:127746774-127768927	protein_coding	1.21257	1.55187	1.71257	2.05187	-0.260776	Fbxl19	0
ENSMUSG00000007030	ENSMUSG00000007030	Vwa7	chr17:35016578-35026741	protein_coding	0.0455581	0	0.545558	0.5	0.125805	#N/A	0
ENSMUSG00000007033	ENSMUSG00000007033	Hspa1l	chr17:34972702-34979284	protein_coding	0.0761855	0	0.576186	0.5	0.204605	Hspa1l	0
ENSMUSG00000007034	ENSMUSG00000007034	Slc44a4	chr17:34914465-34930436	protein_coding	0	0	0.5	0.5	0	#N/A	0
ENSMUSG00000007035	ENSMUSG00000007035	Msh5	chr17:35028604-35046745	protein_coding	0	0	0.5	0.5	0	#N/A	0
ENSMUSG00000063439	ENSMUSG00000063439	B9d2	chr7:25681157-25686558	protein_coding	1.21339	0	1.71339	0.5	1.77685	B9d2	0
ENSMUSG00000055657	ENSMUSG00000055657	E030030I06Rik	chr10:22113049-22149270	protein_coding	1.21341	8.69658e-06	1.71341	0.500009	1.77685	E030030I06Rik	0
ENSMUSG00000007039	ENSMUSG00000007039	Ddah2	chr17:35059034-35062095	protein_coding	0.76953	0	1.26953	0.5	1.34429	Ddah2	0
ENSMUSG00000006344	ENSMUSG00000006344	Ggt5	chr10:75589380-75616968	protein_coding	1.21344	0.981062	1.71344	1.48106	0.210264	Ggt5	0
ENSMUSG00000062116	ENSMUSG00000062116	Zfp954	chr7:7114689-7121445	protein_coding	1.21595	0	1.71595	0.5	1.77901	Zfp954	0
ENSMUSG00000007080	ENSMUSG00000007080	Pole	chr5:110286305-110337474	protein_coding	0.300491	0	0.800491	0.5	0.678957	#N/A	0
ENSMUSG00000029920	ENSMUSG00000029920	Smarcad1	chr6:65042666-65116050	protein_coding	1.21632	0.325688	1.71632	0.825688	1.05565	Smarcad1	0
ENSMUSG00000007107	ENSMUSG00000007107	Atp1a4	chr1:172223512-172258414	protein_coding	2.69453	0.398185	3.19453	0.898185	1.83052	#N/A	0
ENSMUSG00000007122	ENSMUSG00000007122	Casq1	chr1:172209893-172219868	protein_coding	0.494796	0	0.994796	0.5	0.992473	Casq1	0
ENSMUSG00000007207	ENSMUSG00000007207	Stx1a	chr5:135023481-135051100	protein_coding	0.146255	0	0.646255	0.5	0.370175	#N/A	0
ENSMUSG00000007209	ENSMUSG00000007209	Ceacam9	chr7:16721928-16726110	protein_coding	0	0	0.5	0.5	0	#N/A	0
ENSMUSG00000029629	ENSMUSG00000029629	Phf14	chr6:11907808-12081197	protein_coding	1.21647	0.0358305	1.71647	0.53583	1.6796	Phf14	0
ENSMUSG00000007279	ENSMUSG00000007279	Scube2	chr7:109798675-109865679	protein_coding	0	0	0.5	0.5	0	#N/A	0
ENSMUSG00000024304	ENSMUSG00000024304	Cdh2	chr18:16588876-16809246	protein_coding	1.21745	0.0316361	1.71745	0.531636	1.69176	Cdh2	0
ENSMUSG00000007379	ENSMUSG00000007379	Dennd2c	chr3:103102603-103169769	protein_coding	0.249832	0.0142844	0.749832	0.514284	0.544001	#N/A	0
ENSMUSG00000035614	ENSMUSG00000035614	Fam179b	chr12:64965741-65022573	protein_coding	1.22116	0	1.72116	0.5	1.78338	Fam179b	0
ENSMUSG00000031644	ENSMUSG00000031644	Nek1	chr8:60993194-61131346	protein_coding	1.22369	1.31406	1.72369	1.81406	-0.0737218	Nek1	0
ENSMUSG00000007440	ENSMUSG00000007440	Pcdhac1	chr18:36930284-37187657	protein_coding	0.102507	0	0.602507	0.5	0.26905	#N/A	0
ENSMUSG00000007457	ENSMUSG00000007457	2310003L06Rik	chr5:87969458-87972870	protein_coding	0	0	0.5	0.5	0	#N/A	0
ENSMUSG00000040124	ENSMUSG00000040124	Gorab	chr1:163384908-163403641	protein_coding	1.22436	2.67508	1.72436	3.17508	-0.880732	Gorab	0
ENSMUSG00000039967	ENSMUSG00000039967	Zfp292	chr4:34803112-34882960	protein_coding	1.22465	0.518165	1.72465	1.01816	0.760332	Zfp292	0
ENSMUSG00000069171	ENSMUSG00000069171	Nr2f1	chr13:78188972-78199757	protein_coding	1.22506	1.24042	1.72506	1.74042	-0.012789	Nr2f1	0
ENSMUSG00000065853	ENSMUSG00000065853	Gm22354	chr14:52069299-52069369		143.527	0	144.027	0.5	8.1702	#N/A	1
ENSMUSG00000025226	ENSMUSG00000025226	Fbxl15	chr19:46328183-46330446	protein_coding	1.22737	1.45857	1.72737	1.95857	-0.181224	Fbxl15	0
ENSMUSG00000078880	ENSMUSG00000078880	Gm14308	chr2:176613363-176636344	protein_coding	1.23175	0.225589	1.73175	0.725589	1.25501	Gm14308	0
ENSMUSG00000007591	ENSMUSG00000007591	Tssk4	chr14:55650181-55652539	protein_coding	0.04632	0	0.54632	0.5	0.127818	#N/A	0
ENSMUSG00000007594	ENSMUSG00000007594	Hapln4	chr8:70083528-70090862	protein_coding	0.137738	0	0.637738	0.5	0.351036	#N/A	0
ENSMUSG00000031274	ENSMUSG00000031274	Col4a5	chrX:141475384-141689234	protein_coding	1.23238	0.478861	1.73238	0.978861	0.82358	Col4a5	0
ENSMUSG00000030188	ENSMUSG00000030188	Magohb	chr6:131284387-131293244	protein_coding	1.23401	0	1.73401	0.5	1.79411	Magohb	0
ENSMUSG00000021495	ENSMUSG00000021495	Fam193b	chr13:55539318-55571120	protein_coding	1.23481	3.90145	1.73481	4.40145	-1.3432	Fam193b	0
ENSMUSG00000026409	ENSMUSG00000026409	Pfkfb2	chr1:130689042-130729253	protein_coding	1.23638	0.718028	1.73638	1.21803	0.511535	Pfkfb2	0
ENSMUSG00000029863	ENSMUSG00000029863	Casp2	chr6:42264984-42282508	protein_coding	1.23705	0	1.73705	0.5	1.79664	Casp2	0
ENSMUSG00000007653	ENSMUSG00000007653	Gabrb2	chr11:42419756-42629028	protein_coding	0	0	0.5	0.5	0	#N/A	0
ENSMUSG00000045598	ENSMUSG00000045598	Zfp553	chr7:127233060-127238179	protein_coding	1.23731	0.635325	1.73731	1.13532	0.61375	Zfp553	0
ENSMUSG00000042302	ENSMUSG00000042302	Ehbp1	chr11:22005827-22342292	protein_coding	1.23877	0	1.73877	0.5	1.79807	Ehbp1	0
ENSMUSG00000043572	ENSMUSG00000043572	Pars2	chr4:106651068-106655282	protein_coding	1.24137	0	1.74137	0.5	1.80022	Pars2	0
ENSMUSG00000059878	ENSMUSG00000059878	Zfp422	chr6:116624015-116628999	protein_coding	1.24186	0	1.74186	0.5	1.80063	Zfp422	0
ENSMUSG00000007682	ENSMUSG00000007682	Dio2	chr12:90724553-90738438	protein_coding	0.187607	0	0.687607	0.5	0.459656	Dio2	0
ENSMUSG00000055067	ENSMUSG00000055067	Smyd3	chr1:178951959-179518041	protein_coding	1.24404	0.220297	1.74404	0.720297	1.27577	Smyd3	0
ENSMUSG00000039456	ENSMUSG00000039456	Morc3	chr16:93832120-93876072	protein_coding	1.24504	0.171373	1.74504	0.671373	1.37807	Morc3	0
ENSMUSG00000028996	ENSMUSG00000028996	Rbp7	chr4:149449686-149454978	protein_coding	1.24531	0.124007	1.74531	0.624007	1.48385	Rbp7	0
ENSMUSG00000007783	ENSMUSG00000007783	Cpt1c	chr7:44959372-44974851	protein_coding	0.780765	0.260652	1.28077	0.760652	0.751697	Cpt1c	0
ENSMUSG00000071226	ENSMUSG00000071226	Cecr2	chr6:120666368-120771190	protein_coding	1.24617	3.53023	1.74617	4.03023	-1.20667	Cecr2	0
ENSMUSG00000034795	ENSMUSG00000034795	Ccdc122	chr14:77036771-77112257	protein_coding	1.24661	0	1.74661	0.5	1.80456	Ccdc122	0
ENSMUSG00000016409	ENSMUSG00000016409	Nkap	chrX:37126794-37150746	protein_coding	1.24703	0	1.74703	0.5	1.8049	Nkap	0
ENSMUSG00000031342	ENSMUSG00000031342	Gpm6b	chrX:166238910-166388988	protein_coding	1.24709	0	1.74709	0.5	1.80495	Gpm6b	0
ENSMUSG00000007827	ENSMUSG00000007827	Ankrd26	chr6:118502563-118562256	protein_coding	0.35069	0	0.85069	0.5	0.766705	Ankrd26	0
ENSMUSG00000040464	ENSMUSG00000040464	Gtpbp10	chr5:5537453-5559538	protein_coding	1.24729	0	1.74729	0.5	1.80512	Gtpbp10	0
ENSMUSG00000051065	ENSMUSG00000051065	Mb21d2	chr16:28826175-28929698	protein_coding	1.24784	0	1.74784	0.5	1.80557	Mb21d2	0
ENSMUSG00000036712	ENSMUSG00000036712	Cyld	chr8:88697027-88751945	protein_coding	1.24952	0.126254	1.74952	0.626254	1.48214	Cyld	0
ENSMUSG00000022358	ENSMUSG00000022358	Fbxo32	chr15:58175878-58214892	protein_coding	1.25064	0.179991	1.75064	0.679991	1.36429	Fbxo32	0
ENSMUSG00000040363	ENSMUSG00000040363	Bcor	chrX:12036739-12160355	protein_coding	1.25138	0.367037	1.75138	0.867037	1.01433	Bcor	0
ENSMUSG00000039701	ENSMUSG00000039701	Usp53	chr3:122933600-122984447	protein_coding	1.25201	0	1.75201	0.5	1.80901	Usp53	0
ENSMUSG00000007877	ENSMUSG00000007877	Tcap	chr11:98383810-98384953	protein_coding	0.367678	0	0.867678	0.5	0.795232	Tcap	0
ENSMUSG00000026425	ENSMUSG00000026425	Srgap2	chr1:131285250-131527361	protein_coding	1.25287	0.000730452	1.75287	0.50073	1.80761	Srgap2	0
ENSMUSG00000047347	ENSMUSG00000047347	Gm5806	chr15:82516310-82519278		1.25303	0.156243	1.75303	0.656243	1.41755	Gm5806	0
ENSMUSG00000031608	ENSMUSG00000031608	Galnt7	chr8:57523827-57653032	protein_coding	1.25462	0	1.75462	0.5	1.81116	Galnt7	0
ENSMUSG00000011148	ENSMUSG00000011148	Adssl1	chr12:112620044-112641354	protein_coding	1.2567	0	1.7567	0.5	1.81287	Adssl1	0
ENSMUSG00000007907	ENSMUSG00000007907	Cabs1	chr5:87979438-87981544	protein_coding	0	0	0.5	0.5	0	#N/A	0
ENSMUSG00000007908	ENSMUSG00000007908	Hmgcll1	chr9:76014854-76136350	protein_coding	0	0	0.5	0.5	0	#N/A	0
ENSMUSG00000007944	ENSMUSG00000007944	Ttc9b	chr7:27653914-27656208	protein_coding	0	0	0.5	0.5	0	#N/A	0
ENSMUSG00000007946	ENSMUSG00000007946	Phox2a	chr7:101818312-101823166	protein_coding	0	0	0.5	0.5	0	#N/A	0
ENSMUSG00000026464	ENSMUSG00000026464	Zc3h11a	chr1:133619870-133661380	protein_coding	1.25765	1.0794	1.75765	1.5794	0.154271	Zc3h11a	0
ENSMUSG00000059483	ENSMUSG00000059483	Gm5528	chr1:72004287-72004770		1.25806	0	1.75806	0.5	1.81398	Gm5528	0
ENSMUSG00000007989	ENSMUSG00000007989	Fzd3	chr14:65201025-65262463	protein_coding	0.633142	0	1.13314	0.5	1.18033	Fzd3	0
ENSMUSG00000008028	ENSMUSG00000008028	1700008O03Rik	chr7:44360042-44385820	protein_coding	0.0759722	0.00729623	0.575972	0.507296	0.183171	#N/A	0
ENSMUSG00000073988	ENSMUSG00000073988	Ttpa	chr4:20007937-20030785	protein_coding	1.26066	1.70158	1.76066	2.20158	-0.322423	Ttpa	0
ENSMUSG00000047044	ENSMUSG00000047044	D030056L22Rik	chr19:18713192-18718428	protein_coding	1.26231	0	1.76231	0.5	1.81747	D030056L22Rik	0
ENSMUSG00000050910	ENSMUSG00000050910	Cdr2l	chr11:115381915-115396132	protein_coding	1.26288	0.134964	1.76288	0.634964	1.47319	Cdr2l	0
ENSMUSG00000008129	ENSMUSG00000008129	4930432K21Rik	chr8:84148024-84172590	protein_coding	0.232892	0	0.732892	0.5	0.551673	#N/A	0
ENSMUSG00000046675	ENSMUSG00000046675	Tmem251	chr12:102743759-102747561	protein_coding	1.26426	0	1.76426	0.5	1.81906	Tmem251	0
ENSMUSG00000015766	ENSMUSG00000015766	Eps8	chr6:137477244-137654876	protein_coding	1.26456	0.919261	1.76456	1.41926	0.314169	Eps8	0
ENSMUSG00000035476	ENSMUSG00000035476	Tab3	chrX:85574021-85634469	protein_coding	1.26481	0	1.76481	0.5	1.81951	Tab3	0
ENSMUSG00000056131	ENSMUSG00000056131	Pgm3	chr9:86552475-86571842	protein_coding	1.26483	2.61721	1.76483	3.11721	-0.820726	Pgm3	0
ENSMUSG00000008193	ENSMUSG00000008193	Spib	chr7:44525994-44532071	protein_coding	0.0559056	0	0.555906	0.5	0.152912	#N/A	0
ENSMUSG00000053746	ENSMUSG00000053746	Ptrh1	chr2:32775785-32777597	protein_coding	1.26501	0	1.76501	0.5	1.81968	Ptrh1	0
ENSMUSG00000057551	ENSMUSG00000057551	Zfp317	chr9:19641223-19648048	protein_coding	1.26643	1.02536	1.76643	1.52536	0.211687	Zfp317	0
ENSMUSG00000054237	ENSMUSG00000054237	Fra10ac1	chr19:38188480-38224138	protein_coding	1.2686	0	1.7686	0.5	1.82261	Fra10ac1	0
ENSMUSG00000025742	ENSMUSG00000025742	Prps2	chrX:167346321-167382749	protein_coding	1.27017	0.0291603	1.77017	0.52916	1.74211	Prps2	0
ENSMUSG00000025069	ENSMUSG00000025069	Gsto2	chr19:47865544-47886324	protein_coding	1.27247	0	1.77247	0.5	1.82576	Gsto2	0
ENSMUSG00000008307	ENSMUSG00000008307	1700109H08Rik	chr5:3571565-3584356	protein_coding	0.364608	0	0.864608	0.5	0.790118	1700109H08Rik	0
ENSMUSG00000008318	ENSMUSG00000008318	Relt	chr7:100845847-100863446	protein_coding	0.240257	0.297711	0.740257	0.797711	-0.10784	Relt	0
ENSMUSG00000021943	ENSMUSG00000021943	Gdf10	chr14:33923586-33935280	protein_coding	1.27542	0	1.77542	0.5	1.82816	Gdf10	0
ENSMUSG00000001020	ENSMUSG00000001020	S100a4	chr3:90603769-90606045	protein_coding	1.27844	0	1.77844	0.5	1.83061	S100a4	0
ENSMUSG00000035704	ENSMUSG00000035704	Alg8	chr7:97371605-97392153	protein_coding	1.27941	0.438133	1.77941	0.938133	0.923535	Alg8	0
ENSMUSG00000042821	ENSMUSG00000042821	Snai1	chr2:167538194-167542814	protein_coding	1.2805	0	1.7805	0.5	1.83228	Snai1	0
ENSMUSG00000041328	ENSMUSG00000041328	Pcf11	chr7:92643711-92669933	protein_coding	1.28211	0.547978	1.78211	1.04798	0.765978	Pcf11	0
ENSMUSG00000008398	ENSMUSG00000008398	Elk3	chr10:93247413-93311135	protein_coding	0.976741	0	1.47674	0.5	1.56242	Elk3	0
ENSMUSG00000053347	ENSMUSG00000053347	Zfp943	chr17:21962551-22071168	protein_coding	1.28223	0	1.78223	0.5	1.83368	Zfp943	0
ENSMUSG00000021390	ENSMUSG00000021390	Ogn	chr13:49608070-49624500	protein_coding	1.28251	0	1.78251	0.5	1.83391	Ogn	0
ENSMUSG00000008438	ENSMUSG00000008438	Adam21	chr12:81558583-81568474	protein_coding	0.128136	0	0.628136	0.5	0.329149	#N/A	0
ENSMUSG00000041483	ENSMUSG00000041483	Zfp281	chr1:136624900-136630053	protein_coding	1.28316	0	1.78316	0.5	1.83444	Zfp281	0
ENSMUSG00000008461	ENSMUSG00000008461	Fut1	chr7:45617605-45621059	protein_coding	0.0404887	0	0.540489	0.5	0.112336	#N/A	0
ENSMUSG00000007950	ENSMUSG00000007950	Abhd8	chr8:71456699-71463657	protein_coding	1.28405	0	1.78405	0.5	1.83516	Abhd8	0
ENSMUSG00000008482	ENSMUSG00000008482	Rnf151	chr17:24715838-24718057	protein_coding	0	0	0.5	0.5	0	#N/A	0
ENSMUSG00000008489	ENSMUSG00000008489	Elavl2	chr4:91250762-91400785	protein_coding	0	0	0.5	0.5	0	#N/A	0
ENSMUSG00000008496	ENSMUSG00000008496	Pou2f2	chr7:25091908-25159922	protein_coding	0.0252757	0	0.525276	0.5	0.0711468	#N/A	0
ENSMUSG00000024042	ENSMUSG00000024042	Sik1	chr17:31844247-31855792	protein_coding	1.2854	0.290279	1.7854	0.790279	1.17581	Sik1	0
ENSMUSG00000032035	ENSMUSG00000032035	Ets1	chr9:32696041-32757820	protein_coding	1.28606	0	1.78606	0.5	1.83678	Ets1	0
ENSMUSG00000008590	ENSMUSG00000008590	Htr3b	chr9:48935007-48964990	protein_coding	0.00391012	0	0.50391	0.5	0.0112383	#N/A	0
ENSMUSG00000008601	ENSMUSG00000008601	Rab25	chr3:88542028-88548300	protein_coding	0	0	0.5	0.5	0	#N/A	0
ENSMUSG00000022574	ENSMUSG00000022574	Naprt1	chr15:75890963-75894481	protein_coding	1.28624	0.5263	1.78624	1.0263	0.799473	Naprt1	0
ENSMUSG00000008658	ENSMUSG00000008658	Rbfox1	chr16:6809221-7412479	protein_coding	0.0576253	0	0.557625	0.5	0.157368	#N/A	0
ENSMUSG00000044991	ENSMUSG00000044991	1110034G24Rik	chr2:132686930-132751055	protein_coding	1.28652	0.989669	1.78652	1.48967	0.26216	1110034G24Rik	0
ENSMUSG00000022769	ENSMUSG00000022769	Sdf2l1	chr16:17130137-17132383	protein_coding	1.28779	0	1.78779	0.5	1.83818	Sdf2l1	0
ENSMUSG00000014850	ENSMUSG00000014850	Msh3	chr13:92211880-92355003	protein_coding	1.29028	0	1.79028	0.5	1.84019	Msh3	0
ENSMUSG00000036499	ENSMUSG00000036499	Eea1	chr10:95940662-96045518	protein_coding	1.29045	0.494868	1.79045	0.994868	0.847745	Eea1	0
ENSMUSG00000038122	ENSMUSG00000038122	D630037F22Rik	chr10:56014297-56228689	protein_coding	1.29151	0.0162653	1.79151	0.516265	1.79499	D630037F22Rik	0
ENSMUSG00000025176	ENSMUSG00000025176	Hoga1	chr19:42045609-42070953	protein_coding	1.29302	0	1.79302	0.5	1.84239	Hoga1	0
ENSMUSG00000084957	ENSMUSG00000084957	Bbip1	chr19:53929676-53944627	protein_coding	1.29314	0.182179	1.79314	0.682179	1.39427	Bbip1	0
ENSMUSG00000008789	ENSMUSG00000008789	Ceacam5	chr7:17713251-17761121	protein_coding	0	0	0.5	0.5	0	#N/A	0
ENSMUSG00000008813	ENSMUSG00000008813	Tppp2	chr14:51918424-51920699	protein_coding	0	0	0.5	0.5	0	#N/A	0
ENSMUSG00000028629	ENSMUSG00000028629	Exo5	chr4:120921195-120925017	protein_coding	1.29369	0	1.79369	0.5	1.84293	Exo5	0
ENSMUSG00000008843	ENSMUSG00000008843	Cldn13	chr5:134914248-134915526	protein_coding	0	0	0.5	0.5	0	#N/A	0
ENSMUSG00000008845	ENSMUSG00000008845	Cd163	chr6:124304650-124330527	protein_coding	0	0.0864457	0.5	0.586446	-0.230069	Cd163	0
ENSMUSG00000024528	ENSMUSG00000024528	Srfbp1	chr18:52465692-52490738	protein_coding	1.29952	0	1.79952	0.5	1.84761	Srfbp1	0
ENSMUSG00000039089	ENSMUSG00000039089	L3mbtl3	chr10:26274467-26375185	protein_coding	1.30163	0	1.80163	0.5	1.8493	L3mbtl3	0
ENSMUSG00000008874	ENSMUSG00000008874	Clec3a	chr8:114418085-114425846	protein_coding	0	0	0.5	0.5	0	#N/A	0
ENSMUSG00000075590	ENSMUSG00000075590	Nrbp2	chr15:76085594-76090013	protein_coding	1.30204	1.63414	1.80204	2.13414	-0.244024	Nrbp2	0
ENSMUSG00000008932	ENSMUSG00000008932	Slc1a7	chr4:107968331-108013532	protein_coding	0.0949435	0	0.594943	0.5	0.250825	#N/A	0
ENSMUSG00000021904	ENSMUSG00000021904	Sema3g	chr14:31217859-31230350	protein_coding	1.30439	0.157363	1.80439	0.657363	1.45675	Sema3g	0
ENSMUSG00000041840	ENSMUSG00000041840	Haus1	chr18:77757566-77767780	protein_coding	1.30614	0	1.80614	0.5	1.85291	Haus1	0
ENSMUSG00000008999	ENSMUSG00000008999	Bmp7	chr2:172868011-172940321	protein_coding	0.0829532	0	0.582953	0.5	0.221452	#N/A	0
ENSMUSG00000028583	ENSMUSG00000028583	Pdpn	chr4:143267430-143299564	protein_coding	1.30808	0	1.80808	0.5	1.85446	Pdpn	0
ENSMUSG00000032085	ENSMUSG00000032085	Tagln	chr9:45929627-45936058	protein_coding	1.31159	1.03435	1.81159	1.53435	0.239629	Tagln	0
ENSMUSG00000063200	ENSMUSG00000063200	Nol7	chr13:43398375-43402858	protein_coding	1.31177	0	1.81177	0.5	1.8574	Nol7	0
ENSMUSG00000009047	ENSMUSG00000009047	Gm5965	chr16:88777895-88778528	protein_coding	0	0	0.5	0.5	0	#N/A	0
ENSMUSG00000009070	ENSMUSG00000009070	Rtdr1	chr10:74957476-75032586	protein_coding	0	0	0.5	0.5	0	#N/A	0
ENSMUSG00000037730	ENSMUSG00000037730	Mynn	chr3:30602086-30618492	protein_coding	1.31209	0	1.81209	0.5	1.85765	Mynn	0
ENSMUSG00000009075	ENSMUSG00000009075	Cabp7	chr11:4736891-4746778	protein_coding	0.0713691	0	0.571369	0.5	0.192495	#N/A	0
[truncated: 37,196 more rows]

## Sheet: common targets
Myeov2
Hmga1-rs1
Rraga
Ctps2
Alkbh3
Apoc1
Tpt1
Fkbpl
Cnot7
Fundc2
Cox10
Cisd3
[truncated: 402 more rows]
